# Supplementary material for: Identifying efficient linkage strategies for men (IDEaL): a study protocol for an individually randomised control trial
Source: PubMed Central journal article supplement (PMC10347494; doi:10.1136/bmjopen-2022-070896), 2023-07-12
Supplement: bmjopen-2022-070896.draft_revisions.pdf [file bmjopen-2022-070896.draft_revisions.pdf]

# BMJ Open

BMJ Open is committed to open peer review. As part of this commitment we make the peer review history of every article we publish publicly available.

When an article is published we post the peer reviewers' comments and the authors' responses online. We also post the versions of the paper that were used during peer review. These are the versions that the peer review comments apply to.

The versions of the paper that follow are the versions that were submitted during the peer review process. They are not the versions of record or the final published versions. They should not be cited or distributed as the published version of this manuscript.

BMJ Open is an open access journal and the full, final, typeset and author-corrected version of record of the manuscript is available on our site with no access controls, subscription charges or pay-per-view fees (<http://bmjopen.bmj.com>).

If you have any questions on BMJ Open's open peer review process please email [info.bmjopen@bmj.com](mailto:info.bmjopen@bmj.com)

# BMJ Open

## Identifying efficient linkage strategies for HIV self-testing (IDEaL): a study protocol for an individually randomized control trial

|                               |                                                                                                                                                                                                                                                                                                                                                                                                                                                                                                                                                                                                                                                                                                                                                                                                                                                                                                                                                                                                                                                                                                                                                                                                                                                                                                                                                                                                                                                          |
|-------------------------------|----------------------------------------------------------------------------------------------------------------------------------------------------------------------------------------------------------------------------------------------------------------------------------------------------------------------------------------------------------------------------------------------------------------------------------------------------------------------------------------------------------------------------------------------------------------------------------------------------------------------------------------------------------------------------------------------------------------------------------------------------------------------------------------------------------------------------------------------------------------------------------------------------------------------------------------------------------------------------------------------------------------------------------------------------------------------------------------------------------------------------------------------------------------------------------------------------------------------------------------------------------------------------------------------------------------------------------------------------------------------------------------------------------------------------------------------------------|
| Journal:                      | <i>BMJ Open</i>                                                                                                                                                                                                                                                                                                                                                                                                                                                                                                                                                                                                                                                                                                                                                                                                                                                                                                                                                                                                                                                                                                                                                                                                                                                                                                                                                                                                                                          |
| Manuscript ID                 | bmjopen-2022-070896                                                                                                                                                                                                                                                                                                                                                                                                                                                                                                                                                                                                                                                                                                                                                                                                                                                                                                                                                                                                                                                                                                                                                                                                                                                                                                                                                                                                                                      |
| Article Type:                 | Protocol                                                                                                                                                                                                                                                                                                                                                                                                                                                                                                                                                                                                                                                                                                                                                                                                                                                                                                                                                                                                                                                                                                                                                                                                                                                                                                                                                                                                                                                 |
| Date Submitted by the Author: | 13-Dec-2022                                                                                                                                                                                                                                                                                                                                                                                                                                                                                                                                                                                                                                                                                                                                                                                                                                                                                                                                                                                                                                                                                                                                                                                                                                                                                                                                                                                                                                              |
| Complete List of Authors:     | <p>Dovel , Kathryn ; University of California Los Angeles, Division of Infectious Diseases ; Partners in Hope Medical Center, Implementation Science Department</p> <p>Balakasi, Kelvin; Partners in Hope Medical Center, Implementation Science Department</p> <p>Hubbard, Julie; University of California Los Angeles, Division of Infectious Diseases ; Partners in Hope Medical Center, Implementation Science Department</p> <p>Phiri, Khumbo; Partners in Hope Medical Center, Implementation Science Department</p> <p>Nichols, Brooke ; Boston University School of Public Health, Department of Global Health; Faculty of Health Sciences University of the Witwatersrand, Department of Internal Medicine</p> <p>Coates, Thomas; University of California Los Angeles, Division of Infectious Diseases</p> <p>Kulich, Michal; Charles University, Department of Probability and Math Statistics</p> <p>Chikuse, Elijah; Partners in Hope Medical Center, Implementation Science Department</p> <p>Phiri, Sam; Partners in Hope Medical Center, Implementation Science Department</p> <p>Long, Lawrence; Boston University School of Public Health, Department of Global Health; Faculty of Health Sciences University of the Witwatersrand, Department of Internal Medicine</p> <p>Hoffman, Risa; University of California Los Angeles, Division of Infectious Diseases</p> <p>Choko, Augustine; University of Malawi, College of Medicine</p> |
| Keywords:                     | HIV & AIDS < INFECTIOUS DISEASES, Infection control < INFECTIOUS DISEASES, Clinical trials < THERAPEUTICS                                                                                                                                                                                                                                                                                                                                                                                                                                                                                                                                                                                                                                                                                                                                                                                                                                                                                                                                                                                                                                                                                                                                                                                                                                                                                                                                                |
|                               |                                                                                                                                                                                                                                                                                                                                                                                                                                                                                                                                                                                                                                                                                                                                                                                                                                                                                                                                                                                                                                                                                                                                                                                                                                                                                                                                                                                                                                                          |

SCHOLARONE™  
Manuscripts

1  
2  
3 **Identifying efficient linkage strategies for HIV self-testing (IDEaL): a study protocol for an**  
4 **individually randomized control trial**  
5  
6  
7

8 Kathryn Dovel<sup>1,2§</sup>, Kelvin Balakasi<sup>1</sup>, Julie Hubbard<sup>1</sup>, Khumbo Phiri<sup>1</sup>, Brooke E. Nichols<sup>3,4</sup>,  
9 Thomas J. Coates<sup>1</sup>, Michal Kulich<sup>5</sup>, Elijah Chikuse<sup>2</sup>, Sam Phiri<sup>2</sup>, Lawrence Long<sup>3,4</sup>, Risa  
10 Hoffman<sup>1</sup>, Augustine Choko<sup>6</sup>.  
11  
12

13 **Author affiliations:**

14 <sup>1</sup> Division of Infectious Diseases, David Geffen School of Medicine, University of California Los  
15 Angeles, Los Angeles, CA, USA

16 <sup>2</sup> Partners in Hope, Lilongwe, Malawi

17 <sup>3</sup> Department of Global Health, Boston University School of Public Health, Boston, MA, USA

18 <sup>4</sup> Department of Internal Medicine, Faculty of Health Sciences, University of the Witwatersrand,  
19 Johannesburg, South Africa

20 <sup>5</sup> Department of Probability and Math. Statistics, Faculty of Mathematics and Physics, Charles  
21 University, Prague, Czech Republic

22 <sup>6</sup> College of Medicine, University of Malawi, Blantyre, Malawi  
23  
24  
25  
26

27 **§ Corresponding Author:** Kathryn Dovel

28 Division of Infectious Diseases, David Geffen School of Medicine

29 10833 Le Conte Ave, Los Angeles, CA 90095

30 Phone: +13108838179

31 Email: [kdovel@mednet.ucla.edu](mailto:kdovel@mednet.ucla.edu) / [kldovel@gmail.com](mailto:kldovel@gmail.com)  
32  
33  
34

35 **E-mail addresses of authors:**

36 KD: [KDovel@mednet.ucla.edu](mailto:KDovel@mednet.ucla.edu)

37 KB: [kelvin@pihmalawi.com](mailto:kelvin@pihmalawi.com)

38 JH: [jhubbard@mednet.ucla.edu](mailto:jhubbard@mednet.ucla.edu)

39 KP: [khumbo@pihmalawi.com](mailto:khumbo@pihmalawi.com)

40 BN: [brooken@bu.edu](mailto:brooken@bu.edu)

41 TC: [TCoates@mednet.ucla.edu](mailto:TCoates@mednet.ucla.edu)

42 MK: [kulich@karlin.mff.cuni.cz](mailto:kulich@karlin.mff.cuni.cz)

43 EC: [elijah@pihmalawi.com](mailto:elijah@pihmalawi.com)

44 SP: [samphiri@pihmalawi.com](mailto:samphiri@pihmalawi.com)

45 LL: [lclong@bu.edu](mailto:lclong@bu.edu)

46 RH: [RHoffman@mednet.ucla.edu](mailto:RHoffman@mednet.ucla.edu)

47 AC: [augutc@gmail.com](mailto:augutc@gmail.com)  
48  
49  
50  
51

52 **Word Count:** Abstract: 252; Manuscript: 3,967

53 **Trial registration number:** NCT05137210  
54  
55  
56  
57  
58  
59  
60

**Keywords:** HIV, men, ART initiation, ART retention, Stepped interventions, sub-Saharan Africa

**Date and version:** 30 November, 2022: Version 1

## ABSTRACT

### Introduction

Men in sub-Saharan Africa are less likely than women to initiate antiretroviral therapy (ART) and are more likely to have longer cycles of disengagement from ART programs. Treatment interventions that meet the unique needs of men are needed, but they must be scalable. We will conduct a study to test the impact of various interventions on six-month retention in ART programs among men living with HIV who are not currently engaged in care.

### Methods and Analysis

We will conduct a programmatic, individually randomized, non-blinded, non-inferiority controlled trial. “Non-engaged” men will be randomized 1:1:1 to either a Stepped, Low-Intensity, or High-Intensity arm. In the Stepped arm, intervention activities build in intensity over time for those who do not reengage in care with the following steps: 1) one-time male-specific counseling + facility navigation → 2) ongoing male mentorship + facility navigation → 3) outside-facility ART initiation + male-specific counseling + facility navigation for follow-up ART visits. The Low-Intensity Intervention includes one-time male-specific counseling + facility navigation only and the High-Intensity Intervention offers immediate outside-facility ART initiation + male-specific counseling + facility navigation for follow-up ART visits. Our primary outcome is 6-month retention in care. Secondary outcomes include cost-effectiveness and rates of adverse events.

### Ethics and Dissemination

The Institutional Review Board of the University of California, Los Angeles and the National Health Sciences Research Council in Malawi have approved the trial protocol. Findings will be disseminated rapidly in national and international forums, as well as in peer-reviewed journals and are expected to provide urgently needed information to other countries and donors.

## ARTICLE SUMMARY



### Strengths and limitations

- IDEAL provides male-specific differentiated models of care aimed to improve men's ART outcomes. We specifically focus on building trusting relationships with health care workers and developing client-led, individualized strategies to overcome barriers to care.
- IDEAL will test the impact of a stepped intervention for men. This approach promises to improve the efficiency and reach of HIV programs for men as the highest-resource interventions will only be received by the minority of men who are most in need.
- IDEAL develops and tests male-specific counseling curriculum that, if effective, could easily be taken to scale. Findings from the study will identify critical components for male-specific counseling, especially among men who struggle to be retained in HIV care.

## INTRODUCTION

Men in sub-Saharan Africa (SSA) are underrepresented in HIV programs.<sup>1</sup> Men are less likely than women to know their HIV status and to initiate antiretroviral therapy (ART), and more likely to face treatment interruptions once in care.<sup>2</sup> Men are particularly prone to cycling through ART programs, with more frequent stop-start instances and longer periods outside of care as compared to women.<sup>5-8</sup> Engagement in ART programs is not static – many men and women cycle through care, starting and stopping HIV care multiple times throughout their lifetime.<sup>3,4</sup> Men who disengage from HIV programs (either after testing HIV-positive or after enrolling in HIV care services) are frequently described as a difficult and ‘hard-to-reach’ population.<sup>9,10</sup> However, growing evidence suggests that men desire HIV services<sup>11,12</sup> but encounter multiple health systems barriers to care that make it impossible to stay in care long-term.<sup>13</sup> There is an urgent need to develop client-centered strategies tailored to men that facilitate men’s engagement and re-engagement in HIV treatment programs.

Some men may require male-specific interventions to facilitate engagement in HIV care. Men have less exposure to HIV services than women<sup>13,14</sup> and work demands may conflict with ART clinic schedules.<sup>15,16</sup> Difficult interactions with health care workers (HCWs) can also prevent men from engaging or re-engaging in care.<sup>17,18</sup> Furthermore, most ART counseling curricula do not target men and often lack the client-centered counseling needed to develop internal motivation to engage and stay engaged in care.

Differentiated service delivery models (DSD) are now being developed to improve men’s ART engagement throughout SSA.<sup>19-21</sup> As DSDs for men are developed, it is critical that strategies be feasible and cost-effective to allow scale-up. A “one size fits all” model is not as effective as more nuanced approaches.<sup>22-24</sup> Stepped interventions increase in intensity over time and are purposively designed to address prevailing barriers in the target population in order to positively affect the desired outcome.<sup>25,26</sup> An incremental, stepped approach may be the most appropriate and scalable way to improve men’s care in low-resource settings. Men are not homogeneous: some men may require minimal support to engage in care, while others may require extensive

1  
2  
3 support. Stepped interventions allow programs to target the highest-resource interventions to the  
4 minority of men who need them most.  
5  
6  
7

8 The *Identifying efficient linkage strategies for HIV self-testing (IDEaL) Trial* is an individually  
9 randomized control trial aimed to test the impact of various interventions on ART (re-  
10 engagement and six-month retention among men living with HIV who are not currently engaged  
11 in HIV care in Malawi. We will compare a Stepped intervention against Low-Intensity and High-  
12 Intensity interventions to assess the impact of the Stepped intervention on men's use of ART  
13 services over time (see Supporting Information S1).  
14  
15  
16  
17  
18

## 19 **METHODS AND ANALYSIS**

### 20 **Objectives**

21  
22 Our primary objective is to test the effect of a male-specific, Stepped intervention on men's 6-  
23 month retention in ART care compared to male-specific Low-Intensity and High-Intensity  
24 interventions (retention is defined as <28-days late for their ART appointment). Secondary  
25 objectives are to understand the impact of a Stepped intervention on: (1) ART initiation; (2) the  
26 presence of adverse events (i.e., unwanted disclosure, end of relationship, or intimate partner  
27 violence (IPV)); (3) intervention acceptability; and (4) cost-effectiveness.  
28  
29  
30  
31  
32  
33  
34  
35

### 36 **Trial Design**

37  
38 IDEaL is a programmatic, individually randomized, non-blinded, non-inferiority controlled trial  
39 design. We will recruit men from 15 high-burden health facilities in Malawi using medical chart  
40 reviews to identify men who are living with HIV but not engaged in HIV care.  
41  
42  
43  
44

### 45 **Randomization**

46 Individual men will be block randomized by a biostatistician using a 1:1:1 ratio to either the  
47 Stepped, Low-Intensity, or High-Intensity study arm using a computer-generated program.  
48 Participants will be randomized in blocks of 3 and 6, depending on the number of men available  
49 for recruitment at each facility. After enrolling in the trial and completing a baseline survey, men  
50 will be assigned to a study ID based on the randomization list. Study ID's will be linked with the  
51 pre-assigned blocked randomization and pre-loaded into the tablet device, but will be unknown  
52  
53  
54  
55  
56  
57  
58  
59  
60

1  
2  
3 to the study staff until survey and randomization modules are completed and saved, ensuring  
4 randomization cannot be manipulated by the study staff. Once finalized, the randomization  
5 results will appear on the tablet device as a picture, and will be shown to the participant to  
6 maximize transparency and study buy-in.  
7  
8  
9

## 10 11 12 **Interventions**

13 The effectiveness of the Stepped Intervention will be compared to a Low-Intensity Intervention  
14 (one time male-specific counseling + facility navigation) and to a High-Intensity Intervention  
15 (outside-facility ART initiation + male-specific counseling + facility navigation for follow-up  
16 ART visits). Across all arms, men who do not (re-)engage in ART will continue receiving  
17 follow-up visits for up to three months, depending on preferences of the client. The number of  
18 intervention visits delivered for each participant will be documented.  
19  
20  
21  
22  
23

### 24 25 26 ***Arm 1: Stepped Arm***

27 The Stepped arm will build in intensity over time for those who have not (re-)engaged in care  
28 14-days after enrollment, or who do not return for their first ART follow-up appointment after  
29 (re-)engagement (see Fig 1). Individuals will move to the next “step” every 2-weeks, moving  
30 from the lightest to the most intensive interventions over the course of X weeks until (re-  
31 )engagement has been achieved (as defined by starting or restarting ART). The Stepped arm  
32 includes the following steps:  
33  
34  
35  
36  
37  
38

39 *Step 1: Male-Specific Counseling + Facility Navigation:* Participants will be traced in the  
40 community and receive a one-time, one-on-one, intensive counseling session in the community by  
41 a lower-level cadre male HIV counselor (called Patient Supporter in Malawi) using a male-specific  
42 counseling curriculum developed specifically for this trial.  
43  
44  
45  
46  
47

48 Ministry of Health counseling materials will be adapted to develop the male-specific counseling  
49 curriculum, based on formative in-depth interviews, focus group discussions, and a systematic  
50 literature review. Adaptations will include exploring topics of most concern to men in Malawi (i.e.,  
51 earning money while HIV-positive, side effects and concerns regarding lifelong medication, ART  
52 as a tool to provide and care for family, etc.). The materials will also include language and pictures  
53  
54  
55  
56  
57  
58  
59  
60

1  
2  
3 that resonate with men (i.e., emphasizing how HIV and HIV services interact with men's strength,  
4 responsibility, planning for the future), and male-specific case studies of challenges men face and  
5 how they overcome them. The adapted male-specific counseling curriculum will be developed into  
6 a standardized counseling flip chart to promote consistent and accurate implementation of the  
7 intervention.  
8  
9  
10  
11  
12

13 Men who wish to (re-)engage in care will be provided with facility navigation, including being  
14 escorted to the facility (if desired) and being oriented to the ART clinic within the health facility  
15 by the same counselor who delivers the intervention. Men will access all ART clinical services at  
16 a health facility of their choice (but counseling described above will be provided in the  
17 community).  
18  
19  
20  
21  
22  
23

24 *Step 2: Ongoing Motivational Interviewing + Facility Navigation:* Men who do not (re-)engage in  
25 care (either have not engaged ART within 14 days of enrollment or do (re-)engage ART but are  
26  $\geq 7$ -days late for a follow-up appointment) will move to the next 'step' of the intervention, which  
27 adds ongoing motivational interviewing to their package of activities. Motivational interviewing  
28 is a validated form of counseling aimed to help individuals identify barriers to a desired outcome  
29 and develop personalized solutions.<sup>27</sup> Mentors will work with participants to: (1) build self-  
30 efficacy, (2) identify internal motivations for the desired behavior, and (3) establish strategies and  
31 short- and long-term goals needed to reach ART initiation and retention. A male mentor  
32 specifically trained in motivational interviewing will provide ongoing, one-on-one in-depth  
33 counseling, motivational interviewing, and general "check-ins" approximately twice within a two-  
34 week period. The mentor will not necessarily be HIV-positive (unlike other mentorship models)  
35 as the Malawi Ministry of Health has moved away from HIV-positive peer mentor cadres.  
36 However, they will be experienced in HIV counseling and trained on male-specific needs.  
37 Motivational interviewing will take place in a location preferred by the participant, likely in the  
38 community. Participants who choose to (re)engage in care will be given facility navigation.  
39  
40  
41  
42  
43  
44  
45  
46  
47  
48  
49  
50

51 *Step 3: Outside-facility ART initiation + male-specific counseling + facility navigation:* Men who  
52 are not engaged after Step 2 (either have not engaged in ART care within 14 days of receiving the  
53 first motivational interviewing or have engaged but are  $\geq 7$ -days late for a follow-up ART  
54  
55  
56  
57  
58  
59  
60

1  
2  
3 appointment) will be offered outside-facility ART initiation by a male nurse affiliated with the  
4 nearest public health facility. The nurse will meet the participant at a convenient and private  
5 location of his choice. Outside-facility ART will be male-friendly, including components like early  
6 hours and convenient locations.  
7  
8  
9

10  
11 The nurse will provide client-centered counseling by reviewing key points from male-specific  
12 counseling that are most relevant to the individual, and conduct WHO staging. Individuals  
13 classified as WHO Stage 3 or 4 will not be eligible for outside-facility ART and will be escorted  
14 to the nearest public health facility for additional services. Participants classified as WHO Stage 1  
15 or 2 will be given ART for same day initiation. The nurse will schedule a 4-week follow-up ART  
16 refill appointment at the health facility of the man's choice. At the time of the follow-up  
17 appointment, the nurse will provide facility navigation to facilitate a positive experience engaging  
18 in or returning to care and serve as the ART provider for this appointment to facilitate service  
19 continuity and familiarity.  
20  
21  
22  
23  
24  
25  
26  
27  
28

29 ***Arm 2: Low-Intensity Arm: Male-specific counseling + facility navigation***

30  
31 Participants randomized to the Low-Intensity Arm will be traced in the community and receive a  
32 one-time, one-on-one, intensive counseling session in the community by a lower-level cadre  
33 male HIV counselor. The counseling session will use the same male-specific counseling  
34 curriculum described in Step 1 of the Stepped Arm. For men who do not (re-)engage in care,  
35 follow-up counseling will be offered approximately every two weeks until individuals engage in  
36 care or inform the counselor that they do not wish to be contacted. Those who choose to engage  
37 in ART following male-specific counseling will be given facility navigation for their first ART  
38 appointment.  
39  
40  
41  
42  
43  
44  
45

46 ***Arm 3: High-Intensity Arm: Outside-facility ART initiation + male-specific counseling +***  
47 ***facility navigation***

48  
49 The High-Intensity Arm will offer the male-specific counseling described above, outside-facility  
50 ART initiation, and facility navigation for their 4-week follow-up appointment. After receiving  
51 male-specific counseling, participants interested in outside-facility ART initiation will be referred  
52 to a male study nurse who will meet men one-on-one at convenient times and locations. Those  
53  
54  
55  
56  
57  
58  
59  
60

1  
2  
3 who decline outside facility ART initiation will be referred immediately to the nearest health  
4 facility and receive facility navigation on a day and time that is convenient for them. For outside-  
5 facility ART, the nurse will provide client-centered counseling, reviewing key points from male-  
6 specific counseling that are most relevant and/or of greatest concern to the individual, conduct  
7 WHO staging, and for those in WHO Stage 1 or 2, provide same day ART initiation (as described  
8 in the Stepped Arm). The nurse will provide facility navigation for the 4-week ART refill  
9 appointment. Men who do not (re-)engage in care will be offered biweekly follow-up counseling  
10 at times and intervals determined by participants' preferences until they engage in care or inform  
11 the nurse that they no longer wish to be contacted.  
12  
13  
14  
15  
16  
17  
18  
19

20 [Figure 1 here]  
21  
22  
23

### 24 **Trial setting**

25 The study will take place in central and southern Malawi. Malawi has an HIV prevalence of 9.6%<sup>28</sup>  
26 and, of the estimated 330,000 men living with HIV in the country, 54,500 are not in care.<sup>29</sup> Men  
27 in Malawi live in primarily rural settings, are self-employed, subsistence farmers, the minority  
28 have regular access to a private phone, and most are highly mobile.<sup>30,31</sup>  
29  
30  
31  
32  
33

### 34 **Population**

35 We will recruit men from 15 high-burden health facilities in Malawi, using medical chart reviews  
36 to identify men living with HIV who are not engaged in HIV care. Study facilities will vary by  
37 facility type (hospital/health center), management (public/mission), location (rural/urban), and  
38 region (central/southern Malawi).  
39  
40  
41  
42  
43

44 Eligibility criteria for men include: (1)  $\geq 15$  years of age; (2) live in facility catchment area; and (3)  
45 tested HIV-positive and either (a) self-report having not yet initiated ART within 7-days of testing  
46 HIV-positive, (b) initiated ART but are at risk of immediate default (i.e.,  $\geq 7$ -days late for their 30-  
47 day ART refill appointment), or (c) initiated ART and attended their first refill appointment but  
48 later defaulted (i.e.  $\geq 28$ -days late to care). For those who never initiated ART and do not have  
49 proof of a confirmatory HIV test, study staff will offer an HIV self-test kit prior to enrollment, to  
50  
51  
52  
53  
54  
55  
56  
57  
58  
59

1  
2  
3 confirm a positive HIV status. Those who choose to initiate ART will receive the standard  
4 Determine and Unigold confirmatory tests prior to ART initiation, following routine care.  
5  
6  
7

### 8 **Study outcomes**

9  
10 The primary outcome is the proportion of men who are retained in ART care 6-months after (re-)  
11 engagement. Secondary outcomes include: (1) ART initiation; (2) adverse events experienced by  
12 men or their female partners (i.e., unwanted disclosure, end of relationship, or intimate partner  
13 violence(IPV); (3) intervention acceptability; and (4) cost-effectiveness. ART retention outcomes  
14 will be measured through medical chart reviews, while secondary outcomes will be measured  
15 through self-reports. Process outcomes include: (1) the proportion of men who were successfully  
16 traced; (2) the proportion of eligible men who consented to participate; (3) men's experience  
17 with the intervention; and (4) the quality of the intervention.  
18  
19  
20  
21  
22  
23  
24  
25

### 26 **Sample size considerations**

27 We powered the study to detect differences in 6-month retention between Stepped and Low-  
28 Intensity Arms, and the Stepped and High-Intensity Arms. Based on previous trials, we assumed  
29 that 40% of men in the Low-Intensity Arm, 60% in the Stepped Arm, and 80% in the High-  
30 Intensity Arm will engage in ART and be retained at 6-months. Any man lost to follow-up will be  
31 treated as a failure for the outcome evaluation. With 181 men per arm and 20% loss to follow-up  
32 from the study in all arms, the power for detecting the specified difference between Stepped and  
33 Low Intensity arms will be 0.8 and the power to detect the specified difference between Stepped  
34 and High-Intensity arms will be >0.99, taking into account that two comparisons are made. The  
35 calculation is based on asymptotic normality of log odds ratio.<sup>32</sup> We need to enroll and randomize  
36 181 men per arm (a total of 543 men living with HIV).  
37  
38  
39  
40  
41  
42  
43  
44  
45

### 46 **Data Collection**

47 Study recruitment, enrollment, and data collection will be conducted by study staff, who are  
48 distinct from local HCWs implementing the interventions.  
49  
50  
51  
52

### 53 **Recruitment**



1  
2  
3 Men will be identified through both medical register reviews and in-person recruitment at  
4 participating health facilities. Various medical charts will be reviewed to identify different types  
5 of eligible men: HIV testing and counseling (HTC) to identify men who tested HIV positive but  
6 never initiated ART; client follow-up registers to identify those who initiated but never returned  
7 for their first ART appointment, or those who defaulted from care; and index counseling and  
8 testing (ICT) registers to identify male partners of female ART clients (Figure 2). In-person  
9 recruitment will involve screening men at outpatient departments (OPD) because our previous  
10 research has found that men in Malawi frequent OPD settings for health needs,<sup>12</sup> and our  
11 formative work suggests that men who disengage from ART services still frequent the OPD for  
12 care. In-person recruitment will be used for all client types.  
13  
14  
15  
16  
17  
18  
19  
20  
21

22 [Figure 2 here]  
23  
24

### 25 ***Tracing and Eligibility Screening***

26 Study staff will trace potential participants identified through medical chart reviews via phone (if  
27 available) or home visits based on tracing data provided in medical documentation. All potential  
28 participants will be traced up to three times before being considered lost to follow-up. All  
29 screening and enrollment processes will take place in-person.  
30  
31  
32  
33  
34  
35

### 36 ***Consent, Enrollment, and Baseline Survey***

37 Men who are eligible for the study will complete written informed consent and complete a  
38 baseline survey immediately following enrollment. The baseline survey will collect data on key  
39 demographic variables (marital status, number of children, employment, self-rated health) and  
40 previous engagement with HIV and non-HIV health services. All surveys will be conducted in  
41 the local language (Chichewa) by trained study staff using electronic tablets. Surveys will be  
42 programmed using SurveyCTO software (<http://www.surveyccto.com>).  
43  
44  
45  
46  
47  
48  
49

### 50 ***Follow-Up Data***

51 Study staff will administer follow-up surveys at 2- and 4-months after enrollment. Follow-up  
52 surveys will measure exposure to (and acceptability of) the interventions, changes in key  
53 demographics since enrollment (i.e., marital status, number of children, employment, self-rated  
54  
55  
56  
57  
58  
59  
60

1  
2  
3 health), any adverse events since enrollment (i.e., unwanted status disclosure, termination of  
4 relationship due to the intervention), and use of ART services. The location and specific time of  
5 the follow-up survey will be based on participant preference.  
6  
7  
8  
9

10 Medical chart reviews will be conducted to assess men's engagement with ART services 6-  
11 months after study enrollment. Individuals without a medical chart outcome will be followed-up  
12 in person and their health passport, a pocket medical record where providers record data during  
13 health visits, will be reviewed to collect the ART outcome. Men who cannot be reached or are  
14 lost to follow-up in any arm will be counted as failures for that specific ART outcome of interest:  
15 (re-)engagement or 6-month retention).  
16  
17  
18  
19  
20  
21

### 22 **Patient and Public Involvement**

23 Extensive formative work informed the development of the study protocol including in-depth  
24 interviews, focus group discussions, and a systematic literature review. The study protocol and  
25 tools were presented to Ministry of Health, national stakeholders and implementing partners (see  
26 Supporting Information S2).  
27  
28  
29  
30  
31

### 32 **Cost data**

33 The average cost per successful outcome (6-month retention) will be calculated and compared  
34 across arms incrementally. We will use micro-costing methods by creating an inventory of the  
35 resources used to achieve the observed study outcomes including: (1) standard counseling  
36 interactions (staff cadre, training received, duration of interaction and distance from facility  
37 travelled where applicable); (2) motivational interviewing interactions (staff cadre, training  
38 received, duration of interaction and distance from facility travelled where applicable); (3)  
39 provider interactions (staff cadre, training received, duration of interaction and distance from  
40 facility travelled where applicable); and (4) cost of reminder messages sent, when messages are  
41 delivered telephonically instead of in person. For each study patient, the quantity (number of  
42 units) of resources used will be determined. Costs will be measured from the health care provider  
43 perspective. Unit costs of resources, which are not human subject data, will be obtained from  
44 external suppliers and the health facilities' finance and procurement records and multiplied by  
45 the resource usage data to provide an average cost per study patient in each study arm. A cost-  
46  
47  
48  
49  
50  
51  
52  
53  
54  
55  
56  
57  
58  
59  
60

effectiveness analysis will be conducted by dividing the incremental cost between two arms by the incremental effectiveness (number of people retained at 6-months) in the respective arms.

### **Analysis plan**

Data analysis will be conducted in R: A Language and Environment for Statistical Computing (R Foundation for Statistical Computing). We will use the Consolidated Standards of Reporting Trials (CONSORT) standards for reporting trial outcomes.<sup>33</sup> Using an intention-to-treat analysis, all randomized men will be included in the analysis of the primary outcome; men with missing outcome assessment due to loss to follow-up will be treated as outcome failures. We will calculate descriptive statistics, including mean, standard deviation, range, and frequency distributions for the demographic characteristics and study outcomes by study arm. The primary outcome and all other binary outcomes will be analyzed by logistic regression models with key sociodemographic variables included as covariates (i.e., age and marital status). The intervention effects will be tested by pairwise Wald tests with Bonferroni adjustment. Confidence intervals for intervention effects will be calculated by profile likelihood methods, also with Bonferroni adjustment. To address the secondary objectives, more elaborate logistic regression models will be built for each of the binary outcomes with available individual-, community-, and facility-level factors included as covariates in addition to the intervention status.

### ***Nested studies***

A series of nested, mixed methods studies will be conducted to identify factors associated with ART engagement within each intervention arm, and to explore the implementation and acceptability of interventions.

### ***Qualitative data collection***

We will conduct in-depth interviews with a random subset of 120 male participants throughout the study period in order to assess characteristics of men who fail to engage in care, contextualize decisions around ART initiation and retention, and identify additional strategies that may be needed for men to successfully engage and be retained in ART programs.

1  
2  
3 Interviews will be conducted by a trained male interviewer. Interviews will be digitally recorded,  
4 transcribed, and translated into English for analysis. Investigators will pilot a codebook by  
5 independently reading and coding a randomly-selected subset of transcripts. Through an iterative  
6 consultative process, each investigator will revise their respective codebook until there is high  
7 interrater reliability among the group. All transcripts will be coded in Atlas.ti v8.3 using constant  
8 comparison, and coding disagreements will be resolved by consensus.  
9  
10  
11  
12  
13  
14

### 15 *Implementation Log Sheet*

16 During the course of the intervention, HCWs will keep daily logs as one of the study monitoring  
17 and evaluation tools to assess the implementation of the intervention for each participant.  
18 Primary events to be recorded in the daily logs are: (1) unable to reach participant (and reason);  
19 (2) contacted participant; (3) intervention provided (and notes about the challenges and successes  
20 of the interaction); and (4) other comments relevant to intervention implementation. Each event  
21 will be recorded with a corresponding date. Logs will be digitized in English. Findings may  
22 influence how similar interventions are implemented in the future.  
23  
24  
25  
26  
27  
28  
29

### 30 **Ethics and Dissemination**

31 The IDEaL trial is registered with ClinicalTrials.gov as NCT05137210. The protocol was  
32 approved by the Institutional Review Board of the University of California, Los Angeles and the  
33 National Health Sciences Research Council in Malawi. Study findings will be disseminated  
34 through peer-reviewed journal articles, national and international conference presentations, and  
35 meetings with Malawi Ministry of Health, facility, and community stakeholders.  
36  
37  
38  
39  
40  
41  
42

### 43 **DISCUSSION**

44 Studies have reported poorer outcomes for HIV testing, treatment initiation, and treatment  
45 adherence in men compared to women<sup>2</sup> for over a decade.<sup>34,35</sup> Men are often portrayed as  
46 difficult, hard-to-reach, and actively avoiding health facilities. In IDEaL, we aim to investigate  
47 whether men really are hard-to-reach or, will men engage in care when services are offered in  
48 ways that are accessible to them and resonate with their needs, as growing evidence suggests.<sup>12</sup>  
49 We propose to test a Stepped intervention that increases in intensity over time against Low- and  
50  
51  
52  
53  
54  
55  
56  
57  
58  
59  
60

1  
2  
3 High-intensity interventions – all tailored to men – to identify the most cost effective strategy to  
4 (re-)engage men in HIV treatment services in Malawi.  
5  
6  
7

8 IDEaL is different from other ART engagement and re-engagement interventions in several  
9 important ways. First, we will enroll men living with HIV across the treatment cascade,  
10 including those who have never initiated ART, those who are at risk of immediate default after  
11 initiation, and those who have been in care but subsequently default. Formative research suggests  
12 that barriers to ART initiation and re-initiation may be similar,<sup>36</sup> however most interventions  
13 focus specifically on either first-time initiation or re-engagement, but not both. Our study will  
14 assess if one overarching program can improve men's engagement across the treatment cascade,  
15 regardless of whether they are starting ART for the first time or returning to care after a period of  
16 disengagement. One overarching intervention may be more scalable than multiple, separate  
17 interventions across the cascade. Second, we tailor interventions to men's unique needs and  
18 motivations, based on extensive formative work. While innovative interventions for men are  
19 underway,<sup>19-21</sup> few have rigorously tested the impact of male-tailored interventions on ART  
20 engagement.<sup>37</sup>  
21  
22  
23  
24  
25  
26  
27  
28  
29  
30  
31

32 Our study will measure adverse events including unwanted disclosure, end of a relationship,  
33 and/or intimate partner violence (IPV). We will also measure female partner perceptions of the  
34 feasibility and acceptability of a male-only intervention, and any unintended or adverse events  
35 such as IPV. Understanding these events will be critical to evaluating the feasibility of scale-up  
36 should one or more of the approaches prove effective.  
37  
38  
39  
40  
41  
42

43 Finally, we will test a Stepped intervention that builds in intensity over time until men (re-)  
44 engage in care. This approach allows men who are ready to (re-)engage to do so at minimal cost  
45 to the health system, while those who need additional support can receive more resource-  
46 intensive interventions to support their ART engagement.<sup>25</sup> Stepped interventions have been  
47 effective in other settings and can address multiple barriers faced by the target population with  
48 minimal cost.<sup>25,26</sup> Findings from IDEaL will provide crucial knowledge to how best men can be  
49 reached and can inform intervention scale-up.  
50  
51  
52  
53  
54  
55  
56  
57  
58  
59  
60

1  
2  
3 **Contributorship statement:** KD and AC conceptualized the study. KD is responsible for  
4 funding acquisition. KD, KB, JH, KP, BN, RH and AC developed study protocol and materials.  
5 JH, KB, KP, and EC will implement the study. KD, MK, KB, TC, BN, LL, TC, and AC  
6 developed the analysis plan and KD, MK, KB, and AC will analyze the data. KD and EC wrote  
7 the first draft and KB, JH, KP, BN, LL, RH, SP, EC, RH, TC, and AC edited following drafts.  
8 All authors have read and approved the final manuscript.  
9  
10  
11  
12  
13  
14

15 **Competing interests:** The authors declare that they have no competing interests.  
16

17 **Funding:** The work was supported by the Bill and Melinda Gates Foundation grant number  
18 INV-001423. KD was supported by National Institute of Mental Health of the National Institutes  
19 of Health grant number R01-MH122308, Fogarty International grant number K01-TW011484-01  
20 and UCLA GSTTP (grant number N/A). LL was supported by the National Institute of Mental  
21 Health of the National Institutes of Health under grant number K01MH119923. The content is  
22 solely the responsibility of the authors and does not necessarily represent the official views of the  
23 National Institutes of Health.  
24  
25  
26  
27  
28  
29  
30

31 **Acknowledgements:** We wish to thank the Malawi Ministry of Health for their support of this  
32 trial. We would also like to acknowledge Joep van Oosterhout, Misheck Mphande, Isabella  
33 Robson, Thoko Banda, Peter Mwamlima, and Eric Lungu for their contributions to protocol  
34 development and for their support of study implementation, and to Hannah Whitehead for  
35 assistance with manuscript development and submission.  
36  
37  
38  
39  
40  
41

## 42 REFERENCES

- 43 1. Cornell M, Majola M, Johnson LF, Dubula-Majola V. HIV services in sub-Saharan  
44 Africa: the greatest gap is men. *The Lancet*. 2021;397(10290):2130-2132.
- 45 2. UNAIDS 'AIDSinfo' (accessed September 2021).
- 46 3. Ehrenkranz P, Rosen S, Boulle A, et al. The revolving door of HIV care: Revising the  
47 service delivery cascade to achieve the UNAIDS 95-95-95 goals. *PLoS Medicine*.  
48 2021;18(5):e1003651.
- 49 4. Grimsrud A, Wilkinson L, Eshun-Wilson I, Holmes C, Sikazwe I, Katz IT.  
50 Understanding engagement in HIV programmes: how health services can adapt to ensure  
51 no one is left behind. *Current HIV/AIDS Reports*. 2020:1-9.  
52  
53  
54  
55  
56  
57  
58  
59  
60



5. Lopez-Varela E, Augusto O, Fuente-Soro L, et al. Quantifying the gender gap in the HIV care cascade in southern Mozambique: We are missing the men. *PLOS ONE*. 2021;16(2):e0245461.
6. Kranzer K, Lewis JJ, Ford N, et al. Treatment interruption in a primary care antiretroviral therapy program in South Africa: cohort analysis of trends and risk factors. *Journal of acquired immune deficiency syndromes (1999)*. 2010;55(3):e17-e23.
7. Mody A, Eshun-Wilson I, Sikombe K, et al. Longitudinal engagement trajectories and risk of death among new ART starters in Zambia: A group-based multi-trajectory analysis. *PLoS medicine*. 2019;16(10):e1002959-e1002959.
8. Gosset A, Protopopescu C, Larmarange J, et al. Retention in Care Trajectories of HIV-Positive Individuals Participating in a Universal Test-and-Treat Program in Rural South Africa (ANRS 12249 TasP Trial). *J Acquir Immune Defic Syndr*. 2019;80(4):375-385.
9. Esacove AW. Good sex/bad sex: the individualised focus of US HIV prevention policy in sub-Saharan Africa, 1995–2005. *Sociology of health & illness*. 2013;35(1):33-48.
10. Poulin M, Dovel K, Watkins SC. Men with money and the “vulnerable women” client category in an AIDS epidemic. *World Development*. 2016;85:16-30.
11. Chamberlin S, Mphande M, Phiri K, Kalande P, Dovel K. How HIV Clients Find Their Way Back to the ART Clinic: A Qualitative Study of Disengagement and Re-engagement with HIV Care in Malawi. *AIDS and Behavior*. 2021:1-12.
12. Dovel K, Balakasi K, Gupta S, et al. Frequency of visits to health facilities and HIV services offered to men, Malawi. *Bulletin of the World Health Organization*. 2021;99(9):618.
13. Dovel K, Dworkin SL, Cornell M, Coates TJ, Yeatman S. Gendered health institutions: examining the organization of health services and men’s use of HIV testing in Malawi. *Journal of the International AIDS Society*. 2020;23:e25517.
14. Yeatman S, Chamberlin S, Dovel K. Women's (health) work: A population-based, cross-sectional study of gender differences in time spent seeking health care in Malawi. *PLoS One*. 2018;13(12):e0209586.
15. Colvin CJ. Strategies for engaging men in HIV services. *The Lancet HIV*. 2019;6(3):e191-e200.
16. Phiri K, McBride K, Moucheraud C, et al. Community and health system factors associated with antiretroviral therapy initiation among men and women in Malawi: a mixed methods study exploring gender-specific barriers to care. *International health*. 2021;13(3):253-261.
17. Ware NC, Wyatt MA, Geng EH, et al. Toward an understanding of disengagement from HIV treatment and care in sub-Saharan Africa: a qualitative study. *PLoS medicine*. 2013;10(1):e1001369.
18. Layer EH, Brahmabhatt H, Beckham SW, et al. “I Pray That They Accept Me Without Scolding:” Experiences with Disengagement and Re-Engagement in HIV Care and Treatment Services in Tanzania. *AIDS Patient Care and STDs*. 2014;28(9):483-488.
19. Bell J, Sharma S, Malone S, et al. Targeting interventions for HIV testing and treatment uptake: An attitudinal and behavioural segmentation of men aged 20–34 in KwaZulu-Natal and Mpumalanga, South Africa. *PloS one*. 2021;16(3):e0247483.
20. van Rooyen H, Makusha T, Joseph P, et al. Zwakala Ndoda: a cluster and individually randomized trial aimed at improving testing, linkage, and adherence to treatment for hard-to reach men in KwaZulu-Natal, South Africa. *Trials*. 2019;20(1):1-14.

21. Coalition M. *MenStar Strategy*. 2020.
22. Grimsrud A, Bygrave H, Doherty M, et al. Reimagining HIV service delivery: the role of differentiated care from prevention to suppression. *Journal of the International AIDS Society*. 2016;19(1):21484-21484.
23. Duncombe C, Rosenblum S, Hellmann N, et al. Reframing HIV care: putting people at the centre of antiretroviral delivery. *Tropical Medicine & International Health*. 2015;20(4):430-447.
24. Hagey JM, Li X, Barr-Walker J, et al. Differentiated HIV care in sub-Saharan Africa: a scoping review to inform antiretroviral therapy provision for stable HIV-infected individuals in Kenya. *AIDS Care*. 2018;30(12):1477-1487.
25. Bower P, Gilbody S. Stepped care in psychological therapies: access, effectiveness and efficiency: narrative literature review. *The British Journal of Psychiatry*. 2005;186(1):11-17.
26. McNairy ML, Lamb MR, Gachuhi AB, et al. Effectiveness of a combination strategy for linkage and retention in adult HIV care in Swaziland: The Link4Health cluster randomized trial. *PLoS medicine*. 2017;14(11):e1002420-e1002420.
27. Rollnick S, Miller WR. What is Motivational Interviewing? *Behavioural and Cognitive Psychotherapy*. 1995;23(4):325-334.
28. UNAIDS. Focus on: Malawi. 2017; [https://www.unaids.org/en/20190402\\_country\\_focus\\_Malawi](https://www.unaids.org/en/20190402_country_focus_Malawi). Accessed October 12, 2021.
29. UNAIDS. Country factsheets: Malawi 2020. 2020; <https://www.unaids.org/en/regionscountries/countries/malawi>. Accessed October, 2021.
30. Feldacker C, Emch M, Ennett S. The who and where of HIV in rural Malawi: Exploring the effects of person and place on individual HIV status. *Health Place*. 2010;16(5):996-1006.
31. Mandiwa C, Namondwe B. Uptake and correlates of HIV testing among men in Malawi: evidence from a national population-based household survey. *BMC Health Services Research*. 2019;19(1):203.
32. Jewell NP. Section 7.1. In: *Statistics for Epidemiology*. Chapman and Hall/CRC; 2004.
33. Schulz KF, Altman DG, Moher D. CONSORT 2010 Statement: updated guidelines for reporting parallel group randomised trials. *BMJ*. 2010;340:c332.
34. Higgins JA, Hoffman S, Dworkin SL. Rethinking gender, heterosexual men, and women's vulnerability to HIV/AIDS. *American journal of public health*. 2010;100(3):435-445.
35. Braitstein P, Boulle A, Nash D, et al. Gender and the use of antiretroviral treatment in resource-constrained settings: findings from a multicenter collaboration. *Journal of women's health*. 2008;17(1):47-55.
36. Coursey K, Kalande P, Phiri K, Chamberlin S, Coates T, Dovel K. Developing intervention strategies to improve ART program initiation and retention among HIV-positive men in Malawi.
37. Kusemererwa S, Akena D, Nakanjako D, et al. Strategies for retention of heterosexual men in HIV care in sub-Saharan Africa: A systematic review. *PloS one*. 2021;16(2):e0246471.



1  
2  
3  
4  
5  
6  
7  
8  
9  
10  
11  
12  
13  
14  
15  
16  
17  
18  
19  
20  
21  
22  
23  
24  
25  
26  
27  
28  
29  
30  
31  
32  
33  
34  
35  
36  
37  
38  
39  
40  
41  
42  
43  
44  
45  
46  
47  
48  
49  
50  
51  
52  
53  
54  
55  
56  
57  
58  
59  
60

**FIGURE LEGEND**

Figure 1: Trial Design

Figure 2: Recruitment sources and ART disengagement criteria by recruitment type

For peer review only

Figure 1: Trial Design

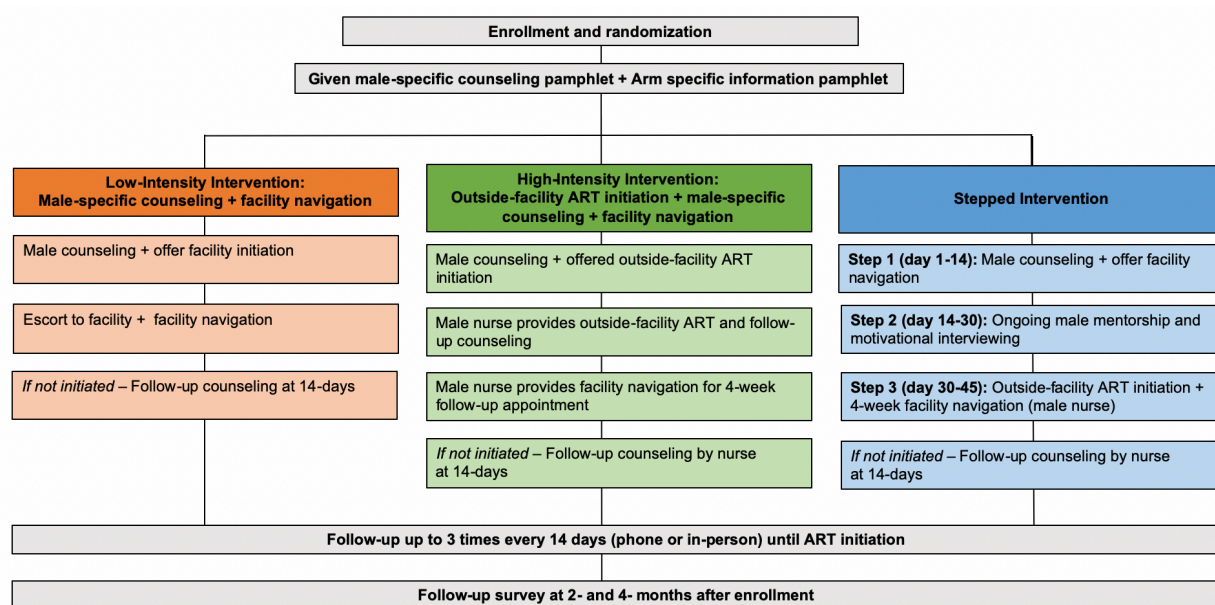

1  
2  
3  
4  
5  
6  
7  
8  
9  
10  
11  
12  
13  
14  
15  
16  
17  
18  
19  
20  
21  
22  
23  
24  
25  
26  
27  
28  
29  
30  
31  
32  
33  
34  
35  
36  
37  
38  
39  
40  
41  
42  
43  
44  
45  
46  
47  
48  
49  
50  
51  
52  
53  
54  
55  
56  
57  
58  
59  
60

**Fig 2. Recruitment sources and ART disengagement criteria by recruitment type**

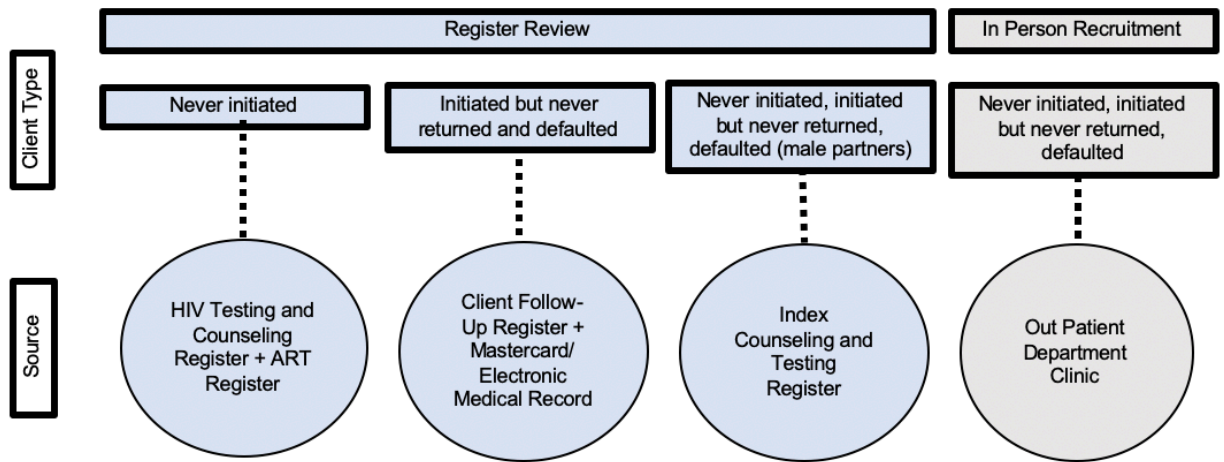

peer review only

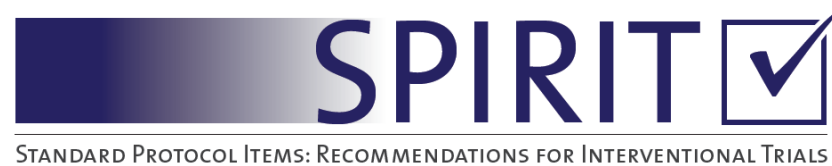

SPIRIT 2013 Checklist: Recommended items to address in a clinical trial protocol and related documents\*

| Section/item                      | Item No | Description                                                                                                                                                                                                                                                                              | Addressed on page number |
|-----------------------------------|---------|------------------------------------------------------------------------------------------------------------------------------------------------------------------------------------------------------------------------------------------------------------------------------------------|--------------------------|
| <b>Administrative information</b> |         |                                                                                                                                                                                                                                                                                          |                          |
| Title                             | 1       | Descriptive title identifying the study design, population, interventions, and, if applicable, trial acronym                                                                                                                                                                             | ___ 1 ___                |
| Trial registration                | 2a      | Trial identifier and registry name. If not yet registered, name of intended registry                                                                                                                                                                                                     | ___ 1, 15 ___            |
|                                   | 2b      | All items from the World Health Organization Trial Registration Data Set                                                                                                                                                                                                                 | ___ n/a ___              |
| Protocol version                  | 3       | Date and version identifier                                                                                                                                                                                                                                                              | ___ 2 ___                |
| Funding                           | 4       | Sources and types of financial, material, and other support                                                                                                                                                                                                                              | ___ 19 ___               |
| Roles and responsibilities        | 5a      | Names, affiliations, and roles of protocol contributors                                                                                                                                                                                                                                  | ___ 18-19 ___            |
|                                   | 5b      | Name and contact information for the trial sponsor                                                                                                                                                                                                                                       | ___ 19 ___               |
|                                   | 5c      | Role of study sponsor and funders, if any, in study design; collection, management, analysis, and interpretation of data; writing of the report; and the decision to submit the report for publication, including whether they will have ultimate authority over any of these activities | ___ 19 ___               |
|                                   | 5d      | Composition, roles, and responsibilities of the coordinating centre, steering committee, endpoint adjudication committee, data management team, and other individuals or groups overseeing the trial, if applicable (see Item 21a for data monitoring committee)                         | ___ n/a ___              |

|    |                                                           |     |                                                                                                               |                      |
|----|-----------------------------------------------------------|-----|---------------------------------------------------------------------------------------------------------------|----------------------|
| 1  | <b>Introduction</b>                                       |     |                                                                                                               |                      |
| 2  |                                                           |     |                                                                                                               |                      |
| 3  | Background and                                            | 6a  | Description of research question and justification for undertaking the trial, including summary of relevant   | ___ 4-5 ___          |
| 4  | rationale                                                 |     | studies (published and unpublished) examining benefits and harms for each intervention                        |                      |
| 5  |                                                           |     |                                                                                                               |                      |
| 6  |                                                           | 6b  | Explanation for choice of comparators                                                                         | ___ ___              |
| 7  |                                                           |     |                                                                                                               |                      |
| 8  | Objectives                                                | 7   | Specific objectives or hypotheses                                                                             | ___ 5 ___            |
| 9  |                                                           |     |                                                                                                               |                      |
| 10 | Trial design                                              | 8   | Description of trial design including type of trial (eg, parallel group, crossover, factorial, single group), |                      |
| 11 |                                                           |     | allocation ratio, and framework (eg, superiority, equivalence, noninferiority, exploratory)                   | ___ 5 ___            |
| 12 |                                                           |     |                                                                                                               |                      |
| 13 |                                                           |     |                                                                                                               |                      |
| 14 | <b>Methods: Participants, interventions, and outcomes</b> |     |                                                                                                               |                      |
| 15 |                                                           |     |                                                                                                               |                      |
| 16 | Study setting                                             | 9   | Description of study settings (eg, community clinic, academic hospital) and list of countries where data will | ___ 9-10 ___         |
| 17 |                                                           |     | be collected. Reference to where list of study sites can be obtained                                          |                      |
| 18 |                                                           |     |                                                                                                               |                      |
| 19 | Eligibility criteria                                      | 10  | Inclusion and exclusion criteria for participants. If applicable, eligibility criteria for study centres and  | ___ 10 ___           |
| 20 |                                                           |     | individuals who will perform the interventions (eg, surgeons, psychotherapists)                               |                      |
| 21 |                                                           |     |                                                                                                               |                      |
| 22 | Interventions                                             | 11a | Interventions for each group with sufficient detail to allow replication, including how and when they will be | ___ 6-9 ___          |
| 23 |                                                           |     | administered                                                                                                  |                      |
| 24 |                                                           |     |                                                                                                               |                      |
| 25 |                                                           | 11b | Criteria for discontinuing or modifying allocated interventions for a given trial participant (eg, drug dose  | ___ n/a ___          |
| 26 |                                                           |     | change in response to harms, participant request, or improving/worsening disease)                             |                      |
| 27 |                                                           |     |                                                                                                               |                      |
| 28 |                                                           | 11c | Strategies to improve adherence to intervention protocols, and any procedures for monitoring adherence        | ___ n/a ___          |
| 29 |                                                           |     | (eg, drug tablet return, laboratory tests)                                                                    |                      |
| 30 |                                                           |     |                                                                                                               |                      |
| 31 |                                                           | 11d | Relevant concomitant care and interventions that are permitted or prohibited during the trial                 | ___ n/a ___          |
| 32 |                                                           |     |                                                                                                               |                      |
| 33 | Outcomes                                                  | 12  | Primary, secondary, and other outcomes, including the specific measurement variable (eg, systolic blood       | ___ 10 ___           |
| 34 |                                                           |     | pressure), analysis metric (eg, change from baseline, final value, time to event), method of aggregation      |                      |
| 35 |                                                           |     | (eg, median, proportion), and time point for each outcome. Explanation of the clinical relevance of chosen    |                      |
| 36 |                                                           |     | efficacy and harm outcomes is strongly recommended                                                            |                      |
| 37 |                                                           |     |                                                                                                               |                      |
| 38 | Participant timeline                                      | 13  | Time schedule of enrolment, interventions (including any run-ins and washouts), assessments, and visits       | ___ 6,8-9, 11-12 ___ |
| 39 |                                                           |     | for participants. A schematic diagram is highly recommended (see Figure)                                      |                      |
| 40 |                                                           |     |                                                                                                               |                      |
| 41 |                                                           |     |                                                                                                               |                      |
| 42 |                                                           |     |                                                                                                               |                      |
| 43 |                                                           |     |                                                                                                               |                      |
| 44 |                                                           |     |                                                                                                               |                      |
| 45 |                                                           |     |                                                                                                               |                      |
| 46 |                                                           |     |                                                                                                               |                      |

|   |             |    |                                                                                                                                                                                       |               |
|---|-------------|----|---------------------------------------------------------------------------------------------------------------------------------------------------------------------------------------|---------------|
| 1 | Sample size | 14 | Estimated number of participants needed to achieve study objectives and how it was determined, including clinical and statistical assumptions supporting any sample size calculations | ___ 10-11 ___ |
| 2 |             |    |                                                                                                                                                                                       |               |
| 3 |             |    |                                                                                                                                                                                       |               |
| 4 | Recruitment | 15 | Strategies for achieving adequate participant enrolment to reach target sample size                                                                                                   | ___ 11-12 ___ |
| 5 |             |    |                                                                                                                                                                                       |               |

### 6 **Methods: Assignment of interventions (for controlled trials)**

#### 7 Allocation:

|    |                    |     |                                                                                                                                                                                                                                                                                                                                                          |             |
|----|--------------------|-----|----------------------------------------------------------------------------------------------------------------------------------------------------------------------------------------------------------------------------------------------------------------------------------------------------------------------------------------------------------|-------------|
| 8  |                    |     |                                                                                                                                                                                                                                                                                                                                                          |             |
| 9  |                    |     |                                                                                                                                                                                                                                                                                                                                                          |             |
| 10 | Sequence           | 16a | Method of generating the allocation sequence (eg, computer-generated random numbers), and list of any factors for stratification. To reduce predictability of a random sequence, details of any planned restriction (eg, blocking) should be provided in a separate document that is unavailable to those who enrol participants or assign interventions | ___ 5-6 ___ |
| 11 | generation         |     |                                                                                                                                                                                                                                                                                                                                                          |             |
| 12 |                    |     |                                                                                                                                                                                                                                                                                                                                                          |             |
| 13 |                    |     |                                                                                                                                                                                                                                                                                                                                                          |             |
| 14 |                    |     |                                                                                                                                                                                                                                                                                                                                                          |             |
| 15 |                    |     |                                                                                                                                                                                                                                                                                                                                                          |             |
| 16 | Allocation         | 16b | Mechanism of implementing the allocation sequence (eg, central telephone; sequentially numbered, opaque, sealed envelopes), describing any steps to conceal the sequence until interventions are assigned                                                                                                                                                | ___ 5-6 ___ |
| 17 | concealment        |     |                                                                                                                                                                                                                                                                                                                                                          |             |
| 18 | mechanism          |     |                                                                                                                                                                                                                                                                                                                                                          |             |
| 19 |                    |     |                                                                                                                                                                                                                                                                                                                                                          |             |
| 20 |                    |     |                                                                                                                                                                                                                                                                                                                                                          |             |
| 21 | Implementation     | 16c | Who will generate the allocation sequence, who will enrol participants, and who will assign participants to interventions                                                                                                                                                                                                                                | ___ 5 ___   |
| 22 |                    |     |                                                                                                                                                                                                                                                                                                                                                          |             |
| 23 |                    |     |                                                                                                                                                                                                                                                                                                                                                          |             |
| 24 | Blinding (masking) | 17a | Who will be blinded after assignment to interventions (eg, trial participants, care providers, outcome assessors, data analysts), and how                                                                                                                                                                                                                | ___ 6 ___   |
| 25 |                    |     |                                                                                                                                                                                                                                                                                                                                                          |             |
| 26 |                    |     |                                                                                                                                                                                                                                                                                                                                                          |             |
| 27 |                    | 17b | If blinded, circumstances under which unblinding is permissible, and procedure for revealing a participant's allocated intervention during the trial                                                                                                                                                                                                     | ___ n/a ___ |
| 28 |                    |     |                                                                                                                                                                                                                                                                                                                                                          |             |
| 29 |                    |     |                                                                                                                                                                                                                                                                                                                                                          |             |
| 30 |                    |     |                                                                                                                                                                                                                                                                                                                                                          |             |

### 31 **Methods: Data collection, management, and analysis**

|    |                 |     |                                                                                                                                                                                                                                                                                                                                                                                                              |            |
|----|-----------------|-----|--------------------------------------------------------------------------------------------------------------------------------------------------------------------------------------------------------------------------------------------------------------------------------------------------------------------------------------------------------------------------------------------------------------|------------|
| 32 |                 |     |                                                                                                                                                                                                                                                                                                                                                                                                              |            |
| 33 | Data collection | 18a | Plans for assessment and collection of outcome, baseline, and other trial data, including any related processes to promote data quality (eg, duplicate measurements, training of assessors) and a description of study instruments (eg, questionnaires, laboratory tests) along with their reliability and validity, if known. Reference to where data collection forms can be found, if not in the protocol | ___ 12 ___ |
| 34 | methods         |     |                                                                                                                                                                                                                                                                                                                                                                                                              |            |
| 35 |                 |     |                                                                                                                                                                                                                                                                                                                                                                                                              |            |
| 36 |                 |     |                                                                                                                                                                                                                                                                                                                                                                                                              |            |
| 37 |                 |     |                                                                                                                                                                                                                                                                                                                                                                                                              |            |
| 38 |                 |     |                                                                                                                                                                                                                                                                                                                                                                                                              |            |
| 39 |                 | 18b | Plans to promote participant retention and complete follow-up, including list of any outcome data to be collected for participants who discontinue or deviate from intervention protocols                                                                                                                                                                                                                    | ___ 12 ___ |
| 40 |                 |     |                                                                                                                                                                                                                                                                                                                                                                                                              |            |
| 41 |                 |     |                                                                                                                                                                                                                                                                                                                                                                                                              |            |
| 42 |                 |     |                                                                                                                                                                                                                                                                                                                                                                                                              |            |

|    |                                 |     |                                                                                                                                                                                                                                                                                                                                       |                   |
|----|---------------------------------|-----|---------------------------------------------------------------------------------------------------------------------------------------------------------------------------------------------------------------------------------------------------------------------------------------------------------------------------------------|-------------------|
| 1  | Data management                 | 19  | Plans for data entry, coding, security, and storage, including any related processes to promote data quality (eg, double data entry; range checks for data values). Reference to where details of data management procedures can be found, if not in the protocol                                                                     | _____ n/a _____   |
| 2  |                                 |     |                                                                                                                                                                                                                                                                                                                                       |                   |
| 3  |                                 |     |                                                                                                                                                                                                                                                                                                                                       |                   |
| 4  |                                 |     |                                                                                                                                                                                                                                                                                                                                       |                   |
| 5  | Statistical methods             | 20a | Statistical methods for analysing primary and secondary outcomes. Reference to where other details of the statistical analysis plan can be found, if not in the protocol                                                                                                                                                              | _____ 13-14 _____ |
| 6  |                                 |     |                                                                                                                                                                                                                                                                                                                                       |                   |
| 7  |                                 |     |                                                                                                                                                                                                                                                                                                                                       |                   |
| 8  |                                 | 20b | Methods for any additional analyses (eg, subgroup and adjusted analyses)                                                                                                                                                                                                                                                              | _____ 13-14 _____ |
| 9  |                                 |     |                                                                                                                                                                                                                                                                                                                                       |                   |
| 10 |                                 | 20c | Definition of analysis population relating to protocol non-adherence (eg, as randomised analysis), and any statistical methods to handle missing data (eg, multiple imputation)                                                                                                                                                       | _____ 13-14 _____ |
| 11 |                                 |     |                                                                                                                                                                                                                                                                                                                                       |                   |
| 12 |                                 |     |                                                                                                                                                                                                                                                                                                                                       |                   |
| 13 |                                 |     |                                                                                                                                                                                                                                                                                                                                       |                   |
| 14 | <b>Methods: Monitoring</b>      |     |                                                                                                                                                                                                                                                                                                                                       |                   |
| 15 |                                 |     |                                                                                                                                                                                                                                                                                                                                       |                   |
| 16 | Data monitoring                 | 21a | Composition of data monitoring committee (DMC); summary of its role and reporting structure; statement of whether it is independent from the sponsor and competing interests; and reference to where further details about its charter can be found, if not in the protocol. Alternatively, an explanation of why a DMC is not needed | _____ n/a _____   |
| 17 |                                 |     |                                                                                                                                                                                                                                                                                                                                       |                   |
| 18 |                                 |     |                                                                                                                                                                                                                                                                                                                                       |                   |
| 19 |                                 |     |                                                                                                                                                                                                                                                                                                                                       |                   |
| 20 |                                 |     |                                                                                                                                                                                                                                                                                                                                       |                   |
| 21 |                                 |     |                                                                                                                                                                                                                                                                                                                                       |                   |
| 22 |                                 | 21b | Description of any interim analyses and stopping guidelines, including who will have access to these interim results and make the final decision to terminate the trial                                                                                                                                                               | _____ n/a _____   |
| 23 |                                 |     |                                                                                                                                                                                                                                                                                                                                       |                   |
| 24 |                                 |     |                                                                                                                                                                                                                                                                                                                                       |                   |
| 25 | Harms                           | 22  | Plans for collecting, assessing, reporting, and managing solicited and spontaneously reported adverse events and other unintended effects of trial interventions or trial conduct                                                                                                                                                     | _____ 12 _____    |
| 26 |                                 |     |                                                                                                                                                                                                                                                                                                                                       |                   |
| 27 |                                 |     |                                                                                                                                                                                                                                                                                                                                       |                   |
| 28 | Auditing                        | 23  | Frequency and procedures for auditing trial conduct, if any, and whether the process will be independent from investigators and the sponsor                                                                                                                                                                                           | _____ n/a _____   |
| 29 |                                 |     |                                                                                                                                                                                                                                                                                                                                       |                   |
| 30 |                                 |     |                                                                                                                                                                                                                                                                                                                                       |                   |
| 31 |                                 |     |                                                                                                                                                                                                                                                                                                                                       |                   |
| 32 | <b>Ethics and dissemination</b> |     |                                                                                                                                                                                                                                                                                                                                       |                   |
| 33 |                                 |     |                                                                                                                                                                                                                                                                                                                                       |                   |
| 34 | Research ethics approval        | 24  | Plans for seeking research ethics committee/institutional review board (REC/IRB) approval                                                                                                                                                                                                                                             | _____ 15 _____    |
| 35 |                                 |     |                                                                                                                                                                                                                                                                                                                                       | _____             |
| 36 |                                 |     |                                                                                                                                                                                                                                                                                                                                       |                   |
| 37 | Protocol amendments             | 25  | Plans for communicating important protocol modifications (eg, changes to eligibility criteria, outcomes, analyses) to relevant parties (eg, investigators, REC/IRBs, trial participants, trial registries, journals, regulators)                                                                                                      | _____ n/a _____   |
| 38 |                                 |     |                                                                                                                                                                                                                                                                                                                                       |                   |
| 39 |                                 |     |                                                                                                                                                                                                                                                                                                                                       |                   |
| 40 |                                 |     |                                                                                                                                                                                                                                                                                                                                       |                   |
| 41 |                                 |     |                                                                                                                                                                                                                                                                                                                                       |                   |
| 42 |                                 |     |                                                                                                                                                                                                                                                                                                                                       |                   |
| 43 |                                 |     |                                                                                                                                                                                                                                                                                                                                       |                   |
| 44 |                                 |     |                                                                                                                                                                                                                                                                                                                                       |                   |
| 45 |                                 |     |                                                                                                                                                                                                                                                                                                                                       |                   |
| 46 |                                 |     |                                                                                                                                                                                                                                                                                                                                       |                   |

|    |                               |     |                                                                                                                                                                                                                                                                                     |       |
|----|-------------------------------|-----|-------------------------------------------------------------------------------------------------------------------------------------------------------------------------------------------------------------------------------------------------------------------------------------|-------|
| 1  | Consent or assent             | 26a | Who will obtain informed consent or assent from potential trial participants or authorised surrogates, and how (see Item 32)                                                                                                                                                        | 12    |
| 2  |                               |     |                                                                                                                                                                                                                                                                                     |       |
| 3  |                               |     |                                                                                                                                                                                                                                                                                     |       |
| 4  |                               | 26b | Additional consent provisions for collection and use of participant data and biological specimens in ancillary studies, if applicable                                                                                                                                               | n/a   |
| 5  |                               |     |                                                                                                                                                                                                                                                                                     |       |
| 6  |                               |     |                                                                                                                                                                                                                                                                                     |       |
| 7  | Confidentiality               | 27  | How personal information about potential and enrolled participants will be collected, shared, and maintained in order to protect confidentiality before, during, and after the trial                                                                                                | 5     |
| 8  |                               |     |                                                                                                                                                                                                                                                                                     |       |
| 9  |                               |     |                                                                                                                                                                                                                                                                                     |       |
| 10 | Declaration of interests      | 28  | Financial and other competing interests for principal investigators for the overall trial and each study site                                                                                                                                                                       | 19    |
| 11 |                               |     |                                                                                                                                                                                                                                                                                     |       |
| 12 |                               |     |                                                                                                                                                                                                                                                                                     |       |
| 13 | Access to data                | 29  | Statement of who will have access to the final trial dataset, and disclosure of contractual agreements that limit such access for investigators                                                                                                                                     | n/a   |
| 14 |                               |     |                                                                                                                                                                                                                                                                                     |       |
| 15 |                               |     |                                                                                                                                                                                                                                                                                     |       |
| 16 | Ancillary and post-trial care | 30  | Provisions, if any, for ancillary and post-trial care, and for compensation to those who suffer harm from trial participation                                                                                                                                                       | n/a   |
| 17 |                               |     |                                                                                                                                                                                                                                                                                     |       |
| 18 |                               |     |                                                                                                                                                                                                                                                                                     |       |
| 19 |                               |     |                                                                                                                                                                                                                                                                                     |       |
| 20 | Dissemination policy          | 31a | Plans for investigators and sponsor to communicate trial results to participants, healthcare professionals, the public, and other relevant groups (eg, via publication, reporting in results databases, or other data sharing arrangements), including any publication restrictions | 2, 15 |
| 21 |                               |     |                                                                                                                                                                                                                                                                                     |       |
| 22 |                               |     |                                                                                                                                                                                                                                                                                     |       |
| 23 |                               |     |                                                                                                                                                                                                                                                                                     |       |
| 24 |                               | 31b | Authorship eligibility guidelines and any intended use of professional writers                                                                                                                                                                                                      | n/a   |
| 25 |                               |     |                                                                                                                                                                                                                                                                                     |       |
| 26 |                               | 31c | Plans, if any, for granting public access to the full protocol, participant-level dataset, and statistical code                                                                                                                                                                     | n/a   |
| 27 |                               |     |                                                                                                                                                                                                                                                                                     |       |
| 28 |                               |     |                                                                                                                                                                                                                                                                                     |       |
| 29 | <b>Appendices</b>             |     |                                                                                                                                                                                                                                                                                     |       |
| 30 |                               |     |                                                                                                                                                                                                                                                                                     |       |
| 31 | Informed consent materials    | 32  | Model consent form and other related documentation given to participants and authorised surrogates                                                                                                                                                                                  | n/a   |
| 32 |                               |     |                                                                                                                                                                                                                                                                                     |       |
| 33 |                               |     |                                                                                                                                                                                                                                                                                     |       |
| 34 | Biological specimens          | 33  | Plans for collection, laboratory evaluation, and storage of biological specimens for genetic or molecular analysis in the current trial and for future use in ancillary studies, if applicable                                                                                      | n/a   |
| 35 |                               |     |                                                                                                                                                                                                                                                                                     |       |
| 36 |                               |     |                                                                                                                                                                                                                                                                                     |       |

\*It is strongly recommended that this checklist be read in conjunction with the SPIRIT 2013 Explanation & Elaboration for important clarification on the items. Amendments to the protocol should be tracked and dated. The SPIRIT checklist is copyrighted by the SPIRIT Group under the Creative Commons [“Attribution-NonCommercial-NoDerivs 3.0 Unported”](https://creativecommons.org/licenses/by-nc-nd/3.0/) license.



1  
2  
3  
4  
5  
6  
7  
8  
9  
10  
11  
12  
13  
14  
15  
16  
17  
18  
19  
20  
21  
22  
23  
24  
25  
26  
27  
28  
29  
30  
31  
32  
33  
34  
35  
36  
37  
38  
39  
40  
41  
42  
43  
44  
45  
46  
47  
48  
49  
50  
51  
52  
53  
54  
55  
56  
57  
58  
59  
60

Partners in Hope Medical Center

# Identifying efficient linkage strategies for HIV self-testing (IDEaL)

Kathryn Dovel, Principle Investigator  
Partners in Hope  
PO Box 302  
3-6-2019

## ABSTRACT

**Background:** HIV self-testing (HIVST) has been found to be a highly acceptable approach for men to learn of their HIV status and has resulted in increased testing uptake (Dovel 2019, cite Augustines stuff). However, rates of antiretroviral therapy (ART) initiation among those tested with HIVST are difficult to capture and some studies have suggested that linkage rates are low (Ortblad 2017, MacPherson 2014), particularly amongst men. We propose a clinical trial to test varying approaches to ART initiation among men who test HIV-positive through HIVST. We will test three interventions:

*Lightest Touch Intervention (Arm 1):* simple reminders to visit the health facility (given every two weeks);

*Staged Intervention (Arm 2):* a staged intervention that consecutively increases in intensity every month that a participant does not initiate ART (intervals include reminders, motivational interviewing, and home-based ART initiation);

*Intensive Intervention (Arm 3):* home-based ART initiation followed by linkage to the health facility of their choice the following month.

**Objective:** Our primary objective is to identify a cost-effective package for ART initiation among men identified as HIV-positive through HIVST in Malawi. Our specific objectives are:

Objective 1. Evaluate the effectiveness of the Staged ART Intervention vs Lightest Touch Intervention (primary analysis) and the effectiveness of the Staged ART Intervention vs Intensive Intervention (secondary analysis) on ART initiation within 4-months after enrolment in the trial.

Objective 2. Identify individual-, community-, and facility-level factors associated with ART initiation within each intervention arm (Lightest Touch; Staged; and Intensive Interventions).

Objective 3. Determine the cost and scalability of each intervention (Lightest Touch; Staged; and Intensive Interventions).

**Methods:** We will perform an individually randomized control trial with 543 HIV-positive men identified through HIVST and their female partners. Men will be individually randomized 1:1:1 to one of the three intervention arms described above. The study will be performed at 10 health facilities supported by Partners in Hope (PIH). Data collection will include baseline and follow-up surveys and interviews with men and women; medical chart reviews at four-months after study enrollment; qualitative interviews; and a cost analysis of costs associated with each arm. Participants will be enrolled in the study for a total of 4 months with approximately 2 or 3 study visits throughout that period.

**Anticipated results:** We anticipate learning about the most effective strategy to engage men in ART. We also anticipate learning about the type and degree of followup necessary to support men's engagement in ART services. Finally, we anticipate learning about the cost-effectiveness of intervention, with the goal of improving cost-effectiveness for the Ministry of Health. Results from this study could be used to define best practices and to further scale ART-focused programs for men in Malawi.

## TABLE OF CONTENTS

|                                                  |           |
|--------------------------------------------------|-----------|
| <b>1. INTRODUCTION</b> .....                     | <b>4</b>  |
| 1.1. Background.....                             | 4         |
| 1.2. Problem statement.....                      | 4         |
| 1.3. Justification.....                          | 4         |
| <b>2. OBJECTIVES</b> .....                       | <b>4</b>  |
| 2.1. Primary objective.....                      | 4         |
| 2.2. Secondary objectives.....                   | 4         |
| <b>3. LITERATURE REVIEW</b> .....                | <b>5</b>  |
| <b>4. METHODOLOGY</b> .....                      | <b>8</b>  |
| 4.1. Intervention description.....               | 9         |
| 4.2. Place of study.....                         | 11        |
| 4.3. OBJECTIVE 1.....                            | 12        |
| 4.3.1. Study design.....                         | 12        |
| 4.3.2. Target population.....                    | 12        |
| 4.3.3. Sampling techniques and enrollment.....   | 13        |
| 4.3.4. Study Activities.....                     | 13        |
| 4.3.5. Data collection techniques and tools..... | 15        |
| 4.3.6. Sample size determination.....            | 17        |
| 4.3.7. Data analysis.....                        | 17        |
| 4.4. OBJECTIVE 2.....                            | 17        |
| 4.4.1. Study design.....                         | 17        |
| 4.4.2. Target population.....                    | 17        |
| 4.4.3. Sampling techniques and tools.....        | 18        |
| 4.4.4. Data collection techniques and tools..... | 18        |
| 4.4.5. Sample size determination.....            | 19        |
| 4.4.6. Data analysis.....                        | 19        |
| 4.5. OBJECTIVE 3.....                            | 20        |
| 4.5.1. Study design.....                         | 20        |
| 4.5.2. Data collection techniques and tools..... | 20        |
| 4.5.3. Data analysis.....                        | 20        |
| <b>5. ETHICAL CONSIDERATIONS</b> .....           | <b>21</b> |
| <b>6. DISSMINATION OF RESULTS</b> .....          | <b>22</b> |
| <b>7. PERSONNEL ROLES AND INSTITUTIONS</b> ..... | <b>23</b> |
| <b>8. REGULATORY OVERSIGHT</b> .....             | <b>24</b> |
| <b>9. STUDY IMPLEMENTATION</b> .....             | <b>24</b> |
| <b>10. PROTOCOL DEVIATION REPORTING</b> .....    | <b>25</b> |
| <b>11. WORK PLAN TIMELINE</b> .....              | <b>25</b> |
| <b>12. BUDGET AND JUSTIFICATION</b> .....        | <b>25</b> |
| <b>13. REFERENCES</b> .....                      | <b>27</b> |
| <b>14. APPENDIX</b> .....                        | <b>30</b> |
| 14.1. APPENDIX A – Study Invitation Cards.....   | 30        |

|    |        |                                                                |
|----|--------|----------------------------------------------------------------|
| 1  |        |                                                                |
| 2  |        |                                                                |
| 3  | 14.2.  | <i>APPENDIX B – Recruitment and Screening Script</i> ..... 32  |
| 4  | 14.3.  | <i>APPENDIX C – Written Informed Consent- Female</i> ..... 36  |
| 5  | 14.4.  | <i>APPENDIX D: Written Informed Consent – Male</i> ..... 46    |
| 6  | 14.5.  | <i>APPENDIX E: Baseline Survey – Male</i> ..... 55             |
| 7  | 14.6.  | <i>APPENDIX F: Baseline survey – Female</i> ..... 100          |
| 8  | 14.7.  | <i>APPENDIX G: Follow-up Survey - Male</i> ..... 129           |
| 9  | 14.8.  | <i>APPENDIX H: Follow-up Survey – Female</i> ..... 137         |
| 10 | 14.9.  | <i>APPENDIX I: Data Extraction Tool</i> ..... 144              |
| 11 | 14.10. | <i>APPENDIX J: In-Depth Interview Guide – Female</i> ..... 147 |
| 12 | 14.11. | <i>APPENDIX K: In-Depth Interview Guide – Male</i> ..... 155   |
| 13 | 14.12. | <i>APPENDIX L: Personel CV’s</i> ..... 165                     |
| 14 |        |                                                                |
| 15 |        |                                                                |
| 16 |        |                                                                |
| 17 |        |                                                                |
| 18 |        |                                                                |
| 19 |        |                                                                |
| 20 |        |                                                                |
| 21 |        |                                                                |
| 22 |        |                                                                |
| 23 |        |                                                                |
| 24 |        |                                                                |
| 25 |        |                                                                |
| 26 |        |                                                                |
| 27 |        |                                                                |
| 28 |        |                                                                |
| 29 |        |                                                                |
| 30 |        |                                                                |
| 31 |        |                                                                |
| 32 |        |                                                                |
| 33 |        |                                                                |
| 34 |        |                                                                |
| 35 |        |                                                                |
| 36 |        |                                                                |
| 37 |        |                                                                |
| 38 |        |                                                                |
| 39 |        |                                                                |
| 40 |        |                                                                |
| 41 |        |                                                                |
| 42 |        |                                                                |
| 43 |        |                                                                |
| 44 |        |                                                                |
| 45 |        |                                                                |
| 46 |        |                                                                |
| 47 |        |                                                                |
| 48 |        |                                                                |
| 49 |        |                                                                |
| 50 |        |                                                                |
| 51 |        |                                                                |
| 52 |        |                                                                |
| 53 |        |                                                                |
| 54 |        |                                                                |
| 55 |        |                                                                |
| 56 |        |                                                                |
| 57 |        |                                                                |
| 58 |        |                                                                |
| 59 |        |                                                                |
| 60 |        |                                                                |

## 1. INTRODUCTION

### 1.1. Background

HIV self-testing (HIVST) is an effective strategy to improve HIV testing coverage, especially among hard-to-reach populations such as men and youth. Index testing, whereby a HIV positive client gives an HIVST kit to their sexual partner to use at home, is considered beneficial for its ability to maintain a testers privacy. The method is now recommended by the World Health Organization (WHO) and is being adopted as policy throughout sub-Saharan Africa (SSA). However, uptake of antiretroviral therapy (ART) and adherence after utilizing HIVST remains sub-optimal among certain population, specifically men. Innovative ART initiation and early retention strategies are urgently needed for Index HIVST to be successful.

### 1.2. Problem statement

We must better understand how to engage men in HIV care. Specifically, there is limited literature on feasible differentiated models to support men to start and stay on treatment that can be taken to scale. Further, there is increased recognition that individuals are at greatest risk of loss-to-follow-up during transition periods across the cascade (i.e. when starting ART). ART initiation and early retention must be improved if HIVST is to become a viable option for high-risk groups in SSA. To address this gap, we propose to conduct a study to test and evaluate varying strategies for ART initiation and retention amongst men.

### 1.3. Justification

This study will combine HIVST with a second-level intervention focused on ART initiation to address the urgent gap in ART initiation and early retention among HIVST users. Additionally, Objective 3 will allow us to develop the lowest cost intervention package while reaching the highest number of male partners.

## 2. OBJECTIVES

### 2.1. Primary objective

*Objective 1.* Test the impact of a staged ART intervention vs simple reminders and the effectiveness of a staged ART intervention vs home-based ART on ART initiation within 3-months of an HIV-positive diagnosis

### 2.2. Secondary objectives

*Objective 2.* Identify individual-, community-, and facility-level factors associated with ART initiation within each intervention.

*Objective 3.* Determine the cost and scalability of each intervention.

### 3. LITERATURE REVIEW

#### Background

Men in sub-Saharan Africa are less likely than women to use HIV services.<sup>1</sup> Men's absence from care is concerning not only for their own health, but also for the health of girls and young women who continue to be infected at unacceptably high rates.<sup>2</sup> HIV prevention and treatment programs have not traditionally been directed at men. Men are notably absent from international guidelines, national policies, and local HIV interventions. Research shows that women are 322% more likely to be mentioned in international HIV guidelines than men.<sup>3</sup> In the context of Malawi, national guidelines expect women of reproductive age to attend a health facility 5-17 times per year (equivalent to 19-63 hours)<sup>4</sup>, and 180-472 times in their reproductive lifespan (15-44 years). There are no such expectations for men (see Table 1). The justification for the global attention of HIV program thus far on women and girls is without dispute. Gender inequality is a key driver which impacts women's health and access to HIV services and creates specific vulnerabilities for women to HIV infection.<sup>5</sup> However, framing HIV as a woman's concern means we have failed to understand how gender affects and drives the burden of ill health for men, and inadvertently perpetuates the epidemic for young women and girls. Targeted strategies specific to men are urgently needed if we are to engage them in care.

**Table 1: Malawi ministry of health recommended health services and estimated visits required across the reproductive life span (15-44 years)**

| Service         | Frequency | Target Population | Estimated number of visits between 15-44 years |                                         |                                |           |
|-----------------|-----------|-------------------|------------------------------------------------|-----------------------------------------|--------------------------------|-----------|
|                 |           |                   | Women: 5-year FP (Implant; 9%*)                | Women: quarterly FG (injectables; 23%*) | Women: monthly FP (pills, 2%*) | Men       |
| ANC             | 17.6      | Women             | 18                                             | 18                                      | 18                             | -         |
| Delivery        | 4.4       | Women             | 4                                              | 4                                       | 4                              | -         |
| Post-natal      | 4.4       | Women             | 4                                              | 4                                       | 4                              | -         |
| Family Planning | 88        | Women             | 7                                              | 88                                      | 264                            | -         |
| Under five      | 120       | Women             | 120                                            | 120                                     | 120                            | -         |
| HIV testing     | 22.6      | Women and men     | 23                                             | 23                                      | 23                             | 29        |
| Circumcision    | 3         | Men               | -                                              | -                                       | -                              | 3         |
| <b>Total</b>    |           |                   | <b>176</b>                                     | <b>257</b>                              | <b>433</b>                     | <b>32</b> |

Male partners of women who are already identified as HIV-positive (index partners) are still a major concern for epidemic control due to high rates of multiple and concurrent partnerships among men<sup>6</sup> and the fact that index male partners have two times the risk of being HIV-positive as compared to the general male population.<sup>7</sup> Data from a recent HIVST study show that there is a high need for index testing among men in Malawi: across 3 high-burden district hospitals in Malawi, men represented 73% of all index partners in need of testing. Among those who did test, male partners were 4 times more likely to test HIV-positive than female partners (23% versus 3%), representing urgent unmet need among men.<sup>8</sup>

A recent Index HIV Trial in Malawi found that HIV testing among men increased dramatically when HIV-positive clients give HIVST kits to their sexual partners to use at home.<sup>9</sup> The study found that 66% of male partners in the HIVST arm tested for HIV compared to only 22% of men in the standard partner referral slip arm. Within the HIVST arm, men who tested for HIV had an HIV-positivity rate of 23%, with no adverse events reported (see Fig 1).<sup>2</sup> Index HIVST is highly acceptable and allows men to test at times and locations convenient for them, with complete privacy in their own homes.<sup>10,11</sup>

However, innovative ART initiation and early retention strategies are urgently needed for Index HIVST

to be successful. The aforementioned study showed that ART initiation was unacceptably low, with only 22% of HIV-positive men in the HIVST arm initiating ART at 6-months versus 75% of men in standard partner referral slip arm).<sup>3</sup> (See Figure 1). Poor rates of ART initiation are commonly reported across most HIVST studies, with ART initiation rates ~20-45%<sup>7,12-14</sup>, although ART initiation is notoriously difficult to measure within HIVST strategies. A cost analysis for national scale-up of Index HIVST in Malawi showed that 76% of men tested must initiate ART for Index HIVST to be cost-neutral at the national level as compared to using partner referral slips.

**Figure 1:** Male partner use of HIV services Index HIVST vs. referral slips (n=285) from HIVST trial (PI: Dovel)

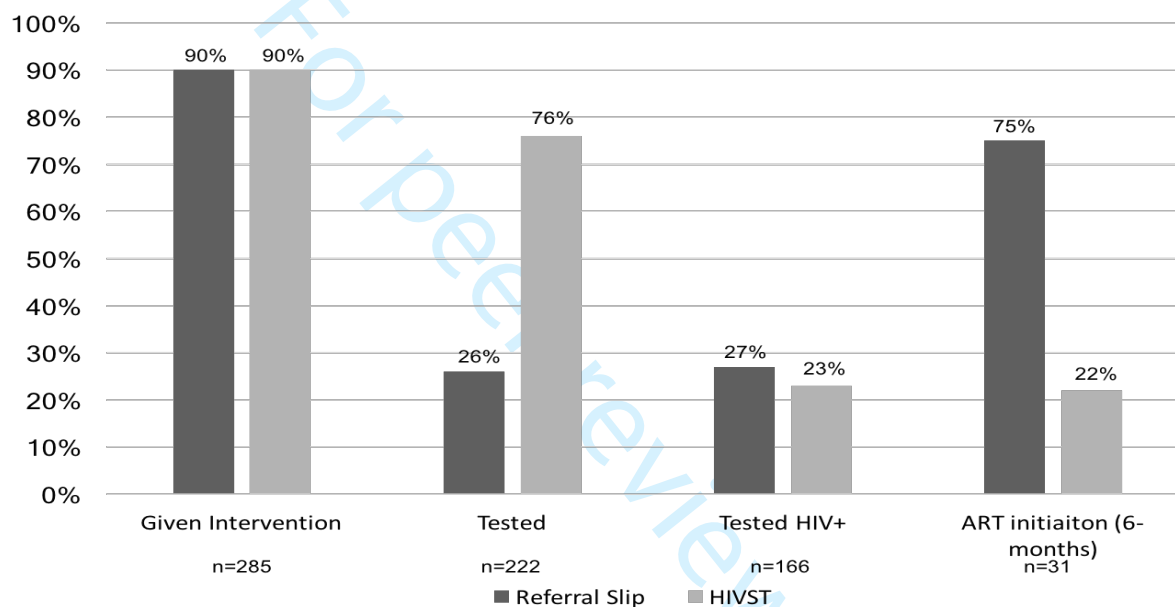

Two overarching barriers keep HIV-positive men from accessing ART services: (1) lack of male-friendly services,<sup>15-17</sup> and (2) harmful gender norms.<sup>18-20</sup> Male friendly services are private and convenient (requiring minimal time), and offered by health workers who understand the unique needs of men.<sup>21</sup> In addition, men are often unfamiliar with the health system, and are unsure how to navigate facility-based services. Gender norms that prioritize men as strong and self-reliant perpetuate fear of unwanted disclosure and stigma, and discourage men's engagement in ART.<sup>18,21</sup> Our research in Malawi found similar barriers to ART initiation for men who tested HIV-positive: men avoided ART services due to (1) fear of unwanted disclosure and stigma due to lack of privacy; (2) time/cost required to access care; (3) poor knowledge about the benefits of early ART initiation; and (4) beliefs that require men be strong, in control, and focused on short-term benefits such as daily financial earnings and respect from their male friends. Index HIVST must be combined with innovative ART interventions that address these barriers.

### **Evidence based for interventions that increase ART initiation**

We have conducted a thorough search of the literature and have identified several intervention strategies that may increase ART initiation among men who use HIVST: (1) reminders + peer navigation; (2) motivational interviewing; and (3) home-based ART.

*Reminders + Peer Navigation* is shown to help clients overcome fears about facility-based services and



1  
2  
3 provide peer modeling how to live successfully with HIV.<sup>22</sup> While the strategy has been primarily tested  
4 within traditional HIV testing strategies, we hypothesize that the same mechanisms will work for men  
5 who test through Index HIVST. Reminders are usually done over the phone via phone calls or SMS and  
6 can vary in frequency based on the health care workers disgression. Peer Navigation is assisted guidance  
7 to the health clinic as well as overviews of where to go/what to do when at the facility once there to  
8 ensure men feel more comfortable in the clinic environment.  
9

10 *Motivational Interviewing* is becoming widely recognized as a key strategy to help clients navigate  
11 barriers to the desired outcome by building client's self-efficacy, identifying internal motivation for the  
12 desired behavior, and establishing strategies and short- and long-term goals needed to reach a desired  
13 outcome.<sup>8,23</sup> Motivational interviewing is seen as particularly effective when clients need to make difficult  
14 decisions and overcome multi-level barriers to behavior change.<sup>24,25</sup> The strategy has been used to  
15 improve ART adherence<sup>8,25</sup> and reduce sexual risk behavior.<sup>15</sup>  
16

17 In contrast, traditional counselling efforts are largely informational and directive, whereby health care  
18 workers deliver a pre-determined counseling package that is not responsive to a client's individual  
19 situation.<sup>16,17</sup> Such methods have been proven largely ineffective,<sup>18</sup> particularly with hard-to-reach  
20 populations such as men.<sup>19</sup> Motivational interviewing differs from traditional strategies by adopting a  
21 client-centered approach is based on collaboration, evocation and respect for autonomy. We hypothesize  
22 that these counseling techniques will encourage HIV status acceptance and disclosure, promote health  
23 seeking behavior, provide coping strategies men need to overcome barriers related to facility-based care,  
24 and ultimately, facilitate ART initiation.  
25

26 Furthermore, motivational interviewing and client-centered care should resonate with and address the  
27 needs of men. Partners in Hope Malawi conducted 25 interviews with men and 6 focus group discussions  
28 with health care workers and female partners (n=42) to assess what health services men desired.  
29 Overwhelmingly, men reported wanting increased counseling on sexual health (including HIV) and  
30 marital concerns. Exit surveys with male ART clients (n=180) show that only 38% of men were aware of  
31 Treatment as Prevention and 65% aware of the benefits of early ART initiation, highlighting major  
32 knowledge gaps that may influence engagement in care. Motivational interviewing and client-centered  
33 counseling will be able to address both gaps in ART treatment and sexual health knowledge.  
34

35 *Home-based ART initiation* has improved ART initiation across the region. A systematic review found  
36 that home-based ART is associated with ART retention, decreased mortality,<sup>26</sup> and in some cases, reduced  
37 stigma and increased privacy.<sup>27,28</sup> We conducted one of the only studies to examine home-based ART  
38 initiation within a community HIVST distribution strategy (Co-I: Choko). We found that home-based  
39 ART initiation alongside home-based HIVST significantly increased ART initiation as compared to  
40 standard facility-based initiation (RR 2.94; p-value<0.001).<sup>13</sup>  
41

42 Home-based ART may be particularly attractive to hard-to-reach men because it reduces client time  
43 required to access services and provides an easy, opt-out entry point for men who otherwise may have  
44 never engaged with the health care system, or know how to navigate complicated, busy health facilities.  
45 Home-based ART has been associated with a three-fold reduction in financial costs to clients.<sup>29</sup> Further,  
46 home-based ART facilitates client-centered, one-on-one care that is often not feasible in busy clinic  
47 settings.  
48

49 The Malawi Ministry of Health is in the process of rolling out community-based ART distribution  
50 strategies, and may consider home-based ART initiation for hard-to-reach populations. However, home-  
51 based ART is considered a resource intensive strategy, and therefore should (1) only be offered to the  
52 hardest-to-reach populations, and (2) requires that clients who initiate ART at home-based eventually link  
53 into facility-based care. Additionally, findings from a recent Index HIVST Trial show that home-based  
54 services for men is acceptable to female ART clients in the Malawian context, with minimal risk of  
55 adverse events. Over 90% of female ART clients had disclosed their HIV-status to their partner and were  
56 willing to have their male partners traced in their homes for additional services.  
57  
58  
59  
60



Finally, increased privacy and decreased wait-times are essential if men are to engage in HIV services. As part of a study on new Universal Treatment policies in Malawi, 15 in-depth interviews and 208 surveys were conducted with newly diagnosed HIV-positive men. Fear of unwanted disclosure due to limited privacy and a lack of trust in the health facility were the primary barriers to men's ART initiation. Home-based ART initiation can help address these barriers for ART initiation, and motivational interviewing can help provide men the skills needed to navigate these barriers within the health system in order to promote ART retention. Further, the vast majority (>95%) of men who used HIVST in the Index HIVST trial disclosed their HIV status to their female partner<sup>8</sup>, meaning that home visits (i.e., reminders, peer navigation, motivational interviewing, or home-based ART) will not increase risk of unwanted disclosure to one's sexual partner. Table 2 below outlines how the proposed interventions will address barriers to ART initiation identified in the literature.

**Table 2.** Levels and specific barriers to men's ART initiation, and intervention components

| Barriers to ART Initiation                                 | Intervention Components       | Level of Intervention |
|------------------------------------------------------------|-------------------------------|-----------------------|
| Unfamiliar with health system                              | Reminders and Peer Navigation | Health System         |
| Belief about gender norms and focus on short-term benefits | Motivational Interviewing     | Community/Individual  |
| Poor knowledge                                             |                               |                       |
| Time/cost requirements                                     | Home-Based ART Initiation     | Health System         |
| Lack of privacy/fear of disclosure                         |                               |                       |
| Unfamiliar with health system                              |                               |                       |

#### 4. METHODOLOGY

This study will be an individually randomized trial comparing three different strategies to improve ART initiation and early retention among men who test HIV-positive with HIVST. Study staff will utilize the Ministry of Health Index Testing Register and trace HIV positive women and their male partners to be screened and enrolled if they meet the inclusion criteria. Enrolled men will be randomized to one of three arms and will receive follow up and varying degrees of support based on the arm assigned. Outcomes will be assessed after 90 days after enrollment. Survey data, qualitative data, medical chart data (Objectives 1 and 2) and costing data (Objective 3) will be collected over years 1-3. A study flow chart is illustrated below (Figure 2).

Figure 2: Study flow chart

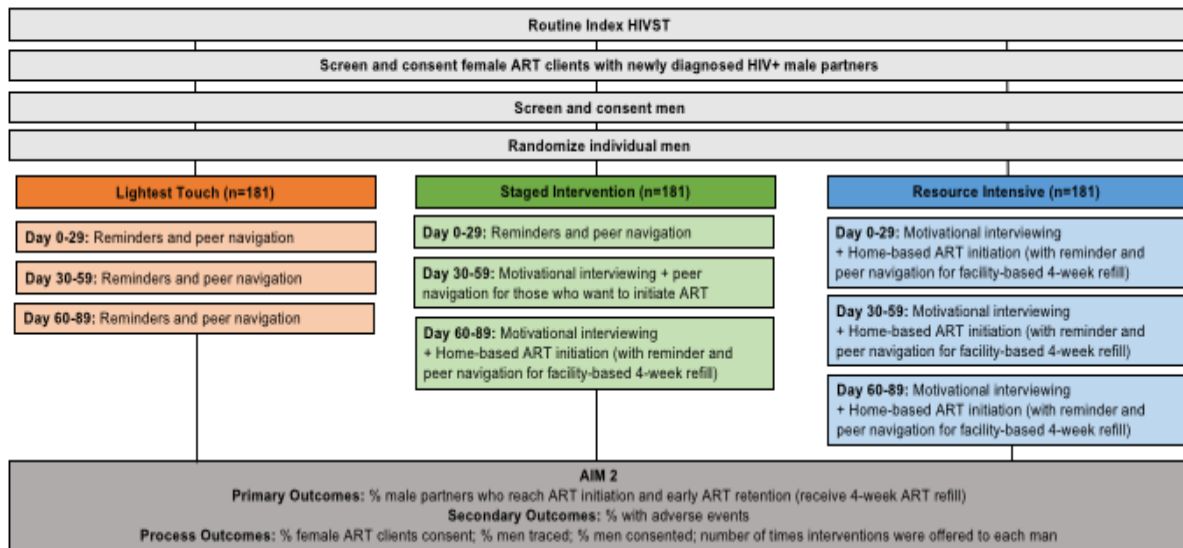

4.1. Intervention description

Each arm will offer an intervention immediately after study enrollment (that same day; day 0). Follow-up interventions will be offered every 14 days after that until 76 days or ART initiation is reached, whichever comes first.

Description of study arms:

**Arm 1: “Lightest Touch” Intervention**, whereby facility staff provide reminders and peer navigation (SMS and home visits) for men to encourage enrolment in facility-based ART programs. One reminder on the day of enrollment and every 14 days thereafter, until 76 days or ART initiation, whichever comes first. If initiation is not reached at 90 days, the patient will be classified as not initiated for study purposes. See Arm 1 diagram below:

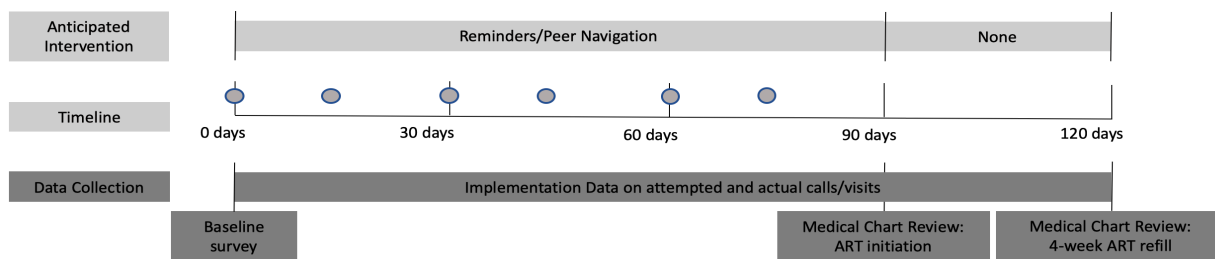

Fig 2. Timing of interventions to be offered in Aim 1

Legend:

● Approximate time the intervention will be offered (approximately every 2 weeks until 76 days, or until ART initiation, whichever comes first)

**Arm 2: “Staged” Intervention**, whereby the intervention will build in intensity each month for those

who have not initiated ART in the previous month, or for a maximum of 3 months, whichever comes first. The following intervention components that will be added each month (incrementally) until the first ART distribution is completed:

- Day 0-29: Reminders and, for those who agree to initiate, peer navigation;
- Day 30-59: Motivational interviewing and, for those who agree to initiate, peer navigation;
- Day 60-79: Motivational interviewing + home-based ART initiation and, for those who initiate, reminders and peer navigation for the facility-based 4-week ART refill appointment).

See Arm 2 diagram below:

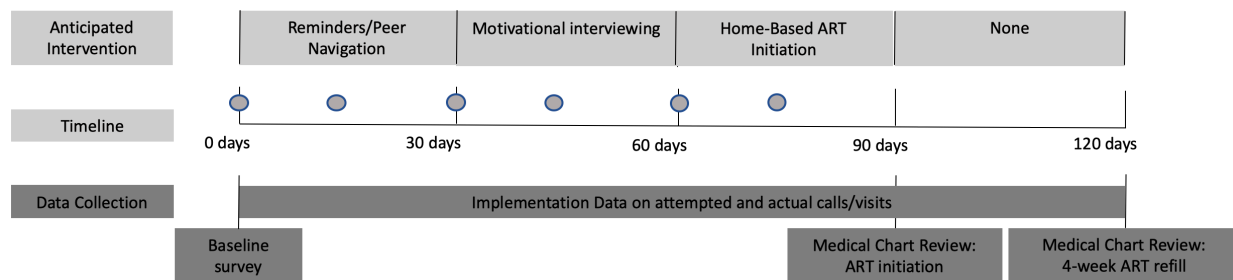

Fig 3. Timing of interventions to be offered in Aim 2

**Legend:**

- Approximate time the intervention will be offered (approximately every 2 weeks until 76 days, or until ART initiation, whichever comes first)

**Arm 3: “Intensive” Intervention**, whereby the most resource intensive intervention is offered immediately to all HIV-positive male partners. See Fig 4 for timeline. Components include:

- Motivational interviewing
- Home-based ART initiation
- 4-weeks after ART initiation: Reminders and peer navigation to facility for 4-week ART refill appointment

Home-based ART initiation will be scheduled at times convenient for men, including evening and weekend hours. Men who prefer to initiate in another private location in the community (besides their home) will be able to do so. The first home-visit will be conducted by a trained nurse and will include confirmatory HIV testing using Ministry of Health standard algorithm (Determine + Unigold), pre-ART counseling and motivational interviewing, a basic health evaluation, and ART initiation with a 30-day supply of first-line ART in Malawi – dolutegravir, tenofovir, and lamivudine as a single tablet. Clients will also be given a 30-day supply of cotrimoxazole, which is standard of care for all HIV-positive individuals.

Prior to ART initiation, a basic health evaluation will be performed by the nurse, including screening for tuberculosis with routine questions.<sup>66</sup> Any individual identified by the study nurse with concerns for an active opportunistic infection or other health problem(s) that could complicate home-based ART will be immediately referred and escorted to the facility.

At the same visit, motivational interviewing will be performed in preparation for men to engage in facility-based ART services. This includes counseling on the benefits of early ART, strategies for disclosure and positive living, strategies to overcome facility-based barriers to ART services, and addressing harmful gender norms that may discourage men from using care. Counseling will be adaptive to the needs and concerns of male clients. At 4-weeks after ART initiation, an expert client will escort the

man to a nearby facility of his choice to join the facility-based ART cohort. Peer navigation will be provided to ensure men become familiar with the facility-based program. Men who wish to attend a facility that is not nearby will be linked with a male counselor from the selected facility. After completing all facility-based ART services for that day, the male partner will receive additional client-centered counseling with the same counselor to discuss the experience, benefits and challenges associated with facility-based ART, and strategies to overcome barriers. See Arm 3 diagram below:

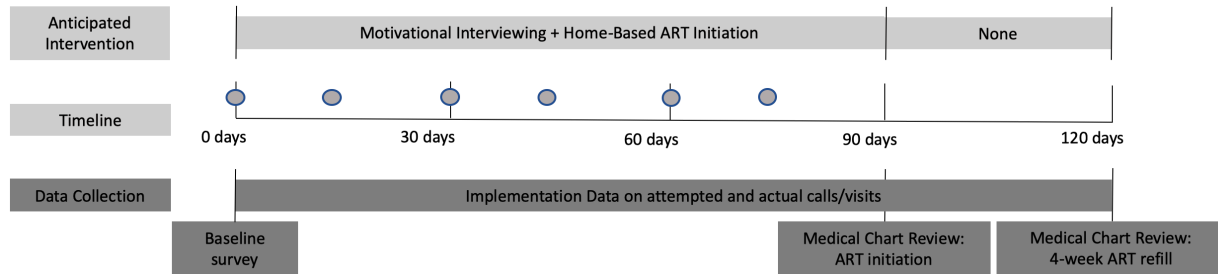

Fig 4. Timing of interventions to be offered in Aim 3

Legend:

● Approximate time the intervention will be offered (approximately every 2 weeks until 76 days, or until ART initiation, whichever comes first)

4.2. Place of study

All study activities will take place in 10 Partners in Hope supported facilities within the Lilongwe and Chikwawa districts, representing 19,198 adult female ART clients across all sites. These districts were chosen because they are priority districts for the Presidents Emergency Plan for AIDS Relief (PEPFAR) and have the highest HIV prevalence and unmet need of all Partners in Hope supported districts. See Table 3 for the selected 10 health facilities.

Table 3: Selected study sites

| District   | Facility name                 | ART Cohort Size |
|------------|-------------------------------|-----------------|
| Chickwawa  | St. Monftord Mission Hospital | 3533            |
| Chickwawa  | Kalemba Community Hospital    | 2087            |
| Chikwawa   | Chickwawa District Hospital   | 4898            |
| Kasungu    | Kasungu District Hospital     | 5942            |
| Lilongwe   | Nkhoma Community Hospital     | 2166            |
| Lilongwe   | Mponela Rural Hospital        | 1099            |
| Lilongwe   | Daeyang Luke Hospital         | 1594            |
| Nkhotakota | Nkhotakota District Hospital  | 5361            |

|        |                          |      |
|--------|--------------------------|------|
| Nsanje | Nsanje District Hospital | 3904 |
| Nsanje | Ngabu Rural Hospital     | 1237 |

Specific methodology for each Objective is described below:

### 4.3. OBJECTIVE 1

**Evaluate the effectiveness of the Staged ART Intervention vs Lightest Touch Intervention (primary analysis) and the effectiveness of the Staged ART Intervention vs Intensive Intervention (secondary analysis) on ART initiation within 4-months after enrolment in the trial.**

- **Hypothesis 1.1:** 25% of men will initiate ART with simple reminders compared to 45% with motivational interviewing
- **Hypothesis 1.2:** 65% of men will initiate ART with home-based ART initiation compared to 45% with motivational interviewing

#### 4.3.1. Study design

We will conduct an individually randomized controlled trial at 10 high-burden facilities in Malawi.

#### 4.3.2. Target population

We will enroll 543 HIV-positive men identified through routine Index HIVST strategies and their female partners (1,086 participants total). While men are the primary focus of the study, female partners will be enrolled in order to understand their perception of their male partners use of ART services, acceptability of the intervention, and any unintended outcomes or adverse events.

##### *Eligibility Criteria*

Female ART clients will be enrolled in order to conduct baseline and follow-up surveys to understand their perception of their male partners use of ART services, acceptability of the intervention, and any unintended outcomes or adverse events.

##### *Female Partner*

- Inclusion criteria include: (1) client and partner are  $\geq 15$  years of age; (2) partner lives in facility catchment area; (3) partner tested HIV-positive and has not initiated ART; and (4) ART client reports no interpersonal violence (IPV) as defined by WHO with their current sexual partner in the past 12 months.
- Exclusion criteria include: (1) client and partner are  $< 15$  years of age; (2) partner does not live in facility catchment area; (3) partner has not tested HIV-positive or has testing positive and has initiated ART; and (4) ART client has reported interpersonal violence (IPV) as defined by WHO with their current sexual partner in the past 12 months.

Men will be enrolled as the primary recipient of the intervention.

##### *Male partner*

- Inclusion criteria include: (1) self and partner  $\geq 15$  years of age; (2) live in the facility catchment area (i.e., in the past 30 days, has spent  $\geq 50\%$  of all nights in the village); (3) has tested HIV-positive and has not initiated ART;

- Exclusion criteria include: (1) self and partner <15 years of age; (2) does not live in the facility catchment area (i.e., in the past 30 days, has spent <50% of all nights in the village); (3) has not tested HIV-positive or has tested HIV-positive and has initiated ART

#### 4.3.3. Sampling techniques and enrollment

Sampling, screening, and enrolling male partners will be embedded within routine Index HIVST strategies.

##### Brief description of Routine MOH HIVST Guidelines

Briefly, routine Index HIVST includes three steps:

- *Identify ART clients with sexual partners in need of Index HIVST:* as outlined in the Malawi guidelines within the health care facility.
- *Distribute Index HIVST:* ART clients with a partner of unknown status will receive standard Index HIVST kit. They will be provided a demonstration, counseling, and an overview of risks and benefits.
- *Follow-Up on Index HIVST Use:* During their next ART appointments, ART clients are asked about HIVST distribution, use, and result of the HIVST kit, along with male partner linkage to a health facility for those who tested HIV-positive (i.e., confirmatory HIV testing and ART initiation). Data are documented in the Index HIVST register.

Once routine Index HIVST activities are completed, study recruitment and enrollment will commence. See Figure 3 for a complete description of participant enrollment and study activities.

**Figure 3:** Study screening and enrollment procedures flow chart

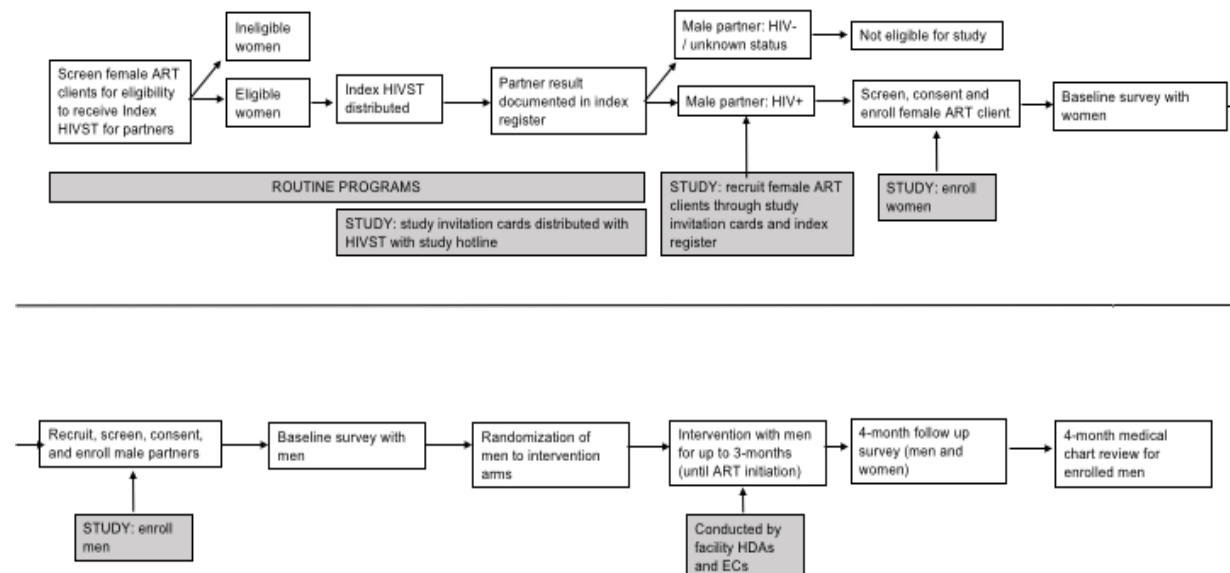

#### 4.3.4. Study Activities

##### Female ART client recruitment



1  
2  
3 To maximize the number of male partners available for enrollment, the study team will introduce study  
4 invitation cards as part of Index HIVST activities and include them with HIVST kits distributed as a part  
5 of routine Index HIVST procedures (described above). Study invitation cards will include a 'hotline'  
6 phone number and will not provide any HIV specific information to ensure confidentiality. (see Appendix  
7 A for study invitation card). Female partners will be informed that should their male partner be found  
8 HIV-positive, they and their partner may be eligible for a study and should call the hotline number of the  
9 invitation card to receive more information.  
10

11 In addition, the study team will review the Index Testing Register on a regular basis to identify female  
12 ART clients who reported HIV-positive male partners through routine Index HIVST procedures. Female  
13 ART clients identified will be contact by routine facility staff to be informed about the study and refered  
14 to study staff if interested in enrollment.  
15

#### 16 17 *Female ART client enrollment*

18 Female partners interested in the study will provide oral consent to participate in study screening and be  
19 screened for eligibility for the study (Appendix B). Study staff will conduct all consent and screening  
20 activities. If eligible and willing to participant, written informed consent will be obtained (Appendix C).  
21 Female partners will be enrolled even if their male partner (1) does not consent to study participation (2)  
22 cannot be traced.  
23

24 Upon enrollment in the study, female ART clients will work with study staff to make a plan for inviting  
25 male partners to enroll in the study. Baseline surveys with female ART clients will be conducted that  
26 same day or on a day convenient for the female ART client. Women whose partners agree to participate  
27 in the study will be followed up after 4-months for a follow up survey regardless of the outcome of their  
28 partner (ie loss-to-follow-up).  
29

#### 30 31 *Male partner recruitment*

32 Once female ART clients are enrolled, male partners will be recruited, screened, and consented. Study  
33 staff will work with the female ART client to establish a recruitment plan that is acceptable and feasible  
34 for the women. This may include women referring male partners to the study staff, study staff actively  
35 recruiting male partners based on information provided by the female client, or a joint approach where the  
36 study staff approaches male partners with the female ART client. Each female ART client enrolled in the  
37 study will be allowed to choose the recruitment strategy that best fits her individual situation and the  
38 needs of her partner.  
39  
40

#### 41 42 *Male partner enrollment*

43 Men found eligible and willing to participate, will provide written informed consent (Appendix D) and  
44 will be randomized to one of the three study arms. Randomization will occur using an electronic  
45 randomization system on tablet devices. A baseline survey will be concuted immediately following  
46 consent and the intervention will be carried out over the course of 3 months. Men will be contacted by the  
47 study staff 4-months after enrollment for a follow-up survey.  
48  
49

#### 50 51 *Randomization*

52 Randomization will be conducted after completion of the baseline survey with male participants. Study  
53 staff will show randomization results as a picture on a pre-programmed tablet, allowing the participant to  
54 view the results themselves in order to maximize transparency and study buy-in. Male participants will be  
55 randomized to 1 of three arms and will be randomized 1:1:1.  
56  
57  
58  
59  
60

### *Intervention*

Interventions will be offered immediately after study enrollment (that same day or the closest day that is convenient for the male participant). Follow-up interventions will be offered every 14 days after enrollment until 76 days after enrollment in the study or ART initiation is reached, whichever comes first. See a full description of the intervention in the Intervention Description section (4.1).

Intervention arms include:

1. ***Lightest touch arm:*** reminders and peer navigation to facility-based ART services
2. ***Staged arm:*** intervention builds in intensity each month for those who have not initiated ART in the previous month. Strategies include reminders and peer navigation, motivational interviewing, and home-based ART initiation
3. ***Intensive arm:*** home-based ART initiation + motivational interviewing + peer navigation to facility-based ART services for their 4-week follow-up appointment

Male expert clients and male nurses will complete all intervention activities to ensure it is as close to real-world implementation as possible (not implemented by Research Assistants). Research Assistants will support facility staff to ensure men are given the appropriate intervention (based on randomization arm), and that all staff activities related to the intervention are documented (i.e., how many reminders were given to each client, ect.). Intervention monitoring and evaluation tools will be developed and incorporated into the facility staff daily routine. Weekly reviews of all intervention monitoring tools and planning for the following week will be completed with study expert clients, nurses, and Research Assistant to ensure adherence to the study protocol. The Study coordinators and PI's will be highly involved throughout the implementation process to ensure protocol adherence.

#### ***4.3.5. Data collection techniques and tools***

Data collection tools will include:

- ***Baseline Survey:*** Research assistants will administer baseline surveys with both female ART clients and male partners immediately following enrollment (before randomization). Surveys will collect data on male and female demographics, sexual partnerships and couple dynamics, and men's history with health services, and HIV services specifically. (Appendix E & F)
- ***Follow-up Survey:*** Research assistants will administer follow-up surveys with female ART clients and male participants 4-months after enrolment in the study. Follow-up surveys with men will assess the primary outcome of interest (ART initiation and completion of 4-week follow-up appointment), acceptability of the intervention, and any adverse events (ie., unwanted status disclosure). Men who cannot be reached will be counted as failures for true ART initiation. Follow-up surveys with female ART clients will assess acceptability of the intervention and any adverse events (i.e., IPV, end of the relationship, or unwanted disclosure) associated with intervention procedures. (Appendix G & H)
- ***Medical Chart Reviews:*** Identifiers will be collected for all men enrolled in the study, including name, age, village and address, and phone number. Identifiers will be used to conduct medical chart reviews at 4-months after enrollment as another measure of ART initiation (attendance to the 4-week follow-up ART appointment). Facility staff (established data clerks employed by Partners in Hope) will review medical records at study facilities and all other Partners in Hope



supported facilities within participating districts (61 facilities in total) to account for men who engage in ART outside study facilities. We successfully used this method in other HIVST studies to capture ART initiation.<sup>3</sup> Male partners who are not found in medical chart reviews will receive a follow-up home-visit to confirm ART outcomes through review of their individual medical record book (health passport) and self-reporting in the event that there are gaps in the record. Men who cannot be reached will be counted as failures for true ART initiation. (Appendix I)

- *Process Implementation Data:* Expert clients, nurses, and research assistants will keep daily logs as part of study monitoring and evaluation tools in order to assess the implementation of the intervention for each participant. Primary events to be recorded in the daily logs are: (1) unable to reach participant (and reason); (2) contacted participant; (3) intervention provided (and notes about the challenges and successes of the interaction); and (4) other comments relevant to intervention implementation. Each event will be recorded with a corresponding date.

Primary and secondary outcomes are measured through medical chart reviews and follow-up surveys (see Table 4).

**Table 4: Study Measures for Objective 1**

| Outcome                                                                                                                   | Measurement                                                                                                                  | Source                           |
|---------------------------------------------------------------------------------------------------------------------------|------------------------------------------------------------------------------------------------------------------------------|----------------------------------|
| <b>Primary Outcomes</b>                                                                                                   |                                                                                                                              |                                  |
| Early ART Retention                                                                                                       | Proportion of men who initiate ART at 3-months and attended their 4-week ART refill appointment at 4-months after enrollment | Medical chart review at 4-months |
| <b>Secondary Outcomes</b>                                                                                                 |                                                                                                                              |                                  |
| ART initiation                                                                                                            | Proportion of men who initiate ART at 3-months after enrollment                                                              | Medical chart review at 3-months |
| Adverse events by female ART client (IPV, unwanted disclosure, end of relationship) or male partner (unwanted disclosure) | Self-report from female ART client and their male partners who were identified as HIV-positive                               | Follow-up surveys at 4-months    |
| <b>Process Outcomes</b>                                                                                                   |                                                                                                                              |                                  |
| Proportion of female ART clients who consent                                                                              | Proportion of eligible ART clients who consent to the participate in the study                                               | Process implementation data      |
| Proportion of men traced                                                                                                  | Proportion of men who were successfully traced within 3-months after female ART client is enrolled                           | Process implementation data      |
| Proportion of men who consented                                                                                           | Proportion of eligible men who consent to participate in the study                                                           | Process implementation data      |

- *Sensitivity analyses for men excluded from the trial:* We recognize that men's consent to participate in the study may bias the sample enrolled in the study. There are two groups that we may not be able to include in the main study: (1) men we are unable to trace/contact (herein referred to as "unreachable men") and (2) men we are able to reach but who refuse to participate in the main trial (herein referred to as "male refusers"). We will take two approaches to address this potential bias
  - Unreachable Men: We will collect data on men who are unreachable via their female partner. Female partners for these men will complete a brief survey regarding Surveys will collect data on male and female demographics, sexual partnerships and couple dynamics, and men's history with health services, and HIV services specifically (as reported by female partners). We successfully used similar methods in the Index HIVST Trial.
  - Male Refusers: Men who are contacted but do not consent to the trial will be consented for a one-time survey immediately following refusal for the larger study. The same data will be collected, as described above.

#### 4.3.6. *Sample size determination*

We powered the study to detect differences in ART initiation between Lightest Touch and Staged Interventions at 4-months after enrollment (primary outcome). We also assured we were powered to detect differences in ART initiation between Staged Interventions and the Intensive Intervention. We Assume that 25% of men in the Lightest Touch arm, 55% in the Staged Intervention arm, and 75% in the Resource Intensive arm initiate ART at 3-months and attend their 4-week follow-up appointment at 4-months. Any man lost to follow-up in any arm will be treated as failures for the outcome evaluation. The sample size needed to detect this difference with the power of 0.8 is 181 men per arm. The calculation is based on asymptotic normality of log odds ratio. We need to enroll and randomize a total of 543 HIV-positive men. Assuming that 25% of women have partners of unknown status, 65% of male partners will use the HIVST kit, 25% of them will be HIV-positive, and 80% of them will enroll in the study, we will need to screen over 3,000 women who were given index HIVST to reach the required sample size.

#### 4.3.7. *Data analysis*

All randomized men will be included in the analysis of primary outcomes; men with missing outcome assessment due to loss to follow-up will be treated as outcome failures. All primary outcomes are binary; they will be analyzed by logistic regression models with intervention as a predictor, adjusted for baseline socioeconomic and demographic variables. We will conduct sensitivity analyses to account for men who we were never able to contact (unreachable men) and men who refused to participate in the full trial (refusers). We will run several analyses whereby the denominator includes (1) unreachable men and refusers; and (2) refusers.

### 4.4. OBJECTIVE 2

#### **Identify individual-, community-, and facility-level factors associated with ART initiation within each intervention arm (Lightest Touch; Staged; and Intensive Interventions).**

- **Hypothesis 2.1:** In quantitative data, older men, men without strong social support networks, men with high levels of internalized and perceived HIV-related stigma, and men who hold rigid beliefs of gender norms and men's role as the provider and decision maker of the home will be less likely to initiate ART.
- **Hypothesis 2.2:** In qualitative data, primary factors influencing men's decision to start ART will be perceptions of feeling healthy, perceptions of one's ability to continue working and providing for their family without ART initiation, and perceptions of HIV-related stigma within one's community.

#### 4.4.1. *Study design*

We will use baseline survey data from the randomized trial (Objective 1) to identify factors associated with ART initiation among men. We will also conduct 200 semi-structured in-depth qualitative interviews with a random sub-set of enrolled men (n=100) and their female partners (n=100) to assess in-depth characteristics of men who fail to engage in care, contextualize decisions around ART initiation and retention, and understand additional strategies that may be needed for male partners to successfully initiate and be retained in ART programs.

#### 4.4.2. *Target population*

All men and women enrolled in the overarching trial will complete a baseline survey. Eligibility criteria for study enrollment is described in detail under Objective 1.

A subset of men and women enrolled in the overarching trial will be randomly selected to complete an in-depth interview. Eligibility criteria for in-depth interview are as follows:

### Male partners

- Inclusion criteria include: (1) randomly selected using electronic random selection techniques; (2) linked to care within 4-months after enrolling in the study (defined as completing the 4-week ART refill appointment) (n=50 respondents); or (3) did not link to care within 4 months (n=50 respondents)
- Exclusion criteria include: (1) not randomly selected using electronic random selection techniques

### Female partners

- Inclusion criteria include: (1) randomly selected using electronic random selection techniques; (2) partners could never be traced for study enrollment; or (3) partners were enrolled but were lost to follow up and unable to be reached again
- Exclusion criteria include: (1) not randomly selected using electronic random selection techniques; (2) partners could be traced for study enrollment; or (3) partners were enrolled and were not lost to follow up and were able to be reached again

#### 4.4.3. Sampling techniques and tools

Survey data will include all men and women enrolled in the study (n=1,086; described in detail in Objective 1). 100 men (~ 33 per study arm) and 100 women (~ 33 per study arm) enrolled in the study will be randomly be selected for in-depth interviews.

#### 4.4.4. Data collection techniques and tools

**Surveys:** Baseline and 4-month follow-up surveys will be conducted with men and women enrolled in the trial. They will focus on:

- *Health care system:* perceptions regarding the following aspects of ART services (i) privacy and confidentiality; (ii) availability of services; (iii) wait-time and distance to facility; (iv) quality of care and rude behavior from health care providers, using validated measures.
- *Sociodemographics:* (i) age; (ii) household assets; (iii) work; and (iv) substance use
- *Couple characteristics:* (i) relationship type and length; (ii) sexual activity and risk; (iii) frequency of communication; (iv) disclosure; (v) joint decision making using standard measures from Demographic Health Survey (DHS);<sup>17</sup> (vi) gender norms using validated Gender Equitable Men (GEM) Scale,<sup>67</sup> and (v) Revised Conflict Tactics Scale.<sup>68</sup>
- *Knowledge/perceptions and biomedical factors:* (i) knowledge about HIV and ART (treatment as prevention, benefits of early ART); (ii) risk perception (morbidity and mortality); standard DHS measures on (iii) previous use of HIV services and (iv) self-rated health;<sup>17</sup> and (v) WHO staging at enrollment.

**In-depth interviews:** Table 5 below describes in-depth interview participants and justification. In-depth interview guides for men and women are developed based on existing literature and our extensive experience conducting in-depth interviews with this population (Appendix J and K). Female partners will provide important insight into the circumstances of these men, and potential strategies to more effectively reach them. Men's qualitative feedback is particularly important for the staged intervention and intensive intervention since these are fairly novel and under explored.

**Table 5.** Description of in-depth interview participants and justification

| Participant type                                                                         | Number of interviews | Justification                                                                                                                                           |
|------------------------------------------------------------------------------------------|----------------------|---------------------------------------------------------------------------------------------------------------------------------------------------------|
| Women whose male partners were <b>unreachable</b> during the study enrollment            | 50 (~ 16 per arm)    | To understand the couple dynamics and characteristics of men who were never traced and additional strategies to reaching these men                      |
| Women whose male partners were <b>loss-to-follow-up after</b> study enrollment           | 50 (~ 16 per arm)    | To understand the couple dynamics and characteristics of men who were loss-to-follow-up, and additional strategies to better engage these men in care   |
| Male participants who <b>did not</b> complete 4-week ART refill appointments by 4-months | 50 (~ 16 per arm)    | To understand what they liked and did not like about the intervention, why they did not link to ART, and suggestions on how to improve the intervention |
| Male participants who completed 4-week ART refill appointments by 4-months               | 50 (~ 16 per arm)    | To understand what they liked and did not like about the intervention, why they linked to ART, and suggestions on how to improve the intervention       |

#### 4.4.5. Sample size determination

Survey sample size details provided in Objective 1. The number of interviews required for qualitative data can be challenging to predict. Data should be collected until saturation is reached, meaning that no new themes or relevant information is emerging. The exact number of interviews required to reach saturation differs based on the aim of the study, the diversity in respondents, and the theoretical framework used for analysis.<sup>30</sup> However, a basic rule of thumb is that no sample size should be under 25 participants in order to reach saturation and identify all relevant themes or new information important to the study.

#### 4.4.6. Data analysis

**Surveys:** Subjects with complete data in outcomes as well as predictors will be included in the analysis. We will calculate descriptive statistics, including mean/median, variation (standard deviation, kurtosis), range, and frequency distributions for the demographic and clinical characteristics, overall and by study arm. Logistic models will be developed for the probability of a positive outcome, with sociodemographic factors included as covariates in a suitable form (linear/spline/factor). Differences in the prevalence of each of the outcomes of interest will be examined by study arm as well as by other factors of interest including demographic characteristics (e.g., age), couple characteristics, and knowledge/perceptions and biomedical knowledge. The differences will be evaluated using t-tests, Mann-Whitney U test (or other non-parametric tests), chi-square methods, and Fisher's exact test as appropriate.

**In-depth interviews:** Audio recordings of in-depth interviews will be transcribed and translated to English. A preliminary codebook will be developed for both interview types (male and female). Selected investigators will pilot a codebook by independently reading and coding a randomly-selected subset of transcripts. Through an iterative consultative process, each investigator will revise their respective codebook and repeat this process until there was high interrater reliability among the group. All

transcripts will be coded in Atlas.ti v8.3 using constant comparison, and coding disagreements were resolved by consensus.

#### 4.5. OBJECTIVE 3

##### **Determine the cost-effectiveness and scalability of the intervention arms through costing and mathematical modeling.**

- **Hypothesis 3.1:** The staged intervention will be more cost effective at having men initiate ART than both the lightest touch intervention and the intensive intervention.

##### **4.5.1. Study design**

We will conduct an incremental cost-effectiveness analysis and mathematical modelling to determine national scale-up potential. The average cost per successful outcome (early ART retention) will be calculated and compared across arms incrementally.

##### **4.5.2. Data collection techniques and tools**

Costs will be measured from the health care provider. We will use micro-costing methods by first creating an inventory of all the resources used to achieve the observed study outcomes including:

- Standard counseling interactions (staff cadre, training received, duration of interaction and distance from facility travelled where applicable)
- Motivational interviewing interactions (staff cadre, training received, duration of interaction and distance from facility travelled where applicable)
- Provider interactions (staff cadre, training received, duration of interaction and distance from facility travelled where applicable)
- Cost of reminder messages sent (when messages delivered telephonically instead of in person)

For each study patient, the quantity (number of units) of resources used will be determined. Unit costs of resources, which are not human subject data, will be obtained from external suppliers and the site's finance and procurement records and multiplied by the resource usage data to provide an average cost per study patient across centers in each study arm.

##### **4.5.3. Data analysis**

**Cost-Effectiveness:** Using the average cost per patient as described above, we will then estimate the cost per outcome achieved in each arm. The main measure of effectiveness for the cost-effectiveness analysis will be both the primary study outcome (early ART retention). We will calculate the difference in cost divided by the difference in effectiveness among study arms. Costs will be reported as means (standard deviations) and medians (IQRs) in USD, using the exchange rate prevailing during the follow up period.

**National scale-up modeling:** To determine the budget impact and affordability of the intervention arms, we will parameterize a national scale-up model using the study output. To determine the total cost and impact of the three intervention arms, as well as combinations of interventions, we will model cost and impact out to early ART retention (ART initiation and completion of the 4-week ART refill appointment). The following parameters to be estimated from this trial include:

- Percent of men not linking after HIVST (and thus eligible for this trial)



- Proportion of men that have not linked that could be reached
- Proportion of men that are known HIV-positive and on ART (not disclosed to their partner)
- Proportion of men that initiate ART
- Proportion of men that complete the 4-week ART refill appointment

We will then estimate the expected increase in the number of men linked to ART after index HIVST, adjusted by facility type where possible, by each intervention arm. The number of facility-level HIV tests conducted through index testing at all 652 public healthcare facilities in Malawi from Oct 2019-Sept 2020 will be used for these national calculations. Each intervention will be tested separately in this model, as well as different combination of interventions. Different scenarios will be explored where interventions are used at different facilities (urban versus rural targeting of interventions, geospatial targeting of interventions), or different groups of men within the same facility (where data suggest that different demographics of men respond differently to the different interventions).

The national-level costs and expected number of men linked to ART, by each intervention and combinations of interventions, will be reported from this model. We will then contextualize the national cost of each intervention with a short-term 3-year budget impact: percent increase (or decrease) of the national HIV treatment budget with the inclusion of one of these interventions

## 5. ETHICAL CONSIDERATIONS

There is minimal risk associated with the above-mentioned procedures. We have extensive experience measuring ART initiation within HIVST studies. We conducted the first trials in the region to objectively measure ART initiation among men after receiving HIVST through the Index HIVST Trial (PI: Dovel) and PASTAL Trial (male partners of antenatal clients; PI: Choko). We draw from lessons learned from our previous trials.

### *Informed Consent*

Informed consent will be obtained before any study-specific procedures are performed. The informed consent process will include information exchange, detailed discussion, and assessment of understanding of all required elements of informed consent, including the potential risks, benefits, and alternatives to study participation. The process will emphasize the randomized nature of the study and the differences that participants may experience as part of the study relative to current local standards of care. The study will include children 15 years of age and older. Following Malawian protocol, adolescents <18 years of age will be required to attain assent before completing the survey. Based on prior studies, we anticipate <10% of participants to be under 18 years of age, providing a small sample size to explore the potential impact of facility-based testing for youth.

### *Potential Benefits*

Men who participate in the study may have access to additional HIV services not usually provided through routine care, such as appointment reminders, peer navigation, motivational interviewing, and home-based ART initiation. Men can refuse these additional services at any point. Further, both men and women will have the opportunity to discuss their use of HIV services and any concerns with HIV as individuals or as a couple. Information learned in this study may be of benefit to participants and others in the future, particularly information that may lead to optimized testing guidelines.

### *Potential risks and discomforts*

Study procedures have minimal risk to the client. For men, maintaining privacy and confidentiality is a potential risk, particularly with home-based ART initiation. In our prior work delivering routine Index

1  
2  
3 HIVST, we have had health workers visit a cluster of homes (not just one) to avoid unwanted questions  
4 about the individual's serostatus. This has worked quite well, with no reports of unwanted disclosure, and  
5 we will use this approach in our proposed study to minimize risk of unwanted disclosure. Further, men  
6 may refuse any ART service at anypoint if they are uncomfortable.  
7

8 For women, increased intimate partner violence (IPV) may be a potential risk, particularly if their male  
9 partner is prone to violence. To reduce these risks, women who report IPV with their current partner in the  
10 past 12 months will be excluded from the study. Female ART clients who report IPV at anypoint of the  
11 intervention will be withdrawn from the study, along with their male partner, counseled, and referred to  
12 community-based resources for IPV. We also will provide extensive counseling on status disclosure and  
13 an IPV hotline to all female participants. Further, Our PASTAL and Index HIVST Trials show no sign of  
14 increased IPV and we have published extensively on risk factors for IPV in other settings.<sup>71-73</sup>  
15

16 Finally, Participation includes completion of a survey that will assess previous use of health services,  
17 perceptions of health services received, and sociodemographic and biomedical factors that may be  
18 associated with health service utilization. Participants may feel some psychological stress or discomfort  
19 from some of the questions, although most questions are not sensitive in nature. Participants may decline  
20 to answer any questions that make them uncomfortable and may end participation at any time.  
21

#### 22 *Reimbursement/compensation*

23 Participants will be provided MK 7,500 (equivalent to 10USD) for each survey completed (MK 15,000 /  
24 20USD across the duration of the study). They will receive the above compensation regardless if they use  
25 HIV services or not. Those who complete the additional in-depth interview 6-months after study  
26 enrollment will receive an additional MK 7,500 (equivalent to 10USD) for their time.  
27

#### 28 *Privacy and confidentiality*

29 All study procedures will be conducted in private, and every effort will be made to protect participant  
30 privacy and confidentiality to the extent possible. Participant information will not be released without  
31 written permission to do so except as necessary for review, monitoring, and/or auditing. All study-related  
32 information will be stored securely. Participant research records will be stored in locked areas with access  
33 limited to study staff. All study data will be identified by participant ID (PID) only. Likewise,  
34 communications between study staff and protocol team members regarding individual participants will  
35 identify participants by PID only. Process evaluation documents, such as intervention monitoring and  
36 evaluation tools, will only include PID and will not store PID and identifiers together. All local databases  
37 will be encrypted and secured with password-protected access systems. Lists, logbooks, appointment  
38 books, and any other documents that link PID numbers to personal identifying information will be stored  
39 in a separate, locked location in an area with limited access. For the intervention, home visits will be  
40 conducted by health workers who visit a cluster of homes (not just one) at one time in order to avoid  
41 unwanted questions about the individual's serostatus. This has been used in other interventions focused  
42 on partner testing and treatment with high success of removing unwanted disclosure to community  
43 members.  
44  
45  
46

## 47 **6. DISSMINATION OF RESULTS**

48  
49 This study will set the stage for interventions that combine HIVST with differentiated models for early  
50 ART retention in low-resource settings. The study is timely and of high-impact. Findings will establish  
51 the effectiveness of home-based ART among male HIVST users, and can directly inform HIV programs  
52 throughout the region. The dissemination plan was developed to achieve the most impact while still  
53 ensuring dissemination among local stakeholders who may immediately benefit from study findings.  
54

55 Partners in Hope is already integrated into national technical working groups, so dissemination will  
56 follow standard meeting schedules and draw upon Partners in Hope's longstanding history with the  
57  
58  
59

Ministry of Health. Additionally, we will disseminate results through presentations at international scientific meetings and through high-impact peer-reviewed journals. The mentorship team has extensive experience publishing in high-impact journals (e.g., *AJPH*, *AIDS*, *BMJ*, *Lancet HIV*, *JAIDS*, *PLOS Med*)

## 7. PERSONNEL ROLES AND INSTITUTIONS

The proposed research team includes clinical researchers and implementation science professionals with substantial experience in HIV testing, HIV prevention and treatment, cost effectiveness, differentiated care model studies, and male-focused studies and programs in Malawi and Sub-Saharan Africa. The study will be implemented in partnership with Partners in Hope Medical Center in Lilongwe, which has years of experience collaborating with Ministry of Health and local health facilities on similar studies, mentoring staff, and running studies embedded within routine clinical care.

- Kathryn Dovel, MPH, PhD, Principle Investigator, Division of Infectious Disease University of California Los Angeles (UCLA) and Research Director for Partners in Hope
- Thomas Coates, PhD, Co-Investigator, Division of Infectious Disease UCLA
- Risa Hoffman, MPH, MD, Co-Investigator, Division of Infectious Disease UCLA
- Brooke Nichols, Co-Investigator, School of Global Health, Boston University
- Lawrence Long, Co-Investigator, School of Global Health, Boston University
- Alemayehu Amberbir, Co-Investigator, Partners in Hope
- Augustine Choko, PhD, Site Co-Investigator, Malawi Liverpool Wellcome Trust
- Michal Kulich, Biostatistician, Charles University in Prague
- Julie Hubbard, MSc, Study Coordinator, Partners in Hope
- Kelvin Balakasi, Study Data Manager, Partners in Hope
- Khumbo Phiri, Implementation Science Manager, Partners in Hope

Dr. Kathryn Dovel, the Principle Investigator, is the Science Director at Partners in Hope and an Assistant Professor in the Division of Infectious Diseases at UCLA. Dr. Dovel has over ten years of experience in Malawi and collaborating with the study team. She is regularly involved in UNAIDS and WHO workshops and meetings regarding strategies for male engagement, and has been a consultant on two Ministry of Health guidelines on the topic in Malawi.

Dr. Augustine Choko will be responsible with Dr. Dovel for overall adherence to the study protocol and serve as the primary liaison with the local IRB and key stakeholders in Malawi. Dr. Thomas Coates will serve as the community-based trials specialist, with over two decades of experience conducting individual- and cluster-randomized trials in communities with the end goal of engagement in HIV services. Dr. Risa Hoffman is an established clinical investigator and will serve as the MD specializing in differentiated models of ART treatment delivery and HIV care, and ensuring client safety. Brooke Nichols and Lawrence Long will be responsible for reviewing all modeling data, making an analysis plan for the proposed models, and providing modeling for publications. Dr. Michal Kulich is the Chair of the Probability and Statistics Department at Charles University and has extensive experience with the design, conduct, and analysis of clinical trials in the context of HIV prevention research.

Partners in Hope's staff Kelvin Balakasi (Data Manager) Julie Hubbard (Research Coordinator), Khumbo Phiri (Implementation Science Manager) and Alemayehu Amberbir (Science Director) will be responsible implementation and oversight including data collection, data management, quality control, and training and certification of data entry personnel. They will also be responsible for ensuring the intervention promotes client safety, meets Ministry of Health guidelines, and is implemented in such a way to promote sustainability and scalability.

CV's for participating personnel are provided in the Appendix L.



## 8. REGULATORY OVERSIGHT

This study is sponsored by the Bill and Melinda Gates Foundation and implemented through Partners in Hope (PIH), Malawi. PIH staff will perform monitoring visits. As part of these visits, monitors will inspect study-related documentation to ensure compliance with all applicable regulatory requirements.

All health facilities will receive an Initial Registration Notification from PIH that indicates successful completion of the protocol registration process. A copy of the Initial Registration Notification will be retained in the site's regulatory files.

We have developed a trial advisory group. See Table 6 for details about the group members. The group will meet every quarter to review progress, and challenges with study implementation, and provide input on the final interventions to be tested, based on qualitative findings in Aim 1.

*Table 6. Description of trial advisory group*

| Name                 | Affiliation                                                                  | Expertise                                                                                                                                                                   |
|----------------------|------------------------------------------------------------------------------|-----------------------------------------------------------------------------------------------------------------------------------------------------------------------------|
| Dr. Morna Cornell    | University of Cape Town                                                      | Epidemiologist, health system barriers to men's care, men's HIV services, advocacy and policy change                                                                        |
| Dr. Heidi van Rooyen | SA Human Sciences Research Council                                           | Social scientist, HIV vulnerability and inequality, interventions for men's ART initiation                                                                                  |
| Dr. Deborah Donnell  | University of Washington, Fred Hutch Vaccine and Infectious Disease Division | Biostatistician, international HIV trials, PI of the HPTN Statistical and Data Management Center                                                                            |
| Dr. Connie Celum     | University of Washington                                                     | Infectious disease physician and epidemiologist, implementation science in Africa, HIV prevention trials                                                                    |
| Dr. Thoko Kalua      | Malawi Ministry of Health, Deputy Director at Department of HIV and AIDS     | Epidemiologist. Extensive experience in national HIV programs, M&E, and scale-up of interventions on the ground                                                             |
| Dr. Sergio Chicumbe  | Mozambique National Health Institute (INS), Health System Research Cluster   | Clinical trials and implementation science. Extensive experience in national public health programs, methodology for health services research and quality care improvement. |

For any future protocol amendments, upon receiving final IRB/EC and any other applicable regulatory entity approvals, sites should implement the amendment immediately. Sites are required to submit an amendment registration packet to the PIH Protocol Team. PIH key personnel will review the submitted protocol registration packet to ensure that all the required documents have been received.

## 9. STUDY IMPLEMENTATION

Study implementation at each site will be guided site-specific standard operating procedures (SOPs). These SOPs will be updated and/or supplemented as needed to describe roles, responsibilities, and procedures for this study.

## 10. PROTOCOL DEVIATION REPORTING

All protocol deviations will be documented in participant research records. Reasons for the deviations and corrective and preventive actions taken in response to the deviations will also be documented. Deviations will be reported to site IRBs/ECs and other applicable review bodies in accordance with the policies and procedures of these review bodies. Serious deviations that are associated with increased risk to one or more study participants and/or significant impacts on the integrity of study data must also be reported to the Protocol Team as soon as possible.

## 11. WORK PLAN TIMELINE

**Table 7:** Anticipated workplan timeline of study activities, by year

| IdeAL Study Timeline                                                                                               |        |   |   |   |        |   |   |   |        |   |   |   |        |   |   |   |
|--------------------------------------------------------------------------------------------------------------------|--------|---|---|---|--------|---|---|---|--------|---|---|---|--------|---|---|---|
| Activities                                                                                                         | Year 1 |   |   |   | Year 2 |   |   |   | Year 3 |   |   |   | Year 4 |   |   |   |
|                                                                                                                    | 1      | 2 | 3 | 4 | 1      | 2 | 3 | 4 | 1      | 2 | 3 | 4 | 1      | 2 | 3 | 4 |
| Preparation                                                                                                        | X      | X | X | X |        |   |   |   |        |   |   |   |        |   |   |   |
| <b>Objective 1:3. Test the effectiveness of models of varying intensity to link patients who use HIVST to care</b> |        |   |   |   |        |   |   |   |        |   |   |   |        |   |   |   |
| Enrollment                                                                                                         |        |   |   |   | X      | X | X | X |        |   |   |   |        |   |   |   |
| Intervention and follow-up                                                                                         |        |   |   |   | X      | X | X | X | X      | X |   |   |        |   |   |   |
| Follow-up analyses & writing                                                                                       |        |   |   |   |        |   |   |   |        | X | X | X | X      |   |   |   |
| <b>Objective 2: 4. Identify factors associated with early ART retention</b>                                        |        |   |   |   |        |   |   |   |        |   |   |   |        |   |   |   |
| Baseline sociodemographic survey                                                                                   |        |   |   |   | X      | X | X | X |        |   |   |   |        |   |   |   |
| Qualitative assessment- rolling                                                                                    |        |   |   |   | X      | X | X | X | X      | X |   |   |        |   |   |   |
| Analyses & writing                                                                                                 |        |   |   |   |        | X | X |   |        | X | X | X | X      |   |   |   |
| <b>Objective 3: 5. Determine the cost and scalability of the intervention</b>                                      |        |   |   |   |        |   |   |   |        |   |   |   |        |   |   |   |
| Data collection                                                                                                    |        |   |   |   | X      | X | X | X | X      | X |   |   |        |   |   |   |
| Synthesis of results and parameter estimation                                                                      |        |   |   |   |        |   |   |   |        | X |   |   |        |   |   |   |
| Model development                                                                                                  |        |   |   |   |        |   |   |   |        | X | X | X |        |   |   |   |
| Analyses & writing                                                                                                 |        |   |   |   |        |   |   |   |        | X | X | X | X      |   |   |   |

## 12. BUDGET AND JUSTIFICATION

**Table 8:** Study budget

| Description                            | USD   | Justification                                                                                              |
|----------------------------------------|-------|------------------------------------------------------------------------------------------------------------|
| Study Coordinator                      | 5000  | 25% LOE to coordinate RAs                                                                                  |
| Research Assistant for data collection | 15000 | 5 RAs for 6 months at 500 USD per month                                                                    |
| Incentive for participants             | 21720 | 10USD per study visit, 2 study visits per participant, 1086 participants (543 men and 543 female partners) |

|                                     |               |                                                                                                                             |
|-------------------------------------|---------------|-----------------------------------------------------------------------------------------------------------------------------|
| Expert Client/Nurse lunch allowance | 720           | 6USD lunch allowance for 10 Expert Clients and 10 nurses on a monthly basis to hear from them how the intervention is going |
| Telecommunications                  | 1000          | Mobile data collection processing by RAs and communication with coordinator                                                 |
| NHSRC application fee               | 150           | Application fee                                                                                                             |
| <i>Sub Total</i>                    | <i>43,590</i> |                                                                                                                             |
| NHSRC 10% fee                       | 4,359         | 10% contribution fee of study budget                                                                                        |
| <b>Grand total</b>                  | <b>47,949</b> |                                                                                                                             |

### 13. REFERENCES

1. Dovel K, Yeatman S, Watkins S, Poulin M. Men's heightened risk of AIDS-related death: the legacy of gendered HIV testing and treatment strategies. *AIDS (London, England)*. 2015;29(10):1123.
2. UNAIDS. *Ending AIDS: Progress towards 90-90-90 Targets.*; 2017.
3. Choko AT, Kumwenda MK, Johnson CC, et al. Acceptability of woman-delivered HIV self-testing to the male partner, and additional interventions: a qualitative study of antenatal care participants in Malawi. *Journal of the International AIDS Society*. 2017;20(1):21610.
4. Yeatman S, Chamberlin S, Dovel K. Women's (health) work: A population-based, cross-sectional study of gender differences in time spent seeking health care in Malawi. *PLoS one*. 2018;13(12).
5. Mills EJ, Beyrer C, Birungi J, Dybul MR. Engaging men in prevention and care for HIV/AIDS in Africa. *PLoS medicine*. 2012;9(2).
6. Malawi National Statistics Office. *Demographic Health Survey: Malawi.*; 2016.
7. Sharma M, Ying R, Tarr G, Barnabas R. Systematic review and meta-analysis of community and facility-based HIV testing to address linkage to care gaps in sub-Saharan Africa. *Nature*. 2015;528(7580):S77–S85.
8. Partners in Hope. Update on index partner testing in Partners in Hope supported sites: quarterly review. Presented at the: Malawi Ministry of Health Technical Working Group: HIV Self-Testing; 2019.
9. Dovel K, Balakasi K, Shaba F, Phiri K, Offorjebe O, Gupta S. A Randomized trial on index HIV self-testing for partners for ART clients in Malawi. In: *Conference on Retroviruses and Opportunistic Infections, Seattle.* ; 2019.
10. Johnson CC, Kennedy C, Fonner V, et al. Examining the effects of HIV self-testing compared to standard HIV testing services: a systematic review and meta-analysis. *Journal of the International AIDS Society*. 2017;20(1):21594.
11. Masters SH, Agot K, Obonyo B, Mavedzenge SN, Maman S, Thirumurthy H. Promoting partner testing and couples testing through secondary distribution of HIV self-tests: a randomized clinical trial. *PLoS medicine*. 2016;13(11).
12. Ortblad K, Musoke DK, Ngabirano T, et al. Direct provision versus facility collection of HIV self-tests among female sex workers in Uganda: a cluster-randomized controlled health systems trial. *PLoS medicine*. 2017;14(11).
13. MacPherson P, Lalloo DG, Webb EL, et al. Effect of optional home initiation of HIV care following HIV self-testing on antiretroviral therapy initiation among adults in Malawi: a randomized clinical trial. *Jama*. 2014;312(4):372–379.
14. Sibanda EL, Weller IV, Hakim JG, Cowan FM. The magnitude of loss to follow-up of HIV-exposed infants along the prevention of mother-to-child HIV transmission continuum of care: a systematic review and meta-analysis. *AIDS (London, England)*. 2013;27(17):2787.

15. Larsson EC, Thorson A, Nsabagasani X, Namusoko S, Popenoe R, Ekström AM. Mistrust in marriage-Reasons why men do not accept couple HIV testing during antenatal care-a qualitative study in eastern Uganda. *BMC public health*. 2010;10(1):769.
16. Koo K, Makin JD, Forsyth BW. Barriers to male-partner participation in programs to prevent mother-to-child HIV transmission in South Africa. *AIDS Education and Prevention*. 2013;25(1):14–24.
17. Theuring S, Nchimbi P, Jordan-Harder B, Harms G. Partner involvement in perinatal care and PMTCT services in Mbeya Region, Tanzania: the providers' perspective. *AIDS care*. 2010;22(12):1562–1568.
18. Sileo KM, Fielding-Miller R, Dworkin SL, Fleming PJ. What role do masculine norms play in men's HIV testing in sub-Saharan Africa?: a scoping review. *AIDS and Behavior*. 2018;22(8):2468–2479.
19. van den Berg W, Brittain K, Mercer G, et al. Improving men's participation in preventing mother-to-child transmission of HIV as a maternal, neonatal, and child health priority in South Africa. *PLoS medicine*. 2015;12(4).
20. Unaided HIV. *Addressing a Blind Spot in the Response to HIV—Reaching out to Men and Boys*. Joint United Nations Programme on HIV/AIDS Geneva; 2017.
21. Cornell M, Cox V, Wilkinson L. Public health blindness towards men in HIV programmes in Africa. *Tropical Medicine & International Health*. 2015;20(12):1634–1635.
22. Poulin M, Dovel K, Watkins SC. Men with money and the “vulnerable women” client category in an AIDS epidemic. *World Development*. 2016;85:16–30.
23. Pai NP, Sharma J, Shivkumar S, et al. Supervised and unsupervised self-testing for HIV in high-and low-risk populations: a systematic review. *PLOS medicine*. 2013;10(4).
24. Sharma M, Barnabas RV, Celum C. Community-based strategies to strengthen men's engagement in the HIV care cascade in sub-Saharan Africa. *PLoS medicine*. 2017;14(4).
25. Choko AT, MacPherson P, Webb EL, et al. Uptake, accuracy, safety, and linkage into care over two years of promoting annual self-testing for HIV in Blantyre, Malawi: a community-based prospective study. *PLoS medicine*. 2015;12(9).
26. Decroo T, Rasschaert F, Telfer B, Remartinez D, Laga M, Ford N. Community-based antiretroviral therapy programs can overcome barriers to retention of patients and decongest health services in sub-Saharan Africa: a systematic review. *International health*. 2013;5(3):169–179.
27. Wools-Kaloustian KK, Sidle JE, Selke HM, et al. A model for extending antiretroviral care beyond the rural health centre. *Journal of the International AIDS Society*. 2009;12(1):22–22.
28. Apondi R, Bunnell R, Awor A, et al. Home-based antiretroviral care is associated with positive social outcomes in a prospective cohort in Uganda. *JAIDS Journal of Acquired Immune Deficiency Syndromes*. 2007;44(1):71–76.
29. Jaffar S, Amuron B, Foster S, et al. Rates of virological failure in patients treated in a home-based versus a facility-based HIV-care model in Jinja, southeast Uganda: a cluster-randomised equivalence trial. *The Lancet*. 2009;374(9707):2080–2089.

- 1  
2  
3 30. Malterud K, Siersma VD, Guassora AD. Sample size in qualitative interview studies: guided by  
4 information power. *Qualitative health research*. 2016;26(13):1753–1760.  
5  
6  
7  
8  
9  
10  
11  
12  
13  
14  
15  
16  
17  
18  
19  
20  
21  
22  
23  
24  
25  
26  
27  
28  
29  
30  
31  
32  
33  
34  
35  
36  
37  
38  
39  
40  
41  
42  
43  
44  
45  
46  
47  
48  
49  
50  
51  
52  
53  
54  
55  
56  
57  
58  
59  
60

For peer review only

## 14. APPENDIX

### 14.1. APPENDIX A – Study Invitation Cards

---

**STUDY INVITATION CARD**  
**Identifying efficient linkage strategies for HIV self-testing (IDEaL)**  
 English

---

**Study invitation Card**

Date: ...../...../2020

Dear: \_\_\_\_\_

At \_\_\_\_\_, we are conducting a study. The study will generate information that will help the Malawi government, Partners in Hope and other stakeholders develop programs that will help your community lead a healthy life. We are therefore inviting you and your partner to come to \_\_\_\_\_ on \_\_\_\_\_ at \_\_\_\_\_, so that we can assess if you are eligible for the study. If eligible, you and your partner will each receive MK 7,500 (equivalent to 10USD).

Thank you for your kind attention to this request and we look forward to seeing you. When coming call or flash this number..... so that you are met by study personnel.

Sincerely,

[District Health Officer]

---

**STUDY INVITATION CARD**  
**Identifying efficient linkage strategies for HIV self-testing (IDEaL)**  
Chichewa

---

**Khadi Lokuyitanani Ku Kafukufuku**

Tsiku: ...../...../2020

Wokondedwa: \_\_\_\_\_

Ku chipatala cha, \_\_\_\_\_, tikupanga kafukufuku.

Kafukufukuyu adzathandiza kupeza mfundo zomwe zidzathandize boma la Malawi, bungwe la Partners In Hope ndi mabungwe/magulu ena kukhazikitsa ndondomeko zomwe zidzathandizire anthu a mdela lanu kukhala ndi umoyo wanthanzi. Choncho mukuyitanidwa pamodzi ndi okondedwa anu kuti mubwere ku \_\_\_\_\_ tsiku nthawi ya \_\_\_\_\_, ndicholinga choti tidzaone ngati muli oyenera kutenga nawo mbali mu kafukufukuyu. Mukadzapezeka kuti ndinu oyenera kutenga nawo mbali mu kafukufukuyu, inuyo komanso bwenzi lanu mudzalandira K7,500 (yokwana 10USD) aliyense.

Zikomo kwambiri chifukwa cha chidwi chanu pa pempholi ndipo ife tikuyembekezera kuzaonana nanu pa tsikuli. Mukamadzabwera, muzaimbe kapena kufulasha pa nambala iyi.....kuti muzakumane ndi anthu a kafukufukuyu.

Ndine wanu,

[District Health Officer]



## 14.2. APPENDIX B – Recruitment and Screening Script

---

### RECRUITMENT AND SCREENING SCRIPT

#### Identifying efficient linkage strategies for HIV self-testing (IDEaL)

Female

---

Thank you for speaking with me about the study entitled, “*Identifying efficient linkages strategies for HIVST*” conducted by Partners in Hope and the University of California Los Angeles in the United States. You are being approached because you recently reported that your male partner tested HIV-positive using a HIV self-test kit.

The purpose of this is to determine what are the best interventions that can help men who are diagnosed with HIV use other health services, if desired. The study will offer several different strategies for HIV services to see what works best for men who use HIV self-testing kits.

Would you be interested in participating in the eligibility screening to see if you are eligible to participate in the study? Your participation is voluntary and you will not be penalized if you choose not to participate in the screening or the project.

*[If no, thank the person and end the session]*

*[If yes, continue to the screening questions below or make an appointment to complete the screening questions]*

Before we continue with the study, we first need to determine if you are eligible to participate.

1. Are you and your partner 15 years old or older?
2. To the best of your knowledge, did your partner recently test HIV-positive using a HIV self-test kit?
3. To the best of your knowledge, your partner currently NOT taking ART?
4. Does your partner live in the facility catchment area?
5. In the last 30 days, your current partner has NEVER hit, slapped, or kicked you, or forced you to have sexual intercourse with them?

If you answered yes to all these questions, then you are eligible to participate in the study. You may stay here to continue with the study consent, and we will explain how the study will be conducted.

---

**RECRUITMENT AND SCREENING SCRIPT**  
**Identifying efficient linkage strategies for HIV self-testing (IDEaL)**  
Female (Chichewa)

---

*Zikomo kwambiri povemera kucheza nane zokhudza study yotchedwa “Kupeza njira zabwino zothandizira anthu omwe akulandira ma ARV” amene akupangidwa ndi bungwe la Partners In Hope-EQUIP polojekiti ndi sukulu ya ukachenjede ya University of California Los Angeles yaku Amerika. Mukufunsidwa kuti mutenge nawo mbali mu gawo lakafukufukuyu chifukwa bwenzi lanu lalimuna lili ndi kachiroombo ka HIV ndipo linadziwa zotsatirazi pogwiritsa ntchito ka chida koziyezera wekha.*

*Cholinga cha kafukufukuyu ndi kufuna kupeza njira zabwino zomwe zingathandize azibambo omwe ali ndi kachiroombo ka HIV kugwiritsa ntchito thandizo lina la zaumoyo, ngati akonda kutero. Studyyi idzapeleka njira zingapo zosiyanasiyana za thandizo la HIV kuti awone njira yomwe ikugwira bwino kwa azibambo omwe amagwiritsa nchito ka chida koziyezera wekha HIV.*

*Kodi muli okondwa kutenga nawo mbali mu mayele ofuna kuwona ngati muli oyenela kutenga nawo mbali mu study? Kutenga nawo mbali kwanu ndi kosakakamiza ndipo palibe chilango chilichonse ngati mungasankhe kusatenga nawo mbali mu mayele a study.*

*[Ngati ayi, thokozani munthuyo ndipo malizani session]*

*[Ngati eya, pitilizani kufunsa mafunso a mayele omwe ali munsiwa kapena sankhani tsiku loti muzamalize kufunsa mafunso]*

*Tisanapitilize ndi study, choyamba tifuna tidziwe ngati muli oyenera kutenga nawo mbali.*

- 1. Muli ndi zaka khumi ndi zisanu kapena kuposela apo?*
- 2. Monga mukudziwira kodi bwenzi lanu laziyezera kachida koziyezera wekha ndikupezeka ndi kachiroombo ka HIV?*
- 3. Monga mene mukudziwira, kodi pakadali pano bwenzi lanu likumwa mankhwala a ma ARV?*
- 4. Kodi bwenzi lanu limakhala mu dela lozungulira chipatala?*
- 5. M' masiku makumi atatu apitawa, bwenzi lanu SILINAPANGE izi kumenyani kapena kukakamizani kuti mugonane nalo?*

*Ngati mwayankha eya pa mafunso onse mwafunsidwawa, zikusonyeza kuti ndinu oyenera kutenga nawo mbali mu study. Muli omasuka kukhala ndikupitiliza chilolezo cha study, ndipo ndikufotokozerani za momwe study ichitikire.*

---

**RECRUITMENT AND SCREENING SCRIPT**  
**Identifying efficient linkage strategies for HIV self-testing (IDEaL)**  
Male

---

Thank you for speaking with me about the study entitled, “*Identifying efficient linkages strategies for HIVST*” conducted by Partners in Hope and the University of California Los Angeles in the United States. You are being approached because you recently reported testing HIV-positive using a HIV self-test kit.

The purpose of this is to determine what are the best interventions that can help men who are diagnosed with HIV use other health services, if desired. The study will offer several different strategies for HIV services to see what works best for men who use HIV self-testing kits.

Would you be interested in participating in the eligibility screening to see if you are eligible to participate in the study? Your participation is voluntary and you will not be penalized if you choose not to participate in the screening or the project.

*[If no, thank the person and end the session]*

*[If yes, continue to the screening questions below or make an appointment to complete the screening questions]*

Before we continue with the study, we first need to determine if you are eligible to participate.

1. Are you 15 years old or older?
2. You recently test HIV-positive using a HIV self-test kit?
3. You are NOT currently taking ART?
4. Do you live in the facility catchment area?

If you answered yes to all these questions, then you are eligible to participate in the study. You may stay here to continue with the study consent, and we will explain how the study will be conducted.

---

**RECRUITMENT AND SCREENING SCRIPT**  
**Identifying efficient linkage strategies for HIV self-testing (IDEaL)**  
Male (Chichewa)

---

*Zikomo kwambiri povemera kucheza nane zokhudza study yotchedwa “Kupeza njira zabwino zothandizira anthu omwe akulandira ma ARV” amene akupangidwa ndi bungwe la Partners In Hope-EQUIP polojekiti ndi sukulu ya ukachenjede ya University of California Los Angeles yaku Amerika. Mukufunsidwa kuti mutenge nawo mbali mu gawo lakafukufukuyu chifukwa muli ndi kachiroombo ka HIV ndipo munadziwa zotsatirazi pogwiritsa ntchito ka chida koziyezera wekha.*

*Cholinga cha kafukufukuyu ndi kufuna kuoza njira zabwiino zomwe zingathandize azibambo omwe ali ndi kachiroombo ka HIV kugwiritsa ntchito thandizo lina la zaumoyo, ngati akonda kutero. Studyyi idzapeleka njira zingapo zosiyanasiyana za thandizo la HIV kuti awone njira yomwe ikugwira bwino kwa azibambo omwe amagwiritsa nchito ka chida koziyezera wekha HIV.*

*Kodi muli okondwa kutenga nawo mbali mu mayele ofuna kuwona ngati muli oyenela kutenga nawo mbali mu study? Kutenga nawo mbali kwanu ndi kosakakamiza ndipo palibe chilango chilichonse ngati mungasankhe kusatenga nawo mbali mu mayele a study.*

*[Ngati ayi, thokozani munthuyo ndipo malizani session]*

*[Ngati eya, pitilizani kufunsa mafunso a mayele omwe ali munsiwa kapena sankhani tsiku loti muzamalize kufunsa mafunso]*

*Tisanapitilize ndi study, choyamba tifuna tidziwe ngati muli oyenera kutenga nawo mbali.*

- 1. Muli ndi zaka khumi ndi zisanu kapena kuposela apo?*
- 2. Kodi mwaziyezera kachida koziyezera wekha ndikupezeka ndi kachiroombo ka HIV?*
- 3. Kodi pakadali pano mukumwa mankhwala a ma ARV?*
- 4. Kodi mumakhala mu dela lozungulira chipatala?*

*Ngati mwayankha eya pa mafunso onse mwafunsidwawa, zikusonyeza kuti ndinu oyenera kutenga nawo mbali mu study. Muli omasuka kukhala ndikupitiliza chilolezo cha study, ndipo ndikufotokozerani za momwe study ichitikire.*

### 14.3. APPENDIX C – Written Informed Consent- Female

---

#### WRITTEN INFORMED CONSENT Identifying efficient linkage strategies for HIV self-testing (IDEaL) Female

---

You are asked to participate in a research study entitled “*Identifying efficient linkages strategies for HIVST*” conducted by Partners in Hope and the University of California Los Angeles in the United States. You are being requested to take part in the study because you recently reported that your male partner tested HIV-positive using a HIV self-test kit. Your participation in this study is entirely voluntary. You will be read the information below, and you are free to ask questions about anything you do not understand, before deciding whether or not to participate. ***I as the field assistant for this study will take you through this consenting process.***

- **Why is this study being done?**

HIV self-testing is very helpful for people who want to know their status but do not usually go to the health facility. However, it can be hard for individuals who test HIV-positive with HIV self-testing to be able to access other health services. Researchers want to determine what are the best interventions that can help men who are diagnosed with HIV use other health services, if desired. The study will offer several different strategies for HIV services to see what works best for men who use HIV self-testing kits.

- **What will happen if you take part in this research study?**

There are several steps to this study. if you volunteer to participate in this study you will have the opportunity to participate in the following components:

1. Allow me to trace your male partner, or take me to your male partner in order to invite him to participate in the study as well. Note, you can choose to participate in the study even if your partner refuses or you think your partner would refuse.
2. Complete one or two study visits where a research assistant like myself will interview you and ask you information about yourself, including whether you are married, number of sexual partners, your level of education, information about your experiences with HIV services, and how you feel about HIV testing and treatment services. We will ask you questions today (or a day nearby that is convenient for you) and, if your partner enrolls in the study, we will ask you similar questions again in four months in order to see if anything has changed. Each interview will last about 45minutes. You can refuse a follow-up survey at any point

3. If your partner agrees to participate in the study, he will be randomized to one of three interventions. We will do the randomization together with him so he can see exactly what intervention he will be offered. The potential interventions are:

- 1) Standard of care where providers may send him reminders about the benefits of health services.
- 2) Motivational Interviewing where he can talk to someone about his life, challenges he faces, and strategies to make his life better and additional services as needed.
- 3) Home-based health services whereby a provider will offer him HIV services and NCD screening at your home as a one-time event. He will then be visited after 4-weeks to be escorted to the clinic if desired.

Regardless of what arm your partner is randomized to, he can always refuse health services or refuse talking to a health care provider and still remain in the study. You can remain in the study regardless of what your partner does.

4. Finally, you may be randomly selected to within 6-months of the study to complete a 1-hour in-depth interview so we can learn more about your experiences in the study. Not all participants will be contacted for the interview and you always have the right to decline an in-depth interview – refusal will not affect your participation in the larger study.

- **How long will you be in the research study?**

All study activities will be completed within 6-months of today.

- **Are there any potential risks or discomforts that you can expect from this study?**

You will be asked a series of questions by a research assistant about your sexual relationship and your perceptions of your partners use of HIV and other health services. We will NEVER disclose your HIV status to your partner. We will NEVER disclose to your partner that you told us he had tested HIV+. However, you may feel uncomfortable answering some questions asked during the interview or you may feel comfortable having your partner in the study. You are able to withdraw from the study at any time. During an interview you can say “I don’t want to answer” to any questions that make you uncomfortable. All questions will be asked in a private place so that no one else will hear your answers.

If you experience distress or adverse events as a result of the study, we will provide you with counseling resources or refer you to resources for assistance.

- **Are there any potential benefits to participating?**

You will have the opportunity to discuss information about your well-being, your relationship with your partner, and HIV services for men with a Research Assistant in a confidential, private manner.

- **Are there any potential benefits to society?**

Information obtained as part of this work may be of benefit to the larger Malawi program, or similar programs in sub-Saharan Africa, since the work aims to determine if there are better ways to offer HIV services to men who use HIV self-test kits. If researchers better understand what

1  
2  
3 type of programs work better for men, the program in Malawi can be scaled up and strengthened  
4 to provide these specific types of increased support.  
5

6 **• Will you receive payment for being part of this study?**

7  
8 Your participation is entirely voluntary. You will be provided MK 7,500 (equivalent to 10USD)  
9 for each survey completed (MK 15,000 / 20USD across the duration of the study). You will  
10 receive the above compensation regardless if you use HIV services or not. Those who complete  
11 the additional in-depth interview 6-months after study enrollment will receive an additional MK  
12 7,500 (equivalent to 10USD) for their time.  
13

14  
15 **• What is the cost of participating in this study?**

16 There is no cost to participate in this study.  
17  
18

19  
20 **• Will information about me be kept confidential?**

21  
22 The study team are the only people who will know about you or any information that you  
23 provide in this study. If necessary to protect your rights or welfare (for example, if you are  
24 injured and need emergency care) or if required by Malawian law, specific information about  
25 you may be made available to providers or officials.  
26

27 Authorized representatives of the Malawi National Health Sciences Research Council who are  
28 responsible for ensuring the rules related to research are followed, may need to review records of  
29 study participants. As a result, they may see your name; but they will not to reveal your identity  
30 to others.  
31

32 When the results of the research are published or discussed in meetings, no information will be  
33 included that would reveal your identity. Any paperwork related to the study which contains  
34 information about you will be kept in a locked cabinet in a locked office. Only staff members of  
35 the study will have access to this information. A code will be assigned to each individual  
36 participating in the study. This code will be stored on a computer in a locked file. The key to  
37 unlock the information will only be known by the research staff. All data entered into a  
38 computer will be entered using this code so information will no longer have any information that  
39 can identify you such as your name. Forms containing any identifying information will be  
40 destroyed two years after the study is finished.  
41  
42

43 **• Participation and Withdrawal**

44  
45 Your participation in this research is VOLUNTARY. If you choose not to participate, that will  
46 not affect your relationship with the hospital, your health provider or health centre you usually  
47 get your medical care from, or your right to health care. If you decide to participate, you are free  
48 to withdraw your consent and stop your participation at any time and can still receive future  
49 health care at the hospital or health center you go to.  
50

51 **• Withdrawal of Participation by the Investigator**

52  
53 The research investigator may stop your participation in this research if he or she feels this is  
54 best for you. The investigators will make the decision and let you know if it is not possible for  
55 you to continue. The decision may be made to protect your health and safety.  
56  
57  
58  
59  
60



1  
2  
3 • **Who can answer questions I might have about this study?**  
4

5 In the event of a research related injury or if you experience a problem, please immediately  
6 return to the hospital or health centre you go to or contact Khumbo Phiri. The NHSRC Ministry  
7 of Health information (Dr. Mitambo) is also provided in case you have questions about your  
8 rights as a research participant.  
9

10 Kusiyitsidwa kutenga nawo mbali mu kafukufuku ndi wakafukufuku

11 Anthu opangitsa kafukufukuyu akhonza kukuletsani kutenga nawo mbali mukafukufukuyu  
12 akaona kuti ndi bwino kuti mutero. Anthu akafukufukuwa azapanga chiganizochi  
13 ndikukudziwitsani kuti sizitheka kuti mupitirize. Chiganizochi chitha kupangidwa kuti ateteze  
14 thanzi ndi chitetezo chanu.  
15

16 Investigator

17 Khumbo Phiri  
18 Mobile: +265999840946  
19 Partners in Hope Clinic  
20 Area 36, Plot8  
21 M1 Road South  
22 Lilongwe, Malawi  
23  
24

25 OR

26 Dr.C. Mitambo  
27 The Secretariate, NHSRC  
28 Ministry of Health  
29 P.O Box 30377  
30 Lilongwe 3  
31 Cell +265888344 443  
32  
33  
34  
35

36 **SIGNATURE OF RESEARCH SUBJECT [OR LEGAL REPRESENTATIVE]**  
37

38 I have read (or someone has read to me) the information provided above. I have been given an  
39 opportunity to ask questions and all of my questions have been answered to my satisfaction. I have been  
40 given a copy of this form.  
41

42 Ndawerenga (kapena munthu wina wandiwerengera) zonse zalembedwa mwambamu. Ndapatsidwa  
43 mwayi wofunsa mafunso ndi mafunso onse ndinafunsa ayankhidwa ndipo ndakhutusidwa. Ndapasidwa  
44 pepala ina yangati yomweyi.  
45

46 **BY SIGNING THIS FORM, I WILLINGLY AGREE TO PARTICIPATE IN THE RESEARCH:**  
47

48 \_\_\_\_\_  
49  
50 Name of Subject  
51

52 \_\_\_\_\_  
53  
54 Name of Legal Representative (if applicable)  
55  
56  
57  
58  
59  
60

Fingerprint





---

**WRITTEN INFORMED CONSENT**  
**Identifying efficient linkage strategies for HIV self-testing (IDEaL)**  
 Female (Chichewa)

---

Mukufunsidwa kuti mutenge nawo mbali mu gawo lino la kafukufuku wotchchedwa”kupeza njira zoyenera zobwezeletsa anthu pa thandizo la ma ARV” amene akupangidwa ndi bungwe la Partners In Hope-EQUIP polojekiti ndi sukulu ya ukachenjede ya University of California Los Angeles yaku Amerika. Mukufunsidwa kuti mutenge nawo mbali mu gawo lakafukufukuyu chifukwa bwenzi lanu lalimuna linapezeka ndi kachiroambo ka HIV pogwiritsa ntchito kachida koziyezela wekha HIV. Kutenga nawo mbali mukafukufuku ameneyi sikokakamiza. Tikuwerengerani uthenga omwe walembedwa pansipa, ndipo muli oloedwa kufunsa mafunso aliwonse pa zomwe simukumvetsetsa, musanapange chiganizo chotenga nawo mbali kapena ayi. *Ine ngati othandizira mukafufuku ameneyu ndikuthandizani pa ndondomeko yotenga chilolezo.*

• **Chifukwa chiyani kafukufukuyu akuchitika?**

Kuziyeza wekha HIV ndi kofunika kwa anthu omwe akufuna kudziwa za momwe mthupi mwawo mulili ku mbali ya HIV koma sapita kuchipatala, kotelo, ndikovuta kwa anthu omwe apezeka ndi HIV kudzela chipangizo choziyezela wekha kuti apeze thandizo la zaumoyo. Akafukufuku akufuna apeze njira zabwino zomwe zingathe kuthandiza azibambo omwe apezeka ndi HIV kuti agwiritse ntchito thandizo lina lazaumoyo ngati angakonde kutero. Kafukufukuyu apeleka mwayi wa njira zosiyana siyana zothandizira HIV kuti aone zomwe zingagwire ntchito bwino kwa azibambo omwe amagwiritsa ntchito ka chida koziyezela wekha HIV.

• **Chichitike ndi chani mukatenga nawo mbali mu kafukufukuyu?**

Pali ma gawo angapo omwe adzachitike mukafukuku, Ngati mungazipereke kutenga nawo mbali mu kafukufukuyu mudzatenga nawo mbali mu magawo otsatirawa:

1. Mundilole kuti ndifufuze bwenzi lanu lalimuna kapena ndipelekezeni kwa bwenzi lanu lalimuna ndi cholinga choti nalonso litenge nawo gawo mu kafukufuku. Chidziwitso: muli omasuka kutenga nawo mbali mu kafukufu ngati bwenzi lanu lakana kutenga nawo mbali kapena mukuganiza kuti bwenzi lanu likana.
2. Pamapepo pa kucheza koyamba komanso kachiwiri othandiza kafukufuku ngati ine ndidzacheza nanu ndikufunsi mafunso okhuza inuyo, kuphatikizapo ngati muli pa banja, muli ndi abwenzi ogonana nawo angati, maphunziro anu komanso zomwe munakumana nazo polandira thandizo la HIV komanso momwe mumnvera kumbali ya thandizo la HIV angakhalenso kuyezedwa HIV. Tikufunsi mafunso lelo (Ngati lelo muli okonzeka kuyankha mafunsi)komanso miyezi inayi ikudzayi kuti tiwone ngati pali chomwe chasintha, kucheza kuli konse kuzitenga nthawi yosachepela makumi anayi ndi isanu. Muli oloedwa kukana kutenga nawo mbali mu kucheza kotsatira nthawi iliyonse.
3. Ngati bwenzi lanu lidzatenge nawo mbali mu study, adzaikidwa mu gulu limodzi mwa magulu atatu mwa mayere. Tidzachita mayere limodzi ndi bwenzi lanu kuti awone kuti ali ‘gulu liti mwa magulu atatuwa. Maguluwa ali motere:

- 1) Chikumbutso cha ubwino wa thandizo la zaumoyo
- 2) Kucheza kwa chilimbitso komwe mungathe ndi mwayi ocheza ndi anthu ena ndi kuwafotokozela za umoyo wanu, zofuta zomwe mumakumana nazo komanso njira zomwe mumagwiritsa ntchito kuti moyo wanu ukhale wosavuta.
- 3) Thandizo la zaumoyo lomwe mumatha kulandira pakhomo monga thandizo la HIV komanso NCD lomwe mumalandila kamodzi. Pakatha masaba anayi mudzayendeledwa ndi wa zaumoyo yemwe adzakupelekezeni ku chipatala komwe mukapitilize kulandira thandizo ngati mwakonda kutelo.

Posatengera njira yomwe mwapatsidwa mongathe kukana kulandira thandizo la zaumoyo koma ndikupitiliza kutenga nawo mbali mu kafukufuku ndipo tingathe kupitilizabe kucheza komwe tatchula m' mwambamu.

4. Pamapeto tidzakuyendelani pakutha kwa miyezi isanu ndi umodzi ya kafukufuku kuti tidzacheze nanu komanso kuti tidzanve za momwe mukunvera za kafukufuku, maganizo anu okhudza njira zina za mtsogolo komanso, thandizo lina lowonjezera ngati ilipo. Si onse otenga nawo mbali omwe adzaonedwe ndipo muli oloedwa kukana kutenga nawo mbali mukucheza ndipo kukana kwanu sikudzaononga mwayi wanu otenga nawo mbali mu study.

- **Mutenga nthawi yaitali bwanji muli mukafukufuku?**

Zochitika zonse zakafukufuku zizamalizidwa mu miyezi isanu ndi imodzi.

- **Pali zinthu zosowetsa mtendere kapena zodetsa nkhwana zomwe mungayembekezere kuchokera mu kafukufukuyu?**

Mufunsidwa mafunso angapo ndi opangitsa kafukufuku okhudza maubwenzi anu ogonana komanso maganizo anu pa momwe abwenzi anu amagwiritsira thandizo la HIV ndi mathandizo ena a zaumoyo. SITIDZAULULA momwe mthupi mwanu muliri kumbali ya kachilombo ka HIV kwa bwenzi lanu. SITIDZAULURA kwa bwenzi lanu kuti munatiuza kuti ali ndi kachilombo ka HIV. Ngakhale zili choncho, mukhoza kusamasuka kuyankha mafunso ena mu kafukufuku kapenanso mukhoza kufuna kuti bwenzi lanu likhale nanu poyankha mafunsowa. Muli ndi ufulu osiya kutenga nawo gawo mu kafukufuku nthawi iliyonse. Mkati mwa kucheza kwathu, mukhoza kunena kuti “Sindikufuna kuyankha” ku funso lililonse lomwe sindinu omasuka kuyankha. Mafunso onse afunsidwa malo oduka mphepo kuti munthu wina aliyense asamve mayankho anu.

Ngati mungapeze mavuto kapena nkhwana mu mtima kamba kotenga nawo gawo mu kafukufukuyu, tikupatsani uphungu oyenera kapena kukulozerani koyenera kupeza thandizo.

- **Pali cholowa chilichonse potenga nawo mbali mukafukufukuyu?**

Mudzakhala ndi mwayi okambilana ndikunva zambiri zokhudza moyo wanu komanso thandizo la HIV ndi othandiza kafukufuku komanso dotolo munjira yachinsisi. Mudzakhalanso ndi mwayi oyamba mankhwala a ma ARV ku chipatala cha kufuna kwanu.

- **Pali cholowa chilichonse kwa anthu a mudera?**

Uthenga womwe udzatengedwe ngati mbali imodzi yakafukufukuyu uzakhala othandiza mu mapologalamu a dziko la Malawi, kapena ma pologalamu ena ofananirapo a kum' mwera kwa Africa, chifukwa choti ntchito imeneyi ikufuna kuona ngati pali njira yabwino yopeleka thandizo la HIV mwa

azibambo, ma pologalamu aku Malawi azapita patsogolo ndikulimbikitsa njira zopititsira patsogolo.

- **Kodi mulandira malipiro potenga nawo mbali mukafukufukuyu?**

Kutenga nawo mbali kosakakamiza. Mudzalandira chiongola dzanja cha ndalama zokwana 7,500(Pafupifupi MK 15,000/20USD). Mudzalandira ndalamazi olo mutakhala kuti simunatenge nawo kapena mwatenga nawo mbali mu thandizo la HIV. Kwa omwe adzamalize nawo kucheza kowonjezera patatha miyezi isanu ndi umodzi adzalandira ndalama yowonjezera yokwana MK 7,500 (yokwana pafupi fupi 10 USD0 chifukwa cha nthawi yawo.

- **Kodi pali kulipira kulikonse chifukwa chotenga nawo mbali mukafukufukuyu?**

Kutenga nawo mbali mukafukufukuyu ndi kwaulere.

- **Kodi uthenga wanga uzasungidwa mwa chinsinsi?**

Anthu ogwira nawo ntchito mu kafukufuku okhawo ndi amene adziwe za uthenga wanu kapena chilichonse chomwe mutiuze pa kafukufukuyu.

Anthu ovomerezeka oyimirira bungwe la National Health Sciences Research Council ndi UCLA office for Protection Of Research Subjects ndi amene ali ndi udindo wootsetsa kuti malamulo a kafukufuku akutsatidwa, akhoza kufuna kuona nawo kaundula wa anthu amene akutenga nawo mbali mukafukufukuyu. Kutanthauza kuti akhonza kuzaona dzina lanu; koma sangaulure zokhuza inu kwa anthu ena.

Pa nthawi imene zotsatira za kafukufukuyu zidzatsindikidwa kapena kukambidwa mu misonkhano, palibe uthenga womwe udzayikidwe wokuzindikiritsani. Uthenga uliwonse wolembedwa pa pepala wokhunza inu uzasungidwa mu kabati yokhoma mu ofesi yokhomanso. Anthu ogwira nawo ntchito mukafukufukuyu okhawo ndi amene azathe kuona uthenga umenewu. Njira yotanthauzira uthenga umenewu izadziwika ndi anthu akafukufukuyu basi. Uthenga onse olowetsedwa pa makina a kompyuta uzalowetsedwa kugwiritsa ntchito nambala, ndekuti uthenga onse sudzakhanso ndi zokuzindikiritsani monga dzina lanu. Ma pepala amene pali uthenga okuzindikitsani adzawonongedwa pakapita zaka ziwiri chimalizireni kafukufukuyu.

- **Kutenga mbali ndi kusiya kutenga mbali**

Kutenga nawo mbali mu kafukufukuyu SIKOKAKAMIZA. Ngati musankhe kuti simutenga nawo mbali, izi sizingasokoneze ubale wanu ndi chipatala chino, anthu ogwira ntchito kuchipatala, kapena chipatala chomwe mumalandilirako chithandizo, kapena ufulu wanu wolandira thandizo la chipatala. Ngati mwapanga chisankho chotenga nawo mbali, mukhoza kuchosa chilolezo chanu ndikusiya kutenga nawo mbali nthawi ina iliyonse ndipo mungathe kuzalandirabe chithandizo pa chipatala pano mtsogolo.

- **Kusiyitsidwa kutenga nawo mbali mu kafukufuku ndi wakafukufuku**

Anthu opangitsa kafukufukuyu akhonza kukuletsani kutenga nawo mbali mukafukufukuyu akaona kuti ndi bwino kuti mutero. Anthu akafukufukuwa azapanga chiganizochi ndikukudziwitsani kuti sizitheka kuti mupitirize. Chiganizochi chitha kupangidwa kuti ateteze thanzi ndi chitetezo chanu.

1  
2  
3 • **Angayankhe ndi ndani mafunso amene ndingakhale nawo wokhuza kafukufukuyu?**  
4

5 Zitachitika kuti mwavulala kamba ka kafukufukuyu kapena mukukumana ndi vuto, chonde bwelerani  
6 mwachangu kuchipatala chomwe munapitako kapena lumikizanani ndi Mike Nyirenda. Bungwe la  
7 NHSRC Ministry of Health information kudzera mwa Dr Kathyola liliponso ngati mungakhale ndi  
8 mafunso okhudza ufulu wanu ngati munthu wotenga nawo mbali mu kafukufuku.  
9

10  
11 Investigator  
12 Khumbo Phiri  
13 Mobile: +265999840946  
14 Partners in Hope Clinic  
15 Area 36, Plot8  
16 M1 Road South  
17 Lilongwe, Malawi  
18

19  
20 OR

21 Dr.C. Mitambo  
22 The Secretariate, NHSRC  
23 Ministry of Health  
24 P.O Box 30377  
25 Lilongwe 3  
26 Cell +265888344 443  
27  
28  
29

30 **SAYINI YA OTENGA NAWO MBALI [KAPENA YA OYIMIRA OTENGA NAWO MBALI]**  
31

32 Ndawerenga (kapena munthu wina wandiwerengera) zonse zalembedwa mwambamu. Ndapatsidwa  
33 mwayi wofunsa mafunso ndi mafunso onse ndinafunsa ayankhidwa ndipo ndakhutusidwa.  
34 Ndapasidwa pepala ina yangati yomweyi.  
35

36 POSAYINA PA PEPALALI, NDIKUVOMERA MOSAKAKAMIZIDWA KUTENGA NAWO  
37 MBARI MU KAFUKUFUKU:  
38  
39

40 \_\_\_\_\_  
41 Name of Subject  
42  
43

44 \_\_\_\_\_  
45 Name of Legal Representative (if applicable)  
46  
47

48  Fingerprint  
49

50 \_\_\_\_\_ DATE (DAY/MO/YR): \_\_\_\_\_  
51

52 Signature of Subject or Legal Representative  
53

54 (may place an X OR fingerprint if unable to sign)  
55  
56  
57  
58  
59  
60

**SAYINI YA OFUNSA MAFUNSO**

Ndamufotokozero otenga nawo mbali/oyimirira otenga nawo mbali za kafukufukuyu ndipo ndayankha mafunso onse amene anali nawo. Ndikukhulupirira kuti amvetsetsa uthenga onse omwe uli chikalata cha uthengawu ndipo avomera kutenga nawo mbali mwa kufuna kwao.

\_\_\_\_\_

Dzina la ofunsa mafunso kapena oyimira akafukufuku

\_\_\_\_\_

Sayini ya ofunsa mafunso kapena oyimira akafukufuku

\_\_\_\_\_

Date (must be the same as subject's)

#### 14.4.APPENDIX D: Written Informed Consent – Male

---

### WRITTEN INFORMED CONSENT

#### Identifying efficient linkage strategies for HIV self-testing (IDEaL)

##### Male

---

You are asked to participate in a research study entitled “*Identifying efficient linkages strategies for HIVST*” conducted by Partners in Hope and the University of California Los Angeles in the United States. You are being requested to take part in the study because you recently received a self-test kit and reported recently testing HIV-positive. Your participation in this study is entirely voluntary. You will be read the information below, and you are free to ask questions about anything you do not understand, before deciding whether or not to participate. *I as the field assistant for this study will take you through this consenting process.*

- **Why is this study being done?**

HIV self-testing is very helpful for people who want to know their status but do not usually go to the health facility. However, it can be hard for individuals who test HIV-positive with HIV self-testing to be able to access other health services. Researchers want to determine what are the best interventions that can help men who are diagnosed with HIV use other health services, if desired. The study will offer several different strategies for HIV services to see what works best for men who use HIV self-testing kits.

- **What will happen if you take part in this research study?**

There are several steps to this study. If you volunteer to participate in this study you will have the opportunity to participate in the following components:

1. Complete two study visits where a research assistant like myself will interview you and ask you information about yourself, including whether you are married, number of sexual partners, your level of education, information about your experiences with HIV services, and how you feel about HIV testing and treatment services. We will ask you questions today (or a day that is convenient for you) and in four months in order to see if anything has changed. Each interview will last about 45minutes. You can refuse a follow-up survey at any point.
2. After completing the first interview you will be randomized to one of three interventions. We will do the randomization together so you can see exactly what you will be offered. Based on what intervention you are randomly selected for, you will also be offered a variety of health services from health facility staff. The potential interventions are:
  - a) Reminders about the benefits of health services;
  - b) Motivational Interviewing where you can talk to someone about your life, challenges you face, and strategies to make your life and better, and additional services as needed
  - c) Home-based health services whereby a provider will offer you HIV services and NCD screening at your home as a one-time event. After four weeks, you will be visited by a health care worker who will escort you to the clinic for continued health services if desired.

Regardless of what arm you are randomized to, you can always refuse health services or refuse talking to a health care provider and still remain in the study. Even if you do not plan to use any additional



1  
2  
3 health services, don't worry, you can still be in the study and we can still complete the interviews we  
4 discussed above.  
5

6 3. In the first 6 months of the study, we will also review medical records at your local health facility to  
7 see if you visited the health facility since enrolling in the study. This does not require interaction  
8 with you and will be completely confidential.  
9

10 4. Finally, we may contact you within 6-months of the study to complete another in-depth interview so we  
11 can learn more about your experience with the study, recommendations for future interventions, and  
12 what additional services, if any, you would like. Not all participants will be contacted for the  
13 interview and you always have the right to decline an in-depth interview – refusal will not affect  
14 your participation in the larger study.  
15

16 • **How long will you be in the research study?**

17 All study activities will be completed within 6-months of today.  
18

19 • **Are there any potential risks or discomforts that you can expect from this study?**

20 You will be asked a series of questions by a research assistant about your sexual history and your  
21 experience receiving and using a self-test kit from your sexual partner. You may feel uncomfortable  
22 answering some of the questions asked by the interviewer. You can say “I don't want to answer” to any  
23 questions that make you uncomfortable. All questions will be asked in a private place so that no other  
24 patients or staff will hear your answers.  
25

26 If you agree to participate in the assigned intervention, providers may ask to reach you at home or in the  
27 community. As with any health service, if you choose to initiate ART you may be at risk of unwanted  
28 status disclosure.  
29

30 If you experience distress or adverse events, we will provide you with counseling resources or refer you  
31 to resources for assistance.  
32

33 • **Are there any potential benefits to participating?**

34 You will have the opportunity to discuss information about your well-being and HIV services with a  
35 Research Assistant and possibly a health care provider and in a confidential, private manner. You will  
36 also have the chance to link to HIV care services at the facility of your choosing.  
37

38 • **Are there any potential benefits to society?**

39 Information obtained as part of this work may be of benefit to the larger Malawi program, or similar  
40 programs in sub-Saharan Africa, since the work aims to determine if there are better ways to offer HIV  
41 services to men who use HIV self-test kits. If researchers better understand what type of programs work  
42 better for men, the program in Malawi can be scaled up and strengthened to provide these specific types  
43 of increased support.  
44

45 • **Will you receive payment for being part of this study?**

46 Your participation is entirely voluntary. You will be provided MK 7,500 (equivalent to 10USD) for each  
47 survey completed (MK 15,000 / 20USD across the duration of the study). You will receive the above  
48 compensation regardless if you use HIV services or not. Those who complete the additional in-depth  
49 interview 6-months after study enrollment will receive an additional MK 7,500 (equivalent to 10USD) for  
50 their time.  
51

52 • **What is the cost of participating in this study?**

53 There is no cost to participate in this study.  
54  
55  
56  
57  
58  
59  
60

1  
2  
3  
4  
5 • **Will information about me be kept confidential?**

6 Authorized representatives of the Malawi National Health Sciences Research Council who are responsible  
7 for ensuring the rules related to research are followed, may need to review records of study participants.  
8 As a result, they may see your name; but they will not to reveal your identity to others.  
9

10 When the results of the research are published or discussed in meetings, no information will be included  
11 that would reveal your identity. Any paperwork related to the study which contains information about you  
12 will be kept in a locked cabinet in a locked office. Only staff members of the study will have access to  
13 this information. A code will be assigned to each individual participating in the study. This code will be  
14 stored on a computer in a locked file. The key to unlock the information will only be known by the  
15 research staff. All data entered into a computer will be entered using this code so information will no  
16 longer have any information that can identify you such as your name. Forms containing any identifying  
17 information will be destroyed two years after the study is finished.  
18

19 • **Participation and Withdrawal**

20 Your participation in this research is VOLUNTARY. If you choose not to participate, that will not affect  
21 your relationship with the hospital, your health provider or health centre you usually get your medical  
22 care from, or your right to health care. If you decide to participate, you are free to withdraw your consent  
23 and stop your participation at any time and can still receive future health care at the hospital or health  
24 center you go to.  
25

26 • **Withdrawal of Participation by the Investigator**

27 The research investigator may stop your participation in this research if he or she feels this is best for you.  
28 The investigators will make the decision and let you know if it is not possible for you to continue. The  
29 decision may be made to protect your health and safety.  
30

31 • **Who can answer questions I might have about this study?**

32 In the event of a research related injury or if you experience a problem, please immediately return to the  
33 hospital or health centre you go to or contact Mike Nyirenda. The NHSRC Ministry of Health  
34 information (Dr. Kathyola) is also provided in case you have questions about your rights as a research  
35 participant.  
36

37 Investigator:

38 Khumbo Phiri  
39 Mobile: +265999840946  
40 Partners in Hope Clinic  
41 Area 36, Plot8  
42 M1 Road South  
43 Lilongwe, Malawi  
44

45 OR

46 Dr.C. Mitambo  
47 The Secretariate, NHSRC  
48 Ministry of Health  
49 P.O Box 30377  
50 Lilongwe 3  
51 Cell +265888344 443  
52  
53  
54  
55  
56  
57  
58  
59  
60

**SIGNATURE OF RESEARCH SUBJECT [OR LEGAL REPRESENTATIVE]**

I have read (or someone has read to me) the information provided above. I have been given an opportunity to ask questions and all of my questions have been answered to my satisfaction. I have been given a copy of this form.

**BY SIGNING THIS FORM, I WILLINGLY AGREE TO PARTICIPATE IN THE RESEARCH:**

\_\_\_\_\_  
Name of Subject

\_\_\_\_\_  
Name of Legal Representative (if applicable)

\_\_\_\_\_  
DATE (DAY/MO/YR): \_\_\_\_\_

\_\_\_\_\_  
Signature of Subject or Legal Representative  
(may place an X OR fingerprint if unable to sign)

**SIGNATURE OF INVESTIGATOR OR DESIGNEE**

I have explained the research to the subject or his/her legal representative and answered all of his/her questions. I believe that he/she understands the information described in this document and freely consents to participate.

\_\_\_\_\_  
Name of Investigator or Designee

\_\_\_\_\_  
Signature of Investigator or Designee      \_\_\_\_\_  
Date (must be the same as subject's)

---

**WRITTEN INFORMED CONSENT**  
**Identifying efficient linkage strategies for HIV self-testing (IDEaL)**  
 Male (Chichewa)

---

Mukufunsidwa kuti mutenge nawo mbali mu gawo lino la kafukufuku wotchedwa”kupeza njira zoyenera zobwezeletsa anthu pa thandizo la ma ARV” amene akupangidwa ndi bungwe la Partners In Hope-EQUIP polojekiti ndi sukulu ya ukachenjeda ya University of California Los Angeles yaku Amerika. Mukufunsidwa kuti mutenge nawo mbali mu gawo lakafukufukuyu chifukwa muli ndi kachirokomo ka HIV komanso mwalandila kachipangizo koziyezela wekha HIVi. Kutenga nawo mbali mukafukufuku ameneyi sikokakamiza. Tikuwerengerani uthenga omwe walembedwa pansipa, ndipo muli oloedwa kufunsa mafunso aliwonse pa zomwe simukumvetsetsa, musanapange chiganizo chotenga nawo mbali kapena ayi. Ine ngati othandizira mukafufuku ameneyu ndikuthandizani pa ndondomeko yotenga chilolezo.\*

**Chifukwa chiyani kafukufukuyu akuchitika?**

Kuziyeza wekha HIV ndi kofunika kwa anthu omwe akufuna kudziwa za momwe mthupi mwawo mulili ku mbali ya HIV koma sapita kuchipatala, kotelo, ndikovuta kwa anthu omwe apezeka ndi HIV kudzela chipangizo choziyezela wekha kuti apeze thandizo la zaumoyo. Akafukufuku akufuna apeze njira zabwino zomwe zingathe kuthandiza azibambo omwe apezeka ndi HIV kuti agwiritse ntchito thandizo lina lazaumoyo ngati angakonde kutero. Kafukufukuyu apeleka mwayi wa njira zosiyana siyana zothandizira HIV kuti aone zomwe zingagwire ntchito bwino kwa azibambo omwe amagwiritsa ntchito ka chida koziyezela wekha HIV.

**Chichitike ndi chani mukatenga nawo mbali mu kafukufukuyu?**

Pali ma gawo angapo omwe adzachitike mukafukuku, Ngati mungazipereke kutenga nawo mbali mu kafukufukuyu mudzatenga nawo mbali mu magawo otsatirawa:

- Akafukufuku adzakuyendera kawiri. Ulendo woyamba tidzapemphani kuti mutenge nawo mbali mu kafukufuku yemwe tidzakufunsi zokhuza inuyo, kuphatikizapo ngati muli pa banja, muli ndi abwenzi ogonana nawo angati, maphunziro anu komanso zomwe munakumana nazo polandira thandizo la HIV komanso momwe mumnvera kumbali ya thandizo la HIV angakhale kuyezedwa HIV. Tikufunsani mafunso lelo (Ngati lelo muli okonzeka kuyankha mafunso) komanso miyezi inayi ikudzayi kuti tiwone ngati pali chomwe chasintha, kucheza kuli konse kuzitenga nthawi yosachepela makumi anayi ndi isanu. Muli oloedwa kukana kutenga nawo mbali mu kucheza kotsatira nthawi iliyonse.
2. Pamapepo pa kucheza koyamba mudzayikidwa mu imodzi mwa njira zitatu popanda ndondomeko iliyonse, pa nthawi yomwe mudzakhale mukuyikidwa mu njirayi mudzakhala muli pomwepo kuti muone njira yomwe mwapatsidwa. Potengera njira yomwe mwayikidwa mudzapatsidwanso mwayi wa mathandizo a zaumoyo angapo ochoka kwa opeleka thandizo la zaumoyo pa chiptala, zina mwa njira ndi:

- a) Chikumbutso cha ubwino wa thandizo la zaumoyo

- 1  
2  
3 b) Kucheza kwa chilimbitso komwe mungathe ndi mwayi ocheza ndi anthu ena ndi  
4 kuwafotokozela za umoyo wanu, zofuta zomwe mumakumana nazo komanso njira zomwe  
5 mumagwiritsa ntchito kuti moyo wanu ukhale wosavuta.  
6  
7 c) Thandizo la zaumoyo lomwe mumatha kulandira pakhomo monga thandizo la HIV  
8 komanso NCD lomwe mumalandila kamodzi. Pakatha masaba anayi mudzayendeledwa ndi  
9 wa zaumoyo yemwe adzakupelekezeni ku chipatala komwe mukapitilize kulandira  
10 thandizo ngati mwakonda kutelo.

11 Posatengera njira yomwe mwapatsidwa mongathe kukana kulandira thandizo la zaumoyo koma  
12 ndikupitiliza kutenga nawo mbali mu kafukufuku ndipo tingathe kupitilizabe kucheza komwe  
13 tatchula m'mwambamu.

- 14  
15 3. Miyezi isanu ndi umodzi yoyambilira ya kafukufuku tidzaona zambiri ya umoyo wanu ku chipatala cha  
16 m'dela lanu ngati munapitako mutalowa kale mu kafukufuku, zimenezi sizidzafuika kulankhula  
17 nanu ndipo zidzachitika mwachinsinsi.  
18 4. Pamapeto tidzakuyendelani pakutha kwa miyezi isanu ndi umodzi ya kafukufuku kuti tidzacheze nanu  
19 komanso kuti tidzanve za momwe mukunvera za kafukufuku, maganizo anu okhudza njira zina za  
20 mtsogolo komanso, thandizo lina lowonjezera ngati ilipo. Si onse otenga nawo mbali omwe  
21 adzaonedwe ndipo muli oloedwa kukana kutenga nawo mbali mukucheza ndipo kukana kwanu  
22 sikudzaononga mwayi wanu otenga nawo mbali mu study.  
23

#### 24 **Mutenga nthawi yaitali bwanji muli mukafukufuku?**

25 Zochitika zonse zakafukufuku zizamalizidwa pa miyezi isanu ndi umodzi (6) kuchokera lero.  
26  
27  
28

#### 29 **Pali zinthu zosowetsa mtendere kapena zodetsa nkhwawa zomwe mungayembekezere kuchokera mu** 30 **kafukufukuyu?**

31 Muzafunsidwa mndandanda wa mafunso ndi othandizira mukafukufuku ameneyi zokhuza mbiri yanu  
32 pankhani zogonana ndi zochitika mutalandira ka chida koziyeza wekha kuchokera kwa bwezi wanu  
33 ogonana naye komanso mmene munagwiritsira ntchito. Mutha kukhala osamasuka poyankha mafunso ena  
34 omwe wofunsa mafunso angafunse. Mutha kunena kuti “sindikufuna kuyankha” kufunso lilironse lomwe  
35 simukumasuka nalo. Mafunso onse azafunsidwa pa malo achinsinsi pomwe odwala anzanu kapena  
36 ogwira ntchito pachipatala sadzamva nawo mayankho anu.  
37  
38

39 Ngati mudzavomere kutenga nawo mbali mu imodzi mwa njira, a zaumoyo adzakufunsani kuti akupezeni  
40 kunyumba kwanu kapena mu dela lanu. Monga mwa thandizo lililonse la zaumoyo, ngati mungavomere  
41 kuyamba kumwa mankhwala a ma ARV mungathe kukhala pa chiospyezo choulula za momwe mulili  
42 m'mthupi mwano mosafuna.

43 Ngati mungakumane ndi masautso aliwonse, tidzakupatsani uphungu kapena kukutumizani koti  
44 mukathandizidwe ndi uphungu.  
45  
46  
47

#### 48 **Pali cholowa chilichonse potenga nawo mbali mukafukufukuyu?**

49 Mudzakhala ndi mwayi okambilana ndikunva zambiri zokhudza moyo wanu komanso thandizo la HIV  
50 ndi othandiza kafukufuku komanso dotolo munjira yachinsisi. Mudzakhalanso ndi mwayi oyamba  
51 mankhwala a ma ARV ku chipatala cha kufuna kwanu.  
52  
53

#### 54 **Pali cholowa chilichonse kwa anthu a mudera?**

1  
2  
3 Uthenga womwe udzatengedwe ngati mbali imodzi yakafukufukuyu uzakhala othandiza mu  
4 mapologalamu a dziko la Malawi, kapena ma pologalamu ena ofananirapo a kum'mwera kwa Africa,  
5 chifukwa choti ntchito imeneyi ikufuna kuona ngati pali njira yabwino yopeleka thandizo la HIV mwa  
6 azibambo, ma pologalamu aku Malawi azapita patsogolo ndikulimbikitsa njira zopititsira patsogolo.  
7

### 8 9 **Kodi mulandira malipiro potenga nawo mbali mukafukufukuyu?**

10  
11 Kutenga nawo mbali kosakakamiza. Mudzalandira chiongola dzanja cha ndalama zokwana  
12 7,500(Pafupifupi MK 15,000/20USD). Mudzalandila ndalamazi olo mutakhala kuti simunatenge nawo  
13 kapena mwatenga nawo mbali mu thandizo la HIV. Kwa omwe adzamalize nawo kucheza kowonjezera  
14 patatha miyezi isanu ndi umodzi adzalandira ndalama yowonjezera yokwana MK 7,500 (yokwana pafupi  
15 fupi 10 USD0 chifukwa cha nthawi yawo.  
16  
17

### 18 **Kodi pali kulipira kulikonse chifukwa chotenga nawo mbali mukafukufukuyu?**

19  
20 Kutenga nawo mbali mukafukufukuyu ndi kwaulere.  
21  
22

### 23 **Kodi uthenga wanga uzasungidwa mwa chinsinsi?**

24  
25 Anthu ogwira nawo ntchito mu kafukufuku okhawo ndi amene adziwe za uthenga wanu kapena  
26 chilichonse chomwe mutiuze pa kafukufukuyu.

27  
28 Anthu ovomerezeka oyimirira bungwe la National Health Sciences Research Council ndi UCLA office  
29 for Protection Of Research Subjects ndi amene ali ndi udindo woonetsetsa kuti malamulo a kafukufuku  
30 akutsatidwa, akhoza kufuna kuona nawo kaundula wa anthu amene akutenga nawo mbali  
31 mukafukufukuyu. Kutanthauza kuti akhonza kuzaona dzina lanu; koma sangaulure zokhuza inu kwa  
32 anthu ena.

33  
34 Pa nthawi imene zotsatira za kafukufukuyu zidzatsindikidwa kapena kukambidwa mu misonkhano, palibe  
35 uthenga womwe udzayikidwe wokuzindikiritsani. Uthenga uliwonse wolembedwa pa pepala wokhunza  
36 inu uzasungidwa mu kabati yokhoma mu ofesi yokhomanso. Anthu ogwira nawo ntchito  
37 mukafukufukuyu okhawo ndi amene azathe kuona uthenga umenewu. Njira yotanthauzira uthenga  
38 umenewu izadziwika ndi anthu akafukufukuyu basi. Uthenga onse olowetsedwa pa makina a kompyuta  
39 uzalowetsedwa kugwiritsa ntchito nambala, ndekuti uthenga onse sudzakhanso ndi zokuzindikiritsani  
40 monga dzina lanu. Ma pepala amene pali uthenga okuzindikitsani adzawonongedwa pakapita zaka ziwiri  
41 chimalizireni kafukufukuyu.

42  
43 Kutenga nawo mbali mu kafukufukuyu SIKOKAKAMIZA. Ngati musankhe kuti simutenga nawo mbali,  
44 izi sizingasokoneze ubale wanu ndi chipatala chino, anthu ogwira ntchito kuchipatala, kapena chipatala  
45 chomwe mumalandilirako chithandizo, kapena ufulu wanu wolandira thandizo la chipatala. Ngati  
46 mwapanga chisankho chotenga nawo mbali, mukhoza kuchosa chilolezo chanu ndikusiya kutenga nawo  
47 mbali nthawi ina iliyonse ndipo mungathe kuzalandirabe chithandizo pa chipatala pano mtsogolo.  
48

### 49 **Kusiysidwa kutenga nawo mbali mu kafukufuku ndi wakafukufuku**

50  
51 Anthu opangitsa kafukufukuyu akhonza kukuletsani kutenga nawo mbali mukafukufukuyu akaona kuti  
52 ndi bwino kuti mutero. Anthu akafukufukuwa azapanga chiganizochi ndikukudziwitsani kuti sizitheka  
53 kuti mupitirize. Chiganizochi chitha kupangidwa kuti ateteze thanzi ndi chitetezo chanu.  
54  
55  
56  
57  
58  
59  
60

**Kusiyitsidwa kutenga nawo mbali mu kafukufuku ndi wakafukufuku**

Anthu opangitsa kafukufukuyu akhonza kukuletsani kutenga nawo mbali mukafukufukuyu akaona kuti ndi bwino kuti mutero. Anthu akafukufukuwa azapanga chiganizochi ndikukudziwitsani kuti sizitheka kuti mupitirize. Chiganizochi chitha kupangidwa kuti ateteze thanzi ndi chitetezo chanu.

Investigator:

Khumbo Phiri  
Mobile: +265999840946  
Partners in Hope Clinic  
Area 36, Plot8  
M1 Road South  
Lilongwe, Malawi

OR

Dr.C. Mitambo  
The Secretariate, NHSRC  
Ministry of Health  
P.O Box 30377  
Lilongwe 3  
Cell +265888344 443

Wotenga mbali kapena omuyimira asayine

*Ndawerenga (kapena munthu wina wandiwerengera) zonse zalembedwa mwambamu. Ndapatsidwa mwayi wofunsa mafunso ndi mafunso onse ndinafunsa ayankhidwa ndipo ndakhutitsidwa. Ndapatsidwa pepala lina langati lomweyi.*

\_\_\_\_\_

Dzina la otenga mbali

\_\_\_\_\_

Dzina la oyimola malamulo

\_\_\_\_\_ Tsiku: \_\_\_\_\_

**Wotenga mbali kapena oyimira malamulo asayine**

**(Mutha kuyika X ngati simungathe kusayinila)**

**Ofufuza asayinire/Kapena othandizila Kafukufuku**

Ndafotokoza za kafukufuku uyu kwa otenga nawo mbali kapena owayimila, ndayankhanso mafunso awo onse. Ndikukhulupilira kuti amvetsetsa zomwe zananedwa mu chikalata ichi



1  
2  
3  
4  
5  
6  
7  
8  
9  
10  
11  
12  
13  
14  
15  
16  
17  
18  
19  
20  
21  
22  
23  
24  
25  
26  
27  
28  
29  
30  
31  
32  
33  
34  
35  
36  
37  
38  
39  
40  
41  
42  
43  
44  
45  
46  
47  
48  
49  
50  
51  
52  
53  
54  
55  
56  
57  
58  
59  
60

ndiponso avomereza mwakufuna kwawo kutenga nawo mbali.

\_\_\_\_\_

Dzina la ofufuza kapena othandizila kafukufuku

\_\_\_\_\_

Ofufuza kapena othandizila kafukufuku asayine apa      Tsiku

For peer review only

## 14.5. APPENDIX E: Baseline Survey – Male

### BASELINE SURVEY Identifying efficient linkage strategies for HIV self-testing (IDEaL) Male

| Question Name                  | Label                                                                                                                                                                                        | Responses                                                                                                                                                                                          |
|--------------------------------|----------------------------------------------------------------------------------------------------------------------------------------------------------------------------------------------|----------------------------------------------------------------------------------------------------------------------------------------------------------------------------------------------------|
| <b>INTRODUCTION SECTION</b>    |                                                                                                                                                                                              |                                                                                                                                                                                                    |
| interviewer                    | Full Name of Interviewer                                                                                                                                                                     |                                                                                                                                                                                                    |
| Interview date                 | Interview date                                                                                                                                                                               |                                                                                                                                                                                                    |
| Time start                     | Time survey started                                                                                                                                                                          |                                                                                                                                                                                                    |
| District                       | District                                                                                                                                                                                     |                                                                                                                                                                                                    |
| TA                             | TA                                                                                                                                                                                           |                                                                                                                                                                                                    |
| village                        | Village                                                                                                                                                                                      |                                                                                                                                                                                                    |
| <b>SECTION A: DEMOGRAPHICS</b> |                                                                                                                                                                                              |                                                                                                                                                                                                    |
| Intro Note                     | Thank you for agreeing to participate.<br>Now I will ask you a few questions about yourself and who you are.<br>Please feel free to answer honestly.<br>There are no right or wrong answers. |                                                                                                                                                                                                    |
| a7                             | What is your tribe?                                                                                                                                                                          | <ol style="list-style-type: none"> <li>1. Lomwe</li> <li>2. Sena</li> <li>3. Chewa</li> <li>4. Mang'anja/Nyanja</li> <li>5. Ngoni</li> <li>6. Tumbuka</li> <li>7. Tonga</li> <li>8. Yao</li> </ol> |

|      |                                                                                                 |                                                                                                                         |
|------|-------------------------------------------------------------------------------------------------|-------------------------------------------------------------------------------------------------------------------------|
|      |                                                                                                 | 99. Other, specify                                                                                                      |
| a3   | What is the highest level of school you attended?                                               | 1. Primary<br>2. Secondary<br>3. Higher                                                                                 |
| a3b  | What class did you complete in your highest level of school?                                    | _____                                                                                                                   |
| a4   | Please think of the past 12 months, how would you describe your primary occupation?             | 1. Working formally (employed full time)<br>2. Working informally (ganyu, farming, business)<br>3. Not working          |
| a5   | Are you currently married?                                                                      | 1. Married<br>2. Live-in partner<br>3. Steady Girlfriend/Boyfriend<br>4. Separated<br>5. Divorced<br>99. Other, specify |
| a6   | How many living children do you have?                                                           | _____                                                                                                                   |
| a6b  | What is the age of your <u>youngest</u> child?                                                  | _____                                                                                                                   |
| a6bc | What age is the child (in years or months)                                                      | _____                                                                                                                   |
| a4b  | How many children currently live with you?                                                      | _____                                                                                                                   |
| a7   | How many sexual partners have you had in the past 12 months?                                    | _____                                                                                                                   |
| a8   | Have you had sex with someone besides your wife/husband without a condom in the past 12 months? | 1. Yes<br>0. No<br>88. Don't know/ Not sure<br>89. Refused to answer                                                    |

|                                    |                                                                                                                                                                                                                             |                                                                                                                |
|------------------------------------|-----------------------------------------------------------------------------------------------------------------------------------------------------------------------------------------------------------------------------|----------------------------------------------------------------------------------------------------------------|
| a8b                                | Have you had sex without a condom in the past 12 months?                                                                                                                                                                    | 1. Yes<br>0. No<br>88. Don't know/ Not sure<br>89. Refused to answer                                           |
| <b>SECTION B: INCOME QUESTIONS</b> |                                                                                                                                                                                                                             |                                                                                                                |
| Intro Note                         | I will now discuss with you about the valuable items that you or your household possesses. As I will be chatting with you I will also some questions about money you have and activities that you indulge in to find money. |                                                                                                                |
| b1                                 | Please think of the past 12 months, how would you describe your primary occupation?                                                                                                                                         | 1. Working formally (employed full time)<br>2. Working informally (ganyu, farming, business)<br>3. Not working |
| b1b                                | Think about all the work you have done in the past month. How many days did you normally work this month that gave you pay?                                                                                                 | _____                                                                                                          |
| b2                                 | Do you have any savings for the future, such as a bank account, savings group or cash?                                                                                                                                      | 1. Yes<br>0. No                                                                                                |
| <b>Household Assets</b>            |                                                                                                                                                                                                                             |                                                                                                                |
| b3                                 | Does your household have:<br><i>The respondent said that his/her household doesn't have any of the household assets. Please probe and ensure that this is correct before you proceed.</i>                                   |                                                                                                                |
| b3_1                               | Metal Roof?                                                                                                                                                                                                                 | 1. Yes<br>0. No                                                                                                |
| b3_2                               | Electricity?                                                                                                                                                                                                                | 1. Yes                                                                                                         |

|       |                              |                 |
|-------|------------------------------|-----------------|
|       |                              | 0. No           |
| b3_3  | Paraffin lamp with no glass? | 1. Yes<br>0. No |
| b3_4  | A paraffin lamp?             | 1. Yes<br>0. No |
| b3_5  | A radio?                     | 1. Yes<br>0. No |
| b3_6  | A television?                | 1. Yes<br>0. No |
| b3_7  | A cellular phone?            | 1. Yes<br>0. No |
| b3_8  | A bed?                       | 1. Yes<br>0. No |
| b3_9  | A sofa set?                  | 1. Yes<br>0. No |
| b3_10 | A table?                     | 1. Yes<br>0. No |
| b3_11 | A refrigerator               | 1. Yes<br>0. No |
| b3_12 | Mattress?                    | 1. Yes<br>0. No |
| b3_13 | Chair(s)?                    | 1. Yes<br>0. No |
| b3_14 | Cattle?                      | 1. Yes<br>0. No |
| b3_15 | Goat?                        | 1. Yes<br>0. No |
| b3_16 | Sheep?                       | 1. Yes<br>0. No |
| b3_17 | Pigs?                        | 1. Yes<br>0. No |

|                     |                                                                                   |                                                                                                                                                                 |
|---------------------|-----------------------------------------------------------------------------------|-----------------------------------------------------------------------------------------------------------------------------------------------------------------|
| b3_18               | Donkey?                                                                           | 1. Yes<br>0. No                                                                                                                                                 |
| b3_19               | Chickens?                                                                         | 1. Yes<br>0. No                                                                                                                                                 |
| b3_20               | Other poultry?                                                                    | 1. Yes<br>0. No                                                                                                                                                 |
| b4                  | In the past 30 days, have you drank beer?                                         | 1. Yes<br>0. No                                                                                                                                                 |
| b4b                 | How many days in the past 30 days have you drank beer?                            | _____                                                                                                                                                           |
| b4c                 | How much money did you spend on beer the last time you went?                      | MWK:                                                                                                                                                            |
| b4d                 | In total, approximately how much money did you spend on beer in the past 30 days? | MWK:                                                                                                                                                            |
| <b>Relationship</b> |                                                                                   |                                                                                                                                                                 |
| Intro Note          | Now I'd like to talk to you about your current sexual relationship                |                                                                                                                                                                 |
| f8                  | How long have you been/were you in a sexual relationship with your partner?       | Days _____<br>Months _____<br>Years _____                                                                                                                       |
| f9                  | Do you have children with your partner? How many children?                        | _____                                                                                                                                                           |
| f10                 | How often do you currently talk to your partner?                                  | 1. Everyday<br>2. A couple times a week<br>3. Once a week<br>4. A couple times a month<br>5. Once a month<br>6. Less than once a month<br>7. Not at all (never) |
| f10b                | In a typical month, who earns more money? You, or your partner?                   | 1. Myself<br>2. This partner<br>3. We earn the same amount<br><br>88. Don't know                                                                                |

| Decision Making |                                                                                 |                                                                                                                                                                                    |
|-----------------|---------------------------------------------------------------------------------|------------------------------------------------------------------------------------------------------------------------------------------------------------------------------------|
| Intro Note      | Now I would like to talk to you about how you and your partner make decisions.  |                                                                                                                                                                                    |
| f11             | Who usually decides how the money you earn will be used?                        | 1. Yourself (Respondent)<br>2. Jointly (This partner and you together)<br>3. Mainly this partner<br>4. Someone else<br>5. Do not earn money<br>88. Refuse to say                   |
| f11b            | (if above question=4 ) Who decides?                                             | _____                                                                                                                                                                              |
| f12             | Who usually decides how your partner's earnings will be used?                   | 1. Yourself (Respondent)<br>2. Jointly (This partner and you together)<br>3. Mainly this partner<br>4. Someone else<br>5. Do not earn money<br>88. Refuse to say                   |
| f12b            | (if above question=4 ) Who decides?                                             | _____                                                                                                                                                                              |
| f13             | Who usually makes decisions about health care for yourself?                     | 1. Yourself (Respondent)<br>2. Jointly (This partner and you together)<br>3. Mainly this partner<br>4. Someone else<br>5. Not applicable/ Don't have children<br>88. Refuse to say |
| f13b            | (if above question=4 ) Who decides?                                             | _____                                                                                                                                                                              |
| f14             | Who usually makes decisions about health care for your child with this partner? | 1. Yourself (Respondent)<br>2. Jointly (This partner and you together)<br>3. Mainly this partner<br>4. Someone else                                                                |



|      |                                                                                                                                                                                                                                                                                                                                                                                                                                                                                                                                          |                                                                                                                                                                                                               |
|------|------------------------------------------------------------------------------------------------------------------------------------------------------------------------------------------------------------------------------------------------------------------------------------------------------------------------------------------------------------------------------------------------------------------------------------------------------------------------------------------------------------------------------------------|---------------------------------------------------------------------------------------------------------------------------------------------------------------------------------------------------------------|
|      |                                                                                                                                                                                                                                                                                                                                                                                                                                                                                                                                          | <p>5. Not applicable/ Don't have children</p> <p>88. Refuse to say</p>                                                                                                                                        |
| f14b | (if above question=4 ) Who decides?                                                                                                                                                                                                                                                                                                                                                                                                                                                                                                      | _____                                                                                                                                                                                                         |
| f15  | Who usually makes decisions about health care for your partner?                                                                                                                                                                                                                                                                                                                                                                                                                                                                          | <p>1. Yourself (Respondent)</p> <p>2. Jointly (This partner and you together)</p> <p>3. Mainly this partner</p> <p>4. Someone else</p> <p>5. Not applicable/ Don't have children</p> <p>88. Refuse to say</p> |
| f15b | (if above question=4 ) Who decides?                                                                                                                                                                                                                                                                                                                                                                                                                                                                                                      | _____                                                                                                                                                                                                         |
| f16  | Who usually makes decisions about making major household purchases?                                                                                                                                                                                                                                                                                                                                                                                                                                                                      | <p>1. Yourself (Respondent)</p> <p>2. Jointly (This partner and you together)</p> <p>3. Mainly this partner</p> <p>4. Someone else</p> <p>5. Not applicable/ Don't have children</p> <p>88. Refuse to say</p> |
| f16b | (if above question=4 ) Who decides?                                                                                                                                                                                                                                                                                                                                                                                                                                                                                                      | _____                                                                                                                                                                                                         |
| Note | <p>I would like to ask you questions about [probability/chance/likelihood] that certain things will happen. There are ten beans in this cup. I will ask you to pick some of the beans and put them in the plate. The number of beans that you are going to put in the plate will reflect the probability that something will happen. One bean means there is very little chance that something will happen. If you do not put any bean in the plate it means you are certain that there is no likelihood that something will happen.</p> |                                                                                                                                                                                                               |

|          |                                                                                                                                                                                                                                                                                                                                                                                                                                                                                                                                                                                                                                                                          |                            |
|----------|--------------------------------------------------------------------------------------------------------------------------------------------------------------------------------------------------------------------------------------------------------------------------------------------------------------------------------------------------------------------------------------------------------------------------------------------------------------------------------------------------------------------------------------------------------------------------------------------------------------------------------------------------------------------------|----------------------------|
| note2    | <p>If you put additional beans in the plate it means the chance that something will happen will also increase. For example, if you put one or two beans in the plate, it means there is little chance that something will happen. Even though there is little chance but it can happen. If you put ten beans it means there is equal chance of something happening or not. If you put six beans it means the chance that something will happen is slightly greater than not happening. If you put all ten beans, it means you are certain that whatever the case something will really happen. There is no wrong or right answer I just want to know what you think.</p> |                            |
| note3    | <p>INTERVIEWER: Report for each question the NUMBER OF BEANS put in the PLATE. After each question, replace the beans on the table (unless otherwise noted).</p>                                                                                                                                                                                                                                                                                                                                                                                                                                                                                                         |                            |
| Practice |                                                                                                                                                                                                                                                                                                                                                                                                                                                                                                                                                                                                                                                                          |                            |
| pr1      | <p>Pick the number of beans that reflects how likely you think it is that:</p>                                                                                                                                                                                                                                                                                                                                                                                                                                                                                                                                                                                           | _____                      |
| pr1b     | <p>You will go to the market at least once within the next 2 days.</p>                                                                                                                                                                                                                                                                                                                                                                                                                                                                                                                                                                                                   | _____                      |
| pr1c     | <p>You will go to the market at least once within the next 2 weeks.</p>                                                                                                                                                                                                                                                                                                                                                                                                                                                                                                                                                                                                  | _____                      |
| Practice |                                                                                                                                                                                                                                                                                                                                                                                                                                                                                                                                                                                                                                                                          |                            |
| pr2      | <p>INTERVIEWER: Did Respondent add any beans between pr1b and pr1c?</p>                                                                                                                                                                                                                                                                                                                                                                                                                                                                                                                                                                                                  | <p>1. Yes</p> <p>0. No</p> |

|                                           |                                                                                                                                                                                                                                                                                                                                                                                                                               |                                                                                                                                                                                      |
|-------------------------------------------|-------------------------------------------------------------------------------------------------------------------------------------------------------------------------------------------------------------------------------------------------------------------------------------------------------------------------------------------------------------------------------------------------------------------------------|--------------------------------------------------------------------------------------------------------------------------------------------------------------------------------------|
| pr3                                       | <p>Remember, as time goes by, you may find more time to go to the market. Therefore, you should have added beans to the plate. Let me ask you again. Now, add beans in the plate so that the number of beans in the plate reflects how likely you think it is that you will go to the market at least once within 2 weeks.</p> <p>How likely you think it is that you will go to the market at least once within 2 weeks?</p> | _____                                                                                                                                                                                |
| f17                                       | Pick the number of beans that reflects how likely you think:                                                                                                                                                                                                                                                                                                                                                                  |                                                                                                                                                                                      |
| f17b                                      | You will still be married/with [partner one year from now.                                                                                                                                                                                                                                                                                                                                                                    | _____                                                                                                                                                                                |
| f17c                                      | You are currently infected with HIV/AIDS                                                                                                                                                                                                                                                                                                                                                                                      | _____                                                                                                                                                                                |
| f17d                                      | You will become infected with HIV/AIDS during the next 12 months                                                                                                                                                                                                                                                                                                                                                              | _____                                                                                                                                                                                |
| f17e                                      | You will become infected with HIV/AIDS during their lifetime                                                                                                                                                                                                                                                                                                                                                                  | _____                                                                                                                                                                                |
| f17c                                      | partner is infected with HIV/AIDS now.                                                                                                                                                                                                                                                                                                                                                                                        | _____                                                                                                                                                                                |
| f17d                                      | partner will become infected with HIV/AIDS during the next 12 months.                                                                                                                                                                                                                                                                                                                                                         | _____                                                                                                                                                                                |
| <b>SELF REPORTED HEALTH AND HAPPINESS</b> |                                                                                                                                                                                                                                                                                                                                                                                                                               |                                                                                                                                                                                      |
| Intro Note                                | Now I'd like to talk to you about how healthy and happy you feel.                                                                                                                                                                                                                                                                                                                                                             |                                                                                                                                                                                      |
| e1                                        | I am interested in your general level of well-being or satisfaction with life. How satisfied are you with your life, all things considered?                                                                                                                                                                                                                                                                                   | <ol style="list-style-type: none"> <li>1. Very satisfied</li> <li>2. Somewhat satisfied</li> <li>3. Neutral</li> <li>4. Somewhat unsatisfied</li> <li>5. Very unsatisfied</li> </ol> |

|                                   |                                                                                                                       |                                                                                                                                          |
|-----------------------------------|-----------------------------------------------------------------------------------------------------------------------|------------------------------------------------------------------------------------------------------------------------------------------|
| e2                                | Do you think that you are more, equally or less satisfied than other persons your age and sex living in your village? | <ol style="list-style-type: none"> <li>1. More satisfied</li> <li>2. Equally satisfied</li> <li>3. Less satisfied</li> </ol>             |
| e3                                | In general, would you say your health now is: very good, good, poor or very poor?                                     | <ol style="list-style-type: none"> <li>1. Very good</li> <li>2. Good</li> <li>3. Poor</li> <li>4. Very poor</li> </ol>                   |
| e4                                | How would you compare your health to other people of the same age and sex in your village?                            | <ol style="list-style-type: none"> <li>1. More healthy</li> <li>2. Equally healthy</li> <li>3. Less healthy</li> </ol>                   |
| e5                                | In the past month, how many days were you too sick to work/go to school/complete household chores?                    | _____                                                                                                                                    |
| <b>Happiness</b>                  |                                                                                                                       |                                                                                                                                          |
| e6                                | How true are the following statements for you in the last month?                                                      |                                                                                                                                          |
| e6_1                              | I have felt depressed                                                                                                 | <ol style="list-style-type: none"> <li>1. Strongly Agree</li> <li>2. Agree</li> <li>3. Disagree</li> <li>4. Strongly Disagree</li> </ol> |
| e6_2                              | I have felt life was not worth living                                                                                 | <ol style="list-style-type: none"> <li>1. Strongly Agree</li> <li>2. Agree</li> <li>3. Disagree</li> <li>4. Strongly Disagree</li> </ol> |
| e6_3                              | I have felt content.                                                                                                  | <ol style="list-style-type: none"> <li>1. Strongly Agree</li> <li>2. Agree</li> <li>3. Disagree</li> <li>4. Strongly Disagree</li> </ol> |
| e6_4                              | I have felt lonely                                                                                                    | <ol style="list-style-type: none"> <li>1. Strongly Agree</li> <li>2. Agree</li> <li>3. Disagree</li> <li>4. Strongly Disagree</li> </ol> |
| <b>GENDER EQUITABLE MEN SCALE</b> |                                                                                                                       |                                                                                                                                          |
| Note                              | Please tell me if you strongly agree, agree, disagree, or strongly disagree with the following statements:            |                                                                                                                                          |

|    |                                                                                                            |                                                                                                                                                                                      |
|----|------------------------------------------------------------------------------------------------------------|--------------------------------------------------------------------------------------------------------------------------------------------------------------------------------------|
| j1 | Woman's most important role is to take care of her home and cook (take care of home is about housekeeping) | <ol style="list-style-type: none"> <li>1. Strongly Agree</li> <li>2. Agree</li> <li>3. Unsure</li> <li>4. Disagree</li> <li>5. Strongly Disagree</li> </ol> <p>88. Refuse to say</p> |
| j2 | Men need sex more than women                                                                               | <ol style="list-style-type: none"> <li>1. Strongly Agree</li> <li>2. Agree</li> <li>3. Unsure</li> <li>4. Disagree</li> <li>5. Strongly Disagree</li> </ol> <p>88. Refuse to say</p> |
| j3 | Men don't talk about sex, they just do it.                                                                 | <ol style="list-style-type: none"> <li>1. Strongly Agree</li> <li>2. Agree</li> <li>3. Unsure</li> <li>4. Disagree</li> <li>5. Strongly Disagree</li> </ol> <p>88. Refuse to say</p> |
| j4 | There are times when a woman deserves to be beaten                                                         | <ol style="list-style-type: none"> <li>1. Strongly Agree</li> <li>2. Agree</li> <li>3. Unsure</li> <li>4. Disagree</li> <li>5. Strongly Disagree</li> </ol> <p>88. Refuse to say</p> |
| j5 | Changing diapers, giving kids a bath & feeding kids are mother's responsibility                            | <ol style="list-style-type: none"> <li>1. Strongly Agree</li> <li>2. Agree</li> <li>3. Unsure</li> <li>4. Disagree</li> <li>5. Strongly Disagree</li> </ol> <p>88. Refuse to say</p> |
| j6 | It is a woman's responsibility to avoid getting pregnant                                                   | <ol style="list-style-type: none"> <li>1. Strongly Agree</li> <li>2. Agree</li> <li>3. Unsure</li> <li>4. Disagree</li> <li>5. Strongly Disagree</li> </ol> <p>88. Refuse to say</p> |
| j7 | A man should have the final word about decisions in his home                                               | <ol style="list-style-type: none"> <li>1. Strongly Agree</li> <li>2. Agree</li> <li>3. Unsure</li> <li>4. Disagree</li> </ol>                                                        |

|      |                                                                            |                                                                                                        |
|------|----------------------------------------------------------------------------|--------------------------------------------------------------------------------------------------------|
|      |                                                                            | 5. Strongly Disagree<br>88. Refuse to say                                                              |
| j8   | Men are always ready to have sex                                           | 1. Strongly Agree<br>2. Agree<br>3. Unsure<br>4. Disagree<br>5. Strongly Disagree<br>88. Refuse to say |
| j9   | A woman should tolerate violence in order to keep her family together      | 1. Strongly Agree<br>2. Agree<br>3. Unsure<br>4. Disagree<br>5. Strongly Disagree<br>88. Refuse to say |
| j10a | I would be outraged if my wife asked me to use a condom.                   | 1. Strongly Agree<br>2. Agree<br>3. Unsure<br>4. Disagree<br>5. Strongly Disagree<br>88. Refuse to say |
| j10b | Men would be outraged if their wife asked them to use a condom             | 1. Strongly Agree<br>2. Agree<br>3. Unsure<br>4. Disagree<br>5. Strongly Disagree<br>88. Refuse to say |
| j11  | A man and a woman should decide together what type of contraceptive to use | 1. Strongly Agree<br>2. Agree<br>3. Unsure<br>4. Disagree<br>5. Strongly Disagree<br>88. Refuse to say |
| j12  | I would never have a homosexual friend                                     | 1. Strongly Agree<br>2. Agree<br>3. Unsure<br>4. Disagree<br>5. Strongly Disagree<br>88. Refuse to say |

|      |                                                                                       |                                                                                                                                                                                      |
|------|---------------------------------------------------------------------------------------|--------------------------------------------------------------------------------------------------------------------------------------------------------------------------------------|
| j13a | If someone insults me, I will defend my reputation, with force if I have to.          | <ol style="list-style-type: none"> <li>1. Strongly Agree</li> <li>2. Agree</li> <li>3. Unsure</li> <li>4. Disagree</li> <li>5. Strongly Disagree</li> </ol> <p>88. Refuse to say</p> |
| j13b | If someone insults a man, he should defend his reputation, with force if he has to    | <ol style="list-style-type: none"> <li>1. Strongly Agree</li> <li>2. Agree</li> <li>3. Unsure</li> <li>4. Disagree</li> <li>5. Strongly Disagree</li> </ol> <p>88. Refuse to say</p> |
| j14  | To be a man you need to be tough.                                                     | <ol style="list-style-type: none"> <li>1. Strongly Agree</li> <li>2. Agree</li> <li>3. Unsure</li> <li>4. Disagree</li> <li>5. Strongly Disagree</li> </ol> <p>88. Refuse to say</p> |
| j15  | Men should be embarrassed if unable to get an erection                                | <ol style="list-style-type: none"> <li>1. Strongly Agree</li> <li>2. Agree</li> <li>3. Unsure</li> <li>4. Disagree</li> <li>5. Strongly Disagree</li> </ol> <p>88. Refuse to say</p> |
| j16  | If a guy gets a woman pregnant, child is the responsibility of both the man and woman | <ol style="list-style-type: none"> <li>1. Strongly Agree</li> <li>2. Agree</li> <li>3. Unsure</li> <li>4. Disagree</li> <li>5. Strongly Disagree</li> </ol> <p>88. Refuse to say</p> |
| j17  | A man should know what his partner likes during sex                                   | <ol style="list-style-type: none"> <li>1. Strongly Agree</li> <li>2. Agree</li> <li>3. Unsure</li> <li>4. Disagree</li> <li>5. Strongly Disagree</li> </ol> <p>88. Refuse to say</p> |
| j18  | The participation of the father is important in raising children                      | <ol style="list-style-type: none"> <li>1. Strongly Agree</li> <li>2. Agree</li> <li>3. Unsure</li> <li>4. Disagree</li> </ol>                                                        |



|                     |                                                                                                                                                                                                                  |                                                                                                        |
|---------------------|------------------------------------------------------------------------------------------------------------------------------------------------------------------------------------------------------------------|--------------------------------------------------------------------------------------------------------|
|                     |                                                                                                                                                                                                                  | 5. Strongly Disagree<br>88. Refuse to say                                                              |
| j19                 | It's important for men to have friends to talk about their problems                                                                                                                                              | 1. Strongly Agree<br>2. Agree<br>3. Unsure<br>4. Disagree<br>5. Strongly Disagree<br>88. Refuse to say |
| j20                 | A couple should decide together if they want to have children.                                                                                                                                                   | 1. Strongly Agree<br>2. Agree<br>3. Unsure<br>4. Disagree<br>5. Strongly Disagree<br>88. Refuse to say |
| <b>STIGMA</b>       |                                                                                                                                                                                                                  |                                                                                                        |
| Note                | In this next section I'd like to discuss your thoughts about people living with HIV in your community. Please feel free to talk openly, there is no right or wrong answer. I am interested in your own thoughts. |                                                                                                        |
| i3                  | I would buy fresh vegetables from a shopkeeper or vendor if I knew that this person had HIV                                                                                                                      | 1. Strongly Agree<br>2. Agree<br>3. Neutral<br>4. Disagree<br>5. Strongly Disagree                     |
| i4                  | If a member of my family became sick with AIDS, I would be willing to care for her or him in our own household                                                                                                   | 1. Strongly Agree<br>2. Agree<br>3. Neutral<br>4. Disagree<br>5. Strongly Disagree                     |
| i5                  | In my opinion, if a female teacher has HIV but is not sick, she should be allowed to continue teaching in the school                                                                                             | 1. Strongly Agree<br>2. Agree<br>3. Neutral<br>4. Disagree<br>5. Strongly Disagree                     |
| <b>EXPECTATIONS</b> |                                                                                                                                                                                                                  |                                                                                                        |

|            |                                                                                                                                                                                                                                                                                                                                                                                                                                                                                                                                    |       |
|------------|------------------------------------------------------------------------------------------------------------------------------------------------------------------------------------------------------------------------------------------------------------------------------------------------------------------------------------------------------------------------------------------------------------------------------------------------------------------------------------------------------------------------------------|-------|
| Intro Note | I would like to ask you questions about [probability/chance/likelihood] that certain things will happen. There are ten beans in this cup. I will ask you to pick some of the beans and put them in the plate. The number of beans that you are going to put in the place will reflect the probability that something will happen. One beans means there is very little chance that something will happen. If you do not put any bean in the plate it means you are certain that there is no likelihood that something will happen. |       |
| h4         | Pick the number of beans that reflects how likely you think it is that:                                                                                                                                                                                                                                                                                                                                                                                                                                                            | _____ |
| h4b        | You will have to rely on family members for financial assistance in the next 12 months.                                                                                                                                                                                                                                                                                                                                                                                                                                            | _____ |
| h4c        | You will have to provide some family members with financial assistance in the next 12 months.                                                                                                                                                                                                                                                                                                                                                                                                                                      | _____ |
| Note       | Next, I would like to ask you a few questions about what you expect in the future. I know that nobody knows for sure what the future may bring, but let's just talk about your best guess.                                                                                                                                                                                                                                                                                                                                         |       |
| h5         | In the next year how likely is it that you will:                                                                                                                                                                                                                                                                                                                                                                                                                                                                                   |       |
| h5a        | You will be enrolled in school one year from now                                                                                                                                                                                                                                                                                                                                                                                                                                                                                   | _____ |
| h5b        | Start a new business?                                                                                                                                                                                                                                                                                                                                                                                                                                                                                                              | _____ |
| h5c        | Open a bank account?                                                                                                                                                                                                                                                                                                                                                                                                                                                                                                               | _____ |
| h5d        | Buy land?                                                                                                                                                                                                                                                                                                                                                                                                                                                                                                                          | _____ |

|                     |                                                                                                                                                                               |                                                                                        |
|---------------------|-------------------------------------------------------------------------------------------------------------------------------------------------------------------------------|----------------------------------------------------------------------------------------|
| h5e                 | Save money?                                                                                                                                                                   | _____                                                                                  |
| h5f                 | Experience shortage of food?                                                                                                                                                  | _____                                                                                  |
| h5g                 | Have steady work?                                                                                                                                                             | _____                                                                                  |
| Tested for HIV      |                                                                                                                                                                               |                                                                                        |
| pd2                 | Approximately how many times have you ever been tested for HIV?<br><i>Enter "-99" if client doesn't remember</i>                                                              | _____                                                                                  |
| pd3                 | When was the last time you were tested for HIV?                                                                                                                               | a. Year _____<br>b. Month _____                                                        |
| pd5                 | Think about the very first time you received an HIV+ test result. Since that very first HIV+ test result, have you ever tested for HIV again (excluding a confirmatory test)? | 1. Yes<br>0. No                                                                        |
| pd6                 | Have you ever initiated ART?                                                                                                                                                  | 1. Yes<br>0. No                                                                        |
| First Initiated ART |                                                                                                                                                                               |                                                                                        |
| pd6b                | When did you first initiate ART?                                                                                                                                              | a. Year _____<br>b. Month _____                                                        |
| pd7                 | Have you ever been >14 days late for an ART appointment?                                                                                                                      | 1. Yes<br>0. No                                                                        |
| pd7b                | How many times?                                                                                                                                                               | _____                                                                                  |
| pd8                 | Do you know anyone who is on ART?                                                                                                                                             | 1. Yes<br>0. No                                                                        |
| pd8b                | Now think about the person on ART who you are closest with.<br><br>How often do you talk with them                                                                            | 1. Everyday<br>2. A couple times a week<br>3. Once a week<br>4. A couple times a month |

|       |                                                                        |                                                                                                                                                                                                                                                                                                                                                    |
|-------|------------------------------------------------------------------------|----------------------------------------------------------------------------------------------------------------------------------------------------------------------------------------------------------------------------------------------------------------------------------------------------------------------------------------------------|
|       | about ART?                                                             | <ol style="list-style-type: none"> <li>5. Once a month</li> <li>6. Less than once a month</li> <li>7. Not at all (never)</li> </ol>                                                                                                                                                                                                                |
| pd9   | Have you disclosed your HIV status to anyone besides your partner?     | <ol style="list-style-type: none"> <li>1. Yes</li> <li>0. No</li> </ol>                                                                                                                                                                                                                                                                            |
| pd9b  | <p>Who else did you disclose to?</p> <p><i>Mark all that apply</i></p> | <ol style="list-style-type: none"> <li>1. Sister</li> <li>2. Brother</li> <li>3. Father</li> <li>4. Mother</li> <li>5. Uncle</li> <li>6. Aunt</li> <li>7. Friend</li> <li>8. Mother-in-Law</li> <li>9. Father-in-Law</li> <li>10. My children</li> <li>11. Employee</li> <li>12. Other sexual partner</li> <li>99. Other, specify _____</li> </ol> |
| pd10  | Of those people you disclosed to, who do you talk to most often?       | <ol style="list-style-type: none"> <li>1. Sister</li> <li>2. Brother</li> <li>3. Father</li> <li>4. Mother</li> <li>5. Uncle</li> <li>6. Aunt</li> <li>7. Friend</li> <li>8. Mother-in-Law</li> <li>9. Father-in-Law</li> <li>10. My children</li> <li>11. Employee</li> <li>12. Other sexual Partner</li> <li>99. Other, specify _____</li> </ol> |
| pd10c | How often do you talk to that person?                                  | <ol style="list-style-type: none"> <li>1. Everyday</li> <li>2. A couple times a week</li> <li>3. Once a week</li> <li>4. A couple times a month</li> <li>5. Once a month</li> <li>6. Less than once a month</li> <li>7. Not at all (never)</li> </ol>                                                                                              |

| PREVIOUS USE OF HEALTH SERVICES |                                                                                                                                                                                               |                                                                                                                                                                                                        |
|---------------------------------|-----------------------------------------------------------------------------------------------------------------------------------------------------------------------------------------------|--------------------------------------------------------------------------------------------------------------------------------------------------------------------------------------------------------|
| Intro Note                      | Now I'd like to talk to you about your experience with using health services at health facilities.                                                                                            |                                                                                                                                                                                                        |
| h1                              | Have you gone to a health facility in the past 12 months (either for yourself or someone else - AKA as a guardian)?                                                                           | 1. Yes<br>0. No                                                                                                                                                                                        |
| h2                              | How many times have you gone to the health facility in the past 12 months?                                                                                                                    | _____                                                                                                                                                                                                  |
| h3                              | Now think about yourself specifically. How many times have you gone to a health facility in the past 12 months for your own health care?                                                      | _____                                                                                                                                                                                                  |
| h_a1                            | When was the last time (the YEAR) you went to a health facility for YOUR OWN health?<br><br>NOTE: PUT WHAT YEAR. (i.e., 2015). If DO NOT REMEMBER, help them estimate. IF NEVER GONE, put -99 | _____                                                                                                                                                                                                  |
| h4                              | What services did you receive at your <u>last</u> health facility visit for your own health?                                                                                                  | 1. ANC<br>2. Family Planning<br>3. Delivery<br>4. Post-natal<br>5. Under Five<br>6. HTC<br>7. ART<br>8. Feeling sick (OPD)<br>9. Injury (OPD)<br>10. Dentist<br>11. None<br><br>99. Other specify_____ |
| h_a2                            | Now think about the SECOND most recent time you went to a health facility for YOUR OWN health. What year did you go to the health facility?                                                   | _____                                                                                                                                                                                                  |
| c3                              | Now please think about your MOST RECENT visit to a health facility, excluding today. When did you go?                                                                                         | a. Year _____<br>b. Month _____                                                                                                                                                                        |

|     |                                                                |                                                                                                                                                                                                     |
|-----|----------------------------------------------------------------|-----------------------------------------------------------------------------------------------------------------------------------------------------------------------------------------------------|
| c4  | Which facility did you go to?                                  | 1. Current facility<br>0. Other facility, specify _____                                                                                                                                             |
| c5  | What was the main service you went for?                        | 1. ANC<br>2. Family Planning<br>3. Delivery<br>4. Post-natal<br>5. Under Five<br>6. HTC<br>7. ART<br>8. Feeling sick (OPD)<br>9. Injury (OPD)<br>10. Dentist<br>11. None<br>99. Other specify _____ |
| c5b | Who received services?                                         | 1. Myself<br>2. My child<br>3. My partner<br>4. Another family member<br>5. A friend<br>99. Other, specify _____                                                                                    |
| c6a | Did you (or the person you came with) receive another service? | 1. Yes<br>0. No                                                                                                                                                                                     |
| c6  | What was the second service you went for?                      | 1. ANC<br>2. Family Planning<br>3. Delivery<br>4. Post-natal<br>5. Under Five<br>6. HTC<br>7. ART<br>8. Feeling sick (OPD)<br>9. Injury (OPD)<br>10. Dentist<br>11. None<br>99. Other specify _____ |
| c6b | Who received services?                                         | 1. Myself<br>2. My child<br>3. My partner<br>4. Another family member<br>5. A friend<br>99. Other, specify _____                                                                                    |

| Service Satisfaction |                                                                                                                                                                                                                                                                   |                                                                                   |
|----------------------|-------------------------------------------------------------------------------------------------------------------------------------------------------------------------------------------------------------------------------------------------------------------|-----------------------------------------------------------------------------------|
| c10                  | Now I would like to talk to you about your satisfaction with the services you received that day. Please tell me whether any of these were problems for you at the VISIT YOU ARE THINKING ABOUT NOW, and if so, whether they were major or minor problems for you. |                                                                                   |
| c10_1                | Time you waited to see a provider                                                                                                                                                                                                                                 | 1. Major<br>2. Minor<br><br>0. No-problem<br>88. Not applicable<br>89. Don't know |
| c10_2                | Ability to discuss problems or concerns about your pregnancy                                                                                                                                                                                                      | 1. Major<br>2. Minor<br><br>0. No-problem<br>88. Not applicable<br>89. Don't know |
| c10_3                | Amount of explanation you received about the problem or treatment                                                                                                                                                                                                 | 1. Major<br>2. Minor<br><br>0. No-problem<br>88. Not applicable<br>89. Don't know |
| c10_4                | Privacy from having others see the examination                                                                                                                                                                                                                    | 1. Major<br>2. Minor<br><br>0. No-problem<br>88. Not applicable<br>89. Don't know |
| c10_5                | Privacy from having others hear your consultation discussion                                                                                                                                                                                                      | 1. Major<br>2. Minor<br><br>0. No-problem<br>88. Not applicable<br>89. Don't know |
| c10_6                | Availability of medicines at this facility                                                                                                                                                                                                                        | 1. Major<br>2. Minor                                                              |



|              |                                                                                                                                                |                                                                                                                                                                                                                           |
|--------------|------------------------------------------------------------------------------------------------------------------------------------------------|---------------------------------------------------------------------------------------------------------------------------------------------------------------------------------------------------------------------------|
|              |                                                                                                                                                | <ul style="list-style-type: none"> <li>0. No-problem</li> <li>88. Not applicable</li> <li>89. Don't know</li> </ul>                                                                                                       |
| c10_7        | The hours of service at this facility, i.e., when they open and close                                                                          | <ul style="list-style-type: none"> <li>1. Major</li> <li>2. Minor</li> <li>0. No-problem</li> <li>88. Not applicable</li> <li>89. Don't know</li> </ul>                                                                   |
| c10_8        | The number of days services are available to you                                                                                               | <ul style="list-style-type: none"> <li>1. Major</li> <li>2. Minor</li> <li>0. No-problem</li> <li>88. Not applicable</li> <li>89. Don't know</li> </ul>                                                                   |
| c10_9        | The cleanliness of the facility                                                                                                                | <ul style="list-style-type: none"> <li>1. Major</li> <li>2. Minor</li> <li>0. No-problem</li> <li>88. Not applicable</li> <li>89. Don't know</li> </ul>                                                                   |
| c10_10       | How the staff treated you                                                                                                                      | <ul style="list-style-type: none"> <li>1. Major</li> <li>2. Minor</li> <li>0. No-problem</li> <li>88. Not applicable</li> <li>89. Don't know</li> </ul>                                                                   |
| c10_11       | Cost for services or treatments                                                                                                                | <ul style="list-style-type: none"> <li>1. Major</li> <li>2. Minor</li> <li>0. No-problem</li> <li>88. Not applicable</li> <li>89. Don't know</li> </ul>                                                                   |
| Satisfaction |                                                                                                                                                |                                                                                                                                                                                                                           |
| c11          | In general, which of the following statements best describes your opinion of the services you either received or were provided at the facility | <ul style="list-style-type: none"> <li>1. I am very satisfied with the services I received</li> <li>2. I am satisfied with the services I received</li> <li>3. I am not satisfied with the services I received</li> </ul> |

|                    |                                                                                                                         |                                                        |
|--------------------|-------------------------------------------------------------------------------------------------------------------------|--------------------------------------------------------|
|                    |                                                                                                                         | 4. I am very dissatisfied with the services I received |
| c12                | Did you recommend this health facility to a friend or family member?                                                    | 1. Yes<br>0. No                                        |
| Comment            | We have reached the end of the chat. Thank you for your time. Do you have anything else you would like to say?          |                                                        |
| End Note           | Thank the participant for their time and give them transport reimbursement, if they did not come for an ART appointment |                                                        |
| Comments           | Enumerator comments                                                                                                     |                                                        |
| End of the survey! |                                                                                                                         |                                                        |

**BASELINE SURVEY**  
**Identifying efficient linkage strategies for HIV self-testing (IDEaL)**  
 Male (Chichewa)

| Question Name           | Label                                                                                                                                                                                                 | Responses                                                                             |
|-------------------------|-------------------------------------------------------------------------------------------------------------------------------------------------------------------------------------------------------|---------------------------------------------------------------------------------------|
| INTRODUCTION SECTION    |                                                                                                                                                                                                       |                                                                                       |
| interviewer             | Full Name of Interviewer                                                                                                                                                                              |                                                                                       |
| Interview date          | Interview date                                                                                                                                                                                        |                                                                                       |
| Time start              | Time survey started                                                                                                                                                                                   |                                                                                       |
| District                | District                                                                                                                                                                                              |                                                                                       |
| Facility                | Facility                                                                                                                                                                                              |                                                                                       |
| ID                      | ID                                                                                                                                                                                                    |                                                                                       |
| SECTION A: DEMOGRAPHICS |                                                                                                                                                                                                       |                                                                                       |
| Intro Note              | Zikomo povomera kutenga nawo mbali. Pa nthawi ino ndikufunsani ma funso ochepa okhudza za inu komanso kuti ndinu ndani. Chonde khalani omasuka kuyankha moona. Palibe yankho lokhoza komanso lolakwa. |                                                                                       |
| a7                      | Ndinu mtundu wanji wa munthu?                                                                                                                                                                         | 9. Lomwe<br>10. Sena<br>11. Chewa<br>12. Mang'anja/Nyanja<br>13. Ngoni<br>14. Tumbuka |

|      |                                                                                                                             |                                                                                                                             |
|------|-----------------------------------------------------------------------------------------------------------------------------|-----------------------------------------------------------------------------------------------------------------------------|
|      |                                                                                                                             | 15. Tonga<br>16. Yao<br>99. Other, specify                                                                                  |
| a3   | Kodi maphunziro anu mudapita nawo patali bwanji?                                                                            | 1. Pulayimale<br>2. Sekondale<br>3. Koleji                                                                                  |
| a3b  | Ndi kalasi liti munamaliza ya maphunziro anu apamwamba?                                                                     | _____                                                                                                                       |
| a4   | Chonde ganizani za masabata khumi ndi awiri apitawa, mungafotokoze bwanji za ntchito yomwe mumagwira?                       | 1. Ntchito yokhazikika (ya nthawi yayitali)<br>2. Ntchito yosakhazikika (ganyu, ulimi, bizinesi)<br>3. Sindikugwira ntchito |
| a5   | Kodi pakadali pano muli pa banja?                                                                                           | 1. Pa banja<br>2. Kukhala limodzi ngati banja<br>3. Chibwezi Chokhazikika<br>4. Tinasiyana<br>5. Banja linatha<br>99. Zina  |
| a6   | Muli ndi ana angati amoyo?                                                                                                  | _____                                                                                                                       |
| a6b  | Mwana wanu wang'ono ali ndi zaka zingati?                                                                                   | _____                                                                                                                       |
| a6bc | Mwana wanu wang'ono ali ndi zaka zingati?                                                                                   | _____                                                                                                                       |
| a4b  | Pakadali pano ana omwe mumakhala nawo ndi angati?                                                                           | _____                                                                                                                       |
| a7   | Pa miyezi khumi ndi iwiri yapitayi mwakhala ndi abwenzi ogonana nawo angati?                                                | _____                                                                                                                       |
| a8   | Mwakhlapo ndi bwenzi logonana kupatula akazi anu? amuna anu osagwiritsa ntchito kondomu mu miyezi khumi ndi awiri yapitayi? | 1. Eya<br>2. Ayi<br>88. Sindikudziwa<br>89. Akana kuyankha                                                                  |

|                                    |                                                                                                                                                                                                         |                                                                                                                                      |
|------------------------------------|---------------------------------------------------------------------------------------------------------------------------------------------------------------------------------------------------------|--------------------------------------------------------------------------------------------------------------------------------------|
| a8b                                | Mwagananapo ndi munthu osagwiritsa ntchito kondomu mu miyezi khumi ndi awiri yapitayi?                                                                                                                  | <ol style="list-style-type: none"> <li>1. Eya</li> <li>2. Ayi</li> <li>88. Sindikudziwa</li> <li>89. Akana kuyankha</li> </ol>       |
| <b>SECTION B: INCOME QUESTIONS</b> |                                                                                                                                                                                                         |                                                                                                                                      |
| Intro Note                         | Pa nthawi ino ndikufunsani za zipangizo zomwe inu komanso apabanja panu alinazo. Mkati mwakucheza kwathu ndikufunsaninso za ndalama zomwe mulinazo komanso komanso zomwe mumachita kuti mupeze ndalama. |                                                                                                                                      |
| b1                                 | Chonde ganizirani za miyezi Khumi ndi iwiri yapitayi, mungafotokoze bwanji za ntchito yomwe mumagwira?                                                                                                  | <ol style="list-style-type: none"> <li>4. Ntchito yokhazikika</li> <li>5. Ganyu/bisinesi</li> <li>6. Sindikugwira ntchito</li> </ol> |
| b1b                                | Ganizani za ntchito zonse mwagwira mwezi watha. Mwagwira masiku angati olipidwa?                                                                                                                        | _____                                                                                                                                |
| b2                                 | Muli ndi ndalama zilizonse zomwe mukusungira za mtsogolo monga, ku banki, gulu losugira ndalama kapena ndalama zosunga kunyumba?                                                                        | <ol style="list-style-type: none"> <li>2. Eya</li> <li>3. Ayi</li> </ol>                                                             |
| <b>Household Assets</b>            |                                                                                                                                                                                                         |                                                                                                                                      |
| b3                                 | Does your household have:<br><i>The respondent said that his/her household doesn't have any of the household assets. Please probe and ensure that this is correct before you proceed.</i>               |                                                                                                                                      |
| b3_1                               | Denga la malata?                                                                                                                                                                                        | <ol style="list-style-type: none"> <li>1. Eya</li> <li>2. Ayi</li> </ol>                                                             |
| b3_2                               | Magetsi ?                                                                                                                                                                                               | <ol style="list-style-type: none"> <li>1. Eya</li> <li>2. Ayi</li> </ol>                                                             |
| b3_3                               | Koloboyi?                                                                                                                                                                                               | <ol style="list-style-type: none"> <li>1. Eya</li> <li>2. Ayi</li> </ol>                                                             |
| b3_4                               | Nyali?                                                                                                                                                                                                  | <ol style="list-style-type: none"> <li>1. Eya</li> <li>2. Ayi</li> </ol>                                                             |

|              |                                                                                |                  |
|--------------|--------------------------------------------------------------------------------|------------------|
| b3_5         | Wailesi?                                                                       | 1. Eya<br>2. Ayi |
| b3_6         | Kanema?                                                                        | 1. Eya<br>2. Ayi |
| b3_7         | Lamya ya M'manja?                                                              | 1. Eya<br>2. Ayi |
| b3_8         | Kama?                                                                          | 1. Eya<br>2. Ayi |
| b3_9         | Sofa?                                                                          | 1. Eya<br>2. Ayi |
| b3_10        | Tebulo?                                                                        | 1. Eya<br>2. Ayi |
| b3_11        | Filiji?                                                                        | 1. Eya<br>2. Ayi |
| b3_12        | Matilesi?                                                                      | 1. Eya<br>2. Ayi |
| b3_13        | Mipando                                                                        | 1. Eya<br>2. Ayi |
| b3_14        | Ng'ombe?                                                                       | 1. Eya<br>2. Ayi |
| b3_15        | Mbuzi?                                                                         | 1. Eya<br>2. Ayi |
| b3_16        | Nkhosa?                                                                        | 1. Eya<br>2. Ayi |
| b3_17        | Nkhumba?                                                                       | 1. Eya<br>2. Ayi |
| b3_18        | Bulu?                                                                          | 1. Eya<br>2. Ayi |
| b3_19        | Nkhuku?                                                                        | 1. Eya<br>2. Ayi |
| b3_20        | Zoweta zina                                                                    | 1. Eya<br>2. Ayi |
| b4           | Mu masiku makumi atatu apitawa mwamako mowa?                                   | 1. Eya<br>2. Ayi |
| b4b          | Pa masiku makumi atatu apitawa mwamwa mowa masiku angati?                      | _____            |
| b4c          | Mwataya ndalama zingati masiku omaliza omwe munapita ku mowa?                  | MWK:             |
| b4d          | Zonse pamodzi, mwataya ndalama zingati pa mowa mu masiku makumi atatu apitawa? | MWK:             |
| Relationship |                                                                                |                  |

|                        |                                                                                                     |                                                                                                                                                                  |
|------------------------|-----------------------------------------------------------------------------------------------------|------------------------------------------------------------------------------------------------------------------------------------------------------------------|
| Intro Note             | Panthawi ino ndikufunsani za abwezi ogonana nawo?                                                   |                                                                                                                                                                  |
| f8                     | Mwakhala pa ubwenzi ogonana ndi bwenzi lanu kwa nthawi yayitali bwanji?                             | Masiku _____<br>Miyezi _____<br>Zaka _____                                                                                                                       |
| f9                     | Muli ndi ana ndi bwenzi lanu logonana nalo? Ana angati?                                             | _____                                                                                                                                                            |
| f10                    | Mumayankhulana mowirikiza bwanji ndi bwenzi lanu pakadali pano?                                     | 1. Tsiku ndi tsiku<br>2. Masiku angapo pasabata<br>3. Kamodzi pa sabata<br>4. Kangapo pa mwezi<br>5. Kamodzi pa mwezi<br>6. Kosakwana mwezi<br>7. Sitiyankhulani |
| f10b                   | Pa mwezi amalandila ndalama zambiri ndi ndani? Inu kapena bwenzi lanu?                              | 1. Ine<br>2. Bwenzi langa<br>3. Timalandira ndalama zofanana<br>4. Sindikudziwa                                                                                  |
| <b>Decision Making</b> |                                                                                                     |                                                                                                                                                                  |
| Intro Note             | Pa nthawi ino ndikufunsani za momwe mumapangira maganizo ndi bwenzi lanu                            |                                                                                                                                                                  |
| f11                    | Nthawi zambiri ndi ndani amene amapanga chiganizo cha momwe ndalama mumapeze zigwiritsidwe ntchito? | 1. Ine<br>2. Timagwirizana<br>3. Nthawi zambiri bwenzi langa<br>4. Munthu wina<br>5. Sindipeza ndalama<br>88. Sindikufuna kuyankha                               |
| f11b                   | (Ngati yankho ndi 4) Amapanga chiganizo ndi ndani?                                                  | _____                                                                                                                                                            |
| f12                    | Amapanga chiganizo cha momwe ndalama za bwenzi lanu zigwiritsidwe ntchito ndi ndani?                | 1. Ine<br>2. Timagwirizana<br>3. Nthawi zambiri bwenzi langa<br>4. Munthu wina<br>5. Sindipeza ndalama                                                           |



|      |                                                                                                               |                                                                                                                                    |
|------|---------------------------------------------------------------------------------------------------------------|------------------------------------------------------------------------------------------------------------------------------------|
|      |                                                                                                               | 88. Sindikufuna kuyankha                                                                                                           |
| f12b | (Ngati yankho ndi 4)                                                                                          | _____                                                                                                                              |
| f13  | Nthawi zambiri amapanga chiganizo chokhudza thandizo la zaumoyo wanu ndi ndani?                               | 1. Ine<br>2. Timagwirizana<br>3. Nthawi zambiri bwenzi langa<br>4. Munthu wina<br>5. Sindipeza ndalama<br>88. Sindikufuna kuyankha |
| f13b | (Ngati yankho ndi 4) Amapanga chiganizo ndi ndani?                                                            | _____                                                                                                                              |
| f14  | Nthawi zambiri amapanga chiganizo cha thandizo la zaumoyo la mwana yemwe muli naye ndi bwenzi lanu ndi ndani? | 6. Ine<br>7. Mogwirizana<br>8. Nthawi zambiri bwenzi langa<br>9. Munthu wina<br>10. Ndilibe mwana<br>88. Sindikufuna kuyankha      |
| f14b | (if above question=4 ) Who decides?                                                                           | _____                                                                                                                              |
| f15  | Nthawi zambiri amapanga chiganizo chokhudza thandizo la zaumoyo la bwenzi lanu ndi ndani?                     | 1. Ine<br>2. Mogwirizana<br>3. Nthawi zambiri bwenzi langa<br>4. Munthu wina<br>5. Ndilibe ana<br>88.Sindikufuna kuyankha          |
| f15b | (Ngati yankho ndi 4) Amapanga chiganizo ndi ndani?                                                            | _____                                                                                                                              |
| f16  | Kodi amapanga ziganizo zogula katundu mkulumkulu wapakhomo panu ndi ndani?                                    | 1. Ine<br>2. Mogwirizana<br>3. Nthawi zambiri bwenzi langa                                                                         |

|       |                                                                                                                                                                                                                                                                                                                                                                                                                                                                                                                                                                                                                                                                                                                         |                                                                            |
|-------|-------------------------------------------------------------------------------------------------------------------------------------------------------------------------------------------------------------------------------------------------------------------------------------------------------------------------------------------------------------------------------------------------------------------------------------------------------------------------------------------------------------------------------------------------------------------------------------------------------------------------------------------------------------------------------------------------------------------------|----------------------------------------------------------------------------|
|       |                                                                                                                                                                                                                                                                                                                                                                                                                                                                                                                                                                                                                                                                                                                         | <p>4. Munthu wina</p> <p>5. Ndilibe ana</p> <p>88.Sindikufuna kuyankha</p> |
| f16b  | (Ngati yankho ndi 4) Amapanga chiganizo ndani?                                                                                                                                                                                                                                                                                                                                                                                                                                                                                                                                                                                                                                                                          |                                                                            |
| Note  | <p>Ndikufuna ndikufunsemi zokhudzana za (Kuthekela/mwayi) kuti zinthu zina zichitike. Muli nyemba mu kapu. Ndikufunsemi kuti musankhe zina mwa nyemba ndipo muyike mu mbale. Mulingo wa nyemba omwe muyike mu mbale udzafanizira kuti chinachake chichitika. Nyemba imodzi ikusonyeza kuti mwayi ndiochepa kuti chinachake chichitika. Ngati simuika nyemba mm' bale ndekuti mukutsimikiza kuti palibe mwayi oti chinachake chichitika</p>                                                                                                                                                                                                                                                                              |                                                                            |
| note2 | <p>Ngati muyike nyemba zowonjezera mu mbale, zikutanthauza kuti mwayi oti chinachake chichitika uchuluka, mwachitsanzo ngati muyika nyemba imodzi kapena ziwiri mwayi oti chinachake chichitika. Ngakhale pali mwayi ochepa koma chinachake chichitika. Ngati muyike nyemba nkhumu zikutanthauza kuti pali mwayi ofanana oti chinachake chichika kapena ayi. Ngati muyike nyemba zisanu ndi imodzi zikutanthauza kuti mwayi woti chinachake chichitika uli ochulukilapo kuposa mwayi oti chinachake sichichitika. Ngati muyike nyemba zonse khumi ndekuti muli ndi chikhulupiliro chonse kuti chinachake chichitikadi pavute pasavute. Palibe yankho lokhonza kapena lolakwa ndikungofuna kudziwa zomwe mukuganiza.</p> |                                                                            |

|          |                                                                                                                                                                                                                                          |                  |
|----------|------------------------------------------------------------------------------------------------------------------------------------------------------------------------------------------------------------------------------------------|------------------|
| note3    | Ofunsa: Pelekani yankho lanu pa funso lililonse nambala ya nyemba zomwe lili m'bale. Pakutha pa funso lililonse, bwezeletsani nyemba pa tebulo.                                                                                          |                  |
| Practice |                                                                                                                                                                                                                                          |                  |
| pr1      | Sankhani mulingo wa nyemba omwe ukhale ndi kuthekela kumene mukuganiza kuti:                                                                                                                                                             | _____            |
| pr1b     | Mupita ku msika mosachepera kamodzi m'masiku awiri akudzawa                                                                                                                                                                              | _____            |
| pr1c     | Mupita ku msika mosachepera kamodzi m'masabata awiri akudzawa.                                                                                                                                                                           | _____            |
| Practice |                                                                                                                                                                                                                                          |                  |
| pr2      | Ofunsa: kodi oyankha anawonjezera nyamba pakati pa pr1b ndi pr1c                                                                                                                                                                         | 2. Eya<br>0. Ayi |
| pr3      | Kumbukurani kuti pamene nthawi ikupita muzipeza mpata wambiri opita kunsika. Choncho, munayenela kuti mwaika nyemba zambiri m'bale<br><br>Kodi mukuganiza kuti kumsika mupita mosachepela kamodzi bwanji mu nyengo ya ma sabata awiriwa? | _____            |
| f17      | Sankhani mlingo wa nyemba umene ufanizile kaganidwe kanu:                                                                                                                                                                                |                  |
| f17b     | Mukhalabe mukanali pa banja/ndi (bwenzi oposela chaka chimodzi kuchoka pano                                                                                                                                                              | _____            |
| f17c     | Mudzadwala mu miyezi khumi ndi iwiri ikubwelayi                                                                                                                                                                                          | _____            |
| f17d     | Mudzayamba kumwa ma ARV mu miyezi itatu ikubwelayi                                                                                                                                                                                       | _____            |

|                                           |                                                                                                                                                                 |                                                                                                                                                                                                                |
|-------------------------------------------|-----------------------------------------------------------------------------------------------------------------------------------------------------------------|----------------------------------------------------------------------------------------------------------------------------------------------------------------------------------------------------------------|
| f17e                                      | Mudzadziwitsa achibale ndi anzanu za zotsatira zanu za HIV m'miyezi itatu ikubwelayi                                                                            | _____                                                                                                                                                                                                          |
| f17c                                      | Mukusafuna kwanu, anzanu ndi abale azadziwa kuti muli ndi HIV, mu miyezi itatu yapitayi.                                                                        | _____                                                                                                                                                                                                          |
| <b>SELF REPORTED HEALTH AND HAPPINESS</b> |                                                                                                                                                                 |                                                                                                                                                                                                                |
| Intro Note                                | Pa nthawi ino ndikufuna ndikambe nanu zokhudza umoyo ndi chisangalalo chanu.                                                                                    |                                                                                                                                                                                                                |
| e1                                        | Ndili ndi chidwi ndi mukudziwa za umoyo ndi kukhutitsidwa kwanu. Kodi muli okhutitsidwa bwanji ndi moyo wanu, pakutengela zonse.                                | <ol style="list-style-type: none"> <li>6. Okhutitsidwa kwamburi</li> <li>7. Okhutitsidwa pang'ono</li> <li>8. Pakatikati</li> <li>9. Okhutitsidwa pang'ono</li> <li>10. Osakhutitsidwa olo pang'ono</li> </ol> |
| e2                                        | Kodi mukuona ngati muli okhutitsidwa mofanana kapena osakhutitsidwa pang'ono mosaposela anthu ena a muna kapena akazi a msinkhu wanu ndi opezeka m'mudzi mwanu? | <ol style="list-style-type: none"> <li>1. Okhutitsidwa kwambiri</li> <li>2. Okhutitsidwa</li> <li>3. Okhutitsidwa pang'ono</li> </ol>                                                                          |
| e3                                        | Kutengela zonse, Kodi munganene kuti umoyo wanu tsopano uli bwino kwambiri, ulibwino, sulibwino, suli bwino olo pang'ono                                        | <ol style="list-style-type: none"> <li>1. Bwino kwambiri</li> <li>2. Bwino</li> <li>3. Silibwino</li> <li>4. Silibwino olo pang'ono</li> </ol>                                                                 |
| e4                                        | Kodi mungazifananzile bwanji za thanzi lanu ndi la anthu ena a msikhu ofanana ndi wanu, amuna kapena akazi a m'mudzi mwanu.                                     | <ol style="list-style-type: none"> <li>1. A thanzi kwambiri</li> <li>2. A thanzi</li> <li>3. Nthanzi lochepekela</li> </ol>                                                                                    |
| e5                                        | Kodi mwezi wathawu, ndi masiku angati omwe munadwara kwambiri ofika kukulepheretsani kugwira nthito/kupita ku sukulu/kugwira nthito za pa khomo                 | _____                                                                                                                                                                                                          |
| <b>Happiness</b>                          |                                                                                                                                                                 |                                                                                                                                                                                                                |
| e6                                        | Kodi ziganizo izi ndi zowona bwanji kwa inu?                                                                                                                    |                                                                                                                                                                                                                |
| e6_1                                      | Ndinali ndi nkhwana                                                                                                                                             | 1. Ndikugwirizana nazo kwambiri                                                                                                                                                                                |

|                                   |                                                                                                                                             |                                                                                                                                                                                                                                                                     |
|-----------------------------------|---------------------------------------------------------------------------------------------------------------------------------------------|---------------------------------------------------------------------------------------------------------------------------------------------------------------------------------------------------------------------------------------------------------------------|
|                                   |                                                                                                                                             | <ol style="list-style-type: none"> <li>2. Ndikugwirizana nazo</li> <li>3. Sindikugwirizana nazo</li> <li>4. Sindikugwirizana nazo kwambiri</li> </ol>                                                                                                               |
| e6_2                              | Ndimanva ngati moyo wafika                                                                                                                  | <ol style="list-style-type: none"> <li>1. Ndikugwirizana nazo kwambiri</li> <li>2. Ndikugwirizana nazo</li> <li>3. Sindikugwirizana nazo</li> <li>4. Sindikugwirizana nazo kwambiri</li> </ol>                                                                      |
| e6_3                              | Ndimanva kukhutitsidwa                                                                                                                      | <ol style="list-style-type: none"> <li>1. Ndikugwirizana nazo kwambiri</li> <li>2. Ndikugwirizana nazo</li> <li>3. Sindikugwirizana nazo</li> <li>4. Sindikugwirizana nazo kwambiri</li> </ol>                                                                      |
| e6_4                              | Ndimanva kusolidwa                                                                                                                          | <ol style="list-style-type: none"> <li>1. Ndikugwirizana nazo kwambiri</li> <li>2. Ndikugwirizana nazo</li> <li>3. Sindikugwirizana nazo</li> <li>4. Sindikugwirizana nazo kwambiri</li> </ol>                                                                      |
| <b>GENDER EQUITABLE MEN SCALE</b> |                                                                                                                                             |                                                                                                                                                                                                                                                                     |
| Note                              | Chonde ndiuzeni ngati mukugwirizana nazo kwabiri, mukugwirizana nazo, simukugwirizana nazo, simukugwirizana nazo olo pang'ono ziganizo izi: |                                                                                                                                                                                                                                                                     |
| j1                                | Udindo ofunikila wa mzimayi ndi kusamala khomo lake ndi kuphika.                                                                            | <ol style="list-style-type: none"> <li>1. Ndikugwirizana nazo kwambiri</li> <li>2. Ndikugwirizana nazo</li> <li>3. Sindikukhulupilira</li> <li>4. Sindikugwirizana nazo</li> <li>5. Sindikugwirizana nazo olo pang'ono</li> <li>88. Sindikufuna kuyankha</li> </ol> |
| j2                                | Abambo amafuna kugonana kuposa amayi                                                                                                        | <ol style="list-style-type: none"> <li>1. Ndikugwirizana nazo kwambiri</li> <li>2. Ndikugwirizana nazo</li> <li>3. Sindikukhulupilira</li> <li>4. Sindikugwirizana nazo</li> </ol>                                                                                  |

|    |                                                                          |                                                                                                                                                                                     |
|----|--------------------------------------------------------------------------|-------------------------------------------------------------------------------------------------------------------------------------------------------------------------------------|
|    |                                                                          | 5. Sindikugwirizana nazo olo pang'ono<br>88. Sindikufuna kuyankha                                                                                                                   |
| j3 | Azibambo sakonda kukambirana za kugonana amangochita                     | 1. Ndikugwirizana nazo kwambiri<br>2. Ndikugwirizana nazo<br>3. Sindikukhulupilira<br>4. Sindikugwirizana nazo<br>5. Sindikugwirizana nazo olo pang'ono<br>88. Sindikufuna kuyankha |
| j4 | Nthawi zina mzimayi amayenela kumenyedwa.                                | 1. Ndikugwirizana nazo kwambiri<br>2. Ndikugwirizana nazo<br>3. Sindikukhulupilira<br>4. Sindikugwirizana nazo<br>5. Sindikugwirizana nazo olo pang'ono<br>88. Sindikufuna kuyankha |
| j5 | Kusinta matewela, kusambitsa mwana, kudyetsa mwana ndi udindo wa mzimayi | 1. Ndikugwirizana nazo kwambiri<br>2. Ndikugwirizana nazo<br>3. Sindikukhulupilira<br>4. Sindikugwirizana nazo<br>5. Sindikugwirizana nazo olo pang'ono<br>88. Sindikufuna kuyankha |
| j6 | Ndi udindi wa mzimayi kupewa kutenga mimba.                              | 1. Ndikugwirizana nazo kwambiri<br>2. Ndikugwirizana nazo<br>3. Sindikukhulupilira<br>4. Sindikugwirizana nazo<br>5. Sindikugwirizana nazo olo pang'ono<br>88. Sindikufuna kuyankha |
| j7 | Mzibambo ayenela kukhala ndi chiganizo chomaliza cha mnyumba mwake.      | 1. Ndikugwirizana nazo kwambiri<br>2. Ndikugwirizana nazo<br>3. Sindikukhulupilira<br>4. Sindikugwirizana nazo                                                                      |

|      |                                                                                         |                                                                                                                                                                                                                |
|------|-----------------------------------------------------------------------------------------|----------------------------------------------------------------------------------------------------------------------------------------------------------------------------------------------------------------|
|      |                                                                                         | <p>5. Sindikugwirizana nazo olo pang'ono</p> <p>88. Sindikufuna kuyankha</p>                                                                                                                                   |
| j8   | Azibambo amakhala okonzeka ku gonana                                                    | <p>1. Ndikugwirizana nazo kwambiri</p> <p>2. Ndikugwirizana nazo</p> <p>3. Sindikukhulupilira</p> <p>4. Sindikugwirizana nazo</p> <p>5. Sindikugwirizana nazo olo pang'ono</p> <p>Sindikufuna kuyankha</p>     |
| j9   | Mzimayi akuyenela kulekelela nkhaza kuti asunge banja lake.                             | <p>1. Ndikugwirizana nazo kwambiri</p> <p>2. Ndikugwirizana nazo</p> <p>3. Sindikukhulupilira</p> <p>4. Sindikugwirizana nazo</p> <p>5. Sindikugwirizana nazo olo pang'ono</p> <p>Sindikufuna kuyankha</p>     |
| j10a | Ndikhoza kukwiya akaza anga atati andiuze kuti ndigwiritse ntchito kondumu.             | <p>1. Ndikugwirizana nazo kwambiri</p> <p>2. Ndikugwirizana nazo</p> <p>3. Sindikukhulupilira</p> <p>4. Sindikugwirizana nazo</p> <p>5. Sindikugwirizana nazo olo pang'ono</p> <p>88. Sindikufuna kuyankha</p> |
| j10b | Azibambo akhoza kukwiya akazi awo atawauza kuti agwiritse ntchito kondumu               | <p>1. Ndikugwirizana nazo kwambiri</p> <p>2. Ndikugwirizana nazo</p> <p>3. Sindikukhulupilira</p> <p>4. Sindikugwirizana nazo</p> <p>5. Sindikugwirizana nazo olo pang'ono</p> <p>88. Sindikufuna kuyankha</p> |
| j11  | Mzimayi komanso nzibambo agwirizane limodzi kuti agwiritse ntchito njira yanji yakulela | <p>1. Ndikugwirizana nazo kwambiri</p> <p>2. Ndikugwirizana nazo</p> <p>3. Sindikukhulupilira</p> <p>4. Sindikugwirizana nazo</p>                                                                              |



|      |                                                                                               |                                                                                                                                                                                                                                                                |
|------|-----------------------------------------------------------------------------------------------|----------------------------------------------------------------------------------------------------------------------------------------------------------------------------------------------------------------------------------------------------------------|
|      |                                                                                               | 5. Sindikugwirizana nazo olo pang'ono<br>88. Sindikufuna kuyankha                                                                                                                                                                                              |
| j12  | Sindingakhale ndi nzanga wopanga zamathanyula                                                 | 1. Ndikugwirizana nazo kwambiri<br>2. Ndikugwirizana nazo<br>3. Sindikukhulupilira<br>4. Sindikugwirizana nazo<br>5. Sindikugwirizana nazo olo pang'ono<br>88. Sindikufuna kuyankha                                                                            |
| j13a | Ngati munthu angandinyoze, ndiziteza pogwiritsa ntchito mphanvu, ngati ndikufunika kutero.    | 1. Ndikugwirizana nazo kwambiri<br>2. Ndikugwirizana nazo<br>3. Sindikukhulupilira<br>4. Sindikugwirizana nazo<br>5. Sindikugwirizana nazo olo pang'ono<br>88. Sindikufuna kuyankha                                                                            |
| j13b | Ngati munthu anganyoze mzibambo, aziteteze pogwiritsa ntchito mphanvu ngati akufunika kutelo. | 1. Ndikugwirizana nazo kwambiri<br>2. Ndikugwirizana nazo<br>3. Sindikukhulupilira<br>4. Sindikugwirizana nazo<br>5. Sindikugwirizana nazo olo pang'ono<br>Sindikufuna kuyankha                                                                                |
| j14  | Kuti ukhale mzibambo ukufunika kukhala ovuta.                                                 | 1. Ndikugwirizana nazo kwambiri<br>2. Ndikugwirizana nazo<br>3. Sindikukhulupilira<br>4. Sindikugwirizana nazo<br>5. Sindikugwirizana nazo olo pang'ono<br>Sindikufuna kuyankha<br>Sindikugwirizana nazo kwambiri<br>88. Refuse to say<br>Sindikufuna kuyankha |
| j15  | Azibambo akuyenela kunva manyazi ngati akufunika kutota                                       | 1. Ndikugwirizana nazo kwambiri<br>2. Ndikugwirizana nazo                                                                                                                                                                                                      |

|     |                                                                                     |                                                                                                                                                                                                                |
|-----|-------------------------------------------------------------------------------------|----------------------------------------------------------------------------------------------------------------------------------------------------------------------------------------------------------------|
|     |                                                                                     | <p>3. Sindikukhulupilira</p> <p>4. Sindikugwirizana nazo</p> <p>5. Sindikugwirizana nazo olo pang'ono</p> <p>88. Sindikufuna kuyankha</p>                                                                      |
| j16 | Ngati mzibambo wapeleka mimba kwa mzimayi, mwanayo ndi udindo wa anthu onse a wiri. | <p>1. Ndikugwirizana nazo kwambiri</p> <p>2. Ndikugwirizana nazo</p> <p>3. Sindikukhulupilira</p> <p>4. Sindikugwirizana nazo</p> <p>5. Sindikugwirizana nazo olo pang'ono</p> <p>88. Sindikufuna kuyankha</p> |
| j17 | Nzibambo akuyenela kudziwa zomwe bwenzi lake limakonda pogonana                     | <p>1. Ndikugwirizana nazo kwambiri</p> <p>2. Ndikugwirizana nazo</p> <p>3. Sindikukhulupilira</p> <p>4. Sindikugwirizana nazo</p> <p>5. Sindikugwirizana nazo olo pang'ono</p> <p>88. Sindikufuna kuyankha</p> |
| j18 | Kutenga nawo mbali kwa a bambo ndi kofunika polela mwana                            | <p>1. Ndikugwirizana nazo kwambiri</p> <p>2. Ndikugwirizana nazo</p> <p>3. Sindikukhulupilira</p> <p>4. Sindikugwirizana nazo</p> <p>5. Sindikugwirizana nazo olo pang'ono</p> <p>88. Sindikufuna kuyankha</p> |
| j19 | Ndi zofunika kuti abambo azikhala ndi anzawo okambilana nawo mavuto awo.            | <p>1. Ndikugwirizana nazo kwambiri</p> <p>2. Ndikugwirizana nazo</p> <p>3. Sindikukhulupilira</p> <p>4. Sindikugwirizana nazo</p> <p>5. Sindikugwirizana nazo olo pang'ono</p> <p>88. Sindikufuna kuyankha</p> |
| j20 | Banja lizigwirizana limodzi ngati likufuna kukhala ndi mwana                        | <p>1. Ndikugwirizana nazo kwambiri</p> <p>2. Ndikugwirizana nazo</p> <p>3. Sindikukhulupilira</p> <p>4. Sindikugwirizana nazo</p>                                                                              |

|                     |                                                                                                                                                                                                                                    |                                                                                                                                             |
|---------------------|------------------------------------------------------------------------------------------------------------------------------------------------------------------------------------------------------------------------------------|---------------------------------------------------------------------------------------------------------------------------------------------|
|                     |                                                                                                                                                                                                                                    | 5. Sindikugwirizana nazo olo pang'ono<br>88. Sindikufuna kuyankha                                                                           |
| <b>STIGMA</b>       |                                                                                                                                                                                                                                    |                                                                                                                                             |
| Note                | Mugawo lotsatila ndifuna tikambilane zokhudza maganizo anu a anthu omwe ali ndi HIV komanso akukhala mu dela lanu. Chonde khalani omasuka kuyankhula momasuka, palibe yankho lohoza kapena lolakwa. Ndikufuna ndinve maganizo anu. |                                                                                                                                             |
| i3                  | Ndikhoza kugula ndiwo zamasamba kwa munthu oti ndikudziwa kuti ali ndi HIV.                                                                                                                                                        | 1. Ndikugwirizana zano kwambiri<br>2. Ndikugwirizana nazo<br>3. Pakatikati<br>4. Sindikugwirizana nazo<br>5. Sindikugwirizana nazo kwambiri |
| i4                  | Ngati wachibale wanga angadwale AIDS, ndingavomele kumusamala pakhomo panga.                                                                                                                                                       | 1. Ndikugwirizana zano kwambiri<br>2. Ndikugwirizana nazo<br>3. Pakatikati<br>4. Sindikugwirizana nazo<br>5. Sindikugwirizana nazo kwambiri |
| i5                  | M'maganizo mwanga, ngati mphunzitsi wa mkazi ali ndi HIV koma sakudwala, aloledwe kupitiliza kuphunzitsa.                                                                                                                          | 1. Ndikugwirizana zano kwambiri<br>2. Ndikugwirizana nazo<br>3. Pakatikati<br>4. Sindikugwirizana nazo<br>5. Sindikugwirizana nazo kwambiri |
| <b>EXPECTATIONS</b> |                                                                                                                                                                                                                                    |                                                                                                                                             |

|            |                                                                                                                                                                                                                                                                                                                                                                                                                                    |       |
|------------|------------------------------------------------------------------------------------------------------------------------------------------------------------------------------------------------------------------------------------------------------------------------------------------------------------------------------------------------------------------------------------------------------------------------------------|-------|
| Intro Note | Ndikufuna ndikufunseni zokhudzana za (Kuthekela/mwayi) kuti zinthu zina zichitike. Muli nyemba mu kapu. Ndikufunsani kuti musankhe zina mwa nyemba ndipo muyike mu mbale. Mulingo wa nyemba omwe muyike mu mbale udzafanizira kuti chinachake chichitika. Nyemba imodzi ikusonyeza kuti mwayi ndiochepa kuti chinachake chichitika. Ngati simuika nyemba mm'bale ndekuti mukutsimikiza kuti palibe mwayi oti chinachake chichitika |       |
| h4         | Sankhani mulingo wa nyemba omwe ukhale ndi kuthekela kumene mukuganiza kuti:                                                                                                                                                                                                                                                                                                                                                       | _____ |
| h4b        | Mudzakhala mukudalila apabanja panu pa nkhani ya zachuma mu miyezi itatu ikubwelayi.                                                                                                                                                                                                                                                                                                                                               | _____ |
| h4c        | Mukhala mukuthandiza achibale ena pa nkhani za chuma miyezi itatu ikubweyi.                                                                                                                                                                                                                                                                                                                                                        | _____ |
| Note       | Kotsatira ndikufuna ndikufunseni mafunse ochepa okhudza chiyembekezo chanu cha mtsogolo. Ndikudziwa palibe yemmwe amadziwa za mtsogolo koma tiyeni tikambe mongoyelezeka.                                                                                                                                                                                                                                                          |       |
| h5         | Mu chaka chamawa chiyembekezere choti mudzakhala mu:                                                                                                                                                                                                                                                                                                                                                                               |       |
| h5a        | Mudzakhala mutayamba sukulukuchoka lelo chaka chamawa                                                                                                                                                                                                                                                                                                                                                                              | _____ |
| h5b        | Kuyamba buzinesi                                                                                                                                                                                                                                                                                                                                                                                                                   | _____ |
| h5c        | Kutsegula akaunti ku banki                                                                                                                                                                                                                                                                                                                                                                                                         | _____ |
| h5d        | Ku gula malo?                                                                                                                                                                                                                                                                                                                                                                                                                      | _____ |

|                     |                                                                                                                                        |                                  |
|---------------------|----------------------------------------------------------------------------------------------------------------------------------------|----------------------------------|
| h5e                 | Kusunga ndalama?                                                                                                                       | _____                            |
| h5f                 | Kukhala ndi chakudya chochepa?                                                                                                         | _____                            |
| h5g                 | Kukhala pa ntchito yokhazikika                                                                                                         | _____                            |
| Tested for HIV      |                                                                                                                                        |                                  |
| pd2                 | Mwayezetsapo HIV kokwana kangati?<br><i>Enter "-99" if client doesn't remember</i>                                                     | _____                            |
| pd3                 | Komaliza munayezetsa HIV kanali liti?                                                                                                  | a) Chaka _____<br>b) Mwezi _____ |
| pd5                 | Ganizani za ulendo wanu ayamba olandira zotsatira zakuyezadwa kwa HIV. Koyamba kulandira zotsatira zoti akupezani ndi HIV kanali liti? | a) Chaka _____<br>b) Mwezi _____ |
| pd6                 | Have you ever initiated ART?<br>Munayamba mwamapo ma ARV?                                                                              | 2. Eya<br>0. Ayi                 |
| First Initiated ART |                                                                                                                                        |                                  |
| pd6b                | Koyamba kumwa ma ARV kanali liti?                                                                                                      | c. Chaka _____<br>d. Mwezi _____ |
| pd7                 | Munayamba mwachedwako kukatenga mwankhwala masiku ochepela khumi ndi folo?                                                             | 1. Eya<br>0. Ayi                 |
| pd7b                | Masiku angati?                                                                                                                         | _____                            |
| Pd7c                | Munasiya kumwa ma ARV chifukwa chani?                                                                                                  | _____<br>_____                   |
| pd8                 | Mukudziwa munthu wina aliyense                                                                                                         |                                  |

|      |                                                                                                               |                                                                                                                                                                                                                                                    |
|------|---------------------------------------------------------------------------------------------------------------|----------------------------------------------------------------------------------------------------------------------------------------------------------------------------------------------------------------------------------------------------|
|      | yenwe akumwa ma ARV?                                                                                          | 1. Eya<br>0. Ayi                                                                                                                                                                                                                                   |
| pd8b | Pano ganizani za munthu yemwe akumwa ma ARV amene mulinali pafupi<br><br>Mumayankhula naye mowilikiza bwanji? | 1. Siku ndi tsiku<br>2. Kangapo pa sabata<br>3. Kamodzi pa sabata<br>4. Kangapo pa sabata<br>5. Kamodzi kamwezi<br>6. Kochepera kamodzi pa mwezi<br>7. Sitiyankhulana                                                                              |
| pd9  | Munayamba mwaululapo za momwe nthupi mwanu mulili za HIV kwa anthu ena kupatura bwenzi lanu?                  | 1. Eya<br>1. Ayi                                                                                                                                                                                                                                   |
| pd9b | Wina munamuza anali ndani?<br><i>Mark all that apply</i>                                                      | 1. Ntchemwali<br>2. Ntchimwene<br>3. Bambo anga<br>4. Mayi anga<br>5. Malume<br>6. Azakhali anga<br>7. Nzanga<br>8. Apongozi akazi<br>9. Apongozi amuna<br>10. Ana anga<br>11. Ogwira naye ntchito<br>12. Bwezi logonanalo<br>13. Zina, fotokozani |
| pd10 | Pa munthu yemwe munamuwuzana, ndi ndani yemwe mumayankhula naye kawirikawiri?                                 | 1. Ntchemwali<br>2. Ntchimwene<br>3. Bambo anga<br>4. Mayi anga<br>5. Malume<br>6. Azakhali anga<br>7. Nzanga<br>8. Apongozi akazi<br>9. Apongozi amuna<br>10. Ana anga<br>11. Ogwira naye ntchito<br>12. Bwezi logonanalo<br><br>Zina, fotokozani |

|                                        |                                                                                                                                                                                         |                                                                                                                                                                                                                                                                                                                      |
|----------------------------------------|-----------------------------------------------------------------------------------------------------------------------------------------------------------------------------------------|----------------------------------------------------------------------------------------------------------------------------------------------------------------------------------------------------------------------------------------------------------------------------------------------------------------------|
| pd10c                                  | Muntjuyi mumayankhula naye mowirikiza bwani?                                                                                                                                            | <ol style="list-style-type: none"> <li>1. Tsiku ndi tsiku</li> <li>2. Kangapo pa sabata</li> <li>3. Kamodzi pa sabata</li> <li>4. Kangapo pa mwezi</li> <li>5. Kamodzi pa mwezi</li> <li>6. Kochepera kamodzi pa mwezi</li> <li>7. Sitiyankhulana</li> </ol>                                                         |
| <b>PREVIOUS USE OF HEALTH SERVICES</b> |                                                                                                                                                                                         |                                                                                                                                                                                                                                                                                                                      |
| Intro Note                             | Pa ntahwi ino ndifuna tikambilane zokhudza za zomwe mwadutsamo pogwiritsa ntchito thandizo la za umoyo pa chipatala.                                                                    |                                                                                                                                                                                                                                                                                                                      |
| h1                                     | Munayamba mwapitako ku chipatala miyezi khumi ndi iwiri yapitayi.(chifukwa cha inu kapena kupelekeza munthu wina)?                                                                      | <ol style="list-style-type: none"> <li>1. Eya</li> <li>0. Ayi</li> </ol>                                                                                                                                                                                                                                             |
| h2                                     | Mwapita ku chipatala kangati miyezi khumi ndi iwiri yapitayi?                                                                                                                           | _____                                                                                                                                                                                                                                                                                                                |
| h3                                     | Pa nthawi ino ganizani za inu. Mwapita kangati ku chipatala miyezi khumi ndi awiri yapitayi panokha kukalandira thandizo la zaumoyo?                                                    | _____                                                                                                                                                                                                                                                                                                                |
| h_a1                                   | <p>Komaliza kupita kuchipatala(chaka) chifukwa mwadwala ndinu kanali liti?</p> <p>NOTE: PUT WHAT YEAR. (i.e., 2015). If DO NOT REMEMBER, help them estimate. IF NEVER GONE, put -99</p> | _____                                                                                                                                                                                                                                                                                                                |
| h4                                     | Munalandira thandizo lanji ulendo umaliza munapita kuchipatala?                                                                                                                         | <ol style="list-style-type: none"> <li>12. ANC</li> <li>13. Family Planning</li> <li>14. Delivery</li> <li>15. Post-natal</li> <li>16. Under Five<br/>Ku ana</li> <li>17. Kukayezetsa HIV</li> <li>18. ARV</li> <li>19. (OPD) Kudwala</li> <li>20. (OPD)Kuvulala</li> <li>21. Kukonana ndi dotolo wa manu</li> </ol> |



|      |                                                                                                                     |                                                                                                                                                                                                                  |
|------|---------------------------------------------------------------------------------------------------------------------|------------------------------------------------------------------------------------------------------------------------------------------------------------------------------------------------------------------|
|      |                                                                                                                     | 22. Palibe                                                                                                                                                                                                       |
| h_a2 | Tsopano ganizani za kachiwiri komwe munapita kuchipatala nokha cha posachedwapa. Munapita ku chiptala chaka chanji? | _____                                                                                                                                                                                                            |
| c3   | Chonde ganizani za ulendo wanu munapita kuchipatala chaposachedwa, kuphatikizapo lelo. Munapita lelo?               | c. Chaka _____<br>d. Mwezi _____<br>Mwezi                                                                                                                                                                        |
| c4   | Munapita ku chipatala chiti                                                                                         | 1. Chipatala chomwe mumapita pakali pano<br>2. Chipatala china, tchulani                                                                                                                                         |
| c5   | Munapita kukalandila thandizo lanji ku chipatala?                                                                   | 1. ANC<br>2. Family Planning<br>3. Delivery<br>4. Post-natal<br>5. Under Five<br>Ku ana<br>6. Kukayezetsa HIV<br>7. ARV<br>8. (OPD) Kudwala<br>9. (OPD)Kuvulala<br>10. Kukonana ndi dotolo wa manu<br>11. Palibe |
| c5b  | Amene analandira thandizo la zaumoyo anali ndani?                                                                   | 1. Ineyo<br>2. Mwana wanga<br>3. Bwenzi langa<br>4. Wapabanja panga<br>5. Mzanga<br>99. Zina, fotokozani _____                                                                                                   |
| c6a  | Inu kapena munthu yemwe munapita naye kuchipatala analandila munthu wina wathandizo la zaumoyo?                     | 2. Eya<br>0. Ayi                                                                                                                                                                                                 |
| c6   | Thandizo lachiwiri la zaumyo lomwe manalandira linali lanji?                                                        | 1. ANC<br>2. Family Planning<br>3. Delivery<br>4. Post-natal<br>5. Under Five<br>Ku ana<br>6. Kukayezetsa HIV<br>7. ARV<br>8. (OPD) Kudwala                                                                      |

|                      |                                                                                                                                                                                                                                                           |                                                                                                                           |
|----------------------|-----------------------------------------------------------------------------------------------------------------------------------------------------------------------------------------------------------------------------------------------------------|---------------------------------------------------------------------------------------------------------------------------|
|                      |                                                                                                                                                                                                                                                           | <p>9. (OPD)Kuvulala</p> <p>10. Kukonana ndi dotolo wa manu</p> <p>11. Palibe</p>                                          |
| c6b                  | Analandira thandizo la zaumoyo anali ndani?                                                                                                                                                                                                               | <p>1. Ine</p> <p>2. Mwana wanga</p> <p>3. Bwezi langa</p> <p>4. Wapabanja panga</p> <p>5. Nzanga Zina, fotokozani</p>     |
| Service Satisfaction |                                                                                                                                                                                                                                                           |                                                                                                                           |
| c10                  | Pa nthawi ino ndikufuna ndikufunsi za kukhutila kwanu ndi thandizo la zaumoyo munalandila pa tsikulo. Chinde nduuzeni ngai zina mwazotsatirazi zinli vito kwa inu patsiku lomwe munapita kuchipatala, ngati eya, ngati vutolo linali lalikulu kapena ayi. |                                                                                                                           |
| c10_1                | Nthawi yomwe mumafuna kuonana ndi dotolo                                                                                                                                                                                                                  | <p>1. Vuto kwambiri</p> <p>2. Vuto pang'ono</p> <p>3. Silinali vuto</p> <p>88. Not applicable</p> <p>98. Sindikudziwa</p> |
| c10_2                | Kuthekela kokambilana za mavuto anu a pakati.                                                                                                                                                                                                             | <p>1. Vuto kwambiri</p> <p>2. Vuto pang'ono</p> <p>0. Silinali vuto</p> <p>88. Not applicable</p> <p>98. Sindikudziwa</p> |
| c10_3                | Mulingo waku Kufotokozeledwa munalandira okhudza vuto lanu kapena thandizo.                                                                                                                                                                               | <p>1. Vuto kwambiri</p> <p>2. Vuto pang'ono</p> <p>0. Silinali vuto</p> <p>88. Not applicable</p> <p>98. Sindikudziwa</p> |
| c10_4                | Chinsinsi kuopetsa ena kuwona zotsatila za umoyo                                                                                                                                                                                                          | <p>1. Vuto kwambiri</p> <p>2. Vuto pang'ono</p> <p>0. Silinali vuto</p> <p>88. Not applicable</p> <p>98. Sindikudziwa</p> |

|        |                                                                                     |                                                                                                                        |
|--------|-------------------------------------------------------------------------------------|------------------------------------------------------------------------------------------------------------------------|
| c10_5  | Chinsinsi kuopa ena kunva za zokambilana zanu                                       | 1. Vuto kwambiri<br>2. Vuto pang'ono<br>0. Silinali vuto<br><br>88. Not applicable<br>98. Sindikudziwa                 |
| c10_6  | Kupezeka kwa mankwala mzipatala                                                     | 1. Vuto kwambiri<br>2. Vuto pang'ono<br>0. Silinali vuto<br><br>88. Not applicable<br>98. Sindikudziwa                 |
| c10_7  | Ma ola omwe thandizo limapelekedwa pa chipatala i.e thawi yotsegulila ndi yotsekela | 1. Vuto kwambiri<br>2. Vuto pang'ono<br>0. Silinali vuto<br><br>88. Not applicable<br>98. Sindikudziwa                 |
| c10_8  | Masiku omwe mumalandila thandizo                                                    | 1. Vuto kwambiri<br>2. Vuto pang'ono<br>0. Silinali vuto<br><br>88. Not applicable<br>98. Sindikudziwa<br>Sindikudziwa |
| c10_9  | Ukhondo wa pa chipatala                                                             | 1. Vuto kwambiri<br>2. Vuto pang'ono<br>0. Silinali vuto<br><br>88. Not applicable<br>98. Sindikudziwa                 |
| c10_10 | Momwe ogwira ntchito amakusamalilani                                                | 1. Vuto kwambiri<br>2. Vuto pang'ono<br>0. Silinali vuto<br><br>88. Not applicable<br>98. Sindikudziwa                 |
| c10_11 | Mtengo wa thandizo ndi mankwala                                                     | 1. Vuto kwambiri<br>2. Vuto pang'ono<br>1. Silinali vuto<br><br>88. Not applicable<br>98. Sindikudziwa                 |

| Satisfaction       |                                                                                                                         |                                                                                                                                                                                                                                                                                                     |
|--------------------|-------------------------------------------------------------------------------------------------------------------------|-----------------------------------------------------------------------------------------------------------------------------------------------------------------------------------------------------------------------------------------------------------------------------------------------------|
| c11                | Ndi chiganizo chiti chomwe chikufotokoza za maganizo anu okhudza thandizo lomwe munalandila pa chipatala?               | <ol style="list-style-type: none"> <li>1. Ndili okhutitsidwa kwabiri ndi thandizo ndinalandila.</li> <li>2. Ndili okhutitsidwa ndi thandizo ndinalandila.</li> <li>3. Sindili okhutitsidwa ndi thandizo ndinalandila</li> <li>4. Sindili okhutitsidwa kwambiri ndi thandizo ndinalandila</li> </ol> |
| c12                | Munatchulako za chipatalachi kwa nzanu kapena wachibale?                                                                | <ol style="list-style-type: none"> <li>2. Eya</li> <li>0. Ayi</li> </ol>                                                                                                                                                                                                                            |
| Comment            | Tafika pamapeto a kucheza kwathu. Zikomo chifukwa cha nthawi yanu. Pali chili chonse mukufuna kuwonjezera?              |                                                                                                                                                                                                                                                                                                     |
| End Note           | Thank the participant for their time and give them transport reimbursement, if they did not come for an ART appointment |                                                                                                                                                                                                                                                                                                     |
| Comments           | Enumerator comments                                                                                                     |                                                                                                                                                                                                                                                                                                     |
| End of the survey! |                                                                                                                         |                                                                                                                                                                                                                                                                                                     |

1  
2  
3 **14.6. APPENDIX F: Baseline survey – Female**  
4  
5

---

6  
7  
8 **BASELINE SURVEY**  
9 **Identifying efficient linkage strategies for HIV self-testing (IDEaL)**  
10 Female  
11

---

12  
13  
14  
15  
16  
17  
18  
19

| INTRODUCTION SECTION |                          |  |
|----------------------|--------------------------|--|
| interviewer          | Full Name of Interviewer |  |
| Interview date       | Interview date           |  |
|                      |                          |  |
| Time start           | Time survey started      |  |
| District             | District                 |  |
| Facility             | Facility                 |  |
| ID                   | ID                       |  |

20  
21  
22  
23  
24  
25  
26  
27  
28  
29  
30  
31  
32  
33  
34  
35  
36  
37  
38  
39  
40  
41  
42  
43  
44  
45  
46  
47  
48  
49  
50  
51  
52  
53  
54  
55  
56  
57  
58  
59  
60

| SECTION A: DEMOGRAPHICS |                                                                                                                                                                                     |                                                                                                                                                                                                                                |
|-------------------------|-------------------------------------------------------------------------------------------------------------------------------------------------------------------------------------|--------------------------------------------------------------------------------------------------------------------------------------------------------------------------------------------------------------------------------|
| Intro Note              | Thank you for agreeing to participate. Now I will ask you a few questions about yourself and who you are. Please feel free to answer honestly. There are no right or wrong answers. |                                                                                                                                                                                                                                |
| a7                      | What is your tribe?                                                                                                                                                                 | <ol style="list-style-type: none"> <li>1. Lomwe</li> <li>2. Sena</li> <li>3. Chewa</li> <li>4. Mang'anja/Nyanja</li> <li>5. Ngoni</li> <li>6. Tumbuka</li> <li>7. Tonga</li> <li>8. Yao</li> <li>99. Other, specify</li> </ol> |
| a3                      | What is the highest level of school you attended?                                                                                                                                   | <ol style="list-style-type: none"> <li>1. Primary</li> <li>2. Secondary</li> <li>3. Higher</li> </ol>                                                                                                                          |
| a3b                     | What class did you complete in your highest level of school?                                                                                                                        | _____                                                                                                                                                                                                                          |
| a4                      | Please think of the past 12 months, how would you describe your primary occupation?                                                                                                 | <ol style="list-style-type: none"> <li>1. Working formally (employed full time)</li> <li>2. Working informally (ganyu, farming, business)</li> <li>3. Not working</li> </ol>                                                   |
| a5                      | Are you currently married?                                                                                                                                                          | <ol style="list-style-type: none"> <li>1. Married</li> <li>2. Live-in partner</li> <li>3. Steady Boyfriend</li> <li>4. Separated</li> <li>5. Divorced</li> </ol>                                                               |

|                                    |                                                                                                                                                                                                                             |                                                                                                                |
|------------------------------------|-----------------------------------------------------------------------------------------------------------------------------------------------------------------------------------------------------------------------------|----------------------------------------------------------------------------------------------------------------|
|                                    |                                                                                                                                                                                                                             | 99. Other, specify                                                                                             |
| a6                                 | How many living children do you have?                                                                                                                                                                                       | _____                                                                                                          |
| a6b                                | What is the age of your <u>youngest</u> child?                                                                                                                                                                              | _____                                                                                                          |
| a6bc                               | What age is the child (in years or months)                                                                                                                                                                                  | _____                                                                                                          |
| a4b                                | How many children currently live with you?                                                                                                                                                                                  | _____                                                                                                          |
| a7                                 | How many sexual partners have you had in the past 12 months?                                                                                                                                                                | _____                                                                                                          |
| a8                                 | Have you had sex with someone besides your husband without a condom in the past 12 months?                                                                                                                                  | 2. Yes<br>0. No<br>88. Don't know/ Not sure<br>89. Refused to answer                                           |
| a8b                                | Have you had sex without a condom in the past 12 months?                                                                                                                                                                    | 2. Yes<br>0. No<br>88. Don't know/ Not sure<br>89. Refused to answer                                           |
| <b>SECTION B: INCOME QUESTIONS</b> |                                                                                                                                                                                                                             |                                                                                                                |
| Intro Note                         | I will now discuss with you about the valuable items that you or your household possesses. As I will be chatting with you I will also some questions about money you have and activities that you indulge in to find money. |                                                                                                                |
| b1                                 | Please think of the past 12 months, how would you describe your primary occupation?                                                                                                                                         | 1. Working formally (employed full time)<br>2. Working informally (ganyu, farming, business)<br>3. Not working |

|                  |                                                                                                                                                                                           |                 |
|------------------|-------------------------------------------------------------------------------------------------------------------------------------------------------------------------------------------|-----------------|
| b1b              | Think about all the work you have done in the past month. How many days did you normally work this month that gave you pay?                                                               | _____           |
| b2               | Do you have any savings for the future, such as a bank account, savings group or cash?                                                                                                    | 2. Yes<br>0. No |
| Household Assets |                                                                                                                                                                                           |                 |
| b3               | Does your household have:<br><i>The respondent said that his/her household doesn't have any of the household assets. Please probe and ensure that this is correct before you proceed.</i> |                 |
| b3_1             | Metal Roof?                                                                                                                                                                               | 2. Yes<br>0. No |
| b3_2             | Electricity?                                                                                                                                                                              | 2. Yes<br>0. No |
| b3_3             | Paraffin lamp with no glass?                                                                                                                                                              | 2. Yes<br>0. No |
| b3_4             | A paraffin lamp?                                                                                                                                                                          | 2. Yes<br>0. No |
| b3_5             | A radio?                                                                                                                                                                                  | 2. Yes<br>0. No |
| b3_6             | A television?                                                                                                                                                                             | 2. Yes<br>0. No |
| b3_7             | A cellular phone?                                                                                                                                                                         | 2. Yes<br>0. No |
| b3_8             | A bed?                                                                                                                                                                                    | 2. Yes<br>0. No |
| b3_9             | A sofa set?                                                                                                                                                                               | 2. Yes<br>0. No |
| b3_10            | A table?                                                                                                                                                                                  | 2. Yes          |



|              |                                                                                   |                 |
|--------------|-----------------------------------------------------------------------------------|-----------------|
|              |                                                                                   | 0. No           |
| b3_11        | A refrigerator                                                                    | 2. Yes<br>0. No |
| b3_12        | Mattress?                                                                         | 2. Yes<br>0. No |
| b3_13        | Chair(s)?                                                                         | 2. Yes<br>0. No |
| b3_14        | Cattle?                                                                           | 2. Yes<br>0. No |
| b3_15        | Goat?                                                                             | 2. Yes<br>0. No |
| b3_16        | Sheep?                                                                            | 2. Yes<br>0. No |
| b3_17        | Pigs?                                                                             | 2. Yes<br>0. No |
| b3_18        | Donkey?                                                                           | 2. Yes<br>0. No |
| b3_19        | Chickens?                                                                         | 2. Yes<br>0. No |
| b3_20        | Other poultry?                                                                    | 2. Yes<br>0. No |
| b4           | In the past 30 days, have you drank beer?                                         | 2. Yes<br>0. No |
| b4b          | How many days in the past 30 days have you drank beer?                            | _____           |
| b4c          | How much money did you spend on beer the last time you went?                      | MWK:            |
| b4d          | In total, approximately how much money did you spend on beer in the past 30 days? | MWK:            |
| Relationship |                                                                                   |                 |

|                                                                            |                 |                                                                                |                                                                                                                                                                      |
|----------------------------------------------------------------------------|-----------------|--------------------------------------------------------------------------------|----------------------------------------------------------------------------------------------------------------------------------------------------------------------|
| 1<br>2<br>3<br>4<br>5<br>6                                                 | Intro Note      | Now I'd like to talk to you about your current sexual relationship             |                                                                                                                                                                      |
| 7<br>8<br>9<br>10<br>11                                                    | f8              | How long have you been/were you in a sexual relationship with your partner?    | Days _____<br>Months _____<br>Years _____                                                                                                                            |
| 12<br>13<br>14                                                             | f9              | Do you have children with your partner?<br>How many children?                  | _____                                                                                                                                                                |
| 15<br>16<br>17<br>18<br>19<br>20<br>21<br>22<br>23                         | f10             | How often do you currently talk to your partner?                               | 1. Everyday<br>2. A couple times a week<br>3. Once a week<br>4. A couple times a month<br>5. Once a month<br>6. Less than once a month<br>7. Not at all (never)      |
| 24<br>25<br>26<br>27<br>28<br>29                                           | f10b            | In a typical month, who earns more money? You, or your partner?                | 1. Myself<br>2. This partner<br>3. We earn the same amount<br><br>88. Don't know                                                                                     |
| 30                                                                         | Decision Making |                                                                                |                                                                                                                                                                      |
| 31<br>32<br>33<br>34                                                       | Intro Note      | Now I would like to talk to you about how you and your partner make decisions. |                                                                                                                                                                      |
| 35<br>36<br>37<br>38<br>39<br>40<br>41<br>42<br>43                         | f11             | Who usually decides how the money you earn will be used?                       | 1. Yourself (Respondent)<br>2. Jointly (This partner and you together)<br>3. Mainly this partner<br>4. Someone else<br>5. Do not earn money<br><br>88. Refuse to say |
| 44<br>45<br>46<br>47                                                       | f11b            | (if above question=4 ) Who decides?                                            | _____                                                                                                                                                                |
| 48<br>49<br>50<br>51<br>52<br>53<br>54<br>55<br>56<br>57<br>58<br>59<br>60 | f12             | Who usually decides how your partner's earnings will be used?                  | 1. Yourself (Respondent)<br>2. Jointly (This partner and you together)<br>3. Mainly this partner<br>4. Someone else<br>5. Do not earn money<br><br>88. Refuse to say |

|      |                                                                                 |                                                                                                                                                                                                                                                                    |
|------|---------------------------------------------------------------------------------|--------------------------------------------------------------------------------------------------------------------------------------------------------------------------------------------------------------------------------------------------------------------|
| f12b | (if above question=4 ) Who decides?                                             | _____                                                                                                                                                                                                                                                              |
| f13  | Who usually makes decisions about health care for yourself?                     | <ol style="list-style-type: none"> <li>1. Yourself (Respondent)</li> <li>2. Jointly (This partner and you together)</li> <li>3. Mainly this partner</li> <li>4. Someone else</li> <li>5. Not applicable/ Don't have children</li> <li>88. Refuse to say</li> </ol> |
| f13b | (if above question=4 ) Who decides?                                             | _____                                                                                                                                                                                                                                                              |
| f14  | Who usually makes decisions about health care for your child with this partner? | <ol style="list-style-type: none"> <li>1. Yourself (Respondent)</li> <li>2. Jointly (This partner and you together)</li> <li>3. Mainly this partner</li> <li>4. Someone else</li> <li>5. Not applicable/ Don't have children</li> <li>88. Refuse to say</li> </ol> |
| f14b | (if above question=4 ) Who decides?                                             | _____                                                                                                                                                                                                                                                              |
| f15  | Who usually makes decisions about health care for your partner?                 | <ol style="list-style-type: none"> <li>1. Yourself (Respondent)</li> <li>2. Jointly (This partner and you together)</li> <li>3. Mainly this partner</li> <li>4. Someone else</li> <li>5. Not applicable/ Don't have children</li> <li>88. Refuse to say</li> </ol> |
| f15b | (if above question=4 ) Who decides?                                             | _____                                                                                                                                                                                                                                                              |
| f16  | Who usually makes decisions about making major household purchases?             | <ol style="list-style-type: none"> <li>1. Yourself (Respondent)</li> <li>2. Jointly (This partner and you together)</li> <li>3. Mainly this partner</li> <li>4. Someone else</li> </ol>                                                                            |

|          |                                                                                                                                                                                                                                                                                                                                                                                                                                                                                                                                                                                                                                                                   |                                                             |
|----------|-------------------------------------------------------------------------------------------------------------------------------------------------------------------------------------------------------------------------------------------------------------------------------------------------------------------------------------------------------------------------------------------------------------------------------------------------------------------------------------------------------------------------------------------------------------------------------------------------------------------------------------------------------------------|-------------------------------------------------------------|
|          |                                                                                                                                                                                                                                                                                                                                                                                                                                                                                                                                                                                                                                                                   | 5. Not applicable/ Don't have children<br>88. Refuse to say |
| f16b     | (if above question=4 ) Who decides?                                                                                                                                                                                                                                                                                                                                                                                                                                                                                                                                                                                                                               |                                                             |
| Note     | I would like to ask you questions about [probability/chance/likelihood] that certain things will happen. There are ten beans in this cup. I will ask you to pick some of the beans and put them in the plate. The number of beans that you are going to put in the plate will reflect the probability that something will happen. One bean means there is very little chance that something will happen. If you do not put any bean in the plate it means you are certain that there is no likelihood that something will happen.                                                                                                                                 |                                                             |
| note2    | If you put additional beans in the plate it means the chance that something will happen will also increase. For example, if you put one or two beans in the plate, it means there is little chance that something will happen. Even though there is little chance but it can happen. If you put ten beans it means there is equal chance of something happening or not. If you put six beans it means the chance that something will happen is slightly greater than not happening. If you put all ten beans, it means you are certain that whatever the case something will really happen. There is no wrong or right answer I just want to know what you think. |                                                             |
| note3    | INTERVIEWER: Report for each question the NUMBER OF BEANS put in the PLATE. After each question, replace the beans on the table (unless otherwise noted).                                                                                                                                                                                                                                                                                                                                                                                                                                                                                                         |                                                             |
| Practice |                                                                                                                                                                                                                                                                                                                                                                                                                                                                                                                                                                                                                                                                   |                                                             |
| pr1      | Pick the number of beans that reflects how likely you think it is that:                                                                                                                                                                                                                                                                                                                                                                                                                                                                                                                                                                                           | _____                                                       |

|                                           |                                                                                                                                                                                                                                                                                                                                                                                                                        |                 |
|-------------------------------------------|------------------------------------------------------------------------------------------------------------------------------------------------------------------------------------------------------------------------------------------------------------------------------------------------------------------------------------------------------------------------------------------------------------------------|-----------------|
| pr1b                                      | You will go to the market at least once within the next 2 days.                                                                                                                                                                                                                                                                                                                                                        | _____           |
| pr1c                                      | You will go to the market at least once within the next 2 weeks.                                                                                                                                                                                                                                                                                                                                                       | _____           |
| <b>Practice</b>                           |                                                                                                                                                                                                                                                                                                                                                                                                                        |                 |
| pr2                                       | INTERVIEWER: Did Respondent add any beans between pr1b and pr1c?                                                                                                                                                                                                                                                                                                                                                       | 2. Yes<br>0. No |
| pr3                                       | Remember, as time goes by, you may find more time to go to the market. Therefore, you should have added beans to the plate. Let me ask you again. Now, add beans in the plate so that the number of beans in the plate reflects how likely you think it is that you will go to the market at least once within 2 weeks.<br><br>How likely you think it is that you will go to the market at least once within 2 weeks? | _____           |
| f17                                       | Pick the number of beans that reflects how likely you think:                                                                                                                                                                                                                                                                                                                                                           |                 |
| f17a                                      | You will still be married/with [partner one year from now.                                                                                                                                                                                                                                                                                                                                                             | _____           |
| f17b                                      | Your partner will become sick during the next 12 months                                                                                                                                                                                                                                                                                                                                                                | _____           |
| f17c                                      | Your partner will start ART treatment in the next 3 months                                                                                                                                                                                                                                                                                                                                                             | _____           |
| f17d                                      | Your partner will disclose your HIV status to your close friends/family in the next 3 months                                                                                                                                                                                                                                                                                                                           | _____           |
| <b>SELF REPORTED HEALTH AND HAPPINESS</b> |                                                                                                                                                                                                                                                                                                                                                                                                                        |                 |
| Intro Note                                | Now I'd like to talk to you about how healthy and happy you feel.                                                                                                                                                                                                                                                                                                                                                      |                 |

|                                   |                                                                                                                                             |                                                                                                                                                                                      |
|-----------------------------------|---------------------------------------------------------------------------------------------------------------------------------------------|--------------------------------------------------------------------------------------------------------------------------------------------------------------------------------------|
| e1                                | I am interested in your general level of well-being or satisfaction with life. How satisfied are you with your life, all things considered? | <ol style="list-style-type: none"> <li>1. Very satisfied</li> <li>2. Somewhat satisfied</li> <li>3. Neutral</li> <li>4. Somewhat unsatisfied</li> <li>5. Very unsatisfied</li> </ol> |
| e2                                | Do you think that you are more, equally or less satisfied than other persons your age and sex living in your village?                       | <ol style="list-style-type: none"> <li>1. More satisfied</li> <li>2. Equally satisfied</li> <li>3. Less satisfied</li> </ol>                                                         |
| e3                                | In general, would you say your health now is: very good, good, poor or very poor?                                                           | <ol style="list-style-type: none"> <li>1. Very good</li> <li>2. Good</li> <li>3. Poor</li> <li>4. Very poor</li> </ol>                                                               |
| e4                                | How would you compare your health to other people of the same age and sex in your village?                                                  | <ol style="list-style-type: none"> <li>1. More healthy</li> <li>2. Equally healthy</li> <li>3. Less healthy</li> </ol>                                                               |
| e5                                | In the past month, how many days were you too sick to work/go to school/complete household chores?                                          | _____                                                                                                                                                                                |
| <b>Happiness</b>                  |                                                                                                                                             |                                                                                                                                                                                      |
| e6                                | How true are the following statements for you in the last month?                                                                            |                                                                                                                                                                                      |
| e6_1                              | I have felt depressed                                                                                                                       | <ol style="list-style-type: none"> <li>1. Strongly Agree</li> <li>2. Agree</li> <li>3. Disagree</li> <li>4. Strongly Disagree</li> </ol>                                             |
| e6_2                              | I have felt life was not worth living                                                                                                       | <ol style="list-style-type: none"> <li>1. Strongly Agree</li> <li>2. Agree</li> <li>3. Disagree</li> <li>4. Strongly Disagree</li> </ol>                                             |
| e6_3                              | I have felt content.                                                                                                                        | <ol style="list-style-type: none"> <li>1. Strongly Agree</li> <li>2. Agree</li> <li>3. Disagree</li> <li>4. Strongly Disagree</li> </ol>                                             |
| e6_4                              | I have felt lonely                                                                                                                          | <ol style="list-style-type: none"> <li>1. Strongly Agree</li> <li>2. Agree</li> <li>3. Disagree</li> <li>4. Strongly Disagree</li> </ol>                                             |
| <b>GENDER EQUITABLE MEN SCALE</b> |                                                                                                                                             |                                                                                                                                                                                      |

|      |                                                                                                            |                                                                                                                                                                                      |
|------|------------------------------------------------------------------------------------------------------------|--------------------------------------------------------------------------------------------------------------------------------------------------------------------------------------|
| Note | Please tell me if you strongly agree, agree, disagree, or strongly disagree with the following statements: |                                                                                                                                                                                      |
| j1   | Woman's most important role is to take care of her home and cook (take care of home is about housekeeping) | <ol style="list-style-type: none"> <li>1. Strongly Agree</li> <li>2. Agree</li> <li>3. Unsure</li> <li>4. Disagree</li> <li>5. Strongly Disagree</li> </ol> <p>88. Refuse to say</p> |
| j2   | Men need sex more than women                                                                               | <ol style="list-style-type: none"> <li>1. Strongly Agree</li> <li>2. Agree</li> <li>3. Unsure</li> <li>4. Disagree</li> <li>5. Strongly Disagree</li> </ol> <p>88. Refuse to say</p> |
| j3   | Men don't talk about sex, they just do it.                                                                 | <ol style="list-style-type: none"> <li>1. Strongly Agree</li> <li>2. Agree</li> <li>3. Unsure</li> <li>4. Disagree</li> <li>5. Strongly Disagree</li> </ol> <p>88. Refuse to say</p> |
| j4   | There are times when a woman deserves to be beaten                                                         | <ol style="list-style-type: none"> <li>1. Strongly Agree</li> <li>2. Agree</li> <li>3. Unsure</li> <li>4. Disagree</li> <li>5. Strongly Disagree</li> </ol> <p>88. Refuse to say</p> |
| j5   | Changing diapers, giving kids a bath & feeding kids are mother's responsibility                            | <ol style="list-style-type: none"> <li>1. Strongly Agree</li> <li>2. Agree</li> <li>3. Unsure</li> <li>4. Disagree</li> <li>5. Strongly Disagree</li> </ol> <p>88. Refuse to say</p> |
| j6   | It is a woman's responsibility to avoid getting pregnant                                                   | <ol style="list-style-type: none"> <li>1. Strongly Agree</li> <li>2. Agree</li> <li>3. Unsure</li> <li>4. Disagree</li> <li>5. Strongly Disagree</li> </ol> <p>88. Refuse to say</p> |

|      |                                                                            |                                                                                                                                                                                      |
|------|----------------------------------------------------------------------------|--------------------------------------------------------------------------------------------------------------------------------------------------------------------------------------|
| j7   | A man should have the final word about decisions in his home               | <ol style="list-style-type: none"> <li>1. Strongly Agree</li> <li>2. Agree</li> <li>3. Unsure</li> <li>4. Disagree</li> <li>5. Strongly Disagree</li> </ol> <p>88. Refuse to say</p> |
| j8   | Men are always ready to have sex                                           | <ol style="list-style-type: none"> <li>1. Strongly Agree</li> <li>2. Agree</li> <li>3. Unsure</li> <li>4. Disagree</li> <li>5. Strongly Disagree</li> </ol> <p>88. Refuse to say</p> |
| j9   | A woman should tolerate violence in order to keep her family together      | <ol style="list-style-type: none"> <li>1. Strongly Agree</li> <li>2. Agree</li> <li>3. Unsure</li> <li>4. Disagree</li> <li>5. Strongly Disagree</li> </ol> <p>88. Refuse to say</p> |
| j10a | I would be outraged if my wife asked me to use a condom.                   | <ol style="list-style-type: none"> <li>1. Strongly Agree</li> <li>2. Agree</li> <li>3. Unsure</li> <li>4. Disagree</li> <li>5. Strongly Disagree</li> </ol> <p>88. Refuse to say</p> |
| j10b | Men would be outraged if their wife asked them to use a condom             | <ol style="list-style-type: none"> <li>1. Strongly Agree</li> <li>2. Agree</li> <li>3. Unsure</li> <li>4. Disagree</li> <li>5. Strongly Disagree</li> </ol> <p>88. Refuse to say</p> |
| j11  | A man and a woman should decide together what type of contraceptive to use | <ol style="list-style-type: none"> <li>1. Strongly Agree</li> <li>2. Agree</li> <li>3. Unsure</li> <li>4. Disagree</li> <li>5. Strongly Disagree</li> </ol> <p>88. Refuse to say</p> |
| j12  | I would never have a homosexual friend                                     | <ol style="list-style-type: none"> <li>1. Strongly Agree</li> <li>2. Agree</li> <li>3. Unsure</li> <li>4. Disagree</li> </ol>                                                        |



|      |                                                                                       |                                                                                                        |
|------|---------------------------------------------------------------------------------------|--------------------------------------------------------------------------------------------------------|
|      |                                                                                       | 5. Strongly Disagree<br>88. Refuse to say                                                              |
| j13a | If someone insults me, I will defend my reputation, with force if I have to.          | 1. Strongly Agree<br>2. Agree<br>3. Unsure<br>4. Disagree<br>5. Strongly Disagree<br>88. Refuse to say |
| j13b | If someone insults a man, he should defend his reputation, with force if he has to    | 1. Strongly Agree<br>2. Agree<br>3. Unsure<br>4. Disagree<br>5. Strongly Disagree<br>88. Refuse to say |
| j14  | To be a man you need to be tough.                                                     | 1. Strongly Agree<br>2. Agree<br>3. Unsure<br>4. Disagree<br>5. Strongly Disagree<br>88. Refuse to say |
| j15  | Men should be embarrassed if unable to get an erection                                | 1. Strongly Agree<br>2. Agree<br>3. Unsure<br>4. Disagree<br>5. Strongly Disagree<br>88. Refuse to say |
| j16  | If a guy gets a woman pregnant, child is the responsibility of both the man and woman | 1. Strongly Agree<br>2. Agree<br>3. Unsure<br>4. Disagree<br>5. Strongly Disagree<br>88. Refuse to say |
| j17  | A man should know what his partner likes during sex                                   | 1. Strongly Agree<br>2. Agree<br>3. Unsure<br>4. Disagree<br>5. Strongly Disagree<br>88. Refuse to say |

|                    |                                                                                                                         |                                                                                                                                                                                      |
|--------------------|-------------------------------------------------------------------------------------------------------------------------|--------------------------------------------------------------------------------------------------------------------------------------------------------------------------------------|
| j18                | The participation of the father is important in raising children                                                        | <ol style="list-style-type: none"> <li>1. Strongly Agree</li> <li>2. Agree</li> <li>3. Unsure</li> <li>4. Disagree</li> <li>5. Strongly Disagree</li> </ol> <p>88. Refuse to say</p> |
| j19                | It's important for men to have friends to talk about their problems                                                     | <ol style="list-style-type: none"> <li>1. Strongly Agree</li> <li>2. Agree</li> <li>3. Unsure</li> <li>4. Disagree</li> <li>5. Strongly Disagree</li> </ol> <p>88. Refuse to say</p> |
| j20                | A couple should decide together if they want to have children.                                                          | <ol style="list-style-type: none"> <li>1. Strongly Agree</li> <li>2. Agree</li> <li>3. Unsure</li> <li>4. Disagree</li> <li>5. Strongly Disagree</li> </ol> <p>88. Refuse to say</p> |
| Comment            | We have reached the end of the chat. Thank you for your time. Do you have anything else you would like to say?          |                                                                                                                                                                                      |
| End Note           | Thank the participant for their time and give them transport reimbursement, if they did not come for an ART appointment |                                                                                                                                                                                      |
| Comments           | Enumerator comments                                                                                                     |                                                                                                                                                                                      |
| End of the survey! |                                                                                                                         |                                                                                                                                                                                      |

**BASELINE SURVEY**  
**Identifying efficient linkages strategies for HIVST (IDEaL)**  
 Female (Chichewa)

| Question Name                  | Label                                                                                                                                                                                                 | Responses                                                                                                                                                                                                                                               |
|--------------------------------|-------------------------------------------------------------------------------------------------------------------------------------------------------------------------------------------------------|---------------------------------------------------------------------------------------------------------------------------------------------------------------------------------------------------------------------------------------------------------|
| <b>INTRODUCTION SECTION</b>    |                                                                                                                                                                                                       |                                                                                                                                                                                                                                                         |
| interviewer                    | Full Name of Interviewer                                                                                                                                                                              |                                                                                                                                                                                                                                                         |
| Interview date                 | Interview date                                                                                                                                                                                        |                                                                                                                                                                                                                                                         |
| Time start                     | Time survey started                                                                                                                                                                                   |                                                                                                                                                                                                                                                         |
| District                       | District                                                                                                                                                                                              |                                                                                                                                                                                                                                                         |
| Facility                       | Facility                                                                                                                                                                                              |                                                                                                                                                                                                                                                         |
| ID                             | ID                                                                                                                                                                                                    |                                                                                                                                                                                                                                                         |
| <b>SECTION A: DEMOGRAPHICS</b> |                                                                                                                                                                                                       |                                                                                                                                                                                                                                                         |
| Intro Note                     | Zikomo povomera kutenga nawo mbali. Pa nthawi ino ndikufunsani ma funso ochepa okhudza za inu komanso kuti ndinu ndani. Chonde khalani omasuka kuyankha moona. Palibe yankho lokhoza komanso lolakwa. |                                                                                                                                                                                                                                                         |
| a7                             | Ndinu mtundu wanji wa munthu?                                                                                                                                                                         | <ol style="list-style-type: none"> <li>1. Lomwe</li> <li>2. Sena</li> <li>3. Chewa</li> <li>4. Mang'anja/Nyanja</li> <li>5. Ngoni</li> <li>6. Tumbuka</li> <li>7. Tonga</li> <li>8. Yao</li> </ol> <p style="text-align: right;">99. Other, specify</p> |

|      |                                                                                                                             |                                                                                                                                |
|------|-----------------------------------------------------------------------------------------------------------------------------|--------------------------------------------------------------------------------------------------------------------------------|
| a3   | Kodi maphunziro anu mudapita nawo patali bwanji?                                                                            | 1. Pulayimale<br>2. Sekondale<br>3. Koleji                                                                                     |
| a3b  | Ndi kalasi liti munamaliza ya maphunziro anu apamwamba?                                                                     | _____                                                                                                                          |
| a4   | Chonde ganizani za masabata khumi ndi awiri apitawa, mungafotokoze bwanji za ntchito yomwe mumagwira?                       | 1. Ntchito yokhazikika<br>2. Ganyu/bisinesi<br>3. Sindikugwira ntchito                                                         |
| a5   | Kodi pakadali pano muli pa banja?                                                                                           | 1. Pa banja<br>2. Kukhala limodzi ngati banja<br>3. Chibwezi Chokhazikika<br>4. Tinasiyana<br>5. Banja linatha<br><br>99. Zina |
| a6   | Muli ndi ana angati amoyo?                                                                                                  | _____                                                                                                                          |
| a6b  | Mwana wanu wang'ono ali ndi zaka zingati?                                                                                   | _____                                                                                                                          |
| a6bc | Mwana wanu wang'ono ali ndi zaka zingati?                                                                                   | _____                                                                                                                          |
| a4b  | Pakadali pano ana omwe mumakhala nawo ndi angati?                                                                           | _____                                                                                                                          |
| a7   | Pa miyezi khumi ndi iwiri yapitayi mwakhala ndi abwenzi ogonana nawo angati?                                                | _____                                                                                                                          |
| a8   | Mwakhlapo ndi bwenzi logonana kupatula akazi anu? amuna anu osagwiritsa ntchito kondomu mu miyezi khumi ndi awiri yapitayi? | 3. Eya<br>4. Ayi<br>88. Sindikudziwa<br>89. Akana kuyankha                                                                     |
| a8b  | Mwagonanapo ndi munthu osagwiritsa ntchito kondomu mu miyezi khumi ndi awiri yapitayi?                                      | 3. Eya<br>4. Ayi<br>88. Sindikudziwa<br>89. Akana kuyankha                                                                     |

| SECTION B: INCOME QUESTIONS |                                                                                                                                                                                                         |                                                                                                                                      |
|-----------------------------|---------------------------------------------------------------------------------------------------------------------------------------------------------------------------------------------------------|--------------------------------------------------------------------------------------------------------------------------------------|
| Intro Note                  | Pa nthawi ino ndikufunsani za zipangizo zomwe inu komanso apabanja panu alinazo. Mkati mwakucheza kwathu ndikufunsaninso za ndalama zomwe mulinazo komanso komanso zomwe mumachita kuti mupeze ndalama. |                                                                                                                                      |
| b1                          | Chonde ganizirani za miyezi Khumi ndi iwiri yapitayi, mungafotokoze bwanji za ntchito yomwe mumagwira?                                                                                                  | <ol style="list-style-type: none"> <li>1. Ntchito yokhazikika</li> <li>2. Ganyu/bisinesi</li> <li>3. Sindikugwira ntchito</li> </ol> |
| b1b                         | Ganizani za ntchito zonse mwagwira mwezi watha. Mwagwira masiku angati olipidwa?                                                                                                                        | _____                                                                                                                                |
| b2                          | Muli ndi ndalama zilizonse zomwe mukusungira za mtsogolo monga, ku banki, gulu losugira ndalama kapena ndalama zosunga kunyumba?                                                                        | <ol style="list-style-type: none"> <li>2. Eya</li> <li>3. Ayi</li> </ol>                                                             |
| Household Assets            |                                                                                                                                                                                                         |                                                                                                                                      |
| b3                          | Does your household have:<br><i>The respondent said that his/her household doesn't have any of the household assets. Please probe and ensure that this is correct before you proceed.</i>               |                                                                                                                                      |
| b3_1                        | Denga la malata?                                                                                                                                                                                        | <ol style="list-style-type: none"> <li>1. Eya</li> <li>2. Ayi</li> </ol>                                                             |
| b3_2                        | Magetsi ?                                                                                                                                                                                               | <ol style="list-style-type: none"> <li>3. Eya</li> <li>4. Ayi</li> </ol>                                                             |
| b3_3                        | Koloboyi?                                                                                                                                                                                               | <ol style="list-style-type: none"> <li>3. Eya</li> <li>4. Ayi</li> </ol>                                                             |
| b3_4                        | Nyali?                                                                                                                                                                                                  | <ol style="list-style-type: none"> <li>3. Eya</li> <li>4. Ayi</li> </ol>                                                             |
| b3_5                        | Wailesi?                                                                                                                                                                                                | <ol style="list-style-type: none"> <li>3. Eya</li> <li>4. Ayi</li> </ol>                                                             |
| b3_6                        | Kanema?                                                                                                                                                                                                 | <ol style="list-style-type: none"> <li>3. Eya</li> <li>4. Ayi</li> </ol>                                                             |
| b3_7                        | Lamya ya M'manja?                                                                                                                                                                                       | <ol style="list-style-type: none"> <li>3. Eya</li> <li>4. Ayi</li> </ol>                                                             |
| b3_8                        | Kama?                                                                                                                                                                                                   | <ol style="list-style-type: none"> <li>3. Eya</li> </ol>                                                                             |

|              |                                                                                |                              |
|--------------|--------------------------------------------------------------------------------|------------------------------|
|              |                                                                                | 4. Ayi                       |
| b3_9         | Sofa?                                                                          | 3. Eya<br>4. Ayi             |
| b3_10        | Tebulo?                                                                        | 3. Eya<br>4. Ayi             |
| b3_11        | Filiji?                                                                        | 3. Eya<br>4. Ayi             |
| b3_12        | Matilesi?                                                                      | 3. Eya<br>4. Ayi             |
| b3_13        | Mipando                                                                        | 3. Eya<br>4. Ayi             |
| b3_14        | Ng'ombe?                                                                       | 3. Eya<br>4. Ayi             |
| b3_15        | Mbuzi?                                                                         | 3. Eya<br>4. Ayi             |
| b3_16        | Nkhosa?                                                                        | 3. Eya<br>4. Ayi             |
| b3_17        | Nkhumba?                                                                       | 3. Eya<br>4. Ayi             |
| b3_18        | Bulu?                                                                          | 3. Eya<br>4. Ayi             |
| b3_19        | Nkhuku?                                                                        | 3. Eya<br>4. Ayi             |
| b3_20        | Zoweta zina                                                                    | 3. Eya<br>4. Ayi             |
| b4           | Mu masiku makumi atatu apitawa mwamako mowa?                                   | 3. Eya<br>4. Ayi             |
| b4b          | Pa masiku makumi atatu apitawa mwamwa mowa masiku angati?                      | _____                        |
| b4c          | Mwataya ndalama zingati masiku omaliza omwe munapita ku mowa?                  | MWK:                         |
| b4d          | Zonse pamodzi, mwataya ndalama zingati pa mowa mu masiku makumi atatu apitawa? | MWK:                         |
| Relationship |                                                                                |                              |
| Intro Note   | Panthawi ino ndikufunsani za abwezi ogonana nawo?                              |                              |
| f8           | Mwakhala pa ubwenzi ogonana ndi bwenzi lanu kwa nthawi yayitali bwanji?        | Masiku _____<br>Miyezi _____ |

|                        |                                                                                                     |                                                                                                                                                                       |
|------------------------|-----------------------------------------------------------------------------------------------------|-----------------------------------------------------------------------------------------------------------------------------------------------------------------------|
|                        |                                                                                                     | Zaka _____                                                                                                                                                            |
| f9                     | Muli ndi ana ndi bwenzi lanu logonana nalo? Ana angati?                                             | _____                                                                                                                                                                 |
| f10                    | Mumayankhulana mowirikiza bwanji ndi bwenzi lanu pakadali pano?                                     | 8. Tsiku ndi tsiku<br>9. Masiku angapo pasabata<br>10. Kamodzi pa sabata<br>11. Kangapo pa mwezi<br>12. Kamodzi pa mwezi<br>13. Kosakwana mwezi<br>14. Sitiyankhulani |
| f10b                   | Pa mwezi amalandila ndalama zambiri ndi ndani? Inu kapena bwenzi lanu?                              | 5. Ine<br>6. Bwenzi langa<br>7. Timalandira ndalama zofanana<br>8. Sindikudziwa                                                                                       |
| <b>Decision Making</b> |                                                                                                     |                                                                                                                                                                       |
| Intro Note             | Pa nthawi ino ndikufunsani za momwe mumapangira maganizo ndi bwenzi lanu                            |                                                                                                                                                                       |
| f11                    | Nthawi zambiri ndi ndani amene amapanga chiganizo cha momwe ndalama mumapeze zigwiritsidwe ntchito? | 6. Ine<br>7. Timagwirizana<br>8. Nthawi zambiri bwenzi langa<br>9. Munthu wina<br>10. Sindipeza ndalama<br>89. Sindikufuna kuyankha                                   |
| f11b                   | (Ngati yankho ndi 4) Amapanga chiganizo ndi ndani?                                                  | _____                                                                                                                                                                 |
| f12                    | Amapanga chiganizo cha momwe ndalama za bwenzi lanu zigwiritsidwe ntchito ndi ndani?                | 6. Ine<br>7. Timagwirizana<br>8. Nthawi zambiri bwenzi langa<br>9. Munthu wina<br>10. Sindipeza ndalama<br>89. Sindikufuna kuyankha                                   |
| f12b                   | (Ngati yankho ndi 4)                                                                                | _____                                                                                                                                                                 |

|      |                                                                                                               |                                                                                                                                     |
|------|---------------------------------------------------------------------------------------------------------------|-------------------------------------------------------------------------------------------------------------------------------------|
| f13  | Nthawi zambiri amapanga chiganizo chokhudza thandizo la zaumoyo wanu ndi ndani?                               | 6. Ine<br>7. Timagwirizana<br>8. Nthawi zambiri bwenzi langa<br>9. Munthu wina<br>10. Sindipeza ndalama<br>89. Sindikufuna kuyankha |
| f13b | (Ngati yankho ndi 4) Amapanga chiganizo ndi ndani?                                                            | _____                                                                                                                               |
| f14  | Nthawi zambiri amapanga chiganizo cha thandizo la zaumoyo la mwana yemwe muli naye ndi bwenzi lanu ndi ndani? | 6. Ine<br>7. Mogwirizana<br>8. Nthawi zambiri bwenzi langa<br>9. Munthu wina<br>10. Ndilibe mwana<br><br>88. Sindikufuna kuyankha   |
| f14b | (if above question=4 ) Who decides?                                                                           | _____                                                                                                                               |
| f15  | Nthawi zambiri amapanga chiganizo chokhudza thandizo la zaumoyo la bwenzi lanu ndi ndani?                     | 1. Ine<br>2. Mogwirizana<br>3. Nthawi zambiri bwenzi langa<br>4. Munthu wina<br>5. Ndilibe ana<br>88.Sindikufuna kuyankha           |
| f15b | (Ngati yankho ndi 4) Amapanga chiganizo ndi ndani?                                                            | _____                                                                                                                               |
| f16  | Kodi ndi ndani amene amapanga ziganizo zogula katundu mkulumkulu wapa khomo panu?                             | 1. Ine<br>2. Mogwirizana<br>3. Nthawi zambiri bwenzi langa<br>4. Munthu wina<br>5. Ndilibe ana<br>88.Sindikufuna kuyankha           |
| f16b | (Ngati yankho ndi 4) Amapanga                                                                                 |                                                                                                                                     |



|          |                                                                                                                                                                                                                                                                                                                                                                                                                                                                                                                                                                                                                                                                                                                  |  |
|----------|------------------------------------------------------------------------------------------------------------------------------------------------------------------------------------------------------------------------------------------------------------------------------------------------------------------------------------------------------------------------------------------------------------------------------------------------------------------------------------------------------------------------------------------------------------------------------------------------------------------------------------------------------------------------------------------------------------------|--|
|          | chiganizo ndani?                                                                                                                                                                                                                                                                                                                                                                                                                                                                                                                                                                                                                                                                                                 |  |
| Note     | Ndikufuna ndikufunsemi zokhudzana za (Kuthekela/mwayi) kuti zinthu zina zichitike. Muli nyemba mu kapu. Ndikufunsemi kuti musankhe zina mwa nyemba ndipo muyike mu mbale. Mulingo wa nyemba omwe muyike mu mbale udzafanizira kuti chinachake chichitika. Nyemba imodzi ikusonyeza kuti mwayi ndiochepa kuti chinachake chichitika. Ngati simuika nyemba mm'bale ndekuti mukutsimikiza kuti palibe mwayi oti chinachake chichitika                                                                                                                                                                                                                                                                               |  |
| note2    | Ngati muyike nyemba zowonjezera mu mbale, zikutanthauza kuti mwayi oti chinachake chichitika uchuluka, mwachitsanzo ngati muyika nyemba imodzi kapena ziwiri mwayi oti chinachake chichitika. Ngakhale pali mwayi ochepa koma chinachake chichitika. Ngati muyike nyemba nkhumu zikutanthauza kuti pali mwayi ofanana oti chinachake chichika kapena ayi. Ngati muyike nyemba zisanu ndi imodzi zikutanthauza kuti mwayi woti chinachake chichitika uli ochulukilapo kuposa mwayi oti chinachake sichichitika. Ngati muyike nyemba zonse khumi ndekuti muli ndi chikhulupiliro chonse kuti chinachake chichitikadi pavute pasavute. Palibe yankho lokhonza kapena lolakwa ndikungofuna kudziwa zomwe mukuganiza. |  |
| note3    | Ofunsa: Pelekani yankho lanu pa funso lililonse nambala ya nyemba zomwe lili m'bale. Pakutha pa funso lililonse, bwezeletsani nyemba pa tebulo.                                                                                                                                                                                                                                                                                                                                                                                                                                                                                                                                                                  |  |
| Practice |                                                                                                                                                                                                                                                                                                                                                                                                                                                                                                                                                                                                                                                                                                                  |  |

|          |                                                                                                                                                                                                                                           |                  |
|----------|-------------------------------------------------------------------------------------------------------------------------------------------------------------------------------------------------------------------------------------------|------------------|
| pr1      | Sankhani mulingo wa nyemba omwe ukhale ndi kuthekela kumene mukuganiza kuti:                                                                                                                                                              | _____            |
| pr1b     | Mupita ku msika mosachepera kamodzi m' masiku awiri akudzawa                                                                                                                                                                              | _____            |
| pr1c     | Mupita ku msika mosachepera kamodzi m' masabata awiri akudzawa.                                                                                                                                                                           | _____            |
| Practice |                                                                                                                                                                                                                                           |                  |
| pr2      | Ofunsa: kodi oyankha anawonjezera nyamba pakati pa pr1b ndi pr1c                                                                                                                                                                          | 3. Eya<br>1. Ayi |
| pr3      | Kumbukurani kuti pamene nthawi ikupita muzipeza mpata wambiri opita kumsika. Choncho, munayenela kuti mwaika nyemba zambiri m' bale<br><br>Kodi mukuganiza kuti kumsika mupita mosachepela kamodzi bwanji mu nyengo ya ma sabata awiriwa? | _____            |
| f17      | Sankhani mlingo wa nyemba umene ufanizile kaganidwe kanu:                                                                                                                                                                                 |                  |

|                                           |                                                                                                                                                                 |                                                                                                                                      |
|-------------------------------------------|-----------------------------------------------------------------------------------------------------------------------------------------------------------------|--------------------------------------------------------------------------------------------------------------------------------------|
| f17a                                      | Mudzakhalabe pabanja ndi bwenzi lanu m'chaka chimodzi chikubwerachi                                                                                             | _____                                                                                                                                |
| f17b                                      | Bwenzi lanu lidzapezeka ndi matenda a HIV m'miyezi khumi ndi iwiri ikubwerayi                                                                                   | _____                                                                                                                                |
| f17c                                      | Bwenzi lanu lidzayamba kumwa ma ARV m'miyezi itatu ikubwerayi                                                                                                   | _____                                                                                                                                |
| f17d                                      | Bwenzi lanu lidzaulula kuti inuyo muli ndi kachilombo ka HIV kwa anzanu apamtima/abale anu m'miyezi itatu ikubwerayi                                            | _____                                                                                                                                |
| <b>SELF REPORTED HEALTH AND HAPPINESS</b> |                                                                                                                                                                 |                                                                                                                                      |
| Intro Note                                | Pa nthawi ino ndikufuna ndikambe nanu zokhudza umoyo ndi chisangalalo chanu.                                                                                    |                                                                                                                                      |
| e1                                        | Ndili ndi chidwi ndi mukudziwa za umoyo ndi kukhutitsidwa kwanu. Kodi muli okhutitsidwa bwanji ndi moyo wanu, pakutengela zonse.                                | 6. Okhutitsidwa kwamburi<br>7. Okhutitsidwa pang'ono<br>8. Pakatikati<br>9. Okhutitsidwa pang'ono<br>10. Osakhutitsidwa olo pang'ono |
| e2                                        | Kodi mukuona ngati muli okhutitsidwa mofanana kapena osakhutitsidwa pang'ono mosaposele anthu ena a muna kapena akazi a msinkhu wanu ndi opezeka m'mudzi mwanu? | 4. Okhutitsidwa kwambiri<br>5. Okhutitsidwa<br>6. Okhutitsidwa pang'ono                                                              |
| e3                                        | Kutengela zonse, Kodi munganene kuti umoyo wanu tsopano uli bwino kwambiri, ulibwino, sulibwino, suli bwino olo pang'ono                                        | 5. Bwino kwambiri<br>6. Bwino<br>7. Silibwino<br>8. Silibwino olo pang'ono                                                           |
| e4                                        | Kodi mungazifananizile bwanji za thanzi lanu ndi la anthu ena a msikhu ofanana ndi wanu, amuna kapena                                                           | 4. A thanzi kwambiri<br>5. A thanzi<br>6. Nthanzi lochepekela                                                                        |

|                            |                                                                                                                                                  |                                                                                                                            |
|----------------------------|--------------------------------------------------------------------------------------------------------------------------------------------------|----------------------------------------------------------------------------------------------------------------------------|
|                            | akazi a m'mudzi mwanu.                                                                                                                           |                                                                                                                            |
| e5                         | Kodi mwezi wathawu, ndi masiku angati omwe munadwara kwambiri ofika kukulepheretsani kugwira nthito/kupita ku sukulu/kugwira ntchito za pa khomo | _____                                                                                                                      |
| Happiness                  |                                                                                                                                                  |                                                                                                                            |
| e6                         | Kodi ziganizo izi ndi zowona bwanji kwa inu?                                                                                                     |                                                                                                                            |
| e6_1                       | Ndinali ndi nkhwawa                                                                                                                              | 5. Ndikugwirizana nazo kwambiri<br>6. Ndikugwirizana nazo<br>7. Sindikugwirizana nazo<br>8. Sindikugwirizana nazo kwambiri |
| e6_2                       | Ndimanva ngati moyo wafika                                                                                                                       | 5. Ndikugwirizana nazo kwambiri<br>6. Ndikugwirizana nazo<br>7. Sindikugwirizana nazo<br>8. Sindikugwirizana nazo kwambiri |
| e6_3                       | Ndimanva kukhutitsidwa                                                                                                                           | 5. Ndikugwirizana nazo kwambiri<br>6. Ndikugwirizana nazo<br>7. Sindikugwirizana nazo<br>8. Sindikugwirizana nazo kwambiri |
| e6_4                       | Ndimanva kusalidwa                                                                                                                               | 5. Ndikugwirizana nazo kwambiri<br>6. Ndikugwirizana nazo<br>7. Sindikugwirizana nazo<br>8. Sindikugwirizana nazo kwambiri |
| GENDER EQUITABLE MEN SCALE |                                                                                                                                                  |                                                                                                                            |
| Note                       | Chonde ndiuzeni ngati mukugwirizana nazo kwambiri, mukugwirizana nazo, simukugwirizana nazo, simukugwirizana nazo olo pang'ono ziganizo izi:     |                                                                                                                            |

|    |                                                                          |                                                                                                                                                                                      |
|----|--------------------------------------------------------------------------|--------------------------------------------------------------------------------------------------------------------------------------------------------------------------------------|
| j1 | Udindo ofunikila wa mzimayi ndi kusamala khomo lake ndi kuphika.         | 6. Ndikugwirizana nazo kwambiri<br>7. Ndikugwirizana nazo<br>8. Sindikukhulupilira<br>9. Sindikugwirizana nazo<br>10. Sindikugwirizana nazo olo pang'ono<br>89. Sindikufuna kuyankha |
| j2 | Abambo amafuna kugonana kuposa amayi                                     | 6. Ndikugwirizana nazo kwambiri<br>7. Ndikugwirizana nazo<br>8. Sindikukhulupilira<br>9. Sindikugwirizana nazo<br>10. Sindikugwirizana nazo olo pang'ono<br>88. Sindikufuna kuyankha |
| j3 | Azibambo sakonda kukambirana za kugonana amangochita                     | 6. Ndikugwirizana nazo kwambiri<br>7. Ndikugwirizana nazo<br>8. Sindikukhulupilira<br>9. Sindikugwirizana nazo<br>10. Sindikugwirizana nazo olo pang'ono<br>88. Sindikufuna kuyankha |
| j4 | Nthawi zina mzimayi amayenela kumenyedwa.                                | 6. Ndikugwirizana nazo kwambiri<br>7. Ndikugwirizana nazo<br>8. Sindikukhulupilira<br>9. Sindikugwirizana nazo<br>10. Sindikugwirizana nazo olo pang'ono<br>88. Sindikufuna kuyankha |
| j5 | Kusinta matewela, kusambitsa mwana, kudyetsa mwana ndi udindo wa mzimayi | 6. Ndikugwirizana nazo kwambiri<br>7. Ndikugwirizana nazo<br>8. Sindikukhulupilira<br>9. Sindikugwirizana nazo<br>10. Sindikugwirizana nazo olo pang'ono<br>88. Sindikufuna kuyankha |
| j6 | Ndi udindi wa mzimayi kupewa                                             | 6. Ndikugwirizana nazo kwambiri                                                                                                                                                      |

|      |                                                                             |                                                                                                                                                                                          |
|------|-----------------------------------------------------------------------------|------------------------------------------------------------------------------------------------------------------------------------------------------------------------------------------|
|      | kutenga mimba.                                                              | 7. Ndikugwirizana nazo<br>8. Sindikukhulupilira<br>9. Sindikugwirizana nazo<br>10. Sindikugwirizana nazo olo pang'ono<br><br>88. Sindikufuna kuyankha                                    |
| j7   | Mzibambo ayenela kukhala ndi chiganizo chomaliza cha mnyumba mwake.         | 6. Ndikugwirizana nazo kwambiri<br>7. Ndikugwirizana nazo<br>8. Sindikukhulupilira<br>9. Sindikugwirizana nazo<br>10. Sindikugwirizana nazo olo pang'ono<br><br>88. Sindikufuna kuyankha |
| j8   | Azibambo amakhala okonzeka ku gonana                                        | 6. Ndikugwirizana nazo kwambiri<br>7. Ndikugwirizana nazo<br>8. Sindikukhulupilira<br>9. Sindikugwirizana nazo<br>10. Sindikugwirizana nazo olo pang'ono<br><br>Sindikufuna kuyankha     |
| j9   | Mzimayi akuyenela kulekelela nkhaza kuti asunge banja lake.                 | 6. Ndikugwirizana nazo kwambiri<br>7. Ndikugwirizana nazo<br>8. Sindikukhulupilira<br>9. Sindikugwirizana nazo<br>10. Sindikugwirizana nazo olo pang'ono<br><br>Sindikufuna kuyankha     |
| j10a | Ndikhoza kukwiya akaza anga atati andiuze kuti ndigwiritse ntchito kondumu. | 6. Ndikugwirizana nazo kwambiri<br>7. Ndikugwirizana nazo<br>8. Sindikukhulupilira<br>9. Sindikugwirizana nazo<br>10. Sindikugwirizana nazo olo pang'ono<br><br>88. Sindikufuna kuyankha |
| j10b | Azibambo akhoza kukwiya akazi awo atawauza kuti agwiritse ntchito           | 6. Ndikugwirizana nazo kwambiri                                                                                                                                                          |

|      |                                                                                               |                                                                                                                                                                                          |
|------|-----------------------------------------------------------------------------------------------|------------------------------------------------------------------------------------------------------------------------------------------------------------------------------------------|
|      | kondomu                                                                                       | 7. Ndikugwirizana nazo<br>8. Sindikukhulupilira<br>9. Sindikugwirizana nazo<br>10. Sindikugwirizana nazo olo pang'ono<br><br>88. Sindikufuna kuyankha                                    |
| j11  | Mzimayi komanso nzibambo agwirizane limodzi kuti agwiritse ntchito njira yanji yakulela       | 6. Ndikugwirizana nazo kwambiri<br>7. Ndikugwirizana nazo<br>8. Sindikukhulupilira<br>9. Sindikugwirizana nazo<br>10. Sindikugwirizana nazo olo pang'ono<br><br>88. Sindikufuna kuyankha |
| j12  | Sindingakhale ndi nzanga wopanga zamathanyula                                                 | 6. Ndikugwirizana nazo kwambiri<br>7. Ndikugwirizana nazo<br>8. Sindikukhulupilira<br>9. Sindikugwirizana nazo<br>10. Sindikugwirizana nazo olo pang'ono<br><br>88. Sindikufuna kuyankha |
| j13a | Ngati munthu angandinyoze, ndiziteteza pogwiritsa ntchito mphanvu, ngati ndikufunika kutero.  | 6. Ndikugwirizana nazo kwambiri<br>7. Ndikugwirizana nazo<br>8. Sindikukhulupilira<br>9. Sindikugwirizana nazo<br>10. Sindikugwirizana nazo olo pang'ono<br><br>88. Sindikufuna kuyankha |
| j13b | Ngati munthu anganyoze mzibambo, aziteteze pogwiritsa ntchito mphanvu ngati akufunika kutelo. | 6. Ndikugwirizana nazo kwambiri<br>7. Ndikugwirizana nazo<br>8. Sindikukhulupilira<br>9. Sindikugwirizana nazo<br>10. Sindikugwirizana nazo olo pang'ono<br><br>Sindikufuna kuyankha     |
| j14  | Kuti ukhale mzibambo ukufunika kukhala ovuta.                                                 | 6. Ndikugwirizana nazo kwambiri<br>7. Ndikugwirizana nazo<br>8. Sindikukhulupilira                                                                                                       |

|     |                                                                                     |                                                                                                                                                                                                     |
|-----|-------------------------------------------------------------------------------------|-----------------------------------------------------------------------------------------------------------------------------------------------------------------------------------------------------|
|     |                                                                                     | <p>9. Sindikugwirizana nazo<br/>10. Sindikugwirizana nazo olo pang'ono<br/>Sindikufuna kuyankha<br/>Sindikugwirizana nazo kwambiri</p> <p>88. Refuse to say<br/>Sindikufuna kuyankha</p>            |
| j15 | Azibambo akuyenela kunva manyazi ngati akukanika kutota                             | <p>6. Ndikugwirizana nazo kwambiri<br/>7. Ndikugwirizana nazo<br/>8. Sindikukhulupilira<br/>9. Sindikugwirizana nazo<br/>10. Sindikugwirizana nazo olo pang'ono</p> <p>88. Sindikufuna kuyankha</p> |
| j16 | Ngati mzibambo wapeleka mimba kwa mzimayi, mwanayo ndi udindo wa anthu onse a wiri. | <p>6. Ndikugwirizana nazo kwambiri<br/>7. Ndikugwirizana nazo<br/>8. Sindikukhulupilira<br/>9. Sindikugwirizana nazo<br/>10. Sindikugwirizana nazo olo pang'ono</p> <p>88. Sindikufuna kuyankha</p> |
| j17 | Nzibambo akuyenela kudziwa zomwe bwenzi lake limakonda pogonana                     | <p>6. Ndikugwirizana nazo kwambiri<br/>7. Ndikugwirizana nazo<br/>8. Sindikukhulupilira<br/>9. Sindikugwirizana nazo<br/>10. Sindikugwirizana nazo olo pang'ono</p> <p>88. Sindikufuna kuyankha</p> |
| j18 | Kutenga nawo mbali kwa a bambo ndi kofunika polela mwana                            | <p>6. Ndikugwirizana nazo kwambiri<br/>7. Ndikugwirizana nazo<br/>8. Sindikukhulupilira<br/>9. Sindikugwirizana nazo<br/>10. Sindikugwirizana nazo olo pang'ono</p> <p>88. Sindikufuna kuyankha</p> |



|                    |                                                                                                                         |                                                                                                                                                                                          |
|--------------------|-------------------------------------------------------------------------------------------------------------------------|------------------------------------------------------------------------------------------------------------------------------------------------------------------------------------------|
| j19                | Ndi zofunika kuti abambo azikhala ndi anzawo okambilana nawo mavuto awo.                                                | 6. Ndikugwirizana nazo kwambiri<br>7. Ndikugwirizana nazo<br>8. Sindikukhulupilira<br>9. Sindikugwirizana nazo<br>10. Sindikugwirizana nazo olo pang'ono<br><br>88. Sindikufuna kuyankha |
| j20                | Banja lizigwirizana limodzi ngati likufuna kukhala ndi mwana                                                            | 6. Ndikugwirizana nazo kwambiri<br>7. Ndikugwirizana nazo<br>8. Sindikukhulupilira<br>9. Sindikugwirizana nazo<br>10. Sindikugwirizana nazo olo pang'ono<br><br>88. Sindikufuna kuyankha |
| Comment            | Tafika pamapeto a kucheza kwathu. Zikomo chifukwa cha nthawi yanu. Pali chili chonse mukufuna kuwonjezera?              |                                                                                                                                                                                          |
| End Note           | Thank the participant for their time and give them transport reimbursement, if they did not come for an ART appointment |                                                                                                                                                                                          |
| Comments           | Enumerator comments                                                                                                     |                                                                                                                                                                                          |
| End of the survey! |                                                                                                                         |                                                                                                                                                                                          |

1  
2  
3 **14.7. APPENDIX G: Follow-up Survey - Male**  
4  
5

6  
7 **FOLLOW-UP SURVEY**  
8 **Identifying efficient linkages strategies for HIVST (IDEaL)**  
9 **Male**  
10  
11

12  
13  
14 **Complete this form for men who enrolled in the study 4-months ago**

15 **Date of Interview:** \_\_\_\_\_

16 **Site Code:** \_\_\_\_\_

17 **Full Name of Interviewer:** \_\_\_\_\_

18 **Participant Study ID#:** \_\_\_\_\_  
19  
20  
21

22

| #    | Question                                                                                                                      | Response                                                                                                                                                                                                                                                                                                                                                                            |
|------|-------------------------------------------------------------------------------------------------------------------------------|-------------------------------------------------------------------------------------------------------------------------------------------------------------------------------------------------------------------------------------------------------------------------------------------------------------------------------------------------------------------------------------|
| c1a  | Please think about your primary partner in the last 4 months.<br><br>Has your relationship changed in the last 4 months? How? | <input type="checkbox"/> Nothing changed (1)<br><input type="checkbox"/> Married (2)<br><input type="checkbox"/> Steady Girlfriend (3)<br><input type="checkbox"/> Moved out of the house (4)<br><input type="checkbox"/> Became an infrequent partner (5)<br><input type="checkbox"/> Separated (6)<br><input type="checkbox"/> Divorced (7)<br><input type="checkbox"/> Other (8) |
| c4a  | Have you disclosed your HIV status to this partner?                                                                           | <input type="checkbox"/> Yes (1)<br><input type="checkbox"/> No (0)                                                                                                                                                                                                                                                                                                                 |
| c5a  | Have you had any new children with this partner since we last spoke?                                                          | <input type="checkbox"/> Yes (1)<br><input type="checkbox"/> No (0)                                                                                                                                                                                                                                                                                                                 |
| c18a | Have you started ART in the past 4months?                                                                                     | <input type="checkbox"/> Yes (1)<br><input type="checkbox"/> No (0)<br><input type="checkbox"/> No, but I plan to link                                                                                                                                                                                                                                                              |

23  
24  
25  
26  
27  
28  
29  
30  
31  
32  
33  
34  
35  
36  
37  
38  
39  
40  
41  
42  
43  
44  
45  
46  
47  
48  
49  
50  
51  
52  
53  
54  
55  
56  
57  
58  
59  
60

|                                |                                                                                                                                                 |                                                                                                                         |
|--------------------------------|-------------------------------------------------------------------------------------------------------------------------------------------------|-------------------------------------------------------------------------------------------------------------------------|
| c18b                           | IF YES: When did you start ART?                                                                                                                 | <hr/> Day/Month/Year                                                                                                    |
| <b>Unintended Consequences</b> |                                                                                                                                                 |                                                                                                                         |
| c19a                           | Were unwantedly pressured to initiate ART?                                                                                                      | <input type="checkbox"/> Yes (1)<br><input type="checkbox"/> No (0)                                                     |
| c20a                           | After enrolling in the study, did anyone find out your HIV status against your will (unwanted disclosure)?                                      | <input type="checkbox"/> Yes (1)<br><input type="checkbox"/> No (0)                                                     |
| C20b                           | After enrolling in the study, did anyone find out your partners' HIV status against her will (unwanted disclosure)?                             | <input type="checkbox"/> Yes (1)<br><input type="checkbox"/> No (0)                                                     |
| c21a                           | After enrolling in the study, did your partner....<br><br>Threaten to hurt or harm you or someone you cared about.                              | <input type="checkbox"/> Yes (1)<br><input type="checkbox"/> No (0)<br><input type="checkbox"/> Refused to respond (99) |
| c22a                           | Insulted you or made you feel bad about yourself.                                                                                               | <input type="checkbox"/> Yes (1)<br><input type="checkbox"/> No (0)<br><input type="checkbox"/> Refused to respond (99) |
| c23a                           | Hit, slapped, kicked or did anything else meant to physically hurt you.                                                                         | <input type="checkbox"/> Yes (1)<br><input type="checkbox"/> No (0)<br><input type="checkbox"/> Refused to respond (99) |
| c21a                           | After enrolling in the study, did you ever do the following to your partner....<br><br>Threaten to hurt or harm her or someone she cared about. | <input type="checkbox"/> Yes (1)<br><input type="checkbox"/> No (0)<br><input type="checkbox"/> Refused to respond (99) |

|      |                                                                                                                                                                                                               |                                                                                                                                                                                                                                                                                                     |
|------|---------------------------------------------------------------------------------------------------------------------------------------------------------------------------------------------------------------|-----------------------------------------------------------------------------------------------------------------------------------------------------------------------------------------------------------------------------------------------------------------------------------------------------|
|      |                                                                                                                                                                                                               |                                                                                                                                                                                                                                                                                                     |
| c22a | Insulted her or made her feel bad about herself.                                                                                                                                                              | <input type="checkbox"/> Yes (1)<br><input type="checkbox"/> No (0)<br><input type="checkbox"/> Refused to respond (99)                                                                                                                                                                             |
| c23a | Hit, slapped, kicked or did anything else meant to physically hurt her.                                                                                                                                       | <input type="checkbox"/> Yes (1)<br><input type="checkbox"/> No (0)<br><input type="checkbox"/> Refused to respond (99)                                                                                                                                                                             |
| c24  | Slept with another woman                                                                                                                                                                                      | <input type="checkbox"/> Yes (1)<br><input type="checkbox"/> No (0)<br><input type="checkbox"/> Refused to respond (99)                                                                                                                                                                             |
| c25a | <p><i>Now, I am going to ask you a series of questions about who makes within this relationship. Please think about the last 4 months</i></p> <p>Who usually decides how the money you earn will be used?</p> | <input type="checkbox"/> Yourself (respondent)<br><input type="checkbox"/> Jointly (This partner and you together)<br><input type="checkbox"/> Mainly this partner<br><input type="checkbox"/> Someone else<br><input type="checkbox"/> Do not earn money<br><input type="checkbox"/> Refuse to say |
| c26a | Who usually decides how your partner's earnings will be used?                                                                                                                                                 | <input type="checkbox"/> Yourself (respondent)<br><input type="checkbox"/> Jointly (This partner and you together)<br><input type="checkbox"/> Mainly this partner<br><input type="checkbox"/> Someone else<br><input type="checkbox"/> Refuse to say                                               |

|      |                                                             |                                                                                                                                                                                                                                                       |
|------|-------------------------------------------------------------|-------------------------------------------------------------------------------------------------------------------------------------------------------------------------------------------------------------------------------------------------------|
| c27a | Who usually makes decisions about health care for yourself? | <input type="checkbox"/> Yourself (respondent)<br><input type="checkbox"/> Jointly (This partner and you together)<br><input type="checkbox"/> Mainly this partner<br><input type="checkbox"/> Someone else<br><input type="checkbox"/> Refuse to say |
|------|-------------------------------------------------------------|-------------------------------------------------------------------------------------------------------------------------------------------------------------------------------------------------------------------------------------------------------|

| D. Additional Questions |                                                                                            |                                                                     |
|-------------------------|--------------------------------------------------------------------------------------------|---------------------------------------------------------------------|
| #                       | Question                                                                                   | Response                                                            |
| d1                      | Would you recommend the ART intervention you were part of to other male friends or family? | <input type="checkbox"/> Yes (1)<br><input type="checkbox"/> No (0) |
| d2                      | Are you happy that you participated in the ART intervention?                               | <input type="checkbox"/> Yes (1)<br><input type="checkbox"/> No (0) |

Thank the participant for their time and end the survey

**BASELINE SURVEY**  
**Identifying efficient linkages strategies for HIVST (IDEaL)**  
 Male (Chichewa)

**Complete this form for men who enrolled in the study 4-months ago**

**Date of Interview:** \_\_\_\_\_

**Site Code:** \_\_\_\_\_

**Full Name of Interviewer:** \_\_\_\_\_

**Participant Study ID#:** \_\_\_\_\_

| #    | Question                                                                                                                                                                          | Response                                                                                                                                                                                                                                                                                                                                                                                          |
|------|-----------------------------------------------------------------------------------------------------------------------------------------------------------------------------------|---------------------------------------------------------------------------------------------------------------------------------------------------------------------------------------------------------------------------------------------------------------------------------------------------------------------------------------------------------------------------------------------------|
| c1a  | <p>Taganizani za bwenzi lanu logonana nalo lomwe lakhala lodalilika kwa miyesi folo yapitayi.</p> <p>Kodi ubwenzi wanu wasintha munjira ina iliyonse mu miyezi folo yapitayi?</p> | <input type="checkbox"/> Palibe chasintha (1)<br><input type="checkbox"/> Married (2)<br><input type="checkbox"/> Chibwenzi chokhazikika (3)<br><input type="checkbox"/> Chibwenzi Chinachoka pakhomo (4)<br><input type="checkbox"/> Chibwenzi cha apo ndi apo (5)<br><input type="checkbox"/> Separated (6)<br><input type="checkbox"/> Banja linatha (7)<br><input type="checkbox"/> Other (8) |
| c4a  | Kodi munawauza abwenzi anuwa za mmene mulili mnthupi mwanu ku mbali ya HIV?                                                                                                       | <input type="checkbox"/> Eya(1)<br><input type="checkbox"/> Ayi(0)                                                                                                                                                                                                                                                                                                                                |
| c5a  | Kodi mwakhala ndi ana ndi abwenzi anuwa kuchokera ulendo watha tinayankhulana?                                                                                                    | <input type="checkbox"/> Eya(1)<br><input type="checkbox"/> Ayi(0)                                                                                                                                                                                                                                                                                                                                |
| c18a | Kodi munayamba kumwa mankhwala a ma ARV mu miyezi folo yapitayi?                                                                                                                  | <input type="checkbox"/> Eya(1)<br><input type="checkbox"/> Ayi(2)<br><input type="checkbox"/> Ayi, ndikulingalira zoyamba (3)                                                                                                                                                                                                                                                                    |

|                                |                                                                                                                                                                |                                                                                                                        |
|--------------------------------|----------------------------------------------------------------------------------------------------------------------------------------------------------------|------------------------------------------------------------------------------------------------------------------------|
| c18b                           | Ngati eya: Munayamba liti mankwala a ma ARV?                                                                                                                   | <hr/> Tsiku/Mwezi/Chaka                                                                                                |
| <b>Unintended Consequences</b> |                                                                                                                                                                |                                                                                                                        |
| c19a                           | Munayamba kumwa mankhwala a ma ARV mokakamizidwa?                                                                                                              | <input type="checkbox"/> Eya(1)<br><input type="checkbox"/> Ayi(0)                                                     |
| c20a                           | Chilowereni mu study, alipo omwe anadziwa za m'mene mulili mnthupi mwanu kumbari ya HIV inu musakufuna? (Kuwulula za HIV mosafuna)                             | <input type="checkbox"/> Eya(1)<br><input type="checkbox"/> Ayi(0)                                                     |
| C20b                           | Chilowereni mu study, alipo omwe anadziwa za m'mene mulili mnthupi mwa bwenzi lanu kumbari ya HIV eni asakufuna? (Kuwulula za HIV mosafuna)                    | <input type="checkbox"/> Eya(1)<br><input type="checkbox"/> Ayi(0)                                                     |
| c21a                           | Chilowereni mu study, kodi bwenzi lanu.....<br><br>Linaospyeza kuvulaza inu kapena wina aliyense amane mumamukonda?                                            | <input type="checkbox"/> Eya(1)<br><input type="checkbox"/> Ayi(0)<br><input type="checkbox"/> Refused to respond (99) |
| c22a                           | Linakunyoza kapena kukunyogodolani                                                                                                                             | <input type="checkbox"/> Eya(1)<br><input type="checkbox"/> Ayi(0)<br><input type="checkbox"/> Refused to respond (99) |
| c23a                           | Anakumenyani ndikukupwetekani.                                                                                                                                 | <input type="checkbox"/> Eya(1)<br><input type="checkbox"/> Ayi(0)<br><input type="checkbox"/> Refused to respond (99) |
| c21a                           | Chilowereni mu study kodi munayamba mwapangapo zotsatirazi kwa bwenzi anu....<br><br>Kuosyeza kuti muvulaza bwenzi lanu kapena wina aliyense yemwe amamukonda. | <input type="checkbox"/> Eya(1)<br><input type="checkbox"/> Ayi(0)<br><input type="checkbox"/> Refused to respond (99) |

|      |                                                                                                                                                                         |                                                                                                                                                                                                                                                                 |
|------|-------------------------------------------------------------------------------------------------------------------------------------------------------------------------|-----------------------------------------------------------------------------------------------------------------------------------------------------------------------------------------------------------------------------------------------------------------|
| c22a | Kunyoza kapenanso kumupangitsa kuti azizikayikila.                                                                                                                      | <input type="checkbox"/> Eya(1)<br><input type="checkbox"/> Ayi(0)<br><input type="checkbox"/> Refused to respond (99)                                                                                                                                          |
| c23a | Kumumenya ndikumupweteka.                                                                                                                                               | <input type="checkbox"/> Eya(1)<br><input type="checkbox"/> Ayi(0)<br><input type="checkbox"/> Refused to respond (99)                                                                                                                                          |
| c24  | Kuchita mchitidwe ogonana ndi mzimayi wina                                                                                                                              | <input type="checkbox"/> Eya(1)<br><input type="checkbox"/> Ayi(0)<br><input type="checkbox"/> Refused to respond (99)                                                                                                                                          |
| c25a | <p>Tsopano ndikufunsani mafunso okhuzana ndi omwe amalamula pakhomo panu.</p> <p>Kodi amalamula za mmene ndalama zomwe mwapeza zitagwilitsidwile ntchito ndi ndani?</p> | <input type="checkbox"/> Amene akuyankha<br><input type="checkbox"/> Mogwirizana<br><input type="checkbox"/> Nthawi zambiri bwenzi<br><input type="checkbox"/> Munthu wina<br><input type="checkbox"/> Sapeza ndalama<br><input type="checkbox"/> Refuse to say |
| c26a | Kodi amalamulila za mmene ndalama za abwenzu anu zingagwilitsidwile ntchito ndi ndani?                                                                                  | <input type="checkbox"/> Amene akuyankha<br><input type="checkbox"/> Mogwirizana<br><input type="checkbox"/> Nthawi zambiri bwenzi<br><input type="checkbox"/> Munthu wina<br><input type="checkbox"/> Refuse to say                                            |
| c27a | Kodi amene amakhala ndi ulamulilo pa chisamalilo cha moyo wanu ndi ndani?                                                                                               | <input type="checkbox"/> Amene akuyankha<br><input type="checkbox"/> Mogwirizana<br><input type="checkbox"/> Nthawi zambiri bwenzi<br><input type="checkbox"/> Munthu wina<br><input type="checkbox"/> Refuse to say                                            |



| Additional Questions |                                                                                                                   |                                                                    |
|----------------------|-------------------------------------------------------------------------------------------------------------------|--------------------------------------------------------------------|
| d1                   | Kodi mungalimbikitse anzanu ena achizibambo kapena apabanja panu kutenga nawo mbali mu ART intervention munaliyi? | <input type="checkbox"/> Eya(1)<br><input type="checkbox"/> Ayi(0) |
| d2                   | Kodi muli okondwa kuti munatenga nawo mbali mu ART intervention?                                                  | <input type="checkbox"/> Eya(1)<br><input type="checkbox"/> Ayi(0) |

1  
2  
3  
4  
5 **14.8. APPENDIX H: Follow-up Survey – Female**  
6  
7

8  
9 **FOLLOW-UP SURVEY**  
10 **Identifying efficient linkages strategies for HIVST (IDEaL)**  
11 **Female**  
12  
13

14  
15  
16 **Complete this form for women whose:**

17 **(1) Partners consented to be in the study 4-months ago**

18 **Date of Interview:** \_\_\_\_\_

19 **Site Code:** \_\_\_\_\_

20 **Full Name of Interviewer:** \_\_\_\_\_

21 **Participant Study ID#:** \_\_\_\_\_

22  
23  
24  
25

| #    | Question                                                                                                                      | Response                                                                                                                                                                                                                                                                                                                                                                           |
|------|-------------------------------------------------------------------------------------------------------------------------------|------------------------------------------------------------------------------------------------------------------------------------------------------------------------------------------------------------------------------------------------------------------------------------------------------------------------------------------------------------------------------------|
| c1a  | Please think about your primary partner in the last 4 months.<br><br>Has your relationship changed in the last 4 months? How? | <input type="checkbox"/> Nothing changed (1)<br><input type="checkbox"/> Married (2)<br><input type="checkbox"/> Steady Boyfriend (3)<br><input type="checkbox"/> Moved out of the house (4)<br><input type="checkbox"/> Became an infrequent partner (5)<br><input type="checkbox"/> Separated (6)<br><input type="checkbox"/> Divorced (7)<br><input type="checkbox"/> Other (8) |
| c4a  | Have you disclosed your HIV status to this partner?                                                                           | <input type="checkbox"/> Yes (1)<br><input type="checkbox"/> No (0)                                                                                                                                                                                                                                                                                                                |
| c5a  | Have you had any new children with this partner since we last spoke?                                                          | <input type="checkbox"/> Yes (1)<br><input type="checkbox"/> No (0)                                                                                                                                                                                                                                                                                                                |
| c18a | To your knowledge, did your partner start ART?                                                                                | <input type="checkbox"/> Yes (1)<br><input type="checkbox"/> No, they do not plan to link (2)<br><input type="checkbox"/> No, but they plan to link (3)                                                                                                                                                                                                                            |

26  
27  
28  
29  
30  
31  
32  
33  
34  
35  
36  
37  
38  
39  
40  
41  
42  
43  
44  
45  
46  
47  
48  
49  
50  
51  
52  
53  
54  
55  
56  
57  
58  
59  
60

|                                |                                                                                                                     |                                                                                                                         |
|--------------------------------|---------------------------------------------------------------------------------------------------------------------|-------------------------------------------------------------------------------------------------------------------------|
|                                |                                                                                                                     | <input type="checkbox"/> Unsure (88)                                                                                    |
| <b>Unintended Consequences</b> |                                                                                                                     |                                                                                                                         |
| c19a                           | Did you pressure your partner to initiate ART?                                                                      | <input type="checkbox"/> Yes (1)<br><input type="checkbox"/> No (0)                                                     |
| c20a                           | After enrolling in the study, did anyone find out your HIV status against your will (unwanted disclosure)?          | <input type="checkbox"/> Yes (1)<br><input type="checkbox"/> No (0)                                                     |
| C20b                           | After enrolling in the study, did anyone find out your partners' HIV status against his will (unwanted disclosure)? | <input type="checkbox"/> Yes (1)<br><input type="checkbox"/> No (0)                                                     |
| c21a                           | After enrolling in the study, did your partner....<br><br>Threaten to hurt or harm you or someone you cared about.  | <input type="checkbox"/> Yes (1)<br><input type="checkbox"/> No (0)<br><input type="checkbox"/> Refused to respond (99) |
| c22a                           | Insulted you or made you feel bad about yourself.                                                                   | <input type="checkbox"/> Yes (1)<br><input type="checkbox"/> No (0)<br><input type="checkbox"/> Refused to respond (99) |
| c23a                           | Hit, slapped, kicked or did anything else meant to physically hurt you.                                             | <input type="checkbox"/> Yes (1)<br><input type="checkbox"/> No (0)<br><input type="checkbox"/> Refused to respond (99) |
| C23b                           | Forced sexual intercourse and other forms of sexual coercion                                                        | <input type="checkbox"/> Yes (1)<br><input type="checkbox"/> No (0)<br><input type="checkbox"/> Refused to respond (99) |

|      |                                                                                                                                                                         |                                                                                                                                                                                                                                                                                                     |
|------|-------------------------------------------------------------------------------------------------------------------------------------------------------------------------|-----------------------------------------------------------------------------------------------------------------------------------------------------------------------------------------------------------------------------------------------------------------------------------------------------|
| C23c | Slept with another woman.                                                                                                                                               | <input type="checkbox"/> Yes (1)<br><input type="checkbox"/> No (0)<br><input type="checkbox"/> Refused to respond (99)                                                                                                                                                                             |
| c24a | Ended the relationship                                                                                                                                                  | <input type="checkbox"/> Yes (1)<br><input type="checkbox"/> No (0)<br><input type="checkbox"/> Refused to respond (99)                                                                                                                                                                             |
| c25a | <p><i>Now, I am going to ask you a series of questions about who makes within this relationship</i></p> <p>Who usually decides how the money you earn will be used?</p> | <input type="checkbox"/> Yourself (respondent)<br><input type="checkbox"/> Jointly (This partner and you together)<br><input type="checkbox"/> Mainly this partner<br><input type="checkbox"/> Someone else<br><input type="checkbox"/> Do not earn money<br><input type="checkbox"/> Refuse to say |
| c26a | Who usually decides how your partner's earnings will be used?                                                                                                           | <input type="checkbox"/> Yourself (respondent)<br><input type="checkbox"/> Jointly (This partner and you together)<br><input type="checkbox"/> Mainly this partner<br><input type="checkbox"/> Someone else<br><input type="checkbox"/> Refuse to say                                               |
| c27a | Who usually makes decisions about health care for yourself?                                                                                                             | <input type="checkbox"/> Yourself (respondent)<br><input type="checkbox"/> Jointly (This partner and you together)<br><input type="checkbox"/> Mainly this partner<br><input type="checkbox"/> Someone else<br><input type="checkbox"/> Refuse to say                                               |

1  
2  
3  
4  
5  
6  
7  
8  
9  
10  
11  
12  
13  
14  
15  
16  
17  
18  
19  
20  
21  
22  
23  
24  
25  
26  
27  
28  
29  
30  
31  
32  
33  
34  
35  
36  
37  
38  
39  
40  
41  
42  
43  
44  
45  
46  
47  
48  
49  
50  
51  
52  
53  
54  
55  
56  
57  
58  
59  
60

| Additional Questions |                                                                           |                                                                     |
|----------------------|---------------------------------------------------------------------------|---------------------------------------------------------------------|
| d1                   | Would you recommend the ART intervention to other male friends or family? | <input type="checkbox"/> Yes (1)<br><input type="checkbox"/> No (0) |
| d2                   | Are you happy your partner was in the ART intervention?                   | <input type="checkbox"/> Yes (1)<br><input type="checkbox"/> No (0) |

Thank the participant for their time and end the survey

For peer review only

**FOLLOW-UP SURVEY**  
**Identifying efficient linkages strategies for HIVST (IDEaL)**  
 Female (Chichewa)

**Complete this form for women whose:**

**(1) Partners consented to be in the study 4-months ago**

**Date of Interview:** \_\_\_\_\_

**Site Code:** \_\_\_\_\_

**Full Name of Interviewer:** \_\_\_\_\_

**Participant Study ID#:** \_\_\_\_\_

| #    | Question                                                                                                                                                                                                    | Response                                                                                                                                                                                                                                                                                                                                                                                      |
|------|-------------------------------------------------------------------------------------------------------------------------------------------------------------------------------------------------------------|-----------------------------------------------------------------------------------------------------------------------------------------------------------------------------------------------------------------------------------------------------------------------------------------------------------------------------------------------------------------------------------------------|
| c1a  | <p>Taganizani za bwenzi lanu logonana nalo lomwe lakhala lodalilika kwa miyesi folo yapitayi.</p> <p>Kodi ubwenzi wanu wasintha munjira ina iliyonse mu miyezi folo yapitayi?</p> <p>Bwenzi lokhazikika</p> | <input type="checkbox"/> Palibe chasintha (1)<br><input type="checkbox"/> Married (2)<br><input type="checkbox"/> Bwenzi lokhazikika (3)<br><input type="checkbox"/> Chibwenzi Chinachoka pakhomo (4)<br><input type="checkbox"/> Chibwenzi cha apo ndi apo (5)<br><input type="checkbox"/> Separated (6)<br><input type="checkbox"/> Banja linatha (7)<br><input type="checkbox"/> Other (8) |
| c4a  | Kodi munawauza abwenzi anuwa za mmene mulili mnthupi mwanu ku mbali ya HIV?                                                                                                                                 | <input type="checkbox"/> Eya(1)<br><input type="checkbox"/> Ayi(0)                                                                                                                                                                                                                                                                                                                            |
| c5a  | <p>Have you had any new children with this partner since we last spoke?</p> <p>Kodi mwakhala ndi ana ndi abwenzi anuwa kuchokera ulendo watha tinayankhulana?</p>                                           | <input type="checkbox"/> Eya(1)<br><input type="checkbox"/> Ayi(0)                                                                                                                                                                                                                                                                                                                            |
| c18a | Mongamukudziwira, kodi bwenzi lanu linayamba kumwa mwankhala a ama ARV?                                                                                                                                     | <input type="checkbox"/> Eya<br><input type="checkbox"/> Ayi, sakulingalira zoyamba kumwa mwankhwala a ma ARV<br><input type="checkbox"/> Ayi, koma                                                                                                                                                                                                                                           |

|                                |                                                                                                                                             |                                                                                                                        |
|--------------------------------|---------------------------------------------------------------------------------------------------------------------------------------------|------------------------------------------------------------------------------------------------------------------------|
|                                |                                                                                                                                             | akulingalira zoyamba<br><input type="checkbox"/> Unsure (88)                                                           |
| <b>Unintended Consequences</b> |                                                                                                                                             |                                                                                                                        |
| c19a                           | Kodi munawakakamiza a bwenzi anu kuti ayambe kumwa mankhwala a ama ARV?                                                                     | <input type="checkbox"/> Eya(1)<br><input type="checkbox"/> Ayi(0)                                                     |
| c20a                           | Chilowereni mu study, alipo omwe anadziwa za m'mene mulili mnthupi mwanu kumbari ya HIV inu musakufuna? (Kuwulula za HIV mosafuna)          | <input type="checkbox"/> Eya(1)<br><input type="checkbox"/> Ayi(0)                                                     |
| C20b                           | Chilowereni mu study, alipo omwe anadziwa za m'mene mulili mnthupi mwa bwenzi lanu kumbari ya HIV eni asakufuna? (Kuwulula za HIV mosafuna) | <input type="checkbox"/> Eya(1)<br><input type="checkbox"/> Ayi(0)                                                     |
| c21a                           | Chilowereni mu study, kodi bwenzi lanu.....<br><br>Linaospyeza kuvulaza inu kapena wina aliyense amane mumamukonda?                         | <input type="checkbox"/> Eya(1)<br><input type="checkbox"/> Ayi(0)<br><input type="checkbox"/> Refused to respond (99) |
| c22a                           | Anakunyoza kapenanso kukupangitsani kuti muzizikayikila.                                                                                    | <input type="checkbox"/> Eya(1)<br><input type="checkbox"/> Ayi(0)<br><input type="checkbox"/> Refused to respond (99) |
| c23a                           | Anakumenyani ndikukupwetekani.                                                                                                              | <input type="checkbox"/> Eya(1)<br><input type="checkbox"/> Ayi(0)<br><input type="checkbox"/> Refused to respond (99) |
| C23b                           | Kukukakamizani kugonana ndi zinthu zina?                                                                                                    | <input type="checkbox"/> Eya(1)<br><input type="checkbox"/> Ayi(0)<br><input type="checkbox"/> Refused to respond (99) |
| C23c                           | Kuchita mtchitidwe ogonana ndi mzimayi wina                                                                                                 | <input type="checkbox"/> Eya(1)<br><input type="checkbox"/> Ayi(0)                                                     |

|      |                                                                                                                                                                  |                                                                                                                                                                                                                      |
|------|------------------------------------------------------------------------------------------------------------------------------------------------------------------|----------------------------------------------------------------------------------------------------------------------------------------------------------------------------------------------------------------------|
|      |                                                                                                                                                                  | <input type="checkbox"/> Refused to respond (99)                                                                                                                                                                     |
| c24a | Kuthetsa Chibwenzi                                                                                                                                               | <input type="checkbox"/> Eya(1)<br><input type="checkbox"/> Ayi(0)<br><input type="checkbox"/> Refused to respond (99)                                                                                               |
| c25a | Tsopano ndikufunsani mafunso okhuzana ndi omwe amalamula pakhomu panu.<br><br>Kodi amalamula za mmene ndalama zomwe mwapeza zitagwilitsidwile ntchito ndi ndani? | <input type="checkbox"/> Amene akuyankha<br><input type="checkbox"/> Mogwirizana<br><input type="checkbox"/> Nthawi zambiri bwenzi<br><input type="checkbox"/> Munthu wina<br><input type="checkbox"/> Refuse to say |
| c26a | Kodi amalamulila za mmene ndalama za abwenzi anu zingagwilitsidwile ntchito ndi ndani?                                                                           | <input type="checkbox"/> Amene akuyankha<br><input type="checkbox"/> Mogwirizana<br><input type="checkbox"/> Nthawi zambiri bwenzi<br><input type="checkbox"/> Munthu wina<br><input type="checkbox"/> Refuse to say |
| c27a | Kodi amene amakhala ndi ulamulilo pa chisamalilo cha moyo wanu ndi ndani?                                                                                        | <input type="checkbox"/> Amene akuyankha<br><input type="checkbox"/> Mogwirizana<br><input type="checkbox"/> Nthawi zambiri bwenzi<br><input type="checkbox"/> Munthu wina<br><input type="checkbox"/> Refuse to say |

| Additional Questions |                                                                                                                   |                                                                    |
|----------------------|-------------------------------------------------------------------------------------------------------------------|--------------------------------------------------------------------|
| d1                   | Kodi mungalimbikitse anzanu ena achizibambo kapena apabanja panu kutenga nawo mbali mu ART intervention munaliyi? | <input type="checkbox"/> Eya(1)<br><input type="checkbox"/> Ayi(0) |
| d2                   | Kodi muli okondwa kuti munatenga nawo mbali mu ART intervention?                                                  | <input type="checkbox"/> Eya(1)<br><input type="checkbox"/> Ayi(0) |



## 14.9. APPENDIX I: Data Extraction Tool

---

### DATA EXTRACTION TOOL

#### Identifying efficient linkages strategies for HIVST (IDEaL)

English only

---

#### **INSTRUCTIONS:**

The Medical Chart Review will be used to link the male study participant with the facilities ART records and to document their facility visits over the 4-months of study participation. Please follow the instructions to prepare for data collection (1) gather all ART registers that were active between DAY MONTH YEAR up to today (2) enter and re-enter the participant ID's who have reached the 4-month follow up period into the tablet (3) once you have re-entered, the tablet will provide you with identifying information about the male study participant. (5) match the participants information with information provided by the ART register to see if the participant initiated ART or not. If a participant did not initiate care (i.e. you cannot find him in the ART register), still enter the initial data points and indicate that the participant did not

| Code     | Question                        | Responses                                                                                                                                                                                                                                                                                                                                                                                                                                       |
|----------|---------------------------------|-------------------------------------------------------------------------------------------------------------------------------------------------------------------------------------------------------------------------------------------------------------------------------------------------------------------------------------------------------------------------------------------------------------------------------------------------|
| pid      | Please enter the Participant ID |                                                                                                                                                                                                                                                                                                                                                                                                                                                 |
| district | District                        | <input type="checkbox"/> Chickwawa<br><input type="checkbox"/> Nkhotakota<br><input type="checkbox"/> Lilongwe<br><input type="checkbox"/> Kasungu                                                                                                                                                                                                                                                                                              |
| site     | Facility name                   | <input type="checkbox"/> Chickwawa District Hospital<br><input type="checkbox"/> St. Montford Mission Hospital<br><input type="checkbox"/> Kalemba Community Hospital<br><input type="checkbox"/> Kasungu District Hospital<br><input type="checkbox"/> Nkhoma Community Hospital<br><input type="checkbox"/> Mponela Rural Hospital<br><input type="checkbox"/> Deayang Luke Hospital<br><input type="checkbox"/> Nkhotakota District Hospital |

|            |                                                                                                                                                                                                                                                                                                                                                                                                                                                                                                                                                                                                                                                             |                                                                                                             |
|------------|-------------------------------------------------------------------------------------------------------------------------------------------------------------------------------------------------------------------------------------------------------------------------------------------------------------------------------------------------------------------------------------------------------------------------------------------------------------------------------------------------------------------------------------------------------------------------------------------------------------------------------------------------------------|-------------------------------------------------------------------------------------------------------------|
|            |                                                                                                                                                                                                                                                                                                                                                                                                                                                                                                                                                                                                                                                             | <input type="checkbox"/> Nsanje District Hospital<br><input type="checkbox"/> Ngabu Rural Hospital          |
|            | <p><i>We want to know if this participant initiated ART. Please look at the ART register used at the clinic between DATE MONTH YEAR up to today</i></p> <p><i>Instructions: Look for the below information in the ART register, matching the below participant with a name in the ART register.</i></p> <p><i>Sometimes it is hard to find an exact match in the ART register. Consider it a match if 3 of the 4 data points match. For example, someone's name may be different, but the age, and village/residence matches. Consider this the same person.</i></p> <p><i>CLIENT NAME:</i></p> <p><i>AGE:</i></p> <p><i>Ta:</i></p> <p><i>Village:</i></p> |                                                                                                             |
| found_art  | Was the participant found in the ART register?                                                                                                                                                                                                                                                                                                                                                                                                                                                                                                                                                                                                              | <input type="checkbox"/> Yes (1) – proceed to next question<br><input type="checkbox"/> No (0) – end survey |
| art_number | What is the participant assigned ART number?                                                                                                                                                                                                                                                                                                                                                                                                                                                                                                                                                                                                                |                                                                                                             |
| art_date   | What is the clients ART start date?                                                                                                                                                                                                                                                                                                                                                                                                                                                                                                                                                                                                                         | <p>____/____/____</p> <p>Day    Month    Year</p>                                                           |

|                      |                                                                                                        |                                                                                                             |
|----------------------|--------------------------------------------------------------------------------------------------------|-------------------------------------------------------------------------------------------------------------|
|                      | <i>Use the ART number to find the paper Mastercard OR look up the participant in the Baobab system</i> |                                                                                                             |
| mastercard_fo<br>und | Did you find the mastercard/baobab record?                                                             | <input type="checkbox"/> Yes (1) – proceed to next question<br><input type="checkbox"/> No (0) – end survey |
| tb                   | At initiation: TB                                                                                      | <input type="checkbox"/> Yes (1)<br><input type="checkbox"/> No (0)                                         |
| ks                   | At initiation: KS                                                                                      | <input type="checkbox"/> Yes (1)<br><input type="checkbox"/> No (0)                                         |
| pillcount            | Number of pills given                                                                                  |                                                                                                             |
| nextapp_date         | Date of next appointment                                                                               | ____ / ____ / ____<br>Day    Month    Year                                                                  |
| nextconsult_d<br>ate | Date of next consultation visit                                                                        | ____ / ____ / ____<br>Day    Month    Year                                                                  |

**END OF SURVEY**

## 14.10. APPENDIX J: In-Depth Interview Guide – Female

---

### IN-DEPTH INTERVIEW GUIDE Identifying efficient linkages strategies for HIVST (IDEaL) Female

---

#### BEGIN RECORDING

Original Study ID: \_\_\_\_\_

Repeat Original Study ID: \_\_\_\_\_

State if male or female respondent \_\_\_\_\_

Health Facility: \_\_\_\_\_

Date of Interview: \_\_\_\_\_

Full Name of Interviewer: \_\_\_\_\_

District where respondent Lives: \_\_\_\_\_

#### Open- Ended Questions

*Note: The in-depth interview will be open-ended and guided by the respondent's answers. This outline reflects a general guide for the in-depth interviews.*

*The interviews are meant to help us understand barriers and facilitators to ART initiation. We are also interested in their thoughts on new interventions we are developing to help men start ART. The following questions are meant to guide interviewers. Actual questions asked during the interview will vary based on participant responses.*

#### DEMOGRAPHICS:

Demographics on the female participant not collected. Already in the original study. Just make sure the Original Study ID is documented correctly.

1. What type of job/work does your partner do?
  - a. If he does not work, why?
  - b. Does he do anything else to earn money?
2. What time of day/week is your partner usually busy?
3. Where does he spend most of his time when he is not working?
  - a. *Probe: At the bar, watching football, at church, at home...*
4. How long have you been in a relationship with your sexual partner (whom you gave the HIVST kit to)

**HIV TESTING:**

Now I'd like to talk to you about you and your partner's experience with HIV services

- 1) To your knowledge, has your partner tested for HIV before you gave him the HIV-self testing kit?
  - a) IF YES, did he tell you the result? What was his result?
  - b) IF HIV+: At that time, did he start ART? IF NO: Why not?
- 2) Think about when you gave the HIV self-test kit to your sexual partner (show the kit).
  - a) How did your partner feel about his HIV positive test result? How did the result affect him?
  - b) How did you feel after your partner received an HIV positive status on the HIV self-test kit? How did the result affect you?
  - c) Did your relationship change at all after he received an HIV-positive status? How?
  - d) Did he talk to anyone about it?/ who?
  - e) Did he disclose to anyone besides you? Why/why not?

**ART UPTAKE:**

- 1) After he tested HIV-positive, did he initiate ART? Why/Why not?
  - a) IF INITIATED ART: How long did it take him to initiate ART? (several weeks, several months?). Why did you initiate ART so quickly/slowly? /

We know starting ART is difficult.

- 1) What do you think is the most difficult thing about starting ART for your partner right now?
  - a) Do you think this is the same for men and for women? How is it different?
  - b) How does taking ART affect one's daily activities? (schedule/routine) In bad ways? In good ways? Is it different for men? How?
  - c) How does taking ART affect relationships? In bad ways? In good ways? Is it different for men? How?
  - d) Out of all these things you mentioned, what do you think is the biggest concern/problem for your partner?

**FOR MEN WHO ARE CONSIDERED LOSS-TO-FOLLOW UP**

1. Since we saw you last, we haven't been able to follow up with your partner. From your perspective, why do you think this is?
2. Since your partner was enrolled in our study, what kind of things did you notice or did he mention to you related to HIV health services?
  - a. *Probe: phone calls/SMS or speak one-on-one to a health care worker? Was your partner visited by a health care professional within your home or in the community?*
3. Has your partner mentioned any of these interactions to anyone?
  - a. *Probe: friends, family, community members*
4. How did your partner react to these things? Did he like/dislike them? What did he do when they happened?
  - a. *Probe: phone call, SMS, in-person visit, home-based ART*
5. How did you react to these things? Did you like/dislike them?
  - a. *Probe: Was there any reaction amongst your family, friends or the community to these things?*
  - b. *If so, how did this affect your partner and/or you?*

**SUGGESTIONS FOR ART SERVICES**

Thank you for all the information. We would like to develop ART services that meet the needs of individuals in your community. We understand that men may face different challenges than women. I would like to know your opinion about what is needed in order to make ART services easy to access and use.

- 1) Could you describe the ideal way ART services would be given to your partner? If the clinic could do anything ...
  - a) When would he want to pick up ART?
    - i) Probe: day of week, time of day?
    - ii) *Why do you say this?*
  - b) Where would he want to pick up ART?
    - i) Probe: clinic near you, clinic far from you, somewhere in the community (WHERE SPECIFICALLY), at your home?
    - ii) *Why do you say this?*
- 2) Do you think your partner needs more HIV-related information? About the benefits of ART, how to keep his status a secret, or how to disclose his status, about other aspects of his health?
  - a) IF YES: How would he want to get this information? In person (one on one, pamphlet, radio, phone call, ...)
  - i) Probe: IF YES: WHO would he like to talk to about this information? (Provider, expert client, other community member)
- 3) Does he need support? For example, reminders to go to the health facility, someone to talk to regularly about what he is going through with ART, help disclosing his status, anything else).
  - a) *Probe: IF YES: How would he want to get this support? In person (one on one, pamphlet, radio, phone call)*
  - b) *Probe: IF YES: WHO would he like to talk to about this support? (Provider, expert client, other community member)*
- 4) Out of time of pick up, location, more information, or more support, what are the most important factors for your partner to use ART services?
  - a) *PROBE: Think about other males. What do you think they would say is the most important factor for men to use ART services?*

## **SPECIFIC SUGGESTIONS ON CURRENT INTERVENTIONS**

### **FOR MEN WHO ARE CONSIDERED LOSS-TO-FOLLOW UP**

1. As discussed earlier, your partner received [phone calls, texts, in person counseling, home-based ART].
  - a. *Do you feel that this was enough to encourage him to start ART?*
    - i. *If NO, what would you have done differently? (frequency, content, location)*
    - ii. *If YES, why do you think they were sufficient?*
  - b. Are there any other ideas/services we should think about doing beside the ones we just talked about (appointment reminders, in-depth counseling, community/home ART)?/
    - i. PROBE: What is it?
    - ii. Why do you think this could work?

## CONCLUSION

Thank you for your time.

1. Is there anything else you would like to say about men's use of ART?
2. Is there anything else you would like to say about your own use of ART and how we can help make your experience better?

**STOP THE RECORDER AND MAKE SURE RECORDING IS SAVED.**

**THANK YOU FOR YOUR PARTICIPATION IN THIS INTERVIEW. LET ME ENCOURAGE YOU THAT ARVS CAN HELP YOU LIVE LONG AND HEALTHY.**

*The following general education messages should be conveyed to all male and female participants:*

- All people who have been tested HIV positive should start ART as soon as possible for their own health and to prevent passing the virus on to others.
- Serious diseases can occur even in patients with high CD4 count (>500), without any previous symptoms. Immediate ART greatly reduces this risk.
- People that start ART and continue lifelong without interruptions can remain healthy and live as long as people without HIV.
- Even though you may not feel sick, ART is still important to keep you healthy for the rest of your life.
- ART reduces the amount of virus in your body and therefore can reduce the chance that HIV is passed to your sex partners.
- Current ART regimens are easy to take and rarely cause serious side-effects. Some people have side effects in the first few weeks of treatment and these almost always go away. IF there are persistent side effects, an alternative HIV regimen can be given.

*NOTE: Be careful not to give any specific medical advice but rather refer respondents back to the clinic to speak to a provider.*

---

**IN-DEPTH INTERVIEW GUIDE**  
**Identifying efficient linkages strategies for HIVST (IDEaL)**  
 Female (Chichewa)

---

**BEGIN RECORDING**

Original Study ID: \_\_\_\_\_

Repeat Original Study ID: \_\_\_\_\_

State if male or female respondent \_\_\_\_\_

Health Facility: \_\_\_\_\_

Date of Interview: \_\_\_\_\_

Full Name of Interviewer: \_\_\_\_\_

District where respondent Lives: \_\_\_\_\_

**Demographics**

- 1) Kodi bwenzi lanu limagwira ntchito yanji kuti apeze ndalama?
  - a) Ngati sagwira ntchito ndi chifukwa chani?
  - b) Kodi amapanga zinthu zina zothandizira kupeza ndalama?
- 2) Kodi nthawi ndi nthawi iti ya tsiku/sabata lomwe bwenzi lanu limakhala lotanganidwa?
- 3) Kodi nthawi yawo yambiri amakhala ali kuti ngati sakugwira ntchito?
- 4) Kodi mwakhala pa ubwenzi kwa nthawi yayitali bwanji ndi bwenzi lanu logonana nalo (lomwe munalipitsa ka chida koziyezela wekha HIV)

**HIV-Testing**

Pano ndimafuna ndikufunsi mafunso okhudzana ndi zomwe mwakumanapo nazo zokhudza thandizo la HIV.

1. Momwe mukudziwira kodi bwenzi lanu linayamba layezetsapo HIV musanawapatse kachida koziyeza wekha HIV?
  - a. Ngati eya, anakuwuzani zotsatira? Zotsatira zawo zinali zotani?
  - b. Ngati anapezeka ndi HIV nthawi imeneyo, anayamba kumwa ma ARV? Ngati ayi chifukwa chani?
2. Ganizirani nthawi yomwe mudapereka kachipangizo kodziyezera wekha HIV (awonetseni) kwa bwenzi lanu.
  - a. Kodi bwenzi lanu linanva bwanji atadziwa za zotsatira zawo za HIV? Zotsatirazo anazilandira bwanji?
  - b. Kodi munamva bwanji bwenzi lanu litalandira zotsatira zoti lili ndi kachilombo ka HIV



- pa kachipangizoka? Izi zinakukhudzani bwanji?
- c. Kodi ubwenzi wanu udasintha atalandira zotsatira zoti ali ndi kachilombo? Motani?
  - d. Kodi analankhulapo ndi wina aliyense? Mosatchula dzina, ndani?
  - e. Kodi anawuzapo wina aliyense za mthupi mwake kupatula inu? Chifukwa chani?

## ART Uptake

- 1) Atadziyeza ndi kupeza kuti ali ndi kachilombo, kodi adakayamba kumwa mankhwala? Chifukwa?
  - a) Kodi zinatenga nthawi yaitali bwanji asanayambe kumwa mankhwala a ma ARV? (masabata angapo, miyezi ingapo?) Kodi anayamba kumwa mankhwala mnsanga/mochedwa chifukwa chani?
- 2) Tikudziwa kuti kuyamba kumwa mankhwala a ARV kumavutirapo. Kodi mukuona kuti chovuta chachikulu pa kuyamba kumwa mankhwala ndi chani?
  - a) Kodi mukuganiza kuti izi ndi zofanana kwa amuna ndi akazi? Nzosiyana chifukwa chani?
  - b) Kodi kumwa mankhwala a ma ARV kumakhudza bwanji kagwiridwe ka ntchito ka munthu tsiku ndi tsiku (ntchito zomwe amagwiragwira) Mu njira yabwino kapena yobwera mmbuyo? Ndi zosiyana kwa amuna? Motani?
  - c) Kodi kumwa mankhwala a ma ARV kumakhudza bwanji mwaubwenzi? Mu njira yabwino kapena yobwera mmbuyo? Ndi zosiyana kwa amuna? Motani?
  - d) Pa zinthu zonse zomwe tambambikalana, mukuona kuti vuto lalikuru kwa bwenzi lanu ndi chani?

## FOR MEN WHO ARE CONSIDERED LOSS-TO-FOLLOW UP

- 1) Chiwonelaneni ulendo watha, talephela kuonananso ndi bwenzi lanu. Mumaganizo anu mukuona kuti zili motere chifukwa chani?
- 2) *Chilowereni cha bwenzi lanu mu study, mwaonako zinthu zotani kapena zomwe atchulako zokhudzana ndi thandizo la HIV?*
  - a) *Funsitsani: Lamya ya m'manja/uthenga wa pa lamya kapena kuyankhula ndi wazaumoyo? Kodi bwenzi lanu linayendeledwapo ndi wazaumoyo mu dela lanu kapena pafupi ndi nyumba yanu?*
- 3) Kodi bwenzi lanu lathculako mikumano iyi kwa wina aliyense?
  - a) *Funsitsani: Anzawo, achibale, anthu a mudela*
- 4) Kodi bwenzi lanu linapangapo chani pa zinthu izi? Anazikonda/sana zikonde? Anapanga chani zitachitika?
  - a) *Funsitsani: Lamya ya m'manja/uthenga wa pa lamya, kupita okha, thandizo la ARV lapakhomo*
- 5) Munanva bwanji kuzinthuzi? Munazikonda/simunazikonde?
  - a) *Achibale anapanga chilichonse, anzanu, anthu a mudela ku zinthu zimenezi?*
  - b) *Ngati zili choncho, izi zinawatani a bwenzi anu /inuyo*

## SUGGESTIONS FOR ART SERVICES

Zikomo chifukwa cha mayankho anu. Timafuna titakhazikitsa ndondomeko zokomera anthu mu dera lanu pokhudza thandizo la ma ARV. Tikudziwa kuti amuna amakumana ndi zophinja/mavuto osiyana

1  
2  
3 ndi amayi. Ndimafuna ndimve maganizo anu pa zofunika kuti tikonze bwino thandizoli kuti likhale  
4 losavuta kufikira ndi kugwiritsa ntchito.  
5

- 6  
7 1) Momwe mukuganizira, kodi mungandiuzeke njira yabwino kwambiri yomwe mukuganiza kuti  
8 thandizo la ARV lingamaperekedwere kwa bwenzi lanu? Chipatala chitatu chichitepo kanthu....  
9 a) Kodi bwenzi lanu lingafune lidzipita nthawi zotani ku chipatala kukatenga mankhwala  
10 i) Tsiku la mu sabata, nthawi?  
11 ii) *Ndi chifukwa chani?*  
12 b) Kodi ndi malo ati omwe bwenzi lanu lingakonde kumakatengerako ARV?  
13 i) Pa chipatala cha pafupi nanu, kutali nanu, kwina mu dela lino (MALO ATI KWENIKWENI)  
14 pakhomo panu  
15 ii) *Ndi chifukwa chani?*  
16  
17 2) Kodi mukuganiza kwanu, mukuona kuti bwenzi lanu likufunika uthenga wina owonjezera? Pa  
18 zokhudza ubwino wa ARV, momwe lingasungire chinsinsi cha momwe mthupi mwawo mulili kapena  
19 kuwauza ena za mthupi mwawo, zina zikhuzana ndi thanzi lawo?  
20 a) Bwenzi lanu lingakonde litalandira mu njira yotani uthengawu? Kukawapeza paokha (paokha,  
21 kulembedwa mu bukhu, pa wailesi, kuimbidwa fonu)  
22 b) Ndi NDANI amene bwenzi lanu lingakonde kulankhula naye za uthengawu? (Dokotala, Expert  
23 Client, anthu ena a mu dera)  
24  
25 3) Kodi mukuganiza kuti bwenzi lanu likufunika thandizo lapadera? Mwachitsanzo, kukumbutsidwa kuti  
26 lipite ku chipatala, kulankhula ndi munthu wina mowirikiza pa zomwe akukumana nazo pakumwa  
27 ARV, kuthandizidwa kuuza ena za mmomwe mthupi mwawo mulili ndi zina)  
28 a) *Bwenzi lanu lingakonde litalandira mu njira yotani thandizoli? Kukawapeza pawokha (pawokha,*  
29 *kulembedwa mu bukhu, pa wailesi, kuimbidwa fonu)*  
30 b) *Ndi NDANI amene bwenzi lanu lingakonde kulankhula naye za thandizoli? (Dokotala, Expert*  
31 *Client, anthu ena a mu dera)*  
32  
33 4) Potengera thandizo ndi chisamaliro cha ma ARV, pakati pa nthawi yokatengera mankhwala, malo ake,  
34 uthenga owonjezera ndi thandizo la padera, kodi mukuganiza kuti chofunikira kwambiri ndi chiti kwa  
35 bwenzi lanu?  
36 a) *Ganizirani amuna ena a mdera lanu. Kodi mukuganiza kuti iwo angatchule chani ngati chinthu*  
37 *chofunikira kwambiri kwa amuna pa zomwe tachula zija?*  
38  
39  
40  
41

## 42 **SPECIFIC SUGGESTIONS ON CURRENT INTERVENTIONS**

### 43 FOR MEN WHO ARE CONSIDERED LOSS-TO-FOLLOW UP

- 44  
45  
46  
47  
48 1) Monga takambirana kale poyamba, bwenzi lanu linalandira (Kuyimbilidwa lanyo, uthenga wa pa  
49 lanya, malangizo, thandizo la ma ARV la pakhomo)  
50 a) *Mukuwona ngati izi zinali zokwanira kulimbikitsa bwenzi lanu kuyamba ma ARV?*  
51 i) *Ngati ayi ndi chani mukanapanga mosiyana? (malo)*  
52 ii) *Ngati eya mukuwona ngati zili zofunika chifukwa chani?*  
53  
54 2) Kodi pali maganizo ena omwe mukuona kuti angathandizepo kupatula omwe tatchulawa  
55 (kukumbutsana, uphungu wapadera, kugawa mankhwala kumudzi) ndi chani?  
56  
57  
58  
59  
60

- a) Ndi chani?
- b) Ndi chifukwa chani mukuona kuti zikhoza kuyenda bwino

## CONCLUSION

- 1) Zikomo chifukwa cha nthawi yanu. Pali choonjezera china chilichonse chomwe mungalankhulepo chokhudza kagwiritsidwe ntchito ka thandizo la ARV ndi amuna?
- 2) Pali chilichonse chokhudza kagwiritsidwe ntchito kanu ka thandizo la ma ARV ndi momwe tingakonzere thandizoli?

### **STOP THE RECORDER AND MAKE SURE RECORDING IS SAVED.**

ZIKOMO CHIFUKWA CHOTENGA NAWO MBALI MU KAFUKUFUKUYU. NDIMAFUNA NDIKULIMBIKITSANI KUTI MA ARV AKHOZA KUTHANDIZA INU KUKHALA MOYO WAUTALI NDINSO WATHANZI.

*The following general education messages should be conveyed to all male and female participants:*

- Anthu onse omwe ayezetsa ndi kupezeka ndi kachilombo ka HIV akuyenera kuyamba kumwa mankhwala a ma ARV mwamsangamsanga kuti zipundulire thanzi lawo komanso apewe kupatsira ena kachilombo.
- Matenda oopsa akhoza kugwira munthu ngakhale amene chiwerengero cha asilikali a mnthupi ndi ochulukira (kuposera 500) posaonetsa zizindikiro zoyamba. Mankhwala a ma ARV amachepetsa chiopsezochi.
- Anthu omwe ayamba kumwa ma ARV ndipo akupitiliza moyo wawo onse osalekalekeza akhoza kukhala moyo wa thanzi ndi wautali chimodzimodzi anthu omwe alibe kachilombo ka HIV.
- Ngakhale simukumva kudwala, mankhwala a ARV ndi ofunikirabe kuti mukhale ndi thanzi moyo wanu onse.
- Mankhwala a ma ARV amachepetsa mlingo wa tidzilombo mthupi mwanu kotero amachepetsa chiposezo chopatsira kachilombo kwa ena.
- Mankhwala omwe alipo pakadali pano a ma ARV ndiosavuta kumwa komanso sakhala ndi mavuto ambiri. Anthu ena amakhala ndi mavuto obwera kamba komwa mankhwala masabata oyambirira koma izi zimatha. Ngati zikupitilirabe pali mtundu wina wa mankhwala omwe akhoza kukupatsani.

## 14.11. APPENDIX K: In-Depth Interview Guide – Male

---

**IN-DEPTH INTERVIEW GUIDE**  
**Identifying efficient linkages strategies for HIVST (IDEaL)**  
 Male

---

**BEGIN RECORDING**

Original Study ID: \_\_\_\_\_

Repeat Original Study ID: \_\_\_\_\_

State if male or female respondent \_\_\_\_\_

Health Facility: \_\_\_\_\_

Date of Interview: \_\_\_\_\_

Full Name of Interviewer: \_\_\_\_\_

District where respondent Lives: \_\_\_\_\_

**DEMOGRAPHICS:**

|                                                                                                                             |                                                                                                                                                                                                 |
|-----------------------------------------------------------------------------------------------------------------------------|-------------------------------------------------------------------------------------------------------------------------------------------------------------------------------------------------|
| 1. What is your current age in years?                                                                                       | Age in <input type="text"/> <input type="text"/><br>Completed Years                                                                                                                             |
| 2. How would you rate your health today on a scale from 1-5 with 1 being excellent health and 5 being the very poor health? | <input type="checkbox"/> Excellent (1)<br><input type="checkbox"/> Very good (2)<br><input type="checkbox"/> Good (3)<br><input type="checkbox"/> Fair (4)<br><input type="checkbox"/> Poor (5) |
| 3. Now I'd like to ask about your relationships. Are you currently in a sexual relationship?                                | <input type="checkbox"/> Yes (1)<br><input type="checkbox"/> No (0)<br><b>If NO, skip to QUALITATIVE</b>                                                                                        |
| 4. Does your partner know <u>your</u> HIV status?                                                                           | <input type="checkbox"/> Yes (1)<br><input type="checkbox"/> No (0)                                                                                                                             |

|                                                     |  |
|-----------------------------------------------------|--|
| 5. How many times have you tested for HIV?          |  |
| 6. When was the first time you tested HIV-positive? |  |

### Open- Ended Questions

*Note: The in-depth interview will be open-ended and guided by the respondent's answers. This outline reflects a general guide for the in-depth interviews.*

*The interviews are meant to help us understand barriers and facilitators to ART initiation. We are also interested in their thoughts on new interventions we are developing to help men start ART. The following questions are meant to guide interviewers. Actual questions asked during the interview will vary based on participant responses.*

SCRIPT: Now I'd like to talk to you about your experience with HIV services.

### HIV TESTING

1. Think about when you used an HIV self-test kit (show the kit). When did you use it?
2. How did you feel after receiving the HIV positive status?
3. Can you talk to me about what happened after you tested HIV positive? Walk me through it so I can see the picture in detail?.
  - a. Did you talk to anyone about it?
  - b. Has your HIV status changed your daily activities at all? (Your schedule/routine)
  - c. Has your HIV status impacted your relationships? How?
  - d. Have you disclosed your status to anyone besides your partner? Why/why not

### INTERVENTION

1. After you tested positive, we approached you to be a part of our study. Since you were enrolled in the study (ie in the last 3 months), can you walk me through what has happened related to HIV health services?
  - a. Probe: What kinds of interactions have you had with expert clients or health personelle (phone call, SMS, in-person visits, home based ART).
  - b. What was the frequency of these interactions (weekly, every other week, monthly)

### ART INITIATION

2. Since you have been enrolled in the study, have you initiated ART?

#### INITIATED

3. How long did it take you to initiate ART? (several weeks, several months?). Where did you initiate?
  - a. Why did you initiate ART so quickly/slowly?
4. Since you initiated treatment, have you continued to take you medication?

- 1  
2  
3 a. Have you returned to the clinic for another refill of ART? Have there been challenges to  
4 staying on treatment – how have you overcome them?  
5

6 **NOT INITIATED**

- 7  
8 1) Since you tested HIV-positive, have you been to a health facility?  
9 a) When did you attend? (year)  
10 b) Why did you attend? (guardian vs client; HIV vs OPD)  
11 c) Why did you not initiate ART during this visit?  
12

13 **ART UPTAKE**

- 14  
15 2) We know starting ART is difficult. What do you think is most the most difficult thing about starting  
16 ART?  
17 a) PROBE: Think about your male friends. What do you think they would say is the most difficult  
18 part about starting ART for men in your village?  
19

20 **INITIATED ART**

- 21 1) How has taking ART affected your daily activities at all? (your schedule/routine) In bad ways? In  
22 good ways?  
23 2) How has taking ART affected your relationships? In bad ways? In good ways?  
24 3) Does being on ART change if you are able to hide/keep your HIV status from other people/ If you are  
25 able to hide/keep your status other people, does that make it easier to be on ART? How?  
26

27 **NOT INITIATED ART**

- 28 1) How do you think taking ART would affect your daily activities at all? (your schedule/routine) In bad  
29 ways? In good ways?  
30 2) How do you think taking ART would affect your relationships? In bad ways? In good ways?  
31 3) Would being able to hide/keep your HIV status from other people make it easier for you to be on  
32 ART? How?  
33  
34 4) What do you think is most the SECOND most difficult thing about starting ART?  
35  
36 a) PROBE: Think about your male friends. What do you think they would say is the SECOND most  
37 difficult part about starting ART for men in your village?  
38  
39  
40

41 **SUGGESTIONS FOR ART SERVICES**

42 Thank you for all the information. We would like to develop ART services that meet the needs of men in  
43 your community. We understand that men are busy and may face different challenges than women. I  
44 would like to know your opinion about what is needed in order to make ART services easy to use for men  
45 in your community  
46

- 47  
48 1) Could you describe the ideal way ART services would be given to you? If the clinic could do anything  
49 a) When would you want to pick up ART?  
50 b) Probe: day of week, time of day?  
51 c) Why do you say this?  
52 2) Where would you want to pick up ART?  
53 a) Clinic near you, clinic far from you, somewhere in the community (WHERE SPECIFICALLY), at  
54 your home?  
55 b) Why do you say this?  
56  
57  
58  
59  
60

I would like to learn about how you felt about each of the interactions we talked about earlier (remind participant of what they mentioned – ex: phone calls, texts, in person visits, home based ART)

- 1) What did you like about them?
  - a) Why? (ex: individual follow-up, sense of support, not having to travel to the clinic for homebased ART)
- 2) What did you dislike about them? What were challenges?
  - a) Why? (ex: difficulty maintaining privacy with contact or visits, doesn't want to start ART for other reasons)
- 3) Do you feel like these things helped encourage you to seek health services?
  - a) If YES, why?
  - b) If NO, why?
- 4) Do you think these things would help other men in your community if they were to test positive for HIV?

#### INITIATED

- 1) Do you feel that these things helped to encourage you to initiate and stay on ART?
- 2) Do you think you would have started treatment without them?

#### NOT INITIATED

- 1) Why do you think these things failed to help you start/stay on treatment?
  - a) Why?
- 2) If you could change anything about these interactions that you have listed, what would you change?
  - a) Probe: Type of contact, frequency of contact, personelle, location, topics covered
- 3) We understand that everyone is different. Beyond what you have experienced, do you still have problems related to seeking health services for HIV? (i.e. are there still things that you need?)
  - a) What are these unmet needs?
  - b) What do you feel would be the best solution to meet those needs?
- 4) Are there any other ideas/services we should think about doing beside the ones we just talked about (appointment reminders, in-depth counseling, community/home ART)?
  - a) What is it?
  - b) Why do you think this could work?
- 5) Is there anything else that you would like to add as we are towards the end of the interview?

**STOP THE RECORDER AND MAKE SURE RECORDING IS SAVED.**

**THANK YOU FOR YOUR PARTICIPATION IN THIS INTERVIEW. LET ME ENCOURAGE YOU THAT ARVS CAN HELP YOU LIVE LONG AND HEALTHY.**

*The following general education messages should be conveyed to all male and female participants:*

- All people who have been tested HIV positive should start ART as soon as possible for their own health and to prevent passing the virus on to others.

- 1  
2  
3  
4  
5  
6  
7  
8  
9  
10  
11  
12  
13  
14  
15  
16  
17  
18  
19  
20  
21
- Serious diseases can occur even in patients with high CD4 count (>500), without any previous symptoms. Immediate ART greatly reduces this risk.
  - People that start ART and continue lifelong without interruptions can remain healthy and live as long as people without HIV.
  - Even though you may not feel sick, ART is still important to keep you healthy for the rest of your life.
  - ART reduces the amount of virus in your body and therefore can reduce the chance that HIV is passed to your sex partners.
  - Current ART regimens are easy to take and rarely cause serious side-effects. Some people have side effects in the first few weeks of treatment and these almost always go away. IF there are persistent side effects, an alternative HIV regimen can be given.

22  
23  
24  
25  
26  
27  
28  
29  
30  
31  
32  
33  
34  
35  
36  
37  
38  
39  
40  
41  
42  
43  
44  
45  
46  
47  
48  
49  
50  
51  
52  
53  
54  
55  
56  
57  
58  
59  
60

*Be careful not to give any specific medical advice but rather refer respondents back to the clinic to speak to a provider.*



**IN-DEPTH INTERVIEW GUIDE**  
**Identifying efficient linkages strategies for HIVST (IDEaL)**  
 Male (Chichewa)

**BEGIN RECORDING**

Original Study ID: \_\_\_\_\_

Repeat Original Study ID: \_\_\_\_\_

State if male or female respondent \_\_\_\_\_

Health Facility: \_\_\_\_\_

Date of Interview: \_\_\_\_\_

Full Name of Interviewer: \_\_\_\_\_

District where respondent Lives: \_\_\_\_\_

|                                                                                                                                                                     |                                                                                                                                                                                                                                                       |
|---------------------------------------------------------------------------------------------------------------------------------------------------------------------|-------------------------------------------------------------------------------------------------------------------------------------------------------------------------------------------------------------------------------------------------------|
| 1. Kodi pakadali pano muli ndi zaka zingati zakubadwa?                                                                                                              |                                                                                                                                                                                                                                                       |
| 2. Kodi thanzi lanu mungati lilibwanji lero pa mlingo wa 1 mpaka 5, pamene 1 akuyimira thanzi labwino kwambiri ndi 5 akuyimira kuti thanzi lanu silili bwino konse? | <input type="checkbox"/> Lili bwino kwambiri (1)<br><input type="checkbox"/> Lilibwino (2)<br><input type="checkbox"/> Pakati mpakati (3)<br><input type="checkbox"/> Silili bwino (4)<br><input type="checkbox"/> Silili bwino ngakhale pang'ono (5) |
| 3. Pano ndimafuna ndikufunsemi za maubwenzi. Kodi pakadali pano muli pa ubwenzi ogonana?                                                                            | <input type="checkbox"/> Eya (1)<br><input type="checkbox"/> Ayi (0)<br><b>If NO, skip to QUALITATIVE</b>                                                                                                                                             |
| 4. Kodi bwenzi lanu limadziwa kuti mthupi mwanu muli bwanji kumbali ya HIV?                                                                                         |                                                                                                                                                                                                                                                       |

|                                                                                               |  |
|-----------------------------------------------------------------------------------------------|--|
| 5. Mwayezetsa kokwana kangati HIV?                                                            |  |
| 6. Kodi ulendo oyamba omwe mudayezetsa ndi kukupezani ndi kachilombo ka HIV ndi liti? (chaka) |  |

Pano ndimafuna ndikufunsemi mafunso okhudzana ndi zomwe mwakumana nazo zokhudza ndi thandizo la HIV.

## HIV TESTING

- 1) Ganizirani nthawi yomwe mudagwiritsa ntchito kachipangizo kodziyezera wekha HIV (awonetseni), kodi liti mudagwiritsa kachipangizoka?
- 2) Kodi munamva bwanji mutaona kuti zikuonetsa kuti muli ndi kachilombo ka HIV?
- 3) Mungandifotokozele zomwe zinachitika mutayezetsa ndikupezeka ndi HIV? Mugafofokoze mwatsatanetsatane kuti ndione chithunzithunzi cha momwe zinalili?
  - a) Munalankhula ndi aliyense?
  - b) Kodi kudziwa kuti muli ndi kachilombo ka HIV kunasintha ntchito zanu za tsiku ndi tsiku?
  - c) Kodi kudziwa kuti muli ndi kachilombo ka HIV kunakhudza maubwenzi anu? Motani?
  - d) Kodi munayamba mwauzapo za momwe mthupi mwanu mulili kupatula kwa okondedwa anu? Chifukwa chani?

## INTERVENTION

- 1) Chifukwa choti munapezeka ndi HIV, tinakupezani kuti mutenge nawo mbali mu study yathu. Poti munatenga nawo mbali mu study (miyezi itatu yapitayi), mungandifotokozere zomwe zakhala zikuchitika zokhudza ndi thandizo la HIV?
  - a) Mwakhala ndi mikumano yotani ndi omwe ali kale pa ma ARV kapena a zaumoyo (pa lamyam, uthenga wa lamyam yam'manja, kuyankhulana pamaso, kupita nokha kukakumana nawo, kulandira thandizo la ma ARV pakhomo).
  - b) Kodi mikumanoyi imachitika pafupipafupi bwanji?

## ART INITIATION

- 1) Chiloweleni mu study, mwayamba kulandira ma ARV?

### OYAMBA MANKHWALA

- 2) Kodi zinatenga nthawi yaitali bwanji musanayambe kumwa mankhwala a ARV? (masabata angapo, miyezi ingapo?) Kodi mukanayambira kuti? Kodi munayamba kumwa mankhwala mnsanga/mochedwa chifukwa chani?
- 3) Chiyambileni kulandira thandizo la ARV, kodi mukupitiliza kumwa mankhwala anu?
  - a) Mwapitako ulend wina kuchipatala kukalandira mankhwala ena a ma ARV? Mwakhala mukukumana ndi zovuta zina chifukwa chokumwa mankhwala ama ARV, kodi mavutowa mwawathetsa bwanji?

OSAYAMBA MANKHWALA

- 4) Mutayezetsa nkupezeka ndi kachilombo ka HIV, munayamba mwapitapo ku chipatala?
  - a) Munapita liti? (chaka)
  - b) Munapita chifukwa chani? (kuperekeza odwala wina kapena munadwala?; munapitila HIV kapena ku OPD)
  - c) Kodi simunayambe kumwa mankhwala a ma ARV nthawi imeneyi chifukwa chani?

**ART UPTAKTE**

- 1) Tikudziwa kuti kuyamba kumwa mankhwala a ARV kumavutirapo. Kodi mukuona kuti chovuta chachikulu pa kuyamba kumwa mankhwala ndi chani?
  - a) *Ganizirani anzanu aamuna mmudzi mwanu. Kodi mukuona kuti iwo angatchule chani ngati chovuta chachikulu pa kuyamba kumwa mankhwala a ART?*

OYAMBA MANKHWALA

- 2) Kodi kumwa mankhwala kwakhudza bwanji ntchito zanu za tsiku ndi tsiku? Mu njira yabwino kapena yobwerera mmbuyo?
- 3) Kodi kumwa mankhwala kwakhudza bwanji maubwenzi anu? Mu njira yabwino kapena yobwerera mmbuyo?
- 4) Kodi kumwa mankhwala a ARV kumaphweka mukabisa momwe mthupi mulili kwa anthu ena? Motani?

OSAYAMBA MANKHWALA

- 5) Kodi mukuganiza kuti kumwa ma ARV kungakhudze bwanji ntchito zanu za tsiku ndi tsiku? Mu njira yabwino kapena yobwerera mmbuyo?
- 6) Kodi mukuganiza kuti kumwa mankhwala a ma ARV kungakhudze bwanji maubwenzi anu? Mu njira yabwino kapena yobwerera mmbuyo?
- 7) Kodi kumwa mankhwala a ARV kungaphweke/kumaphweka kuti mukabisa momwe mthupi mulili kwa anthu ena? Motani?
- 8) Kodi chinthu chachiwiri chovuta kwambiri pa kuyamba kumwa mankhwala ndi chani?
  - a) Ganizirani amuna ena a mmudzi mwanu. Kodi mukuganiza kuti anganene kuti chovuta CHACHIWIRI pa kuyamba kumwa a ma ARV ndi chani mmudzi mwanu?

**SUGGESTIONS FOR ART SERVICES**

Zikomo chifukwa cha mayankho anu. Timafuna titakhazikitsa ndondomeko zokomera amuna mu dera lanu zokhudza thandizo la ma ARV. Tikumvetsetsa kuti amuna amakhala otangwanidwa ndipo amakumana ndi mavuto osiyana ndi amayi. Ndimafuna ndimve maganizo anu pa zofunika kuti tikonze bwino thandizoli maka kwa amuna mu dera lino.

- 1) Kodi mungandiuzeke njira yabwino kwambiri yomwe mukuganiza kuti thandizo la ma ARV lingamaperekedwere kwa inu, chipatala chitati chichitepo kanthu....
  - a) Kodi mungafune mudzipita nthawi zotani ku chipatala kukatenga mankhwala?
    - i) Tsiku la mu sabata, nthawi?
    - ii) Ndi chifukwa chani?
  - b) Kodi ndi malo ati omwe mungakonde kumakatengerako ARV?
    - i) Pa chipatala cha pafupi nanu, kutali nanu, kwina mu dela lino (MALO ATI KWENIKWENI) pakhomo panu
    - ii) Ndi chifukwa chani?
- 2) Ndimafuna ndinve za momwe mukunvera za kucheza konse tinali nako poyamba(Kumbutsani otenga nawo mbali zomwe anatchula-kuyimbilidwa lamya, uthenga wa pa lamya, kupitako okha, thandizo la pakhomo la ARV)
  - a) Chomwe munakondapo chinali chani?
    - i) Chifukwa?(Kuyendeledwa, kunva kuthandizidwa, osafunika kupita ku chipatala kukalandira ma AR olandilira pakhomo)
  - b) Chomwe simunaonde ndi chani? Zovuta zinali chani?
    - i) Chifukwa? (chitsanzo: kuvutika kusunga chinsinsi ndi owadziwa kapena mikumano,simukufuna kuyamba kumwa ma ARV pazifukwa zina)
  - c) Mukuganiza kuti zinthu zimennezi zakulimbikitsani kupeza thandizo la zaumoyo?
    - i) Ngati eya , chifukwa?
    - ii) Ngati ayi, chifukwa chani?
  - d) Kodi mukuona ngati zinthu zimenezi zingathandize anthu ena mu dela lanu ngati angakhale ndi HIV?

#### OYAMBA MANKHWALA

- 1) Kodi mukuona ngati zinthu zimenezi zinakuthandizani kulimbikitsika kuti muyambe komanso kupitiliza kumwa mankhwala a ma ARV?
  - a) Kodi mukuganiza kuti mukanatha kuyamba thandizo la ma ARV popanda zimenezi?

#### OSAYAMBA MANKHWALA

- 1) Kodi mukuganiza kuti zinthu zimenezi zinalephera kukuthandizani kuyamba/kukhala mankhwala a ma ARV?
  - a) Chifukwa?
- 2) Ngati mungathe kusintha chilichonse cha mikumano yomwe mwatchula,chingakhale chani?
  - a) Mtundu wa mkumano, muligo wa mkumano, muthu, malo,mitu yokambilana
- 3) Tikunvetsa kuti anthu ndife osiyana. Kuposa zomwe mwakumana nazo, pakadali pano mukukumanabe ndi mavuto okhudzana ndi kupeza thandizo la zaumoyo la HIV? (pali zinthu zina zomwe mumafunabe?)
  - a) Ndi zinthu ziti?
  - b) Mukuganiza kuti ndi njira yanji yabwino yothandiza kupeza zofunikazi?

- 1  
2  
3 4) Kodi pali maganizo ena omwe mukuona kuti angathandizepo kupatula omwe tachulawa  
4 (kukumbutsana, uphungu wapadera, kugawa mankhwala kumudzi) ndi chani? Mukuona kuti  
5 maganizo anuwa angatheke chifukwa chani?  
6  
7 5) Apa tikufunakumaliza kucheza kwathu, pali china chiwinjezera chomwe mungalankhulepo pa zomwe  
8 takambirana?  
9

10  
11 **STOP THE RECORDER AND MAKE SURE RECORDING IS SAVED.**  
12

13  
14  
15 ZIKOMO CHIFUKWA CHOTENGA NAWO MBALI MU KAFUKUFUKUYU. NDIMAFUNA  
16 NDIKULIMBIKITSANI KUTI MA ARV AKHOZA KUTHANDIZA INU KUKHALA MOYO  
17 WAUTALI NDINSO WATHANZI.  
18

19 *The following general education messages should be conveyed to all male and female participants:*  
20

- 21  
22 • Anthu onse omwe ayezetsa ndi kupezeka ndi kachilombo ka HIV akuyenera kuyamba kumwa  
23 mankhwala a ma ARV mwamsangamsanga kuti zipundulire thanzi lawo komanso apewe  
24 kupatsira ena kachilombo.  
25  
26 • Matenda oopsa akhoza kugwira munthu ngakhale amene chiwerengero cha asilikali a mnthupi ndi  
27 ochuluka (kuposera 500) posaonetsa zizindikiro zoyamba. Mankhwala a ma ARV amachepetsa  
28 chiopsezochi.  
29  
30 • Anthu omwe ayamba kumwa ma ARV ndipo akupitiliza moyo wawo onse osalekalekeza akhoza  
31 kukhala moyo wa thanzi ndi wautali chimodzimodzi anthu omwe alibe kachilombo ka HIV.  
32  
33 • Ngakhale simukumva kudwala, mankhwala a ARV ndi ofunikirabe kuti mukhale ndi thanzi moyo  
34 wanu onse.  
35  
36 • Makhwala a ma ARV amachepetsa mlingo wa tidzilombo mthupi mwanu kotero amachepetsa  
37 chiposezo chopatsira kachilombo kwa ena.  
38  
39 • Mankhwala omwe alipo pakadali pano a ma ARV ndiosavuta kumwa komanso sakhala ndi  
40 mavuto ambiri. Anthu ena amakhala ndi mavuto obwera kamba komwa mankhwala masabata  
41 oyambirira koma izi zimatha. Ngati zikupitilirabe pali mtundu wina wa mankhwala omwe akhoza  
42 kukupatsani.  
43  
44  
45  
46  
47

48 *Be careful not to give any specific medical advice but rather refer respondents back to the clinic to*  
49 *speak to a provider.*  
50  
51  
52  
53  
54  
55  
56  
57  
58  
59  
60

## 14.12. APPENDIX L: Personel CV's

**Kathryn L. Dovel**

Department of Medicine, Division of Infectious Diseases  
kdovel@mednet.ucla.edu

Email:

David Geffen School of Medicine at UCLA

Office: +1 (310) 825-7225

10833 Le Conte Ave 37-121 CHS

Fax: +1 (310) 825-3632

Los Angeles, CA 90095

**POSITIONS HELD**

- 2017- Adjunct Assistant Professor, Division of Infectious Disease  
Department of Medicine, David Geffen School of Medicine - UCLA
- 2017- Research Director - Partners in Hope  
Lilongwe, Malawi
- 2016-17 Postdoctoral Fellow in Global HIV Prevention Research  
David Geffen School of Medicine - UCLA, 2016
- 2012-15 International Programs Director - 31Bits International  
Gulu, Uganda

**EDUCATION**

- PhD Health and Behavioral Sciences - University of Colorado Denver, 2016  
*Outstanding CLAS Ph.D. Student for the University of Colorado Denver*  
*Outstanding Dissertation Award for the University of Colorado Denver*  
Dissertation: "Shifting Focus from Individuals to Institutions: The Role of Gendered Health Institutions on Men's use of HIV Services"
- MPH Community Health Sciences - UCLA, 2010  
*Certificate in Global Health*
- BA Sociology & Anthropology (dual major), minor in Biology - Vanguard University, 2007  
*Magna Cum Laude*

**HONORS AND AWARDS**

- 2019 5th place in the 2019 Department of Medicine Research Day poster competition, Department of Medicine, University of California Los Angeles
- 2019 Invited panelist, IAS 2019, Sticky and durable linkage: Latest evidence and new strategies
- 2019 Panel Chair, IAS Pre-Conference 2019, Men and HIV: What we know and what we don't know
- 2019 Top 5 abstracts at CROI, 2019

- 1  
2  
3 2019 Invited participant, Technical Consultation on HIV Linkage, International AIDS Society  
4  
5 2019 Invited participant, Differentiated Service Delivery Think Tank, Gates Foundation  
6  
7 2018 Joep Lange Award (best abstract at INTEREST, 2018)  
8  
9 2018 Female Global Scholar, The Women in Global Health Research Initiative (Weill Cornell  
10 Medicine, Cornell University)  
11  
12 2016 Outstanding Dissertation Award (UCDenver)  
13  
14 2016 Outstanding CLAS Ph.D. Student (UCDenver)  
15  
16 2012-16 Deans Travel Grant (UCDenver)  
17  
18 2007 Delta Kappa Honor Society (Vanguard University)  
19  
20 2007 Alpha Kappa Delta Honor Society (Vanguard University)  
21  
22 2007 Lambda Alpha Honor Society (Vanguard University)  
23  
24 2007 Anthropology Student of the Year (Vanguard University)

## EXTERNAL GRANTS

- 25 2019-2023 Principle Investigator, Bill and Melinda Gates Foundation. (001423) “Identifying Effective  
26 Linkage Strategies for HIVST (IDEaL)”  
27  
28 2019-2024 Principle Investigator, Fogarty International Center. International Research Scientist  
29 Development Award (K01), K01TW011484. “Innovative strategies to increase ART  
30 Initiation and viral suppression among HIV+ men in Malawi”.  
31  
32 2019-2020 Principle Investigator, Clinton Health Access Foundation. “The impact of facility HIV self-test  
33 scale up in Malawi: a mixed methods study”  
34  
35 2018-2021 Co-Investigator, The Conrad N. Hilton Foundation. Delivery of childhood development services  
36 as part of HIV treatment services in Malawi. Project implemented by UCLA and Partners in  
37 Hope.  
38  
39 2017-19 Principal Investigator, USAID. **Use of HIV self-test kits to increase identification of HIV-**  
40 **infected individuals and their partners: a Cluster Randomized Control Trial.** (sub-study  
41 within a large PEPFAR-USAID grant; PI: Risa Hoffman).  
42  
43 2017-19 Principle Investigator, Clinical Research Scholar, National Institutes of Health Loan  
44 Repayment Program.  
45  
46 2016-18 Co-Principle Investigator, USAID. Test and Start: Tracking Uptake and Retention in Care using  
47 Standard Registry Data. (sub-study within a large PEPFAR-USAID grant; PI: Risa Hoffman).  
48  
49 2015 Principal Investigator, 31Bits International. “Evaluating the impact of a couple’s livelihoods  
50 program on power dynamics and economic attainment among couples in northern Uganda.”  
51 Project implemented by 31Bits International.  
52  
53 2014-16 Principal Investigator, NIMH National Research Service Award Predoctoral Individual  
54 Fellowship, F31-MH103078-01A1, “Gender Disparities in High-Risk PITC: The Role of  
55 Policy on Provider Practices”, Impact Score: 14; Percentile: 2.0  
56  
57 2013-16 Principal Investigator, Stop AIDS Now!. “Evaluation of the ‘Quality HIV and reproductive  
58 maternal and neonatal health services for women and young women in Africa through good  
59  
60



clinical governance and community-driven accountability”’. Project implemented by the Clinton Health Access Initiative.

## INTERNAL GRANTS

- 2016-18 Principal Investigator, UCLA Center for AIDS Research Seed Grant, University of California Los Angeles, “The Gendered Dynamics of ART Uptake and Retention under Universal Treatment Policies. Examining trends and ART barriers in Central Malawi”
- 2014 Principal Investigator, Calvin L Wilson Scholarship, University of Colorado Denver, “Gender and the provision of HIV testing: Examining how models of care influence men’s use of testing services in southern Malawi”
- 2013-15 Principal Investigator, Dissertation Grant, University of Colorado Denver, “Gender Disparities in High-Risk PITC: The Role of Policy on Provider Practices”
- 2013-14 Principal Investigator, Robinson Durst Scholarship, University of Colorado Denver, “Gender disparities in high-risk PITC: Exploring the influence of feminized policy on provider practices in Malawi”
- 2009 Principal Investigator, Drabkin and Bixby International Scholarship, UCLA, “Evaluating barriers and facilitators of a nutrition program in the Bateyes of Dominican Republic”
- 2009 Principal Investigator, Global Health Grant, UCLA, “Evaluating a Nutrition Program in the Bateyes of Dominican Republic”

## PUBLICATIONS

\* represents MPH, PhD or medical students I mentored

- 2020 Cornell, Morna, Katherine Horton, Christopher Colvin, Andrew Medina-Marino, **Kathryn Dovel**. Raising the profile of men’s health: the role of the research community: Letter to the editor. *Lancet*. Ahead of Print.
- 2020 **Dovel, Kathryn**, Mike Nyirenda, Frackson Shaba\*, O. Agatha Offorjebe\*, Kelvin Balakasi, Brooke Nichols, Khumbo Phiri\*, Khumbo Ngona, Sundeep K Gupta, Risa Hoffman. “Facility-based HIV self-testing for outpatients dramatically increases HIV testing in Malawi: a cluster randomized trial.” *Lancet Global Health*. Ahead of print
- 2020 **Dovel, Kathryn**, Khumbo Phii, Misheck Mphande, Deborah Mindry, Esnart Sanudi, McDaphton Bellos, Risa Hoffman. Optimizing Test and Treat in Malawi: Health care worker perspectives on barriers and facilitators to ART initiation among healthy clients. *Global Health Action*. Ahead of Print.
- 2020 Hubbard, Julie, Khumbo Phiri\*, Corrina Moucheraud, Kaitlyn McBride, Ashley Bardon, Kelvin Balakasi, Eric Lungu, **Kathryn Dovel**, Gift Kakwesa, Risa Hoffman. A qualitative assessment of provider and client experiences with three- and six-month dispensing of antiretroviral therapy in Malawi. *Global Health: Science and Practice*. Ahead of Print.



- 1  
2  
3 2020 Hoffman, Risa M, Kelvin Balakasi, Ashley Bardon, Zumbe Siwale, Julie Hubbard, Gift  
4 Kakwesa, Mwiza Haambokoma, Thoko Kalua, Pedro Pisa, Crispin Moyo, **Kathryn Dovel**,  
5 Thembi Xulu, Ian Sanne, Matt Fox, Sydney Rosen. Eligibility for differentiated models of  
6 HIV treatment service delivery: an estimate from Malawi and Zambia. *AIDS*. 1;34(3):475-  
7 9.
- 8  
9  
10 2019 McBride, Kaitlyn, Julie Parent, Kondwani Mmanga, Mackenzie Chivwala, Mike H.  
11 Nyirenda, Alan Schooley, James B. Mwambene, **Kathryn Dovel**, Eric Lungu,  
12 Kelvin Balakasi, Risa M. Hoffman, Corrina Moucheraud. "ART Adherence Among  
13 Malawian Youth Enrolled in Teen Clubs: A Retrospective Chart Review." *AIDS*  
14 *Behav.* (2019): 1-5.
- 15  
16  
17 2019 Frackson Shaba\*, Ogechukwu Offorjebe\*, Phiri Khumbo, Lungu Eric, Kalande Pericles,  
18 Nyirenda Mike, Hoffman M Risa, Gupta Sundeep, **Dovel Kathryn**. Perceived  
19 Acceptability of a Facility-Based HIV Self-Test Intervention in Outpatient Waiting Spaces  
20 Among Adult Outpatients in Malawi: A Formative Study. *JAIDS*. 1;81(3):e92-4.
- 21 2019 Magaço Amílcar, **Dovel Kathryn**, Cataldo Fabian, Nhassengo Pedroso, Nuera Lucas,  
22 Tique José, Saide Mohamed, Couto Aleny, Mbofana Francisco, Gudo E Eduardo, Cuco  
23 Rosa Marlene, Chicumbe Sérgio. "Good health as a barrier and facilitator to ART  
24 initiation: a qualitative study in the era of Test and Treat in Mozambique." *Cult Health Sex.*  
25 *11:1-5*.
- 26  
27  
28 2018 Cornell M, **Dovel K**. Reaching key adolescent populations. *Cur Opinion HIV AIDS*.  
29 1;13(3):274-80.
- 30 2018 Sara, Yeatman, Stephanie Chamberlin\*, **Kathryn Dovel**. Women's (health) work: A  
31 population-based, cross-sectional study of gender differences in time spent seeking health  
32 care in Malawi. *PLoS ONE*. 13(12): e0209586
- 33  
34 2018 Nhassengo, Pedroso Fabian Cataldo, Amílcar Magaço, Risa Hoffman, Lucas Nuera, José  
35 Tique, Mohamed Saide, Aleny Couto, Francisco Mbofana, Eduardo Gudo, Rosa Marlene  
36 Cuco, Sérgio Chicumbe, **Kathryn Dovel**. "Barriers and facilitators to the uptake of  
37 universal treatment in Mozambique: a qualitative study on patient and provider  
38 perceptions." *PLoS ONE*. 13(12): e0205919
- 39  
40 2018 Hubbard, Julie, Gift Kakwesa, Mike Nyirenda, James Mwambeneb, Ashley Bardona,  
41 Kelvin Balakasi, **Kathryn Dovel**, Thokozani Kaluac, Risa Hoffman. Towards the third 90:  
42 improving viral load testing with a simple quality improvement program in health facilities  
43 in Malawi. *International Public Health*. Ahead of print.
- 44  
45 2018 **Dovel, Kathryn**, Frackson Shaba\*, Ogechukwu Offorjebe\*, Kelvin Balakasi, Khumbo  
46 Phiri\*, Brooke Nichols, Chi-Hong Tseng, Ashley Bardon, Khumbo Ngona, Risa Hoffman.  
47 "Evaluating the integration of HIV self-testing into low-resource health systems: study  
48 protocol for a cluster randomized trial from EQUIP Innovations" *Trials*. 19:498.
- 49  
50  
51 2018 Moucheraud, Corrina, Dennis Chasweka, Mike Nyirenda, Alan Schooley, **Kathryn Dovel**,  
52 Risa Hoffman. "A simple screening tool may help identify high-risk children for targeted  
53 HIV testing in Malawian inpatient wards." *JAIDS*. 79:352-7.
- 54  
55 2018 Cornell Morna, **Dovel Kathryn**. "Reaching key adolescent populations." *Current opinion*
- 56  
57  
58  
59  
60

1  
2  
3 *in HIV and AIDS*. 13(3):274-80.  
4  
5

- 6 2016 **Dovel, Kathryn**, Sara Yeatman, Joep Vanoosterhout, Adrienne Chan, Alfred Matengeni,  
7 Megan Landes, Richard Bedell, and Sumeet Sodhi. "Trends in ART Initiation among Men  
8 and Non-Pregnant/Non-Breastfeeding Women before and after Option B+ in Southern  
9 Malawi." *PLoS ONE*. (12): e0165025.  
10  
11 2016 Poulin, Michelle, **Kathryn Dovel** and Susan Watkins. "Men with money and the  
12 'vulnerable women' client category in an AIDS epidemic." *World Development*. 85; 16-30.  
13  
14 2016 **Dovel, Kathryn**, Susan Watkins, Sara Yeatman, and Michelle Poulin. "Prioritizing  
15 strategies to reduce AIDS-related mortality for men in sub-Saharan Africa: Author's reply."  
16 *AIDS*. 30(1); 158-9.  
17  
18 2015 **Dovel, Kathryn**, Sara Yeatman, Susan Watkins, and Michelle Poulin. "Men's heightened  
19 risk of AIDS-related death: the legacy of gendered HIV testing and treatment strategies."  
20 *AIDS*. 29; 1123-5.  
21  
22 2015 **Dovel, Kathryn** and Kallie Thomson. "Financial obligations and economic barriers to  
23 antiretroviral therapy experienced by HIV positive women participating in a job-creation  
24 program in northern Uganda." *Culture, Health, and Sexuality*. 18(6).  
25  
26 2015 Krueger, Patrick, **Kathryn Dovel** and Justin Denney. "Democracy and self-rated health  
27 across 67 countries: A multilevel analysis." *Social Science and Medicine*. 143; 137-44.  
28  
29 2013 Conroy, Amy, Sara Yeatman and **Kathryn Dovel**. "The social construction of HIV/AIDS  
30 during a time of evolving access to antiretroviral therapy in rural Malawi." *Culture, Health  
31 and Sexuality*. 15(8); 924-37.  
32  
33 2012 Yeatman, Sara, **Kathryn Dovel**, Amy Conroy and Hazel Namadingo. "The predictors of  
34 HIV treatment optimism and its relationship with sexual risk behavior among a population-  
35 based sample of young adults in southern Malawi." *AIDS Care*. 25(8);1018-25.

### 36 TECHNICAL MANUSCRIPTS

- 37 2019 Hopkins, John, Laura Pascoe, Dean Peacock and Kathryn Dovel. "Accelerating Men's HIV  
38 service delivery and uptake in Eastern and Southern Africa UNAIDS Literature Review,  
39 Eastern and Southern Africa Regional Focus." UNAIDS, Johannesburg, South Africa.  
40  
41 2018 Masina, Tobias, **Kathryn Dovel**, Reuben Mwenda on behalf of the Malawi Ministry of  
42 Health. "National Guidelines for HIV self-testing." Malawi Ministry of Health Lilongwe  
43 Malawi.  
44  
45 2017 Pascoe, Laura, Dean Peacock and **Kathryn Dovel**. "To Get to Zero, We Must Also Get to  
46 Men – UNAIDS Literature Review, Eastern and Southern Africa Regional Focus."  
47 UNAIDS, Geneva.  
48  
49 2016 Macharia, Faith, Job Akuno, Faith Wanji, Julius Nguku, **Kathryn Dovel**, Caroline Ngare,  
50 Fred Nyagah, and Daniel Mwisunji. "National Guidelines for Male Engagement in HIV  
51 Services." Kenya Ministry of Health. Nairobi, Kenya.  
52  
53 2016 **Kathryn Dovel**, James Mkandawire, Susan Watkins, Nancy Mulauzi and Sydney Rodney  
54 Lungu. "Evaluation of the Good Clinical Governance Project: improving HIV and  
55 reproductive health services in Lilongwe, Malawi." Stop AIDS Now!. Lilongwe, Malawi.  
56  
57  
58  
59  
60

## OTHER PUBLICATIONS

- 2019 Kathryn Dovel, Stephanie Chamberlin, Sara, Yeatman. Malawi's Health System Puts Women First. This Isn't Always a Good Thing. *The Conversation: Africa*. Published February 19, 2019. Found at <https://theconversation.com/malawis-health-system-puts-women-first-this-isnt-always-a-good-thing-111277>
- 2016 **Dovel, Kathryn**, Sara Yeatman, and Susan Watkins. **Dying from a treatable disease: HIV and the men we neglect.** *Huffington Post*. Published February 23, 2016. Found at [http://www.huffingtonpost.com/the-conversation-africa/dying-from-a-treatable-di\\_b\\_9295620.html](http://www.huffingtonpost.com/the-conversation-africa/dying-from-a-treatable-di_b_9295620.html)

## WORK IN PREPARATION

- Dovel, Kathryn**. "The gendered organization of HIV services and men's poor use of testing in southern Malawi: consequences of hegemonic masculinity within health institutions." (Revise & Resubmit, JIAS)
- Offorjebe , Ogechukwu\*, Frackson Shaba\*, Kelvin Balakasi, Mike Nyrienda, Risa Hoffman, **Kathryn Dovel**. "Partner-delivered HIV self-testing increases the perceived acceptability of index partner testing among HIV-positive clients in Malawi." (Revise & Resubmit, PLoS ONE)
- Dovel, Kathryn**, Kelvin Balakasi, Khumbo Phiri\*, Frackson Shaba\*, O. Agatha Offorjebe\*, Sundeep K Gupta, Vincent Wong, Eric Lungu, Brooke Nichols, Mike Nyirenda, Ngona K, Anteneh Worku, Risa Hoffman. "A randomized trial on index HIV self-testing for sexual partners of ART clients in Malawi." (Under Review)
- Nichols, Brooke; Offorjebe, O. Agatha; Cele, Refiloe; Shaba , Frackson ; Balakasi, Kelvin; Chivwara, Mackenzie; Hoffman, Risa; Long, Lawrence; Rosen, Sydney; **Dovel, Kathryn**. "Economic evaluation of facility-based HIV self-testing among adult outpatients in Malawi." (Under Review)
- Dovel, Kathryn**, Gladies Orobmi, Melanie Beagly\*, Kallie Thomson. "Including men without sidelining women: the feasibility of male involvement within resource-strained gender equality programs in sub Saharan Africa." (Under Review)
- Dovel, Kathryn** and Kallie Thomson. "Evaluating the impact of a couple's livelihoods program on power dynamics and economic attainment among couples in northern Uganda." (In preparation)
- Dovel, Kathryn**. "Men in global HIV policy: examining discourses of blame and vulnerability." (In preparation)

## SELECT PEER-REVIEWED PRESENTATIONS

- 2020 Moucheraud, Corrina, Samuel W. Lewis, Misheck Mphande, Ben Allan Banda, Hitler Sigauke, Paul Kawale, Aubrey Dkangoma, **Kathryn Dovel**, Alemayehu Amberbir, Agnes Moses, Sundeep Gupta, Risa M. Hoffman. Cervical cancer knowledge and attitudes among HIV-positive men in Malawi." Paper accepted for poster presentation. Conference on Retroviruses and Opportunistic Infections (CROI). Boston, Massachusetts, USA
- 2019 **Dovel, Kathryn**, Kelvin Balakasi, Khumbo Phiri\*, Frackson Shaba\*, O. Agatha Offorjebe\*, Sundeep K Gupta, Vincent Wong, Eric Lungu, Brooke Nichols, Mike Nyirenda, Ngona K, Anteneh Worku, Risa Hoffman. Index HIV self-testing among male partners in Malawi:

- 1  
2  
3 predictors of self-testing within a randomized controlled trial”. Paper accepted for poster  
4 presentation. International AIDS Society. Mexico City, Mexico  
5
- 6 2019 **Dovel Kathryn**, Salem Ejigu, Pericles Kalande, Evelyn Udedi, Chipawiru Mbalanga, Lauri  
7 Bruns, Thomas Coates. “Beyond the Caregiver: Diffusion of early childhood development  
8 knowledge and practices within the social networks of HIV-positive mothers in Malawi”.  
9 Paper accepted for poster discussion. International AIDS Society. Mexico City, Mexico  
10
- 11 2019 **Dovel, Kathryn**, Kelvin Balakasi, Khumbo Phiri\*, Frackson Shaba\*, O. Agatha Offorjebe\*,  
12 Sundeep K Gupta, Vincent Wong, Eric Lungu, Brooke Nichols, Mike Nyirenda, Ngona K,  
13 Anteneh Worku, Risa Hoffman. A randomized trial on index HIV self-testing for sexual  
14 partners of ART clients in Malawi.” Paper accepted for oral presentation. Conference on  
15 Retroviruses and Opportunistic Infections (CROI). Seattle, Washington, USA  
16
- 17 2019 Ogechukwu Offorjebe, **Kathryn Dovel**, Frackson Shaba, Kelvin Balakasi, Risa Hoffman,  
18 Sydney Rosen, Brooke Nichols, for the EQUIP Health team. Cost-effectiveness and national  
19 impact of index HIV self-testing in Malawi. Paper accepted for poster presentation.  
20 Conference on Retroviruses and Opportunistic Infections (CROI). Seattle, Washington, USA  
21
- 22 2018 **Dovel, Kathryn**, Mike Nyirenda, Frackson Shaba\*, Ogechukwu Offorjebe\*, Kelvin Balakasi,  
23 Brooke Nichols, Khumbo Phiri\*, Khumbo Ngona, Alan Schooley, Risa Hoffman on behalf of  
24 EQUIP Innovation for Health. “Facility-based HIV self-testing for outpatients dramatically  
25 increases HIV testing in Malawi: a cluster randomized trial.” Paper accepted for oral  
26 presentation. International AIDS Society. Amsterdam, Netherlands  
27
- 28 2018 Shaba, Frackson\*, Kelvin Balakasi, Ogechukwu Offorjebe\*, Mike Nyirenda, Risa Hoffman,  
29 **Kathryn Dovel** on behalf of EQUIP Innovation for Health. “Facility-based HIV self-testing in  
30 Malawi: an assessment of characteristics and concerns among clients who opt-out of testing.”  
31 Paper accepted for poster presentation. International AIDS Society. Amsterdam, Netherlands  
32
- 33 2018 **Dovel, Kathryn**, Mike Nyirenda, Frackson Shaba, Ogechukwu Offorjebe\*, Kelvin Balakasi,  
34 Brooke Nichols, Khumbo Phiri\*, Khumbo Ngona, Alan Schooley, Risa Hoffman on behalf of  
35 EQUIP Innovation for Health. “Facility-based HIV self-testing for outpatients dramatically  
36 increases HIV testing in Malawi: a cluster randomized trial.” Paper accepted for oral  
37 presentation. INTEREST. Kigali, Rwanda - awarded the Joep Lange INTEREST award  
38
- 39 2018 Offorjebe , Ogechukwu\*, Frackson Shaba, Kelvin Balakasi, Mike Nyrienda, Risa Hoffman,  
40 **Kathryn Dovel** on behalf of EQUIP Innovation for Health. “Partner-delivered HIV self-  
41 testing increases the perceived acceptability of index partner testing among HIV-positive  
42 clients in Malawi.” Paper accepted for mini-oral presentation. INTEREST. Kigali, Rwanda  
43
- 44 2018 Stephanie Chamberlin\*, Misheck Mphande, Pericles Kalande, **Kathryn Dovel** on behalf of  
45 EQUIP Innovation for Health. “Barriers and facilitators to consistent engagement in HIV care  
46 under Test and Treat in Malawi.” Paper accepted for poster presentation. INTEREST. Kigali,  
47 Rwanda  
48
- 49 2017 **Dovel Kathryn**, Khumbo Phiri\*, Alan Schooley, Misheck Mphande, Mackenzie Chivwara,  
50 Risa Hoffman. “Facility-level barriers to antiretroviral therapy experienced by men in  
51 Malawi.” Paper accepted for poster presentation. International AIDS Society. Paris, France  
52
- 53 2017 Misheck Mphande, Khumbo Phiri\*, Mackenzie Chivwara, Mike Nyirenda, Alan Schooley,  
54 Rachel Thomas, Risa Hoffman, **Kathryn Dovel**. “Examining Malawi’s Rollout of Universal  
55 Treatment: Policy Implementation and Provider Perceptions.” Paper accepted for poster  
56 presentation. International AIDS Society. Paris, France  
57  
58  
59  
60

- 1  
2  
3 2016 **Dovel, Kathryn.** “Factors influencing the implementation of provider-initiated testing and  
4 counseling (PITC) among STI clients in southern Malawi: A mixed methods study.” Paper  
5 accepted for poster presentation. International AIDS Society. Durbin, South Africa  
6  
7  
8 2016 Westerhof, Nienke, Dzowela M, **Kathryn Dovel**, E. Banda, J. Chikonda. “Community-driven  
9 accountability through advocacy committees: a vehicle for improving HIV and reproductive  
10 health services for women living with HIV.” Paper accepted for poster presentation.  
11 International AIDS Society. Durbin, South Africa  
12  
13 2016 **Dovel, Kathryn**, Patrick Krueger, Shari Dworkin. “Predictors of men’s use of HIV testing  
14 services in low-income countries: the role of masculinity.” Paper accepted for poster  
15 presentation. Population Association of America. Washington D.C.  
16  
17 2014 **Dovel, Kathryn.** “Gender in HIV Policy: Examining how gender shapes the dissemination of  
18 HIV policies in southern Malawi.” Paper accepted for roundtable presentation. American  
19 Public Health Association. New Orleans.  
20  
21 2014 **Dovel, Kathryn.** “Gendered care: examining how clinic experiences influence HIV testing  
22 decisions among STI patients in southern Malawi.” Paper accepted for oral presentation.  
23 National Women’s Studies Association, San Juan, Puerto Rico.  
24  
25 2013 **Dovel, Kathryn.** “HIV policies and their influence on men's use of care.” Paper accepted for oral  
26 presentation. International HIV Social Science and Humanities Conference, Paris, France.  
27  
28 2007 **Dovel, Kathryn.** “Social and structural impediments that limit proper healthcare in rural southern  
29 Kurdistan.” Paper accepted for oral presentation. The Anthropology and Sociology Research  
30 Conference, Santa Clara, CA.  
31

### 32 INVITED PRESENTATIONS

- 33 2019 “Index HIV Self-Testing in Malawi”. World Health Organization webinar  
34  
35 2019 “Men’s (lack of) access to the health system”. UNAIDS. Regional meeting on Accelerating  
36 Men’s HIV service delivery and uptake in Eastern and Southern Africa.  
37  
38 2019 “Index HIVST in Malawi: a Randomized Control Trial. World Health Organization. Webinar  
39  
40 2019 “*Reaching men and engaging them in HIV care – lessons from Malawi*”. Men and HIV forum.  
41 International AIDS Society. Mexico City, Mexico  
42  
43 2018 “The impact of HIV self-testing on HIV testing among outpatients in high burden facilities in  
44 Malawi: preliminary findings from a cluster randomized control trial” USAID Washington.  
45 Washington D.C  
46  
47 2017 “Who benefits from Test and Treat? Understanding gender dimensions of universal treatment  
48 policies and gender-specific barriers to care” Malawi Ministry of Health, HIV Treatment  
49 Technical Working Group. Lilongwe, Malawi.  
50  
51 2016 “Facility-based barriers to HIV testing among men in Malawi: a systems approach” Malawi  
52 Ministry of Health, HIV Treatment Technical Working Group. Lilongwe, Malawi.  
53  
54 2015 “Men’s heightened risk of AIDS-related death: the legacy of gendered HIV testing and  
55 treatment strategies” United Nations Meeting on Male Engagement. Geneva, Switzerland  
56  
57 2015 “Facility-based barriers to men’s use of HIV testing: recommendations for male engagement  
58 guidelines.” National AIDS Control Council Meeting for the Development of the Male  
59  
60



- 1  
2  
3 Engagement Guidelines. Nairobi, Kenya  
4  
5 2014 “Gendered care: examining who ‘does gender’ in clinical settings and its influence on HIV  
6 services for men in southern Malawi.” Health Working Group, UCLA. Los Angeles, CA  
7  
8 2013 “From questions to methods: mixed methods approach to disparities research.” Course in  
9 Qualitative Methods (Doctoral Students). University of Colorado Denver. Denver, C  
10  
11 2010 “Lost in translation: examples of why best-practice nutrition programs fail in rural Dominican  
12 Republic.” Drabkin and Bixby International Conference, UCLA. Los Angeles, CA  
13  
14  
15

## 16 RELEVANT EMPLOYMENT ACTIVITIES

- 17  
18 2015- Consultant for Mixed Methods, Invest in Knowledge, Zomba, Malawi  
19 Activities: Oversaw data analysis and write-up for studies implemented by Invest in  
20 Knowledge. I focused on qualitative and mixed methods analysis and write-up.  
21  
22 2009-10 Research Specialist, Korean Resource Center, Los Angeles, CA  
23 Activities: Managed data entry and data cleaning and led in data analysis and write-up of a  
24 study assessing use of non-communicable disease services among first- and second-generation  
25 Korean populations in Los Angeles.  
26  
27 2009 Program Evaluation Fellow, Bataye Relief Alliance, Santo Domingo, Dominican Republic  
28 Activities: Led the assessment of a nutritional program aimed to improve child health outcomes  
29 in Haitian populated bateyes in Dominican Republic. I led tool development, training  
30 enumerators, data analysis, and write-up  
31  
32 2007-08 Program Coordinator, Orange County Department of Public Health, Santa Ana, CA  
33 Activities: Conducted literature reviews and assisting in the development of interventions to  
34 address Alcohol and Drug abuse among young adults in Orange County. Assisted in the protocol  
35 development and implementation of interventions.  
36  
37

## 38 SERVICE

- 39 2019 Committee Member of the Men’s HIV Forum at the International AIDS Conference, Mexico City  
40  
41 2018- Member of the Malawi Ministry of Health HIV Self-Testing Guidelines Task Force  
42  
43 2017- Member of the Malawi Ministry of Health HIV Testing Services Technical Working Group  
44  
45 2017- Member of the EQUIP HIV Self-Testing Technical Working Group  
46  
47 2016- Member of the UNAIDS Working Group “Engaging men in solutions for the HIV epidemic: Health  
48 systems.”  
49  
50 2016- Member of the “Men and HIV Global Working Group”  
51  
52 2016 Reviewer for the APHA 2016 Annual Meeting & Expo  
53  
54 2012-13 Editor of the Health and Behavioral Sciences Peer-Reviewed Journal, University of  
55 Colorado, Denver  
56  
57 2011-12 Student Advisory Council Member, University of Colorado, Denver  
58  
59  
60

## COURSES TAUGHT

### Adjunct Professor

Social determinants of health in the context of HIV services in sub-Saharan Africa – Field Rotation Series (UCLA)

Health, Disease & Globalization: Foundations of Epidemiology (Vanguard University)

Human Sexuality (co-taught, Vanguard University)

Cultural Anthropology (Vanguard University)

Applied Anthropology (Vanguard University)

Qualitative Methods (Vanguard University)

### Teaching Assistant

AIDS and Other Sexually Transmitted Diseases (UCLA)

Global Health Issues (UCLA)

Social Determinants of Health (University of Colorado Denver)

Statistical Analysis (University of Colorado Denver)

### MENTORSHIP

University of California Los Angeles. David Geffen School of Medicine. Medical Student. Kate Coursey. “Examining characteristics of women who engage in an integrated Early Childhood Development and PMTCT program in Malawi: endline evaluation.” 2019-

University of California Los Angeles. David Geffen School of Medicine. Medical Student. “Provider acceptability of interventions to increase ART initiation among men who test HIV-positive through index HIV self-testing.” 2019-

University of California Los Angeles. David Geffen School of Medicine. Medical Student. Tijana Temelkowska. “Examining the successes and challenges of implementing an early childhood development intervention with HIV-positive women in Malawi: a process evaluation.” 2018-

University of California Los Angeles. Internal Medicine Residency, Global Health Track. Resident Physician. Marguerite Thorp. “Can a brief screening tool identify ART clients at risk of defaulting from treatment? a prospective study in Malawi.” 2018-

University of California Los Angeles. Internal Medicine Residency, Global Health Track. Resident Physician. Adrian Mayo. “Predictors of early ART retention among adults who initiated under Universal Treatment policies in Malawi.” 2018-

University of Colorado Denver. Health and Behavioral Sciences. Doctoral Student. Stephanie Chamberlin. “Exploring the association between education and ART retention in rural Malawi.” 2017-

University of California Los Angeles. Fogarty GloCal Fellow. Medical Student. Ogechukwu Offorjebe. “Examining the feasibility and acceptability of HIV self-test kits for index testing among HIV+ clients and their partners in Malawi: A mixed methods study.” 2017-18

College of Medicine, Malawi. MPH Student. Khumbo Phiri. “The role of lay cadre in ART initiation and retention under Test and Treat in Malawi.” 2017-18

1  
2  
3 Brandeis University. Elisa Morales, Becca Sliwosk, and Melanie Morris (capstone project). “Developing a  
4 funding proposal for Men-to-Men, a gender-transformation and income-generating program for men in  
5 northern Uganda.” 2015 (with 31Bits International)  
6  
7

8 Vanguard University. Medical Anthropology Honors Thesis. Joanna Takegami. “Barriers to Women’s use of  
9 Antiretroviral Therapy in Northern Uganda: Exploring the Role of Structural Violence.” 2011  
10  
11

## 12 **AD HOC REVIEWER**

13  
14 AIDS, JAIDS, JIAS, BMC Public Health, Global Health Action, Culture, Health and Sexuality  
15  
16

## 17 **PROFESSIONAL MEMBERSHIPS**

18 Member, American Public Health Association (APHA), Present

19 Member, American Sociology Association (ASA), Present

20 Member, American Anthropological Association (AAA), Present  
21  
22  
23  
24  
25  
26  
27  
28  
29  
30  
31  
32  
33  
34  
35  
36  
37  
38  
39  
40  
41  
42  
43  
44  
45  
46  
47  
48  
49  
50  
51  
52  
53  
54  
55  
56  
57  
58  
59  
60



OMB No. 0925-0001 and 0925-0002 (Rev. 10/15 Approved Through 10/31/2018)

**THOMAS J. COATES**

eRA COMMONS USER NAME (credential, e.g., agency login): TCOATS

POSITION TITLE: **Professor Emeritus, Division of Infectious Diseases, Department of Medicine  
UCLA David Geffen School of Medicine**EDUCATION/TRAINING (*Begin with baccalaureate or other initial professional education, such as nursing, include postdoctoral training and residency training if applicable. Add/delete rows as necessary.*)

| INSTITUTION AND LOCATION                        | DEGREE<br>(if applicable) | Completion Date<br>MM/YYYY<br>Y | FIELD OF STUDY           |
|-------------------------------------------------|---------------------------|---------------------------------|--------------------------|
| San Luis Rey College, San Luis Rey, California  | BA                        | 06/1968                         | Philosophy               |
| San Jose State University, San Jose, California | MA                        | 01/1971                         | Psychology               |
| Stanford University, Stanford, California       | PhD                       | 06/1977                         | Counseling<br>Psychology |

## A. Personal Statement

I am Director of the system-wide University of California Global Health Institute (founded in 2008) and was the Founding Director of the UCLA Center for World Health (founded in 2012) until 2018. In 1986 I co-founded the Center for AIDS Prevention Studies (CAPS) at UCSF and directed it from 1991 to 2003. I was also the founding Director of the UCSF AIDS Research Institute, leading it from 1996 to 2003.

I have substantial expertise in research on HIV prevention among heterosexual men and women in the HIV epidemic in sub-Saharan Africa and in the HIV testing and treatment trials in sub-Saharan Africa, especially Malawi through PEPFAR funding. As Distinguished Research Professor of Medicine, I continue with two NIH and two foundation grants focused in southern Africa. I also continue as a co-investigator on the UCLA-based Center for HIV Identification, Prevention and Treatment Studies (CHIPTS).

I have had extensive experience with large-scale, community-based, multi-site research and implementation projects spanning HIV prevention, care and treatment, and policy. I currently have funding to test and evaluate innovative strategies for bring men in South Africa into HIV testing and treatment, as well as for providing early childhood development training for HIV-infected mothers and their babies in Malawi through support from the Conrad N. Hilton Foundation. We are also in the first year of a 5-year NIH-funded grant to study pre-exposure prophylaxis for pregnant and post-partum women in South Africa.

## B. Positions and Honors

|    |                |                                                                                                                                                                   |
|----|----------------|-------------------------------------------------------------------------------------------------------------------------------------------------------------------|
| 1  |                |                                                                                                                                                                   |
| 2  |                |                                                                                                                                                                   |
| 3  | 1984 - 2003    | Member, Medical Attending Staff, UCSF Hospitals and Clinics                                                                                                       |
| 4  |                |                                                                                                                                                                   |
| 5  | 1990 - 2003    | Professor, Department of Medicine, UCSF                                                                                                                           |
| 6  |                |                                                                                                                                                                   |
| 7  | 1991 - 2003    | Director, Center for AIDS Prevention Studies, UCSF                                                                                                                |
| 8  |                |                                                                                                                                                                   |
| 9  | 1996 - 2003    | Director, AIDS Research Institute, UCSF                                                                                                                           |
| 10 | 2000           | Elected to the Institute of Medicine (now the National Academy of Medicine)                                                                                       |
| 11 | 2010 - 2014    | Member, Institute of Medicine Board on Global Health                                                                                                              |
| 12 |                |                                                                                                                                                                   |
| 13 | 2003 - 2006    | Professor Step VII, Division of Infectious Diseases, Department of Medicine, David Geffen School of Medicine, UCLA                                                |
| 14 |                |                                                                                                                                                                   |
| 15 | 2003 - Present | Joint Appointment, Department of Medicine, UCSF; Member, Executive Committee, UCLA AIDS Institute                                                                 |
| 16 |                |                                                                                                                                                                   |
| 17 |                |                                                                                                                                                                   |
| 18 | 2003 - 2011    | Director, UCLA Program in Global Health                                                                                                                           |
| 19 |                |                                                                                                                                                                   |
| 20 | 2004 - Present | Joint Appointment, Department of Epidemiology, UCLA School of Public Health                                                                                       |
| 21 |                |                                                                                                                                                                   |
| 22 | 2006 – 2009    | Professor Step IX, Division of Infectious Diseases, Department of Medicine, David Geffen School of Medicine, UCLA                                                 |
| 23 |                |                                                                                                                                                                   |
| 24 | 2006 - 2018    | Michael & Sue Steinberg Endowed Professor of Global AIDS Research, Division of Infectious Diseases, Department of Medicine, David Geffen School of Medicine, UCLA |
| 25 |                |                                                                                                                                                                   |
| 26 |                |                                                                                                                                                                   |
| 27 | 2006 - 2018    | Director, Global Capacity Building Core Center for HIV Identification, Prevention, and Treatment Services, UCLA Semel Neurosciences Institute                     |
| 28 |                |                                                                                                                                                                   |
| 29 |                |                                                                                                                                                                   |
| 30 | 2006 - 2018    | Associate Director for International and Policy Research UCLA AIDS Institute                                                                                      |
| 31 |                |                                                                                                                                                                   |
| 32 | 2009 - 2016    | Co-director, University of California Global Health Institute                                                                                                     |
| 33 |                |                                                                                                                                                                   |
| 34 | 2009 –2018     | Distinguished Professor, Division of Infectious Diseases, Department of Medicine, David Geffen School of Medicine, University of California, Los Angeles          |
| 35 |                |                                                                                                                                                                   |
| 36 | 2011 – 2018    | Director, UCLA Center for World Health at the David Geffen School of Medicine and UCLA Health                                                                     |
| 37 |                |                                                                                                                                                                   |
| 38 | 2016-Present   | Director, University of California Global Health Institute                                                                                                        |
| 39 |                |                                                                                                                                                                   |
| 40 | 2018-Present   | Distinguished Research Professor, Division of Infectious Diseases, UCLA David Geffen School of Medicine                                                           |
| 41 |                |                                                                                                                                                                   |

#### C. Contribution to Science

1. **Combination HIV Prevention including Pre-Exposure Prophylaxis:** I have written extensively and conducted research on combination HIV prevention for MSM in the United States and Latin America and with a variety of populations in sub-Saharan Africa. My writing and research have been influential in shaping thinking about combination prevention, and in demonstrating the importance of considering HIV prevention as a combination of factors, as opposed to any single kind of program.

Joseph Davey D, Bekker LG, Gorbach P, **Coates T**, Myer L. Delivering PrEP to pregnant and breastfeeding women in sub-Saharan africa: The implementation science frontier. AIDS. 2017 Jul 18. doi: 10.1097/QAD.0000000000001604. PubMed PMID: 28723709.

Richter L, Komárek A, Desmond C, Celentano D, Morin S, Sweat M, Chariyalertsak S, Chingono A, Gray G, Mbwambo J, **Coates T**; Reported physical and sexual abuse in childhood and adult HIV risk behaviour in three African countries: findings from Project Accept (HPTN-043). *AIDS and behavior*. 2014; 18(2):381-9. PMID: PMC3796176

**Coates TJ**; An expanded behavioral paradigm for prevention and treatment of HIV-1 infection. *Journal of acquired immune deficiency syndromes (1999)*. 2013; 63 Suppl 2:S179-82. PMID: PMC3943341

**Coates TJ**, Richter L, Caceres C. Behavioural strategies to reduce HIV transmission: how to make them work better. *Lancet*. 2008; 372(9639):669-84. PMID: PMC2702246

2. **HIV Counseling and Testing (HTC):** I have conducted many significant and influential studies in HTC, beginning first with observational studies of the effect of HTC on risk behavior among men who have sex with men (MSM) in San Francisco. I was Principal Investigator for the first randomized controlled trial of HTC in Eastern Africa and the Caribbean, examining the effect of HTC on individual males and females, as well as couples presenting for HTC in Kenya, Tanzania, and Trinidad and Tobago, and these results were reported in *The Lancet* in 2000. I was the Principal Investigator for Project Accept, a cluster randomized trial conducted in South Africa, Zimbabwe, Tanzania, and Thailand, and these results were reported in *Lancet Global Health* in 2015. I also was the Principal Investigator of a randomized trial at Mulago Hospital in Uganda examining the effect of short vs. elaborated counseling on males and females presenting for care, and these results were reported in *Lancet Global Health* in 2014.

**Coates TJ**, Kulich M, Celentano DD, Zelaya CE, Chariyalertsak S, Chingono A, Gray G, Mbwambo JK, Morin SF, Richter L, Sweat M, van Rooyen H, McGrath N, Fiamma A, Laeyendecker O, Piwowar-Manning E, Szekeres G, Donnell D, Eshleman SH; NIMH Project Accept (HPTN 043) study team; Effect of community-based voluntary counselling and testing on HIV incidence and social and behavioural outcomes (NIMH Project Accept; HPTN 043): a cluster-randomised trial. *The Lancet. Global Health*. 2014; 2(5):e267-77. PMID: PMC4131207

van Rooyen H1, McGrath N, Chirwodza A, Joseph P, Fiamma A, Gray G, Richter L, **Coates T**. Mobile VCT: reaching men and young people in urban and rural South African pilot studies (NIMH Project Accept, HPTN 043). *AIDS and behavior*. 2013; 17(9):2946-53. PMID: PMC3597746

Wanyenze RK, Kanya MR, Fatch R, Mayanja-Kizza H, Baveewo S, Szekeres G, Bangsberg DR, **Coates T**, Hahn JA; Abbreviated HIV counselling and testing and enhanced referral to care in Uganda: a factorial randomised controlled trial. *The Lancet. Global Health*. 2013; 1(3):e137-45. PMID: PMC4129546

Mhlongo S, Dietrich J, Otwombe KN, Robertson G, **Coates TJ**, Gray G. Factors associated with not testing for HIV and consistent condom use among men in Soweto, South Africa. *PloS one*. 2013; 8(5):e62637. PMID: PMC3656000

3. **Global Health:** I have contributed to the literature on global health, especially from the perspective of engaging multiple disciplinary perspectives to attend to a variety of global health issues around the world.

Debas HT, **Coates TJ**; The University of California Global Health Institute opportunities and challenges. Infectious disease clinics of North America. 2011; 25(3):499-509, vii. PubMed [journal]PMID: 21896355

Duber HC, **Coates TJ**, Szekeres G, Kaji AH, Lewis RJ; Is there an association between PEPFAR funding and improvement in national health indicators in Africa? A retrospective study. Journal of the International AIDS Society. 2010; 13:21. PMCID: PMC2895577

Maman S, Abler L, Parker L, Lane T, Chirowodza A, Ntongwisangu J, Srirak N, Modiba P, Murima O, Fritz K.A comparison of HIV stigma and discrimination in five international sites: the influence of care and treatment resources in high prevalence settings. Social science & medicine (1982). 2009; 68(12):2271-8. PMCID: PMC2696587

Collins C, Coates TJ, Szekeres G; Accountability in the global response to HIV: measuring progress, driving change. AIDS (London, England). 2008; 22 Suppl 2:S105-111. PMCID: PMC2879260

#### **Complete List of Published Work in MyBibliography:**

<http://www.ncbi.nlm.nih.gov/sites/myncbi/thomas.coates.1/bibliography/40839346/public/?sort=date&direction=descending>

D. Research Support

#### **Ongoing Research Support**

R01MH105534-01A1 (Coates) 07/07/15 – 04/30/20

NIH/NIMH

#### **Bringing South African Men into HIV Counseling and Testing (HCT) and Care**

The objective of this project is to provide evidence-based strategies to improve treatment of HIV+ men through a three-step process: (1) Testing a significant proportion of the population, (2) linkage to care, and (3) maintaining in care a significant proportion of HIV+ individuals to the point of viral suppression. My role is as the Principal Investigator.

UM1 AI068619 (El Sadr) 07/01/14 – 11/30/20

Family Health International

NIH-NIAID

#### **HIV Prevention Trials Network (HPTN) Leadership Group**

The goals of this project are: 1) to develop the HPTN research agenda; 2) to review SWG research plans; 3) to review and approve concept plans; 4) to oversee the discretionary fund; 5) to review and revise HPTN policies and procedures; and 6) to evaluate the performance of the HPTN. My role is as Chair of the Manuscript Review Committee

P30 MH058107 (Shoptaw) 03/01/2017-02/28/2022

NIMH/NIH

1  
2  
3 **Center for HIV Identification, Prevention, and Treatment Services**

4 This project is a P30 and provides center grant services to HIV investigators at UCLA. I am a Co-  
5 Investigator in this center.  
6

7  
8  
9 The Conrad N. Hilton Foundation

01/01/2018-12/31/2020

10 **Delivery of Childhood Development Services as Part of HIV Treatment Services in Malawi**

11 This grant supports the integration of early childhood development services within pre- and post-natal care  
12 for HIV+ mothers in Malawi.  
13  
14

15  
16 R01 MH116771-01A1

09/30/2018-09-29-2023

17 NIMH/NIH

18 **Evaluating the Prep-PP Cascade in HIV-negative Pregnant and Breastfeeding Women in South**  
19 **Africa.**

20 The goal of this project is to test innovative models for delivering PrEP to pregnant and breastfeeding  
21 women age 16 and above in South Africa.  
22

23 **Entertainment Industry Foundation-Charlize Theron Africa Outreach Project** 06/01/2018-  
24 05/30/2021  
25

26 The goal of this project is to create a Youth Leaders Scholarship Fund to support promising young South  
27 Africans to attend South African tertiary education institutions.  
28

29 Bill and Melinda Gates Foundation (Dovel)  
30 12/3/2023

12/4/2019-

31 **Identifying Effective Linkage Strategies for HIVST (IDEaL)**

32 This grant tests the effect of a staged intervention for ART initiation among men in Malawi, whereby  
33 additional interventions are added each month for individuals who have not yet initiated ART.  
34

35 **Completed Research Support**

36  
37 20150025 (Coates)

09/01/15 – 08/31/17

38 Conrad N. Hilton Foundation

39 **Delivery of Early Childhood Development Services as a Part of HIV Treatment Services in Malawi**

40 Pilot grant to assess the feasibility and acceptability, as well as initial outcomes, of supporting Option B+  
41 mothers in Malawi to increase their responsiveness to their children and have positive impacts on early  
42 childhood development (ECD).  
43  
44

45 P30 MH58107 (Rotheram-Borus)

02/01/07 - 01/31/17

46 NIH/NIMH

47 **Center for HIV Identification, Prevention, and Treatment Services (CHIPTS)**

48 The mission of the Center for HIV Identification, Prevention, and Treatment Services (CHIPTS) is to  
49 promote collaborative research and education on effective HIV detection, prevention, and treatment  
50 programs for HIV at the societal, community, provider, and individual levels. My role is as the Director  
51 for International Care.  
52  
53  
54  
55  
56  
57  
58  
59  
60

1  
2  
3  
4  
5  
6  
7  
8  
9  
10  
11  
12  
13  
14  
15  
16  
17  
18  
19  
20  
21  
22  
23  
24  
25  
26  
27  
28  
29  
30  
31  
32  
33  
34  
35  
36  
37  
38  
39  
40  
41  
42  
43  
44  
45  
46  
47  
48  
49  
50  
51  
52  
53  
54  
55  
56  
57  
58  
59  
60

For peer review only

# RISA MICHELLE HOFFMAN

## CURRICULUM VITAE

### PERSONAL HISTORY

David Geffen School of Medicine at UCLA  
 Division of Infectious Diseases  
 10833 Le Conte Ave 37-121 CHS  
 Los Angeles, CA 90095  
 rhoffman@mednet.ucla.edu  
 Tele: (310) 825-7225  
 Fax: (310) 825-3632

### EDUCATION

Stanford University 1994, BA  
 University of California Los Angeles 2000, MD  
 Harvard School of Public Health 2000, MPH  
 Internship 2000-2001: Harvard Combined Medicine/Pediatrics Residency Program  
 Residency 2001-2004: Harvard Combined Medicine/Pediatrics Residency Program  
 Fellowship Infectious Diseases: 2005-2008: University of California, Los Angeles

### LICENSURE

California, A85173, 01/31/2021

### BOARD CERTIFICATION/OTHER CERTIFICATION

2004 & 2014 American Board of Internal Medicine  
 2007 & 2017 American Board of Internal Medicine, Infectious Diseases  
 2005 Certification in Travel Medicine from the London School of Hygiene and Tropical Medicine

### PROFESSIONAL EXPERIENCE

#### *Present Position*

|              |                                                                                                             |
|--------------|-------------------------------------------------------------------------------------------------------------|
| 2016-present | Associate Clinical Professor, Division of Infectious Diseases, UCLA                                         |
| 2010-2016    | Assistant Clinical Professor, Division of Infectious Diseases, UCLA Medical Center, Los Angeles, California |
| 2008-2010    | Clinical Instructor, Division of Infectious Diseases, UCLA Medical Center, Los Angeles, California          |

#### *Previous Positions*

|           |                                                                                                                      |
|-----------|----------------------------------------------------------------------------------------------------------------------|
| 2005-2008 | Fellow in Infectious Diseases, UCLA Medical Center, Los Angeles, California                                          |
| 2001-2004 | Resident Physician, Internal Medicine, Brigham and Women's Hospital, Boston, Massachusetts                           |
| 2001-2004 | Resident Physician, Pediatrics, Boston Children's Hospital and Massachusetts General Hospital, Boston, Massachusetts |
| 2000-2001 | Intern, Internal Medicine, Brigham and Women's Hospital, Boston, Massachusetts                                       |
| 2000-2001 | Intern, Pediatrics, Boston Children's Hospital and Massachusetts General Hospital, Boston, Massachusetts             |



**PROFESSIONAL ACTIVITIES & MEMBERSHIPS**

|              |                                                                                                                                                                                                                                |
|--------------|--------------------------------------------------------------------------------------------------------------------------------------------------------------------------------------------------------------------------------|
| 2018-present | Interim Director, Global Health Education and Research Program, David Geffen School of Medicine at UCLA                                                                                                                        |
| 2016-present | Co-Director UCLA AIDS Institute/CFAR International Health Services and Policy Research Program Section                                                                                                                         |
| 2015-present | Associate Program Director, UCLA Infectious Diseases Fellowship Training Program                                                                                                                                               |
| 2013-present | Advisory Board Member for the University of California Global Health Institute GloCal Health Fellowship                                                                                                                        |
| 2009-present | Research Co-Director, Partners in Hope Malawi and UCLA Research Collaboration                                                                                                                                                  |
| 2009-present | Investigator, AIDS Clinical Trials Group (ACTG) and Maternal Child Adolescent Network (IMPAACT)                                                                                                                                |
| 2009-present | HIV Clinical Consultant, To Help Everyone Clinic in Los Angeles, California                                                                                                                                                    |
| 2009-present | Ad hoc Peer Reviewer (AIDS Care, International Journal of STD and AIDS, BMC Women's Health, American Society of Tropical Medicine and Hygiene, Journal of Infectious Diseases, International Health, JIAS)                     |
| 2007-present | Member, Infectious Diseases Society of America (IDSA)                                                                                                                                                                          |
| 2016-2018    | Committee Member, Antiretroviral Therapy Strategies (ARTs), AIDS Clinical Trials Group                                                                                                                                         |
| 2008-2016    | Founder/Program Director, Sustainable Nutrition for Orphans and Vulnerable Children in Malawi, Central Africa: Provides education on nutrition and sustainable food sources for families caring for orphans in northern Malawi |
| 2014-2016    | Committee Lead, Infectious Diseases Quality Improvement M&M Program                                                                                                                                                            |
| 2011-2016    | Committee Member, AIDS Clinical Trials Group <i>Women's Health Inter-network Scientific Committee (WHISC)</i>                                                                                                                  |
| 2007-2013    | Founder/Program Co-Director, UCLA resident physician elective training program in Malawi, Africa                                                                                                                               |
| 2010-2013    | Co-Director, UCLA Program in Global Health and Global Health Education Program for the David Geffen School of Medicine at UCLA                                                                                                 |
| 2008-2012    | Faculty for 'Multidisciplinary Approach to Global Health' elective course for first and second year medical students at UCLA                                                                                                   |
| 2007-2012    | Committee Member, American Society of Tropical Medicine and Hygiene Education Committee                                                                                                                                        |
| 2005-2012    | Advisory Board Member, UCLA Medicine/Pediatrics Residency Training Advisory Board                                                                                                                                              |
| 2005-2011    | Interviewer, UCLA Medicine/Pediatrics Residency Training Program                                                                                                                                                               |
| 2006-2008    | Faculty Group Leader, Problem Based Learning Microbiology Block for second year medical students at UCLA                                                                                                                       |
| 2006-2008    | Creator/Organizer, UCLA Infectious Diseases Core Curriculum Program                                                                                                                                                            |

**HONORS AND AWARDS**

|      |                                                                                    |
|------|------------------------------------------------------------------------------------|
| 2012 | David Geffen School of Medicine Award for Excellence in Education                  |
| 2011 | Nomination for the Consortium of Universities for Global Health Early Career Award |
| 2009 | Nomination for UCLA Faculty Teaching Award                                         |



1  
2  
3  
4  
5  
6  
7  
8  
9  
10  
11  
12  
13  
14  
15  
16  
17  
18  
19  
20  
21  
22  
23  
24  
25  
26  
27  
28  
29  
30  
31  
32  
33  
34  
35  
36  
37  
38  
39  
40  
41  
42  
43  
44  
45  
46  
47  
48  
49  
50  
51  
52  
53  
54  
55  
56  
57  
58  
59  
60

2007 Nomination for UCLA Fellow Teaching Award  
 2006 Nomination for UCLA Fellow Teaching Award  
 2000 Elected to the UCLA chapter of the Alpha Omega Alpha Honor Society  
 2000 Janet M. Glasgow Memorial Achievement Citation for Academic Achievement at the UCLA School of Medicine  
 2000 John M. Adams Award for Excellence in Pediatrics, UCLA School of Medicine  
 2000 Edith and Carl Lasky Memorial Award for Outstanding Research Achievement, UCLA School of Medicine  
 1999 Longmire Surgical Medal for outstanding performance in surgical clerkships, awarded by the Department of Surgery, UCLA School of Medicine  
 1999 Charles Wacker Summer Research Fellowship, UCLA School of Medicine  
 1994 Elected to the Stanford Chapter of Phi Beta Kappa  
 1994 Elected to the Stanford Cap and Gown Women's Honor Society  
 1994 Recipient of the Joshua Lederberg Award for Outstanding Academic Achievement in Human Biology

#### LECTURES AND PRESENTATIONS

“Management of Febrile Neutropenia” Presented as part of the UCLA Division of Infectious Diseases Core Curriculum Program. Los Angeles, California, November 2013

“Challenges and Successes of EQUIP Malawi” Presented at UCLA Infectious Diseases Grand Rounds. Los Angeles, California, April 2014

“Primary Care Issues in HIV Care” Presented at the UCLA Department of Medicine housestaff curriculum. Los Angeles, California, May 2014

“A Case of Multi-Class HIV Resistance” Presented at the UCLA HIV/Hepatitis C Case Conference Series, Los Angeles, California, May 2014

“Evidence Based Managed of Osteomyelitis” Presented at the UCLA Division of Infectious Diseases Case Conference Series, Los Angeles, California, June 2014

“Responding to Viral Load: A Primer for Malawi Clinical Mentors” Presented at a PEPFAR EQUIP Clinical Training Meeting in Malawi, Africa, January 2015

“Clinical Pearls in the Management of HIV/AIDS”. Presented at the UCLA Internal Medicine Resident Core Curriculum Conference Series, Los Angeles, California, February 2015

“Quality Improvement in ID Care at UCLA: Lessons Learned from M&M” Presented at the UCLA Division of Infectious Diseases Core Conference Series, Los Angeles, California, April 2015

1  
2  
3  
4  
5 “Health & Safety Overseas: An orientation for medical students” Presented at the UCLA Global  
6 Health Education Medical Student Orientation Program, Los Angeles, California, April 2015  
7

8  
9 “ID Mimics”. Presented at the UCLA ID Fellow Core Curriculum Series, Los Angeles, California,  
10 May 2015  
11

12  
13 “Quality Improvement on the Infectious Diseases Service: Transition of Care.” Presented at the UCLA  
14 Division of Infectious Diseases Case Conference, Los Angeles, California, June 2015  
15

16  
17 “Quality Improvement on the Infectious Diseases Service: Notes and Documentation.” Presented at the  
18 UCLA Division of Infectious Diseases Case Conference, Los Angeles, California, December 2015  
19

20  
21 “Quality Improvement on the Infectious Diseases Service: HIV Care”. Presented at the UCLA  
22 Division of Infectious Diseases Case Conference, Los Angeles, California, February 2016  
23

24  
25 “Multi-month scripting to achieve improved outcomes in EQUIP”. Presented at the EQUIP annual  
26 meeting, Johannesburg, South Africa March 2016  
27

28  
29  
30 “Clinical Management of HIV/AIDS for the Primary Care Resident”. Presented at the UCLA Internal  
31 Medicine Resident Core Curriculum Conference Series, Los Angeles, California, April 2016  
32

33  
34 “Update on Option B+ in Malawi”. Presented to the Women’s Health Committee of the AIDS Clinical  
35 Trials Group, Los Angeles, California, April 2016  
36

37  
38 EQUIP Malawi: A Partnership for HIV Care in Malawi. Presented at Harbor UCLA Infectious  
39 Diseases Grand Rounds, Los Angeles, California, July 2016  
40

41  
42 Speaker, Infectious Diseases Career Panel for Medical Students at the David Geffen School of  
43 Medicine. Los Angeles, September 2016  
44

45  
46 Systemwide Case Conference Faculty Discussant for the MultiCampus Infectious Diseases Fellowship  
47 Program. Presented at the VA Hospital, Los Angeles, California, December 2016  
48

49  
50 “Introduction to Global HIV Treatment in Resource Poor Settings,” Lecturer for the UCLA School of  
51 Public Health, February 2018, Los Angeles  
52

53  
54 UCLA Division of Infectious Diseases, Journal Club Faculty Discussant, MDR TB Treatment, March  
55 2018, Los Angeles  
56

1  
2  
3  
4  
5 Faculty Panelist. Global Health Career Night for the David Geffen School of Medicine. November  
6 2018, Los Angeles  
7

8  
9 West LA VA Internal Medicine Grand Rounds Speaker: “The Intersection of HIV and Non-  
10 Communicable Diseases in Resource-Limited Settings” April 2019, Los Angeles  
11

12  
13 “Qualitative Client and Provider Experiences with Multi-Dispensing for HIV in Malawi and Zambia”.  
14 Presented as part of the CQUIN Consortium. Webinar, April 2019  
15

16  
17 “Introduction to the Global Health Program”. Presented as part of the DGSOM Global Health  
18 Selective, September 2019, Los Angeles  
19

## 20 21 PUBLICATION/BIBLIOGRAPHY

### 22 23 RESEARCH PAPERS

#### 24 25 RESEARCH PAPERS (PEER REVIEWED)

26  
27 **Hoffman RM**, Umeh OC, Garris C, Givens N, Currier JS. Evaluation of Sex Differences of  
28 Fosamprenavir (With and Without Ritonavir) in HIV-infected Men and Women. *HIV Clin Trials*.  
29 2007;8(6):371-380.  
30

31  
32  
33 **Hoffman RM**, AboulHosn J, Child JS, Pegues DA. Bartonella Endocarditis in Complex Congenital  
34 Heart Disease. *Congenit Heart Dis*. 2007;2(1):79-84.  
35

36  
37 Black V, **Hoffman RM**, Sugar CA, Menon P, Venter FWD, Currier JS, Rees H. Safety and Efficacy  
38 of Initiating Highly Active Antiretroviral Therapy in an Integrated Antenatal and HIV Clinic in  
39 Johannesburg, South Africa. *J Acquir Immune Defic Syndr*. 2008;49(3):276-81. PMC2893046.  
40

41  
42 **Hoffman RM**, Black V, Technau K, van der Merwe KJ, Currier JS, Coovadia A, Chersich M. Effects  
43 of Highly Active Antiretroviral Therapy Duration and Regimen on Risk for Mother-to-Child  
44 Transmission of HIV in Johannesburg, South Africa. *J Acquir Immune Defic Syndr*. 2010;54(1):35-  
45 41. PMC2880466.  
46

47  
48 Pilotto JH, Velasque L, Khalili R, Ismerio R, Veloso VG, Grinsztejn B, Morgado MG, Watts DH,  
49 Currier JS, **Hoffman RM**. Maternal Outcomes after HAART for Prevention of Mother-to-Child  
50 Transmission in HIV-infected Women in Brazil. *Antivir Ther*. 2011;16(3):349-56. PMC3437753.  
51

52  
53 Hoffman RM, Jamieson BD, Bosch RJ, Currier JS, Kitchen CMR, Schmid I, Zhu Y, Bennett K,  
54 Mitsuyasu R. Baseline Immune Phenotypes and CD4+ T Lymphocyte Responses to Antiretroviral  
55  
56  
57  
58  
59

1  
2  
3 Therapy in Younger versus Older HIV-infected Individuals. *J Clin Immunol*. 2011;31(5):873-81.  
4 PMC3194061.  
5  
6

7 Van der Merwe J, Hoffman RM, Black V, Chersich M, Coovadia A, Rees H. Birth outcomes in South  
8 African Women Receiving Highly Active Antiretroviral Therapy: a Retrospective Observational  
9 Study. *J Int AIDS Soc*. 2011;14:42. PMC3163172.  
10

11 Mindry D, Wagner G, Lake JE, Smith A, Linnemayr S, Quinn M, **Hoffman RM**. Fertility Desires  
12 Among HIV-infected Men and Women in Los Angeles County: Client Needs and Provider  
13 Perspectives; *Matern Child Health J*. 2013 May;17(4):593-600. PMC N/A.  
14

15 Burke Z, Chen J, Conceicao C, **Hoffman R**, Miller L, Taela A, DeUgarte DA. Evaluation of  
16 Preoperative and Intraoperative RBC Transfusion Practices in Maputo Central Hospital, Mozambique.  
17 *Transfusion*. 2013 May 21. doi: 10.1111/trf.12252. PMC3751985.  
18

19 **Hoffman RM**, Leister E, Kacanek D, Shapiro DE, Read JS, Bryson Y, Currier JS. Biomarkers from  
20 late pregnancy to six weeks postpartum in HIV-infected women who continue versus discontinue  
21 antiretroviral therapy after delivery. *JAIDS*. 2013 May 8. PMC3868443.  
22

23 Jaganath D, Mulenga C, **Hoffman R**, Hamilton J, Boneh G. This is My Story: Participatory  
24 Performance for HIV and AIDS Education at the University of Malawi. *Health Education Research*.  
25 2013 Sep 18. PMC4155417.  
26

27 Kawale P, Mindry D, Stramotas S, Chilikh P, Phoya A, Henry K, Elashoff D, Jansen P, **Hoffman R**.  
28 Factors associated with desire for children among HIV-infected women and men: A quantitative and  
29 qualitative analysis from Malawi and implications for the delivery of safer conception counseling.  
30 *AIDS Care*. 2013 Jun;26(6). PMC3943633.  
31

- 32 1. Iroezi N, Mindry D, Kawale P, Chikowi G, Jansen P, **Hoffman R**. A qualitative analysis of the  
33 barriers and facilitators to receiving care in a prevention of mother-to-child program in Nkhoma,  
34 Malawi. *Afr J Reprod Health*. 2013 Dec;17(4). PMC4361063.  
35
- 36 2. Russell E, Mohammed T, Smeaton L, Jorowe B, MacLeod I, **Hoffman R**, Currier JS, Moyo S,  
37 Essex M, Lockman S. Immune activation markers in peripartum women in Botswana: association  
38 with feeding strategy and maternal morbidity. *PLoS One*. 2014 Mar 21. PMC3962339.  
39
- 40 3. Reddy D, Njala J, Stocker P, Schooley A, Flores M, Tseng C-H, Pfaff C, Jansen P, Mitsuyasu RT,  
41 **Hoffman RM**. High-risk human papillomavirus in HIV-infected women undergoing cervical  
42 cancer screening in Lilongwe, Malawi: A pilot study. *International Journal of STDS and AIDS*,  
43 2014 Jun 13. PMC4363075.  
44
- 45 4. Kamuyango A, Hirschhorn L, Wang W, Jansen P, **Hoffman R**. One-Year Outcomes of Women  
46 Started on Antiretroviral Therapy during Pregnancy before and after the Implementation of Option  
47 B+ in Malawi: A Retrospective Chart Review from Three Facilities. *World Journal of AIDS*. 2014  
48 Sept;4(3). PMC4356991.  
49
- 50 5. Shull H, Tymchuk C, Grogan T, Hamilton J, Friedman J, **Hoffman RM**. Evaluation of the UCLA  
51 Department of Medicine Malawi Global Health Clinical Elective: Lessons from the First Five  
52 Years. *Am J Trop Med Hyg*. 2014 Sep 15. PMC4228879.  
53  
54  
55  
56  
57  
58  
59  
60

- 1  
2  
3 6. Hoffman JC, Anton PA, Baldwin GC, Elliott J, Anisman-Posner D, Tanner K, Grogan T, Elashoff  
4 D, Sugar C, Yang OO, **Hoffman RM**. Seminal Plasma HIV-1 RNA Concentration is Strongly  
5 Associated with Altered Levels of Seminal Plasma Interferon Gamma, Interleukin-17, and  
6 Interleukin-5. *AIDS Res Hum Retroviruses*. 2014 Oct 2. PMC4208556.
- 7  
8  
9 7. Menon P, **Hoffman R**, Black V. Characteristics of HIV-infected women on antiretroviral therapy  
10 who develop preeclampsia in South Africa: A Case Series. *The Journal of Global Health*.  
11 2014;4(2). PMC N/A.
- 12  
13 8. Cheng Q, Engelage E, Grogan T, Currier JS, and **Hoffman RM**. Who provides primary care? A  
14 cross-sectional survey of HIV patients and providers in a Los Angeles clinic. *AIDS Clinical  
15 Research*. 27 Oct 2014;5(11). PMC4409003.
- 16  
17 9. Kawale P, Mindry D, Phoya A, Jansen P, **Hoffman RM**. Provider attitudes about childbearing and  
18 knowledge of safer conception at two HIV clinics in Malawi. *Reproductive Health*. 2015 Mar  
19 7;12(1):17. PMC4355153.
- 20  
21 10. Yeatman S, **Hoffman RM**, Chilungo A, Lungu S, Namadingo H, Chimwaza A, and Trinitapoli  
22 JA. Health-seeking behavior and symptoms associated with early HIV infection: Results from a  
23 population-based cohort in southern Malawi. *JAIDS*. 2015 May 1;69(1):126-30. PMC4422188.
- 24  
25 11. **Hoffman RM**, Jaycocks A, Vardavas V, Wagner G, Lake JE, Mindry D, Currier JS, Landovitz R.  
26 Benefits of PrEP as an adjunctive method of HIV prevention during attempted conception between  
27 HIV-uninfected women and HIV-infected male partners. *Journal of Infectious Diseases, J Infect  
28 Dis*. 2015 Jun 19. PMC4621256.
- 29  
30 12. Lake JE, **Hoffman RM**, Tseng CH, Wilhalme HM, Currier JS. Success of Standard Dose Vitamin  
31 D Supplementation in Treated HIV Infection. *Open Forum Infect Dis*. 2015 May 15;2(2).  
32 PMC4462892.
- 33  
34 13. Chipungu C, Veltman JA, Jansen P, Chiliko P, Lossa C, Namarika D, Benner B, **Hoffman RM**,  
35 Bristow CC, Klausner JD. Feasibility and Acceptability of Cryptococcal Antigen Screening and  
36 Prevalence of Cryptocococemia in Patients Attending a Resource-limited HIV/AIDS clinic in  
37 Malawi. *Journal of the International Association of Providers of AIDS Care, J Int Assoc Provid  
38 AIDS Care*. 2015 Jul 2. PMC N/A.
- 39  
40 14. Coelho L, Cardoso SW, Luz PM, **Hoffman RM**, Mendonca L, Veloso VG, Currier JS, Grinsztejn  
41 B, Lake JE. Vitamin D3 supplementation in HIV infection: effectiveness and associations with  
42 antiretroviral therapy. *Nutr J*. 2015 Aug 18: 14. PMC4538921.
- 43  
44 15. **Hoffman RM**, Lake JE, Wilhame H, Tseng CH, Currier JD. Vitamin D levels and markers of  
45 inflammation and metabolism in HIV-infected individuals on suppressive antiretroviral therapy.  
46 *AIDS Res and Human Retroviruses* 2016 March;32(3). PMC4779972.
- 47  
48 16. Herbst de Cortina S, Arora G, Wells T, **Hoffman RM**. Evaluation of a Structured Predeparture  
49 Orientation at the David Geffen School of Medicine's Global Health Education Programs. *Am J  
50 Trop Med Hyg*. 2016 Mar 2;94(3). PMC4775891.
- 51  
52  
53  
54  
55  
56  
57  
58  
59  
60

17. Jordan J, **Hoffman R**, Arora G, Coates W. Activated learning: providing structure in global health education at the David Geffen School of Medicine at the University of California, Los Angeles – a pilot study. *BMC Medical Education*. 2016 Feb 16. PMC4755030.
18. Wagner GJ, Linnemayr S, Ghosh-Dastidar B, Currier JD, **Hoffman R**, Schneider S. Supporting Treatment Adherence Readiness through Training (START) for patients with HIV on antiretroviral therapy: a study protocol for a randomized controlled trial. *Trials*. 2016 March 24;17(1). PMC4806419.
19. Arora G, Perkins K, **Hoffman RM**. Optimizing global health electives through partnerships: A pilot study of pediatric residents. *Academic Pediatrics*. 2015 Sept-Oct;15(5). PMC N/A.
20. Chien E, Phiri K, Schooley S, Chivwala M, Hamilton J, **Hoffman RM**. Successes and Challenges of HIV Mentoring in Malawi: The Mentee Perspective. *PLoS One*. 2016 Jun 18;11(6). PMC4924818.
21. Schooley A, Kamudumuli P, Vangala S, Tseng CH, Soko C, Parent J, Phiri K, Jahn A, Namarika D, **Hoffman RM**. CD4 Variability in Malawi: Implications for Use of a CD4 Threshold of 500 Cells/mm<sup>3</sup> Versus Universal Eligibility for Antiretroviral Therapy. *Open Forum Infectious Diseases*. 2016 Aug 29;3(3). PMC5047419.
22. Hemarajata P, Baghdadi JD, **Hoffman R**, Humphries RM. *Burkholderia pseudomallei*: Challenges for the Clinical Microbiology Laboratory. *J Clin Microbiol* 2016 Dec;54(12):2866-2873. PMC5121373.
23. Pfaff C, Scott V, **Hoffman R**, Mwangomba B. You can treat my HIV – But can you treat my blood pressure? Availability of integrated HIV and non-communicable disease care in northern Malawi. *Afr J Prim Health Care Fam Med*. 2017 Feb 15;9(1):e1-e8. PMC5320467.
24. Gibb J, Chitsulo J, Chipungu C, Chivwara M, Schooley A, **Hoffman RM**. Supporting Quality Data Systems: Lessons Learned from Early Implementation of Routine Viral Load Monitoring at a Large Clinic in Lilongwe, Malawi. *Clinical Research in HIV AIDS and Prevention*. 2017 Mar 14;2(4). PMC5502771
25. Arora G and **Hoffman RM**. Development of an HIV Postexposure Prophylaxis (PEP) Protocol for Trainees Engaging in Academic Global Health Experiences. *Acad Med*. 2017 Apr 25. PMC28445222.
26. **Hoffman RM**, Phiri K, Parent J, Grotts J, Elashoff D, Kawale P, Yeatman S, Currier JS, Schooley A. Factors associated with retention in Option B+ in Malawi: a case control study. *J Int AIDS Soc*. 2017 Apr 27;20(1):1-8. PMC28453243.
27. Currier JS, Britto P, **Hoffman RM**, Brummel S, Masheto G, Joao E, Santos B, Aurpibul L, Losso M, Pierre MF, Weinberg A, Gnanashanmugam D, Chakhtoura N, Klingman K, Browning R, Coletti A, Mofenson L, Shapiro D, Pilotto J. Randomized Trial of Stopping or Continuing ART among Postpartum Women with Pre-ART CD4  $\geq$  400 cells/mm<sup>3</sup> (PROMISE 1077HS). *PLoS One*. 2017 May 10;12(5):e0176009. PMC28489856.
28. **Hoffman R**, Bardon A, Rosen S, Fox M, Kalua T, Xulu T, Taylor A, Sanne I. Varying intervals of antiretroviral medication dispensing to improve outcomes for HIV patients (The INTERVAL



- Study): study protocol for a randomized controlled trial. *Trials*. 2017 Oct 13;18(1):476. PMC29029644.
29. Judson SD, LeBreton M, Fuller T, **Hoffman RM**, Njabo K, Brewer TF, Dibongue E, Diffo J, Kameni JF, Loul S, Nchinda GW, Njouom R, Nwobegahay J, Takuo JM, Torimiro JN, Wade A, Smith TB. Translating Predictions of Zoonotic Viruses for Policymakers. *Ecohealth*. 2017 Dec 11. PMC29230614.
30. Fatti G, Ngorima-Mabhena N, Chirowa F, Chirwa B, Takarinda K, Tafuma TA, Mahachi N, Chikodzore R, Nyadundu S, Ajayi CA, Mutasa-Apollo T, Mugurungi O, Mothibi E, **Hoffman RM**, Grimwood A. The effectiveness and cost-effectiveness of 3- vs. 6-monthly dispensing of antiretroviral treatment (ART) for stable HIV patients in community ART-refill groups in Zimbabwe: study protocol for a pragmatic, cluster-randomized trial. *Trials*. 2018 Jan 29;19(1):79. PMC29378662.
31. Caplan MR, Phiri K, Parent J, Phoya A, Schooley A, **Hoffman RM**. Provider Perspectives on Barriers to Reproductive Health Services for HIV-Infected Clients in Central Malawi. *Clinical Obstetrics, Gynecology and Reproductive Medicine*. 2018 Feb 12;4(1). PMC6391881.
32. Canan T, **Hoffman RM**, Schooley A, Boas Z, Schwab K, Kahn D, Shih R, Phiri K, Parent J, Banda BA, Chagoma R, Chipungu C, Pool K-L. Training Course in Focused Assessment with Sonography for HIV/TB in HIV Prevalent Medical Centers in Malawi. *Journal of Global Radiology*. 2018 March;4(1). PMC N/A.
33. Rough K, Seage GR, Williams PL, Hernandez-Diaz S, Huo Y, Chadwick EG, Currier JS, **Hoffman RM**, Barr E, Shapiro DE, Patel K; PHACS and the IMPAACT P1025 Study Teams. Birth Outcomes for Pregnant Women with HIV Using Tenofovir–Emtricitabine. *New England Journal of Medicine*. 2018 April 26;378(17):1593-1603. PMC5984044
34. Dovel K, Shaba F, Nyirenda M, Offorjebe OA, Balakasi K, Phiri K, Nichols B, Tseng C-H, Bardon A, Ngona K, **Hoffman R**. Evaluating the Integration of HIV Self-Testing Into Low-Resource Health Systems: Study Protocol for a Cluster-Randomized Control Trial from EQUIP Innovations. *Trials*. 2018 Sept 17;19(1). PMC6142354
35. Schwab K, **Hoffman RM**, Phiri L, Kahn D, Longwe L, Banda BA, Gama K, Chimombo M, Shih R, Schooley A, Pool K-L. Remote Training and Oversight of Sonography for Human Immunodeficiency Virus–Associated Tuberculosis in Malawi. *Journal of the American College of Radiology*. 2018 Sept 26. PMC6540803
36. Hubbard J, Kakwesa G, Nyirenda M, Mwambene J, Bardon A, Balakasi K, Dovel K, Kalua T, **Hoffman RM**. Towards the Third 90: Improving Viral Load Testing with a Simple Quality Improvement Program in Health Facilities in Malawi. *Int Health*. 2018 Nov 1. PMC Pending
37. Moucheraud C, Chasweka D, Nyirenda M, Schooley A, Dovel K, **Hoffman RM**. Simple Screening Tool to Help Identify High-Risk Children for Targeted HIV Testing in Malawian Inpatient Wards. *J Acquir Immune Def Syndr*. 2018 Nov 1; 79(3). PMC Pending
38. **Hoffman RM**, Brummel SS, Britto P, Pilotto JH, Masheto G, Aupibul L, Joao E, Purswani MU, Buschur S, Flore Pierre M, Coletti A, Chakhtoura N, Klingman KL, Currier JS for the 1077HS

- 1  
2  
3 PROMISE Team. Adverse Pregnancy Outcomes among Women who Conceive on Antiretroviral  
4 Therapy. *Clin Infect Dis* 2018 June 1. PMC6321847  
5
- 6  
7 39. Nhassengo P, Cataldo F, Magaco A, **Hoffman RM**, Nerua L, Saide M, Cuco R, Hoek R, Mbofana  
8 F, Couto A, Gudo E, Chicumbe S, Dovel K. Barriers and facilitators to the uptake of Test and  
9 Treat in Mozambique: a qualitative study on patient and provider perceptions. *PLOS One*. 2018  
10 Dec 26; 13(12). PMC6306230  
11
- 12 40. Magaço A, Dovel K, Cataldo F, Nhassengo P, **Hoffman RM**, Nerua L, Tique J, Saide M, Couto  
13 A, Mbofana F, Gudo E, Cuco R, Chicumbe S. 'Good health' as a barrier and facilitator to ART  
14 initiation: a qualitative study in the era of test-and-treat in Mozambique. *Culture, Health and*  
15 *Sexuality*. 2018. PMC Pending  
16
- 17 41. **Hoffman RM**, Konstantia A, Brummel S, Saidi F, Violari A, Dula D, Mave V, Fairlie L, Gerhard  
18 T, Kamateeka M, Chipato T, Chi B, Stranix-Chibanda L, Nematadzira T, Moodley D,  
19 Bhattacharya D, Gupta A, Coletti A, McIntyre JA, Klingman KL, Chakhtoura N, Shapiro DE,  
20 Folwer MG, Currier JS. Maternal health outcomes among HIV-infected breastfeeding women with  
21 high CD4 counts: results of a treatment strategy trial. *HIV Clinical Trials* 2018 Dec;19 (6).  
22 PMC6428202 [Available on 2019-12-01]  
23
- 24  
25 42. Murnane PM, Bacchetti P, Currier JS, Brummel S, Okochi H, Phung N, Louie A, Kuncze K,  
26 **Hoffman RM**, Nematadzira T, Soko DK, Owor M, Saidi F, Flynn PM, Fowler MG, Gandhi M.  
27 Tenofovir concentrations in hair strongly predict virologic suppression in breastfeeding women.  
28 *AIDS* 2019 Apr 22. [Epub ahead of print]. PMC Pending  
29
- 30  
31 43. Shaba F, Offorjebe OA, Phiri K, Lungu E, Kalande, P, Nyirenda M, Gupta S, **Hoffman RM**,  
32 Dovel K. Perceived acceptability of a facility-based HIV self-test intervention in outpatient  
33 waiting spaces among adult outpatients in Malawi: A formative study. *J Acquir Immune Defic*  
34 *Syndr*. 2019 Jul 1;81(3):e92-e94. PMC Pending  
35
- 36  
37 44. Weinberg A, Huo Y, Kacanek D, Patel K, Watts DH, Wara D, **Hoffman RM**, Klawitter J,  
38 Christians U; for IMPAACT P1025 Team. Markers of spontaneous preterm delivery in women  
39 living with HIV: relationship with protease inhibitors and Vitamin D. *J Acquir Immune Defic*  
40 *Syndr*. 2019 May 28. [Epub ahead of print]. PMC Pending  
41
- 42  
43 45. McBride K, Parent J, Mmanga K, Chivwala M, Nyirenda MH, Schooley A, Mwambene JB, Dovel  
44 K, Lungu E, Balakasi K, **Hoffman RM**, Moucheraud C. ART Adherence Among Malawian Youth  
45 Enrolled in Teen Clubs: A Retrospective Chart Review. *AIDS Behav*. 2019 July 10. PMC Pending  
46
- 47 46. Le C, Britto P, Brummel SS, **Hoffman RM**, Li JZ, Flynn PM, Taha TE, Coletti A, Fowler MG,  
48 Bosch RJ, Gandhi RT, Klingman KL, McIntyre JA, Currier JS. Time to Viral Rebound and Safety  
49 after Antiretroviral Treatment Interruption in Postpartum Women Compared to Men. *In Press*  
50 *AIDS* 2019, August 1. PMC Pending  
51  
52  
53  
54  
55  
56  
57  
58  
59



OMB No. 0925-0001 and 0925-0002 (Rev. 09/17 Approved Through 03/31/2020)

**MICHAL KULICH**

eRA COMMONS USER NAME (credential, e.g., agency login):

POSITION TITLE: Associate Professor of Statistics

EDUCATION/TRAINING (*Begin with baccalaureate or other initial professional education, such as nursing, include postdoctoral training and residency training if applicable. Add/delete rows as necessary.*)

| INSTITUTION AND LOCATION                     | DEGREE<br>(if applicable) | Completion Date<br>MM/YYYY | FIELD OF STUDY   |
|----------------------------------------------|---------------------------|----------------------------|------------------|
| Charles University, Prague                   | M.S.                      | 9/1991                     | Math. Statistics |
| Limburgs Universitair Centrum,<br>Diepenbeek | M.S.                      | 9/1992                     | Biostatistics    |
| University of Washington, Seattle            | M.S.                      | 9/1995                     | Biostatistics    |
| University of Washington, Seattle            | Ph.D.                     | 10/1997                    | Biostatistics    |

**A. Personal Statement**

I have an extensive past experience with design, conduct and analysis of clinical trials, especially community randomized trials, in the context of HIV prevention research. I served as the Lead Statistician for the Behavioral Working Group within the HPTN in 2000–2003 and as the Protocol Statistician and Steering Committee member for Project ACCEPT (HPTN043) in 2003-2013. I have been also participating in protocol review groups in the HPTN. I was involved in the design of HPTN043, development of data collection procedures, and development and application of data quality control measures. I am a coauthor of 7 research papers on methodology and results of HPTN043. Since 2015, I am a protocol statistician on another community-randomized trial, Zwakala Ndoda Study: Diagnosing, Linking and Maintaining Men in Antiretroviral Treatment in Vulindlela and Greater Edendale Area, KwaZulu-Natal. The current application builds on my past experience with HIV prevention trials.

**B. Positions and Honors****Professional Positions**

1  
2  
3 1998–2000 Dept. of Probability and Statistics, Charles University, Prague, Czech Rep., Assistant  
4 Professor  
5 2000–2003 Dept. of Biostatistics, University of Washington, Seattle, Research Assistant Professor  
6 2004–2009 Dept. of Probability and Statistics, Charles University, Prague, Czech Rep., Assistant  
7 Professor  
8 2010–2013 Dept. of Probability and Statistics, Charles University, Prague, Czech Rep., Associate  
9 Professor  
10 2014– Dept. of Probability and Statistics, Charles University, Prague, Czech  
11 Rep., Chair  
12  
13

### 14 Professional Memberships

15  
16 1995- Member, American Statistical Association  
17  
18 1998- Member, Czech Statistical Society  
19  
20 2004- Member, International Biometric Society  
21  
22 2005- Member, International Society for Clinical Biostatistics

### 23 Honors

24 1995 Donovan J. Thompson Award, University of Washington, Seattle, WA.  
25  
26 1997 Best Written Paper, International Biometric Society, Park City, UT.  
27  
28 2001 Bolzano Award, Bernard Bolzano Foundation, Prague, Czech Republic.  
29

## 30 C. Contributions to Science

### 31 Design and conduct of HIV prevention trials

32 I have an expertise in design, conduct and analysis of large randomized HIV prevention trials. I was a  
33 protocol statistician in Project ACCEPT (HPTN043), a community-randomized trial conducted in five  
34 African and Asian sites, with HIV incidence calculated from cross-sectional blood samples as the primary  
35 endpoint. I designed methods for obtaining population samples by household-probability sampling,  
36 participated in data verification, performed analyses and collaborated on publications.  
37  
38  
39

40 Genberg, B., **Kulich, M.**, Kawichai, S., Modiba, P., Chingono, A., Kilonzo, G., Richter, L.,  
41 Pettifor, A., Sweat, M. & Celentano, D. HIV risk behaviors in Sub-Saharan Africa and Northern  
42 Thailand: Baseline behavioral data from Project Accept. *Journal of AIDS* 2008, 49(3):309-319.  
43 PMID: 18845954  
44

45 Sweat, M., Morin, S., Celentano, D., Mulawa, M., Singh, B., Mbwambo, J., Kawichai, S.,  
46 Chingono, A., Khumalo-Sakutukwa, G., Gray, G., Richter, L., **Kulich, M.**, Sadowski, A., Coates,  
47 T., and the Project Accept study team. Community-based intervention to increase HIV testing  
48 and case detection in people aged 16-32 years in Tanzania, Zimbabwe, and Thailand (NIMH  
49 Project Accept, HPTN 043): a randomised study. *The Lancet Infectious Diseases* 2011, 11(7),  
50 525-532. PMID: 21546309  
51  
52  
53

54 Coates, T.J., **Kulich, M.**, Celentano, D.D., Zelaya, C.E., Chariyalertsak, S., Chingono, A., Gray, G.,  
55 Mbwambo, J.K.K., Morin, S.F., Richter, L., Sweat, M., van Rooyen, H., McGrath, N., Fiamma, A.,  
56  
57  
58  
59

1  
2  
3 Laeyendecker, O., Piwowar-Manning, E., Szekeres, G., Donnell, D., Eshleman, S.H. (2014) Effect of  
4 community-based voluntary counselling and testing on HIV incidence and social and behavioural  
5 outcomes (NIMH Project Accept; HPTN 043): A cluster-randomised trial. *The Lancet Global Health*  
6 2014, 2 (5), e267-e277. PMID: 25103167  
7

8  
9 Salazar-Austin, N., **Kulich, M.**, Chingono, A., Chariyalertsak, S., Srithanaviboonchai, K., Gray, G.,  
10 Richter, L., van Rooyen, H., Morin, S., Sweat, M., Mbwambo, J., Szekeres, G., Coates, T., Celentano, D.  
11 (2017) Age-Related Differences in Socio-Demographic and Behavioral Determinants of HIV Testing and  
12 Counseling in HPTN 043/NIMH Project Accept. *AIDS and Behavior* 2018, 22(2) 569-579. PMID:  
13 28589504  
14

### 15 16 17 **Methods for cross-sectional incidence estimation**

18 I participated in the development of laboratory and statistical methods for estimating HIV incidence from  
19 cross-sectional blood samples. These methods were needed for successful evaluation of the primary  
20 outcome in Project ACCEPT.  
21

22 Laeyendecker, O., Piwowar-Manning, E., Fiamma, A., **Kulich, M.**, Donnell, D., Bassuk, D., Mullis, C.  
23 E., Chin, C., Swanson, P., Hackett, Jr, J., Clarke, W., Marzinke, M., Szekeres, G., Gray, G., Richter, L.,  
24 Alexandre, M. W., Chariyalertsak, S., Chingono, A., Celentano, D. D., Morin, S. F., Sweat, M., Coates,  
25 T., Eshleman, S. H. Estimation of HIV Incidence in a Large, Community-Based, Randomized Clinical  
26 Trial: NIMH Project Accept (HIV Prevention Trials Network 043), *PLoS ONE* 2013, 8:7, e68349. PMID:  
27 23874597  
28

29 Laeyendecker, O., **Kulich, M.**, Donnell, D., Komárek, A., Omelka, M., Mullis, C. E., Szekeres, G.,  
30 Piwowar-Manning, E., Fiamma, A., Gray, R. H., Lutalo, T., Morrison, C. S., Salata, R. A., Chipato, T.,  
31 Celum, C., Kahle, E. M., Taha, T. E., Kumwenda, N. I., Karim, Q. A., Naranbhai, V., Lingappa, J. R.,  
32 Sweat, M. D., Coates, T., Eshleman, S. H. Development of Methods for Cross-Sectional HIV Incidence  
33 Estimation in a Large, Community Randomized Trial. *PLoS ONE* 2013, 8:11, e78818. PMID: 2423605  
34  
35

36 Fogel, J.M., Piwowar-Manning, E., Donohue, K., Cummings, V., Marzinke, M.A., Clarke, W., Breaud,  
37 A., Fiamma, A., Donnell, D., **Kulich, M.**, Mbwambo, J., Richter, L., Gray, G., Sweat, M., Coates, T.,  
38 Eshleman, S. Determination of HIV status in African adults with discordant HIV rapid tests. *Journal of*  
39 *Acquired Immune Deficiency Syndromes* 2015, 69, 430-438. PMID: 25835607  
40  
41

42 Fogel, J.M., Clarke, W., **Kulich, M.**, Piwowar-Manning, E., Breaud, A., Olson, M.T., Marzinke, M.A.,  
43 Laeyendecker O., Fiamma, A., Donnell, D., Mbwambo, J., Richter, L., Gray, G., Sweat, M., Coates, T.J.,  
44 Eshleman, S.H. Antiretroviral drug use in a cross-sectional population survey in Africa: NIMH Project  
45 Accept (HPTN 043). *Journal of Acquired Immune Deficiency Syndromes* 2017, 74, 158-165. PMID:  
46 27828875  
47  
48  
49  
50  
51  
52  
53  
54  
55  
56  
57  
58  
59  
60

# AUGUSTINE T CHOKO

**Institution:** Malawi Liverpool Wellcome Trust Clinical Research Programme

**General Medical Council (or equivalent) registration number** N/A

**Do you currently have personal medical malpractice insurance? (if so, name of insurer)**

N/A

**Project role**

Principal Investigator

## Qualifications

| Degree | Year | Subject                | Awarding Institution |
|--------|------|------------------------|----------------------|
| PhD    | 2018 | Epidemiology           | LSHTM                |
| MSc    | 2012 | Epidemiology           | LSHTM                |
| BSc    | 2009 | Statistics & Computing | University of Malawi |

## Positions held (last ten years)

| Start | End  | Organisation                          | Position title, brief description of responsibilities                                                                        |
|-------|------|---------------------------------------|------------------------------------------------------------------------------------------------------------------------------|
| 2020  | 2024 | Malawi Liverpool Wellcome Trust (MLW) | Wellcome Trust & National Institute for Health Research International Intermediate Fellow                                    |
| 2019  | 2020 | MLW                                   | Protocol Lead; leading design, implementation and write up of a complex primary health clinic randomized trial.              |
| 2015  | 2018 | MLW                                   | Wellcome Trust Fellow in Public Health and Tropical Medicine <ul style="list-style-type: none"> <li>▪ PhD student</li> </ul> |

2013 2015 MLW Research Assistant (Epidemiology)

- Data analysis and publication

2012 2013 MLW Trial Manager

- Leading implementation of a community-based cluster randomized trial (HIV/TB)

2009 2012 MLW Data Manager/Statistician

- Designing and administering study databases
- Preparing data for analysis and data analysis

**GCP training: course provider, date**

NIDA Clinical Trials Network, Obtained 11 November 2016, expires 2019

**Please list any institutions with which you are affiliated to**

Malawi Liverpool Wellcome Trust Clinical Research Programme, London School of Hygiene & Tropical Medicine

**Ethics training: details of training, course provider, date**

**Clinical trials experience: title of trial, role, dates (if multiple, restrict to most recent and most relevant)**

Secondary distribution of HIV self-tests through antenatal and HIV testing services: a pragmatic cluster-randomized trial (STAR-ANC); 2018-2019.

Partner-Provided Self-Testing and Linkage (PASTAL) adaptive multi-arm multi-stage cluster randomized trial; 2016-2017.

Intensified HIV / TB prevention linking home-based HIV testing, including the option of self-testing, with HIV care: a cluster-randomised trial in Blantyre, Malaw, Research Fellow, 2011-2015.

**Other professional experience relevant to role in project**

Experience in handling and analyzing large epidemiological datasets.

**Relevant recent publications (maximum 5)**

1. **Choko AT**, Corbett EL, Stallard N, Maheswaran H, Lepine A, Johnson CC, Sakala D, Kalua T, Kumwenda M, Hayes R, Fielding K. Effect of HIV self-testing alone or with additional

1  
2  
3 .....  
4 interventions including financial incentives on linkage to care or prevention among male  
5 partners of antenatal care attendees in Malawi: An adaptive multi-arm multi-stage cluster  
6 randomised trial. *PLoS Med* 2019 Jan 2;16(1):e1002719.

- 7 2. **Choko AT**, Fielding K, Stallard N, et al. Investigating interventions to increase uptake of HIV  
8 testing and linkage into care or prevention for male partners of pregnant women in antenatal  
9 clinics in Blantyre, Malawi: study protocol for a cluster randomised trial. *Trials*. 2017;18(1):349.
- 10 3. **Choko AT**, Kumwenda MK, Johnson CC, et al. Acceptability of woman-delivered HIV self-testing  
11 to the male partner, and additional interventions: a qualitative study of antenatal care  
12 participants in Malawi. *Journal of the International AIDS Society*. 2017;20(1):21610.
- 13 4. **Choko AT**, MacPherson P, Webb EL, et al. Uptake, Accuracy, Safety, and Linkage into Care over  
14 Two Years of Promoting Annual Self-Testing for HIV in Blantyre, Malawi: A Community-Based  
15 Prospective Study. *PLoS medicine*. 2015;12(9):e1001873.
- 16 5. **Choko AT**, Desmond N, Webb EL, et al. The uptake and accuracy of oral kits for HIV self-testing  
17 in high HIV prevalence setting: a cross-sectional feasibility study in Blantyre, Malawi. *PLoS*  
18 *medicine*. 2011;8(10):e1001102.  
19 .....  
20

# Khumbo Phiri Nyirenda

## CONTACTS

Partners in Hope

PO Box 302, Lilongwe.

Cell: 265882400721/ 265999 840 946

**Email: khumbophiri@gmail.com**

## ACADEMIC QUALIFICATIONS

- I. MPH, University of Malawi, College of medicine, anticipating graduation in 2020
- II. BSOC, Economics, University of Malawi, Chancellor College- February, 2006
- III. Malawi School Certificate of Education (MSCE) Phwezi Girls Sec School-June, 2000

## COURSES/ TRAININGS

- Qualitative research synthesis, university of cape town, faculty of health sciences February 2020
- Qualitative data analysis university of cape town, faculty of health sciences January 2020
- Biomedical Researchers and Staff modules (CITI program \_May 2016)
- Certificate of Attendance in Value chain analysis training by Ron Black from CNFA's farmer to farmer USAID funded program, Washington DC (February 23-27, 2009)
- Output marketing training in grain grading by CNFA/RUMARK facilitated by a North Carolina Agriculture Department officer, held at Natural Resources College (August 25 -28, 2009).
- Certificate of Attendance in a Leadership workshop facilitated by Engineers without Borders (October 26 – 28, 2009).
- Training of trainers course in Business management and technical knowledge by COMESA's ACTESA and IFDC in Lusaka, Zambia (September 6-15, 2010)

## WORK EXPERIENCE

### PARTNERS IN HOPE

**Position:** Implementation Science Manager

**Period:** September 2017 to date

Summary:

The Projects Research Coordinator is responsible for overseeing and implementing all research related activities at Partners in Hope (PIH) and in all program-supported sites. He/she is in charge of monitoring and evaluating projects and ensuring that PIH is accountable to research donors. This person works hand-in-hand with the University of California in Los Angeles (UCLA), Partners in Hope (PIH), the Ministry of Health (MoH) and other partners.

Responsibilities



## 1. Overseeing and implementing all research projects at Partners in Hope and all EQUIP-supported sites

### 2. Research applications, Reviews and Reports.

- Oversee applications for ethical review for the Malawi NHSRC and/or COMREC, including initial and renewal applications, as well as closeout of completed projects.
- Serve as the first line of direct communication with the NHSRC and/or COMREC to advocate for submitted applications.
- Work with UCLA, PIH, MoH and other partners to ensure all research is performed to the highest ethical standards and that data is securely managed.
- Make sure appropriate reporting is provided to the governing bodies (final reports, publications, etc.).
- Oversee submission of abstracts to research meetings.

### 3. Monitoring, Evaluation and Accountability to Donors

- Monitor all research projects and develop donor communications in collaboration with senior leadership, especially the M&E Team.
- Ensure timely production and submission of donor reports.
- Participate in development of strategies for expansion of research.
- Ensure continuous evaluation of projects and staff, including hiring and regular appraisals.

**Period:** December 2012 to March 2016

**Organization:** Partners in Hope

**Position:** Research coordinator

### Description

- Coordinates and administers research study associated activities. Assists in project planning and ensures that pre-established work scope, study protocol and regulatory (ethical review in Malawi and at UCLA) requirements are followed. Oversees and coordinates research staff. Develops and maintains record keeping systems and procedures. My job as Research Coordinator involves these main tasks
  - Assistance developing research proposals, data collection forms, and spreadsheets for organization of data. Develops and maintains record keeping systems and procedures.
  - Ensures the smooth and efficient day to day operation of research and data collection activities; acts as the primary administrative point of contact for EQUIP research staff.
  - Supervision of team of research assistants
  - Assistance with recruitment and coordination of research subjects as appropriate.
  - Supervision and assistance with quality control Data.
- Monitors the progress of research activities; develops and maintains records of research activities and prepares periodic and ad hoc reports as required by investigators, administrators and funding agencies(USAID quarterly reports) and regulatory bodies (NHSRC,UCLA,IRB)



- Assistance with preparing ethical review applications (HSRC) including frequent communication with NHSRC about status of pending applications.

## I. CARANA COOPERATION

**Position:** M&E/MIS Assistant

**Period:** November 2010–September 2011

### Description

Market Linkages Initiative was a project funded by **USAID** and implemented by ACDI/VOCA and CARANA Corporation. The two key objectives of the project are to strengthen and expand grain bulking systems and to integrate farmers to national and regional markets. My job as an M&E/MIS Specialist involved these main tasks:

- Assisting the M&E specialist in tracking MLI indicators, collecting and verifying information and maintaining PMP reports, work plans and reports(weekly, monthly updates, quarterly and annual) for Malawi activities
- Administering data collection tools to GBC/VACs and capacity building of grantees to keep relevant records and generate M&E reports as stipulated by the Grant agreement.
- Collating , analyzing and reporting in usable forms all data collected form GBC/VAC
- Supporting in the coming up of GIS map for MLI supported GBCs and its associated VACs in Malawi
- Administering M&E data collection tools and supervising M&E data collectors and ensure quality data collection
- Maintaining records of all source documents from grantees and other sources including filled questionnaires and interview reports
- Keeping records of field trip reports and monitor and updating field trip tracker for Malawi based MLI staff
- Undertaking case studies and documenting most significant change stories for selected GBCs/VACs/Farmers to monitor impacts of MLI work
- Maintaining an up to date filing system including project photos
- Ensuring that quality control procedures are met in terms of market data.
- Facilitating dissemination of market information to farmers on a timely and reliable basis using the E-platform
- Providing technical assistance on the E- platform to strategic partners
- Working alongside the new company and assisting/participating in development and deployment team to design and roll out a web to phone MIS platform

- Conducting weekly data checks on approved prices inside E-platform's price flagging module
- Manage a user, market and commodities database

## II. CNFA/RUMARK

**Position:** Monitoring and Evaluation Coordinator

**Period:** January 2009 to October 2010

CNFA/RUMARK implemented the Malawi Agrodealer Strengthening Program funded by AGRA. Its main objective was to develop rural-based, commercially-viable agrodealer networks and to work with agrodealers to improve the management, technical and financial capacity of their enterprises, thereby creating a rural market driven economic environment specifically designed to meet the unique needs of smallholder farmers. My position of as M&E coordinator involved the following tasks

- Monitoring progress of the project activities by doing surveys which included development of survey tools which mostly use participatory methods.
- Monitoring and evaluating the agrodealers performance in terms of sales as well as their financial status.
- Analysis of information on Agrodealer performance
- Verifying and identifying operational and potential agrodealers and recommending them for training to enable them get registered with CNFA
- Organizing promotional activities i.e. lottery competitions with the intention of creating customer database for surveys
- Playing a facilitating role in managing relationships between RUMARK and input supply companies to ensure cordial relationships and partnerships.
- Consolidating and analyzing results across CNFA's programs.
- Conducting training needs assessment for different categories of agrodealers to ensure equal treatment so that their specific needs are taken on board.
- Organizing the Agrodealers Annual Convention.
- Production of monthly as well as interim semi-annual reports for the Project
- Involved in advocating for policies which are conducive for agrodealers' business growth and sustainability through Private-public partnerships which involves working with various stakeholders including Government and civil society organizations.

## Research Abstracts

**Provider perspectives on barriers to reproductive health services for HIV-infected clients**

1  
2  
3 **in Central Malawi:** Khumbo Phiri, Margaret R Caplan , Julie Parent , Ann Phoya , Alan  
4 Schooley, and Risa M. Hoffman, Poster presentation at Interest 2017, Malawi

5  
6 **Barriers to ART uptake experienced by healthy clients in Malawi under Test and Treat:**  
7 Dovel, Kathryn, Khumbo Phiri, Alan Schooley, McDaphton Bellos, Esnart Sanudi, Denis  
8 Chasweka, Risa Hoffman, poster exhibition at the 9th IAS Conference on HIV Science (IAS  
9 2017, in Paris, France, 23-26 July 2017 and Interest 2017 in Malawi).

10  
11 **Facility-level barriers to antiretroviral therapy experienced by men in Malawi:** Dovel,  
12 Kathryn, Khumbo Phiri, Alan Schooley, Misheck Mphande, Mackenzie Chivwara, Risa  
13 Hoffman (poster presentation at interest 2017, Malawi)

14  
15 **Examining Malawi's Rollout of Universal Treatment: Policy Implementation and Provider**  
16 **Perceptions:** Misheck Mphande, Khumbo Phiri, Mackenzie Chivwara, Mike Nyirenda, Alan  
17 Schooley, Rachel Thomas, Risa Hoffman, Kathryn Dovel, (Poster presentation at IAS 2017 in  
18 Paris, France)

19  
20 **Low rates of successful defaulter tracing and re-engagement in care in Option B+ women**  
21 **in Central Malawi.** K. Phiri, J. Parent, T. Mulitswa, A. Schooley, R. Hoffman. Poster  
22 presentation at the International AIDS Society (IAS) conference (Durban, 2016).

23  
24 **The successes and Challenges of collaborating with Health Surveillance Assistants (HSAs)**  
25 **to trace Option B+ defaulters.** Khumbo Phiri Nyirenda, Julie Parent, Risa Hoffman, Alan  
26 Schooley, Temwanani Mulitswa

27  
28 **The Option B+ cascade: Characterizing uptake and retention in a USAID-PEPFAR**  
29 **program in rural Malawi.** Khumbo Phiri, Alan Schooley, Mackenzie Chivwala, Joseph Njala,  
30 Judy Currier, Andreas Jahn, Anteneh Worku, Perry Jansen, Risa Hoffman

31  
32 **Improvements and on-going challenges in exposed infants care at rural sites in Malawi.**  
33 Alan Schooley, Khumbo Phiri, Mackenzie Chivwala, Peter Chilikhoh, Antenneh worku, Risa  
34 Hoffman

35  
36 **Health Surveillance Assistants Can Successfully Perform Defaulter Tracing In Rural**  
37 **Malawi.** Mackenzie Chivwala, Khumbo Phiri, Risa Hoffman, Jimmy Chitsulo, Alan Schooley

38  
39 **Assessing the Potential Impact of Health Surveillance Assistants on HIV Care At The**  
40 **Facility And Community Level.** Mackenzie Chivwala, Khumbo Phiri, Weston Njamwaha,  
41 Peter Chilikhoh, Risa Hoffman, Alan Schooley

42  
43 **Mentee Perspectives on Factors Associated with a Successful HIV Mentorship Program**  
44 Mike Nyrienda, Chiulemu Kussen, Savior Mwandira, Khumbo Phiri, Chiukepo Longwe, Peter  
45 Chilikhoh, Risa Hoffman, Weston Njamwaha, Alan Schooley

46  
47 **Rapid Rollout of Viral Load Testing at Rural Health Facilities in Malawi.** Alan Schooley,  
48 Risa Hoffman, Mike Nyirenda, Savior Mwandira, Weston Njamwaha, Khumbo Phiri, Chifundo  
49 Chipungu, Mackenzie Chivwala, James Kandulu

50  
51 **Increased HIV testing after implementation of an innovative CD4 results reporting system**  
52 **in rural Malawi.** Alan Schooley, Mackenzie Chivwala, Reynier Ter Haar, George Mtonga,

1  
2  
3 Doreen Suwande, Kelvin Rambiki, Chiulemu Kussen, John Hamilton, Khumbo Phiri, Peter  
4 Chilikh, Risa Hoffman, Perry Jansen. Accepted for poster presentation at the 6th South African  
5 AIDS Conference, Durban, South Africa, 18-21 June 2013.  
6

7  
8 **Barriers to Adherence to ART in the Prevention of Mother-to-Child Transmission of HIV:  
9 Option B+ in Nkhoma, Malawi.** Paul Kawale, Alan Schooley, Virginia Tancioco, Danielle  
10 Wickman, Khumbo Phiri, Ella Bwanausi, Risa Hoffman. Accepted for poster presentation at the  
11 6th South African AIDS Conference, Durban, South Africa, 18-21 June 2013.  
12

### 13 MANUSCRIPTS ACCEPTED/PUBLISHED

14  
15  
16 **Successes and Challenges of HIV Mentoring in Malawi: The Mentee Perspective.** E. Chien,  
17 K. Phiri, A. Schooley, M. Chivwala, J. Hamilton, R. Hoffman. PLoS One. 2016 Jun;11(6).  
18

19 **CD4 variability in Malawian adults and implications for universal eligibility.** A.L. Schooley,  
20 P.S. Kamudumuli, S. Vangala, C.H. Tseng, C. Soko, J. Parent, K. Phiri, A. Jahn, D. Namarika,  
21 R. Hoffman. Open Forum Infect Dis. 2016 Aug;3(3).  
22

23  
24 **Provider perspectives on barriers to reproductive health services for HIV-infected clients  
25 in Central Malawi:** Margaret R Caplan, Khumbo Phiri, Julie Parent, Ann Phoya , Alan  
26 Schooley, and Risa M. Hoffman, PLOS ONE.  
27

28 **Factors Associated with Retention in Option B+ in Malawi: A Case Control Study:** Risa M.  
29 Hoffman, khumbo phiri, Julie parent, J Grotts D Elashoff, Paul Kawale, Sara Yeatman, J S  
30 Currier, A Schooley, JIAS.  
31

32  
33 **Training Course in Focused Assessment with Sonography for HIV/TB in HIV Prevalent  
34 Medical Centers in Malawi:** Timothy Canan, R Hoffman, Alan Schooley, Zachary Boas,  
35 Kristin Schwab, Daniel Kahn, Roger Shih, Khumbo Phiri, Julie Parent, Ben Allan Banda, Ronald  
36 Chagoma, Chifundo Chipungu. Kara-Lee Pool, Journal of Global Radiology  
37  
38

### 39 REFEREES

40 **Risa Hoffman (MD)**, Assistant Clinical Professor, David Gaffen school of medicine, UCLA,  
41 RHoffman@mednet.ucla.edu  
42

43  
44 **Rachel Sibande (PhD)**, Program Director, United Nations Foundation  
45 [rsibande@unfoundation.org](mailto:rsibande@unfoundation.org), +27670236497  
46

47 **Godfrey Chapola (PhD)**, Managing Director, RUMARK, P.O Box 31290, Lilongwe.  
48  
49 Cel: 0999792 070, [gchapola@rumark.org](mailto:gchapola@rumark.org)  
50  
51  
52  
53  
54  
55  
56  
57  
58  
59  
60

# Julie Hubbard

94 Culford Road London N1 4HN  
+44 7845 445338  
jhubbard@mednet.ucla.edu

## EDUCATION

London School of Hygiene and Tropical Medicine  
MSc Control of Infectious Diseases

Seattle Pacific University  
Bachelor of Arts: Sociology & Women's Studies  
Cum Laude GPA: 3.74  
Graduated July 2012

## PROFESSIONAL EXPERIENCE

University of California Los Angeles (UCLA), March 2017- Current  
Research Coordinator – 'INTERVAL' Study  
Lilongwe, Malawi and Lusaka, Zambia

- Supervise data collection by study personnel across 15 health facilities in southern and central Malawi. Coordinate field supervision to ensure data quality. Work with Principle Investigator (PI) to develop operating procedures for study implementation. Provide leadership and technical support to Zambia study team.

Harvest India USA, January 2016 – March 2017  
Director of Operations  
Costa Mesa, California and Andhra Pradesh, India

- Managed all aspects of operations to support, fundraise, and raise awareness for education and poverty alleviation initiatives amongst the Dalit, or 'untouchable', caste. Drafted and executed marketing campaigns to meet fundraising goals.

31 Bits International, December 2012 – February 2015  
Director of Operations  
Gulu, Northern Uganda

- Directed 160 beneficiaries and 6 Ugandan counselors in income generating projects. Developed and implemented in-depth monthly reports to evaluate income. Used data to identify hindrances to livelihood, such as domestic violence and HIV health complications. Organized necessary support through internal management or accessing external resources.

One Days Wages, March 2011- December 2012  
Chief Grant Analyst  
Seattle, Washington

- Generated extensive research on project proposals pertaining to the UN Millennium Development Goals and presented analyses for grant decisions.

Seattle Pacific University, September 2011- July 2012  
Research Assistant  
Seattle, Washington

- Edited, reviewed, and prepared research documents for Assistant Director of Women's Studies Program.

## PUBLICATIONS AND PRESENTATIONS

### *Publications*

Julie Hubbard, Gift Kakwesa, Mike Nyirenda, James Mwambene, Ashley Bardon, Kelvin Balakasi, Kathryn Dovel, Thokozani Kalua, Risa M Hoffman; Towards the third 90: improving viral load testing with a simple quality improvement program in health facilities in Malawi, *International Health*, , ihy083, <https://doi.org/10.1093/inthealth/ihy083>

Hubbard J, Moucheraud C, Lungu E, Bardon A, Balakasi K, Kakwesa G, Hoffman R ““I forget that I am a patient”: A qualitative assessment of 6 month dispensing of ART” (Under review)

Dovel K, Beagley M, Hubbard J, Orombi G, Thompson K “Including men without sidelining women: the feasibility of male involvement within a women’s empowerment program in northern Uganda” (Under review)

Dovel K, Hubbard J, Phiri K. “Gender and HIV services: The role of gender norms on ART initiation among men and women in Malawi.” (In preparation)

Peer reviewed poster presentations

“Gender and HIV services: The role of gender norms on ART initiation among men and women in Malawi.” Women in Global Health Scientific Conference. New York, New York. April 2018

“Towards the third 90: improving viral load testing with a simple quality improvement program in health facilities in Malawi” International Aids Society (IAS) Conference, Amsterdam, Netherlands. July 2018

### *Presentations*

“Innovations in differentiated service delivery: Six-month scripting lessons from Ethiopia, Malawi and Zambia” Colombia University Mailman School of Public Health. Webinar, April 2019

### **CERTIFICATIONS**

Confronting Gender Based Violence: Global Lessons with Case Studies from India Certification Course Coursera (Johns Hopkins University) - Online  
October 2015

- Epidemiology of gender-based violence, clinical care issues and how to provide psychosocial support for victims.

### **FELLOWSHIP**

Mennonite Central Committee

Community Development Associate, July-August 2011

- Rural and urban poverty field study in Recife, Brazil association under the direction of the Chair of the Sociology Department at Seattle Pacific University.

### **HONORS**

Seattle Pacific University Deans Scholar, 2008-2012

# BROOKE E. NICHOLS, PHD, MS

## OFFICE

### ADDRESS:

801 Massachusetts Avenue

Crosstown Center, 3<sup>rd</sup> Floor, Room 304

Boston, MA, USA 02118

+1 617 358 2403

Email: [brooken@bu.edu](mailto:brooken@bu.edu)

## ACADEMIC TRAINING:

|      |      |                                                                                                          |
|------|------|----------------------------------------------------------------------------------------------------------|
| 2015 | Ph.D | Department of Viroscience, Erasmus Medical Center (Rotterdam, the Netherlands)                           |
|      |      | <i>Mathematical Modeling and Cost-Effectiveness of Antiretroviral-Based HIV-1 Prevention Strategies.</i> |
| 2011 | M.S. | School of Public Health & Health Science, University of Massachusetts, Amherst                           |
|      |      | (Amherst, MA, USA), Epidemiology                                                                         |
| 2009 | B.A. | Mount Holyoke College (South Hadley, MA, USA), International Relations, <i>cum laude</i>                 |

## RESEARCH APPOINTMENTS:

|                |                     |                                                                                        |
|----------------|---------------------|----------------------------------------------------------------------------------------|
| 2019 – Present | Assistant Professor | Department of Global Health, School of Public Health,<br>Boston University, Boston, MA |
| 2018 – 2019    | Instructor          | Department of Global Health, School of Public Health,<br>Boston University, Boston, MA |
| 2017 – 2018    | Research Scientist  | Department of Global Health, School of Public Health,                                  |



|                |                      |  |                                                                                                                                                 |
|----------------|----------------------|--|-------------------------------------------------------------------------------------------------------------------------------------------------|
|                |                      |  | Boston University, Boston, MA                                                                                                                   |
|                |                      |  | Health Economics & Epidemiology Research Office, Wits                                                                                           |
| 2017 – Present | Principal Researcher |  | Health Consortium, Faculty of Health Sciences, University of Witwatersrand, Johannesburg, South Africa                                          |
| 2017 – Present | Researcher           |  | Joint Faculty Appointment, School of Clinical Medicine, Faculty of Health Sciences, University of the Witwatersrand, Johannesburg, South Africa |
| 2015 – 2016    | Postdoctoral Fellow  |  | Department of Viroscience, Erasmus Medical Center, Rotterdam, the Netherlands                                                                   |
| 2009 – 2010    | Research Assistant   |  | University of Massachusetts Amherst, School of Public Health & Health Sciences, Amherst, MA                                                     |

#### OTHER RESEARCH EXPERIENCE:

|             |                |  |                                                                                                                                          |
|-------------|----------------|--|------------------------------------------------------------------------------------------------------------------------------------------|
| 2012 – 2014 | Epidemiologist |  | Médecins Sans Frontières<br>Amsterdam, the Netherlands.<br>Project: <i>Spinal cord injury outcomes in Sri Lanka</i>                      |
| 2008 – 2009 | Researcher     |  | Ministry of Health and Social Services, Lüderitz, Namibia<br>Project: <i>Ecologic study on alcohol establishments and HIV prevalence</i> |

#### PROFESSIONAL APPOINTMENTS:

|             |                                     |  |                                        |
|-------------|-------------------------------------|--|----------------------------------------|
| 2008 – 2010 | Research Associate:<br>Epidemiology |  | Environ Corporation, Amherst, MA, USA. |
|-------------|-------------------------------------|--|----------------------------------------|

#### AWARDS AND HONOURS:

|      |  |  |                                                                                              |
|------|--|--|----------------------------------------------------------------------------------------------|
| 2019 |  |  | <b>Mary Lyon Award.</b> Mount Holyoke College Alumni Association. Award honors an alumna who |
|------|--|--|----------------------------------------------------------------------------------------------|



has demonstrated sustained achievement in her life and career consistent with the humane values

that Mary Lyon exemplified and inspired in others.

## CONFERENCE ORAL PRESENTATIONS:

\*Denotes graduate student or mentee

1. Popping S\*, Kall M, Stempher E, Versteegh L, **Nichols B**, van Sighem A, van de Vijver D, Boucher C, Verbon A, Delpech V. Country specific factors determine the quality of life among people with HIV in two western European countries.: 4<sup>th</sup> European Workshop on Health Living with HIV, Barcelona, Spain, September 2019.
2. Dovel K, Balakasi K, Shaba F, Offorjebe O, Gupta S, Wong S, Phiri K, Lungu E, Nyirenda M, **Nichols B**, Ngona K, Hoffman R. A randomized trial on index HIV self-testing for partners of ART clients in Malawi. Conference on Retroviruses and Opportunistic Infections (CROI), Seattle, USA, March 2019.
3. **Nichols BE**, Girdwood SJ\*, Crompton T, Stewart-Isherwood L, Berrie L, Chimhamhiwa D, Moyo C, Kuehnle J, Rosen S. Monitoring viral load for the last mile: what will it cost? AIDS, Amsterdam, Netherlands, July 2018.
4. Girdwood SJ\*, **Nichols BE**, Moyo C, Crompton T, Chimhamhiwa D, Rosen S. Optimizing access for the last mile: Geospatial cost model for point of care viral load instrument placement in Zambia. AIDS, Amsterdam, Netherlands, July 2018.
5. Dovel K, Nyirenda M, Shaba F, Offorjebe OA, Balakasi K, **Nichols BE**, Phiri K, Schooley A, Hoffman RM. Facility-based HIV self-testing for outpatients dramatically increases HIV testing in Malawi: a cluster randomized trial. AIDS, Amsterdam, Netherlands, July 2018.
6. **Nichols BE**, Hendrickson C, Sigwebela N, Moyo C, Fox MP, Rosen S. Prioritizing healthcare facilities for on-site mentorship to increase HIV treatment uptake: results from EQUIP. International AIDS Economics Network (IAEN) Conference, Amsterdam, Netherlands, July 2018.
7. van de Vijver DA, Richter A-K, Boucher CA, Gunsenheimer-Bartmeyer B, Kollan C, **Nichols BE**, Spinner C, Wasem J, Schewe K, Neumann A. Cost-effectiveness of pre-exposure prophylaxis in Germany (Kosteneffektivität der HIV-Präexpositionsprophylaxe in Deutschland). DGGÖ (German Society for health economics) Annual Meeting, Hamburg, Germany, March 2018.
8. van de Vijver DA, Richter A-K, Boucher CA, Gunsenheimer-Bartmeyer B, Kollan C, **Nichols BE**, Spinner C, Wasem J, Schewe K, Neumann A. Cost-effectiveness of pre-exposure prophylaxis for HIV-1 prevention in Germany. European AIDS Conference (EACS), Milan, Italy, October 2017.
9. Smit M, van Zoest RA, **Nichols BE**, Vaartjes I, Smit C, van der Valk M, van Sighem A, Wit FW, Hallett TB, Reiss P. Cardiovascular prevention policy in HIV: recommendations from a modeling study. Conference on Retroviruses and Opportunistic Infections (CROI), Seattle, WA. February 2017.
10. Popping S\*, **Nichols BE**, van Kampen JJA, Verbon A, Boucher CAB, van de Vijver DA. Intensive hepatitis C monitoring in previously HCV infected HIV-positive MSM is a cost saving method to

reduce the HCV epidemic. Netherlands Conference on HIV Pathogenesis, Epidemiology, Prevention and Treatment (NCHIV), Amsterdam, the Netherlands, November 2016.

11. **Nichols BE**, Boucher CAB, van der Valk M, Rijnders BJA, van de Vijver DA. PrEP is Only Cost-Effective Among MSM in the Netherlands When Used on Demand. Conference on Retroviruses and Opportunistic Infections (CROI), Boston, MA. February 2016.

12. **Nichols BE**, Boucher CAB, van der Valk M, Rijnders BJA, van de Vijver DA. On demand PrEP among MSM in the Netherlands: a cost-effective approach for preventing HIV-1 infections. Netherlands Conference on HIV

### Peer reviewed publications:

\*Authors contributed equally

\*\*Denotes graduate student or mentee

1. Dovel K, Nyirenda M, Shaba F, Offorjebe OA, Balakaksi K, **Nichols BE**, Cele R, Phiri K, Wong V, Gupta S, Hoffman RM. Effect of facility-based HIV self-testing on uptake of testing among adult outpatients in Malawi: a cluster-randomized trial. *The Lancet Global Health. In press.*
2. van Vliet MM\*\*, Hendrickson C\*\*, **Nichols BE**, Boucher CAB, Peters RPH, Polis CB, van de Vijver DAMC. Epidemiological impact and cost-effectiveness of long-acting pre-exposure prophylaxis combined with injectable contraceptives for HIV prevention in South Africa: a modelling study. *JIAS.* 2019, 22:e25427.
3. Long, L., Kuchukhidze, S., Pascoe, S., **Nichols, B.**, Cele R., Govathson, C., Flynn, D., Rosen, S. Differentiated Models of Service Delivery for Antiretroviral Treatment of HIV in sub-Saharan Africa: A Rapid Review Protocol. *Systematic Reviews.* 2019, 8:314.
4. Masuku S\*\*, Berhanu R, van Rensburg C, Ndjeka N, Rosen S, Long L, Evans D, **Nichols BE.** The costs of managing multi drug-resistant tuberculosis in South Africa: an economic evaluation of moving to a short-course treatment regimen containing bedaquiline. *International Journal of Tuberculosis and Lung Disease. In press.*
5. Hendrickson C\*\*, Long L\*, van de Vijver DA, Boucher CA, O'Bra H, Claassen CW, Njelesani M, Moyo C, Mumba DB, Subedar H, Mulenga L, Rosen S, **Nichols BE.** Novel metric for evaluating PrEP program effectiveness in real-world settings. *Lancet HIV. In press.*
6. Girdwood SJ\*\*, **Nichols BE**, Moyo C, Crompton T, Chimhamhiwa D, Rosen S. Optimizing access for the last mile: Geospatial cost model for point of care viral load instrument placement. *PLoS ONE.* 14(8):e0221586.
7. **Nichols BE**, Girdwood SJ\*\*, Crompton T, Stewart-Isherwood L, Berrie L, Chimhamhiwa D, Moyo C, Kuehnle J, Stevens W, Rosen S. Monitoring viral load for the last mile: what will it cost? *JIAS.* 2019, 22:e25337.
8. Popping S\*\*, **Nichols BE**, van Kampen JJA, Verbon A, Boucher CAB, van de Vijver DA. Targeted HCV core antigen monitoring among HIV-positive men-who-have-sex-with-men is cost-saving. *Journal of Virus Eradication.* 2019; 5:179-190.

- 1
- 2
- 3
- 4 9. **Nichols BE**, Girdwood SJ\*\*, Shibemba A, Sikota S, Gill C, Mwananyanda L, Scott L, Noble L, Carmona S, Rosen S, Stevens W. Cost and impact of dried blood spot versus plasma separation card for viral load testing in resource limited settings. *Clinical Infectious Diseases*. Advance article: 10.1093/cid/ciz338.
- 8
- 9 10. van de Vijver DA, Richter A-K, Boucher CA, Gusenheimer-Bartmeyer B, Kollan C, **Nichols BE**, Spinner CD, Wasem J, Schewe K, Neumann A. Cost-effectiveness and budget impact of generic pre-exposure prophylaxis for HIV-1 prevention in Germany. *Eurosurveillance*. 2019 Feb; 24(7).
- 12
- 13 11. Popping S\*\*, Hülligie SJ, Boerekamps A, Rijnders BJA, de Knecht RJ, Rockstroh JK, Verbon A, Boucher CAB, **Nichols BE**, van de Vijver DA. Early treatment of acute HCV infection is cost-effective in HIV-infected men-who-have-sex-with-men. *PLoS One*, 2019. 14(1):e0210179.
- 16
- 17 12. **Nichols BE**, Girdwood SJ\*\*, Crompton T, Stewart-Isherwood L, Berrie L, Chimhamhiwa D, Moyo C, Kuehne J, Stevens W, Rosen S. Impact of a borderless sample transport network for scaling up viral load monitoring: results of a geospatial optimization model for Zambia. *JLAS*. 2018, 21:e25206.
- 21
- 22 13. Dovel K, Shaba F, Nyirenda M, Ogechukwu AO, Balakasi K, Phiri K, **Nichols BE**, Tseng C-H, Bardon A, Namachapa KN, Hoffman RM. Evaluating the integration of HIV self-testing into low-resource health systems: a study protocol for a cluster randomized control trial from EQUIP Innovations. *Trials*, 2018. 19:498.
- 26
- 27 14. Phillips AN, Cambiano V, Nakagawa F, Revill P, Jordan MR, Hallett TB, Doherty M, De Luca A, Lundgren JD, Mhangara M, Apollo T, Mellors J, **Nichols B**, Parikh U, Pillay D, Rinke de Wit T, Sigaloff K, Havlir D, Kuritzkes DR, Pozniak A, van de Vijver D, Vitoria M, Wainberg MA, Raizes E, Bertagnolio S, Working Group on Modelling Potential Responses to High Levels of Pre-ART Drug Resistance in Sub-Saharan Africa. Cost-effectiveness of public-health policy options in the presence of pretreatment NNRTI drug resistance in sub-Saharan: a modelling study. *Lancet HIV*, 2018. 5(3):e146-e154.
- 33
- 34 15. Smit M, van Zoest RA, **Nichols BE**, Vaartjes I, Smit C, van der Valk M, van Sighem A, Wit FW, Hallett TB, Reiss P; Netherlands ATHENA observational HIV cohort. Cardiovascular disease prevention policy in HIV: recommendations from a modelling study. *Clinical Infectious Diseases*, 2018. 66(5):743-750.
- 38
- 39 16. Luiken GPM, Joore IK, Taselaar A, Schuit SCE, Geerlings SE, Govers A, Rood PPM, Prins JM, **Nichols BE**, Verbon A, de Vries-Sluijs TEMS. Non-targeted HIV screening in emergency departments in the Netherlands. *The Netherlands Journal of Medicine*, 2017. 75(9):386-393.
- 42
- 43 17. **Nichols BE**, Boucher CAB, van der Valk M, Rijnders BJA, van de Vijver DAMC. Cost-effectiveness analysis of pre-exposure prophylaxis for HIV-1 prevention in the Netherlands: a mathematical modelling study. *Lancet Infectious Diseases*, 2016. 16(12):1423-1429.
- 46
- 47 18. **Working Group on Modelling of ART Monitoring Strategies in Sub-Saharan Africa**. Sustainable HIV Treatment in Africa through Viral Load-Informed Differentiated Care. *Nature*, 2015. 528(7580):S68-76.
- 50
- 51 19. **Nichols BE**, Gotz HM, van Gorp ECM, Verbon A, Rokx C, Boucher CAB, van de Vijver DAMC. Partner notification for reduction of HIV-1 transmission and related costs among men who have sex with men: a mathematical modeling study. *PLoS One*, 2015. 10(11):e0142576.
- 55
- 56
- 57
- 58
- 59
- 60

- 1  
2  
3  
4  
5  
6  
7  
8  
9  
10  
11  
12  
13  
14  
15  
16  
17  
18  
19  
20  
21  
22  
23  
24  
25  
26  
27  
28  
29  
30  
31  
32  
33  
34  
35  
36  
37  
38  
39  
40  
41  
42  
43  
44  
45  
46  
47  
48  
49  
50  
51  
52  
53  
54  
55  
56  
57  
58  
59  
60
20. **Nichols BE**, Sigaloff KC, Kityo C, Hamers RL, Baltussen R, Bertagnolio S, Jordan MR, Hallett TB, Boucher CA, Rinke de Wit TF, van de Vijver DA. Increasing the use of second-line therapy is a cost-effective approach to prevent the spread of drug-resistant HIV: a mathematical modelling study. *J Int AIDS Soc*, 2014. 17:19164.
  21. **Nichols BE**, Baltussen R, van Dijk JH, Thuma PE, Nouwen JL, Boucher CA, van de Vijver DA. Cost-effectiveness of PrEP in HIV/AIDS control in Zambia: a stochastic league approach. *J AIDS*, 2014. 66(2):221-8.
  22. Eaton JW, Menzies NA, Stover J, Cambiano V, Chindelevitch L, Cori A, Hontelez JAC, Humair S, Kerr CC, Klein DJ, Mishra S, Mitchell KM, **Nichols BE**, Vickerman P, Bakker R, Barnighausen T... Hallett TB. How should HIV programmes respond to evidence for the benefit of earlier treatment initiation? A combined analysis of twelve mathematical models. *Lancet Global Health*, 2014. 2:e23-34.
  23. Armstrong JC\*, **Nichols BE\***, Wilson JM, Cosico RA, Shanks L. Spinal cord injury in the emergency context: review of program outcomes of a spinal cord injury rehabilitation program in Sri Lanka. *Conflict and Health*, 2014. 8(1):4.
  24. **Nichols BE**, Sigaloff KC, Kityo C, Mandaliya K, Hamers RL, Bertagnolio S, Jordan MR, Boucher CA, Rinke de Wit TF, van de Vijver DA. Averted HIV infections due to expanded antiretroviral treatment eligibility offsets risk of transmitted drug resistance: A modeling study. *AIDS*, 2014. 28(1):73-83.
  25. van de Vijver DA, **Nichols BE**, Abbas UL, Boucher CA, Cambiano V, Eaton JW, Glaubius R, Lythgoe K, Mellors J, Phillips A, Sigaloff KC, Hallett TB. Pre-Exposure Prophylaxis will have a limited impact on HIV-1 drug resistance in sub-Saharan Africa: A comparison of mathematical models. *AIDS*, 2013. 27(18):2943-2951.

# Alemayehu Amberbir

POSITION TITLE: Epidemiologist

eRA Commons User Name: A.AMBERBIR\_DI

## EDUCATION/TRAINING

| INSTITUTION AND LOCATION      | DEGREE<br>(if applicable) | YEAR(s) | FIELD OF STUDY |
|-------------------------------|---------------------------|---------|----------------|
| Haramaya University, Ethiopia | BSc                       | 2004    | Health Officer |
| Jimma University, Ethiopia    | MPH                       | 2007    | Public Health  |
| University of Nottingham, UK  | PhD                       | 2012    | Epidemiology   |

## Positions and Honors

Sept 2003 – Jun 2004 Intern (Clinical/Public Health), Haramaya University & Hiwot Fana Hospital, Ethiopia  
 Oct 2004 – Sept 2005 HIV/AIDS Prevention and Care Program Officer, Menschen Für Menschen, Ethiopia  
 Aug 2007 - Mar 2008 Lecturer, Department of Epidemiology and Biostatistics, Jimma University, Ethiopia  
 Feb 2008 – Mar 2011 Honorary Lecturer, Addis Ababa University, Ethiopia  
 Feb 2008 – Feb 2012 Research Fellow, University of Nottingham, UK  
 Mar 2012 – Sep 2013 Research Fellow, London School of Hygiene and Tropical Medicine, UK  
 Oct 2013 – Jan 2016 Lecturer, London School of Hygiene and Tropical Medicine, UK  
 Jan 2016 – Jun 2019 Epidemiologist, Dignitas International  
 Jan 2018 – Jun 2019 Adjunct Lecturer, Dalla Lana School of Public Health, University of Toronto  
 Jan 2018 – Dec 2019 Postdoctoral Fellow; CIHR Canadian HIV Trials Network (CTN), Canada  
 Aug 2019 – present Science Director, University of California Los Angeles; David Geffen School of Medicine

## Contribution to Science

*Investigating non-communicable diseases (hypertension, diabetes and asthma) in Africa (selected)*

- Soares ALG, Banda L, **Amberbir A**, Jaffar S, Musicha C, Price A, Nyirenda MJ, Lawlor DA, Crampin A. Sex and area differences in the association between adiposity and lipid profile in Malawi. *BMJ Glob Health*. 2019 Sep 11;4(5):e001542. doi: 10.1136/bmjgh-2019-001542.
- Amberbir A**. The challenge of worldwide tuberculosis control: and then came diabetes. *Lancet GlobHealth*. 2019 Apr;7(4):e390-e391. doi: 10.1016/S2214-109X(19)30053-1.
- Amberbir A**, S Lin, J Berman, et al A Muula, D Jacoby, E Wroe et al. Systematic review of hypertension and diabetes burden and risk factors and interventions for prevention and control in



1  
2  
3 Malawi: The NCD BRITE Consortium. *Glob Heart*. 2019 Jun;14(2):149-154. doi:  
4 10.1016/j.gheart.2019.05.004. Review.  
5

6 4. **Amberbir A**, Banda V, Singano V, Matengeni A, Pfaff C, Ismail Z, Allain TJ, Chan AK,  
7 Sodhi SK, van Oosterhout JJ. Effect of cardio-metabolic risk factors on all-cause mortality  
8 among HIV patients on antiretroviral therapy in Malawi: A prospective cohort study. *PLoS ONE*.  
9 2019 Jan 17;14(1):e0210629. doi: 10.1371/journal.pone.0210629. PMID: 30653539  
10

11 5. **Amberbir A**, Singano V, Matengeni A, Ismail Z, Kawalazira G, Chan AK, et al.  
12 Dyslipidemia among rural and urban HIV patients in south-east Malawi. *PLoS ONE* 2018;  
13 13(5): e0197728. <https://doi.org/10.1371/journal.pone.0197728>  
14

15 6. Price AJ, Crampin AC, **Amberbir A**, et al. Prevalence of obesity, hypertension and diabetes, and  
16 cascade of care in sub-Saharan Africa: a cross-sectional population-based study in rural and urban  
17 Malawi. *Lancet Diabetes Endocrinol* 2018; published online Jan 19.  
18 [http://dx.doi.org/10.1016/S2213-8587\(17\)30432-1](http://dx.doi.org/10.1016/S2213-8587(17)30432-1).  
19

20 7. \*The GBD 2015 Obesity Collaborators et al [**inc Amberbir A**]. Health Effects of Overweight  
21 and Obesity in 195 Countries over 25 Years. *N Engl J Med* 2017;377(1):13-27.  
22

23 8. Divala OH, **Amberbir A**, Ismail Z, Beyene T, Garone D, Pfaff C, Singano V, Akello H,  
24 Joshua M, Nyirenda MJ, Matengeni A, Berman J, Mallewa J, Chinomba GS, Kayange N, Allain  
25 TJ, Chan AK, Sodhi SK, van Oosterhout JJ. The burden of hypertension, diabetes mellitus, and  
26 cardiovascular risk factors among adult Malawians in HIV care: consequences. *BMC Public*  
27 *Health*. 2016 Dec 12;16(1):1243. PMID:27955664  
28

29 9. Crampin AC, Kayuni N, **Amberbir A**, Musicha C, Koole O, Tafatatha T, Branson K, Saul J,  
30 Mwaiyeghele E, Nkhwazi L, Phiri A, Price AJ, Mwagomba B, Mwansambo C, Jaffar S, Nyirenda  
31 MJ. Hypertension and Diabetes in Africa: Design and implementation of a large population-  
32 based study of burden and risk factors in rural and urban Malawi. *Emerging Themes in*  
33 *Epidemiology*. 2016, 13:3. DOI: 10.1186/s12982-015-0039-2  
34

35 10. Jaffar S, **Amberbir A**, Kayuni N, Musicha C, Nyirenda M. Viewpoint: scaling up testing  
36 services for noncommunicable diseases in Africa: priorities for implementation research. *Trop*  
37 *Med Int Health*. 2013Nov;18(11):1353-6. doi: 10.1111/tmi.12180. Epub 2013 Sep  
38

39 11. **Amberbir A**, Medhin G, Hanlon C, Britton J, Davey G, Venn A. Effects of early life  
40 paracetamol use on the incidence of allergic disease and sensitization: 5 year follow-up of an  
41 Ethiopian birth cohort. *PLoS ONE*. 2014 Apr 9;9(4):e93869. doi:  
42 10.1371/journal.pone.0093869.  
43

44 12. **Amberbir A**, Medhin G, Abegaz WE, Hanlon C, Robinson K, Fogarty A, Britton J, Venn  
45 A, Davey G. Exposure to *Helicobacter pylori* infection in early childhood and the risk of  
46 allergic disease and atopic sensitization: a longitudinal birth cohort study. *Clin Exp Allergy*.  
47 2014 Apr;44(4):563-71. doi:  
48

49 13. **Amberbir A**, Medhin G, Erku W, Alem A, Simms R, Robinson K, Fogarty A, Britton J, Venn  
50 A, Davey G. Effects of *Helicobacter pylori*, geohelminth infection and selected commensal  
51 bacteria on the risk of allergic disease and sensitization in 3-year-old Ethiopian children. *Clin*  
52 *Exp Allergy*. 2011 Oct;41(10):1422-30. doi: 10.1111/j.1365-2222.2011.03831.x. Epub 2011 Aug  
53 10.  
54  
55  
56  
57  
58  
59  
60

1  
2  
3  
4 14. **Amberbir A**, Medhin G, Alem A, Britton J, Davey G, Venn A. The role of acetaminophen  
5 and geohelminth infection on the incidence of wheeze and eczema: a longitudinal birth-cohort  
6 study. *Am J Respir Crit Care Med*. **2011** Jan 15;183(2):165-70. doi: 10.1164/rccm.201006-  
7 0989OC. Epub 2010 Oct 8.  
8  
9

10 *HIV risk behaviours and status disclosure in African settings (selected)*  
11

12 1) Dessalegn NG, Hailemichael RG, Shewa-Amare A, Sawleshwarkar S, Lodebo B, **Amberbir**  
13 **A**, Hillman RJ. HIV Disclosure: HIV-positive status disclosure to sexual partners among  
14 individuals receiving HIV care in Addis Ababa, Ethiopia. *PLoS One*. **2019** Feb  
15 15;14(2):e0211967. doi: 10.1371/journal.pone.0211967. eCollection 2019.  
16

17  
18 2) Deribe K, Woldemichael K, Wondafrash M, Haile A, **Amberbir A**. Disclosure experience  
19 and associated factors among HIV positive men and women clinical service users in  
20 Southwest Ethiopia. *BMC Public Health*. 2008 Feb 29;8:81. doi: 10.1186/1471-2458-8-81.  
21

22  
23 3) Biadgilign S, Deribew A, **Amberbir A**, Escudero HR, Deribe K. Factors associated  
24 with HIV/AIDS diagnostic disclosure to HIV infected children receiving HAART: a multi-  
25 center study in Addis Ababa, Ethiopia. *PLoS ONE*. 2011 Mar 21;6(3):e17572. doi:  
26 10.1371/journal.pone.0017572.  
27

28 *Health system research in to infectious diseases – HIV – in Africa (selected)*  
29

30 1. Alhaj M<sup>1,2¶</sup>, **Amberbir A**<sup>1¶</sup>, Singogo E, Banda V, van Lettow M, Matengeni A, Kawalazira  
31 G, Theu J, Jagriti MR, Chan AK, van Oosterhout JJ. Retention on antiretroviral therapy  
32 during universal test and treat implementation in Zomba district, Malawi: a retrospective  
33 cohort study. *J Int AIDS Soc*. 2019 Feb;22(2):e25239. doi: 10.1002/jia2.25239.  
34

35  
36 2. Singano V<sup>¶</sup>, **Amberbir A**<sup>¶</sup>, Garone D, Kandionamaso C, Msonko J; van Lettow M,  
37 Kalima K, Mataka, Kawalazira G, Mateyu G, Kwekwesa A, Matengeni A; van  
38 Oosterhout JJ. The burden of gynecomastia among men on Antiretroviral Therapy in  
39 Zomba, Malawi. *PLoS ONE* 12(11): e0188379: doi.org/10.1371/journal.pone.0188379  
40

41  
42 3. Mpawa H, Kwekwesa A, **Amberbir A**, Garone D, Divala OH, Kawalazira G, van Schoor V ,  
43 Ndindi H, van Oosterhout JJ. Virological outcomes of Antiretroviral Therapy in Zomba Central  
44 Prison, Malawi: *J Int AIDS Soc* 2017, 20:21623  
45

46 4. **Amberbir A**, Woldemichael K, Getachew S, Girma B, Deribe K. Predictors of adherence to  
47 antiretroviral therapy among HIV-infected persons: a prospective study in Southwest  
48 Ethiopia. *BMC Public Health*. **2008** Jul 30;8:265. doi: 10.1186/1471-2458-8-265.  
49

50  
51 5. Biadgilign S, Deribew A, **Amberbir A**, Deribe K. Barriers and facilitators to  
52 antiretroviral medication adherence among HIV-infected paediatric patients in  
53 Ethiopia: A qualitative study. *SAHARA J*. 2009 Dec;6(4):148-54.  
54  
55  
56  
57  
58  
59  
60

- 1  
2  
3 6. Deribe K, Hailekiros F, Biadgilign S, **Amberbir A**, Beyene BK. Defaulters from  
4 antiretroviral treatment in Jimma University Specialized Hospital, Southwest Ethiopia. *Trop*  
5 *Med Int Health*. 2008 Mar;13(3):328-33. doi: 10.1111/j.1365-3156.2008.02006.x. Epub  
6 2008 Feb 21.  
7  
8  
9  
10  
11  
12  
13  
14  
15  
16  
17  
18  
19  
20  
21  
22  
23  
24  
25  
26  
27  
28  
29  
30  
31  
32  
33  
34  
35  
36  
37  
38  
39  
40  
41  
42  
43  
44  
45  
46  
47  
48  
49  
50  
51  
52  
53  
54  
55  
56  
57  
58  
59  
60



# LAWRENCE C. LONG, PHD, MCOM

**OFFICE ADDRESS:** 801 Massachusetts Avenue,  
Crosstown Center, 3<sup>rd</sup> Floor, Room 369  
Boston, MA, 02119, USA.  
+1 (617) 358-3122  
Email: [lclong@bu.edu](mailto:lclong@bu.edu)

## ACADEMIC TRAINING:

|      |            |                                                                                                                                 |
|------|------------|---------------------------------------------------------------------------------------------------------------------------------|
| 2016 | Ph.D.      | School of Public Health, University of Witwatersrand (Johannesburg, South Africa)                                               |
| 2009 | M.Com.     | School of Economic and Business Sciences, University of Witwatersrand (Johannesburg, South Africa), Economics, <i>cum laude</i> |
| 2001 | B.Bus.Sci. | School of Economics, University of Cape Town (Cape Town, South Africa), Economics and Finance                                   |

## ACADEMIC LEADERSHIP:

|             |                      |                                                                                                                                      |
|-------------|----------------------|--------------------------------------------------------------------------------------------------------------------------------------|
| 2011 - 2017 | Deputy Division Head | Health Economics & Epidemiology Research Office<br>Wits Health Consortium<br>Faculty of Health Sciences, University of Witwatersrand |
| 2008 – 2011 | Research Coordinator | Health Economics & Epidemiology Research Office<br>Wits Health Consortium<br>Faculty of Health Sciences, University of Witwatersrand |

## RESEARCH APPOINTMENTS:

|        |                                 |                                                                                                                        |
|--------|---------------------------------|------------------------------------------------------------------------------------------------------------------------|
| –      | Research Assistant              | Department of Global Health, School of Public Health, Boston University                                                |
| 2017 t | Professor                       |                                                                                                                        |
| –      | Associate Researcher            | Joint Faculty Appointment, School of Clinical Medicine, Faculty of Health Sciences, University of the Witwatersrand    |
| 2008 t |                                 |                                                                                                                        |
| –      | Principal Researcher (Visiting) | Health Economics & Epidemiology Research Office<br>Wits Health Consortium<br>Faculty of Health Sciences, University of |
| 2008 t |                                 |                                                                                                                        |

|             |                    |  |                                           |
|-------------|--------------------|--|-------------------------------------------|
|             |                    |  | Witwatersrand                             |
|             |                    |  | Health Economics & Epidemiology           |
|             |                    |  | Research Office                           |
| 2006 – 2007 | Research Associate |  | Wits Health Consortium                    |
|             |                    |  | Faculty of Health Sciences, University of |
|             |                    |  | Witwatersrand                             |
|             |                    |  | Health Economics & Epidemiology           |
| 2005        | Study Coordinator  |  | Research Office                           |
|             |                    |  | Wits Health Consortium                    |
|             |                    |  | Faculty of Health Sciences, University of |
|             |                    |  | Witwatersrand                             |

#### OTHER RESEARCH EXPERIENCE:

|             |            |  |                                                                                                                                                                                                           |
|-------------|------------|--|-----------------------------------------------------------------------------------------------------------------------------------------------------------------------------------------------------------|
| 2007 – 2008 | Consultant |  | Center for International Health and Development,<br>Boston University School of Public Health<br>Project: <i>Cost and Outcomes of Models for Delivering Antiretroviral Therapy for HIV/AIDS in Zambia</i> |
| 2007 – 2008 | Consultant |  | Center for International Health and Development,<br>Boston University School of Public Health<br>Project: <i>Cost and Outcomes of Models for Delivering Antiretroviral Therapy for HIV/AIDS in Kenya</i>  |

#### TEACHING EXPERIENCE:

|      |  |                                                                                                                                                                                                                                                                                           |
|------|--|-------------------------------------------------------------------------------------------------------------------------------------------------------------------------------------------------------------------------------------------------------------------------------------------|
| 2019 |  | <b>Structural factors affecting HIV – an economists perspective.</b><br>Audience: MPH Students. Guest<br>Lecture in Individual, Community, and Population Health SPH GH 720<br>Boston University, Boston,<br>USA. Presented in two classes (Profs Monica Onyango & Jennifer Schlezinger). |
| 2019 |  | <b>Economic evaluation.</b> Audience: MPH Students. Guest Lecture in<br>Monitoring and Evaluation of<br>Global Health Programs SPH GH 745, Boston University, Boston, USA.                                                                                                                |
| 2019 |  | <b>Using economics to influence policy.</b> Audience: MPH Students. Guest<br>Lecture in Essential of<br>Economics and Finance for Global Health SPH GH 762, Boston<br>University, Boston, USA.                                                                                            |
| 2017 |  | <b>From cost to clinic – Economics changing health policy.</b> Audience:<br>MPH Students. Guest<br>Lecture in Essentials of Economics and Finance for Global Health SPH<br>GH 762, Boston University,<br>Boston, USA.                                                                     |
| 2016 |  | <b>Data collection and analysis for economic evaluations.</b> Audience:<br>Technical implementing<br>partners. EQUIP Partners Meeting,<br>Johannesburg, South Africa.                                                                                                                     |

- 1  
2  
3  
4 2016 **From patient to policy – Ensuring that your clinical practice is positioned to inform evidenced based policy.** Audience: HIV Clinicians. Chair of Research Skills Building Session, Southern African HIV Clinicians Society Conference, Johannesburg, South Africa.
- 5  
6  
7  
8  
9  
10 2014 **Introduction to Health Programme Evaluation.** Audience: MSc students – Module of Epidemiology for Health Researchers II. University of Witwatersrand, Johannesburg.

11  
12  
13  
14  
15  
16  
17 **INVITED PRESENTATION:**

- 18  
19 2019 **Costs and resources needed to provide HIV services to key populations over the next 10 years.** Idea creation meeting – Defining and addressing HIV treatment and prevention needs of underserved and high-risk populations. BMGF & Journal of International AIDS Society, New York, USA.
- 20  
21  
22  
23  
24  
25 2019 **Direct action to achieve a result.** Spotlight on “Think, Teach, Do”, School of Public Health, Boston University, Boston, USA.
- 26  
27  
28 2019 **Learning Community – Take home.** Academy for Faculty Advancement, School of Medicine, Boston University, Boston, USA.
- 29  
30  
31 2018 **Urban public health issues – the transition to Boston.** Health Economics and Epidemiology Research Office, Johannesburg, South Africa.
- 32  
33  
34 2017 **Partner’s Area of Expertise – Health Economics.** USAID South Africa, Partners Meeting, Pretoria, South Africa. Presented in absentia by Denise Evans.
- 35  
36  
37 2017 **Innovations Research on AIDS (INROADS).** Director Doug Arbuckle, Office HIV AIDS (OHA, USA). USAID, Johannesburg, South Africa. Presented in absentia by Denise Evans.
- 38  
39  
40  
41 2016 **Test and Start – Research supporting evidence based policy change.** Zambian Department of Health & USAID, EQUIP Project, Johannesburg, South Africa.
- 42  
43  
44  
45 2016 **Initiating ART at a patients first clinic visit: the RapIT randomised trial.** Faculty of Health Sciences Research Day, University of Witwatersrand, Johannesburg, South Africa.
- 46  
47  
48

49 **CONFERENCE ORAL PRESENTATIONS:**

- 50  
51  
52 1. Van Rensburg C, Berhanu R, Hirasen K, Evans D, Rosen S, **Long L.** Cost outcome analysis of decentralised care for drug-resistant tuberculosis in Johannesburg, South Africa. 49<sup>th</sup> Union World Conference on Lung Health, 24-27 October, The Hague, The Netherlands. 2018.
- 53  
54  
55  
56  
57  
58  
59  
60

2. Evans D, Musakwa N, Nattey C, Bor J, Lonnermark E, Larshans C, Andreasson S, Nyasulu P, **Long L**. Barriers to accessing care for HIV and Tuberculosis among adolescents and young adults aged 18 – 25 years in Johannesburg, South Africa. 5<sup>th</sup> SA TB Conference, 12-15 June, Durban, South Africa. 2018.
3. Lince-Deroche N, Leuner R, **Long L**. When Donor Funding Leaves: The immediate impact on resources of withdrawal of support for direct HIV care and treatment at public health facilities in Johannesburg. 9<sup>th</sup> International AIDS Society (IAS) Conference, 23-26 July, Paris, France. 2017.
4. Musakwa N, Evans D, Feeley A, Magwete M, Patz S, McNamara L, **Long L**, Sanne I. Acute malnutrition and dietary intake among paediatric HIV-positive patients initiating antiretroviral therapy in Johannesburg, South Africa. 8<sup>th</sup> SA AIDS Conference, 13-15 June, Durban, South Africa. 2017.
5. Rosen S, Maskew M, Fox MP, Nyoni C, Mongwenyana C, Maletse G, Sanne I, Bokaba D, Sauls C, Rohr J, **Long L**. Initiating ART at a Patient's First Clinic Visit: The RapIT Randomized Trial. Conference on Retroviruses and Opportunistic Infections (CROI) 2016, 22-25 February, Boston, USA.
6. Hirasen K, Berhanu R, Schnippel K, **Long L**, Rosen S, Sanne I. Twelve-month outcomes of patients initiating drug-resistant tuberculosis treatment at a decentralized outpatient clinic in Johannesburg, South Africa. 46<sup>th</sup> World Conference on Lung Health of the International Union Against Tuberculosis and Lung Disease (The Union), Cape Town, South Africa, 2-6 December 2015.
7. Evans D, Schnippel K, Budgell E, Shearer K, Berhanu R, **Long L**, Rosen S. Predictors of mortality in patients diagnosed with preXDR- and XDR-TB: results from the South African National TB Programme, 2009-2010. 46<sup>th</sup> World Conference on Lung Health of the International Union Against Tuberculosis and Lung Disease (The Union), Cape Town, South Africa, 2-6 December 2015.

#### BIBLIOGRAPHY:

ORCID ID: [0000-0003-4986-4988](https://orcid.org/0000-0003-4986-4988)  
Google Scholar: <https://scholar.google.co.za/citations?user=fao8zDgAAAAJ&hl=en&oi=ao>

#### Peer reviewed publications:

1. **Long L**, Kuchukhidze S, Pascoe S, Nichols B, Cele R, Govathson C, Huber A, Flynn D, Rosen S. Differentiated models of service delivery for antiretroviral treatment of HIV in sub-Saharan Africa: a rapid review protocol. *Systematic Reviews*. DOI: 10.1186/s13643-019-1210-6. 2019.

- 1
- 2
- 3
- 4 2. Jamieson L, Evans D, Berhanu R, Ismail N, Aucock S, Wallengren K, **Long L**. Data quality of drug-resistant tuberculosis and antiretroviral therapy electronic registers in South Africa. *BMC Public Health*. DOI: 10.1186/s12889-019-7965-9. 2019.
- 5
- 6
- 7
- 8 3. Mokhele I, Mashamaite S, Majuba P, Xulu T, **Long L**, Onoya D. Effective public-private partnerships for sustainable antiretroviral therapy: outcomes of the Right to Care health services GP down-referral program. *BMC Public Health*. DOI: 10.1186/s12889-019-7660-x. 2019.
- 9
- 10
- 11
- 12
- 13 4. Lince-Deroche N, Leuner R, Meyer-Rath G, Pillay Y, **Long L**. When Donor Funding Leaves: A retrospective review of the impact of integrating direct HIV care and treatment into public health services in a region of Johannesburg. *Cost Effectiveness and Resource Allocation*. DOI: 10.1186/s12962-019-0192-5. 2019.
- 14
- 15
- 16
- 17 5. Musakwa N, Feeley A, Magwete M, Patz S, McNamara L, Sanne I, **Long L**, Evans D. Dietary intake among paediatric HIV-positive patients initiating antiretroviral therapy in Johannesburg, South Africa. *Vulnerable Children and Youth Studies (RVCH)*. DOI: 10.1080/17450128.2019.166858. 2019.
- 18
- 19
- 20
- 21 6. Brennan A, Bonawitz R, Gill CJ, Thea DM, Kleinman M, **Long L**, McCallum C, Fox MP. A Meta-analysis Assessing Diarrhea and Pneumonia in HIV-Exposed Uninfected Compared With HIV-Unexposed Uninfected Infants and Children. *Journal of Acquired Immune Deficiency Syndrome (JAIDS)*. DOI: 10.1097/QAI.0000000000002097. 2019
- 22
- 23
- 24
- 25
- 26
- 27 7. Berry KM, Rodriguez CA, Berhanu R, Ismail N, Rosen S, **Long L**, Evans D. Treatment outcomes among pediatrics, adolescents, and adults on treatment for drug-sensitive TB in two metropolitan municipalities in Gauteng Province, South Africa. *BMC Public Health*. DOI: 10.1186/s12889-019-7257-4. 2019.
- 28
- 29
- 30
- 31
- 32
- 33
- 34
- 35
- 36
- 37
- 38
- 39
- 40
- 41
- 42
- 43
- 44
- 45
- 46
- 47
- 48
- 49
- 50
- 51
- 52
- 53
- 54
- 55
- 56
- 57
- 58
- 59
- 60

# BMJ Open

## Identifying efficient linkage strategies for HIV self-testing (IDEaL): a study protocol for an individually randomized control trial

|                                 |                                                                                                                                                                                                                                                                                                                                                                                                                                                                                                                                                                                                                                                                                                                                                                                                                                                                                                                                                                                                                                                                                                                                                                                                                                                                                                                                                          |
|---------------------------------|----------------------------------------------------------------------------------------------------------------------------------------------------------------------------------------------------------------------------------------------------------------------------------------------------------------------------------------------------------------------------------------------------------------------------------------------------------------------------------------------------------------------------------------------------------------------------------------------------------------------------------------------------------------------------------------------------------------------------------------------------------------------------------------------------------------------------------------------------------------------------------------------------------------------------------------------------------------------------------------------------------------------------------------------------------------------------------------------------------------------------------------------------------------------------------------------------------------------------------------------------------------------------------------------------------------------------------------------------------|
| Journal:                        | <i>BMJ Open</i>                                                                                                                                                                                                                                                                                                                                                                                                                                                                                                                                                                                                                                                                                                                                                                                                                                                                                                                                                                                                                                                                                                                                                                                                                                                                                                                                          |
| Manuscript ID                   | bmjopen-2022-070896.R1                                                                                                                                                                                                                                                                                                                                                                                                                                                                                                                                                                                                                                                                                                                                                                                                                                                                                                                                                                                                                                                                                                                                                                                                                                                                                                                                   |
| Article Type:                   | Protocol                                                                                                                                                                                                                                                                                                                                                                                                                                                                                                                                                                                                                                                                                                                                                                                                                                                                                                                                                                                                                                                                                                                                                                                                                                                                                                                                                 |
| Date Submitted by the Author:   | 28-Mar-2023                                                                                                                                                                                                                                                                                                                                                                                                                                                                                                                                                                                                                                                                                                                                                                                                                                                                                                                                                                                                                                                                                                                                                                                                                                                                                                                                              |
| Complete List of Authors:       | Dovel , Kathryn ; University of California Los Angeles, Division of Infectious Diseases ; Partners in Hope Medical Center, Implementation Science Department<br>Balakasi, Kelvin; Partners in Hope Medical Center, Implementation Science Department<br>Hubbard, Julie; University of California Los Angeles, Division of Infectious Diseases ; Partners in Hope Medical Center, Implementation Science Department<br>Phiri, Khumbo; Partners in Hope Medical Center, Implementation Science Department<br>Nichols, Brooke ; Boston University, Department of Global Health; Health Economics and Epidemiology Research Office,<br>Coates, Thomas; University of California Los Angeles, Division of Infectious Diseases, School of Medicine<br>Kulich, Michal; Charles University, Department of Probability and Math Statistics<br>Chikuse, Elijah; Partners in Hope Medical Center, Implementation Science Department<br>Phiri, Sam; Partners in Hope Medical Center, Implementation Science Department<br>Long, Lawrence; Boston University School of Public Health, Department of Global Health; Faculty of Health Sciences University of the Witwatersrand, Department of Internal Medicine<br>Hoffman, Risa; University of California Los Angeles, Division of Infectious Diseases<br>Choko, Augustine; University of Malawi, College of Medicine |
| <b>Primary Subject Heading</b>: | HIV/AIDS                                                                                                                                                                                                                                                                                                                                                                                                                                                                                                                                                                                                                                                                                                                                                                                                                                                                                                                                                                                                                                                                                                                                                                                                                                                                                                                                                 |
| Secondary Subject Heading:      | Global health, Health services research, Infectious diseases, Public health                                                                                                                                                                                                                                                                                                                                                                                                                                                                                                                                                                                                                                                                                                                                                                                                                                                                                                                                                                                                                                                                                                                                                                                                                                                                              |
| Keywords:                       | HIV & AIDS < INFECTIOUS DISEASES, Infection control < INFECTIOUS DISEASES, Clinical trials < THERAPEUTICS                                                                                                                                                                                                                                                                                                                                                                                                                                                                                                                                                                                                                                                                                                                                                                                                                                                                                                                                                                                                                                                                                                                                                                                                                                                |
|                                 |                                                                                                                                                                                                                                                                                                                                                                                                                                                                                                                                                                                                                                                                                                                                                                                                                                                                                                                                                                                                                                                                                                                                                                                                                                                                                                                                                          |

1  
2  
3  
4  
5  
6  
7  
8  
9  
10  
11  
12  
13  
14  
15  
16  
17  
18  
19  
20  
21  
22  
23  
24  
25  
26  
27  
28  
29  
30  
31  
32  
33  
34  
35  
36  
37  
38  
39  
40  
41  
42  
43  
44  
45  
46  
47  
48  
49  
50  
51  
52  
53  
54  
55  
56  
57  
58  
59  
60

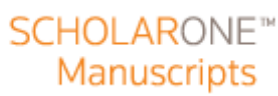

1  
2  
3 **Identifying efficient linkage strategies for HIV self-testing (IDEaL): a study protocol for an**  
4 **individually randomized control trial**  
5  
6

7 Kathryn Dovel<sup>1,2§</sup>, Kelvin Balakasi<sup>1</sup>, Julie Hubbard<sup>1</sup>, Khumbo Phiri<sup>1</sup>, Brooke E. Nichols<sup>3,4</sup>, Thomas J.  
8 Coates<sup>1</sup>, Michal Kulich<sup>5</sup>, Elijah Chikuse<sup>2</sup>, Sam Phiri<sup>2</sup>, Lawrence Long<sup>3,4</sup>, Risa Hoffman<sup>1</sup>, Augustine  
9 Choko<sup>6</sup>.  
10

11  
12 **Author affiliations:**

13 <sup>1</sup> Division of Infectious Diseases, David Geffen School of Medicine, University of California Los  
14 Angeles, Los Angeles, CA, USA

15 <sup>2</sup> Partners in Hope, Lilongwe, Malawi

16 <sup>3</sup> Department of Global Health, Boston University School of Public Health, Boston, MA, USA

17 <sup>4</sup> Department of Internal Medicine, Faculty of Health Sciences, University of the Witwatersrand,  
18 Johannesburg, South Africa

19 <sup>5</sup> Department of Probability and Math. Statistics, Faculty of Mathematics and Physics, Charles University,  
20 Prague, Czech Republic

21 <sup>6</sup> College of Medicine, University of Malawi, Blantyre, Malawi  
22  
23  
24

25 **§ Corresponding Author:** Kathryn Dovel

26 Division of Infectious Diseases, David Geffen School of Medicine

27 10833 Le Conte Ave, Los Angeles, CA 90095

28 Phone: +13108838179

29 Email: [kdovel@mednet.ucla.edu](mailto:kdovel@mednet.ucla.edu) / [kldovel@gmail.com](mailto:kldovel@gmail.com)  
30  
31

32  
33 **E-mail addresses of authors:**

34 KD: [KDovel@mednet.ucla.edu](mailto:KDovel@mednet.ucla.edu)

35 KB: [kelvin@pihmalawi.com](mailto:kelvin@pihmalawi.com)

36 JH: [jhubbard@mednet.ucla.edu](mailto:jhubbard@mednet.ucla.edu)

37 KP: [khumbo@pihmalawi.com](mailto:khumbo@pihmalawi.com)

38 BN: [brooken@bu.edu](mailto:brooken@bu.edu)

39 TC: [TCoates@mednet.ucla.edu](mailto:TCoates@mednet.ucla.edu)

40 MK: [kulich@karlin.mff.cuni.cz](mailto:kulich@karlin.mff.cuni.cz)

41 EC: [elijah@pihmalawi.com](mailto:elijah@pihmalawi.com)

42 SP: [samphiri@pihmalawi.com](mailto:samphiri@pihmalawi.com)

43 LL: [lclong@bu.edu](mailto:lclong@bu.edu)

44 RH: [RHoffman@mednet.ucla.edu](mailto:RHoffman@mednet.ucla.edu)

45 AC: [augutc@gmail.com](mailto:augutc@gmail.com)  
46  
47

48 **Word Count:** Abstract: 252; Manuscript: 3,967

49 **Trial registration number:** NCT05137210

50  
51 **Keywords:** HIV, men, ART initiation, ART retention, Stepped interventions, sub-Saharan Africa

52  
53 **Date and version:** 13 March 2023: Version 2  
54

55 **ABSTRACT**  
56  
57  
58  
59  
60



## Introduction

Men in sub-Saharan Africa are less likely than women to initiate antiretroviral therapy (ART) and more likely to have longer cycles of disengagement from ART programs. Treatment interventions that meet the unique needs of men are needed, but they must be scalable. We will test the impact of various interventions on six-month retention in ART programs among men living with HIV who are not currently engaged in care (never initiated ART and ART clients with treatment interruption).

## Methods and Analysis

We will conduct a programmatic, individually randomized, non-blinded, controlled trial. “Non-engaged” men will be randomized 1:1:1 to either a Low-Intensity, High-Intensity, or Stepped arm. The Low-Intensity Intervention includes one-time male-specific counseling + facility navigation only. The High-Intensity Intervention offers immediate outside-facility ART initiation + male-specific counseling + facility navigation for follow-up ART visits. In the Stepped arm, intervention activities build in intensity over time for those who do not reengage in care with the following steps: 1) one-time male-specific counseling + facility navigation → 2) ongoing male mentorship + facility navigation → 3) outside-facility ART initiation + male-specific counseling + facility navigation for follow-up ART visits. Our primary outcome is 6-month retention in care. Secondary outcomes include cost-effectiveness and rates of adverse events. The primary analysis will be intention to treat with all eligible men in the denominator and all men retain in care at 6 months in the numerator. The proportions achieving the primary outcome will be compared with a risk ratio, corresponding 95% confidence interval and p-value computed using binomial regression accounting for clustering at facility level.

## Ethics and Dissemination

The Institutional Review Board of the University of California, Los Angeles and the National Health Sciences Research Council in Malawi have approved the trial protocol. Findings will be disseminated rapidly in national and international forums and in peer-reviewed journals and are expected to provide urgently needed information to other countries and donors.

**Trial registration number:** NCT05137210.

## ARTICLE SUMMARY

### Strengths and limitations

- IDEaL provides male-specific differentiated models of care aimed to improve men’s ART outcomes. We specifically focus on building trusting relationships with health care workers and

1  
2  
3 developing client-led, individualized strategies to overcome barriers to care.

- 4
- 5 • IDEaL will test the impact of a stepped intervention for men. This approach promises to improve  
6 the efficiency and reach of HIV programs for men as the highest-resource interventions will only  
7 be received by the minority of men who are most in need.
  - 8 • IDEaL develops and tests male-specific counseling curriculum that, if effective, could easily be  
9 taken to scale. Findings from the study will identify critical components for male-specific  
10 counseling, especially among men who struggle to be retained in HIV care.
  - 11 • IDEaL interventions do not change facility characteristics that may act as barriers to men's use of  
12 facility-based services. IDEaL focuses on providing outside-facility services for reaching men.
- 13  
14  
15  
16  
17  
18  
19  
20  
21  
22  
23  
24  
25  
26  
27  
28  
29  
30  
31  
32  
33  
34  
35  
36  
37  
38  
39  
40  
41  
42  
43  
44  
45  
46  
47  
48  
49  
50  
51  
52  
53  
54  
55  
56  
57  
58  
59  
60

## 1 INTRODUCTION

2 Men in sub-Saharan Africa (SSA) are underrepresented in HIV programs.<sup>1</sup> Men are less likely than women  
3 to know their HIV status and to initiate antiretroviral therapy (ART), and more likely to face treatment  
4 interruptions once in care.<sup>2</sup> Only 69% of men who start ART reach viral suppression compared to 77% of  
5 women.<sup>2</sup> As a result, men in the region are 37% more likely to die from AIDS-related causes as compared  
6 to women.<sup>3</sup>

7  
8 One contributor to men's poor HIV outcomes is an increased risk of disengagement from care. Engagement  
9 in ART programs is not static – many ART clients cycle through care, starting and stopping HIV care  
10 multiple times throughout their lifetime.<sup>4,5</sup> Up to 46% of ART clients experience treatment interruption,<sup>6–8</sup>  
11 and between 30–40% of those who return experience repeat treatment interruption within 6 months.<sup>9,10</sup> Men  
12 are particularly prone to cycling through ART programs, with more frequent stop-start instances and longer  
13 periods outside of care as compared to women.<sup>6,11–13</sup> Improving men's long-term engagement in HIV care  
14 is critical for men's health and reducing HIV transmission.<sup>14</sup>

15  
16 Men who disengage from HIV programs (either after testing HIV-positive or after enrolling in HIV care  
17 services) are frequently described as a difficult and 'hard-to-reach' population.<sup>15,16</sup> However, growing  
18 evidence suggests that men desire HIV services<sup>17,18</sup> but encounter multiple health systems barriers to care  
19 that make it impossible to stay in care long-term.<sup>19</sup> There is an urgent need to develop client-centered  
20 strategies tailored to men that facilitate men's engagement and re-engagement in HIV treatment programs.

21  
22 Some men may require male-specific interventions to facilitate engagement in HIV care. Men have less  
23 exposure to HIV services than women<sup>19,20</sup> and work demands may conflict with ART clinic schedules.<sup>21,22</sup>  
24 Difficult interactions with health care workers (HCWs) can also prevent men from engaging or re-engaging  
25 in care.<sup>23,24</sup> Furthermore, most ART counseling curricula do not target men and often lack the client-  
26 centered counseling needed to develop internal motivation to engage and stay engaged in care.

27  
28 Differentiated service delivery models (DSD) are now being developed to improve men's ART  
29 engagement throughout SSA.<sup>25–27</sup> As DSDs for men are developed, it is critical that strategies be feasible  
30 and cost-effective to allow scale-up. A "one size fits all" model is not as effective as more nuanced  
31 approaches.<sup>28–30</sup> Stepped interventions increase in intensity over time and are purposively designed to  
32 address prevailing barriers in the target population in order to positively affect the desired outcome.<sup>31,32</sup>  
33 An incremental, stepped approach may be the most appropriate and scalable way to improve men's care  
34 in low-resource settings. Men are not homogeneous: some men may require minimal support to engage in

1  
2  
3 35 care, while others may require extensive support. Stepped interventions allow programs to target the  
4 36 highest-resource interventions to the minority of men who need them most.

5  
6 37  
7  
8 38 The *Identifying efficient linkage strategies for HIV self-testing (IDEaL) trial* is an individually  
9 39 randomized control trial aimed to test the impact of various interventions on ART (re-) initiation and six-  
10 40 month retention among men living with HIV who are not currently engaged in HIV care in Malawi. We  
11 41 will compare a Stepped intervention against Low-Intensity and High-Intensity interventions to assess the  
12 42 impact of the Stepped intervention on men's use of ART services over time (see Supporting Information  
13 43 S1). The trial contributes to existing literature by testing male-specific, client-centered strategies to re-  
14 44 engage men in care. This is one of the first trials specifically designed with men's re-engagement in care  
15 45 in mind. If effective, such interventions may decrease repeat treatment interruption and duration of  
16 46 treatment interruptions among men, which can improve viral suppression and reduce onward HIV  
17 47 transmission.<sup>14</sup>

## 24 48 **METHODS AND ANALYSIS**

### 27 49 **Objectives**

28  
29 50 Our primary objective is to test the effect of a male-specific, Stepped intervention on men's 6-month  
30 51 retention in ART care compared to male-specific Low-Intensity and High-Intensity interventions  
31 52 (retention is defined as <28-days late for their ART appointment). Secondary objectives are to understand  
32 53 the effect of a Stepped intervention on: (1) ART initiation; (2) the presence of adverse events (i.e.,  
33 54 unwanted disclosure, end of relationship, or intimate partner violence (IPV)); (3) intervention  
34 55 acceptability; and (4) cost-effectiveness.

### 38 56 39 57 **Trial Design**

40 58 IDEaL is a programmatic, individually randomized, non-blinded controlled trial design. We will recruit  
41 59 men from 15 high-burden health facilities in Malawi using medical chart reviews to identify men who are  
42 60 living with HIV but not engaged in HIV care.

### 46 61 47 62 **Randomization**

48 63 Individual men will be block randomized using R by a biostatistician using a 1:1:1 ratio to either the  
49 64 Stepped, Low-Intensity, or High-Intensity study arm using a computer-generated program. Participants  
50 65 will be randomized in blocks of 3 and 6, depending on the number of men available for recruitment at  
51 66 each facility. After enrolling in the trial and completing a baseline survey, men will be assigned to a study  
52 67 ID based on the randomization list. Study ID's will be linked with the pre-assigned blocked

1  
2  
3 68 randomization and pre-loaded into the tablet device, but will be unknown to the study staff until survey  
4 69 and randomization modules are completed and saved, ensuring randomization cannot be manipulated by  
5 70 the study staff. Once finalized, the randomization results will appear on the tablet device as a picture, and  
6 71 will be shown to the participant to maximize transparency and study buy-in.  
7  
8  
9  
10 72

### 11 73 **Interventions**

12 74 The effectiveness of the Stepped Intervention will be compared to a Low-Intensity Intervention (one time  
13 75 male-specific counseling + facility navigation defined as escort to the facility (if desired) and orientation  
14 76 to the ART clinic and procedures) and to a High-Intensity Intervention (outside-facility ART initiation +  
15 77 male-specific counseling + facility navigation for follow-up ART visits). Across all arms, men who do  
16 78 not (re-)initiate in ART will continue receiving follow-up visits for up to three months, depending on  
17 79 preferences of the client. The number of intervention visits delivered for each participant will be  
18 80 documented.  
19  
20  
21  
22  
23  
24 81

#### 25 82 *Arm 1: Low-Intensity Arm: Male-specific counseling + facility navigation*

26 83 Participants randomized to the Low-Intensity Arm will be traced in the community and receive a one-time,  
27 84 one-on-one male-specific counseling session, using client-centered service techniques.<sup>33</sup> All counseling  
28 85 sessions will be completed by a lay cadre male HIV counselor (called Patient Supporter in Malawi) trained  
29 86 in the study counseling curriculum. Patient supporters are responsible for routine tracing, linkage support  
30 87 medical record documentation and counseling.  
31  
32  
33  
34  
35 88

36 89 The male-specific curriculum is developed specifically for this trial. Ministry of Health counseling  
37 90 materials is adapted to meet the specific needs of men, based on formative in-depth interviews, focus group  
38 91 discussions, and a systematic literature review. Adaptations will include exploring topics of most concern  
39 92 to men in Malawi (i.e., earning money while HIV-positive, side effects and concerns regarding lifelong  
40 93 medication, ART as a tool to provide and care for family, etc.). The materials will also include language  
41 94 and pictures that resonate with men (i.e., emphasizing how HIV and HIV services interact with men's  
42 95 strength, responsibility, planning for the future), and male-specific case studies of challenges men face and  
43 96 how they overcome them. The adapted male-specific counseling curriculum will be developed into a  
44 97 standardized counseling flip chart (i.e., job aid).  
45  
46  
47  
48  
49  
50  
51 98  
52 99

53  
54 100 Men who wish to (re-)initiate ART will be offered facility navigation and facility-based services at the  
55 101 facility of their choice. Participants will be escorted to the facility (if desired), orientated to the ART clinic  
56  
57  
58  
59  
60

1  
2  
3 102 procedures, and introduced to other HCWs who routinely work at the facility. Facility navigation is intended  
4  
5 103 to facilitate a positive experience for men by helping them feel comfortable and confident navigating clinic  
6  
7 104 spaces. Men may access all ART clinical services at the health facility of their choice (but counseling  
8  
9 105 described above will be provided in the community). The client will be responsible for all transport costs  
10  
11 106 related to return to the facility in all study arms.

12  
13 108 Participants who do not (re-)initiate in care within 14 days will be offered followed-up counseling every  
14  
15 109 two weeks until participants (re-)initiate in care or inform the counselor that they do not wish to be  
16  
17 110 contacted.

18  
19 112 ***Arm 2: High-Intensity Arm: Male-specific counseling + outside-facility ART initiation + facility***  
20  
21 113 ***navigation***

22  
23 114 Participants in the High-Intensity Arm will be offered community-based male-specific counseling by HIV  
24  
25 115 counselors (described above), and offered ART (re-)initiation outside-facility (either at home or another  
26  
27 116 location in the community of their choice). Those who choose outside-facility ART initiation will be  
28  
29 117 referred to a male study nurse who will meet participants one-on-one at times and locations that are  
30  
31 118 convenient for participants. The nurse will offer a brief counseling session, reviewing key topics from male-  
32  
33 119 specific counseling curriculum that is most relevant to the individual participant. Nurses will then conduct  
34  
35 120 WHO staging. Individuals classified as WHO Stage 3 or 4 will be referred (and escorted, if desired) to the  
36  
37 121 nearest public health facility for additional services. Participants classified as WHO Stage 1 or 2 will be  
38  
39 122 given same day ART. Prior to their 4-week follow-up ART appointment participants will receive facility  
40  
41 123 navigation by the same nurse and afterward access ART services.

42  
43 124  
44  
45 125 Participants who choose facility-based ART (re-)initiation will be referred (and escorted, if desired) by the  
46  
47 126 HIV counselor (lay cadre) to the nearest facility of their choice and receive facility navigation on a day and  
48  
49 127 time that is convenient for them.

50  
51 128  
52  
53 129 Men who do not (re-)initiate in care will be offered biweekly follow-up counseling at times and intervals  
54  
55 130 determined by participants' preferences until they engage in care or inform the nurse that they no longer  
56  
57 131 wish to be contacted.

58  
59 132  
60 133 ***Arm 3: Stepped Arm***

61  
62 134 The Stepped arm will build in intensity over time for those who have not (re-)initiate in care 14-days after  
63  
64 135 study enrollment, or who do not return for their first ART follow-up appointment after (re-)initiation (see

1  
2  
3 136 Fig 1). Individuals will move to the next “step” every 2-weeks, moving from the lightest to the most  
4  
5 137 intensive interventions over the course of 6 weeks until (re-)initiation has been achieved. The Stepped  
6  
7 138 arm includes the following steps:

8 139

9 140 *Step 1: Male-Specific Counseling + Facility Navigation and Facility-Based ART Services:* Step 1 includes  
10  
11 141 the same components described in the Low-Intensity Arm. Briefly, participants will be traced in the  
12  
13 142 community and receive a one-time male-specific counseling session, with repeat counseling sessions if  
14  
15 143 participants do not (re-)initiate within 14 days after the first counseling session. Men who wish to (re-)  
16  
17 144 initiate in care will be provided facility navigation and standard of care facility-based services.

17 145

19 146 *Step 2: Ongoing Motivational Interviewing + Facility Navigation and Facility-Based ART Services:* Men  
20  
21 147 who do not (re-)initiate in care (either have not engaged ART within 14 days of enrollment or do (re-)initiate  
22  
23 148 ART but are  $\geq 7$ -days late for a follow-up appointment) will move to the next ‘step’ of the intervention,  
24  
25 149 which adds ongoing motivational interviewing to their package of activities. Motivational interviewing is  
26  
27 150 a client-centered, client-led method for counseling that helps participants identify barriers to a desired  
28  
29 151 outcome and develop personalized solutions.<sup>34,35</sup> The strategy has successfully been used with ART  
30  
31 152 clients.<sup>36</sup> Mentors will work with participants to: (1) build self-efficacy, (2) identify internal motivations  
32  
33 153 for the desired behavior, and (3) establish strategies and short- and long-term goals needed to reach ART  
34  
35 154 initiation and retention. A male mentor specifically trained in motivational interviewing adapted to the local  
36  
37 155 context and male population will provide ongoing, one-on-one in-depth counseling, motivational  
38  
39 156 interviewing, and general “check-ins” approximately twice within a two-week period. The mentor will not  
40  
41 157 necessarily be HIV-positive (unlike other mentorship models) as the Malawi Ministry of Health has moved  
42  
43 158 away from HIV-positive peer mentor cadres. However, they will be experienced in HIV counseling and  
44  
45 159 trained on male-specific needs. Motivational interviewing will take place in a location preferred by the  
46  
47 160 participant, likely in the community. Participants who choose to (re) initiate ART can access ART services  
48  
49 161 at the facility of their choice and will be given facility navigation as described in Arm 1.

44 162

46 163 *Step 3: Outside-facility ART initiation + Male-Specific Counseling:* Men who are not engaged after Step 2  
47  
48 164 (either have not (re-)initiated ART  $\leq 14$  days after moving to Step 2 or did (re-)initiate but are  $\geq 7$ -days late  
49  
50 165 for a follow-up ART appointment) will be offered outside-facility ART by a male nurse certified in HIV  
51  
52 166 counseling. Steps will follow those outlined in the High Intensity Arm, with a brief counseling session,  
53  
54 167 WHO staging, same-day ART re-initiation for those WHO stage 1 or 2, and facility navigation for their 4-  
55  
56 168 week follow-up appointment.

55 169



1  
2  
3 170 [Figure 1 here]  
4

5 171

6 172 **Trial setting**

7  
8 173 The study will take place in central and southern Malawi. Malawi has an HIV prevalence of 9.6%<sup>37</sup> and, of  
9 174 the estimated 330,000 men living with HIV in the country, 54,500 are not in care.<sup>38</sup> Men in Malawi live in  
10 175 primarily rural settings, are self-employed, subsistence farmers, the minority have regular access to a private  
11 176 phone, and most are highly mobile.<sup>39,40</sup>  
12  
13 177

14  
15  
16 178 **Population**

17 179 We will recruit men from 13 high-burden health facilities in Malawi, using medical chart reviews to identify  
18 180 men living with HIV who are not engaged in HIV care. Study facilities will vary by facility type  
19 181 (hospital/health center), management (public/mission), location (rural/urban), and region (central/southern  
20 182 Malawi).  
21  
22 183

23  
24 184 Eligibility criteria for men include: (1)  $\geq 15$  years of age; (2) live in facility catchment area; and (3) tested  
25 185 HIV-positive and either (a) self-report having not yet initiated ART within 7-days of testing HIV-positive,  
26 186 (b) initiated ART but are at risk of immediate default (i.e.,  $\geq 7$ -days late for their 30-day ART refill  
27 187 appointment), or (c) initiated ART and attended their first refill appointment but later defaulted (i.e.  $\geq 28$ -  
28 188 days late to care). For those who never initiated ART and do not have proof of a confirmatory HIV test,  
29 189 study staff will offer an HIV self-test kit prior to enrollment, to confirm a positive HIV status. Those who  
30 190 choose to initiate ART will receive the standard Determine and Unigold confirmatory tests prior to ART  
31 191 initiation, following routine care.  
32  
33 192

34  
35  
36 193 **Study outcomes**

37  
38 194 The primary outcome is the proportion of men who are retained in ART care 6-months after (re-)  
39 195 engagement. Secondary outcomes include: (1) ART initiation; (2) adverse events experienced by men or  
40 196 their female partners (i.e., unwanted disclosure, end of relationship, or intimate partner violence (IPV);  
41 197 (3) intervention acceptability; and (4) cost-effectiveness. ART retention outcomes will be measured  
42 198 through medical chart reviews, while secondary outcomes will be measured through self-reports. Process  
43 199 outcomes include: (1) the proportion of men who were successfully traced; (2) the proportion of eligible  
44 200 men who consented to participate; (3) men's experience with the intervention; and (4) the quality of the  
45 201 intervention.  
46  
47 202

48  
49  
50 203 **Sample size considerations**  
51  
52  
53  
54  
55  
56  
57  
58  
59  
60



1  
2  
3 204 We powered the study to detect differences in 6-month retention between Stepped and Low-Intensity Arms,  
4 205 and the Stepped and High-Intensity Arms. Based on pilot data, we assumed that 40% of men in the Low-  
5 206 Intensity Arm, 60% in the Stepped Arm, and 80% in the High-Intensity Arm will engage in ART and be  
6 207 retained at 6-months. Any man lost to follow-up will be treated as a failure for the outcome evaluation.  
7  
8 208 With 181 men per arm and 20% loss to follow-up from the study in all arms, the power for detecting the  
9 209 specified differences between Stepped and Low Intensity arms and between Stepped and High-Intensity  
10 210 arms will be 0.8, with test level 0.025 after Bonferroni adjustment for two comparisons. We will have 0.99  
11 211 power to detect specified differences between Low Intensity and High Intensity arms. The calculation is  
12 212 based on asymptotic normality of log odds ratio.<sup>41</sup> We need to enroll and randomize 181 men per arm (a  
13 213 total of 543 men living with HIV).  
14  
15  
16  
17  
18  
19  
20

### 21 215 **Data Collection**

22 216 Study recruitment, enrollment, and data collection will be conducted by study staff, who are distinct from  
23 217 local HCWs implementing the interventions.  
24  
25

### 26 218 27 219 **Recruitment**

28 220 Men will be identified through both medical register reviews and in-person recruitment at participating  
29 221 health facilities. Various medical charts will be reviewed to identify different types of eligible men: HIV  
30 222 testing and counseling (HTC) to identify men who tested HIV positive but never initiated ART; client  
31 223 follow-up registers to identify those who initiated but never returned for their first ART appointment, or  
32 224 those who defaulted from care; and index counseling and testing (ICT) registers to identify male partners  
33 225 of female ART clients (Figure 2). In-person recruitment will involve screening men at outpatient  
34 226 departments (OPD) because our previous research has found that men in Malawi frequent OPD settings  
35 227 for health needs,<sup>17</sup> and our formative work suggests that men who disengage from ART services still  
36 228 frequent the OPD for care. In-person recruitment will be used for all client types.  
37  
38  
39  
40  
41  
42  
43

44 230 [Figure 2 here]  
45  
46

### 47 232 **Tracing and Eligibility Screening**

48 233 Study staff will trace potential participants identified through medical chart reviews via phone (if  
49 234 available) or home visits based on tracing data provided in medical documentation. All potential  
50 235 participants will be traced up to three times before being considered lost to follow-up. All screening and  
51 236 enrollment processes will take place in-person.  
52  
53  
54  
55

56 237  
57  
58  
59  
60

### 238 ***Consent, Enrollment, and Baseline Survey***

239 Men who are eligible for the study will complete written informed consent and complete a baseline  
240 survey immediately following enrollment. The baseline survey will collect data on key demographic  
241 variables (marital status, number of children, employment, self-rated health) and previous engagement  
242 with HIV and non-HIV health services. All surveys will be conducted in the local language (Chichewa)  
243 by trained study staff using electronic tablets. Surveys will be programmed using SurveyCTO software  
244 (<http://www.surveyccto.com>).

### 246 ***Follow-Up Data***

247 Study staff will administer follow-up surveys at 2- and 4-months after enrollment. Follow-up surveys  
248 will measure exposure to (and acceptability of) the interventions, changes in key demographics since  
249 enrollment (i.e., marital status, number of children, employment, self-rated health), any adverse events  
250 since enrollment (i.e., unwanted status disclosure, termination of relationship due to the intervention), and  
251 use of ART services. The location and specific time of the follow-up survey will be based on participant  
252 preference.

254 Medical chart reviews will be conducted to assess men's engagement with ART services 6-months after  
255 study enrollment. Individuals without a medical chart outcome will be followed-up in person and their  
256 health passport, a pocket medical record where providers record data during health visits, will be  
257 reviewed to collect the ART outcome. Men who cannot be reached or are lost to follow-up in any arm  
258 will be counted as failures for that specific ART outcome of interest: (re-)initiation or 6-month retention).

### 260 ***Patient and Public Involvement***

261 Extensive formative work informed the development of the study protocol including in-depth interviews,  
262 focus group discussions, and a systematic literature review. The study protocol and tools were presented  
263 to Ministry of Health, national stakeholders and implementing partners (see Supporting Information S2).

### 265 ***Cost data***

266 The average cost per successful outcome (6-month retention) will be calculated and compared across  
267 arms incrementally. We will use micro-costing methods by creating an inventory of the resources used to  
268 achieve the observed study outcomes including: (1) standard counseling interactions (staff cadre, training  
269 received, duration of interaction and distance from facility travelled where applicable); (2) motivational  
270 interviewing interactions (staff cadre, training received, duration of interaction and distance from facility  
271 travelled where applicable); (3) provider interactions (staff cadre, training received, duration of

1  
2  
3 272 interaction and distance from facility travelled where applicable); and (4) cost of reminder messages sent,  
4 273 when messages are delivered telephonically instead of in person. For each study patient, the quantity  
5 274 (number of units) of resources used will be determined. Costs will be measured from the health care  
6 275 provider perspective. Unit costs of resources, which are not human subject data, will be obtained from  
7 276 external suppliers and the health facilities' finance and procurement records and multiplied by the  
8 277 resource usage data to provide an average cost per study patient in each study arm. A cost-effectiveness  
9 278 analysis will be conducted by dividing the incremental cost between two arms by the incremental  
10 279 effectiveness (number of people retained at 6-months) in the respective arms.  
11  
12  
13  
14  
15

16 280

### 17 281 **Analysis plan**

18 282 Data analysis will be conducted in R: A Language and Environment for Statistical Computing (R  
19 283 Foundation for Statistical Computing). We will use the Consolidated Standards of Reporting Trials  
20 284 (CONSORT) standards for reporting trial outcomes.<sup>42</sup> Using an intention-to-treat analysis, all randomized  
21 285 men will be included in the analysis of the primary outcome; men with missing outcomes due to loss to  
22 286 follow-up will be treated as outcome failures. We will calculate descriptive statistics, including mean,  
23 287 standard deviation, range, and frequency distributions for the demographic characteristics and study  
24 288 outcomes by study arm. The primary outcome and all other binary outcomes will be analyzed by logistic  
25 289 regression models with age, marital status, health care facility and other key sociodemographic variables  
26 290 included as covariates. The intervention effects will be tested by Wald tests of the relevant regression  
27 291 parameters. The hypotheses of no difference between the stepped arm and the low/high intensity arm will  
28 292 be rejected if the p-value is smaller than 0.025 (Bonferroni adjustment). Confidence intervals for odds  
29 293 ratios comparing the stepped arm to the low intensity and high intensity arms with coverage probabilities  
30 294 0.975 will be calculated by profile likelihood methods. Due to the Bonferroni adjustment, the  
31 295 simultaneous coverage probability of both intervals will be at least 0.95. To address the secondary  
32 296 objectives, more elaborate logistic regression models will be built for each of the binary outcomes with  
33 297 available individual-, community-, and facility-level factors included as covariates in addition to the  
34 298 intervention status.  
35  
36  
37  
38  
39  
40  
41  
42  
43  
44  
45

46 299

### 47 300 ***Nested studies***

48 301 A series of nested, mixed methods studies will be conducted to identify factors associated with ART  
49 302 engagement within each intervention arm, and to explore the implementation and acceptability of  
50 303 interventions.  
51  
52  
53  
54

55 304

### 56 305 ***Qualitative data collection***

1  
2  
3 306 We will conduct in-depth interviews with a random subset of 40 male participants per arm (120 total)  
4 307 throughout the study period. Clients will be randomly selected at various times of the study using  
5 308 computer-generated randomization, stratifying the sample by arm and successful trial outcomes (i.e., did  
6 309 clients re-initiate ART and/or reach 6-month retention). Data will assess characteristics of men who fail to  
7 310 engage in care, contextualize decisions around ART initiation and retention, and identify additional  
8 311 strategies that may be needed for men to successfully engage and be retained in ART programs (see  
9 312 Supporting Information 3). Data collection tools and analysis plans will be informed by the Andersen's  
10 313 Emerging Model of Health Services Use, phase 4<sup>43</sup> that examines multi-level factors that influence health  
11 314 outcomes. Specifically, it examines the interaction of: 1) environment and structure of health services; 2)  
12 315 clients' enabling resources; and 3) clients' perceived need/motivation to access services. Qualitatively  
13 316 understanding how the IDEaL interventions influence these levels, and what barriers still remain, will  
14 317 help refine future interventions.

15 318  
16 319 Interviews will be conducted by a trained male interviewer in the local language. Interviews will be  
17 320 digitally recorded, transcribed, and translated into English for analysis. Investigators will pilot a codebook  
18 321 by independently reading and coding a randomly-selected subset of transcripts. Through an iterative  
19 322 consultative process, each investigator will revise their respective codebook until there is high interrater  
20 323 reliability among the group. All transcripts will be coded in Atlas.ti v8.3<sup>44</sup> and text analyzed using  
21 324 constant comparison methods<sup>45</sup> to compare and contrast themes that arise within and between  
22 325 interventions and trial outcomes.

### 23 326 24 327 *Implementation Log Sheet*

25 328 During the course of the intervention, HCWs will keep daily logs as one of the study monitoring and  
26 329 evaluation tools to assess the implementation of the intervention for each participant. Primary events to be  
27 330 recorded in the daily logs are: (1) unable to reach participant (and reason); (2) contacted participant; (3)  
28 331 intervention provided (and notes about the challenges and successes of the interaction); and (4) other  
29 332 comments relevant to intervention implementation. Each event will be recorded with a corresponding  
30 333 date. Logs will be digitized in English. Findings may influence how similar interventions are  
31 334 implemented in the future.

### 32 335 33 336 **Ethics and Dissemination**

34 337 The IDEaL trial is registered with ClinicalTrials.gov as NCT05137210. The protocol was approved by the  
35 338 Institutional Review Board of the University of California, Los Angeles and the National Health Sciences  
36 339 Research Council in Malawi. Study findings will be disseminated through peer-reviewed journal articles,

340 national and international conference presentations, and meetings with Malawi Ministry of Health,  
341 facility, and community stakeholders.

342

## 343 DISCUSSION

344 Studies have reported poorer outcomes for HIV testing, treatment initiation, and treatment adherence in  
345 men compared to women<sup>2</sup> for over a decade.<sup>46,47</sup> Men are often portrayed as difficult, hard-to-reach, and  
346 actively avoiding health facilities. In IDEaL, we aim to investigate whether men really are hard-to-reach  
347 or, will men engage in care when services are offered in ways that are accessible to them and resonate  
348 with their needs, as growing evidence suggests.<sup>17</sup> We propose to test a Stepped intervention that increases  
349 in intensity over time against Low- and High-intensity interventions – all tailored to men – to identify the  
350 most cost effective strategy to (re-)initiate men in HIV treatment services in Malawi.

351

352 IDEaL is different from other ART engagement and re-engagement interventions in several important  
353 ways. First, we will enroll men living with HIV across the treatment cascade, including those who have  
354 never initiated ART, those who are at risk of immediate default after initiation, and those who have been  
355 in care but subsequently default. Formative research suggests that barriers to ART initiation and re-  
356 initiation may be similar,<sup>48</sup> however most interventions focus specifically on either first-time initiation or  
357 re-engagement, but not both. Our study will assess if one overarching program can improve men's  
358 engagement across the treatment cascade, regardless of whether they are starting ART for the first time or  
359 returning to care after a period of disengagement. One overarching intervention may be more scalable  
360 than multiple, separate interventions across the cascade. Second, we tailor interventions to men's unique  
361 needs and motivations, based on extensive formative work. While innovative interventions for men are  
362 underway,<sup>25–27</sup> few have rigorously tested the impact of male-tailored interventions on ART  
363 engagement.<sup>49</sup>

364

365 Finally, we will test a Stepped intervention that builds in intensity over time until men (re-)initiate in care.  
366 This approach allows men who are ready to (re-)initiate to do so at minimal cost to the health system,  
367 while those who need additional support can receive more resource-intensive interventions to support  
368 their ART engagement.<sup>31</sup> Stepped interventions have been effective in other settings and can address  
369 multiple barriers faced by the target population with minimal cost.<sup>31,32</sup> Findings from IDEaL will provide  
370 crucial knowledge to how best men can be reached and can inform intervention scale-up.

371

372 **Contributorship statement:** KD and AC conceptualized the study. KD is responsible for funding  
373 acquisition. KD, KB, JH, KP, BN, RH and AC developed study protocol and materials. JH, KB, KP, and

1  
2  
3 374 EC will implement the study. KD, MK, KB, TC, BN, LL, TC, and AC developed the analysis plan and  
4 375 KD, MK, KB, and AC will analyze the data. KD and EC wrote the first draft and KB, JH, KP, BN, LL,  
5 376 RH, SP, EC, RH, TC, and AC edited following drafts. All authors have read and approved the final  
6 377 manuscript.  
7  
8 378

9  
10  
11 379 **Competing interests:** The authors declare that they have no competing interests.  
12

13 380 **Funding:** The work was supported by the Bill and Melinda Gates Foundation grant number INV-001423.  
14 381 KD was supported by National Institute of Mental Health of the National Institutes of Health grant  
15 382 number R01-MH122308, Fogarty International grant number K01-TW011484-01 and UCLA GSTTP  
16 383 (grant number N/A). LL was supported by the National Institute of Mental Health of the National  
17 384 Institutes of Health under grant number K01MH119923. The content is solely the responsibility of the  
18 385 authors and does not necessarily represent the official views of the National Institutes of Health.  
19  
20 386

21 387 **Acknowledgements:** We wish to thank the Malawi Ministry of Health for their support of this trial. We  
22 388 would also like to acknowledge Joep van Oosterhout, Misheck Mphande, Isabella Robson, Thoko Banda,  
23 389 Peter Mwamlima, and Eric Lungu for their contributions to protocol development and for their support of  
24 390 study implementation.  
25  
26  
27  
28  
29  
30  
31  
32  
33  
34  
35  
36  
37  
38  
39  
40  
41  
42  
43  
44  
45  
46  
47  
48  
49  
50  
51  
52  
53  
54  
55  
56  
57  
58  
59  
60



## REFERENCES

1. Cornell M, Majola M, Johnson LF, Dubula-Majola V. HIV services in sub-Saharan Africa: the greatest gap is men. *The Lancet*. 2021;397(10290):2130-2132.
2. AIDSinfo | UNAIDS. Accessed February 21, 2023. <https://aidsinfo.unaids.org/>
3. Druyts E, Dybul M, Kanters S, et al. Male sex and the risk of mortality among individuals enrolled in antiretroviral therapy programs in Africa: a systematic review and meta-analysis. *Aids*. 2013;27(3):417-425.
4. Ehrenkranz P, Rosen S, Boulle A, et al. The revolving door of HIV care: Revising the service delivery cascade to achieve the UNAIDS 95-95-95 goals. *PLoS Medicine*. 2021;18(5):e1003651.
5. Grimrud A, Wilkinson L, Eshun-Wilson I, Holmes C, Sikazwe I, Katz IT. Understanding engagement in HIV programmes: how health services can adapt to ensure no one is left behind. *Current HIV/AIDS Reports*. 2020;17:458-466.
6. Kranzer K, Lewis JJ, Ford N, et al. Treatment interruption in a primary care antiretroviral therapy programme in South Africa: cohort analysis of trends and risk factors. *Journal of acquired immune deficiency syndromes (1999)*. 2010;55(3):e17.
7. Mee P, Rice B, Lemsalu L, et al. Changes in patterns of retention in HIV care and antiretroviral treatment in Tanzania between 2008 and 2016: an analysis of routinely collected national programme data. *Journal of global health*. 2019;9(1).
8. Tomescu S, Crompton T, Adebayo J, et al. Factors associated with an interruption in treatment of people living with HIV in USAID-supported states in Nigeria: a retrospective study from 2000–2020. *BMC public health*. 2021;21:1-8.
9. Nakiwogga-Muwanga A, Musaazi J, Katabira E, Worodria W, Talisuna SA, Colebunders R. Patients who return to care after tracking remain at high risk of attrition: experience from a large HIV clinic, Uganda. *International journal of STD & AIDS*. 2015;26(1):42-47.
10. Teklu AM, Yirdaw KD. Patients who restart antiretroviral medication after interruption remain at high risk of unfavorable outcomes in Ethiopia. *BMC Health Services Research*. 2017;17(1):1-8.
11. Lopez-Varela E, Augusto O, Fuente-Soro L, et al. Quantifying the gender gap in the HIV care cascade in southern Mozambique: We are missing the men. *Plos one*. 2021;16(2):e0245461.
12. Mody A, Eshun-Wilson I, Sikombe K, et al. Longitudinal engagement trajectories and risk of death among new ART starters in Zambia: A group-based multi-trajectory analysis. *PLOS medicine*. 2019;16(10):e1002959.
13. Gosset A, Protopopescu C, Larmarange J, et al. Retention in care trajectories of HIV-positive individuals participating in a universal test-and-treat program in rural South Africa (ANRS 12249 TasP Trial). *Journal of Acquired Immune Deficiency Syndromes (1999)*. 2019;80(4):375.
14. Monod M, Brizzi A, Galiwango RM, et al. Growing gender disparity in HIV infection in Africa: sources and policy implications. *medRxiv*. Published online 2023:2023-03.
15. Esacove AW. Good sex/bad sex: the individualised focus of US HIV prevention policy in sub-Saharan Africa, 1995–2005. *Sociology of health & illness*. 2013;35(1):33-48.
16. Poulin M, Dovel K, Watkins SC. Men with money and the “vulnerable women” client category in an AIDS epidemic. *World Development*. 2016;85:16-30.
17. Dovel K, Balakasi K, Gupta S, et al. Frequency of visits to health facilities and HIV services offered to men, Malawi. *Bulletin of the World Health Organization*. 2021;99(9):618.
18. Chamberlin S, Mphande M, Phiri K, Kalande P, Dovel K. How HIV Clients Find Their Way Back to the ART Clinic: A Qualitative Study of Disengagement and Re-engagement with HIV Care in Malawi. *AIDS and Behavior*. 2022;26(3):674-685.
19. Dovel K, Dworkin SL, Cornell M, Coates TJ, Yeatman S. Gendered health institutions: examining the organization of health services and men’s use of HIV testing in Malawi. *Journal of the International AIDS Society*. 2020;23:e25517.

- 1
  - 2
  - 3
  - 4
  - 5
  - 6
  - 7
  - 8
  - 9
  - 10
  - 11
  - 12
  - 13
  - 14
  - 15
  - 16
  - 17
  - 18
  - 19
  - 20
  - 21
  - 22
  - 23
  - 24
  - 25
  - 26
  - 27
  - 28
  - 29
  - 30
  - 31
  - 32
  - 33
  - 34
  - 35
  - 36
  - 37
  - 38
  - 39
  - 40
  - 41
  - 42
  - 43
  - 44
  - 45
  - 46
  - 47
  - 48
  - 49
  - 50
  - 51
  - 52
  - 53
  - 54
  - 55
  - 56
  - 57
  - 58
  - 59
  - 60
20. Yeatman S, Chamberlin S, Dovel K. Women's (health) work: a population-based, cross-sectional study of gender differences in time spent seeking health care in Malawi. *PLoS One*. 2018;13(12):e0209586.
21. Colvin CJ. Strategies for engaging men in HIV services. *The Lancet HIV*. 2019;6(3):e191-e200.
22. Phiri K, McBride K, Moucheraud C, et al. Community and health system factors associated with antiretroviral therapy initiation among men and women in Malawi: a mixed methods study exploring gender-specific barriers to care. *International health*. 2021;13(3):253-261.
23. Ware NC, Wyatt MA, Geng EH, et al. Toward an understanding of disengagement from HIV treatment and care in sub-Saharan Africa: a qualitative study. *PLoS medicine*. 2013;10(1):e1001369.
24. Layer EH, Brahmabhatt H, Beckham SW, et al. "I pray that they accept me without scolding." Experiences with disengagement and re-engagement in HIV care and treatment services in Tanzania. *AIDS patient care and STDs*. 2014;28(9):483-488.
25. Bell J, Sharma S, Malone S, et al. Targeting interventions for HIV testing and treatment uptake: an attitudinal and behavioural segmentation of men aged 20–34 in KwaZulu-Natal and Mpumalanga, South Africa. *PloS one*. 2021;16(3):e0247483.
26. van Rooyen H, Makusha T, Joseph P, et al. Zwakala Ndoda: a cluster and individually randomized trial aimed at improving testing, linkage, and adherence to treatment for hard-to reach men in KwaZulu-Natal, South Africa. *Trials*. 2019;20(1):1-14.
27. MenStar Coalition | Ending AIDS for all. MenStar Coalition. Accessed March 15, 2023. <https://www.menstarcoalition.org/>
28. Grimsrud A, Bygrave H, Doherty M, et al. Reimagining HIV service delivery: the role of differentiated care from prevention to suppression. *Journal of the International AIDS Society*. 2016;19(1).
29. Duncombe C, Rosenblum S, Hellmann N, et al. Reframing HIV care: putting people at the centre of antiretroviral delivery. *Tropical Medicine & International Health*. 2015;20(4):430-447.
30. Hagey JM, Li X, Barr-Walker J, et al. Differentiated HIV care in sub-Saharan Africa: a scoping review to inform antiretroviral therapy provision for stable HIV-infected individuals in Kenya. *AIDS care*. 2018;30(12):1477-1487.
31. Bower P, Gilbody S. Stepped care in psychological therapies: access, effectiveness and efficiency: narrative literature review. *The British Journal of Psychiatry*. 2005;186(1):11-17.
32. McNairy ML, Lamb MR, Gachuhi AB, et al. Effectiveness of a combination strategy for linkage and retention in adult HIV care in Swaziland: The Link4Health cluster randomized trial. *PLoS medicine*. 2017;14(11):e1002420.
33. Hubbard J, Mphande M, Robson I, Balakasi K, Phiri K. Core components of male-specific person-centered care: a qualitative analysis from client and healthcare worker perspectives in Malawi. In: ; 2023.
34. Miller WR, Rose GS. Toward a theory of motivational interviewing. *American psychologist*. 2009;64(6):527.
35. Rollnick S, Miller WR, Butler CC, Aloia MS. Motivational interviewing in health care: helping patients change behavior. Published online 2008.
36. Hill S, Kavookjian J. Motivational interviewing as a behavioral intervention to increase HAART adherence in patients who are HIV-positive: a systematic review of the literature. *AIDS care*. 2012;24(5):583-592.
37. Focus on: Malawi | UNAIDS. Accessed March 15, 2023. [https://www.unaids.org/en/20190402\\_country\\_focus\\_Malawi](https://www.unaids.org/en/20190402_country_focus_Malawi)
38. Malawi | UNAIDS. Accessed March 15, 2023. <https://www.unaids.org/en/regionscountries/countries/malawi>
39. Feldacker C, Emch M, Ennett S. The who and where of HIV in rural Malawi: Exploring the effects of person and place on individual HIV status. *Health & place*. 2010;16(5):996-1006.
40. Mandiwa C, Namondwe B. Uptake and correlates of HIV testing among men in Malawi: evidence from a national population-based household survey. *BMC health services research*. 2019;19:1-8.



41. Jewell NP. *Statistics for Epidemiology*. CRC press; 2003.
42. Schulz KF, Altman DG, Moher D. CONSORT 2010 statement: Updated guidelines for reporting parallel group randomized trials. *Annals of Internal Medicine*. 2011;154(4):291-292.
43. Andersen RM. National health surveys and the behavioral model of health services use. *Medical care*. Published online 2008:647-653.
44. ATLAS.ti 9 [computer program].
45. Glaser BG. The constant comparative method of qualitative analysis. *Social problems*. 1965;12(4):436-445.
46. Higgins JA, Hoffman S, Dworkin SL. Rethinking gender, heterosexual men, and women's vulnerability to HIV/AIDS. *American journal of public health*. 2010;100(3):435-445.
47. Braitstein P, Boulle A, Nash D, et al. Gender and the use of antiretroviral treatment in resource-constrained settings: findings from a multicenter collaboration. *Journal of women's health*. 2008;17(1):47-55.
48. Coursey K, Kalande P, Phiri K, Chamberlin S, Coates T, Dovel K. Developing intervention strategies to improve ART program initiation and retention among HIV-positive men in Malawi.
49. Kusemererwa S, Akena D, Nakanjako D, et al. Strategies for retention of heterosexual men in HIV care in sub-Saharan Africa: a systematic review. *PloS one*. 2021;16(2):e0246471.

## FIGURE LEGEND

Figure 1: Trial Design

Figure 2: Recruitment sources and ART disengagement criteria by recruitment type

## SUPPORTING INFORMATION

Supporting Information 1: Spirit Checklist

Supporting Information 2: Approved protocol

Supporting Information 3: In-depth interview guides

Figure 1: Trial Design

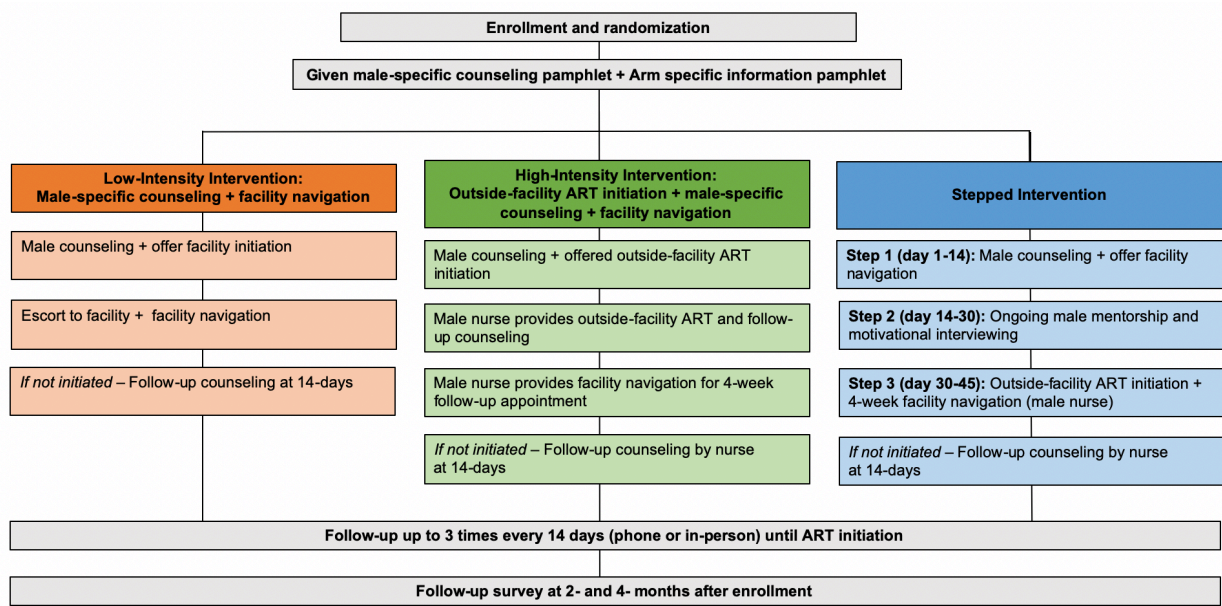

Fig 2. Recruitment sources and ART disengagement criteria by recruitment type

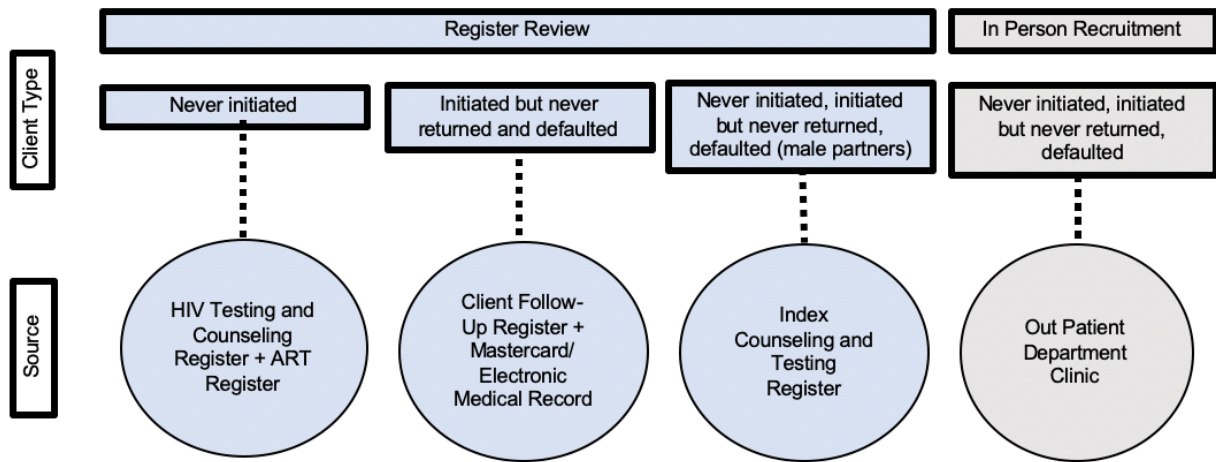

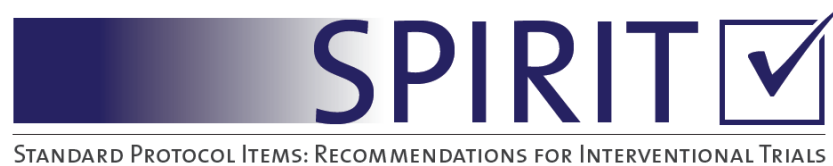

SPIRIT 2013 Checklist: Recommended items to address in a clinical trial protocol and related documents\*

| Section/item                      | Item No | Description                                                                                                                                                                                                                                                                              | Addressed on page number |
|-----------------------------------|---------|------------------------------------------------------------------------------------------------------------------------------------------------------------------------------------------------------------------------------------------------------------------------------------------|--------------------------|
| <b>Administrative information</b> |         |                                                                                                                                                                                                                                                                                          |                          |
| Title                             | 1       | Descriptive title identifying the study design, population, interventions, and, if applicable, trial acronym                                                                                                                                                                             | ___ 1 ___                |
| Trial registration                | 2a      | Trial identifier and registry name. If not yet registered, name of intended registry                                                                                                                                                                                                     | ___ 1, 15 ___            |
|                                   | 2b      | All items from the World Health Organization Trial Registration Data Set                                                                                                                                                                                                                 | ___ n/a ___              |
| Protocol version                  | 3       | Date and version identifier                                                                                                                                                                                                                                                              | ___ 2 ___                |
| Funding                           | 4       | Sources and types of financial, material, and other support                                                                                                                                                                                                                              | ___ 19 ___               |
| Roles and responsibilities        | 5a      | Names, affiliations, and roles of protocol contributors                                                                                                                                                                                                                                  | ___ 18-19 ___            |
|                                   | 5b      | Name and contact information for the trial sponsor                                                                                                                                                                                                                                       | ___ 19 ___               |
|                                   | 5c      | Role of study sponsor and funders, if any, in study design; collection, management, analysis, and interpretation of data; writing of the report; and the decision to submit the report for publication, including whether they will have ultimate authority over any of these activities | ___ 19 ___               |
|                                   | 5d      | Composition, roles, and responsibilities of the coordinating centre, steering committee, endpoint adjudication committee, data management team, and other individuals or groups overseeing the trial, if applicable (see Item 21a for data monitoring committee)                         | ___ n/a ___              |

1 **Introduction**

2

3 Background and 6a Description of research question and justification for undertaking the trial, including summary of relevant 4-5  
 4 rationale studies (published and unpublished) examining benefits and harms for each intervention  
 5

6 6b Explanation for choice of comparators  
 7 \_\_\_\_\_

8 Objectives 7 Specific objectives or hypotheses  
 9 \_\_\_\_\_ 5 \_\_\_\_\_

10 Trial design 8 Description of trial design including type of trial (eg, parallel group, crossover, factorial, single group),  
 11 allocation ratio, and framework (eg, superiority, equivalence, noninferiority, exploratory)  
 12 \_\_\_\_\_ 5 \_\_\_\_\_

13

14 **Methods: Participants, interventions, and outcomes**

15

16 Study setting 9 Description of study settings (eg, community clinic, academic hospital) and list of countries where data will  
 17 be collected. Reference to where list of study sites can be obtained  
 18 \_\_\_\_\_ 9-10 \_\_\_\_\_

19 Eligibility criteria 10 Inclusion and exclusion criteria for participants. If applicable, eligibility criteria for study centres and  
 20 individuals who will perform the interventions (eg, surgeons, psychotherapists)  
 21 \_\_\_\_\_ 10 \_\_\_\_\_

22

23 Interventions 11a Interventions for each group with sufficient detail to allow replication, including how and when they will be  
 24 administered  
 25 \_\_\_\_\_ 6-9 \_\_\_\_\_

26 11b Criteria for discontinuing or modifying allocated interventions for a given trial participant (eg, drug dose  
 27 change in response to harms, participant request, or improving/worsening disease)  
 28 \_\_\_\_\_ n/a \_\_\_\_\_

29 11c Strategies to improve adherence to intervention protocols, and any procedures for monitoring adherence  
 30 (eg, drug tablet return, laboratory tests)  
 31 \_\_\_\_\_ n/a \_\_\_\_\_

32 11d Relevant concomitant care and interventions that are permitted or prohibited during the trial  
 33 \_\_\_\_\_ n/a \_\_\_\_\_

34 Outcomes 12 Primary, secondary, and other outcomes, including the specific measurement variable (eg, systolic blood  
 35 pressure), analysis metric (eg, change from baseline, final value, time to event), method of aggregation  
 36 (eg, median, proportion), and time point for each outcome. Explanation of the clinical relevance of chosen  
 37 efficacy and harm outcomes is strongly recommended  
 38 \_\_\_\_\_ 10 \_\_\_\_\_

39

40 Participant timeline 13 Time schedule of enrolment, interventions (including any run-ins and washouts), assessments, and visits  
 41 for participants. A schematic diagram is highly recommended (see Figure)  
 42 \_\_\_\_\_ 6,8-9, 11-12 \_\_\_\_\_

43

44

45

46

|   |             |    |                                                                                                                                                                                       |               |
|---|-------------|----|---------------------------------------------------------------------------------------------------------------------------------------------------------------------------------------|---------------|
| 1 | Sample size | 14 | Estimated number of participants needed to achieve study objectives and how it was determined, including clinical and statistical assumptions supporting any sample size calculations | ___ 10-11 ___ |
| 2 |             |    |                                                                                                                                                                                       |               |
| 3 |             |    |                                                                                                                                                                                       |               |
| 4 | Recruitment | 15 | Strategies for achieving adequate participant enrolment to reach target sample size                                                                                                   | ___ 11-12 ___ |
| 5 |             |    |                                                                                                                                                                                       |               |

### 6 **Methods: Assignment of interventions (for controlled trials)**

#### 7 Allocation:

|    |                    |     |                                                                                                                                                                                                                                                                                                                                                          |             |
|----|--------------------|-----|----------------------------------------------------------------------------------------------------------------------------------------------------------------------------------------------------------------------------------------------------------------------------------------------------------------------------------------------------------|-------------|
| 8  |                    |     |                                                                                                                                                                                                                                                                                                                                                          |             |
| 9  |                    |     |                                                                                                                                                                                                                                                                                                                                                          |             |
| 10 | Sequence           | 16a | Method of generating the allocation sequence (eg, computer-generated random numbers), and list of any factors for stratification. To reduce predictability of a random sequence, details of any planned restriction (eg, blocking) should be provided in a separate document that is unavailable to those who enrol participants or assign interventions | ___ 5-6 ___ |
| 11 | generation         |     |                                                                                                                                                                                                                                                                                                                                                          |             |
| 12 |                    |     |                                                                                                                                                                                                                                                                                                                                                          |             |
| 13 |                    |     |                                                                                                                                                                                                                                                                                                                                                          |             |
| 14 |                    |     |                                                                                                                                                                                                                                                                                                                                                          |             |
| 15 |                    |     |                                                                                                                                                                                                                                                                                                                                                          |             |
| 16 | Allocation         | 16b | Mechanism of implementing the allocation sequence (eg, central telephone; sequentially numbered, opaque, sealed envelopes), describing any steps to conceal the sequence until interventions are assigned                                                                                                                                                | ___ 5-6 ___ |
| 17 | concealment        |     |                                                                                                                                                                                                                                                                                                                                                          |             |
| 18 | mechanism          |     |                                                                                                                                                                                                                                                                                                                                                          |             |
| 19 |                    |     |                                                                                                                                                                                                                                                                                                                                                          |             |
| 20 | Implementation     | 16c | Who will generate the allocation sequence, who will enrol participants, and who will assign participants to interventions                                                                                                                                                                                                                                | ___ 5 ___   |
| 21 |                    |     |                                                                                                                                                                                                                                                                                                                                                          |             |
| 22 |                    |     |                                                                                                                                                                                                                                                                                                                                                          |             |
| 23 |                    |     |                                                                                                                                                                                                                                                                                                                                                          |             |
| 24 | Blinding (masking) | 17a | Who will be blinded after assignment to interventions (eg, trial participants, care providers, outcome assessors, data analysts), and how                                                                                                                                                                                                                | ___ 6 ___   |
| 25 |                    |     |                                                                                                                                                                                                                                                                                                                                                          |             |
| 26 |                    |     |                                                                                                                                                                                                                                                                                                                                                          |             |
| 27 |                    | 17b | If blinded, circumstances under which unblinding is permissible, and procedure for revealing a participant's allocated intervention during the trial                                                                                                                                                                                                     | ___ n/a ___ |
| 28 |                    |     |                                                                                                                                                                                                                                                                                                                                                          |             |
| 29 |                    |     |                                                                                                                                                                                                                                                                                                                                                          |             |
| 30 |                    |     |                                                                                                                                                                                                                                                                                                                                                          |             |

### 31 **Methods: Data collection, management, and analysis**

|    |                 |     |                                                                                                                                                                                                                                                                                                                                                                                                              |            |
|----|-----------------|-----|--------------------------------------------------------------------------------------------------------------------------------------------------------------------------------------------------------------------------------------------------------------------------------------------------------------------------------------------------------------------------------------------------------------|------------|
| 32 |                 |     |                                                                                                                                                                                                                                                                                                                                                                                                              |            |
| 33 | Data collection | 18a | Plans for assessment and collection of outcome, baseline, and other trial data, including any related processes to promote data quality (eg, duplicate measurements, training of assessors) and a description of study instruments (eg, questionnaires, laboratory tests) along with their reliability and validity, if known. Reference to where data collection forms can be found, if not in the protocol | ___ 12 ___ |
| 34 | methods         |     |                                                                                                                                                                                                                                                                                                                                                                                                              |            |
| 35 |                 |     |                                                                                                                                                                                                                                                                                                                                                                                                              |            |
| 36 |                 |     |                                                                                                                                                                                                                                                                                                                                                                                                              |            |
| 37 |                 |     |                                                                                                                                                                                                                                                                                                                                                                                                              |            |
| 38 |                 | 18b | Plans to promote participant retention and complete follow-up, including list of any outcome data to be collected for participants who discontinue or deviate from intervention protocols                                                                                                                                                                                                                    | ___ 12 ___ |
| 39 |                 |     |                                                                                                                                                                                                                                                                                                                                                                                                              |            |
| 40 |                 |     |                                                                                                                                                                                                                                                                                                                                                                                                              |            |
| 41 |                 |     |                                                                                                                                                                                                                                                                                                                                                                                                              |            |
| 42 |                 |     |                                                                                                                                                                                                                                                                                                                                                                                                              |            |

|    |                                 |     |                                                                                                                                                                                                                                                                                                                                       |                   |
|----|---------------------------------|-----|---------------------------------------------------------------------------------------------------------------------------------------------------------------------------------------------------------------------------------------------------------------------------------------------------------------------------------------|-------------------|
| 1  | Data management                 | 19  | Plans for data entry, coding, security, and storage, including any related processes to promote data quality (eg, double data entry; range checks for data values). Reference to where details of data management procedures can be found, if not in the protocol                                                                     | _____ n/a _____   |
| 2  |                                 |     |                                                                                                                                                                                                                                                                                                                                       |                   |
| 3  |                                 |     |                                                                                                                                                                                                                                                                                                                                       |                   |
| 4  |                                 |     |                                                                                                                                                                                                                                                                                                                                       |                   |
| 5  | Statistical methods             | 20a | Statistical methods for analysing primary and secondary outcomes. Reference to where other details of the statistical analysis plan can be found, if not in the protocol                                                                                                                                                              | _____ 13-14 _____ |
| 6  |                                 |     |                                                                                                                                                                                                                                                                                                                                       |                   |
| 7  |                                 |     |                                                                                                                                                                                                                                                                                                                                       |                   |
| 8  |                                 | 20b | Methods for any additional analyses (eg, subgroup and adjusted analyses)                                                                                                                                                                                                                                                              | _____ 13-14 _____ |
| 9  |                                 |     |                                                                                                                                                                                                                                                                                                                                       |                   |
| 10 |                                 | 20c | Definition of analysis population relating to protocol non-adherence (eg, as randomised analysis), and any statistical methods to handle missing data (eg, multiple imputation)                                                                                                                                                       | _____ 13-14 _____ |
| 11 |                                 |     |                                                                                                                                                                                                                                                                                                                                       |                   |
| 12 |                                 |     |                                                                                                                                                                                                                                                                                                                                       |                   |
| 13 |                                 |     |                                                                                                                                                                                                                                                                                                                                       |                   |
| 14 | <b>Methods: Monitoring</b>      |     |                                                                                                                                                                                                                                                                                                                                       |                   |
| 15 |                                 |     |                                                                                                                                                                                                                                                                                                                                       |                   |
| 16 | Data monitoring                 | 21a | Composition of data monitoring committee (DMC); summary of its role and reporting structure; statement of whether it is independent from the sponsor and competing interests; and reference to where further details about its charter can be found, if not in the protocol. Alternatively, an explanation of why a DMC is not needed | _____ n/a _____   |
| 17 |                                 |     |                                                                                                                                                                                                                                                                                                                                       |                   |
| 18 |                                 |     |                                                                                                                                                                                                                                                                                                                                       |                   |
| 19 |                                 |     |                                                                                                                                                                                                                                                                                                                                       |                   |
| 20 |                                 |     |                                                                                                                                                                                                                                                                                                                                       |                   |
| 21 |                                 |     |                                                                                                                                                                                                                                                                                                                                       |                   |
| 22 |                                 | 21b | Description of any interim analyses and stopping guidelines, including who will have access to these interim results and make the final decision to terminate the trial                                                                                                                                                               | _____ n/a _____   |
| 23 |                                 |     |                                                                                                                                                                                                                                                                                                                                       |                   |
| 24 |                                 |     |                                                                                                                                                                                                                                                                                                                                       |                   |
| 25 | Harms                           | 22  | Plans for collecting, assessing, reporting, and managing solicited and spontaneously reported adverse events and other unintended effects of trial interventions or trial conduct                                                                                                                                                     | _____ 12 _____    |
| 26 |                                 |     |                                                                                                                                                                                                                                                                                                                                       |                   |
| 27 |                                 |     |                                                                                                                                                                                                                                                                                                                                       |                   |
| 28 | Auditing                        | 23  | Frequency and procedures for auditing trial conduct, if any, and whether the process will be independent from investigators and the sponsor                                                                                                                                                                                           | _____ n/a _____   |
| 29 |                                 |     |                                                                                                                                                                                                                                                                                                                                       |                   |
| 30 |                                 |     |                                                                                                                                                                                                                                                                                                                                       |                   |
| 31 |                                 |     |                                                                                                                                                                                                                                                                                                                                       |                   |
| 32 | <b>Ethics and dissemination</b> |     |                                                                                                                                                                                                                                                                                                                                       |                   |
| 33 |                                 |     |                                                                                                                                                                                                                                                                                                                                       |                   |
| 34 | Research ethics approval        | 24  | Plans for seeking research ethics committee/institutional review board (REC/IRB) approval                                                                                                                                                                                                                                             | _____ 15 _____    |
| 35 |                                 |     |                                                                                                                                                                                                                                                                                                                                       | _____             |
| 36 |                                 |     |                                                                                                                                                                                                                                                                                                                                       |                   |
| 37 | Protocol amendments             | 25  | Plans for communicating important protocol modifications (eg, changes to eligibility criteria, outcomes, analyses) to relevant parties (eg, investigators, REC/IRBs, trial participants, trial registries, journals, regulators)                                                                                                      | _____ n/a _____   |
| 38 |                                 |     |                                                                                                                                                                                                                                                                                                                                       |                   |
| 39 |                                 |     |                                                                                                                                                                                                                                                                                                                                       |                   |
| 40 |                                 |     |                                                                                                                                                                                                                                                                                                                                       |                   |
| 41 |                                 |     |                                                                                                                                                                                                                                                                                                                                       |                   |
| 42 |                                 |     |                                                                                                                                                                                                                                                                                                                                       |                   |

|    |                               |     |                                                                                                                                                                                                                                                                                     |      |
|----|-------------------------------|-----|-------------------------------------------------------------------------------------------------------------------------------------------------------------------------------------------------------------------------------------------------------------------------------------|------|
| 1  | Consent or assent             | 26a | Who will obtain informed consent or assent from potential trial participants or authorised surrogates, and how (see Item 32)                                                                                                                                                        | 12   |
| 2  |                               |     |                                                                                                                                                                                                                                                                                     |      |
| 3  |                               |     |                                                                                                                                                                                                                                                                                     |      |
| 4  |                               | 26b | Additional consent provisions for collection and use of participant data and biological specimens in ancillary studies, if applicable                                                                                                                                               | n/a  |
| 5  |                               |     |                                                                                                                                                                                                                                                                                     |      |
| 6  |                               |     |                                                                                                                                                                                                                                                                                     |      |
| 7  | Confidentiality               | 27  | How personal information about potential and enrolled participants will be collected, shared, and maintained in order to protect confidentiality before, during, and after the trial                                                                                                | 5    |
| 8  |                               |     |                                                                                                                                                                                                                                                                                     |      |
| 9  |                               |     |                                                                                                                                                                                                                                                                                     |      |
| 10 | Declaration of interests      | 28  | Financial and other competing interests for principal investigators for the overall trial and each study site                                                                                                                                                                       | 19   |
| 11 |                               |     |                                                                                                                                                                                                                                                                                     |      |
| 12 |                               |     |                                                                                                                                                                                                                                                                                     |      |
| 13 | Access to data                | 29  | Statement of who will have access to the final trial dataset, and disclosure of contractual agreements that limit such access for investigators                                                                                                                                     | n/a  |
| 14 |                               |     |                                                                                                                                                                                                                                                                                     |      |
| 15 |                               |     |                                                                                                                                                                                                                                                                                     |      |
| 16 | Ancillary and post-trial care | 30  | Provisions, if any, for ancillary and post-trial care, and for compensation to those who suffer harm from trial participation                                                                                                                                                       | n/a  |
| 17 |                               |     |                                                                                                                                                                                                                                                                                     |      |
| 18 |                               |     |                                                                                                                                                                                                                                                                                     |      |
| 19 |                               |     |                                                                                                                                                                                                                                                                                     |      |
| 20 | Dissemination policy          | 31a | Plans for investigators and sponsor to communicate trial results to participants, healthcare professionals, the public, and other relevant groups (eg, via publication, reporting in results databases, or other data sharing arrangements), including any publication restrictions | 2,15 |
| 21 |                               |     |                                                                                                                                                                                                                                                                                     |      |
| 22 |                               |     |                                                                                                                                                                                                                                                                                     |      |
| 23 |                               |     |                                                                                                                                                                                                                                                                                     |      |
| 24 |                               | 31b | Authorship eligibility guidelines and any intended use of professional writers                                                                                                                                                                                                      | n/a  |
| 25 |                               |     |                                                                                                                                                                                                                                                                                     |      |
| 26 |                               | 31c | Plans, if any, for granting public access to the full protocol, participant-level dataset, and statistical code                                                                                                                                                                     | n/a  |
| 27 |                               |     |                                                                                                                                                                                                                                                                                     |      |
| 28 |                               |     |                                                                                                                                                                                                                                                                                     |      |
| 29 | <b>Appendices</b>             |     |                                                                                                                                                                                                                                                                                     |      |
| 30 |                               |     |                                                                                                                                                                                                                                                                                     |      |
| 31 | Informed consent materials    | 32  | Model consent form and other related documentation given to participants and authorised surrogates                                                                                                                                                                                  | n/a  |
| 32 |                               |     |                                                                                                                                                                                                                                                                                     |      |
| 33 |                               |     |                                                                                                                                                                                                                                                                                     |      |
| 34 | Biological specimens          | 33  | Plans for collection, laboratory evaluation, and storage of biological specimens for genetic or molecular analysis in the current trial and for future use in ancillary studies, if applicable                                                                                      | n/a  |
| 35 |                               |     |                                                                                                                                                                                                                                                                                     |      |
| 36 |                               |     |                                                                                                                                                                                                                                                                                     |      |

\*It is strongly recommended that this checklist be read in conjunction with the SPIRIT 2013 Explanation & Elaboration for important clarification on the items. Amendments to the protocol should be tracked and dated. The SPIRIT checklist is copyrighted by the SPIRIT Group under the Creative Commons [“Attribution-NonCommercial-NoDerivs 3.0 Unported”](https://creativecommons.org/licenses/by-nc-nd/3.0/) license.



1  
2  
3  
4  
5  
6  
7  
8  
9  
10  
11  
12  
13  
14  
15  
16  
17  
18  
19  
20  
21  
22  
23  
24  
25  
26  
27  
28  
29  
30  
31  
32  
33  
34  
35  
36  
37  
38  
39  
40  
41  
42  
43  
44  
45  
46  
47  
48  
49  
50  
51  
52  
53  
54  
55  
56  
57  
58  
59  
60

Partners in Hope Medical Center

# Identifying efficient linkage strategies for HIV self-testing (IDEaL)

Kathryn Dovel, Principle Investigator  
Partners in Hope  
PO Box 302  
3-6-2019

## ABSTRACT

**Background:** HIV self-testing (HIVST) has been found to be a highly acceptable approach for men to learn of their HIV status and has resulted in increased testing uptake (Dovel 2019, cite Augustines stuff). However, rates of antiretroviral therapy (ART) initiation among those tested with HIVST are difficult to capture and some studies have suggested that linkage rates are low (Ortblad 2017, MacPherson 2014), particularly amongst men. We propose a clinical trial to test varying approaches to ART initiation among men who test HIV-positive through HIVST. We will test three interventions:

*Lightest Touch Intervention (Arm 1):* simple reminders to visit the health facility (given every two weeks);

*Staged Intervention (Arm 2):* a staged intervention that consecutively increases in intensity every month that a participant does not initiate ART (intervals include reminders, motivational interviewing, and home-based ART initiation);

*Intensive Intervention (Arm 3):* home-based ART initiation followed by linkage to the health facility of their choice the following month.

**Objective:** Our primary objective is to identify a cost-effective package for ART initiation among men identified as HIV-positive through HIVST in Malawi. Our specific objectives are:

Objective 1. Evaluate the effectiveness of the Staged ART Intervention vs Lightest Touch Intervention (primary analysis) and the effectiveness of the Staged ART Intervention vs Intensive Intervention (secondary analysis) on ART initiation within 4-months after enrolment in the trial.

Objective 2. Identify individual-, community-, and facility-level factors associated with ART initiation within each intervention arm (Lightest Touch; Staged; and Intensive Interventions).

Objective 3. Determine the cost and scalability of each intervention (Lightest Touch; Staged; and Intensive Interventions).

**Methods:** We will perform an individually randomized control trial with 543 HIV-positive men identified through HIVST and their female partners. Men will be individually randomized 1:1:1 to one of the three intervention arms described above. The study will be performed at 10 health facilities supported by Partners in Hope (PIH). Data collection will include baseline and follow-up surveys and interviews with men and women; medical chart reviews at four-months after study enrollment; qualitative interviews; and a cost analysis of costs associated with each arm. Participants will be enrolled in the study for a total of 4 months with approximately 2 or 3 study visits throughout that period.

**Anticipated results:** We anticipate learning about the most effective strategy to engage men in ART. We also anticipate learning about the type and degree of followup necessary to support men's engagement in ART services. Finally, we anticipate learning about the cost-effectiveness of intervention, with the goal of improving cost-effectiveness for the Ministry of Health. Results from this study could be used to define best practices and to further scale ART-focused programs for men in Malawi.

## TABLE OF CONTENTS

|                                                   |           |
|---------------------------------------------------|-----------|
| <b>1. INTRODUCTION</b> .....                      | <b>4</b>  |
| 1.1. Background .....                             | 4         |
| 1.2. Problem statement .....                      | 4         |
| 1.3. Justification .....                          | 4         |
| <b>2. OBJECTIVES</b> .....                        | <b>4</b>  |
| 2.1. Primary objective.....                       | 4         |
| 2.2. Secondary objectives.....                    | 4         |
| <b>3. LITERATURE REVIEW</b> .....                 | <b>5</b>  |
| <b>4. METHODOLOGY</b> .....                       | <b>8</b>  |
| 4.1. Intervention description .....               | 9         |
| 4.2. Place of study .....                         | 11        |
| 4.3. OBJECTIVE 1.....                             | 12        |
| 4.3.1. Study design.....                          | 12        |
| 4.3.2. Target population .....                    | 12        |
| 4.3.3. Sampling techniques and enrollment.....    | 13        |
| 4.3.4. Study Activities.....                      | 13        |
| 4.3.5. Data collection techniques and tools ..... | 15        |
| 4.3.6. Sample size determination.....             | 17        |
| 4.3.7. Data analysis .....                        | 17        |
| 4.4. OBJECTIVE 2.....                             | 17        |
| 4.4.1. Study design.....                          | 17        |
| 4.4.2. Target population .....                    | 17        |
| 4.4.3. Sampling techniques and tools.....         | 18        |
| 4.4.4. Data collection techniques and tools ..... | 18        |
| 4.4.5. Sample size determination.....             | 19        |
| 4.4.6. Data analysis .....                        | 19        |
| 4.5. OBJECTIVE 3.....                             | 20        |
| 4.5.1. Study design.....                          | 20        |
| 4.5.2. Data collection techniques and tools ..... | 20        |
| 4.5.3. Data analysis.....                         | 20        |
| <b>5. ETHICAL CONSIDERATIONS</b> .....            | <b>21</b> |
| <b>6. DISSMINATION OF RESULTS</b> .....           | <b>22</b> |
| <b>7. PERSONNEL ROLES AND INSTITUTIONS</b> .....  | <b>23</b> |
| <b>8. REGULATORY OVERSIGHT</b> .....              | <b>24</b> |
| <b>9. STUDY IMPLEMENTATION</b> .....              | <b>24</b> |
| <b>10. PROTOCOL DEVIATION REPORTING</b> .....     | <b>25</b> |
| <b>11. WORK PLAN TIMELINE</b> .....               | <b>25</b> |
| <b>12. BUDGET AND JUSTIFICATION</b> .....         | <b>25</b> |
| <b>13. REFERENCES</b> .....                       | <b>27</b> |
| <b>14. APPENDIX</b> .....                         | <b>30</b> |
| 14.1. APPENDIX A – Study Invitation Cards .....   | 30        |

|    |        |                                                                |
|----|--------|----------------------------------------------------------------|
| 1  |        |                                                                |
| 2  |        |                                                                |
| 3  | 14.2.  | <i>APPENDIX B – Recruitment and Screening Script</i> ..... 32  |
| 4  | 14.3.  | <i>APPENDIX C – Written Informed Consent- Female</i> ..... 36  |
| 5  | 14.4.  | <i>APPENDIX D: Written Informed Consent – Male</i> ..... 46    |
| 6  | 14.5.  | <i>APPENDIX E: Baseline Survey – Male</i> ..... 55             |
| 7  | 14.6.  | <i>APPENDIX F: Baseline survey – Female</i> ..... 100          |
| 8  | 14.7.  | <i>APPENDIX G: Follow-up Survey - Male</i> ..... 129           |
| 9  | 14.8.  | <i>APPENDIX H: Follow-up Survey – Female</i> ..... 137         |
| 10 | 14.9.  | <i>APPENDIX I: Data Extraction Tool</i> ..... 144              |
| 11 | 14.10. | <i>APPENDIX J: In-Depth Interview Guide – Female</i> ..... 147 |
| 12 | 14.11. | <i>APPENDIX K: In-Depth Interview Guide – Male</i> ..... 155   |
| 13 | 14.12. | <i>APPENDIX L: Personel CV’s</i> ..... 165                     |
| 14 |        |                                                                |
| 15 |        |                                                                |
| 16 |        |                                                                |
| 17 |        |                                                                |
| 18 |        |                                                                |
| 19 |        |                                                                |
| 20 |        |                                                                |
| 21 |        |                                                                |
| 22 |        |                                                                |
| 23 |        |                                                                |
| 24 |        |                                                                |
| 25 |        |                                                                |
| 26 |        |                                                                |
| 27 |        |                                                                |
| 28 |        |                                                                |
| 29 |        |                                                                |
| 30 |        |                                                                |
| 31 |        |                                                                |
| 32 |        |                                                                |
| 33 |        |                                                                |
| 34 |        |                                                                |
| 35 |        |                                                                |
| 36 |        |                                                                |
| 37 |        |                                                                |
| 38 |        |                                                                |
| 39 |        |                                                                |
| 40 |        |                                                                |
| 41 |        |                                                                |
| 42 |        |                                                                |
| 43 |        |                                                                |
| 44 |        |                                                                |
| 45 |        |                                                                |
| 46 |        |                                                                |
| 47 |        |                                                                |
| 48 |        |                                                                |
| 49 |        |                                                                |
| 50 |        |                                                                |
| 51 |        |                                                                |
| 52 |        |                                                                |
| 53 |        |                                                                |
| 54 |        |                                                                |
| 55 |        |                                                                |
| 56 |        |                                                                |
| 57 |        |                                                                |
| 58 |        |                                                                |
| 59 |        |                                                                |
| 60 |        |                                                                |

## 1. INTRODUCTION

### 1.1. Background

HIV self-testing (HIVST) is an effective strategy to improve HIV testing coverage, especially among hard-to-reach populations such as men and youth. Index testing, whereby a HIV positive client gives an HIVST kit to their sexual partner to use at home, is considered beneficial for its ability to maintain a testers privacy. The method is now recommended by the World Health Organization (WHO) and is being adopted as policy throughout sub-Saharan Africa (SSA). However, uptake of antiretroviral therapy (ART) and adherence after utilizing HIVST remains sub-optimal among certain population, specifically men. Innovative ART initiation and early retention strategies are urgently needed for Index HIVST to be successful.

### 1.2. Problem statement

We must better understand how to engage men in HIV care. Specifically, there is limited literature on feasible differentiated models to support men to start and stay on treatment that can be taken to scale. Further, there is increased recognition that individuals are at greatest risk of loss-to-follow-up during transition periods across the cascade (i.e. when starting ART). ART initiation and early retention must be improved if HIVST is to become a viable option for high-risk groups in SSA. To address this gap, we propose to conduct a study to test and evaluate varying strategies for ART initiation and retention amongst men.

### 1.3. Justification

This study will combine HIVST with a second-level intervention focused on ART initiation to address the urgent gap in ART initiation and early retention among HIVST users. Additionally, Objective 3 will allow us to develop the lowest cost intervention package while reaching the highest number of male partners.

## 2. OBJECTIVES

### 2.1. Primary objective

*Objective 1.* Test the impact of a staged ART intervention vs simple reminders and the effectiveness of a staged ART intervention vs home-based ART on ART initiation within 3-months of an HIV-positive diagnosis

### 2.2. Secondary objectives

*Objective 2.* Identify individual-, community-, and facility-level factors associated with ART initiation within each intervention.

*Objective 3.* Determine the cost and scalability of each intervention.

### 3. LITERATURE REVIEW

#### Background

Men in sub-Saharan Africa are less likely than women to use HIV services.<sup>1</sup> Men's absence from care is concerning not only for their own health, but also for the health of girls and young women who continue to be infected at unacceptably high rates.<sup>2</sup> HIV prevention and treatment programs have not traditionally been directed at men. Men are notably absent from international guidelines, national policies, and local HIV interventions. Research shows that women are 322% more likely to be mentioned in international HIV guidelines than men.<sup>3</sup> In the context of Malawi, national guidelines expect women of reproductive age to attend a health facility 5-17 times per year (equivalent to 19-63 hours)<sup>4</sup>, and 180-472 times in their reproductive lifespan (15-44 years). There are no such expectations for men (see Table 1). The justification for the global attention of HIV program thus far on women and girls is without dispute. Gender inequality is a key driver which impacts women's health and access to HIV services and creates specific vulnerabilities for women to HIV infection.<sup>5</sup> However, framing HIV as a woman's concern means we have failed to understand how gender affects and drives the burden of ill health for men, and inadvertently perpetuates the epidemic for young women and girls. Targeted strategies specific to men are urgently needed if we are to engage them in care.

**Table 1: Malawi ministry of health recommended health services and estimated visits required across the reproductive life span (15-44 years)**

| Service         | Frequency | Target Population | Estimated number of visits between 15-44 years |                                         |                                |           |
|-----------------|-----------|-------------------|------------------------------------------------|-----------------------------------------|--------------------------------|-----------|
|                 |           |                   | Women: 5-year FP (Implant; 9%*)                | Women: quarterly FG (injectables; 23%*) | Women: monthly FP (pills, 2%*) | Men       |
| ANC             | 17.6      | Women             | 18                                             | 18                                      | 18                             | -         |
| Delivery        | 4.4       | Women             | 4                                              | 4                                       | 4                              | -         |
| Post-natal      | 4.4       | Women             | 4                                              | 4                                       | 4                              | -         |
| Family Planning | 88        | Women             | 7                                              | 88                                      | 264                            | -         |
| Under five      | 120       | Women             | 120                                            | 120                                     | 120                            | -         |
| HIV testing     | 22.6      | Women and men     | 23                                             | 23                                      | 23                             | 29        |
| Circumcision    | 3         | Men               | -                                              | -                                       | -                              | 3         |
| <b>Total</b>    |           |                   | <b>176</b>                                     | <b>257</b>                              | <b>433</b>                     | <b>32</b> |

Male partners of women who are already identified as HIV-positive (index partners) are still a major concern for epidemic control due to high rates of multiple and concurrent partnerships among men<sup>6</sup> and the fact that index male partners have two times the risk of being HIV-positive as compared to the general male population.<sup>7</sup> Data from a recent HIVST study show that there is a high need for index testing among men in Malawi: across 3 high-burden district hospitals in Malawi, men represented 73% of all index partners in need of testing. Among those who did test, male partners were 4 times more likely to test HIV-positive than female partners (23% versus 3%), representing urgent unmet need among men.<sup>8</sup>

A recent Index HIV Trial in Malawi found that HIV testing among men increased dramatically when HIV-positive clients give HIVST kits to their sexual partners to use at home.<sup>9</sup> The study found that 66% of male partners in the HIVST arm tested for HIV compared to only 22% of men in the standard partner referral slip arm. Within the HIVST arm, men who tested for HIV had an HIV-positivity rate of 23%, with no adverse events reported (see Fig 1).<sup>2</sup> Index HIVST is highly acceptable and allows men to test at times and locations convenient for them, with complete privacy in their own homes.<sup>10,11</sup>

However, innovative ART initiation and early retention strategies are urgently needed for Index HIVST

to be successful. The aforementioned study showed that ART initiation was unacceptably low, with only 22% of HIV-positive men in the HIVST arm initiating ART at 6-months versus 75% of men in standard partner referral slip arm).<sup>3</sup> (See Figure 1). Poor rates of ART initiation are commonly reported across most HIVST studies, with ART initiation rates ~20-45%<sup>7,12-14</sup>, although ART initiation is notoriously difficult to measure within HIVST strategies. A cost analysis for national scale-up of Index HIVST in Malawi showed that 76% of men tested must initiate ART for Index HIVST to be cost-neutral at the national level as compared to using partner referral slips.

**Figure 1:** Male partner use of HIV services Index HIVST vs. referral slips (n=285) from HIVST trial (PI: Dovel)

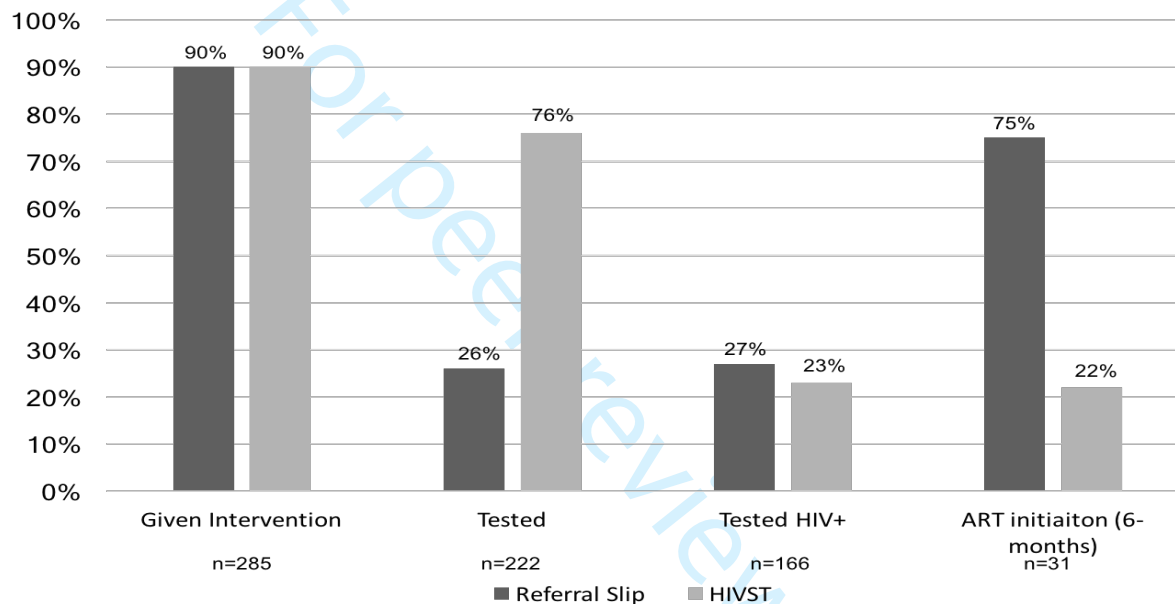

Two overarching barriers keep HIV-positive men from accessing ART services: (1) lack of male-friendly services,<sup>15-17</sup> and (2) harmful gender norms.<sup>18-20</sup> Male friendly services are private and convenient (requiring minimal time), and offered by health workers who understand the unique needs of men.<sup>21</sup> In addition, men are often unfamiliar with the health system, and are unsure how to navigate facility-based services. Gender norms that prioritize men as strong and self-reliant perpetuate fear of unwanted disclosure and stigma, and discourage men's engagement in ART.<sup>18,21</sup> Our research in Malawi found similar barriers to ART initiation for men who tested HIV-positive: men avoided ART services due to (1) fear of unwanted disclosure and stigma due to lack of privacy; (2) time/cost required to access care; (3) poor knowledge about the benefits of early ART initiation; and (4) beliefs that require men be strong, in control, and focused on short-term benefits such as daily financial earnings and respect from their male friends. Index HIVST must be combined with innovative ART interventions that address these barriers.

### **Evidence based for interventions that increase ART initiation**

We have conducted a thorough search of the literature and have identified several intervention strategies that may increase ART initiation among men who use HIVST: (1) reminders + peer navigation; (2) motivational interviewing; and (3) home-based ART.

*Reminders + Peer Navigation* is shown to help clients overcome fears about facility-based services and



1  
2  
3 provide peer modeling how to live successfully with HIV.<sup>22</sup> While the strategy has been primarily tested  
4 within traditional HIV testing strategies, we hypothesize that the same mechanisms will work for men  
5 who test through Index HIVST. Reminders are usually done over the phone via phone calls or SMS and  
6 can vary in frequency based on the health care workers disgression. Peer Navigation is assisted guidance  
7 to the health clinic as well as overviews of where to go/what to do when at the facility once there to  
8 ensure men feel more comfortable in the clinic environment.  
9

10 *Motivational Interviewing* is becoming widely recognized as a key strategy to help clients navigate  
11 barriers to the desired outcome by building client's self-efficacy, identifying internal motivation for the  
12 desired behavior, and establishing strategies and short- and long-term goals needed to reach a desired  
13 outcome.<sup>8,23</sup> Motivational interviewing is seen as particularly effective when clients need to make difficult  
14 decisions and overcome multi-level barriers to behavior change.<sup>24,25</sup> The strategy has been used to  
15 improve ART adherence<sup>8,25</sup> and reduce sexual risk behavior.<sup>15</sup>  
16

17 In contrast, traditional counselling efforts are largely informational and directive, whereby health care  
18 workers deliver a pre-determined counseling package that is not responsive to a client's individual  
19 situation.<sup>16,17</sup> Such methods have been proven largely ineffective,<sup>18</sup> particularly with hard-to-reach  
20 populations such as men.<sup>19</sup> Motivational interviewing differs from traditional strategies by adopting a  
21 client-centered approach is based on collaboration, evocation and respect for autonomy. We hypothesize  
22 that these counseling techniques will encourage HIV status acceptance and disclosure, promote health  
23 seeking behavior, provide coping strategies men need to overcome barriers related to facility-based care,  
24 and ultimately, facilitate ART initiation.  
25

26 Furthermore, motivational interviewing and client-centered care should resonate with and address the  
27 needs of men. Partners in Hope Malawi conducted 25 interviews with men and 6 focus group discussions  
28 with health care workers and female partners (n=42) to assess what health services men desired.  
29 Overwhelmingly, men reported wanting increased counseling on sexual health (including HIV) and  
30 marital concerns. Exit surveys with male ART clients (n=180) show that only 38% of men were aware of  
31 Treatment as Prevention and 65% aware of the benefits of early ART initiation, highlighting major  
32 knowledge gaps that may influence engagement in care. Motivational interviewing and client-centered  
33 counseling will be able to address both gaps in ART treatment and sexual health knowledge.  
34

35 *Home-based ART initiation* has improved ART initiation across the region. A systematic review found  
36 that home-based ART is associated with ART retention, decreased mortality,<sup>26</sup> and in some cases, reduced  
37 stigma and increased privacy.<sup>27,28</sup> We conducted one of the only studies to examine home-based ART  
38 initiation within a community HIVST distribution strategy (Co-I: Choko). We found that home-based  
39 ART initiation alongside home-based HIVST significantly increased ART initiation as compared to  
40 standard facility-based initiation (RR 2.94; p-value<0.001).<sup>13</sup>  
41

42 Home-based ART may be particularly attractive to hard-to-reach men because it reduces client time  
43 required to access services and provides an easy, opt-out entry point for men who otherwise may have  
44 never engaged with the health care system, or know how to navigate complicated, busy health facilities.  
45 Home-based ART has been associated with a three-fold reduction in financial costs to clients.<sup>29</sup> Further,  
46 home-based ART facilitates client-centered, one-on-one care that is often not feasible in busy clinic  
47 settings.  
48

49 The Malawi Ministry of Health is in the process of rolling out community-based ART distribution  
50 strategies, and may consider home-based ART initiation for hard-to-reach populations. However, home-  
51 based ART is considered a resource intensive strategy, and therefore should (1) only be offered to the  
52 hardest-to-reach populations, and (2) requires that clients who initiate ART at home-based eventually link  
53 into facility-based care. Additionally, findings from a recent Index HIVST Trial show that home-based  
54 services for men is acceptable to female ART clients in the Malawian context, with minimal risk of  
55 adverse events. Over 90% of female ART clients had disclosed their HIV-status to their partner and were  
56 willing to have their male partners traced in their homes for additional services.  
57  
58  
59  
60



Finally, increased privacy and decreased wait-times are essential if men are to engage in HIV services. As part of a study on new Universal Treatment policies in Malawi, 15 in-depth interviews and 208 surveys were conducted with newly diagnosed HIV-positive men. Fear of unwanted disclosure due to limited privacy and a lack of trust in the health facility were the primary barriers to men's ART initiation. Home-based ART initiation can help address these barriers for ART initiation, and motivational interviewing can help provide men the skills needed to navigate these barriers within the health system in order to promote ART retention. Further, the vast majority (>95%) of men who used HIVST in the Index HIVST trial disclosed their HIV status to their female partner<sup>8</sup>, meaning that home visits (i.e., reminders, peer navigation, motivational interviewing, or home-based ART) will not increase risk of unwanted disclosure to one's sexual partner. Table 2 below outlines how the proposed interventions will address barriers to ART initiation identified in the literature.

**Table 2.** Levels and specific barriers to men's ART initiation, and intervention components

| Barriers to ART Initiation                                 | Intervention Components       | Level of Intervention |
|------------------------------------------------------------|-------------------------------|-----------------------|
| Unfamiliar with health system                              | Reminders and Peer Navigation | Health System         |
| Belief about gender norms and focus on short-term benefits | Motivational Interviewing     | Community/Individual  |
| Poor knowledge                                             |                               |                       |
| Time/cost requirements                                     | Home-Based ART Initiation     | Health System         |
| Lack of privacy/fear of disclosure                         |                               |                       |
| Unfamiliar with health system                              |                               |                       |

#### 4. METHODOLOGY

This study will be an individually randomized trial comparing three different strategies to improve ART initiation and early retention among men who test HIV-positive with HIVST. Study staff will utilize the Ministry of Health Index Testing Register and trace HIV positive women and their male partners to be screened and enrolled if they meet the inclusion criteria. Enrolled men will be randomized to one of three arms and will receive follow up and varying degrees of support based on the arm assigned. Outcomes will be assessed after 90 days after enrollment. Survey data, qualitative data, medical chart data (Objectives 1 and 2) and costing data (Objective 3) will be collected over years 1-3. A study flow chart is illustrated below (Figure 2).

Figure 2: Study flow chart



4.1. Intervention description

Each arm will offer an intervention immediately after study enrollment (that same day; day 0). Follow-up interventions will be offered every 14 days after that until 76 days or ART initiation is reached, whichever comes first.

Description of study arms:

**Arm 1: “Lightest Touch” Intervention**, whereby facility staff provide reminders and peer navigation (SMS and home visits) for men to encourage enrolment in facility-based ART programs. One reminder on the day of enrollment and every 14 days thereafter, until 76 days or ART initiation, whichever comes first. If initiation is not reached at 90 days, the patient will be classified as not initiated for study purposes. See Arm 1 diagram below:



Fig 2. Timing of interventions to be offered in Aim 1

Legend:

● Approximate time the intervention will be offered (approximately every 2 weeks until 76 days, or until ART initiation, whichever comes first)

**Arm 2: “Staged” Intervention**, whereby the intervention will build in intensity each month for those

who have not initiated ART in the previous month, or for a maximum of 3 months, whichever comes first. The following intervention components that will be added each month (incrementally) until the first ART distribution is completed:

- Day 0-29: Reminders and, for those who agree to initiate, peer navigation;
- Day 30-59: Motivational interviewing and, for those who agree to initiate, peer navigation;
- Day 60-79: Motivational interviewing + home-based ART initiation and, for those who initiate, reminders and peer navigation for the facility-based 4-week ART refill appointment).

See Arm 2 diagram below:



Fig 3. Timing of interventions to be offered in Aim 2

**Legend:**

- Approximate time the intervention will be offered (approximately every 2 weeks until 76 days, or until ART initiation, whichever comes first)

**Arm 3: “Intensive” Intervention**, whereby the most resource intensive intervention is offered immediately to all HIV-positive male partners. See Fig 4 for timeline. Components include:

- Motivational interviewing
- Home-based ART initiation
- 4-weeks after ART initiation: Reminders and peer navigation to facility for 4-week ART refill appointment

Home-based ART initiation will be scheduled at times convenient for men, including evening and weekend hours. Men who prefer to initiate in another private location in the community (besides their home) will be able to do so. The first home-visit will be conducted by a trained nurse and will include confirmatory HIV testing using Ministry of Health standard algorithm (Determine + Unigold), pre-ART counseling and motivational interviewing, a basic health evaluation, and ART initiation with a 30-day supply of first-line ART in Malawi – dolutegravir, tenofovir, and lamivudine as a single tablet. Clients will also be given a 30-day supply of cotrimoxazole, which is standard of care for all HIV-positive individuals.

Prior to ART initiation, a basic health evaluation will be performed by the nurse, including screening for tuberculosis with routine questions.<sup>66</sup> Any individual identified by the study nurse with concerns for an active opportunistic infection or other health problem(s) that could complicate home-based ART will be immediately referred and escorted to the facility.

At the same visit, motivational interviewing will be performed in preparation for men to engage in facility-based ART services. This includes counseling on the benefits of early ART, strategies for disclosure and positive living, strategies to overcome facility-based barriers to ART services, and addressing harmful gender norms that may discourage men from using care. Counseling will be adaptive to the needs and concerns of male clients. At 4-weeks after ART initiation, an expert client will escort the

man to a nearby facility of his choice to join the facility-based ART cohort. Peer navigation will be provided to ensure men become familiar with the facility-based program. Men who wish to attend a facility that is not nearby will be linked with a male counselor from the selected facility. After completing all facility-based ART services for that day, the male partner will receive additional client-centered counseling with the same counselor to discuss the experience, benefits and challenges associated with facility-based ART, and strategies to overcome barriers. See Arm 3 diagram below:



Fig 4. Timing of interventions to be offered in Aim 3

Legend:

● Approximate time the intervention will be offered (approximately every 2 weeks until 76 days, or until ART initiation, whichever comes first)

4.2. Place of study

All study activities will take place in 10 Partners in Hope supported facilities within the Lilongwe and Chikwawa districts, representing 19,198 adult female ART clients across all sites. These districts were chosen because they are priority districts for the Presidents Emergency Plan for AIDS Relief (PEPFAR) and have the highest HIV prevalence and unmet need of all Partners in Hope supported districts. See Table 3 for the selected 10 health facilities.

Table 3: Selected study sites

| District   | Facility name                 | ART Cohort Size |
|------------|-------------------------------|-----------------|
| Chickwawa  | St. Monftord Mission Hospital | 3533            |
| Chickwawa  | Kalemba Community Hospital    | 2087            |
| Chikwawa   | Chickwawa District Hospital   | 4898            |
| Kasungu    | Kasungu District Hospital     | 5942            |
| Lilongwe   | Nkhoma Community Hospital     | 2166            |
| Lilongwe   | Mponela Rural Hospital        | 1099            |
| Lilongwe   | Daeyang Luke Hospital         | 1594            |
| Nkhotakota | Nkhotakota District Hospital  | 5361            |

|        |                          |      |
|--------|--------------------------|------|
| Nsanje | Nsanje District Hospital | 3904 |
| Nsanje | Ngabu Rural Hospital     | 1237 |

Specific methodology for each Objective is described below:

### 4.3. OBJECTIVE 1

**Evaluate the effectiveness of the Staged ART Intervention vs Lightest Touch Intervention (primary analysis) and the effectiveness of the Staged ART Intervention vs Intensive Intervention (secondary analysis) on ART initiation within 4-months after enrolment in the trial.**

- **Hypothesis 1.1:** 25% of men will initiate ART with simple reminders compared to 45% with motivational interviewing
- **Hypothesis 1.2:** 65% of men will initiate ART with home-based ART initiation compared to 45% with motivational interviewing

#### 4.3.1. Study design

We will conduct an individually randomized controlled trial at 10 high-burden facilities in Malawi.

#### 4.3.2. Target population

We will enroll 543 HIV-positive men identified through routine Index HIVST strategies and their female partners (1,086 participants total). While men are the primary focus of the study, female partners will be enrolled in order to understand their perception of their male partners use of ART services, acceptability of the intervention, and any unintended outcomes or adverse events.

##### *Eligibility Criteria*

Female ART clients will be enrolled in order to conduct baseline and follow-up surveys to understand their perception of their male partners use of ART services, acceptability of the intervention, and any unintended outcomes or adverse events.

##### *Female Partner*

- Inclusion criteria include: (1) client and partner are  $\geq 15$  years of age; (2) partner lives in facility catchment area; (3) partner tested HIV-positive and has not initiated ART; and (4) ART client reports no interpersonal violence (IPV) as defined by WHO with their current sexual partner in the past 12 months.
- Exclusion criteria include: (1) client and partner are  $< 15$  years of age; (2) partner does not live in facility catchment area; (3) partner has not tested HIV-positive or has testing positive and has initiated ART; and (4) ART client has reported interpersonal violence (IPV) as defined by WHO with their current sexual partner in the past 12 months.

Men will be enrolled as the primary recipient of the intervention.

##### *Male partner*

- Inclusion criteria include: (1) self and partner  $\geq 15$  years of age; (2) live in the facility catchment area (i.e., in the past 30 days, has spent  $\geq 50\%$  of all nights in the village); (3) has tested HIV-positive and has not initiated ART;

- Exclusion criteria include: (1) self and partner <15 years of age; (2) does not live in the facility catchment area (i.e., in the past 30 days, has spent <50% of all nights in the village); (3) has not tested HIV-positive or has tested HIV-positive and has initiated ART

**4.3.3. Sampling techniques and enrollment**

Sampling, screening, and enrolling male partners will be embedded within routine Index HIVST strategies.

*Brief description of Routine MOH HIVST Guidelines*

Briefly, routine Index HIVST includes three steps:

- *Identify ART clients with sexual partners in need of Index HIVST:* as outlined in the Malawi guidelines within the health care facility.
- *Distribute Index HIVST:* ART clients with a partner of unknown status will receive standard Index HIVST kit. They will be provided a demonstration, counseling, and an overview of risks and benefits.
- *Follow-Up on Index HIVST Use:* During their next ART appointments, ART clients are asked about HIVST distribution, use, and result of the HIVST kit, along with male partner linkage to a health facility for those who tested HIV-positive (i.e., confirmatory HIV testing and ART initiation). Data are documented in the Index HIVST register.

Once routine Index HIVST activities are completed, study recruitment and enrollment will commence. See Figure 3 for a complete description of participant enrollment and study activities.

**Figure 3: Study screening and enrollment procedures flow chart**

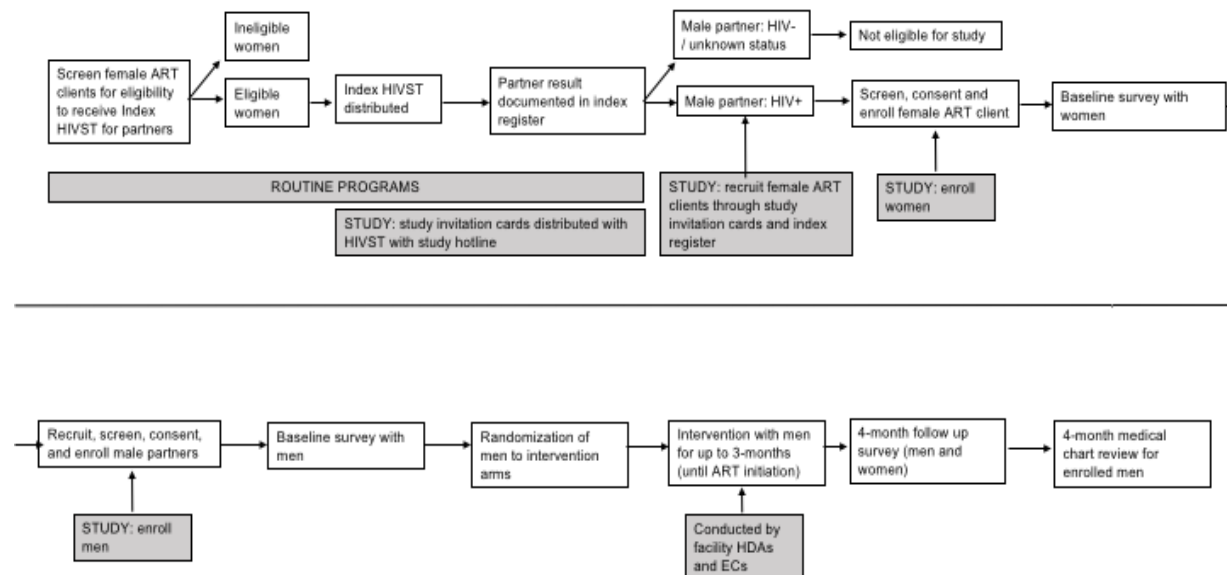

**4.3.4. Study Activities**

*Female ART client recruitment*



1  
2  
3 To maximize the number of male partners available for enrollment, the study team will introduce study  
4 invitation cards as part of Index HIVST activities and include them with HIVST kits distributed as a part  
5 of routine Index HIVST procedures (described above). Study invitation cards will include a 'hotline'  
6 phone number and will not provide any HIV specific information to ensure confidentiality. (see Appendix  
7 A for study invitation card). Female partners will be informed that should their male partner be found  
8 HIV-positive, they and their partner may be eligible for a study and should call the hotline number of the  
9 invitation card to receive more information.  
10

11 In addition, the study team will review the Index Testing Register on a regular basis to identify female  
12 ART clients who reported HIV-positive male partners through routine Index HIVST procedures. Female  
13 ART clients identified will be contact by routine facility staff to be informed about the study and refered  
14 to study staff if interested in enrollment.  
15

#### 16 *Female ART client enrollment*

17  
18 Female partners interested in the study will provide oral consent to participate in study screening and be  
19 screened for eligibility for the study (Appendix B). Study staff will conduct all consent and screening  
20 activities. If eligible and willing to participant, written informed consent will be obtained (Appendix C).  
21 Female partners will be enrolled even if their male partner (1) does not consent to study participation (2)  
22 cannot be traced.  
23

24 Upon enrollment in the study, female ART clients will work with study staff to make a plan for inviting  
25 male partners to enroll in the study. Baseline surveys with female ART clients will be conducted that  
26 same day or on a day convenient for the female ART client. Women whose partners agree to participate  
27 in the study will be followed up after 4-months for a follow up survey regardless of the outcome of their  
28 partner (ie loss-to-follow-up).  
29

#### 30 *Male partner recruitment*

31  
32 Once female ART clients are enrolled, male partners will be recruited, screened, and consented. Study  
33 staff will work with the female ART client to establish a recruitment plan that is acceptable and feasible  
34 for the women. This may include women referring male partners to the study staff, study staff actively  
35 recruiting male partners based on information provided by the female client, or a joint approach where the  
36 study staff approaches male partners with the female ART client. Each female ART client enrolled in the  
37 study will be allowed to choose the recruitment strategy that best fits her individual situation and the  
38 needs of her partner.  
39  
40

#### 41 *Male partner enrollment*

42  
43 Men found eligible and willing to participate, will provide written informed consent (Appendix D) and  
44 will be randomized to one of the three study arms. Randomization will occur using an electronic  
45 randomization system on tablet devices. A baseline survey will be concuted immediately following  
46 consent and the intervention will be carried out over the course of 3 months. Men will be contacted by the  
47 study staff 4-months after enrollment for a follow-up survey.  
48  
49

#### 50 *Randomization*

51  
52 Randomization will be conducted after completion of the baseline survey with male participants. Study  
53 staff will show randomization results as a picture on a pre-programmed tablet, allowing the participant to  
54 view the results themselves in order to maximize transparency and study buy-in. Male participants will be  
55 randomized to 1 of three arms and will be randomized 1:1:1.  
56  
57  
58  
59

### *Intervention*

Interventions will be offered immediately after study enrollment (that same day or the closest day that is convenient for the male participant). Follow-up interventions will be offered every 14 days after enrollment until 76 days after enrollment in the study or ART initiation is reached, whichever comes first. See a full description of the intervention in the Intervention Description section (4.1).

Intervention arms include:

1. ***Lightest touch arm:*** reminders and peer navigation to facility-based ART services
2. ***Staged arm:*** intervention builds in intensity each month for those who have not initiated ART in the previous month. Strategies include reminders and peer navigation, motivational interviewing, and home-based ART initiation
3. ***Intensive arm:*** home-based ART initiation + motivational interviewing + peer navigation to facility-based ART services for their 4-week follow-up appointment

Male expert clients and male nurses will complete all intervention activities to ensure it is as close to real-world implementation as possible (not implemented by Research Assistants). Research Assistants will support facility staff to ensure men are given the appropriate intervention (based on randomization arm), and that all staff activities related to the intervention are documented (i.e., how many reminders were given to each client, ect.). Intervention monitoring and evaluation tools will be developed and incorporated into the facility staff daily routine. Weekly reviews of all intervention monitoring tools and planning for the following week will be completed with study expert clients, nurses, and Research Assistant to ensure adherence to the study protocol. The Study coordinators and PI's will be highly involved throughout the implementation process to ensure protocol adherence.

#### ***4.3.5. Data collection techniques and tools***

Data collection tools will include:

- ***Baseline Survey:*** Research assistants will administer baseline surveys with both female ART clients and male partners immediately following enrollment (before randomization). Surveys will collect data on male and female demographics, sexual partnerships and couple dynamics, and men's history with health services, and HIV services specifically. (Appendix E & F)
- ***Follow-up Survey:*** Research assistants will administer follow-up surveys with female ART clients and male participants 4-months after enrolment in the study. Follow-up surveys with men will assess the primary outcome of interest (ART initiation and completion of 4-week follow-up appointment), acceptability of the intervention, and any adverse events (ie., unwanted status disclosure). Men who cannot be reached will be counted as failures for true ART initiation. Follow-up surveys with female ART clients will assess acceptability of the intervention and any adverse events (i.e., IPV, end of the relationship, or unwanted disclosure) associated with intervention procedures. (Appendix G & H)
- ***Medical Chart Reviews:*** Identifiers will be collected for all men enrolled in the study, including name, age, village and address, and phone number. Identifiers will be used to conduct medical chart reviews at 4-months after enrollment as another measure of ART initiation (attendance to the 4-week follow-up ART appointment). Facility staff (established data clerks employed by Partners in Hope) will review medical records at study facilities and all other Partners in Hope



supported facilities within participating districts (61 facilities in total) to account for men who engage in ART outside study facilities. We successfully used this method in other HIVST studies to capture ART initiation.<sup>3</sup> Male partners who are not found in medical chart reviews will receive a follow-up home-visit to confirm ART outcomes through review of their individual medical record book (health passport) and self-reporting in the event that there are gaps in the record. Men who cannot be reached will be counted as failures for true ART initiation. (Appendix I)

- *Process Implementation Data:* Expert clients, nurses, and research assistants will keep daily logs as part of study monitoring and evaluation tools in order to assess the implementation of the intervention for each participant. Primary events to be recorded in the daily logs are: (1) unable to reach participant (and reason); (2) contacted participant; (3) intervention provided (and notes about the challenges and successes of the interaction; and (4) other comments relevant to intervention implementation. Each event will be recorded with a corresponding date.

Primary and secondary outcomes are measured through medical chart reviews and follow-up surveys (see Table 4).

**Table 4: Study Measures for Objective 1**

| Outcome                                                                                                                   | Measurement                                                                                                                  | Source                           |
|---------------------------------------------------------------------------------------------------------------------------|------------------------------------------------------------------------------------------------------------------------------|----------------------------------|
| <b>Primary Outcomes</b>                                                                                                   |                                                                                                                              |                                  |
| Early ART Retention                                                                                                       | Proportion of men who initiate ART at 3-months and attended their 4-week ART refill appointment at 4-months after enrollment | Medical chart review at 4-months |
| <b>Secondary Outcomes</b>                                                                                                 |                                                                                                                              |                                  |
| ART initiation                                                                                                            | Proportion of men who initiate ART at 3-months after enrollment                                                              | Medical chart review at 3-months |
| Adverse events by female ART client (IPV, unwanted disclosure, end of relationship) or male partner (unwanted disclosure) | Self-report from female ART client and their male partners who were identified as HIV-positive                               | Follow-up surveys at 4-months    |
| <b>Process Outcomes</b>                                                                                                   |                                                                                                                              |                                  |
| Proportion of female ART clients who consent                                                                              | Proportion of eligible ART clients who consent to the participate in the study                                               | Process implementation data      |
| Proportion of men traced                                                                                                  | Proportion of men who were successfully traced within 3-months after female ART client is enrolled                           | Process implementation data      |
| Proportion of men who consented                                                                                           | Proportion of eligible men who consent to participate in the study                                                           | Process implementation data      |

- *Sensitivity analyses for men excluded from the trial:* We recognize that men's consent to participate in the study may bias the sample enrolled in the study. There are two groups that we may not be able to include in the main study: (1) men we are unable to trace/contact (herein referred to as "unreachable men") and (2) men we are able to reach but who refuse to participate in the main trial (herein referred to as "male refusers"). We will take two approaches to address this potential bias
  - Unreachable Men: We will collect data on men who are unreachable via their female partner. Female partners for these men will complete a brief survey regarding Surveys will collect data on male and female demographics, sexual partnerships and couple dynamics, and men's history with health services, and HIV services specifically (as reported by female partners). We successfully used similar methods in the Index HIVST Trial.
  - Male Refusers: Men who are contacted but do not consent to the trial will be consented for a one-time survey immediately following refusal for the larger study. The same data will be collected, as described above.

#### 4.3.6. *Sample size determination*

We powered the study to detect differences in ART initiation between Lightest Touch and Staged Interventions at 4-months after enrollment (primary outcome). We also assured we were powered to detect differences in ART initiation between Staged Interventions and the Intensive Intervention. We Assume that 25% of men in the Lightest Touch arm, 55% in the Staged Intervention arm, and 75% in the Resource Intensive arm initiate ART at 3-months and attend their 4-week follow-up appointment at 4-months. Any man lost to follow-up in any arm will be treated as failures for the outcome evaluation. The sample size needed to detect this difference with the power of 0.8 is 181 men per arm. The calculation is based on asymptotic normality of log odds ratio. We need to enroll and randomize a total of 543 HIV-positive men. Assuming that 25% of women have partners of unknown status, 65% of male partners will use the HIVST kit, 25% of them will be HIV-positive, and 80% of them will enroll in the study, we will need to screen over 3,000 women who were given index HIVST to reach the required sample size.

#### 4.3.7. *Data analysis*

All randomized men will be included in the analysis of primary outcomes; men with missing outcome assessment due to loss to follow-up will be treated as outcome failures. All primary outcomes are binary; they will be analyzed by logistic regression models with intervention as a predictor, adjusted for baseline socioeconomic and demographic variables. We will conduct sensitivity analyses to account for men who we were never able to contact (unreachable men) and men who refused to participate in the full trial (refusers). We will run several analyses whereby the denominator includes (1) unreachable men and refusers; and (2) refusers.

### 4.4. OBJECTIVE 2

#### **Identify individual-, community-, and facility-level factors associated with ART initiation within each intervention arm (Lightest Touch; Staged; and Intensive Interventions).**

- **Hypothesis 2.1:** In quantitative data, older men, men without strong social support networks, men with high levels of internalized and perceived HIV-related stigma, and men who hold rigid beliefs of gender norms and men's role as the provider and decision maker of the home will be less likely to initiate ART.
- **Hypothesis 2.2:** In qualitative data, primary factors influencing men's decision to start ART will be perceptions of feeling healthy, perceptions of one's ability to continue working and providing for their family without ART initiation, and perceptions of HIV-related stigma within one's community.

#### 4.4.1. *Study design*

We will use baseline survey data from the randomized trial (Objective 1) to identify factors associated with ART initiation among men. We will also conduct 200 semi-structured in-depth qualitative interviews with a random sub-set of enrolled men (n=100) and their female partners (n=100) to assess in-depth characteristics of men who fail to engage in care, contextualize decisions around ART initiation and retention, and understand additional strategies that may be needed for male partners to successfully initiate and be retained in ART programs.

#### 4.4.2. *Target population*

All men and women enrolled in the overarching trial will complete a baseline survey. Eligibility criteria for study enrollment is described in detail under Objective 1.

A subset of men and women enrolled in the overarching trial will be randomly selected to complete an in-depth interview. Eligibility criteria for in-depth interview are as follows:

### Male partners

- Inclusion criteria include: (1) randomly selected using electronic random selection techniques; (2) linked to care within 4-months after enrolling in the study (defined as completing the 4-week ART refill appointment) (n=50 respondents); or (3) did not link to care within 4 months (n=50 respondents)
- Exclusion criteria include: (1) not randomly selected using electronic random selection techniques

### Female partners

- Inclusion criteria include: (1) randomly selected using electronic random selection techniques; (2) partners could never be traced for study enrollment; or (3) partners were enrolled but were lost to follow up and unable to be reached again
- Exclusion criteria include: (1) not randomly selected using electronic random selection techniques; (2) partners could be traced for study enrollment; or (3) partners were enrolled and were not lost to follow up and were able to be reached again

#### 4.4.3. Sampling techniques and tools

Survey data will include all men and women enrolled in the study (n=1,086; described in detail in Objective 1). 100 men (~ 33 per study arm) and 100 women (~ 33 per study arm) enrolled in the study will be randomly be selected for in-depth interviews.

#### 4.4.4. Data collection techniques and tools

**Surveys:** Baseline and 4-month follow-up surveys will be conducted with men and women enrolled in the trial. They will focus on:

- *Health care system:* perceptions regarding the following aspects of ART services (i) privacy and confidentiality; (ii) availability of services; (iii) wait-time and distance to facility; (iv) quality of care and rude behavior from health care providers, using validated measures.
- *Sociodemographics:* (i) age; (ii) household assets; (iii) work; and (iv) substance use
- *Couple characteristics:* (i) relationship type and length; (ii) sexual activity and risk; (iii) frequency of communication; (iv) disclosure; (v) joint decision making using standard measures from Demographic Health Survey (DHS);<sup>17</sup> (vi) gender norms using validated Gender Equitable Men (GEM) Scale,<sup>67</sup> and (v) Revised Conflict Tactics Scale.<sup>68</sup>
- *Knowledge/perceptions and biomedical factors:* (i) knowledge about HIV and ART (treatment as prevention, benefits of early ART); (ii) risk perception (morbidity and mortality); standard DHS measures on (iii) previous use of HIV services and (iv) self-rated health;<sup>17</sup> and (v) WHO staging at enrollment.

**In-depth interviews:** Table 5 below describes in-depth interview participants and justification. In-depth interview guides for men and women are developed based on existing literature and our extensive experience conducting in-depth interviews with this population (Appendix J and K). Female partners will provide important insight into the circumstances of these men, and potential strategies to more effectively reach them. Men's qualitative feedback is particularly important for the staged intervention and intensive intervention since these are fairly novel and under explored.

**Table 5.** Description of in-depth interview participants and justification

| Participant type                                                                         | Number of interviews | Justification                                                                                                                                           |
|------------------------------------------------------------------------------------------|----------------------|---------------------------------------------------------------------------------------------------------------------------------------------------------|
| Women whose male partners were <b>unreachable</b> during the study enrollment            | 50 (~ 16 per arm)    | To understand the couple dynamics and characteristics of men who were never traced and additional strategies to reaching these men                      |
| Women whose male partners were <b>loss-to-follow-up after</b> study enrollment           | 50 (~ 16 per arm)    | To understand the couple dynamics and characteristics of men who were loss-to-follow-up, and additional strategies to better engage these men in care   |
| Male participants who <b>did not</b> complete 4-week ART refill appointments by 4-months | 50 (~ 16 per arm)    | To understand what they liked and did not like about the intervention, why they did not link to ART, and suggestions on how to improve the intervention |
| Male participants who completed 4-week ART refill appointments by 4-months               | 50 (~ 16 per arm)    | To understand what they liked and did not like about the intervention, why they linked to ART, and suggestions on how to improve the intervention       |

#### 4.4.5. Sample size determination

Survey sample size details provided in Objective 1. The number of interviews required for qualitative data can be challenging to predict. Data should be collected until saturation is reached, meaning that no new themes or relevant information is emerging. The exact number of interviews required to reach saturation differs based on the aim of the study, the diversity in respondents, and the theoretical framework used for analysis.<sup>30</sup> However, a basic rule of thumb is that no sample size should be under 25 participants in order to reach saturation and identify all relevant themes or new information important to the study.

#### 4.4.6. Data analysis

**Surveys:** Subjects with complete data in outcomes as well as predictors will be included in the analysis. We will calculate descriptive statistics, including mean/median, variation (standard deviation, kurtosis), range, and frequency distributions for the demographic and clinical characteristics, overall and by study arm. Logistic models will be developed for the probability of a positive outcome, with sociodemographic factors included as covariates in a suitable form (linear/spline/factor). Differences in the prevalence of each of the outcomes of interest will be examined by study arm as well as by other factors of interest including demographic characteristics (e.g., age), couple characteristics, and knowledge/perceptions and biomedical knowledge. The differences will be evaluated using t-tests, Mann-Whitney U test (or other non-parametric tests), chi-square methods, and Fisher's exact test as appropriate.

**In-depth interviews:** Audio recordings of in-depth interviews will be transcribed and translated to English. A preliminary codebook will be developed for both interview types (male and female). Selected investigators will pilot a codebook by independently reading and coding a randomly-selected subset of transcripts. Through an iterative consultative process, each investigator will revise their respective codebook and repeat this process until there was high interrater reliability among the group. All

transcripts will be coded in Atlas.ti v8.3 using constant comparison, and coding disagreements were resolved by consensus.

#### 4.5. OBJECTIVE 3

##### **Determine the cost-effectiveness and scalability of the intervention arms through costing and mathematical modeling.**

- **Hypothesis 3.1:** The staged intervention will be more cost effective at having men initiate ART than both the lightest touch intervention and the intensive intervention.

##### **4.5.1. Study design**

We will conduct an incremental cost-effectiveness analysis and mathematical modelling to determine national scale-up potential. The average cost per successful outcome (early ART retention) will be calculated and compared across arms incrementally.

##### **4.5.2. Data collection techniques and tools**

Costs will be measured from the health care provider. We will use micro-costing methods by first creating an inventory of all the resources used to achieve the observed study outcomes including:

- Standard counseling interactions (staff cadre, training received, duration of interaction and distance from facility travelled where applicable)
- Motivational interviewing interactions (staff cadre, training received, duration of interaction and distance from facility travelled where applicable)
- Provider interactions (staff cadre, training received, duration of interaction and distance from facility travelled where applicable)
- Cost of reminder messages sent (when messages delivered telephonically instead of in person)

For each study patient, the quantity (number of units) of resources used will be determined. Unit costs of resources, which are not human subject data, will be obtained from external suppliers and the site's finance and procurement records and multiplied by the resource usage data to provide an average cost per study patient across centers in each study arm.

##### **4.5.3. Data analysis**

**Cost-Effectiveness:** Using the average cost per patient as described above, we will then estimate the cost per outcome achieved in each arm. The main measure of effectiveness for the cost-effectiveness analysis will be both the primary study outcome (early ART retention). We will calculate the difference in cost divided by the difference in effectiveness among study arms. Costs will be reported as means (standard deviations) and medians (IQRs) in USD, using the exchange rate prevailing during the follow up period.

**National scale-up modeling:** To determine the budget impact and affordability of the intervention arms, we will parameterize a national scale-up model using the study output. To determine the total cost and impact of the three intervention arms, as well as combinations of interventions, we will model cost and impact out to early ART retention (ART initiation and completion of the 4-week ART refill appointment). The following parameters to be estimated from this trial include:

- Percent of men not linking after HIVST (and thus eligible for this trial)



- Proportion of men that have not linked that could be reached
- Proportion of men that are known HIV-positive and on ART (not disclosed to their partner)
- Proportion of men that initiate ART
- Proportion of men that complete the 4-week ART refill appointment

We will then estimate the expected increase in the number of men linked to ART after index HIVST, adjusted by facility type where possible, by each intervention arm. The number of facility-level HIV tests conducted through index testing at all 652 public healthcare facilities in Malawi from Oct 2019-Sept 2020 will be used for these national calculations. Each intervention will be tested separately in this model, as well as different combination of interventions. Different scenarios will be explored where interventions are used at different facilities (urban versus rural targeting of interventions, geospatial targeting of interventions), or different groups of men within the same facility (where data suggest that different demographics of men respond differently to the different interventions).

The national-level costs and expected number of men linked to ART, by each intervention and combinations of interventions, will be reported from this model. We will then contextualize the national cost of each intervention with a short-term 3-year budget impact: percent increase (or decrease) of the national HIV treatment budget with the inclusion of one of these interventions

## 5. ETHICAL CONSIDERATIONS

There is minimal risk associated with the above-mentioned procedures. We have extensive experience measuring ART initiation within HIVST studies. We conducted the first trials in the region to objectively measure ART initiation among men after receiving HIVST through the Index HIVST Trial (PI: Dovel) and PASTAL Trial (male partners of antenatal clients; PI: Choko). We draw from lessons learned from our previous trials.

### *Informed Consent*

Informed consent will be obtained before any study-specific procedures are performed. The informed consent process will include information exchange, detailed discussion, and assessment of understanding of all required elements of informed consent, including the potential risks, benefits, and alternatives to study participation. The process will emphasize the randomized nature of the study and the differences that participants may experience as part of the study relative to current local standards of care. The study will include children 15 years of age and older. Following Malawian protocol, adolescents <18 years of age will be required to attain assent before completing the survey. Based on prior studies, we anticipate <10% of participants to be under 18 years of age, providing a small sample size to explore the potential impact of facility-based testing for youth.

### *Potential Benefits*

Men who participate in the study may have access to additional HIV services not usually provided through routine care, such as appointment reminders, peer navigation, motivational interviewing, and home-based ART initiation. Men can refuse these additional services at any point. Further, both men and women will have the opportunity to discuss their use of HIV services and any concerns with HIV as individuals or as a couple. Information learned in this study may be of benefit to participants and others in the future, particularly information that may lead to optimized testing guidelines.

### *Potential risks and discomforts*

Study procedures have minimal risk to the client. For men, maintaining privacy and confidentiality is a potential risk, particularly with home-based ART initiation. In our prior work delivering routine Index

1  
2  
3 HIVST, we have had health workers visit a cluster of homes (not just one) to avoid unwanted questions  
4 about the individual's serostatus. This has worked quite well, with no reports of unwanted disclosure, and  
5 we will use this approach in our proposed study to minimize risk of unwanted disclosure. Further, men  
6 may refuse any ART service at anypoint if they are uncomfortable.  
7

8 For women, increased intimate partner violence (IPV) may be a potential risk, particularly if their male  
9 partner is prone to violence. To reduse these risks, women who report IPV with their current partner in the  
10 past 12 months will be excluded from the study. Female ART clients who report IPV at anypoint of the  
11 intervention will be withdrawn from the study, along with their male partner, counseled, and referred to  
12 community-based resources for IPV. We also will provide extensive counseling on status disclosure and  
13 an IPV hotline to all female participants. Further, Our PASTAL and Index HIVST Trials show no sign of  
14 increased IPV and we have published extensively on risk factors for IPV in other settings.<sup>71-73</sup>  
15

16 Finally, Participation includes completion of a survey that will assess previous use of health services,  
17 perceptions of health services received, and sociodemographic and biomedical factors that may be  
18 associated with health service utilization. Participants may feel some psychological stress or discomfort  
19 from some of the questions, although most questions are not sensitive in nature. Participants may decline  
20 to answer any questions that make them uncomfortable and may end participation at any time.  
21

#### 22 *Reimbursement/compensation*

23 Participants will be provided MK 7,500 (equivalent to 10USD) for each survey completed (MK 15,000 /  
24 20USD across the duration of the study). They will receive the above compensation regardless if they use  
25 HIV services or not. Those who complete the additional in-depth interview 6-months after study  
26 enrollment will receive an additional MK 7,500 (equivalent to 10USD) for their time.  
27

#### 28 *Privacy and confidentiality*

29 All study procedures will be conducted in private, and every effort will be made to protect participant  
30 privacy and confidentiality to the extent possible. Participant information will not be released without  
31 written permission to do so except as necessary for review, monitoring, and/or auditing. All study-related  
32 information will be stored securely. Participant research records will be stored in locked areas with access  
33 limited to study staff. All study data will be identified by participant ID (PID) only. Likewise,  
34 communications between study staff and protocol team members regarding individual participants will  
35 identify participants by PID only. Process evaluation documents, such as intervention monitoring and  
36 evaluation tools, will only include PID and will not store PID and identifiers together. All local databases  
37 will be encrypted and secured with password-protected access systems. Lists, logbooks, appointment  
38 books, and any other documents that link PID numbers to personal identifying information will be stored  
39 in a separate, locked location in an area with limited access. For the intervention, home visits will be  
40 conducted by health workers who visit a cluster of homes (not just one) at one time in order to avoid  
41 unwanted questions about the individual's serostatus. This has been used in other interventions focused  
42 on partner testing and treatment with high success of removing unwanted disclosure to community  
43 members.  
44  
45  
46

## 47 **6. DISSMINATION OF RESULTS**

48  
49 This study will set the stage for interventions that combine HIVST with differentiated models for early  
50 ART retention in low-resource settings. The study is timely and of high-impact. Findings will establish  
51 the effectiveness of home-based ART among male HIVST users, and can directly inform HIV programs  
52 throughout the region. The dissemination plan was developed to achieve the most impact while still  
53 ensuring dissemination among local stakeholders who may immediately benefit from study findings.  
54

55 Partners in Hope is already integrated into national technical working groups, so dissemination will  
56 follow standard meeting schedules and draw upon Partners in Hope's longstanding history with the  
57  
58  
59

Ministry of Health. Additionally, we will disseminate results through presentations at international scientific meetings and through high-impact peer-reviewed journals. The mentorship team has extensive experience publishing in high-impact journals (e.g., *AJPH*, *AIDS*, *BMJ*, *Lancet HIV*, *JAIDS*, *PLOS Med*)

## 7. PERSONNEL ROLES AND INSTITUTIONS

The proposed research team includes clinical researchers and implementation science professionals with substantial experience in HIV testing, HIV prevention and treatment, cost effectiveness, differentiated care model studies, and male-focused studies and programs in Malawi and Sub-Saharan Africa. The study will be implemented in partnership with Partners in Hope Medical Center in Lilongwe, which has years of experience collaborating with Ministry of Health and local health facilities on similar studies, mentoring staff, and running studies embedded within routine clinical care.

- Kathryn Dovel, MPH, PhD, Principle Investigator, Division of Infectious Disease University of California Los Angeles (UCLA) and Research Director for Partners in Hope
- Thomas Coates, PhD, Co-Investigator, Division of Infectious Disease UCLA
- Risa Hoffman, MPH, MD, Co-Investigator, Division of Infectious Disease UCLA
- Brooke Nichols, Co-Investigator, School of Global Health, Boston University
- Lawrence Long, Co-Investigator, School of Global Health, Boston University
- Alemayehu Amberbir, Co-Investigator, Partners in Hope
- Augustine Choko, PhD, Site Co-Investigator, Malawi Liverpool Wellcome Trust
- Michal Kulich, Biostatistician, Charles University in Prague
- Julie Hubbard, MSc, Study Coordinator, Partners in Hope
- Kelvin Balakasi, Study Data Manager, Partners in Hope
- Khumbo Phiri, Implementation Science Manager, Partners in Hope

Dr. Kathryn Dovel, the Principle Investigator, is the Science Director at Partners in Hope and an Assistant Professor in the Division of Infectious Diseases at UCLA. Dr. Dovel has over ten years of experience in Malawi and collaborating with the study team. She is regularly involved in UNAIDS and WHO workshops and meetings regarding strategies for male engagement, and has been a consultant on two Ministry of Health guidelines on the topic in Malawi.

Dr. Augustine Choko will be responsible with Dr. Dovel for overall adherence to the study protocol and serve as the primary liaison with the local IRB and key stakeholders in Malawi. Dr. Thomas Coates will serve as the community-based trials specialist, with over two decades of experience conducting individual- and cluster-randomized trials in communities with the end goal of engagement in HIV services. Dr. Risa Hoffman is an established clinical investigator and will serve as the MD specializing in differentiated models of ART treatment delivery and HIV care, and ensuring client safety. Brooke Nichols and Lawrence Long will be responsible for reviewing all modeling data, making an analysis plan for the proposed models, and providing modeling for publications. Dr. Michal Kulich is the Chair of the Probability and Statistics Department at Charles University and has extensive experience with the design, conduct, and analysis of clinical trials in the context of HIV prevention research.

Partners in Hope's staff Kelvin Balakasi (Data Manager) Julie Hubbard (Research Coordinator), Khumbo Phiri (Implementation Science Manager) and Alemayehu Amberbir (Science Director) will be responsible implementation and oversight including data collection, data management, quality control, and training and certification of data entry personnel. They will also be responsible for ensuring the intervention promotes client safety, meets Ministry of Health guidelines, and is implemented in such a way to promote sustainability and scalability.

CV's for participating personnel are provided in the Appendix L.



## 8. REGULATORY OVERSIGHT

This study is sponsored by the Bill and Melinda Gates Foundation and implemented through Partners in Hope (PIH), Malawi. PIH staff will perform monitoring visits. As part of these visits, monitors will inspect study-related documentation to ensure compliance with all applicable regulatory requirements.

All health facilities will receive an Initial Registration Notification from PIH that indicates successful completion of the protocol registration process. A copy of the Initial Registration Notification will be retained in the site's regulatory files.

We have developed a trial advisory group. See Table 6 for details about the group members. The group will meet every quarter to review progress, and challenges with study implementation, and provide input on the final interventions to be tested, based on qualitative findings in Aim 1.

*Table 6. Description of trial advisory group*

| Name                 | Affiliation                                                                  | Expertise                                                                                                                                                                   |
|----------------------|------------------------------------------------------------------------------|-----------------------------------------------------------------------------------------------------------------------------------------------------------------------------|
| Dr. Morna Cornell    | University of Cape Town                                                      | Epidemiologist, health system barriers to men's care, men's HIV services, advocacy and policy change                                                                        |
| Dr. Heidi van Rooyen | SA Human Sciences Research Council                                           | Social scientist, HIV vulnerability and inequality, interventions for men's ART initiation                                                                                  |
| Dr. Deborah Donnell  | University of Washington, Fred Hutch Vaccine and Infectious Disease Division | Biostatistician, international HIV trials, PI of the HPTN Statistical and Data Management Center                                                                            |
| Dr. Connie Celum     | University of Washington                                                     | Infectious disease physician and epidemiologist, implementation science in Africa, HIV prevention trials                                                                    |
| Dr. Thoko Kalua      | Malawi Ministry of Health, Deputy Director at Department of HIV and AIDS     | Epidemiologist. Extensive experience in national HIV programs, M&E, and scale-up of interventions on the ground                                                             |
| Dr. Sergio Chicumbe  | Mozambique National Health Institute (INS), Health System Research Cluster   | Clinical trials and implementation science. Extensive experience in national public health programs, methodology for health services research and quality care improvement. |

For any future protocol amendments, upon receiving final IRB/EC and any other applicable regulatory entity approvals, sites should implement the amendment immediately. Sites are required to submit an amendment registration packet to the PIH Protocol Team. PIH key personnel will review the submitted protocol registration packet to ensure that all the required documents have been received.

## 9. STUDY IMPLEMENTATION

Study implementation at each site will be guided site-specific standard operating procedures (SOPs). These SOPs will be updated and/or supplemented as needed to describe roles, responsibilities, and procedures for this study.

## 10. PROTOCOL DEVIATION REPORTING

All protocol deviations will be documented in participant research records. Reasons for the deviations and corrective and preventive actions taken in response to the deviations will also be documented. Deviations will be reported to site IRBs/ECs and other applicable review bodies in accordance with the policies and procedures of these review bodies. Serious deviations that are associated with increased risk to one or more study participants and/or significant impacts on the integrity of study data must also be reported to the Protocol Team as soon as possible.

## 11. WORK PLAN TIMELINE

**Table 7:** Anticipated workplan timeline of study activities, by year

| IdeAL Study Timeline                                                                                               |        |   |   |   |        |   |   |   |        |   |   |   |        |   |   |   |
|--------------------------------------------------------------------------------------------------------------------|--------|---|---|---|--------|---|---|---|--------|---|---|---|--------|---|---|---|
| Activities                                                                                                         | Year 1 |   |   |   | Year 2 |   |   |   | Year 3 |   |   |   | Year 4 |   |   |   |
|                                                                                                                    | 1      | 2 | 3 | 4 | 1      | 2 | 3 | 4 | 1      | 2 | 3 | 4 | 1      | 2 | 3 | 4 |
| Preparation                                                                                                        | X      | X | X | X |        |   |   |   |        |   |   |   |        |   |   |   |
| <b>Objective 1:3. Test the effectiveness of models of varying intensity to link patients who use HIVST to care</b> |        |   |   |   |        |   |   |   |        |   |   |   |        |   |   |   |
| Enrollment                                                                                                         |        |   |   |   | X      | X | X | X |        |   |   |   |        |   |   |   |
| Intervention and follow-up                                                                                         |        |   |   |   | X      | X | X | X | X      | X |   |   |        |   |   |   |
| Follow-up analyses & writing                                                                                       |        |   |   |   |        |   |   |   |        | X | X | X | X      |   |   |   |
| <b>Objective 2: 4. Identify factors associated with early ART retention</b>                                        |        |   |   |   |        |   |   |   |        |   |   |   |        |   |   |   |
| Baseline sociodemographic survey                                                                                   |        |   |   |   | X      | X | X | X |        |   |   |   |        |   |   |   |
| Qualitative assessment- rolling                                                                                    |        |   |   |   | X      | X | X | X | X      | X |   |   |        |   |   |   |
| Analyses & writing                                                                                                 |        |   |   |   |        | X | X |   |        | X | X | X | X      |   |   |   |
| <b>Objective 3: 5. Determine the cost and scalability of the intervention</b>                                      |        |   |   |   |        |   |   |   |        |   |   |   |        |   |   |   |
| Data collection                                                                                                    |        |   |   |   | X      | X | X | X | X      | X |   |   |        |   |   |   |
| Synthesis of results and parameter estimation                                                                      |        |   |   |   |        |   |   |   |        | X |   |   |        |   |   |   |
| Model development                                                                                                  |        |   |   |   |        |   |   |   |        | X | X | X |        |   |   |   |
| Analyses & writing                                                                                                 |        |   |   |   |        |   |   |   |        | X | X | X | X      |   |   |   |

## 12. BUDGET AND JUSTIFICATION

**Table 8:** Study budget

| Description                            | USD   | Justification                                                                                              |
|----------------------------------------|-------|------------------------------------------------------------------------------------------------------------|
| Study Coordinator                      | 5000  | 25% LOE to coordinate RAs                                                                                  |
| Research Assistant for data collection | 15000 | 5 RAs for 6 months at 500 USD per month                                                                    |
| Incentive for participants             | 21720 | 10USD per study visit, 2 study visits per participant, 1086 participants (543 men and 543 female partners) |

|                                     |               |                                                                                                                             |
|-------------------------------------|---------------|-----------------------------------------------------------------------------------------------------------------------------|
| Expert Client/Nurse lunch allowance | 720           | 6USD lunch allowance for 10 Expert Clients and 10 nurses on a monthly basis to hear from them how the intervention is going |
| Telecommunications                  | 1000          | Mobile data collection processing by RAs and communication with coordinator                                                 |
| NHSRC application fee               | 150           | Application fee                                                                                                             |
| <i>Sub Total</i>                    | <i>43,590</i> |                                                                                                                             |
| NHSRC 10% fee                       | 4,359         | 10% contribution fee of study budget                                                                                        |
| <b>Grand total</b>                  | <b>47,949</b> |                                                                                                                             |

### 13. REFERENCES

1. Dovel K, Yeatman S, Watkins S, Poulin M. Men's heightened risk of AIDS-related death: the legacy of gendered HIV testing and treatment strategies. *AIDS (London, England)*. 2015;29(10):1123.
2. UNAIDS. *Ending AIDS: Progress towards 90-90-90 Targets.*; 2017.
3. Choko AT, Kumwenda MK, Johnson CC, et al. Acceptability of woman-delivered HIV self-testing to the male partner, and additional interventions: a qualitative study of antenatal care participants in Malawi. *Journal of the International AIDS Society*. 2017;20(1):21610.
4. Yeatman S, Chamberlin S, Dovel K. Women's (health) work: A population-based, cross-sectional study of gender differences in time spent seeking health care in Malawi. *PLoS one*. 2018;13(12).
5. Mills EJ, Beyrer C, Birungi J, Dybul MR. Engaging men in prevention and care for HIV/AIDS in Africa. *PLoS medicine*. 2012;9(2).
6. Malawi National Statistics Office. *Demographic Health Survey: Malawi.*; 2016.
7. Sharma M, Ying R, Tarr G, Barnabas R. Systematic review and meta-analysis of community and facility-based HIV testing to address linkage to care gaps in sub-Saharan Africa. *Nature*. 2015;528(7580):S77–S85.
8. Partners in Hope. Update on index partner testing in Partners in Hope supported sites: quarterly review. Presented at the: Malawi Ministry of Health Technical Working Group: HIV Self-Testing; 2019.
9. Dovel K, Balakasi K, Shaba F, Phiri K, Offorjebe O, Gupta S. A Randomized trial on index HIV self-testing for partners for ART clients in Malawi. In: *Conference on Retroviruses and Opportunistic Infections, Seattle.* ; 2019.
10. Johnson CC, Kennedy C, Fonner V, et al. Examining the effects of HIV self-testing compared to standard HIV testing services: a systematic review and meta-analysis. *Journal of the International AIDS Society*. 2017;20(1):21594.
11. Masters SH, Agot K, Obonyo B, Mavedzenge SN, Maman S, Thirumurthy H. Promoting partner testing and couples testing through secondary distribution of HIV self-tests: a randomized clinical trial. *PLoS medicine*. 2016;13(11).
12. Ortblad K, Musoke DK, Ngabirano T, et al. Direct provision versus facility collection of HIV self-tests among female sex workers in Uganda: a cluster-randomized controlled health systems trial. *PLoS medicine*. 2017;14(11).
13. MacPherson P, Lalloo DG, Webb EL, et al. Effect of optional home initiation of HIV care following HIV self-testing on antiretroviral therapy initiation among adults in Malawi: a randomized clinical trial. *Jama*. 2014;312(4):372–379.
14. Sibanda EL, Weller IV, Hakim JG, Cowan FM. The magnitude of loss to follow-up of HIV-exposed infants along the prevention of mother-to-child HIV transmission continuum of care: a systematic review and meta-analysis. *AIDS (London, England)*. 2013;27(17):2787.

15. Larsson EC, Thorson A, Nsabagasani X, Namusoko S, Popenoe R, Ekström AM. Mistrust in marriage-Reasons why men do not accept couple HIV testing during antenatal care-a qualitative study in eastern Uganda. *BMC public health*. 2010;10(1):769.
16. Koo K, Makin JD, Forsyth BW. Barriers to male-partner participation in programs to prevent mother-to-child HIV transmission in South Africa. *AIDS Education and Prevention*. 2013;25(1):14–24.
17. Theuring S, Nchimbi P, Jordan-Harder B, Harms G. Partner involvement in perinatal care and PMTCT services in Mbeya Region, Tanzania: the providers' perspective. *AIDS care*. 2010;22(12):1562–1568.
18. Sileo KM, Fielding-Miller R, Dworkin SL, Fleming PJ. What role do masculine norms play in men's HIV testing in sub-Saharan Africa?: a scoping review. *AIDS and Behavior*. 2018;22(8):2468–2479.
19. van den Berg W, Brittain K, Mercer G, et al. Improving men's participation in preventing mother-to-child transmission of HIV as a maternal, neonatal, and child health priority in South Africa. *PLoS medicine*. 2015;12(4).
20. Unaided HIV. *Addressing a Blind Spot in the Response to HIV—Reaching out to Men and Boys*. Joint United Nations Programme on HIV/AIDS Geneva; 2017.
21. Cornell M, Cox V, Wilkinson L. Public health blindness towards men in HIV programmes in Africa. *Tropical Medicine & International Health*. 2015;20(12):1634–1635.
22. Poulin M, Dovel K, Watkins SC. Men with money and the “vulnerable women” client category in an AIDS epidemic. *World Development*. 2016;85:16–30.
23. Pai NP, Sharma J, Shivkumar S, et al. Supervised and unsupervised self-testing for HIV in high-and low-risk populations: a systematic review. *PLOS medicine*. 2013;10(4).
24. Sharma M, Barnabas RV, Celum C. Community-based strategies to strengthen men's engagement in the HIV care cascade in sub-Saharan Africa. *PLoS medicine*. 2017;14(4).
25. Choko AT, MacPherson P, Webb EL, et al. Uptake, accuracy, safety, and linkage into care over two years of promoting annual self-testing for HIV in Blantyre, Malawi: a community-based prospective study. *PLoS medicine*. 2015;12(9).
26. Decroo T, Rasschaert F, Telfer B, Remartinez D, Laga M, Ford N. Community-based antiretroviral therapy programs can overcome barriers to retention of patients and decongest health services in sub-Saharan Africa: a systematic review. *International health*. 2013;5(3):169–179.
27. Wools-Kaloustian KK, Sidle JE, Selke HM, et al. A model for extending antiretroviral care beyond the rural health centre. *Journal of the International AIDS Society*. 2009;12(1):22–22.
28. Apondi R, Bunnell R, Awor A, et al. Home-based antiretroviral care is associated with positive social outcomes in a prospective cohort in Uganda. *JAIDS Journal of Acquired Immune Deficiency Syndromes*. 2007;44(1):71–76.
29. Jaffar S, Amuron B, Foster S, et al. Rates of virological failure in patients treated in a home-based versus a facility-based HIV-care model in Jinja, southeast Uganda: a cluster-randomised equivalence trial. *The Lancet*. 2009;374(9707):2080–2089.

- 1  
2  
3 30. Malterud K, Siersma VD, Guassora AD. Sample size in qualitative interview studies: guided by  
4 information power. *Qualitative health research*. 2016;26(13):1753–1760.  
5  
6  
7  
8  
9  
10  
11  
12  
13  
14  
15  
16  
17  
18  
19  
20  
21  
22  
23  
24  
25  
26  
27  
28  
29  
30  
31  
32  
33  
34  
35  
36  
37  
38  
39  
40  
41  
42  
43  
44  
45  
46  
47  
48  
49  
50  
51  
52  
53  
54  
55  
56  
57  
58  
59  
60

For peer review only

## 14. APPENDIX

### 14.1. APPENDIX A – Study Invitation Cards

---

**STUDY INVITATION CARD**  
**Identifying efficient linkage strategies for HIV self-testing (IDEaL)**  
 English

---

**Study invitation Card**

Date: ...../...../2020

Dear: \_\_\_\_\_

At \_\_\_\_\_, we are conducting a study. The study will generate information that will help the Malawi government, Partners in Hope and other stakeholders develop programs that will help your community lead a healthy life. We are therefore inviting you and your partner to come to \_\_\_\_\_ on \_\_\_\_\_ at \_\_\_\_\_, so that we can assess if you are eligible for the study. If eligible, you and your partner will each receive MK 7,500 (equivalent to 10USD).

Thank you for your kind attention to this request and we look forward to seeing you. When coming call or flash this number..... so that you are met by study personnel.

Sincerely,

[District Health Officer]

---

**STUDY INVITATION CARD**  
**Identifying efficient linkage strategies for HIV self-testing (IDEaL)**  
Chichewa

---

**Khadi Lokuyitanani Ku Kafukufuku**

Tsiku: ...../...../2020

Wokondedwa: \_\_\_\_\_

Ku chipatala cha, \_\_\_\_\_, tikupanga kafukufuku.

Kafukufukuyu adzathandiza kupeza mfundo zomwe zidzathandize boma la Malawi, bungwe la Partners In Hope ndi mabungwe/magulu ena kukhazikitsa ndondomeko zomwe zidzathandizire anthu a mdela lanu kukhala ndi umoyo wanthanzi. Choncho mukuyitanidwa pamodzi ndi okondedwa anu kuti mubwere ku \_\_\_\_\_ tsiku nthawi ya \_\_\_\_\_, ndicholinga choti tidzaone ngati muli oyenera kutenga nawo mbali mu kafukufukuyu. Mukadzapezeka kuti ndinu oyenera kutenga nawo mbali mu kafukufukuyu, inuyo komanso bwenzi lanu mudzalandira K7,500 (yokwana 10USD) aliyense.

Zikomo kwambiri chifukwa cha chidwi chanu pa pempholi ndipo ife tikuyembekezera kuzaonana nanu pa tsikuli. Mukamadzabwera, muzaimbe kapena kufulasha pa nambala iyi.....kuti muzakumane ndi anthu a kafukufukuyu.

Ndine wanu,

[District Health Officer]



## 14.2. APPENDIX B – Recruitment and Screening Script

---

### RECRUITMENT AND SCREENING SCRIPT

#### Identifying efficient linkage strategies for HIV self-testing (IDEaL)

Female

---

Thank you for speaking with me about the study entitled, “*Identifying efficient linkages strategies for HIVST*” conducted by Partners in Hope and the University of California Los Angeles in the United States. You are being approached because you recently reported that your male partner tested HIV-positive using a HIV self-test kit.

The purpose of this is to determine what are the best interventions that can help men who are diagnosed with HIV use other health services, if desired. The study will offer several different strategies for HIV services to see what works best for men who use HIV self-testing kits.

Would you be interested in participating in the eligibility screening to see if you are eligible to participate in the study? Your participation is voluntary and you will not be penalized if you choose not to participate in the screening or the project.

*[If no, thank the person and end the session]*

*[If yes, continue to the screening questions below or make an appointment to complete the screening questions]*

Before we continue with the study, we first need to determine if you are eligible to participate.

1. Are you and your partner 15 years old or older?
2. To the best of your knowledge, did your partner recently test HIV-positive using a HIV self-test kit?
3. To the best of your knowledge, your partner currently NOT taking ART?
4. Does your partner live in the facility catchment area?
5. In the last 30 days, your current partner has NEVER hit, slapped, or kicked you, or forced you to have sexual intercourse with them?

If you answered yes to all these questions, then you are eligible to participate in the study. You may stay here to continue with the study consent, and we will explain how the study will be conducted.

---

**RECRUITMENT AND SCREENING SCRIPT**  
**Identifying efficient linkage strategies for HIV self-testing (IDEaL)**  
Female (Chichewa)

---

*Zikomo kwambiri povemera kucheza nane zokhudza study yotchedwa “Kupeza njira zabwino zothandizira anthu omwe akulandira ma ARV” amene akupangidwa ndi bungwe la Partners In Hope-EQUIP polojekiti ndi sukulu ya ukachenjede ya University of California Los Angeles yaku Amerika. Mukufunsidwa kuti mutenge nawo mbali mu gawo lakafukufukuyu chifukwa bwenzi lanu lalimuna lili ndi kachiroombo ka HIV ndipo linadziwa zotsatirazi pogwiritsa ntchito ka chida koziyezera wekha.*

*Cholinga cha kafukufukuyu ndi kufuna kupeza njira zabwino zomwe zingathandize azibambo omwe ali ndi kachiroombo ka HIV kugwiritsa ntchito thandizo lina la zaumoyo, ngati akonda kutero. Studyyi idzapeleka njira zingapo zosiyanasiyana za thandizo la HIV kuti awone njira yomwe ikugwira bwino kwa azibambo omwe amagwiritsa nchito ka chida koziyezera wekha HIV.*

*Kodi muli okondwa kutenga nawo mbali mu mayele ofuna kuwona ngati muli oyenela kutenga nawo mbali mu study? Kutenga nawo mbali kwanu ndi kosakakamiza ndipo palibe chilango chilichonse ngati mungasankhe kusatenga nawo mbali mu mayele a study.*

*[Ngati ayi, thokozani munthuyo ndipo malizani session]*

*[Ngati eya, pitilizani kufunsa mafunso a mayele omwe ali munsiwa kapena sankhani tsiku loti muzamalize kufunsa mafunso]*

*Tisanapitilize ndi study, choyamba tifuna tidziwe ngati muli oyenera kutenga nawo mbali.*

- 1. Muli ndi zaka khumi ndi zisanu kapena kuposela apo?*
- 2. Monga mukudziwira kodi bwenzi lanu laziyezera kachida koziyezera wekha ndikupezeka ndi kachiroombo ka HIV?*
- 3. Monga mene mukudziwira, kodi pakadali pano bwenzi lanu likumwa mankhwala a ma ARV?*
- 4. Kodi bwenzi lanu limakhala mu dela lozungulira chipatala?*
- 5. M' masiku makumi atatu apitawa, bwenzi lanu SILINAPANGE izi kumenyani kapena kukakamizani kuti mugonane nalo?*

*Ngati mwayankha eya pa mafunso onse mwafunsidwawa, zikusonyeza kuti ndinu oyenera kutenga nawo mbali mu study. Muli omasuka kukhala ndikupitiliza chilolezo cha study, ndipo ndikufotokozerani za momwe study ichitikire.*

---

**RECRUITMENT AND SCREENING SCRIPT**  
**Identifying efficient linkage strategies for HIV self-testing (IDEaL)**  
Male

---

Thank you for speaking with me about the study entitled, “*Identifying efficient linkages strategies for HIVST*” conducted by Partners in Hope and the University of California Los Angeles in the United States. You are being approached because you recently reported testing HIV-positive using a HIV self-test kit.

The purpose of this is to determine what are the best interventions that can help men who are diagnosed with HIV use other health services, if desired. The study will offer several different strategies for HIV services to see what works best for men who use HIV self-testing kits.

Would you be interested in participating in the eligibility screening to see if you are eligible to participate in the study? Your participation is voluntary and you will not be penalized if you choose not to participate in the screening or the project.

*[If no, thank the person and end the session]*

*[If yes, continue to the screening questions below or make an appointment to complete the screening questions]*

Before we continue with the study, we first need to determine if you are eligible to participate.

1. Are you 15 years old or older?
2. You recently test HIV-positive using a HIV self-test kit?
3. You are NOT currently taking ART?
4. Do you live in the facility catchment area?

If you answered yes to all these questions, then you are eligible to participate in the study. You may stay here to continue with the study consent, and we will explain how the study will be conducted.

---

**RECRUITMENT AND SCREENING SCRIPT**  
**Identifying efficient linkage strategies for HIV self-testing (IDEaL)**  
Male (Chichewa)

---

*Zikomo kwambiri povemera kucheza nane zokhudza study yotchedwa “Kupeza njira zabwino zothandizira anthu omwe akulandira ma ARV” amene akupangidwa ndi bungwe la Partners In Hope-EQUIP polojekiti ndi sukulu ya ukachenjede ya University of California Los Angeles yaku Amerika. Mukufunsidwa kuti mutenge nawo mbali mu gawo lakafukufukuyu chifukwa muli ndi kachiroombo ka HIV ndipo munadziwa zotsatirazi pogwiritsa ntchito ka chida koziyezera wekha.*

*Cholinga cha kafukufukuyu ndi kufuna kuozeza njira zabwiino zomwe zingathandize azibambo omwe ali ndi kachiroombo ka HIV kugwiritsa ntchito thandizo lina la zaumoyo, ngati akonda kutero. Studyyi idzapeleka njira zingapo zosiyanasiyana za thandizo la HIV kuti awone njira yomwe ikugwira bwino kwa azibambo omwe amagwiritsa nchito ka chida koziyezera wekha HIV.*

*Kodi muli okondwa kutenga nawo mbali mu mayele ofuna kuwona ngati muli oyenela kutenga nawo mbali mu study? Kutenga nawo mbali kwanu ndi kosakakamiza ndipo palibe chilango chilichonse ngati mungasankhe kusatenga nawo mbali mu mayele a study.*

*[Ngati ayi, thokozani munthuyo ndipo malizani session]*

*[Ngati eya, pitilizani kufunsa mafunso a mayele omwe ali munsiwa kapena sankhani tsiku loti muzamalize kufunsa mafunso]*

*Tisanapitilize ndi study, choyamba tifuna tidziwe ngati muli oyenera kutenga nawo mbali.*

- 1. Muli ndi zaka khumi ndi zisanu kapena kuposela apo?*
- 2. Kodi mwaziyezera kachida koziyezera wekha ndikupezeka ndi kachiroombo ka HIV?*
- 3. Kodi pakadali pano mukumwa mankhwala a ma ARV?*
- 4. Kodi mumakhala mu dela lozungulira chipatala?*

*Ngati mwayankha eya pa mafunso onse mwafunsidwawa, zikusonyeza kuti ndinu oyenera kutenga nawo mbali mu study. Muli omasuka kukhala ndikupitiliza chilolezo cha study, ndipo ndikufotokozerani za momwe study ichitikire.*

### 14.3. APPENDIX C – Written Informed Consent- Female

---

#### WRITTEN INFORMED CONSENT Identifying efficient linkage strategies for HIV self-testing (IDEaL) Female

---

You are asked to participate in a research study entitled “*Identifying efficient linkages strategies for HIVST*” conducted by Partners in Hope and the University of California Los Angeles in the United States. You are being requested to take part in the study because you recently reported that your male partner tested HIV-positive using a HIV self-test kit. Your participation in this study is entirely voluntary. You will be read the information below, and you are free to ask questions about anything you do not understand, before deciding whether or not to participate. ***I as the field assistant for this study will take you through this consenting process.***

- **Why is this study being done?**

HIV self-testing is very helpful for people who want to know their status but do not usually go to the health facility. However, it can be hard for individuals who test HIV-positive with HIV self-testing to be able to access other health services. Researchers want to determine what are the best interventions that can help men who are diagnosed with HIV use other health services, if desired. The study will offer several different strategies for HIV services to see what works best for men who use HIV self-testing kits.

- **What will happen if you take part in this research study?**

There are several steps to this study. if you volunteer to participate in this study you will have the opportunity to participate in the following components:

1. Allow me to trace your male partner, or take me to your male partner in order to invite him to participate in the study as well. Note, you can choose to participate in the study even if your partner refuses or you think your partner would refuse.
2. Complete one or two study visits where a research assistant like myself will interview you and ask you information about yourself, including whether you are married, number of sexual partners, your level of education, information about your experiences with HIV services, and how you feel about HIV testing and treatment services. We will ask you questions today (or a day nearby that is convenient for you) and, if your partner enrolls in the study, we will ask you similar questions again in four months in order to see if anything has changed. Each interview will last about 45minutes. You can refuse a follow-up survey at any point

1  
2  
3  
4  
5  
6  
7  
8  
9  
10  
11  
12  
13  
14  
15  
16  
17  
18  
19  
20  
21  
22  
23  
24  
25  
26  
27  
28  
29  
30  
31  
32  
33  
34  
35  
36  
37  
38  
39  
40  
41  
42  
43  
44  
45  
46  
47  
48  
49  
50  
51  
52  
53  
54  
55  
56  
57  
58  
59  
60

3. If your partner agrees to participate in the study, he will be randomized to one of three interventions. We will do the randomization together with him so he can see exactly what intervention he will be offered. The potential interventions are:

- 1) Standard of care where providers may send him reminders about the benefits of health services.
- 2) Motivational Interviewing where he can talk to someone about his life, challenges he faces, and strategies to make his life better and additional services as needed.
- 3) Home-based health services whereby a provider will offer him HIV services and NCD screening at your home as a one-time event. He will then be visited after 4-weeks to be escorted to the clinic if desired.

Regardless of what arm your partner is randomized to, he can always refuse health services or refuse talking to a health care provider and still remain in the study. You can remain in the study regardless of what your partner does.

4. Finally, you may be randomly selected to within 6-months of the study to complete a 1-hour in-depth interview so we can learn more about your experiences in the study. Not all participants will be contacted for the interview and you always have the right to decline an in-depth interview – refusal will not affect your participation in the larger study.

- **How long will you be in the research study?**

All study activities will be completed within 6-months of today.

- **Are there any potential risks or discomforts that you can expect from this study?**

You will be asked a series of questions by a research assistant about your sexual relationship and your perceptions of your partners use of HIV and other health services. We will NEVER disclose your HIV status to your partner. We will NEVER disclose to your partner that you told us he had tested HIV+. However, you may feel uncomfortable answering some questions asked during the interview or you may feel comfortable having your partner in the study. You are able to withdraw from the study at any time. During an interview you can say “I don’t want to answer” to any questions that make you uncomfortable. All questions will be asked in a private place so that no one else will hear your answers.

If you experience distress or adverse events as a result of the study, we will provide you with counseling resources or refer you to resources for assistance.

- **Are there any potential benefits to participating?**

You will have the opportunity to discuss information about your well-being, your relationship with your partner, and HIV services for men with a Research Assistant in a confidential, private manner.

- **Are there any potential benefits to society?**

Information obtained as part of this work may be of benefit to the larger Malawi program, or similar programs in sub-Saharan Africa, since the work aims to determine if there are better ways to offer HIV services to men who use HIV self-test kits. If researchers better understand what

1  
2  
3 type of programs work better for men, the program in Malawi can be scaled up and strengthened  
4 to provide these specific types of increased support.  
5

6 **• Will you receive payment for being part of this study?**

7 Your participation is entirely voluntary. You will be provided MK 7,500 (equivalent to 10USD)  
8 for each survey completed (MK 15,000 / 20USD across the duration of the study). You will  
9 receive the above compensation regardless if you use HIV services or not. Those who complete  
10 the additional in-depth interview 6-months after study enrollment will receive an additional MK  
11 7,500 (equivalent to 10USD) for their time.  
12  
13

14  
15 **• What is the cost of participating in this study?**

16 There is no cost to participate in this study.  
17  
18

19  
20 **• Will information about me be kept confidential?**

21 The study team are the only people who will know about you or any information that you  
22 provide in this study. If necessary to protect your rights or welfare (for example, if you are  
23 injured and need emergency care) or if required by Malawian law, specific information about  
24 you may be made available to providers or officials.  
25

26 Authorized representatives of the Malawi National Health Sciences Research Council who are  
27 responsible for ensuring the rules related to research are followed, may need to review records of  
28 study participants. As a result, they may see your name; but they will not to reveal your identity  
29 to others.  
30

31 When the results of the research are published or discussed in meetings, no information will be  
32 included that would reveal your identity. Any paperwork related to the study which contains  
33 information about you will be kept in a locked cabinet in a locked office. Only staff members of  
34 the study will have access to this information. A code will be assigned to each individual  
35 participating in the study. This code will be stored on a computer in a locked file. The key to  
36 unlock the information will only be known by the research staff. All data entered into a  
37 computer will be entered using this code so information will no longer have any information that  
38 can identify you such as your name. Forms containing any identifying information will be  
39 destroyed two years after the study is finished.  
40  
41  
42

43 **• Participation and Withdrawal**

44 Your participation in this research is VOLUNTARY. If you choose not to participate, that will  
45 not affect your relationship with the hospital, your health provider or health centre you usually  
46 get your medical care from, or your right to health care. If you decide to participate, you are free  
47 to withdraw your consent and stop your participation at any time and can still receive future  
48 health care at the hospital or health center you go to.  
49  
50

51 **• Withdrawal of Participation by the Investigator**

52 The research investigator may stop your participation in this research if he or she feels this is  
53 best for you. The investigators will make the decision and let you know if it is not possible for  
54 you to continue. The decision may be made to protect your health and safety.  
55  
56  
57  
58  
59  
60



1  
2  
3 • **Who can answer questions I might have about this study?**  
4

5 In the event of a research related injury or if you experience a problem, please immediately  
6 return to the hospital or health centre you go to or contact Khumbo Phiri. The NHSRC Ministry  
7 of Health information (Dr. Mitambo) is also provided in case you have questions about your  
8 rights as a research participant.  
9

10 Kusiyitsidwa kutenga nawo mbali mu kafukufuku ndi wakafukufuku

11 Anthu opangitsa kafukufukuyu akhonza kukuletsani kutenga nawo mbali mukafukufukuyu  
12 akaona kuti ndi bwino kuti mutero. Anthu akafukufukuwa azapanga chiganizochi  
13 ndikukudziwitsani kuti sizitheka kuti mupitirize. Chiganizochi chitha kupangidwa kuti ateteze  
14 thanzi ndi chitetezo chanu.  
15

16 Investigator

17 Khumbo Phiri

18 Mobile: +265999840946

19 Partners in Hope Clinic

20 Area 36, Plot8

21 M1 Road South

22 Lilongwe, Malawi  
23  
24

25 OR

26 Dr.C. Mitambo

27 The Secretariate, NHSRC

28 Ministry of Health

29 P.O Box 30377

30 Lilongwe 3

31 Cell +265888344 443  
32  
33  
34  
35

36 **SIGNATURE OF RESEARCH SUBJECT [OR LEGAL REPRESENTATIVE]**  
37

38 I have read (or someone has read to me) the information provided above. I have been given an  
39 opportunity to ask questions and all of my questions have been answered to my satisfaction. I have been  
40 given a copy of this form.  
41

42 Ndawerenga (kapena munthu wina wandiwerengera) zonse zalembedwa mwambamu. Ndapatsidwa  
43 mwayi wofunsa mafunso ndi mafunso onse ndinafunsa ayankhidwa ndipo ndakhutusidwa. Ndapatsidwa  
44 pepala ina yangati yomweyi.  
45

46 **BY SIGNING THIS FORM, I WILLINGLY AGREE TO PARTICIPATE IN THE RESEARCH:**  
47

48 \_\_\_\_\_  
49  
50 Name of Subject  
51

52 \_\_\_\_\_  
53  
54 Name of Legal Representative (if applicable)  
55  
56  
57  
58  
59  
60

Fingerprint





---

**WRITTEN INFORMED CONSENT**  
**Identifying efficient linkage strategies for HIV self-testing (IDEaL)**  
 Female (Chichewa)

---

Mukufunsidwa kuti mutenge nawo mbali mu gawo lino la kafukufuku wotchchedwa”kupeza njira zoyenera zobwezeletsa anthu pa thandizo la ma ARV” amene akupangidwa ndi bungwe la Partners In Hope-EQUIP polojekiti ndi sukulu ya ukachenjede ya University of California Los Angeles yaku Amerika. Mukufunsidwa kuti mutenge nawo mbali mu gawo lakafukufukuyu chifukwa bwenzi lanu lalimuna linapezeka ndi kachiroambo ka HIV pogwiritsa ntchito kachida koziyezela wekha HIV. Kutenga nawo mbali mukafukufuku ameneyi sikokakamiza. Tikuwerengerani uthenga omwe walembedwa pansipa, ndipo muli oloedwa kufunsa mafunso aliwonse pa zomwe simukumvetsetsa, musanapange chiganizo chotenga nawo mbali kapena ayi. *Ine ngati othandizira mukafufuku ameneyu ndikuthandizani pa ndondomeko yotenga chilolezo.*

• **Chifukwa chiyani kafukufukuyu akuchitika?**

Kuziyeza wekha HIV ndi kofunika kwa anthu omwe akufuna kudziwa za momwe mthupi mwawo mulili ku mbali ya HIV koma sapita kuchipatala, kotelo, ndikovuta kwa anthu omwe apezeka ndi HIV kudzela chipangizo choziyezela wekha kuti apeze thandizo la zaumoyo. Akafukufuku akufuna apeze njira zabwino zomwe zingathe kuthandiza azibambo omwe apezeka ndi HIV kuti agwiritse ntchito thandizo lina lazaumoyo ngati angakonde kutero. Kafukufukuyu apeleka mwayi wa njira zosiyana siyana zothandizira HIV kuti aone zomwe zingagwire ntchito bwino kwa azibambo omwe amagwiritsa ntchito ka chida koziyezela wekha HIV.

• **Chichitike ndi chani mukatenga nawo mbali mu kafukufukuyu?**

Pali ma gawo angapo omwe adzachitike mukafukuku, Ngati mungazipereke kutenga nawo mbali mu kafukufukuyu mudzatenga nawo mbali mu magawo otsatirawa:

1. Mundilole kuti ndifufuze bwenzi lanu lalimuna kapena ndipelekezeni kwa bwenzi lanu lalimuna ndi cholinga choti nalonso litenge nawo gawo mu kafukufuku. Chidziwitso: muli omasuka kutenga nawo mbali mu kafukufu ngati bwenzi lanu lakana kutenga nawo mbali kapena mukuganiza kuti bwenzi lanu likana.
2. Pamapepo pa kucheza koyamba komanso kachiwiri othandiza kafukufuku ngati ine ndidzacheza nanu ndikufunsi mafunso okhuza inuyo, kuphatikizapo ngati muli pa banja, muli ndi abwenzi ogonana nawo angati, maphunziro anu komanso zomwe munakumana nazo polandira thandizo la HIV komanso momwe mumnvera kumbali ya thandizo la HIV angakhalenso kuyezedwa HIV. Tikufunsi mafunso lelo (Ngati lelo muli okonzeka kuyankha mafunsi)komanso miyezi inayi ikudzayi kuti tiwone ngati pali chomwe chasintha, kucheza kuli konse kuzitenga nthawi yosachepela makumi anayi ndi isanu. Muli oloedwa kukana kutenga nawo mbali mu kucheza kotsatira nthawi iliyonse.
3. Ngati bwenzi lanu lidzatenge nawo mbali mu study, adzaikidwa mu gulu limodzi mwa magulu atatu mwa mayere. Tidzachita mayere limodzi ndi bwenzi lanu kuti awone kuti ali ‘gulu liti mwa magulu atatuwa. Maguluwa ali motere:

- 1) Chikumbutso cha ubwino wa thandizo la zaumoyo
- 2) Kucheza kwa chilimbitso komwe mungathe ndi mwayi ocheza ndi anthu ena ndi kuwafotokozela za umoyo wanu, zofuta zomwe mumakumana nazo komanso njira zomwe mumagwiritsa ntchito kuti moyo wanu ukhale wosavuta.
- 3) Thandizo la zaumoyo lomwe mumatha kulandira pakhomo monga thandizo la HIV komanso NCD lomwe mumalandila kamodzi. Pakatha masaba anayi mudzayendeledwa ndi wa zaumoyo yemwe adzakupelekezeni ku chipatala komwe mukapitilize kulandira thandizo ngati mwakonda kutelo.

Posatengera njira yomwe mwapatsidwa mongathe kukana kulandira thandizo la zaumoyo koma ndikupitiliza kutenga nawo mbali mu kafukufuku ndipo tingathe kupitilizabe kucheza komwe tatchula m' mwambamu.

4. Pamapeto tidzakuyendelani pakutha kwa miyezi isanu ndi umodzi ya kafukufuku kuti tidzacheze nanu komanso kuti tidzanve za momwe mukunvera za kafukufuku, maganizo anu okhudza njira zina za mtsofola komanso, thandizo lina lowonjezera ngati ilipo. Si onse otenga nawo mbali omwe adzaonedwe ndipo muli oloedwa kukana kutenga nawo mbali mukucheza ndipo kukana kwanu sikudzaononga mwayi wanu otenga nawo mbali mu study.

- **Mutenga nthawi yaitali bwanji muli mukafukufuku?**

Zochitika zonse zakafukufuku zizamalizidwa mu miyezi isanu ndi imodzi.

- **Pali zinthu zosowetsa mtendere kapena zodetsa nkhwana zomwe mungayembekezere kuchokera mu kafukufukuyu?**

Mufunsidwa mafunso angapo ndi opangitsa kafukufuku okhudza maubwenzi anu ogonana komanso maganizo anu pa momwe abwenzi anu amagwiritsira thandizo la HIV ndi mathandizo ena a zaumoyo. SITIDZAULULA momwe mthupi mwanu muliri kumbali ya kachilombo ka HIV kwa bwenzi lanu. SITIDZAULURA kwa bwenzi lanu kuti munatiuza kuti ali ndi kachilombo ka HIV. Ngakhale zili choncho, mukhoza kusamasuka kuyankha mafunso ena mu kafukufuku kapenanso mukhoza kufuna kuti bwenzi lanu likhale nanu poyankha mafunsowa. Muli ndi ufulu osiya kutenga nawo gawo mu kafukufuku nthawi iliyonse. Mkati mwa kucheza kwathu, mukhoza kunena kuti “Sindikufuna kuyankha” ku funso lililonse lomwe sindinu omasuka kuyankha. Mafunso onse afunsidwa malo oduka mphepo kuti munthu wina aliyense asamve mayankho anu.

Ngati mungapeze mavuto kapena nkhwana mu mtima kamba kotenga nawo gawo mu kafukufukuyu, tikupatsani uphungu oyenera kapena kukulozerani koyenera kupeza thandizo.

- **Pali cholowa chilichonse potenga nawo mbali mukafukufukuyu?**

Mudzakhala ndi mwayi okambilana ndikunva zambiri zokhudza moyo wanu komanso thandizo la HIV ndi othandiza kafukufuku komanso dotolo munjira yachinsisi. Mudzakhalanso ndi mwayi oyamba mankhwala a ma ARV ku chipatala cha kufuna kwanu.

- **Pali cholowa chilichonse kwa anthu a mudera?**

Uthenga womwe udzatengedwe ngati mbali imodzi yakafukufukuyu uzakhala othandiza mu mapologalamu a dziko la Malawi, kapena ma pologalamu ena ofananirapo a kum' mwera kwa Africa, chifukwa choti ntchito imeneyi ikufuna kuona ngati pali njira yabwino yopeleka thandizo la HIV mwa

azibambo, ma pologalamu aku Malawi azapita patsogolo ndikulimbikitsa njira zopititsira patsogolo.

- **Kodi mulandira malipiro potenga nawo mbali mukafukufukuyu?**

Kutenga nawo mbali kosakakamiza. Mudzalandira chiongola dzanja cha ndalama zokwana 7,500(Pafupifupi MK 15,000/20USD). Mudzalandira ndalamazi olo mutakhala kuti simunatenge nawo kapena mwatenga nawo mbali mu thandizo la HIV. Kwa omwe adzamalize nawo kucheza kowonjezera patatha miyezi isanu ndi umodzi adzalandira ndalama yowonjezera yokwana MK 7,500 (yokwana pafupi fupi 10 USD0 chifukwa cha nthawi yawo.

- **Kodi pali kulipira kulikonse chifukwa chotenga nawo mbali mukafukufukuyu?**

Kutenga nawo mbali mukafukufukuyu ndi kwaulere.

- **Kodi uthenga wanga uzasungidwa mwa chinsinsi?**

Anthu ogwira nawo ntchito mu kafukufuku okhawo ndi amene adziwe za uthenga wanu kapena chilichonse chomwe mutiuze pa kafukufukuyu.

Anthu ovomerezeka oyimirira bungwe la National Health Sciences Research Council ndi UCLA office for Protection Of Research Subjects ndi amene ali ndi udindo wootsetsa kuti malamulo a kafukufuku akutsatidwa, akhoza kufuna kuona nawo kaundula wa anthu amene akutenga nawo mbali mukafukufukuyu. Kutanthauza kuti akhonza kuzaona dzina lanu; koma sangaulure zokhuza inu kwa anthu ena.

Pa nthawi imene zotsatira za kafukufukuyu zidzatsindikidwa kapena kukambidwa mu misonkhano, palibe uthenga womwe udzayikidwe wokuzindikiritsani. Uthenga uliwonse wolembedwa pa pepala wokhunza inu uzasungidwa mu kabati yokhoma mu ofesi yokhomanso. Anthu ogwira nawo ntchito mukafukufukuyu okhawo ndi amene azathe kuona uthenga umenewu. Njira yotanthauzira uthenga umenewu izadziwika ndi anthu akafukufukuyu basi. Uthenga onse olowetsedwa pa makina a kompyuta uzalowetsedwa kugwiritsa ntchito nambala, ndekuti uthenga onse sudzakhalanso ndi zokuzindikiritsani monga dzina lanu. Ma pepala amene pali uthenga okuzindikitsani adzawonongedwa pakapita zaka ziwiri chimalizireni kafukufukuyu.

- **Kutenga mbali ndi kusiya kutenga mbali**

Kutenga nawo mbali mu kafukufukuyu SIKOKAKAMIZA. Ngati musankhe kuti simutenga nawo mbali, izi sizingasokoneze ubale wanu ndi chipatala chino, anthu ogwira ntchito kuchipatala, kapena chipatala chomwe mumalandilirako chithandizo, kapena ufulu wanu wolandira thandizo la chipatala. Ngati mwapanga chisankho chotenga nawo mbali, mukhoza kuchosa chilolezo chanu ndikusiya kutenga nawo mbali nthawi ina iliyonse ndipo mungathe kuzalandirabe chithandizo pa chipatala pano mtsogolo.

- **Kusiyitsidwa kutenga nawo mbali mu kafukufuku ndi wakafukufuku**

Anthu opangitsa kafukufukuyu akhonza kukuletsani kutenga nawo mbali mukafukufukuyu akaona kuti ndi bwino kuti mutero. Anthu akafukufukuwa azapanga chiganizochi ndikukudziwitsani kuti sizitheka kuti mupitirize. Chiganizochi chitha kupangidwa kuti ateteze thanzi ndi chitetezo chanu.

1  
2  
3 • **Angayankhe ndi ndani mafunso amene ndingakhale nawo wokhuza kafukufukuyu?**  
4

5 Zitachitika kuti mwavulala kamba ka kafukufukuyu kapena mukukumana ndi vuto, chonde bwelerani  
6 mwachangu kuchipatala chomwe munapitako kapena lumikizanani ndi Mike Nyirenda. Bungwe la  
7 NHSRC Ministry of Health information kudzera mwa Dr Kathyola liliponso ngati mungakhale ndi  
8 mafunso okhudza ufulu wanu ngati munthu wotenga nawo mbali mu kafukufuku.  
9

10  
11 Investigator  
12 Khumbo Phiri  
13 Mobile: +265999840946  
14 Partners in Hope Clinic  
15 Area 36, Plot8  
16 M1 Road South  
17 Lilongwe, Malawi  
18

19  
20 OR

21 Dr.C. Mitambo  
22 The Secretariate, NHSRC  
23 Ministry of Health  
24 P.O Box 30377  
25 Lilongwe 3  
26 Cell +265888344 443  
27  
28  
29

30 **SAYINI YA OTENGA NAWO MBALI [KAPENA YA OYIMIRA OTENGA NAWO MBALI]**  
31

32 Ndawerenga (kapena munthu wina wandiwerengera) zonse zalembedwa mwambamu. Ndapatsidwa  
33 mwayi wofunsa mafunso ndi mafunso onse ndinafunsa ayankhidwa ndipo ndakhutusidwa.  
34 Ndapasidwa pepala ina yangati yomweyi.  
35

36 POSAYINA PA PEPALALI, NDIKUVOMERA MOSAKAKAMIZIDWA KUTENGA NAWO  
37 MBARI MU KAFUKUFUKU:  
38  
39

40 \_\_\_\_\_  
41 Name of Subject  
42  
43

44 \_\_\_\_\_  
45 Name of Legal Representative (if applicable)  
46  
47

48  Fingerprint  
49

50 \_\_\_\_\_ DATE (DAY/MO/YR): \_\_\_\_\_

51 Signature of Subject or Legal Representative

52 (may place an X OR fingerprint if unable to sign)  
53  
54  
55  
56  
57  
58  
59  
60

**SAYINI YA OFUNSA MAFUNSO**

Ndamufotokozero otenga nawo mbali/oyimirira otenga nawo mbali za kafukufukuyu ndipo ndayankha mafunso onse amene anali nawo. Ndikukhulupirira kuti amvetsetsa uthenga onse omwe uli chikalata cha uthengawu ndipo avomera kutenga nawo mbali mwa kufuna kwao.

\_\_\_\_\_

Dzina la ofunsa mafunso kapena oyimira akafukufuku

\_\_\_\_\_

Sayini ya ofunsa mafunso kapena oyimira akafukufuku

\_\_\_\_\_

Date (must be the same as subject's)

#### 14.4.APPENDIX D: Written Informed Consent – Male

---

### WRITTEN INFORMED CONSENT

#### Identifying efficient linkage strategies for HIV self-testing (IDEaL)

##### Male

---

You are asked to participate in a research study entitled “*Identifying efficient linkages strategies for HIVST*” conducted by Partners in Hope and the University of California Los Angeles in the United States. You are being requested to take part in the study because you recently received a self-test kit and reported recently testing HIV-positive. Your participation in this study is entirely voluntary. You will be read the information below, and you are free to ask questions about anything you do not understand, before deciding whether or not to participate. *I as the field assistant for this study will take you through this consenting process.*

- **Why is this study being done?**

HIV self-testing is very helpful for people who want to know their status but do not usually go to the health facility. However, it can be hard for individuals who test HIV-positive with HIV self-testing to be able to access other health services. Researchers want to determine what are the best interventions that can help men who are diagnosed with HIV use other health services, if desired. The study will offer several different strategies for HIV services to see what works best for men who use HIV self-testing kits.

- **What will happen if you take part in this research study?**

There are several steps to this study. If you volunteer to participate in this study you will have the opportunity to participate in the following components:

1. Complete two study visits where a research assistant like myself will interview you and ask you information about yourself, including whether you are married, number of sexual partners, your level of education, information about your experiences with HIV services, and how you feel about HIV testing and treatment services. We will ask you questions today (or a day that is convenient for you) and in four months in order to see if anything has changed. Each interview will last about 45minutes. You can refuse a follow-up survey at any point.
2. After completing the first interview you will be randomized to one of three interventions. We will do the randomization together so you can see exactly what you will be offered. Based on what intervention you are randomly selected for, you will also be offered a variety of health services from health facility staff. The potential interventions are:
  - a) Reminders about the benefits of health services;
  - b) Motivational Interviewing where you can talk to someone about your life, challenges you face, and strategies to make your life and better, and additional services as needed
  - c) Home-based health services whereby a provider will offer you HIV services and NCD screening at your home as a one-time event. After four weeks, you will be visited by a health care worker who will escort you to the clinic for continued health services if desired.

Regardless of what arm you are randomized to, you can always refuse health services or refuse talking to a health care provider and still remain in the study. Even if you do not plan to use any additional



1  
2  
3 health services, don't worry, you can still be in the study and we can still complete the interviews we  
4 discussed above.  
5

6 3. In the first 6 months of the study, we will also review medical records at your local health facility to  
7 see if you visited the health facility since enrolling in the study. This does not require interaction  
8 with you and will be completely confidential.  
9

10 4. Finally, we may contact you within 6-months of the study to complete another in-depth interview so we  
11 can learn more about your experience with the study, recommendations for future interventions, and  
12 what additional services, if any, you would like. Not all participants will be contacted for the  
13 interview and you always have the right to decline an in-depth interview – refusal will not affect  
14 your participation in the larger study.  
15

16 • **How long will you be in the research study?**

17 All study activities will be completed within 6-months of today.  
18

19 • **Are there any potential risks or discomforts that you can expect from this study?**

20 You will be asked a series of questions by a research assistant about your sexual history and your  
21 experience receiving and using a self-test kit from your sexual partner. You may feel uncomfortable  
22 answering some of the questions asked by the interviewer. You can say “I don't want to answer” to any  
23 questions that make you uncomfortable. All questions will be asked in a private place so that no other  
24 patients or staff will hear your answers.  
25

26 If you agree to participate in the assigned intervention, providers may ask to reach you at home or in the  
27 community. As with any health service, if you choose to initiate ART you may be at risk of unwanted  
28 status disclosure.  
29

30 If you experience distress or adverse events, we will provide you with counseling resources or refer you  
31 to resources for assistance.  
32

33 • **Are there any potential benefits to participating?**

34 You will have the opportunity to discuss information about your well-being and HIV services with a  
35 Research Assistant and possibly a health care provider and in a confidential, private manner. You will  
36 also have the chance to link to HIV care services at the facility of your choosing.  
37

38 • **Are there any potential benefits to society?**

39 Information obtained as part of this work may be of benefit to the larger Malawi program, or similar  
40 programs in sub-Saharan Africa, since the work aims to determine if there are better ways to offer HIV  
41 services to men who use HIV self-test kits. If researchers better understand what type of programs work  
42 better for men, the program in Malawi can be scaled up and strengthened to provide these specific types  
43 of increased support.  
44

45 • **Will you receive payment for being part of this study?**

46 Your participation is entirely voluntary. You will be provided MK 7,500 (equivalent to 10USD) for each  
47 survey completed (MK 15,000 / 20USD across the duration of the study). You will receive the above  
48 compensation regardless if you use HIV services or not. Those who complete the additional in-depth  
49 interview 6-months after study enrollment will receive an additional MK 7,500 (equivalent to 10USD) for  
50 their time.  
51

52 • **What is the cost of participating in this study?**

53 There is no cost to participate in this study.  
54  
55  
56  
57  
58  
59  
60



1  
2  
3  
4  
5

- **Will information about me be kept confidential?**

6 Authorized representatives of the Malawi National Health Sciences Research Council who are responsible  
7 for ensuring the rules related to research are followed, may need to review records of study participants.  
8 As a result, they may see your name; but they will not to reveal your identity to others.  
9

10 When the results of the research are published or discussed in meetings, no information will be included  
11 that would reveal your identity. Any paperwork related to the study which contains information about you  
12 will be kept in a locked cabinet in a locked office. Only staff members of the study will have access to  
13 this information. A code will be assigned to each individual participating in the study. This code will be  
14 stored on a computer in a locked file. The key to unlock the information will only be known by the  
15 research staff. All data entered into a computer will be entered using this code so information will no  
16 longer have any information that can identify you such as your name. Forms containing any identifying  
17 information will be destroyed two years after the study is finished.  
18

19

- **Participation and Withdrawal**

20 Your participation in this research is VOLUNTARY. If you choose not to participate, that will not affect  
21 your relationship with the hospital, your health provider or health centre you usually get your medical  
22 care from, or your right to health care. If you decide to participate, you are free to withdraw your consent  
23 and stop your participation at any time and can still receive future health care at the hospital or health  
24 center you go to.  
25

26

- **Withdrawal of Participation by the Investigator**

27 The research investigator may stop your participation in this research if he or she feels this is best for you.  
28 The investigators will make the decision and let you know if it is not possible for you to continue. The  
29 decision may be made to protect your health and safety.  
30

31

- **Who can answer questions I might have about this study?**

32 In the event of a research related injury or if you experience a problem, please immediately return to the  
33 hospital or health centre you go to or contact Mike Nyirenda. The NHSRC Ministry of Health  
34 information (Dr. Kathyola) is also provided in case you have questions about your rights as a research  
35 participant.  
36

37 Investigator:

38 Khumbo Phiri  
39 Mobile: +265999840946  
40 Partners in Hope Clinic  
41 Area 36, Plot8  
42 M1 Road South  
43 Lilongwe, Malawi  
44

45 OR

46 Dr.C. Mitambo  
47 The Secretariate, NHSRC  
48 Ministry of Health  
49 P.O Box 30377  
50 Lilongwe 3  
51 Cell +265888344 443  
52  
53  
54  
55  
56  
57  
58  
59  
60

**SIGNATURE OF RESEARCH SUBJECT [OR LEGAL REPRESENTATIVE]**

I have read (or someone has read to me) the information provided above. I have been given an opportunity to ask questions and all of my questions have been answered to my satisfaction. I have been given a copy of this form.

**BY SIGNING THIS FORM, I WILLINGLY AGREE TO PARTICIPATE IN THE RESEARCH:**

\_\_\_\_\_  
Name of Subject

\_\_\_\_\_  
Name of Legal Representative (if applicable)

\_\_\_\_\_  
DATE (DAY/MO/YR): \_\_\_\_\_

\_\_\_\_\_  
Signature of Subject or Legal Representative  
(may place an X OR fingerprint if unable to sign)

**SIGNATURE OF INVESTIGATOR OR DESIGNEE**

I have explained the research to the subject or his/her legal representative and answered all of his/her questions. I believe that he/she understands the information described in this document and freely consents to participate.

\_\_\_\_\_  
Name of Investigator or Designee

\_\_\_\_\_  
Signature of Investigator or Designee

\_\_\_\_\_  
Date (must be the same as subject's)

---

**WRITTEN INFORMED CONSENT**  
**Identifying efficient linkage strategies for HIV self-testing (IDEaL)**  
 Male (Chichewa)

---

Mukufunsidwa kuti mutenge nawo mbali mu gawo lino la kafukufuku wotchedwa”kupeza njira zoyenera zobwezeletsa anthu pa thandizo la ma ARV” amene akupangidwa ndi bungwe la Partners In Hope-EQUIP polojekiti ndi sukulu ya ukachenjeda ya University of California Los Angeles yaku Amerika. Mukufunsidwa kuti mutenge nawo mbali mu gawo lakafukufukuyu chifukwa muli ndi kachirokoma ka HIV komanso mwalandila kachipangizo koziyezela wekha HIVi. Kutenga nawo mbali mukafukufuku ameneyi sikokakamiza. Tikuwerengerani uthenga omwe walembedwa pansipa, ndipo muli oloedwa kufunsa mafunso aliwonse pa zomwe simukumvetsetsa, musanapange chiganizo chotenga nawo mbali kapena ayi. Ine ngati othandizira mukafufuku ameneyu ndikuthandizani pa ndondomeko yotenga chilolezo.\*

**Chifukwa chiyani kafukufukuyu akuchitika?**

Kuziyeza wekha HIV ndi kofunika kwa anthu omwe akufuna kudziwa za momwe mthupi mwawo mulili ku mbali ya HIV koma sapita kuchipatala, kotelo, ndikovuta kwa anthu omwe apezeka ndi HIV kudzela chipangizo choziyezela wekha kuti apeze thandizo la zaumoyo. Akafukufuku akufuna apeze njira zabwino zomwe zingathe kuthandiza azibambo omwe apezeka ndi HIV kuti agwiritse ntchito thandizo lina lazaumoyo ngati angakonde kutero. Kafukufukuyu apeleka mwayi wa njira zosiyana siyana zothandizira HIV kuti aone zomwe zingagwire ntchito bwino kwa azibambo omwe amagwiritsa ntchito ka chida koziyezela wekha HIV.

**Chichitike ndi chani mukatenga nawo mbali mu kafukufukuyu?**

Pali ma gawo angapo omwe adzachitike mukafukuku, Ngati mungazipereke kutenga nawo mbali mu kafukufukuyu mudzatenga nawo mbali mu magawo otsatirawa:

- Akafukufuku adzakuyendera kawiri. Ulendo woyamba tidzapemphani kuti mutenge nawo mbali mu kafukufuku yemwe tidzakufunsi zokhuza inuyo, kuphatikizapo ngati muli pa banja, muli ndi abwenzi ogonana nawo angati, maphunziro anu komanso zomwe munakumana nazo polandira thandizo la HIV komanso momwe mumvera kumbali ya thandizo la HIV angakhale kuyezedwa HIV. Tikufunsani mafunso lelo (Ngati lelo muli okonzeka kuyankha mafunso) komanso miyezi inayi ikudzayi kuti tiwone ngati pali chomwe chasintha, kucheza kuli konse kuzitenga nthawi yosachepela makumi anayi ndi isanu. Muli oloedwa kukana kutenga nawo mbali mu kucheza kotsatira nthawi iliyonse.
2. Pamapepo pa kucheza koyamba mudzayikidwa mu imodzi mwa njira zitatatu popanda ndondomeko iliyonse, pa nthawi yomwe mudzakhale mukuyikidwa mu njirayi mudzakhala muli pomwepo kuti muone njira yomwe mwapatsidwa. Potengera njira yomwe mwayikidwa mudzapatsidwanso mwayi wa mathandizo a zaumoyo angapo ochoka kwa opeleka thandizo la zaumoyo pa chiptala, zina mwa njira ndi:

- a) Chikumbutso cha ubwino wa thandizo la zaumoyo

- 1  
2  
3 b) Kucheza kwa chilimbitso komwe mungathe ndi mwayi ocheza ndi anthu ena ndi  
4 kuwafotokozela za umoyo wanu, zofuta zomwe mumakumana nazo komanso njira zomwe  
5 mumagwiritsa ntchito kuti moyo wanu ukhale wosavuta.  
6  
7 c) Thandizo la zaumoyo lomwe mumatha kulandira pakhomo monga thandizo la HIV  
8 komanso NCD lomwe mumalandila kamodzi. Pakatha masaba anayi mudzayendeledwa ndi  
9 wa zaumoyo yemwe adzakupelekezeni ku chipatala komwe mukapitilize kulandira  
10 thandizo ngati mwakonda kutelo.

11 Posatengera njira yomwe mwapatsidwa mongathe kukana kulandira thandizo la zaumoyo koma  
12 ndikupitiliza kutenga nawo mbali mu kafukufuku ndipo tingathe kupitilizabe kucheza komwe  
13 tatchula m'mwambamu.

- 14  
15 3. Miyezi isanu ndi umodzi yoyambilira ya kafukufuku tidzaona zambiri ya umoyo wanu ku chipatala cha  
16 m'dela lanu ngati munapitako mutalowa kale mu kafukufuku, zimenezi sizidzafuika kulankhula  
17 nanu ndipo zidzachitika mwachinsinsi.  
18 4. Pamapeto tidzakuyendelani pakutha kwa miyezi isanu ndi umodzi ya kafukufuku kuti tidzacheze nanu  
19 komanso kuti tidzanve za momwe mukunvera za kafukufuku, maganizo anu okhudza njira zina za  
20 mtsogolo komanso, thandizo lina lowonjezera ngati ilipo. Si onse otenga nawo mbali omwe  
21 adzaonedwe ndipo muli oloedwa kukana kutenga nawo mbali mukucheza ndipo kukana kwanu  
22 sikudzaononga mwayi wanu otenga nawo mbali mu study.  
23

### 24 **Mutenga nthawi yaitali bwanji muli mukafukufuku?**

25 Zochitika zonse zakafukufuku zizamalizidwa pa miyezi isanu ndi umodzi (6) kuchokera lero.  
26  
27  
28

### 29 **Pali zinthu zosowetsa mtendere kapena zodetsa nkhwawa zomwe mungayembekezere kuchokera mu** 30 **kafukufukuyu?**

31 Muzafunsidwa mndandanda wa mafunso ndi othandizira mukafukufuku ameneyi zokhuza mbiri yanu  
32 pankhani zogonana ndi zochitika mutalandira ka chida koziyeza wekha kuchokera kwa bwezi wanu  
33 ogonana naye komanso mmene munagwiritsira ntchito. Mutha kukhala osamasuka poyankha mafunso ena  
34 omwe wofunsa mafunso angafunse. Mutha kunena kuti “sindikufuna kuyankha” kufunso lilironse lomwe  
35 simukumasuka nalo. Mafunso onse azafunsidwa pa malo achinsinsi pomwe odwala anzanu kapena  
36 ogwira ntchito pachipatala sadzamva nawo mayankho anu.  
37  
38

39 Ngati mudzavomere kutenga nawo mbali mu imodzi mwa njira, a zaumoyo adzakufunsani kuti akupezeni  
40 kunyumba kwanu kapena mu dela lanu. Monga mwa thandizo lililonse la zaumoyo, ngati mungavomere  
41 kuyamba kumwa mankhwala a ma ARV mungathe kukhala pa chiospyezo choulula za momwe mulili  
42 m'mthupi mwano mosafuna.

43 Ngati mungakumane ndi masautso aliwonse, tidzakupatsani uphungu kapena kukutumizani koti  
44 mukathandizidwe ndi uphungu.  
45  
46  
47

### 48 **Pali cholowa chilichonse potenga nawo mbali mukafukufukuyu?**

49 Mudzakhala ndi mwayi okambilana ndikunva zambiri zokhudza moyo wanu komanso thandizo la HIV  
50 ndi othandiza kafukufuku komanso dotolo munjira yachinsisi. Mudzakhalanso ndi mwayi oyamba  
51 mankhwala a ma ARV ku chipatala cha kufuna kwanu.  
52  
53

### 54 **Pali cholowa chilichonse kwa anthu a mudera?**

1  
2  
3 Uthenga womwe udzatengedwe ngati mbali imodzi yakafukufukuyu uzakhala othandiza mu  
4 mapologalamu a dziko la Malawi, kapena ma pologalamu ena ofananirapo a kum'mwera kwa Africa,  
5 chifukwa choti ntchito imeneyi ikufuna kuona ngati pali njira yabwino yopeleka thandizo la HIV mwa  
6 azibambo, ma pologalamu aku Malawi azapita patsogolo ndikulimbikitsa njira zopititsira patsogolo.  
7

### 8 9 **Kodi mulandira malipiro potenga nawo mbali mukafukufukuyu?**

10 Kutenga nawo mbali kosakakamiza. Mudzalandira chiongola dzanja cha ndalama zokwana  
11 7,500(Pafupifupi MK 15,000/20USD). Mudzalandila ndalamazi olo mutakhala kuti simunatenge nawo  
12 kapena mwatenga nawo mbali mu thandizo la HIV. Kwa omwe adzamalize nawo kucheza kowonjezera  
13 patatha miyezi isanu ndi umodzi adzalandira ndalama yowonjezera yokwana MK 7,500 (yokwana pafupi  
14 fupi 10 USD0 chifukwa cha nthawi yawo.  
15  
16

### 17 18 **Kodi pali kulipira kulikonse chifukwa chotenga nawo mbali mukafukufukuyu?**

19 Kutenga nawo mbali mukafukufukuyu ndi kwaulere.  
20  
21

### 22 23 **Kodi uthenga wanga uzasungidwa mwa chinsinsi?**

24 Anthu ogwira nawo ntchito mu kafukufuku okhawo ndi amene adziwe za uthenga wanu kapena  
25 chilichonse chomwe mutiuze pa kafukufukuyu.  
26

27 Anthu ovomerezeka oyimirira bungwe la National Health Sciences Research Council ndi UCLA office  
28 for Protection Of Research Subjects ndi amene ali ndi udindo wootsetsa kuti malamulo a kafukufuku  
29 akutsatidwa, akhoza kufuna kuona nawo kaundula wa anthu amene akutenga nawo mbali  
30 mukafukufukuyu. Kutanthauza kuti akhonza kuzaona dzina lanu; koma sangaulure zokhuza inu kwa  
31 anthu ena.  
32

33 Pa nthawi imene zotsatira za kafukufukuyu zidzatsindikidwa kapena kukambidwa mu misonkhano, palibe  
34 uthenga womwe udzayikidwe wokuzindikiritsani. Uthenga uliwonse wolembedwa pa pepala wokhunza  
35 inu uzasungidwa mu kabati yokhoma mu ofesi yokhomanso. Anthu ogwira nawo ntchito  
36 mukafukufukuyu okhawo ndi amene azathe kuona uthenga umenewu. Njira yotanthauzira uthenga  
37 umenewu izadziwika ndi anthu akafukufukuyu basi. Uthenga onse olowetsedwa pa makina a kompyuta  
38 uzalowetsedwa kugwiritsa ntchito nambala, ndekuti uthenga onse sudzakhanso ndi zokuzindikiritsani  
39 monga dzina lanu. Ma pepala amene pali uthenga okuzindikitsani adzawonongedwa pakapita zaka ziwiri  
40 chimalizireni kafukufukuyu.  
41

42 Kutenga nawo mbali mu kafukufukuyu SIKOKAKAMIZA. Ngati musankhe kuti simutenga nawo mbali,  
43 izi sizingasokoneze ubale wanu ndi chipatala chino, anthu ogwira ntchito kuchipatala, kapena chipatala  
44 chomwe mumalandilirako chithandizo, kapena ufulu wanu wolandira thandizo la chipatala. Ngati  
45 mwapanga chisankho chotenga nawo mbali, mukhoza kuchosa chilolezo chanu ndikusiya kutenga nawo  
46 mbali nthawi ina iliyonse ndipo mungathe kuzalandirabe chithandizo pa chipatala pano mtsogolo.  
47  
48

### 49 50 **Kusiysidwa kutenga nawo mbali mu kafukufuku ndi wakafukufuku**

51 Anthu opangitsa kafukufukuyu akhonza kukuletsani kutenga nawo mbali mukafukufukuyu akaona kuti  
52 ndi bwino kuti mutero. Anthu akafukufukuwa azapanga chiganizochi ndikukudziwitsani kuti sizitheka  
53 kuti mupitirize. Chiganizochi chitha kupangidwa kuti ateteze thanzi ndi chitetezo chanu.  
54  
55  
56  
57  
58  
59  
60

**Kusiyitsidwa kutenga nawo mbali mu kafukufuku ndi wakafukufuku**

Anthu opangitsa kafukufukuyu akhonza kukuletsani kutenga nawo mbali mukafukufukuyu akaona kuti ndi bwino kuti mutero. Anthu akafukufukuwa azapanga chiganizochi ndikukudziwitsani kuti sizitheka kuti mupitirize. Chiganizochi chitha kupangidwa kuti ateteze thanzi ndi chitetezo chanu.

Investigator:

Khumbo Phiri  
Mobile: +265999840946  
Partners in Hope Clinic  
Area 36, Plot8  
M1 Road South  
Lilongwe, Malawi

OR

Dr.C. Mitambo  
The Secretariate, NHSRC  
Ministry of Health  
P.O Box 30377  
Lilongwe 3  
Cell +265888344 443

Wotenga mbali kapena omuyimira asayine

*Ndawerenga (kapena munthu wina wandiwerengera) zonse zalembedwa mwambamu. Ndapatsidwa mwayi wofunsa mafunso ndi mafunso onse ndinafunsa ayankhidwa ndipo ndakhutitsidwa. Ndapatsidwa pepala lina langati lomweyi.*

\_\_\_\_\_

Dzina la otenga mbali

\_\_\_\_\_

Dzina la oyimola malamulo

\_\_\_\_\_ Tsiku: \_\_\_\_\_

**Wotenga mbali kapena oyimira malamulo asayine**

**(Mutha kuyika X ngati simungathe kusayinila)**

**Ofufuza asayinire/Kapena othandizila Kafukufuku**

Ndafotokoza za kafukufuku uyu kwa otenga nawo mbali kapena owayimila, ndayankhanso mafunso awo onse. Ndikukhulupilira kuti amvetsetsa zomwe zananedwa mu chikalata ichi

1  
2  
3  
4  
5  
6  
7  
8  
9  
10  
11  
12  
13  
14  
15  
16  
17  
18  
19  
20  
21  
22  
23  
24  
25  
26  
27  
28  
29  
30  
31  
32  
33  
34  
35  
36  
37  
38  
39  
40  
41  
42  
43  
44  
45  
46  
47  
48  
49  
50  
51  
52  
53  
54  
55  
56  
57  
58  
59  
60

ndiponso avomereza mwakufuna kwawo kutenga nawo mbali.

\_\_\_\_\_

Dzina la ofufuza kapena othandizila kafukufuku

\_\_\_\_\_

Ofufuza kapena othandizila kafukufuku asayine apa      Tsiku

For peer review only

## 14.5. APPENDIX E: Baseline Survey – Male

### BASELINE SURVEY Identifying efficient linkage strategies for HIV self-testing (IDEaL) Male

| Question Name                  | Label                                                                                                                                                                                        | Responses                                                                                                                                                                                          |
|--------------------------------|----------------------------------------------------------------------------------------------------------------------------------------------------------------------------------------------|----------------------------------------------------------------------------------------------------------------------------------------------------------------------------------------------------|
| <b>INTRODUCTION SECTION</b>    |                                                                                                                                                                                              |                                                                                                                                                                                                    |
| interviewer                    | Full Name of Interviewer                                                                                                                                                                     |                                                                                                                                                                                                    |
| Interview date                 | Interview date                                                                                                                                                                               |                                                                                                                                                                                                    |
| Time start                     | Time survey started                                                                                                                                                                          |                                                                                                                                                                                                    |
| District                       | District                                                                                                                                                                                     |                                                                                                                                                                                                    |
| TA                             | TA                                                                                                                                                                                           |                                                                                                                                                                                                    |
| village                        | Village                                                                                                                                                                                      |                                                                                                                                                                                                    |
| <b>SECTION A: DEMOGRAPHICS</b> |                                                                                                                                                                                              |                                                                                                                                                                                                    |
| Intro Note                     | Thank you for agreeing to participate.<br>Now I will ask you a few questions about yourself and who you are.<br>Please feel free to answer honestly.<br>There are no right or wrong answers. |                                                                                                                                                                                                    |
| a7                             | What is your tribe?                                                                                                                                                                          | <ol style="list-style-type: none"> <li>1. Lomwe</li> <li>2. Sena</li> <li>3. Chewa</li> <li>4. Mang'anja/Nyanja</li> <li>5. Ngoni</li> <li>6. Tumbuka</li> <li>7. Tonga</li> <li>8. Yao</li> </ol> |



|      |                                                                                                 |                                                                                                                         |
|------|-------------------------------------------------------------------------------------------------|-------------------------------------------------------------------------------------------------------------------------|
|      |                                                                                                 | 99. Other, specify                                                                                                      |
| a3   | What is the highest level of school you attended?                                               | 1. Primary<br>2. Secondary<br>3. Higher                                                                                 |
| a3b  | What class did you complete in your highest level of school?                                    | _____                                                                                                                   |
| a4   | Please think of the past 12 months, how would you describe your primary occupation?             | 1. Working formally (employed full time)<br>2. Working informally (ganyu, farming, business)<br>3. Not working          |
| a5   | Are you currently married?                                                                      | 1. Married<br>2. Live-in partner<br>3. Steady Girlfriend/Boyfriend<br>4. Separated<br>5. Divorced<br>99. Other, specify |
| a6   | How many living children do you have?                                                           | _____                                                                                                                   |
| a6b  | What is the age of your <u>youngest</u> child?                                                  | _____                                                                                                                   |
| a6bc | What age is the child (in years or months)                                                      | _____                                                                                                                   |
| a4b  | How many children currently live with you?                                                      | _____                                                                                                                   |
| a7   | How many sexual partners have you had in the past 12 months?                                    | _____                                                                                                                   |
| a8   | Have you had sex with someone besides your wife/husband without a condom in the past 12 months? | 1. Yes<br>0. No<br>88. Don't know/ Not sure<br>89. Refused to answer                                                    |

|                                    |                                                                                                                                                                                                                             |                                                                                                                |
|------------------------------------|-----------------------------------------------------------------------------------------------------------------------------------------------------------------------------------------------------------------------------|----------------------------------------------------------------------------------------------------------------|
| a8b                                | Have you had sex without a condom in the past 12 months?                                                                                                                                                                    | 1. Yes<br>0. No<br>88. Don't know/ Not sure<br>89. Refused to answer                                           |
| <b>SECTION B: INCOME QUESTIONS</b> |                                                                                                                                                                                                                             |                                                                                                                |
| Intro Note                         | I will now discuss with you about the valuable items that you or your household possesses. As I will be chatting with you I will also some questions about money you have and activities that you indulge in to find money. |                                                                                                                |
| b1                                 | Please think of the past 12 months, how would you describe your primary occupation?                                                                                                                                         | 1. Working formally (employed full time)<br>2. Working informally (ganyu, farming, business)<br>3. Not working |
| b1b                                | Think about all the work you have done in the past month. How many days did you normally work this month that gave you pay?                                                                                                 | _____                                                                                                          |
| b2                                 | Do you have any savings for the future, such as a bank account, savings group or cash?                                                                                                                                      | 1. Yes<br>0. No                                                                                                |
| <b>Household Assets</b>            |                                                                                                                                                                                                                             |                                                                                                                |
| b3                                 | Does your household have:<br><i>The respondent said that his/her household doesn't have any of the household assets. Please probe and ensure that this is correct before you proceed.</i>                                   |                                                                                                                |
| b3_1                               | Metal Roof?                                                                                                                                                                                                                 | 1. Yes<br>0. No                                                                                                |
| b3_2                               | Electricity?                                                                                                                                                                                                                | 1. Yes                                                                                                         |

|       |                              |                 |
|-------|------------------------------|-----------------|
|       |                              | 0. No           |
| b3_3  | Paraffin lamp with no glass? | 1. Yes<br>0. No |
| b3_4  | A paraffin lamp?             | 1. Yes<br>0. No |
| b3_5  | A radio?                     | 1. Yes<br>0. No |
| b3_6  | A television?                | 1. Yes<br>0. No |
| b3_7  | A cellular phone?            | 1. Yes<br>0. No |
| b3_8  | A bed?                       | 1. Yes<br>0. No |
| b3_9  | A sofa set?                  | 1. Yes<br>0. No |
| b3_10 | A table?                     | 1. Yes<br>0. No |
| b3_11 | A refrigerator               | 1. Yes<br>0. No |
| b3_12 | Mattress?                    | 1. Yes<br>0. No |
| b3_13 | Chair(s)?                    | 1. Yes<br>0. No |
| b3_14 | Cattle?                      | 1. Yes<br>0. No |
| b3_15 | Goat?                        | 1. Yes<br>0. No |
| b3_16 | Sheep?                       | 1. Yes<br>0. No |
| b3_17 | Pigs?                        | 1. Yes<br>0. No |

|                     |                                                                                   |                                                                                                                                                                 |
|---------------------|-----------------------------------------------------------------------------------|-----------------------------------------------------------------------------------------------------------------------------------------------------------------|
| b3_18               | Donkey?                                                                           | 1. Yes<br>0. No                                                                                                                                                 |
| b3_19               | Chickens?                                                                         | 1. Yes<br>0. No                                                                                                                                                 |
| b3_20               | Other poultry?                                                                    | 1. Yes<br>0. No                                                                                                                                                 |
| b4                  | In the past 30 days, have you drank beer?                                         | 1. Yes<br>0. No                                                                                                                                                 |
| b4b                 | How many days in the past 30 days have you drank beer?                            | _____                                                                                                                                                           |
| b4c                 | How much money did you spend on beer the last time you went?                      | MWK:                                                                                                                                                            |
| b4d                 | In total, approximately how much money did you spend on beer in the past 30 days? | MWK:                                                                                                                                                            |
| <b>Relationship</b> |                                                                                   |                                                                                                                                                                 |
| Intro Note          | Now I'd like to talk to you about your current sexual relationship                |                                                                                                                                                                 |
| f8                  | How long have you been/were you in a sexual relationship with your partner?       | Days _____<br>Months _____<br>Years _____                                                                                                                       |
| f9                  | Do you have children with your partner? How many children?                        | _____                                                                                                                                                           |
| f10                 | How often do you currently talk to your partner?                                  | 1. Everyday<br>2. A couple times a week<br>3. Once a week<br>4. A couple times a month<br>5. Once a month<br>6. Less than once a month<br>7. Not at all (never) |
| f10b                | In a typical month, who earns more money? You, or your partner?                   | 1. Myself<br>2. This partner<br>3. We earn the same amount<br><br>88. Don't know                                                                                |

| Decision Making |                                                                                 |                                                                                                                                                                                    |
|-----------------|---------------------------------------------------------------------------------|------------------------------------------------------------------------------------------------------------------------------------------------------------------------------------|
| Intro Note      | Now I would like to talk to you about how you and your partner make decisions.  |                                                                                                                                                                                    |
| f11             | Who usually decides how the money you earn will be used?                        | 1. Yourself (Respondent)<br>2. Jointly (This partner and you together)<br>3. Mainly this partner<br>4. Someone else<br>5. Do not earn money<br>88. Refuse to say                   |
| f11b            | (if above question=4 ) Who decides?                                             | _____                                                                                                                                                                              |
| f12             | Who usually decides how your partner's earnings will be used?                   | 1. Yourself (Respondent)<br>2. Jointly (This partner and you together)<br>3. Mainly this partner<br>4. Someone else<br>5. Do not earn money<br>88. Refuse to say                   |
| f12b            | (if above question=4 ) Who decides?                                             | _____                                                                                                                                                                              |
| f13             | Who usually makes decisions about health care for yourself?                     | 1. Yourself (Respondent)<br>2. Jointly (This partner and you together)<br>3. Mainly this partner<br>4. Someone else<br>5. Not applicable/ Don't have children<br>88. Refuse to say |
| f13b            | (if above question=4 ) Who decides?                                             | _____                                                                                                                                                                              |
| f14             | Who usually makes decisions about health care for your child with this partner? | 1. Yourself (Respondent)<br>2. Jointly (This partner and you together)<br>3. Mainly this partner<br>4. Someone else                                                                |

|      |                                                                                                                                                                                                                                                                                                                                                                                                                                                                                                                                          |                                                                                                                                                                                                               |
|------|------------------------------------------------------------------------------------------------------------------------------------------------------------------------------------------------------------------------------------------------------------------------------------------------------------------------------------------------------------------------------------------------------------------------------------------------------------------------------------------------------------------------------------------|---------------------------------------------------------------------------------------------------------------------------------------------------------------------------------------------------------------|
|      |                                                                                                                                                                                                                                                                                                                                                                                                                                                                                                                                          | <p>5. Not applicable/ Don't have children</p> <p>88. Refuse to say</p>                                                                                                                                        |
| f14b | (if above question=4 ) Who decides?                                                                                                                                                                                                                                                                                                                                                                                                                                                                                                      | _____                                                                                                                                                                                                         |
| f15  | Who usually makes decisions about health care for your partner?                                                                                                                                                                                                                                                                                                                                                                                                                                                                          | <p>1. Yourself (Respondent)</p> <p>2. Jointly (This partner and you together)</p> <p>3. Mainly this partner</p> <p>4. Someone else</p> <p>5. Not applicable/ Don't have children</p> <p>88. Refuse to say</p> |
| f15b | (if above question=4 ) Who decides?                                                                                                                                                                                                                                                                                                                                                                                                                                                                                                      | _____                                                                                                                                                                                                         |
| f16  | Who usually makes decisions about making major household purchases?                                                                                                                                                                                                                                                                                                                                                                                                                                                                      | <p>1. Yourself (Respondent)</p> <p>2. Jointly (This partner and you together)</p> <p>3. Mainly this partner</p> <p>4. Someone else</p> <p>5. Not applicable/ Don't have children</p> <p>88. Refuse to say</p> |
| f16b | (if above question=4 ) Who decides?                                                                                                                                                                                                                                                                                                                                                                                                                                                                                                      | _____                                                                                                                                                                                                         |
| Note | <p>I would like to ask you questions about [probability/chance/likelihood] that certain things will happen. There are ten beans in this cup. I will ask you to pick some of the beans and put them in the plate. The number of beans that you are going to put in the plate will reflect the probability that something will happen. One bean means there is very little chance that something will happen. If you do not put any bean in the plate it means you are certain that there is no likelihood that something will happen.</p> |                                                                                                                                                                                                               |

|          |                                                                                                                                                                                                                                                                                                                                                                                                                                                                                                                                                                                                                                                                          |                         |
|----------|--------------------------------------------------------------------------------------------------------------------------------------------------------------------------------------------------------------------------------------------------------------------------------------------------------------------------------------------------------------------------------------------------------------------------------------------------------------------------------------------------------------------------------------------------------------------------------------------------------------------------------------------------------------------------|-------------------------|
| note2    | <p>If you put additional beans in the plate it means the chance that something will happen will also increase. For example, if you put one or two beans in the plate, it means there is little chance that something will happen. Even though there is little chance but it can happen. If you put ten beans it means there is equal chance of something happening or not. If you put six beans it means the chance that something will happen is slightly greater than not happening. If you put all ten beans, it means you are certain that whatever the case something will really happen. There is no wrong or right answer I just want to know what you think.</p> |                         |
| note3    | <p>INTERVIEWER: Report for each question the NUMBER OF BEANS put in the PLATE. After each question, replace the beans on the table (unless otherwise noted).</p>                                                                                                                                                                                                                                                                                                                                                                                                                                                                                                         |                         |
| Practice |                                                                                                                                                                                                                                                                                                                                                                                                                                                                                                                                                                                                                                                                          |                         |
| pr1      | <p>Pick the number of beans that reflects how likely you think it is that:</p>                                                                                                                                                                                                                                                                                                                                                                                                                                                                                                                                                                                           | _____                   |
| pr1b     | <p>You will go to the market at least once within the next 2 days.</p>                                                                                                                                                                                                                                                                                                                                                                                                                                                                                                                                                                                                   | _____                   |
| pr1c     | <p>You will go to the market at least once within the next 2 weeks.</p>                                                                                                                                                                                                                                                                                                                                                                                                                                                                                                                                                                                                  | _____                   |
| Practice |                                                                                                                                                                                                                                                                                                                                                                                                                                                                                                                                                                                                                                                                          |                         |
| pr2      | <p>INTERVIEWER: Did Respondent add any beans between pr1b and pr1c?</p>                                                                                                                                                                                                                                                                                                                                                                                                                                                                                                                                                                                                  | <p>1. Yes<br/>0. No</p> |

|                                           |                                                                                                                                                                                                                                                                                                                                                                                                                               |                                                                                                                                                                                      |
|-------------------------------------------|-------------------------------------------------------------------------------------------------------------------------------------------------------------------------------------------------------------------------------------------------------------------------------------------------------------------------------------------------------------------------------------------------------------------------------|--------------------------------------------------------------------------------------------------------------------------------------------------------------------------------------|
| pr3                                       | <p>Remember, as time goes by, you may find more time to go to the market. Therefore, you should have added beans to the plate. Let me ask you again. Now, add beans in the plate so that the number of beans in the plate reflects how likely you think it is that you will go to the market at least once within 2 weeks.</p> <p>How likely you think it is that you will go to the market at least once within 2 weeks?</p> | _____                                                                                                                                                                                |
| f17                                       | Pick the number of beans that reflects how likely you think:                                                                                                                                                                                                                                                                                                                                                                  |                                                                                                                                                                                      |
| f17b                                      | You will still be married/with [partner one year from now.                                                                                                                                                                                                                                                                                                                                                                    | _____                                                                                                                                                                                |
| f17c                                      | You are currently infected with HIV/AIDS                                                                                                                                                                                                                                                                                                                                                                                      | _____                                                                                                                                                                                |
| f17d                                      | You will become infected with HIV/AIDS during the next 12 months                                                                                                                                                                                                                                                                                                                                                              | _____                                                                                                                                                                                |
| f17e                                      | You will become infected with HIV/AIDS during their lifetime                                                                                                                                                                                                                                                                                                                                                                  | _____                                                                                                                                                                                |
| f17c                                      | partner is infected with HIV/AIDS now.                                                                                                                                                                                                                                                                                                                                                                                        | _____                                                                                                                                                                                |
| f17d                                      | partner will become infected with HIV/AIDS during the next 12 months.                                                                                                                                                                                                                                                                                                                                                         | _____                                                                                                                                                                                |
| <b>SELF REPORTED HEALTH AND HAPPINESS</b> |                                                                                                                                                                                                                                                                                                                                                                                                                               |                                                                                                                                                                                      |
| Intro Note                                | Now I'd like to talk to you about how healthy and happy you feel.                                                                                                                                                                                                                                                                                                                                                             |                                                                                                                                                                                      |
| e1                                        | I am interested in your general level of well-being or satisfaction with life. How satisfied are you with your life, all things considered?                                                                                                                                                                                                                                                                                   | <ol style="list-style-type: none"> <li>1. Very satisfied</li> <li>2. Somewhat satisfied</li> <li>3. Neutral</li> <li>4. Somewhat unsatisfied</li> <li>5. Very unsatisfied</li> </ol> |



|                                   |                                                                                                                       |                                                                                                                                          |
|-----------------------------------|-----------------------------------------------------------------------------------------------------------------------|------------------------------------------------------------------------------------------------------------------------------------------|
| e2                                | Do you think that you are more, equally or less satisfied than other persons your age and sex living in your village? | <ol style="list-style-type: none"> <li>1. More satisfied</li> <li>2. Equally satisfied</li> <li>3. Less satisfied</li> </ol>             |
| e3                                | In general, would you say your health now is: very good, good, poor or very poor?                                     | <ol style="list-style-type: none"> <li>1. Very good</li> <li>2. Good</li> <li>3. Poor</li> <li>4. Very poor</li> </ol>                   |
| e4                                | How would you compare your health to other people of the same age and sex in your village?                            | <ol style="list-style-type: none"> <li>1. More healthy</li> <li>2. Equally healthy</li> <li>3. Less healthy</li> </ol>                   |
| e5                                | In the past month, how many days were you too sick to work/go to school/complete household chores?                    | _____                                                                                                                                    |
| <b>Happiness</b>                  |                                                                                                                       |                                                                                                                                          |
| e6                                | How true are the following statements for you in the last month?                                                      |                                                                                                                                          |
| e6_1                              | I have felt depressed                                                                                                 | <ol style="list-style-type: none"> <li>1. Strongly Agree</li> <li>2. Agree</li> <li>3. Disagree</li> <li>4. Strongly Disagree</li> </ol> |
| e6_2                              | I have felt life was not worth living                                                                                 | <ol style="list-style-type: none"> <li>1. Strongly Agree</li> <li>2. Agree</li> <li>3. Disagree</li> <li>4. Strongly Disagree</li> </ol> |
| e6_3                              | I have felt content.                                                                                                  | <ol style="list-style-type: none"> <li>1. Strongly Agree</li> <li>2. Agree</li> <li>3. Disagree</li> <li>4. Strongly Disagree</li> </ol> |
| e6_4                              | I have felt lonely                                                                                                    | <ol style="list-style-type: none"> <li>1. Strongly Agree</li> <li>2. Agree</li> <li>3. Disagree</li> <li>4. Strongly Disagree</li> </ol> |
| <b>GENDER EQUITABLE MEN SCALE</b> |                                                                                                                       |                                                                                                                                          |
| Note                              | Please tell me if you strongly agree, agree, disagree, or strongly disagree with the following statements:            |                                                                                                                                          |

|    |                                                                                                            |                                                                                                                                                                                      |
|----|------------------------------------------------------------------------------------------------------------|--------------------------------------------------------------------------------------------------------------------------------------------------------------------------------------|
| j1 | Woman's most important role is to take care of her home and cook (take care of home is about housekeeping) | <ol style="list-style-type: none"> <li>1. Strongly Agree</li> <li>2. Agree</li> <li>3. Unsure</li> <li>4. Disagree</li> <li>5. Strongly Disagree</li> </ol> <p>88. Refuse to say</p> |
| j2 | Men need sex more than women                                                                               | <ol style="list-style-type: none"> <li>1. Strongly Agree</li> <li>2. Agree</li> <li>3. Unsure</li> <li>4. Disagree</li> <li>5. Strongly Disagree</li> </ol> <p>88. Refuse to say</p> |
| j3 | Men don't talk about sex, they just do it.                                                                 | <ol style="list-style-type: none"> <li>1. Strongly Agree</li> <li>2. Agree</li> <li>3. Unsure</li> <li>4. Disagree</li> <li>5. Strongly Disagree</li> </ol> <p>88. Refuse to say</p> |
| j4 | There are times when a woman deserves to be beaten                                                         | <ol style="list-style-type: none"> <li>1. Strongly Agree</li> <li>2. Agree</li> <li>3. Unsure</li> <li>4. Disagree</li> <li>5. Strongly Disagree</li> </ol> <p>88. Refuse to say</p> |
| j5 | Changing diapers, giving kids a bath & feeding kids are mother's responsibility                            | <ol style="list-style-type: none"> <li>1. Strongly Agree</li> <li>2. Agree</li> <li>3. Unsure</li> <li>4. Disagree</li> <li>5. Strongly Disagree</li> </ol> <p>88. Refuse to say</p> |
| j6 | It is a woman's responsibility to avoid getting pregnant                                                   | <ol style="list-style-type: none"> <li>1. Strongly Agree</li> <li>2. Agree</li> <li>3. Unsure</li> <li>4. Disagree</li> <li>5. Strongly Disagree</li> </ol> <p>88. Refuse to say</p> |
| j7 | A man should have the final word about decisions in his home                                               | <ol style="list-style-type: none"> <li>1. Strongly Agree</li> <li>2. Agree</li> <li>3. Unsure</li> <li>4. Disagree</li> </ol>                                                        |

|      |                                                                            |                                                                                                        |
|------|----------------------------------------------------------------------------|--------------------------------------------------------------------------------------------------------|
|      |                                                                            | 5. Strongly Disagree<br>88. Refuse to say                                                              |
| j8   | Men are always ready to have sex                                           | 1. Strongly Agree<br>2. Agree<br>3. Unsure<br>4. Disagree<br>5. Strongly Disagree<br>88. Refuse to say |
| j9   | A woman should tolerate violence in order to keep her family together      | 1. Strongly Agree<br>2. Agree<br>3. Unsure<br>4. Disagree<br>5. Strongly Disagree<br>88. Refuse to say |
| j10a | I would be outraged if my wife asked me to use a condom.                   | 1. Strongly Agree<br>2. Agree<br>3. Unsure<br>4. Disagree<br>5. Strongly Disagree<br>88. Refuse to say |
| j10b | Men would be outraged if their wife asked them to use a condom             | 1. Strongly Agree<br>2. Agree<br>3. Unsure<br>4. Disagree<br>5. Strongly Disagree<br>88. Refuse to say |
| j11  | A man and a woman should decide together what type of contraceptive to use | 1. Strongly Agree<br>2. Agree<br>3. Unsure<br>4. Disagree<br>5. Strongly Disagree<br>88. Refuse to say |
| j12  | I would never have a homosexual friend                                     | 1. Strongly Agree<br>2. Agree<br>3. Unsure<br>4. Disagree<br>5. Strongly Disagree<br>88. Refuse to say |

|      |                                                                                       |                                                                                                                                                                                      |
|------|---------------------------------------------------------------------------------------|--------------------------------------------------------------------------------------------------------------------------------------------------------------------------------------|
| j13a | If someone insults me, I will defend my reputation, with force if I have to.          | <ol style="list-style-type: none"> <li>1. Strongly Agree</li> <li>2. Agree</li> <li>3. Unsure</li> <li>4. Disagree</li> <li>5. Strongly Disagree</li> </ol> <p>88. Refuse to say</p> |
| j13b | If someone insults a man, he should defend his reputation, with force if he has to    | <ol style="list-style-type: none"> <li>1. Strongly Agree</li> <li>2. Agree</li> <li>3. Unsure</li> <li>4. Disagree</li> <li>5. Strongly Disagree</li> </ol> <p>88. Refuse to say</p> |
| j14  | To be a man you need to be tough.                                                     | <ol style="list-style-type: none"> <li>1. Strongly Agree</li> <li>2. Agree</li> <li>3. Unsure</li> <li>4. Disagree</li> <li>5. Strongly Disagree</li> </ol> <p>88. Refuse to say</p> |
| j15  | Men should be embarrassed if unable to get an erection                                | <ol style="list-style-type: none"> <li>1. Strongly Agree</li> <li>2. Agree</li> <li>3. Unsure</li> <li>4. Disagree</li> <li>5. Strongly Disagree</li> </ol> <p>88. Refuse to say</p> |
| j16  | If a guy gets a woman pregnant, child is the responsibility of both the man and woman | <ol style="list-style-type: none"> <li>1. Strongly Agree</li> <li>2. Agree</li> <li>3. Unsure</li> <li>4. Disagree</li> <li>5. Strongly Disagree</li> </ol> <p>88. Refuse to say</p> |
| j17  | A man should know what his partner likes during sex                                   | <ol style="list-style-type: none"> <li>1. Strongly Agree</li> <li>2. Agree</li> <li>3. Unsure</li> <li>4. Disagree</li> <li>5. Strongly Disagree</li> </ol> <p>88. Refuse to say</p> |
| j18  | The participation of the father is important in raising children                      | <ol style="list-style-type: none"> <li>1. Strongly Agree</li> <li>2. Agree</li> <li>3. Unsure</li> <li>4. Disagree</li> </ol>                                                        |

|                     |                                                                                                                                                                                                                  |                                                                                                        |
|---------------------|------------------------------------------------------------------------------------------------------------------------------------------------------------------------------------------------------------------|--------------------------------------------------------------------------------------------------------|
|                     |                                                                                                                                                                                                                  | 5. Strongly Disagree<br>88. Refuse to say                                                              |
| j19                 | It's important for men to have friends to talk about their problems                                                                                                                                              | 1. Strongly Agree<br>2. Agree<br>3. Unsure<br>4. Disagree<br>5. Strongly Disagree<br>88. Refuse to say |
| j20                 | A couple should decide together if they want to have children.                                                                                                                                                   | 1. Strongly Agree<br>2. Agree<br>3. Unsure<br>4. Disagree<br>5. Strongly Disagree<br>88. Refuse to say |
| <b>STIGMA</b>       |                                                                                                                                                                                                                  |                                                                                                        |
| Note                | In this next section I'd like to discuss your thoughts about people living with HIV in your community. Please feel free to talk openly, there is no right or wrong answer. I am interested in your own thoughts. |                                                                                                        |
| i3                  | I would buy fresh vegetables from a shopkeeper or vendor if I knew that this person had HIV                                                                                                                      | 1. Strongly Agree<br>2. Agree<br>3. Neutral<br>4. Disagree<br>5. Strongly Disagree                     |
| i4                  | If a member of my family became sick with AIDS, I would be willing to care for her or him in our own household                                                                                                   | 1. Strongly Agree<br>2. Agree<br>3. Neutral<br>4. Disagree<br>5. Strongly Disagree                     |
| i5                  | In my opinion, if a female teacher has HIV but is not sick, she should be allowed to continue teaching in the school                                                                                             | 1. Strongly Agree<br>2. Agree<br>3. Neutral<br>4. Disagree<br>5. Strongly Disagree                     |
| <b>EXPECTATIONS</b> |                                                                                                                                                                                                                  |                                                                                                        |

|            |                                                                                                                                                                                                                                                                                                                                                                                                                                                                                                                                    |       |
|------------|------------------------------------------------------------------------------------------------------------------------------------------------------------------------------------------------------------------------------------------------------------------------------------------------------------------------------------------------------------------------------------------------------------------------------------------------------------------------------------------------------------------------------------|-------|
| Intro Note | I would like to ask you questions about [probability/chance/likelihood] that certain things will happen. There are ten beans in this cup. I will ask you to pick some of the beans and put them in the plate. The number of beans that you are going to put in the place will reflect the probability that something will happen. One beans means there is very little chance that something will happen. If you do not put any bean in the plate it means you are certain that there is no likelihood that something will happen. |       |
| h4         | Pick the number of beans that reflects how likely you think it is that:                                                                                                                                                                                                                                                                                                                                                                                                                                                            | _____ |
| h4b        | You will have to rely on family members for financial assistance in the next 12 months.                                                                                                                                                                                                                                                                                                                                                                                                                                            | _____ |
| h4c        | You will have to provide some family members with financial assistance in the next 12 months.                                                                                                                                                                                                                                                                                                                                                                                                                                      | _____ |
| Note       | Next, I would like to ask you a few questions about what you expect in the future. I know that nobody knows for sure what the future may bring, but let's just talk about your best guess.                                                                                                                                                                                                                                                                                                                                         |       |
| h5         | In the next year how likely is it that you will:                                                                                                                                                                                                                                                                                                                                                                                                                                                                                   |       |
| h5a        | You will be enrolled in school one year from now                                                                                                                                                                                                                                                                                                                                                                                                                                                                                   | _____ |
| h5b        | Start a new business?                                                                                                                                                                                                                                                                                                                                                                                                                                                                                                              | _____ |
| h5c        | Open a bank account?                                                                                                                                                                                                                                                                                                                                                                                                                                                                                                               | _____ |
| h5d        | Buy land?                                                                                                                                                                                                                                                                                                                                                                                                                                                                                                                          | _____ |

|                     |                                                                                                                                                                               |                                                                                        |
|---------------------|-------------------------------------------------------------------------------------------------------------------------------------------------------------------------------|----------------------------------------------------------------------------------------|
| h5e                 | Save money?                                                                                                                                                                   | _____                                                                                  |
| h5f                 | Experience shortage of food?                                                                                                                                                  | _____                                                                                  |
| h5g                 | Have steady work?                                                                                                                                                             | _____                                                                                  |
| Tested for HIV      |                                                                                                                                                                               |                                                                                        |
| pd2                 | Approximately how many times have you ever been tested for HIV?<br><i>Enter "-99" if client doesn't remember</i>                                                              | _____                                                                                  |
| pd3                 | When was the last time you were tested for HIV?                                                                                                                               | a. Year _____<br>b. Month _____                                                        |
| pd5                 | Think about the very first time you received an HIV+ test result. Since that very first HIV+ test result, have you ever tested for HIV again (excluding a confirmatory test)? | 1. Yes<br>0. No                                                                        |
| pd6                 | Have you ever initiated ART?                                                                                                                                                  | 1. Yes<br>0. No                                                                        |
| First Initiated ART |                                                                                                                                                                               |                                                                                        |
| pd6b                | When did you first initiate ART?                                                                                                                                              | a. Year _____<br>b. Month _____                                                        |
| pd7                 | Have you ever been >14 days late for an ART appointment?                                                                                                                      | 1. Yes<br>0. No                                                                        |
| pd7b                | How many times?                                                                                                                                                               | _____                                                                                  |
| pd8                 | Do you know anyone who is on ART?                                                                                                                                             | 1. Yes<br>0. No                                                                        |
| pd8b                | Now think about the person on ART who you are closest with.<br><br>How often do you talk with them                                                                            | 1. Everyday<br>2. A couple times a week<br>3. Once a week<br>4. A couple times a month |

|       |                                                                        |                                                                                                                                                                                                                                                                                                                                                    |
|-------|------------------------------------------------------------------------|----------------------------------------------------------------------------------------------------------------------------------------------------------------------------------------------------------------------------------------------------------------------------------------------------------------------------------------------------|
|       | about ART?                                                             | <ol style="list-style-type: none"> <li>5. Once a month</li> <li>6. Less than once a month</li> <li>7. Not at all (never)</li> </ol>                                                                                                                                                                                                                |
| pd9   | Have you disclosed your HIV status to anyone besides your partner?     | <ol style="list-style-type: none"> <li>1. Yes</li> <li>0. No</li> </ol>                                                                                                                                                                                                                                                                            |
| pd9b  | <p>Who else did you disclose to?</p> <p><i>Mark all that apply</i></p> | <ol style="list-style-type: none"> <li>1. Sister</li> <li>2. Brother</li> <li>3. Father</li> <li>4. Mother</li> <li>5. Uncle</li> <li>6. Aunt</li> <li>7. Friend</li> <li>8. Mother-in-Law</li> <li>9. Father-in-Law</li> <li>10. My children</li> <li>11. Employee</li> <li>12. Other sexual partner</li> <li>99. Other, specify _____</li> </ol> |
| pd10  | Of those people you disclosed to, who do you talk to most often?       | <ol style="list-style-type: none"> <li>1. Sister</li> <li>2. Brother</li> <li>3. Father</li> <li>4. Mother</li> <li>5. Uncle</li> <li>6. Aunt</li> <li>7. Friend</li> <li>8. Mother-in-Law</li> <li>9. Father-in-Law</li> <li>10. My children</li> <li>11. Employee</li> <li>12. Other sexual Partner</li> <li>99. Other, specify _____</li> </ol> |
| pd10c | How often do you talk to that person?                                  | <ol style="list-style-type: none"> <li>1. Everyday</li> <li>2. A couple times a week</li> <li>3. Once a week</li> <li>4. A couple times a month</li> <li>5. Once a month</li> <li>6. Less than once a month</li> <li>7. Not at all (never)</li> </ol>                                                                                              |



| PREVIOUS USE OF HEALTH SERVICES |                                                                                                                                                                                               |                                                                                                                                                                                                        |
|---------------------------------|-----------------------------------------------------------------------------------------------------------------------------------------------------------------------------------------------|--------------------------------------------------------------------------------------------------------------------------------------------------------------------------------------------------------|
| Intro Note                      | Now I'd like to talk to you about your experience with using health services at health facilities.                                                                                            |                                                                                                                                                                                                        |
| h1                              | Have you gone to a health facility in the past 12 months (either for yourself or someone else - AKA as a guardian)?                                                                           | 1. Yes<br>0. No                                                                                                                                                                                        |
| h2                              | How many times have you gone to the health facility in the past 12 months?                                                                                                                    | _____                                                                                                                                                                                                  |
| h3                              | Now think about yourself specifically. How many times have you gone to a health facility in the past 12 months for your own health care?                                                      | _____                                                                                                                                                                                                  |
| h_a1                            | When was the last time (the YEAR) you went to a health facility for YOUR OWN health?<br><br>NOTE: PUT WHAT YEAR. (i.e., 2015). If DO NOT REMEMBER, help them estimate. IF NEVER GONE, put -99 | _____                                                                                                                                                                                                  |
| h4                              | What services did you receive at your <u>last</u> health facility visit for your own health?                                                                                                  | 1. ANC<br>2. Family Planning<br>3. Delivery<br>4. Post-natal<br>5. Under Five<br>6. HTC<br>7. ART<br>8. Feeling sick (OPD)<br>9. Injury (OPD)<br>10. Dentist<br>11. None<br><br>99. Other specify_____ |
| h_a2                            | Now think about the SECOND most recent time you went to a health facility for YOUR OWN health. What year did you go to the health facility?                                                   | _____                                                                                                                                                                                                  |
| c3                              | Now please think about your MOST RECENT visit to a health facility, excluding today. When did you go?                                                                                         | a. Year _____<br>b. Month _____                                                                                                                                                                        |

|     |                                                                |                                                                                                                                                                                                     |
|-----|----------------------------------------------------------------|-----------------------------------------------------------------------------------------------------------------------------------------------------------------------------------------------------|
| c4  | Which facility did you go to?                                  | 1. Current facility<br>0. Other facility, specify _____                                                                                                                                             |
| c5  | What was the main service you went for?                        | 1. ANC<br>2. Family Planning<br>3. Delivery<br>4. Post-natal<br>5. Under Five<br>6. HTC<br>7. ART<br>8. Feeling sick (OPD)<br>9. Injury (OPD)<br>10. Dentist<br>11. None<br>99. Other specify _____ |
| c5b | Who received services?                                         | 1. Myself<br>2. My child<br>3. My partner<br>4. Another family member<br>5. A friend<br>99. Other, specify _____                                                                                    |
| c6a | Did you (or the person you came with) receive another service? | 1. Yes<br>0. No                                                                                                                                                                                     |
| c6  | What was the second service you went for?                      | 1. ANC<br>2. Family Planning<br>3. Delivery<br>4. Post-natal<br>5. Under Five<br>6. HTC<br>7. ART<br>8. Feeling sick (OPD)<br>9. Injury (OPD)<br>10. Dentist<br>11. None<br>99. Other specify _____ |
| c6b | Who received services?                                         | 1. Myself<br>2. My child<br>3. My partner<br>4. Another family member<br>5. A friend<br>99. Other, specify _____                                                                                    |

| Service Satisfaction |                                                                                                                                                                                                                                                                   |                                                                                   |
|----------------------|-------------------------------------------------------------------------------------------------------------------------------------------------------------------------------------------------------------------------------------------------------------------|-----------------------------------------------------------------------------------|
| c10                  | Now I would like to talk to you about your satisfaction with the services you received that day. Please tell me whether any of these were problems for you at the VISIT YOU ARE THINKING ABOUT NOW, and if so, whether they were major or minor problems for you. |                                                                                   |
| c10_1                | Time you waited to see a provider                                                                                                                                                                                                                                 | 1. Major<br>2. Minor<br><br>0. No-problem<br>88. Not applicable<br>89. Don't know |
| c10_2                | Ability to discuss problems or concerns about your pregnancy                                                                                                                                                                                                      | 1. Major<br>2. Minor<br><br>0. No-problem<br>88. Not applicable<br>89. Don't know |
| c10_3                | Amount of explanation you received about the problem or treatment                                                                                                                                                                                                 | 1. Major<br>2. Minor<br><br>0. No-problem<br>88. Not applicable<br>89. Don't know |
| c10_4                | Privacy from having others see the examination                                                                                                                                                                                                                    | 1. Major<br>2. Minor<br><br>0. No-problem<br>88. Not applicable<br>89. Don't know |
| c10_5                | Privacy from having others hear your consultation discussion                                                                                                                                                                                                      | 1. Major<br>2. Minor<br><br>0. No-problem<br>88. Not applicable<br>89. Don't know |
| c10_6                | Availability of medicines at this facility                                                                                                                                                                                                                        | 1. Major<br>2. Minor                                                              |

|              |                                                                                                                                                |                                                                                                                                                                                                                           |
|--------------|------------------------------------------------------------------------------------------------------------------------------------------------|---------------------------------------------------------------------------------------------------------------------------------------------------------------------------------------------------------------------------|
|              |                                                                                                                                                | <ul style="list-style-type: none"> <li>0. No-problem</li> <li>88. Not applicable</li> <li>89. Don't know</li> </ul>                                                                                                       |
| c10_7        | The hours of service at this facility, i.e., when they open and close                                                                          | <ul style="list-style-type: none"> <li>1. Major</li> <li>2. Minor</li> <li>0. No-problem</li> <li>88. Not applicable</li> <li>89. Don't know</li> </ul>                                                                   |
| c10_8        | The number of days services are available to you                                                                                               | <ul style="list-style-type: none"> <li>1. Major</li> <li>2. Minor</li> <li>0. No-problem</li> <li>88. Not applicable</li> <li>89. Don't know</li> </ul>                                                                   |
| c10_9        | The cleanliness of the facility                                                                                                                | <ul style="list-style-type: none"> <li>1. Major</li> <li>2. Minor</li> <li>0. No-problem</li> <li>88. Not applicable</li> <li>89. Don't know</li> </ul>                                                                   |
| c10_10       | How the staff treated you                                                                                                                      | <ul style="list-style-type: none"> <li>1. Major</li> <li>2. Minor</li> <li>0. No-problem</li> <li>88. Not applicable</li> <li>89. Don't know</li> </ul>                                                                   |
| c10_11       | Cost for services or treatments                                                                                                                | <ul style="list-style-type: none"> <li>1. Major</li> <li>2. Minor</li> <li>0. No-problem</li> <li>88. Not applicable</li> <li>89. Don't know</li> </ul>                                                                   |
| Satisfaction |                                                                                                                                                |                                                                                                                                                                                                                           |
| c11          | In general, which of the following statements best describes your opinion of the services you either received or were provided at the facility | <ul style="list-style-type: none"> <li>1. I am very satisfied with the services I received</li> <li>2. I am satisfied with the services I received</li> <li>3. I am not satisfied with the services I received</li> </ul> |

|                    |                                                                                                                         |                                                        |
|--------------------|-------------------------------------------------------------------------------------------------------------------------|--------------------------------------------------------|
|                    |                                                                                                                         | 4. I am very dissatisfied with the services I received |
| c12                | Did you recommend this health facility to a friend or family member?                                                    | 1. Yes<br>0. No                                        |
| Comment            | We have reached the end of the chat. Thank you for your time. Do you have anything else you would like to say?          |                                                        |
| End Note           | Thank the participant for their time and give them transport reimbursement, if they did not come for an ART appointment |                                                        |
| Comments           | Enumerator comments                                                                                                     |                                                        |
| End of the survey! |                                                                                                                         |                                                        |

**BASELINE SURVEY**  
**Identifying efficient linkage strategies for HIV self-testing (IDEaL)**  
 Male (Chichewa)

| Question Name           | Label                                                                                                                                                                                                 | Responses                                                                             |
|-------------------------|-------------------------------------------------------------------------------------------------------------------------------------------------------------------------------------------------------|---------------------------------------------------------------------------------------|
| INTRODUCTION SECTION    |                                                                                                                                                                                                       |                                                                                       |
| interviewer             | Full Name of Interviewer                                                                                                                                                                              |                                                                                       |
| Interview date          | Interview date                                                                                                                                                                                        |                                                                                       |
| Time start              | Time survey started                                                                                                                                                                                   |                                                                                       |
| District                | District                                                                                                                                                                                              |                                                                                       |
| Facility                | Facility                                                                                                                                                                                              |                                                                                       |
| ID                      | ID                                                                                                                                                                                                    |                                                                                       |
| SECTION A: DEMOGRAPHICS |                                                                                                                                                                                                       |                                                                                       |
| Intro Note              | Zikomo povomera kutenga nawo mbali. Pa nthawi ino ndikufunsani ma funso ochepa okhudza za inu komanso kuti ndinu ndani. Chonde khalani omasuka kuyankha moona. Palibe yankho lokhoza komanso lolakwa. |                                                                                       |
| a7                      | Ndinu mtundu wanji wa munthu?                                                                                                                                                                         | 9. Lomwe<br>10. Sena<br>11. Chewa<br>12. Mang'anja/Nyanja<br>13. Ngoni<br>14. Tumbuka |

|      |                                                                                                                             |                                                                                                                             |
|------|-----------------------------------------------------------------------------------------------------------------------------|-----------------------------------------------------------------------------------------------------------------------------|
|      |                                                                                                                             | 15. Tonga<br>16. Yao<br>99. Other, specify                                                                                  |
| a3   | Kodi maphunziro anu mudapita nawo patali bwanji?                                                                            | 1. Pulayimale<br>2. Sekondale<br>3. Koleji                                                                                  |
| a3b  | Ndi kalasi liti munamaliza ya maphunziro anu apamwamba?                                                                     | _____                                                                                                                       |
| a4   | Chonde ganizani za masabata khumi ndi awiri apitawa, mungafotokoze bwanji za ntchito yomwe mumagwira?                       | 1. Ntchito yokhazikika (ya nthawi yayitali)<br>2. Ntchito yosakhazikika (ganyu, ulimi, bizinesi)<br>3. Sindikugwira ntchito |
| a5   | Kodi pakadali pano muli pa banja?                                                                                           | 1. Pa banja<br>2. Kukhala limodzi ngati banja<br>3. Chibwezi Chokhazikika<br>4. Tinasiyana<br>5. Banja linatha<br>99. Zina  |
| a6   | Muli ndi ana angati amoyo?                                                                                                  | _____                                                                                                                       |
| a6b  | Mwana wanu wang'ono ali ndi zaka zingati?                                                                                   | _____                                                                                                                       |
| a6bc | Mwana wanu wang'ono ali ndi zaka zingati?                                                                                   | _____                                                                                                                       |
| a4b  | Pakadali pano ana omwe mumakhala nawo ndi angati?                                                                           | _____                                                                                                                       |
| a7   | Pa miyezi khumi ndi iwiri yapitayi mwakhala ndi abwenzi ogonana nawo angati?                                                | _____                                                                                                                       |
| a8   | Mwakhlapo ndi bwenzi logonana kupatula akazi anu? amuna anu osagwiritsa ntchito kondomu mu miyezi khumi ndi awiri yapitayi? | 1. Eya<br>2. Ayi<br>88. Sindikudziwa<br>89. Akana kuyankha                                                                  |

|                                    |                                                                                                                                                                                                         |                                                                                                                                      |
|------------------------------------|---------------------------------------------------------------------------------------------------------------------------------------------------------------------------------------------------------|--------------------------------------------------------------------------------------------------------------------------------------|
| a8b                                | Mwagonanapo ndi munthu osagwiritsa ntchito kondomu mu miyezi khumi ndi awiri yapitayi?                                                                                                                  | <ol style="list-style-type: none"> <li>1. Eya</li> <li>2. Ayi</li> <li>88. Sindikudziwa</li> <li>89. Akana kuyankha</li> </ol>       |
| <b>SECTION B: INCOME QUESTIONS</b> |                                                                                                                                                                                                         |                                                                                                                                      |
| Intro Note                         | Pa nthawi ino ndikufunsani za zipangizo zomwe inu komanso apabanja panu alinazo. Mkati mwakucheza kwathu ndikufunsaninso za ndalama zomwe mulinazo komanso komanso zomwe mumachita kuti mupeze ndalama. |                                                                                                                                      |
| b1                                 | Chonde ganizirani za miyezi Khumi ndi iwiri yapitayi, mungafotokoze bwanji za ntchito yomwe mumagwira?                                                                                                  | <ol style="list-style-type: none"> <li>4. Ntchito yokhazikika</li> <li>5. Ganyu/bisinesi</li> <li>6. Sindikugwira ntchito</li> </ol> |
| b1b                                | Ganizani za ntchito zonse mwagwira mwezi watha. Mwagwira masiku angati olipidwa?                                                                                                                        | _____                                                                                                                                |
| b2                                 | Muli ndi ndalama zilizonse zomwe mukusungira za mtsogolo monga, ku banki, gulu losugira ndalama kapena ndalama zosunga kunyumba?                                                                        | <ol style="list-style-type: none"> <li>2. Eya</li> <li>3. Ayi</li> </ol>                                                             |
| <b>Household Assets</b>            |                                                                                                                                                                                                         |                                                                                                                                      |
| b3                                 | Does your household have:<br><i>The respondent said that his/her household doesn't have any of the household assets. Please probe and ensure that this is correct before you proceed.</i>               |                                                                                                                                      |
| b3_1                               | Denga la malata?                                                                                                                                                                                        | <ol style="list-style-type: none"> <li>1. Eya</li> <li>2. Ayi</li> </ol>                                                             |
| b3_2                               | Magetsi ?                                                                                                                                                                                               | <ol style="list-style-type: none"> <li>1. Eya</li> <li>2. Ayi</li> </ol>                                                             |
| b3_3                               | Koloboyi?                                                                                                                                                                                               | <ol style="list-style-type: none"> <li>1. Eya</li> <li>2. Ayi</li> </ol>                                                             |
| b3_4                               | Nyali?                                                                                                                                                                                                  | <ol style="list-style-type: none"> <li>1. Eya</li> <li>2. Ayi</li> </ol>                                                             |



|              |                                                                                |                  |
|--------------|--------------------------------------------------------------------------------|------------------|
| b3_5         | Wailesi?                                                                       | 1. Eya<br>2. Ayi |
| b3_6         | Kanema?                                                                        | 1. Eya<br>2. Ayi |
| b3_7         | Lamya ya M'manja?                                                              | 1. Eya<br>2. Ayi |
| b3_8         | Kama?                                                                          | 1. Eya<br>2. Ayi |
| b3_9         | Sofa?                                                                          | 1. Eya<br>2. Ayi |
| b3_10        | Tebulo?                                                                        | 1. Eya<br>2. Ayi |
| b3_11        | Filiji?                                                                        | 1. Eya<br>2. Ayi |
| b3_12        | Matilesi?                                                                      | 1. Eya<br>2. Ayi |
| b3_13        | Mipando                                                                        | 1. Eya<br>2. Ayi |
| b3_14        | Ng'ombe?                                                                       | 1. Eya<br>2. Ayi |
| b3_15        | Mbuzi?                                                                         | 1. Eya<br>2. Ayi |
| b3_16        | Nkhosa?                                                                        | 1. Eya<br>2. Ayi |
| b3_17        | Nkhumba?                                                                       | 1. Eya<br>2. Ayi |
| b3_18        | Bulu?                                                                          | 1. Eya<br>2. Ayi |
| b3_19        | Nkhuku?                                                                        | 1. Eya<br>2. Ayi |
| b3_20        | Zoweta zina                                                                    | 1. Eya<br>2. Ayi |
| b4           | Mu masiku makumi atatu apitawa mwamako mowa?                                   | 1. Eya<br>2. Ayi |
| b4b          | Pa masiku makumi atatu apitawa mwamwa mowa masiku angati?                      | _____            |
| b4c          | Mwataya ndalama zingati masiku omaliza omwe munapita ku mowa?                  | MWK:             |
| b4d          | Zonse pamodzi, mwataya ndalama zingati pa mowa mu masiku makumi atatu apitawa? | MWK:             |
| Relationship |                                                                                |                  |

|                        |                                                                                                     |                                                                                                                                                                  |
|------------------------|-----------------------------------------------------------------------------------------------------|------------------------------------------------------------------------------------------------------------------------------------------------------------------|
| Intro Note             | Panthawi ino ndikufunsani za abwezi ogonana nawo?                                                   |                                                                                                                                                                  |
| f8                     | Mwakhala pa ubwenzi ogonana ndi bwenzi lanu kwa nthawi yayitali bwanji?                             | Masiku _____<br>Miyezi _____<br>Zaka _____                                                                                                                       |
| f9                     | Muli ndi ana ndi bwenzi lanu logonana nalo? Ana angati?                                             | _____                                                                                                                                                            |
| f10                    | Mumayankhulana mowirikiza bwanji ndi bwenzi lanu pakadali pano?                                     | 1. Tsiku ndi tsiku<br>2. Masiku angapo pasabata<br>3. Kamodzi pa sabata<br>4. Kangapo pa mwezi<br>5. Kamodzi pa mwezi<br>6. Kosakwana mwezi<br>7. Sitiyankhulani |
| f10b                   | Pa mwezi amalandila ndalama zambiri ndi ndani? Inu kapena bwenzi lanu?                              | 1. Ine<br>2. Bwenzi langa<br>3. Timalandira ndalama zofanana<br>4. Sindikudziwa                                                                                  |
| <b>Decision Making</b> |                                                                                                     |                                                                                                                                                                  |
| Intro Note             | Pa nthawi ino ndikufunsani za momwe mumapangira maganizo ndi bwenzi lanu                            |                                                                                                                                                                  |
| f11                    | Nthawi zambiri ndi ndani amene amapanga chiganizo cha momwe ndalama mumapeze zigwiritsidwe ntchito? | 1. Ine<br>2. Timagwirizana<br>3. Nthawi zambiri bwenzi langa<br>4. Munthu wina<br>5. Sindipeza ndalama<br>88. Sindikufuna kuyankha                               |
| f11b                   | (Ngati yankho ndi 4) Amapanga chiganizo ndi ndani?                                                  | _____                                                                                                                                                            |
| f12                    | Amapanga chiganizo cha momwe ndalama za bwenzi lanu zigwiritsidwe ntchito ndi ndani?                | 1. Ine<br>2. Timagwirizana<br>3. Nthawi zambiri bwenzi langa<br>4. Munthu wina<br>5. Sindipeza ndalama                                                           |

|      |                                                                                                               |                                                                                                                                    |
|------|---------------------------------------------------------------------------------------------------------------|------------------------------------------------------------------------------------------------------------------------------------|
|      |                                                                                                               | 88. Sindikufuna kuyankha                                                                                                           |
| f12b | (Ngati yankho ndi 4)                                                                                          | _____                                                                                                                              |
| f13  | Nthawi zambiri amapanga chiganizo chokhudza thandizo la zaumoyo wanu ndi ndani?                               | 1. Ine<br>2. Timagwirizana<br>3. Nthawi zambiri bwenzi langa<br>4. Munthu wina<br>5. Sindipeza ndalama<br>88. Sindikufuna kuyankha |
| f13b | (Ngati yankho ndi 4) Amapanga chiganizo ndi ndani?                                                            | _____                                                                                                                              |
| f14  | Nthawi zambiri amapanga chiganizo cha thandizo la zaumoyo la mwana yemwe muli naye ndi bwenzi lanu ndi ndani? | 6. Ine<br>7. Mogwirizana<br>8. Nthawi zambiri bwenzi langa<br>9. Munthu wina<br>10. Ndilibe mwana<br>88. Sindikufuna kuyankha      |
| f14b | (if above question=4 ) Who decides?                                                                           | _____                                                                                                                              |
| f15  | Nthawi zambiri amapanga chiganizo chokhudza thandizo la zaumoyo la bwenzi lanu ndi ndani?                     | 1. Ine<br>2. Mogwirizana<br>3. Nthawi zambiri bwenzi langa<br>4. Munthu wina<br>5. Ndilibe ana<br>88.Sindikufuna kuyankha          |
| f15b | (Ngati yankho ndi 4) Amapanga chiganizo ndi ndani?                                                            | _____                                                                                                                              |
| f16  | Kodi amapanga ziganizo zogula katundu mkulumkulu wapakhomo panu ndi ndani?                                    | 1. Ine<br>2. Mogwirizana<br>3. Nthawi zambiri bwenzi langa                                                                         |

|       |                                                                                                                                                                                                                                                                                                                                                                                                                                                                                                                                                                                                                                                                                                                         |                                                                            |
|-------|-------------------------------------------------------------------------------------------------------------------------------------------------------------------------------------------------------------------------------------------------------------------------------------------------------------------------------------------------------------------------------------------------------------------------------------------------------------------------------------------------------------------------------------------------------------------------------------------------------------------------------------------------------------------------------------------------------------------------|----------------------------------------------------------------------------|
|       |                                                                                                                                                                                                                                                                                                                                                                                                                                                                                                                                                                                                                                                                                                                         | <p>4. Munthu wina</p> <p>5. Ndilibe ana</p> <p>88.Sindikufuna kuyankha</p> |
| f16b  | (Ngati yankho ndi 4) Amapanga chiganizo ndani?                                                                                                                                                                                                                                                                                                                                                                                                                                                                                                                                                                                                                                                                          |                                                                            |
| Note  | <p>Ndikufuna ndikufunseni zokhudzana za (Kuthekela/mwayi) kuti zinthu zina zichitike. Muli nyemba mu kapu. Ndikufunsani kuti musankhe zina mwa nyemba ndipo muyike mu mbale. Mulingo wa nyemba omwe muyike mu mbale udzafanizira kuti chinachake chichitika. Nyemba imodzi ikusonyeza kuti mwayi ndiochepa kuti chinachake chichitika. Ngati simuika nyemba mm' bale ndekuti mukutsimikiza kuti palibe mwayi oti chinachake chichitika</p>                                                                                                                                                                                                                                                                              |                                                                            |
| note2 | <p>Ngati muyike nyemba zowonjezera mu mbale, zikutanthauza kuti mwayi oti chinachake chichitika uchuluka, mwachitsanzo ngati muyika nyemba imodzi kapena ziwiri mwayi oti chinachake chichitika. Ngakhale pali mwayi ochepa koma chinachake chichitika. Ngati muyike nyemba nkhumu zikutanthauza kuti pali mwayi ofanana oti chinachake chichika kapena ayi. Ngati muyike nyemba zisanu ndi imodzi zikutanthauza kuti mwayi woti chinachake chichitika uli ochulukilapo kuposa mwayi oti chinachake sichichitika. Ngati muyike nyemba zonse khumi ndekuti muli ndi chikhulupiliro chonse kuti chinachake chichitikadi pavute pasavute. Palibe yankho lokhonza kapena lolakwa ndikungofuna kudziwa zomwe mukuganiza.</p> |                                                                            |

|          |                                                                                                                                                                                                                                          |                  |
|----------|------------------------------------------------------------------------------------------------------------------------------------------------------------------------------------------------------------------------------------------|------------------|
| note3    | Ofunsa: Pelekani yankho lanu pa funso lililonse nambala ya nyemba zomwe lili m'bale. Pakutha pa funso lililonse, bwezeletsani nyemba pa tebulo.                                                                                          |                  |
| Practice |                                                                                                                                                                                                                                          |                  |
| pr1      | Sankhani mulingo wa nyemba omwe ukhale ndi kuthekela kumene mukuganiza kuti:                                                                                                                                                             | _____            |
| pr1b     | Mupita ku msika mosachepera kamodzi m'masiku awiri akudzawa                                                                                                                                                                              | _____            |
| pr1c     | Mupita ku msika mosachepera kamodzi m'masabata awiri akudzawa.                                                                                                                                                                           | _____            |
| Practice |                                                                                                                                                                                                                                          |                  |
| pr2      | Ofunsa: kodi oyankha anawonjezera nyamba pakati pa pr1b ndi pr1c                                                                                                                                                                         | 2. Eya<br>0. Ayi |
| pr3      | Kumbukurani kuti pamene nthawi ikupita muzipeza mpata wambiri opita kunsika. Choncho, munayenela kuti mwaika nyemba zambiri m'bale<br><br>Kodi mukuganiza kuti kumsika mupita mosachepela kamodzi bwanji mu nyengo ya ma sabata awiriwa? | _____            |
| f17      | Sankhani mlingo wa nyemba umene ufanizile kaganidwe kanu:                                                                                                                                                                                |                  |
| f17b     | Mukhalabe mukanali pa banja/ndi (bwenzi oposela chaka chimodzi kuchoka pano                                                                                                                                                              | _____            |
| f17c     | Mudzadwala mu miyezi khumi ndi iwiri ikubwelayi                                                                                                                                                                                          | _____            |
| f17d     | Mudzayamba kumwa ma ARV mu miyezi itatu ikubwelayi                                                                                                                                                                                       | _____            |

|                                           |                                                                                                                                                                 |                                                                                                                                                                                                                |
|-------------------------------------------|-----------------------------------------------------------------------------------------------------------------------------------------------------------------|----------------------------------------------------------------------------------------------------------------------------------------------------------------------------------------------------------------|
| f17e                                      | Mudzadziwitsa achibale ndi anzanu za zotsatira zanu za HIV m'miyezi itatu ikubwelayi                                                                            | _____                                                                                                                                                                                                          |
| f17c                                      | Mukusafuna kwanu, anzanu ndi abale azadziwa kuti muli ndi HIV, mu miyezi itatu yapitayi.                                                                        | _____                                                                                                                                                                                                          |
| <b>SELF REPORTED HEALTH AND HAPPINESS</b> |                                                                                                                                                                 |                                                                                                                                                                                                                |
| Intro Note                                | Pa nthawi ino ndikufuna ndikambe nanu zokhudza umoyo ndi chisangalalo chanu.                                                                                    |                                                                                                                                                                                                                |
| e1                                        | Ndili ndi chidwi ndi mukudziwa za umoyo ndi kukhutitsidwa kwanu. Kodi muli okhutitsidwa bwanji ndi moyo wanu, pakutengela zonse.                                | <ol style="list-style-type: none"> <li>6. Okhutitsidwa kwamburi</li> <li>7. Okhutitsidwa pang'ono</li> <li>8. Pakatikati</li> <li>9. Okhutitsidwa pang'ono</li> <li>10. Osakhutitsidwa olo pang'ono</li> </ol> |
| e2                                        | Kodi mukuona ngati muli okhutitsidwa mofanana kapena osakhutitsidwa pang'ono mosaposela anthu ena a muna kapena akazi a msinkhu wanu ndi opezeka m'mudzi mwanu? | <ol style="list-style-type: none"> <li>1. Okhutitsidwa kwambiri</li> <li>2. Okhutitsidwa</li> <li>3. Okhutitsidwa pang'ono</li> </ol>                                                                          |
| e3                                        | Kutengela zonse, Kodi munganene kuti umoyo wanu tsopano uli bwino kwambiri, ulibwino, sulibwino, suli bwino olo pang'ono                                        | <ol style="list-style-type: none"> <li>1. Bwino kwambiri</li> <li>2. Bwino</li> <li>3. Silibwino</li> <li>4. Silibwino olo pang'ono</li> </ol>                                                                 |
| e4                                        | Kodi mungazifananzile bwanji za thanzi lanu ndi la anthu ena a msikhu ofanana ndi wanu, amuna kapena akazi a m'mudzi mwanu.                                     | <ol style="list-style-type: none"> <li>1. A thanzi kwambiri</li> <li>2. A thanzi</li> <li>3. Nthanzi lochepekela</li> </ol>                                                                                    |
| e5                                        | Kodi mwezi wathawu, ndi masiku angati omwe munadwara kwambiri ofika kukulepheretsani kugwira nthito/kupita ku sukulu/kugwira nthito za pa khomo                 | _____                                                                                                                                                                                                          |
| <b>Happiness</b>                          |                                                                                                                                                                 |                                                                                                                                                                                                                |
| e6                                        | Kodi ziganizo izi ndi zowona bwanji kwa inu?                                                                                                                    |                                                                                                                                                                                                                |
| e6_1                                      | Ndinali ndi nkhwana                                                                                                                                             | 1. Ndikugwirizana nazo kwambiri                                                                                                                                                                                |

|                                   |                                                                                                                                             |                                                                                                                                                                                                                                                                     |
|-----------------------------------|---------------------------------------------------------------------------------------------------------------------------------------------|---------------------------------------------------------------------------------------------------------------------------------------------------------------------------------------------------------------------------------------------------------------------|
|                                   |                                                                                                                                             | <ol style="list-style-type: none"> <li>2. Ndikugwirizana nazo</li> <li>3. Sindikugwirizana nazo</li> <li>4. Sindikugwirizana nazo kwambiri</li> </ol>                                                                                                               |
| e6_2                              | Ndimanva ngati moyo wafika                                                                                                                  | <ol style="list-style-type: none"> <li>1. Ndikugwirizana nazo kwambiri</li> <li>2. Ndikugwirizana nazo</li> <li>3. Sindikugwirizana nazo</li> <li>4. Sindikugwirizana nazo kwambiri</li> </ol>                                                                      |
| e6_3                              | Ndimanva kukhutitsidwa                                                                                                                      | <ol style="list-style-type: none"> <li>1. Ndikugwirizana nazo kwambiri</li> <li>2. Ndikugwirizana nazo</li> <li>3. Sindikugwirizana nazo</li> <li>4. Sindikugwirizana nazo kwambiri</li> </ol>                                                                      |
| e6_4                              | Ndimanva kusolidwa                                                                                                                          | <ol style="list-style-type: none"> <li>1. Ndikugwirizana nazo kwambiri</li> <li>2. Ndikugwirizana nazo</li> <li>3. Sindikugwirizana nazo</li> <li>4. Sindikugwirizana nazo kwambiri</li> </ol>                                                                      |
| <b>GENDER EQUITABLE MEN SCALE</b> |                                                                                                                                             |                                                                                                                                                                                                                                                                     |
| Note                              | Chonde ndiuzeni ngati mukugwirizana nazo kwabiri, mukugwirizana nazo, simukugwirizana nazo, simukugwirizana nazo olo pang'ono ziganizo izi: |                                                                                                                                                                                                                                                                     |
| j1                                | Udindo ofunikila wa mzimayi ndi kusamala khomo lake ndi kuphika.                                                                            | <ol style="list-style-type: none"> <li>1. Ndikugwirizana nazo kwambiri</li> <li>2. Ndikugwirizana nazo</li> <li>3. Sindikukhulupilira</li> <li>4. Sindikugwirizana nazo</li> <li>5. Sindikugwirizana nazo olo pang'ono</li> <li>88. Sindikufuna kuyankha</li> </ol> |
| j2                                | Abambo amafuna kugonana kuposa amayi                                                                                                        | <ol style="list-style-type: none"> <li>1. Ndikugwirizana nazo kwambiri</li> <li>2. Ndikugwirizana nazo</li> <li>3. Sindikukhulupilira</li> <li>4. Sindikugwirizana nazo</li> </ol>                                                                                  |

|    |                                                                          |                                                                                                                                                                                     |
|----|--------------------------------------------------------------------------|-------------------------------------------------------------------------------------------------------------------------------------------------------------------------------------|
|    |                                                                          | 5. Sindikugwirizana nazo olo pang'ono<br>88. Sindikufuna kuyankha                                                                                                                   |
| j3 | Azibambo sakonda kukambirana za kugonana amangochita                     | 1. Ndikugwirizana nazo kwambiri<br>2. Ndikugwirizana nazo<br>3. Sindikukhulupilira<br>4. Sindikugwirizana nazo<br>5. Sindikugwirizana nazo olo pang'ono<br>88. Sindikufuna kuyankha |
| j4 | Nthawi zina mzimayi amayenela kumenyedwa.                                | 1. Ndikugwirizana nazo kwambiri<br>2. Ndikugwirizana nazo<br>3. Sindikukhulupilira<br>4. Sindikugwirizana nazo<br>5. Sindikugwirizana nazo olo pang'ono<br>88. Sindikufuna kuyankha |
| j5 | Kusinta matewela, kusambitsa mwana, kudyetsa mwana ndi udindo wa mzimayi | 1. Ndikugwirizana nazo kwambiri<br>2. Ndikugwirizana nazo<br>3. Sindikukhulupilira<br>4. Sindikugwirizana nazo<br>5. Sindikugwirizana nazo olo pang'ono<br>88. Sindikufuna kuyankha |
| j6 | Ndi udindi wa mzimayi kupewa kutenga mimba.                              | 1. Ndikugwirizana nazo kwambiri<br>2. Ndikugwirizana nazo<br>3. Sindikukhulupilira<br>4. Sindikugwirizana nazo<br>5. Sindikugwirizana nazo olo pang'ono<br>88. Sindikufuna kuyankha |
| j7 | Mzibambo ayenela kukhala ndi chiganizo chomaliza cha mnyumba mwake.      | 1. Ndikugwirizana nazo kwambiri<br>2. Ndikugwirizana nazo<br>3. Sindikukhulupilira<br>4. Sindikugwirizana nazo                                                                      |



|      |                                                                                         |                                                                                                                                                                                                                |
|------|-----------------------------------------------------------------------------------------|----------------------------------------------------------------------------------------------------------------------------------------------------------------------------------------------------------------|
|      |                                                                                         | <p>5. Sindikugwirizana nazo olo pang'ono</p> <p>88. Sindikufuna kuyankha</p>                                                                                                                                   |
| j8   | Azibambo amakhala okonzeka ku gonana                                                    | <p>1. Ndikugwirizana nazo kwambiri</p> <p>2. Ndikugwirizana nazo</p> <p>3. Sindikukhulupilira</p> <p>4. Sindikugwirizana nazo</p> <p>5. Sindikugwirizana nazo olo pang'ono</p> <p>Sindikufuna kuyankha</p>     |
| j9   | Mzimayi akuyenela kulekelela nkhaza kuti asunge banja lake.                             | <p>1. Ndikugwirizana nazo kwambiri</p> <p>2. Ndikugwirizana nazo</p> <p>3. Sindikukhulupilira</p> <p>4. Sindikugwirizana nazo</p> <p>5. Sindikugwirizana nazo olo pang'ono</p> <p>Sindikufuna kuyankha</p>     |
| j10a | Ndikhoza kukwiya akaza anga atati andiuze kuti ndigwiritse ntchito kondumu.             | <p>1. Ndikugwirizana nazo kwambiri</p> <p>2. Ndikugwirizana nazo</p> <p>3. Sindikukhulupilira</p> <p>4. Sindikugwirizana nazo</p> <p>5. Sindikugwirizana nazo olo pang'ono</p> <p>88. Sindikufuna kuyankha</p> |
| j10b | Azibambo akhoza kukwiya akazi awo atawauza kuti agwiritse ntchito kondumu               | <p>1. Ndikugwirizana nazo kwambiri</p> <p>2. Ndikugwirizana nazo</p> <p>3. Sindikukhulupilira</p> <p>4. Sindikugwirizana nazo</p> <p>5. Sindikugwirizana nazo olo pang'ono</p> <p>88. Sindikufuna kuyankha</p> |
| j11  | Mzimayi komanso nzibambo agwirizane limodzi kuti agwiritse ntchito njira yanji yakulela | <p>1. Ndikugwirizana nazo kwambiri</p> <p>2. Ndikugwirizana nazo</p> <p>3. Sindikukhulupilira</p> <p>4. Sindikugwirizana nazo</p>                                                                              |

|      |                                                                                             |                                                                                                                                                                                                                                                                |
|------|---------------------------------------------------------------------------------------------|----------------------------------------------------------------------------------------------------------------------------------------------------------------------------------------------------------------------------------------------------------------|
|      |                                                                                             | 5. Sindikugwirizana nazo olo pang'ono<br>88. Sindikufuna kuyankha                                                                                                                                                                                              |
| j12  | Sindingakhale ndi nzanga wopanga zamathanyula                                               | 1. Ndikugwirizana nazo kwambiri<br>2. Ndikugwirizana nazo<br>3. Sindikukhulupilira<br>4. Sindikugwirizana nazo<br>5. Sindikugwirizana nazo olo pang'ono<br>88. Sindikufuna kuyankha                                                                            |
| j13a | Ngati munthu angandinyoze, ndiziteza pogwiritsa ntchito mphanvu, ngati ndikufunika kutero.  | 1. Ndikugwirizana nazo kwambiri<br>2. Ndikugwirizana nazo<br>3. Sindikukhulupilira<br>4. Sindikugwirizana nazo<br>5. Sindikugwirizana nazo olo pang'ono<br>88. Sindikufuna kuyankha                                                                            |
| j13b | Ngati munthu anganyoze mzibambo, aziteze pogwiritsa ntchito mphanvu ngati akufunika kutelo. | 1. Ndikugwirizana nazo kwambiri<br>2. Ndikugwirizana nazo<br>3. Sindikukhulupilira<br>4. Sindikugwirizana nazo<br>5. Sindikugwirizana nazo olo pang'ono<br>Sindikufuna kuyankha                                                                                |
| j14  | Kuti ukhale mzibambo ukufunika kukhala ovuta.                                               | 1. Ndikugwirizana nazo kwambiri<br>2. Ndikugwirizana nazo<br>3. Sindikukhulupilira<br>4. Sindikugwirizana nazo<br>5. Sindikugwirizana nazo olo pang'ono<br>Sindikufuna kuyankha<br>Sindikugwirizana nazo kwambiri<br>88. Refuse to say<br>Sindikufuna kuyankha |
| j15  | Azibambo akuyenela kunva manyazi ngati akukanika kutota                                     | 1. Ndikugwirizana nazo kwambiri<br>2. Ndikugwirizana nazo                                                                                                                                                                                                      |

|     |                                                                                     |                                                                                                                                                                                                                |
|-----|-------------------------------------------------------------------------------------|----------------------------------------------------------------------------------------------------------------------------------------------------------------------------------------------------------------|
|     |                                                                                     | <p>3. Sindikukhulupilira</p> <p>4. Sindikugwirizana nazo</p> <p>5. Sindikugwirizana nazo olo pang'ono</p> <p>88. Sindikufuna kuyankha</p>                                                                      |
| j16 | Ngati mzibambo wapeleka mimba kwa mzimayi, mwanayo ndi udindo wa anthu onse a wiri. | <p>1. Ndikugwirizana nazo kwambiri</p> <p>2. Ndikugwirizana nazo</p> <p>3. Sindikukhulupilira</p> <p>4. Sindikugwirizana nazo</p> <p>5. Sindikugwirizana nazo olo pang'ono</p> <p>88. Sindikufuna kuyankha</p> |
| j17 | Nzibambo akuyenela kudziwa zomwe bwenzi lake limakonda pogonana                     | <p>1. Ndikugwirizana nazo kwambiri</p> <p>2. Ndikugwirizana nazo</p> <p>3. Sindikukhulupilira</p> <p>4. Sindikugwirizana nazo</p> <p>5. Sindikugwirizana nazo olo pang'ono</p> <p>88. Sindikufuna kuyankha</p> |
| j18 | Kutenga nawo mbali kwa a bambo ndi kofunika polela mwana                            | <p>1. Ndikugwirizana nazo kwambiri</p> <p>2. Ndikugwirizana nazo</p> <p>3. Sindikukhulupilira</p> <p>4. Sindikugwirizana nazo</p> <p>5. Sindikugwirizana nazo olo pang'ono</p> <p>88. Sindikufuna kuyankha</p> |
| j19 | Ndi zofunika kuti abambo azikhala ndi anzawo okambilana nawo mavuto awo.            | <p>1. Ndikugwirizana nazo kwambiri</p> <p>2. Ndikugwirizana nazo</p> <p>3. Sindikukhulupilira</p> <p>4. Sindikugwirizana nazo</p> <p>5. Sindikugwirizana nazo olo pang'ono</p> <p>88. Sindikufuna kuyankha</p> |
| j20 | Banja lizigwirizana limodzi ngati likufuna kukhala ndi mwana                        | <p>1. Ndikugwirizana nazo kwambiri</p> <p>2. Ndikugwirizana nazo</p> <p>3. Sindikukhulupilira</p> <p>4. Sindikugwirizana nazo</p>                                                                              |

|                     |                                                                                                                                                                                                                                    |                                                                                                                                             |
|---------------------|------------------------------------------------------------------------------------------------------------------------------------------------------------------------------------------------------------------------------------|---------------------------------------------------------------------------------------------------------------------------------------------|
|                     |                                                                                                                                                                                                                                    | 5. Sindikugwirizana nazo olo pang'ono<br>88. Sindikufuna kuyankha                                                                           |
| <b>STIGMA</b>       |                                                                                                                                                                                                                                    |                                                                                                                                             |
| Note                | Mugawo lotsatila ndifuna tikambilane zokhudza maganizo anu a anthu omwe ali ndi HIV komanso akukhala mu dela lanu. Chonde khalani omasuka kuyankhula momasuka, palibe yankho lohoza kapena lolakwa. Ndikufuna ndinve maganizo anu. |                                                                                                                                             |
| i3                  | Ndikhoza kugula ndiwo zamasamba kwa munthu oti ndikudziwa kuti ali ndi HIV.                                                                                                                                                        | 1. Ndikugwirizana zano kwambiri<br>2. Ndikugwirizana nazo<br>3. Pakatikati<br>4. Sindikugwirizana nazo<br>5. Sindikugwirizana nazo kwambiri |
| i4                  | Ngati wachibale wanga angadwale AIDS, ndingavomele kumusamala pakhomo panga.                                                                                                                                                       | 1. Ndikugwirizana zano kwambiri<br>2. Ndikugwirizana nazo<br>3. Pakatikati<br>4. Sindikugwirizana nazo<br>5. Sindikugwirizana nazo kwambiri |
| i5                  | M'maganizo mwanga, ngati mphunzitsi wa mkazi ali ndi HIV koma sakudwala, aloledwe kupitiliza kuphunzitsa.                                                                                                                          | 1. Ndikugwirizana zano kwambiri<br>2. Ndikugwirizana nazo<br>3. Pakatikati<br>4. Sindikugwirizana nazo<br>5. Sindikugwirizana nazo kwambiri |
| <b>EXPECTATIONS</b> |                                                                                                                                                                                                                                    |                                                                                                                                             |

|            |                                                                                                                                                                                                                                                                                                                                                                                                                                    |       |
|------------|------------------------------------------------------------------------------------------------------------------------------------------------------------------------------------------------------------------------------------------------------------------------------------------------------------------------------------------------------------------------------------------------------------------------------------|-------|
| Intro Note | Ndikufuna ndikufunsemi zokhudzana za (Kuthekela/mwayi) kuti zinthu zina zichitike. Muli nyemba mu kapu. Ndikufunsemi kuti musankhe zina mwa nyemba ndipo muyike mu mbale. Mulingo wa nyemba omwe muyike mu mbale udzafanizira kuti chinachake chichitika. Nyemba imodzi ikusonyeza kuti mwayi ndiochepa kuti chinachake chichitika. Ngati simuika nyemba mm'bale ndekuti mukutsimikiza kuti palibe mwayi oti chinachake chichitika |       |
| h4         | Sankhani mulingo wa nyemba omwe ukhale ndi kuthekela kumene mukuganiza kuti:                                                                                                                                                                                                                                                                                                                                                       | _____ |
| h4b        | Mudzakhala mukudalila apabanja panu pa nkhani ya zachuma mu miyezi itatu ikubwelayi.                                                                                                                                                                                                                                                                                                                                               | _____ |
| h4c        | Mukhala mukuthandiza achibale ena pa nkhani za chuma miyezi itatu ikubweyi.                                                                                                                                                                                                                                                                                                                                                        | _____ |
| Note       | Kotsatira ndikufuna ndikufunsemi mafunse ochepa okhudza chiyembekezo chanu cha mtsogolo. Ndikudziwa palibe yemmwe amadziwa za mtsogolo koma tiyeni tikambe mongoyelezeka.                                                                                                                                                                                                                                                          |       |
| h5         | Mu chaka chamawa chiyembekezere choti mudzakhala mu:                                                                                                                                                                                                                                                                                                                                                                               |       |
| h5a        | Mudzakhala mutayamba sukulukuchoka lelo chaka chamawa                                                                                                                                                                                                                                                                                                                                                                              | _____ |
| h5b        | Kuyamba buzinesi                                                                                                                                                                                                                                                                                                                                                                                                                   | _____ |
| h5c        | Kutsegula akaunti ku banki                                                                                                                                                                                                                                                                                                                                                                                                         | _____ |
| h5d        | Ku gula malo?                                                                                                                                                                                                                                                                                                                                                                                                                      | _____ |

|                     |                                                                                                                                        |                                  |
|---------------------|----------------------------------------------------------------------------------------------------------------------------------------|----------------------------------|
| h5e                 | Kusunga ndalama?                                                                                                                       | _____                            |
| h5f                 | Kukhala ndi chakudya chochepa?                                                                                                         | _____                            |
| h5g                 | Kukhala pa ntchito yokhazikika                                                                                                         | _____                            |
| Tested for HIV      |                                                                                                                                        |                                  |
| pd2                 | Mwayezetsapo HIV kokwana kangati?<br><i>Enter "-99" if client doesn't remember</i>                                                     | _____                            |
| pd3                 | Komaliza munayezetsa HIV kanali liti?                                                                                                  | a) Chaka _____<br>b) Mwezi _____ |
| pd5                 | Ganizani za ulendo wanu ayamba olandira zotsatira zakuyezadwa kwa HIV. Koyamba kulandira zotsatira zoti akupezani ndi HIV kanali liti? | a) Chaka _____<br>b) Mwezi _____ |
| pd6                 | Have you ever initiated ART?<br>Munayamba mwamapo ma ARV?                                                                              | 2. Eya<br>0. Ayi                 |
| First Initiated ART |                                                                                                                                        |                                  |
| pd6b                | Koyamba kumwa ma ARV kanali liti?                                                                                                      | c. Chaka _____<br>d. Mwezi _____ |
| pd7                 | Munayamba mwachedwako kukatenga mwankhwala masiku ochepela khumi ndi folo?                                                             | 1. Eya<br>0. Ayi                 |
| pd7b                | Masiku angati?                                                                                                                         | _____                            |
| Pd7c                | Munasiya kumwa ma ARV chifukwa chani?                                                                                                  | _____<br>_____                   |
| pd8                 | Mukudziwa munthu wina aliyense                                                                                                         |                                  |

|      |                                                                                                               |                                                                                                                                                                                                                                                    |
|------|---------------------------------------------------------------------------------------------------------------|----------------------------------------------------------------------------------------------------------------------------------------------------------------------------------------------------------------------------------------------------|
|      | yenwe akumwa ma ARV?                                                                                          | 1. Eya<br>0. Ayi                                                                                                                                                                                                                                   |
| pd8b | Pano ganizani za munthu yemwe akumwa ma ARV amene mulinali pafupi<br><br>Mumayankhula naye mowilikiza bwanji? | 1. Siku ndi tsiku<br>2. Kangapo pa sabata<br>3. Kamodzi pa sabata<br>4. Kangapo pa sabata<br>5. Kamodzi kamwezi<br>6. Kochepera kamodzi pa mwezi<br>7. Sitiyankhulana                                                                              |
| pd9  | Munayamba mwaululapo za momwe nthupi mwanu mulili za HIV kwa anthu ena kupatura bwenzi lanu?                  | 1. Eya<br>1. Ayi                                                                                                                                                                                                                                   |
| pd9b | Wina munamuza anali ndani?<br><i>Mark all that apply</i>                                                      | 1. Ntchemwali<br>2. Ntchimwene<br>3. Bambo anga<br>4. Mayi anga<br>5. Malume<br>6. Azakhali anga<br>7. Nzanga<br>8. Apongozi akazi<br>9. Apongozi amuna<br>10. Ana anga<br>11. Ogwira naye ntchito<br>12. Bwezi logonanalo<br>13. Zina, fotokozani |
| pd10 | Pa munthu yemwe munamuwuzwa, ndi ndani yemwe mumayankhula naye kawirikawiri?                                  | 1. Ntchemwali<br>2. Ntchimwene<br>3. Bambo anga<br>4. Mayi anga<br>5. Malume<br>6. Azakhali anga<br>7. Nzanga<br>8. Apongozi akazi<br>9. Apongozi amuna<br>10. Ana anga<br>11. Ogwira naye ntchito<br>12. Bwezi logonanalo<br><br>Zina, fotokozani |

|                                        |                                                                                                                                                                                         |                                                                                                                                                                                                                                                                                                                      |
|----------------------------------------|-----------------------------------------------------------------------------------------------------------------------------------------------------------------------------------------|----------------------------------------------------------------------------------------------------------------------------------------------------------------------------------------------------------------------------------------------------------------------------------------------------------------------|
| pd10c                                  | Muntjuyi mumayankhula naye mowirikiza bwani?                                                                                                                                            | <ol style="list-style-type: none"> <li>1. Tsiku ndi tsiku</li> <li>2. Kangapo pa sabata</li> <li>3. Kamodzi pa sabata</li> <li>4. Kangapo pa mwezi</li> <li>5. Kamodzi pa mwezi</li> <li>6. Kochepera kamodzi pa mwezi</li> <li>7. Sitiyankhulana</li> </ol>                                                         |
| <b>PREVIOUS USE OF HEALTH SERVICES</b> |                                                                                                                                                                                         |                                                                                                                                                                                                                                                                                                                      |
| Intro Note                             | Pa ntahwi ino ndifuna tikambilane zokhudza za zomwe mwadutsamo pogwiritsa ntchito thandizo la za umoyo pa chipatala.                                                                    |                                                                                                                                                                                                                                                                                                                      |
| h1                                     | Munayamba mwapitako ku chipatala miyezi khumi ndi iwiri yapitayi.(chifukwa cha inu kapena kupelekeza munthu wina)?                                                                      | <ol style="list-style-type: none"> <li>1. Eya</li> <li>0. Ayi</li> </ol>                                                                                                                                                                                                                                             |
| h2                                     | Mwapita ku chipatala kangati miyezi khumi ndi iwiri yapitayi?                                                                                                                           | _____                                                                                                                                                                                                                                                                                                                |
| h3                                     | Pa nthawi ino ganizani za inu. Mwapita kangati ku chipatala miyezi khumi ndi awiri yapitayi panokha kukalandira thandizo la zaumoyo?                                                    | _____                                                                                                                                                                                                                                                                                                                |
| h_a1                                   | <p>Komaliza kupita kuchipatala(chaka) chifukwa mwadwala ndinu kanali liti?</p> <p>NOTE: PUT WHAT YEAR. (i.e., 2015). If DO NOT REMEMBER, help them estimate. IF NEVER GONE, put -99</p> | _____                                                                                                                                                                                                                                                                                                                |
| h4                                     | Munalandira thandizo lanji ulendo umaliza munapita kuchipatala?                                                                                                                         | <ol style="list-style-type: none"> <li>12. ANC</li> <li>13. Family Planning</li> <li>14. Delivery</li> <li>15. Post-natal</li> <li>16. Under Five<br/>Ku ana</li> <li>17. Kukayezetsa HIV</li> <li>18. ARV</li> <li>19. (OPD) Kudwala</li> <li>20. (OPD)Kuvulala</li> <li>21. Kukonana ndi dotolo wa manu</li> </ol> |



|      |                                                                                                                     |                                                                                                                                                                                                                  |
|------|---------------------------------------------------------------------------------------------------------------------|------------------------------------------------------------------------------------------------------------------------------------------------------------------------------------------------------------------|
|      |                                                                                                                     | 22. Palibe                                                                                                                                                                                                       |
| h_a2 | Tsopano ganizani za kachiwiri komwe munapita kuchipatala nokha cha posachedwapa. Munapita ku chiptala chaka chanji? | _____                                                                                                                                                                                                            |
| c3   | Chonde ganizani za ulendo wanu munapita kuchipatala chaposachedwa, kuphatikizapo lelo. Munapita lelo?               | c. Chaka _____<br>d. Mwezi _____<br>Mwezi                                                                                                                                                                        |
| c4   | Munapita ku chipatala chiti                                                                                         | 1. Chipatala chomwe mumapita pakali pano<br>2. Chipatala china, tchulani                                                                                                                                         |
| c5   | Munapita kukalandila thandizo lanji ku chipatala?                                                                   | 1. ANC<br>2. Family Planning<br>3. Delivery<br>4. Post-natal<br>5. Under Five<br>Ku ana<br>6. Kukayezetsa HIV<br>7. ARV<br>8. (OPD) Kudwala<br>9. (OPD)Kuvulala<br>10. Kukonana ndi dotolo wa manu<br>11. Palibe |
| c5b  | Amene analandira thandizo la zaumoyo anali ndani?                                                                   | 1. Ineyo<br>2. Mwana wanga<br>3. Bwenzi langa<br>4. Wapabanja panga<br>5. Mzanga<br>99. Zina, fotokozani _____                                                                                                   |
| c6a  | Inu kapena munthu yemwe munapita naye kuchipatala analandila munthu wina wathandizo la zaumoyo?                     | 2. Eya<br>0. Ayi                                                                                                                                                                                                 |
| c6   | Thandizo lachiwiri la zaumyo lomwe manalandira linali lanji?                                                        | 1. ANC<br>2. Family Planning<br>3. Delivery<br>4. Post-natal<br>5. Under Five<br>Ku ana<br>6. Kukayezetsa HIV<br>7. ARV<br>8. (OPD) Kudwala                                                                      |

|                      |                                                                                                                                                                                                                                                           |                                                                                                                           |
|----------------------|-----------------------------------------------------------------------------------------------------------------------------------------------------------------------------------------------------------------------------------------------------------|---------------------------------------------------------------------------------------------------------------------------|
|                      |                                                                                                                                                                                                                                                           | <p>9. (OPD)Kuvulala</p> <p>10. Kukonana ndi dotolo wa manu</p> <p>11. Palibe</p>                                          |
| c6b                  | Analandira thandizo la zaumoyo anali ndani?                                                                                                                                                                                                               | <p>1. Ine</p> <p>2. Mwana wanga</p> <p>3. Bwezi langa</p> <p>4. Wapabanja panga</p> <p>5. Nzanga Zina, fotokozani</p>     |
| Service Satisfaction |                                                                                                                                                                                                                                                           |                                                                                                                           |
| c10                  | Pa nthawi ino ndikufuna ndikufunsi za kukhutila kwanu ndi thandizo la zaumoyo munalandila pa tsikulo. Chinde nduuzeni ngai zina mwazotsatirazi zinli vito kwa inu patsiku lomwe munapita kuchipatala, ngati eya, ngati vutolo linali lalikulu kapena ayi. |                                                                                                                           |
| c10_1                | Nthawi yomwe mumafuna kuonana ndi dotolo                                                                                                                                                                                                                  | <p>1. Vuto kwambiri</p> <p>2. Vuto pang'ono</p> <p>3. Silinali vuto</p> <p>88. Not applicable</p> <p>98. Sindikudziwa</p> |
| c10_2                | Kuthekela kokambilana za mavuto anu a pakati.                                                                                                                                                                                                             | <p>1. Vuto kwambiri</p> <p>2. Vuto pang'ono</p> <p>0. Silinali vuto</p> <p>88. Not applicable</p> <p>98. Sindikudziwa</p> |
| c10_3                | Mulingo waku Kufotokozeledwa munalandira okhudza vuto lanu kapena thandizo.                                                                                                                                                                               | <p>1. Vuto kwambiri</p> <p>2. Vuto pang'ono</p> <p>0. Silinali vuto</p> <p>88. Not applicable</p> <p>98. Sindikudziwa</p> |
| c10_4                | Chinsinsi kuopetsa ena kuwona zotsatila za umoyo                                                                                                                                                                                                          | <p>1. Vuto kwambiri</p> <p>2. Vuto pang'ono</p> <p>0. Silinali vuto</p> <p>88. Not applicable</p> <p>98. Sindikudziwa</p> |

|        |                                                                                     |                                                                                                                        |
|--------|-------------------------------------------------------------------------------------|------------------------------------------------------------------------------------------------------------------------|
| c10_5  | Chinsinsi kuopa ena kunva za zokambilana zanu                                       | 1. Vuto kwambiri<br>2. Vuto pang'ono<br>0. Silinali vuto<br><br>88. Not applicable<br>98. Sindikudziwa                 |
| c10_6  | Kupezeka kwa mankwala mzipatala                                                     | 1. Vuto kwambiri<br>2. Vuto pang'ono<br>0. Silinali vuto<br><br>88. Not applicable<br>98. Sindikudziwa                 |
| c10_7  | Ma ola omwe thandizo limapelekedwa pa chipatala i.e thawi yotsegulila ndi yotsekela | 1. Vuto kwambiri<br>2. Vuto pang'ono<br>0. Silinali vuto<br><br>88. Not applicable<br>98. Sindikudziwa                 |
| c10_8  | Masiku omwe mumalandila thandizo                                                    | 1. Vuto kwambiri<br>2. Vuto pang'ono<br>0. Silinali vuto<br><br>88. Not applicable<br>98. Sindikudziwa<br>Sindikudziwa |
| c10_9  | Ukhondo wa pa chipatala                                                             | 1. Vuto kwambiri<br>2. Vuto pang'ono<br>0. Silinali vuto<br><br>88. Not applicable<br>98. Sindikudziwa                 |
| c10_10 | Momwe ogwira ntchito amakusamalilani                                                | 1. Vuto kwambiri<br>2. Vuto pang'ono<br>0. Silinali vuto<br><br>88. Not applicable<br>98. Sindikudziwa                 |
| c10_11 | Mtengo wa thandizo ndi mankwala                                                     | 1. Vuto kwambiri<br>2. Vuto pang'ono<br>1. Silinali vuto<br><br>88. Not applicable<br>98. Sindikudziwa                 |

| Satisfaction       |                                                                                                                         |                                                                                                                                                                                                                                                                                                     |
|--------------------|-------------------------------------------------------------------------------------------------------------------------|-----------------------------------------------------------------------------------------------------------------------------------------------------------------------------------------------------------------------------------------------------------------------------------------------------|
| c11                | Ndi chiganizo chiti chomwe chikufotokoza za maganizo anu okhudza thandizo lomwe munalandila pa chipatala?               | <ol style="list-style-type: none"> <li>1. Ndili okhutitsidwa kwabiri ndi thandizo ndinalandila.</li> <li>2. Ndili okhutitsidwa ndi thandizo ndinalandila.</li> <li>3. Sindili okhutitsidwa ndi thandizo ndinalandila</li> <li>4. Sindili okhutitsidwa kwambiri ndi thandizo ndinalandila</li> </ol> |
| c12                | Munatchulako za chipatalachi kwa nzanu kapena wachibale?                                                                | <ol style="list-style-type: none"> <li>2. Eya</li> <li>0. Ayi</li> </ol>                                                                                                                                                                                                                            |
| Comment            | Tafika pamapeto a kucheza kwathu. Zikomo chifukwa cha nthawi yanu. Pali chili chonse mukufuna kuwonjezera?              |                                                                                                                                                                                                                                                                                                     |
| End Note           | Thank the participant for their time and give them transport reimbursement, if they did not come for an ART appointment |                                                                                                                                                                                                                                                                                                     |
| Comments           | Enumerator comments                                                                                                     |                                                                                                                                                                                                                                                                                                     |
| End of the survey! |                                                                                                                         |                                                                                                                                                                                                                                                                                                     |

1  
2  
3 **14.6. APPENDIX F: Baseline survey – Female**  
4  
5

---

6  
7  
8 **BASELINE SURVEY**  
9 **Identifying efficient linkage strategies for HIV self-testing (IDEaL)**  
10 Female  
11

---

12  
13  
14  
15  
16  
17  
18  
19

| INTRODUCTION SECTION |                          |  |
|----------------------|--------------------------|--|
| interviewer          | Full Name of Interviewer |  |
| Interview date       | Interview date           |  |
|                      |                          |  |
| Time start           | Time survey started      |  |
| District             | District                 |  |
| Facility             | Facility                 |  |
| ID                   | ID                       |  |

20  
21  
22  
23  
24  
25  
26  
27  
28  
29  
30  
31  
32  
33  
34  
35  
36  
37  
38  
39  
40  
41  
42  
43  
44  
45  
46  
47  
48  
49  
50  
51  
52  
53  
54  
55  
56  
57  
58  
59  
60

| SECTION A: DEMOGRAPHICS |                                                                                                                                                                                     |                                                                                                                                                                                                                                |
|-------------------------|-------------------------------------------------------------------------------------------------------------------------------------------------------------------------------------|--------------------------------------------------------------------------------------------------------------------------------------------------------------------------------------------------------------------------------|
| Intro Note              | Thank you for agreeing to participate. Now I will ask you a few questions about yourself and who you are. Please feel free to answer honestly. There are no right or wrong answers. |                                                                                                                                                                                                                                |
| a7                      | What is your tribe?                                                                                                                                                                 | <ol style="list-style-type: none"> <li>1. Lomwe</li> <li>2. Sena</li> <li>3. Chewa</li> <li>4. Mang'anja/Nyanja</li> <li>5. Ngoni</li> <li>6. Tumbuka</li> <li>7. Tonga</li> <li>8. Yao</li> <li>99. Other, specify</li> </ol> |
| a3                      | What is the highest level of school you attended?                                                                                                                                   | <ol style="list-style-type: none"> <li>1. Primary</li> <li>2. Secondary</li> <li>3. Higher</li> </ol>                                                                                                                          |
| a3b                     | What class did you complete in your highest level of school?                                                                                                                        | _____                                                                                                                                                                                                                          |
| a4                      | Please think of the past 12 months, how would you describe your primary occupation?                                                                                                 | <ol style="list-style-type: none"> <li>1. Working formally (employed full time)</li> <li>2. Working informally (ganyu, farming, business)</li> <li>3. Not working</li> </ol>                                                   |
| a5                      | Are you currently married?                                                                                                                                                          | <ol style="list-style-type: none"> <li>1. Married</li> <li>2. Live-in partner</li> <li>3. Steady Boyfriend</li> <li>4. Separated</li> <li>5. Divorced</li> </ol>                                                               |

|                                    |                                                                                                                                                                                                                             |                                                                                                                |
|------------------------------------|-----------------------------------------------------------------------------------------------------------------------------------------------------------------------------------------------------------------------------|----------------------------------------------------------------------------------------------------------------|
|                                    |                                                                                                                                                                                                                             | 99. Other, specify                                                                                             |
| a6                                 | How many living children do you have?                                                                                                                                                                                       | _____                                                                                                          |
| a6b                                | What is the age of your <u>youngest</u> child?                                                                                                                                                                              | _____                                                                                                          |
| a6bc                               | What age is the child (in years or months)                                                                                                                                                                                  | _____                                                                                                          |
| a4b                                | How many children currently live with you?                                                                                                                                                                                  | _____                                                                                                          |
| a7                                 | How many sexual partners have you had in the past 12 months?                                                                                                                                                                | _____                                                                                                          |
| a8                                 | Have you had sex with someone besides your husband without a condom in the past 12 months?                                                                                                                                  | 2. Yes<br>0. No<br>88. Don't know/ Not sure<br>89. Refused to answer                                           |
| a8b                                | Have you had sex without a condom in the past 12 months?                                                                                                                                                                    | 2. Yes<br>0. No<br>88. Don't know/ Not sure<br>89. Refused to answer                                           |
| <b>SECTION B: INCOME QUESTIONS</b> |                                                                                                                                                                                                                             |                                                                                                                |
| Intro Note                         | I will now discuss with you about the valuable items that you or your household possesses. As I will be chatting with you I will also some questions about money you have and activities that you indulge in to find money. |                                                                                                                |
| b1                                 | Please think of the past 12 months, how would you describe your primary occupation?                                                                                                                                         | 1. Working formally (employed full time)<br>2. Working informally (ganyu, farming, business)<br>3. Not working |

|                  |                                                                                                                                                                                           |                 |
|------------------|-------------------------------------------------------------------------------------------------------------------------------------------------------------------------------------------|-----------------|
| b1b              | Think about all the work you have done in the past month. How many days did you normally work this month that gave you pay?                                                               | _____           |
| b2               | Do you have any savings for the future, such as a bank account, savings group or cash?                                                                                                    | 2. Yes<br>0. No |
| Household Assets |                                                                                                                                                                                           |                 |
| b3               | Does your household have:<br><i>The respondent said that his/her household doesn't have any of the household assets. Please probe and ensure that this is correct before you proceed.</i> |                 |
| b3_1             | Metal Roof?                                                                                                                                                                               | 2. Yes<br>0. No |
| b3_2             | Electricity?                                                                                                                                                                              | 2. Yes<br>0. No |
| b3_3             | Paraffin lamp with no glass?                                                                                                                                                              | 2. Yes<br>0. No |
| b3_4             | A paraffin lamp?                                                                                                                                                                          | 2. Yes<br>0. No |
| b3_5             | A radio?                                                                                                                                                                                  | 2. Yes<br>0. No |
| b3_6             | A television?                                                                                                                                                                             | 2. Yes<br>0. No |
| b3_7             | A cellular phone?                                                                                                                                                                         | 2. Yes<br>0. No |
| b3_8             | A bed?                                                                                                                                                                                    | 2. Yes<br>0. No |
| b3_9             | A sofa set?                                                                                                                                                                               | 2. Yes<br>0. No |
| b3_10            | A table?                                                                                                                                                                                  | 2. Yes          |



|              |                                                                                   |                 |
|--------------|-----------------------------------------------------------------------------------|-----------------|
|              |                                                                                   | 0. No           |
| b3_11        | A refrigerator                                                                    | 2. Yes<br>0. No |
| b3_12        | Mattress?                                                                         | 2. Yes<br>0. No |
| b3_13        | Chair(s)?                                                                         | 2. Yes<br>0. No |
| b3_14        | Cattle?                                                                           | 2. Yes<br>0. No |
| b3_15        | Goat?                                                                             | 2. Yes<br>0. No |
| b3_16        | Sheep?                                                                            | 2. Yes<br>0. No |
| b3_17        | Pigs?                                                                             | 2. Yes<br>0. No |
| b3_18        | Donkey?                                                                           | 2. Yes<br>0. No |
| b3_19        | Chickens?                                                                         | 2. Yes<br>0. No |
| b3_20        | Other poultry?                                                                    | 2. Yes<br>0. No |
| b4           | In the past 30 days, have you drank beer?                                         | 2. Yes<br>0. No |
| b4b          | How many days in the past 30 days have you drank beer?                            | _____           |
| b4c          | How much money did you spend on beer the last time you went?                      | MWK:            |
| b4d          | In total, approximately how much money did you spend on beer in the past 30 days? | MWK:            |
| Relationship |                                                                                   |                 |

|                                                                            |                 |                                                                                |                                                                                                                                                                      |
|----------------------------------------------------------------------------|-----------------|--------------------------------------------------------------------------------|----------------------------------------------------------------------------------------------------------------------------------------------------------------------|
| 1<br>2<br>3<br>4<br>5<br>6                                                 | Intro Note      | Now I'd like to talk to you about your current sexual relationship             |                                                                                                                                                                      |
| 7<br>8<br>9<br>10<br>11                                                    | f8              | How long have you been/were you in a sexual relationship with your partner?    | Days _____<br>Months _____<br>Years _____                                                                                                                            |
| 12<br>13<br>14                                                             | f9              | Do you have children with your partner?<br>How many children?                  | _____                                                                                                                                                                |
| 15<br>16<br>17<br>18<br>19<br>20<br>21<br>22<br>23                         | f10             | How often do you currently talk to your partner?                               | 1. Everyday<br>2. A couple times a week<br>3. Once a week<br>4. A couple times a month<br>5. Once a month<br>6. Less than once a month<br>7. Not at all (never)      |
| 24<br>25<br>26<br>27<br>28<br>29                                           | f10b            | In a typical month, who earns more money? You, or your partner?                | 1. Myself<br>2. This partner<br>3. We earn the same amount<br><br>88. Don't know                                                                                     |
| 30                                                                         | Decision Making |                                                                                |                                                                                                                                                                      |
| 31<br>32<br>33<br>34                                                       | Intro Note      | Now I would like to talk to you about how you and your partner make decisions. |                                                                                                                                                                      |
| 35<br>36<br>37<br>38<br>39<br>40<br>41<br>42<br>43                         | f11             | Who usually decides how the money you earn will be used?                       | 1. Yourself (Respondent)<br>2. Jointly (This partner and you together)<br>3. Mainly this partner<br>4. Someone else<br>5. Do not earn money<br><br>88. Refuse to say |
| 44<br>45<br>46<br>47                                                       | f11b            | (if above question=4 ) Who decides?                                            | _____                                                                                                                                                                |
| 48<br>49<br>50<br>51<br>52<br>53<br>54<br>55<br>56<br>57<br>58<br>59<br>60 | f12             | Who usually decides how your partner's earnings will be used?                  | 1. Yourself (Respondent)<br>2. Jointly (This partner and you together)<br>3. Mainly this partner<br>4. Someone else<br>5. Do not earn money<br><br>88. Refuse to say |

|      |                                                                                 |                                                                                                                                                                                                                                                                    |
|------|---------------------------------------------------------------------------------|--------------------------------------------------------------------------------------------------------------------------------------------------------------------------------------------------------------------------------------------------------------------|
| f12b | (if above question=4 ) Who decides?                                             | _____                                                                                                                                                                                                                                                              |
| f13  | Who usually makes decisions about health care for yourself?                     | <ol style="list-style-type: none"> <li>1. Yourself (Respondent)</li> <li>2. Jointly (This partner and you together)</li> <li>3. Mainly this partner</li> <li>4. Someone else</li> <li>5. Not applicable/ Don't have children</li> <li>88. Refuse to say</li> </ol> |
| f13b | (if above question=4 ) Who decides?                                             | _____                                                                                                                                                                                                                                                              |
| f14  | Who usually makes decisions about health care for your child with this partner? | <ol style="list-style-type: none"> <li>1. Yourself (Respondent)</li> <li>2. Jointly (This partner and you together)</li> <li>3. Mainly this partner</li> <li>4. Someone else</li> <li>5. Not applicable/ Don't have children</li> <li>88. Refuse to say</li> </ol> |
| f14b | (if above question=4 ) Who decides?                                             | _____                                                                                                                                                                                                                                                              |
| f15  | Who usually makes decisions about health care for your partner?                 | <ol style="list-style-type: none"> <li>1. Yourself (Respondent)</li> <li>2. Jointly (This partner and you together)</li> <li>3. Mainly this partner</li> <li>4. Someone else</li> <li>5. Not applicable/ Don't have children</li> <li>88. Refuse to say</li> </ol> |
| f15b | (if above question=4 ) Who decides?                                             | _____                                                                                                                                                                                                                                                              |
| f16  | Who usually makes decisions about making major household purchases?             | <ol style="list-style-type: none"> <li>1. Yourself (Respondent)</li> <li>2. Jointly (This partner and you together)</li> <li>3. Mainly this partner</li> <li>4. Someone else</li> </ol>                                                                            |

|          |                                                                                                                                                                                                                                                                                                                                                                                                                                                                                                                                                                                                                                                                   |                                                             |
|----------|-------------------------------------------------------------------------------------------------------------------------------------------------------------------------------------------------------------------------------------------------------------------------------------------------------------------------------------------------------------------------------------------------------------------------------------------------------------------------------------------------------------------------------------------------------------------------------------------------------------------------------------------------------------------|-------------------------------------------------------------|
|          |                                                                                                                                                                                                                                                                                                                                                                                                                                                                                                                                                                                                                                                                   | 5. Not applicable/ Don't have children<br>88. Refuse to say |
| f16b     | (if above question=4 ) Who decides?                                                                                                                                                                                                                                                                                                                                                                                                                                                                                                                                                                                                                               |                                                             |
| Note     | I would like to ask you questions about [probability/chance/likelihood] that certain things will happen. There are ten beans in this cup. I will ask you to pick some of the beans and put them in the plate. The number of beans that you are going to put in the plate will reflect the probability that something will happen. One bean means there is very little chance that something will happen. If you do not put any bean in the plate it means you are certain that there is no likelihood that something will happen.                                                                                                                                 |                                                             |
| note2    | If you put additional beans in the plate it means the chance that something will happen will also increase. For example, if you put one or two beans in the plate, it means there is little chance that something will happen. Even though there is little chance but it can happen. If you put ten beans it means there is equal chance of something happening or not. If you put six beans it means the chance that something will happen is slightly greater than not happening. If you put all ten beans, it means you are certain that whatever the case something will really happen. There is no wrong or right answer I just want to know what you think. |                                                             |
| note3    | INTERVIEWER: Report for each question the NUMBER OF BEANS put in the PLATE. After each question, replace the beans on the table (unless otherwise noted).                                                                                                                                                                                                                                                                                                                                                                                                                                                                                                         |                                                             |
| Practice |                                                                                                                                                                                                                                                                                                                                                                                                                                                                                                                                                                                                                                                                   |                                                             |
| pr1      | Pick the number of beans that reflects how likely you think it is that:                                                                                                                                                                                                                                                                                                                                                                                                                                                                                                                                                                                           | _____                                                       |

|                                           |                                                                                                                                                                                                                                                                                                                                                                                                                        |                 |
|-------------------------------------------|------------------------------------------------------------------------------------------------------------------------------------------------------------------------------------------------------------------------------------------------------------------------------------------------------------------------------------------------------------------------------------------------------------------------|-----------------|
| pr1b                                      | You will go to the market at least once within the next 2 days.                                                                                                                                                                                                                                                                                                                                                        | _____           |
| pr1c                                      | You will go to the market at least once within the next 2 weeks.                                                                                                                                                                                                                                                                                                                                                       | _____           |
| <b>Practice</b>                           |                                                                                                                                                                                                                                                                                                                                                                                                                        |                 |
| pr2                                       | INTERVIEWER: Did Respondent add any beans between pr1b and pr1c?                                                                                                                                                                                                                                                                                                                                                       | 2. Yes<br>0. No |
| pr3                                       | Remember, as time goes by, you may find more time to go to the market. Therefore, you should have added beans to the plate. Let me ask you again. Now, add beans in the plate so that the number of beans in the plate reflects how likely you think it is that you will go to the market at least once within 2 weeks.<br><br>How likely you think it is that you will go to the market at least once within 2 weeks? | _____           |
| f17                                       | Pick the number of beans that reflects how likely you think:                                                                                                                                                                                                                                                                                                                                                           |                 |
| f17a                                      | You will still be married/with [partner one year from now.                                                                                                                                                                                                                                                                                                                                                             | _____           |
| f17b                                      | Your partner will become sick during the next 12 months                                                                                                                                                                                                                                                                                                                                                                | _____           |
| f17c                                      | Your partner will start ART treatment in the next 3 months                                                                                                                                                                                                                                                                                                                                                             | _____           |
| f17d                                      | Your partner will disclose your HIV status to your close friends/family in the next 3 months                                                                                                                                                                                                                                                                                                                           | _____           |
| <b>SELF REPORTED HEALTH AND HAPPINESS</b> |                                                                                                                                                                                                                                                                                                                                                                                                                        |                 |
| Intro Note                                | Now I'd like to talk to you about how healthy and happy you feel.                                                                                                                                                                                                                                                                                                                                                      |                 |

|                                   |                                                                                                                                             |                                                                                                                                                                                      |
|-----------------------------------|---------------------------------------------------------------------------------------------------------------------------------------------|--------------------------------------------------------------------------------------------------------------------------------------------------------------------------------------|
| e1                                | I am interested in your general level of well-being or satisfaction with life. How satisfied are you with your life, all things considered? | <ol style="list-style-type: none"> <li>1. Very satisfied</li> <li>2. Somewhat satisfied</li> <li>3. Neutral</li> <li>4. Somewhat unsatisfied</li> <li>5. Very unsatisfied</li> </ol> |
| e2                                | Do you think that you are more, equally or less satisfied than other persons your age and sex living in your village?                       | <ol style="list-style-type: none"> <li>1. More satisfied</li> <li>2. Equally satisfied</li> <li>3. Less satisfied</li> </ol>                                                         |
| e3                                | In general, would you say your health now is: very good, good, poor or very poor?                                                           | <ol style="list-style-type: none"> <li>1. Very good</li> <li>2. Good</li> <li>3. Poor</li> <li>4. Very poor</li> </ol>                                                               |
| e4                                | How would you compare your health to other people of the same age and sex in your village?                                                  | <ol style="list-style-type: none"> <li>1. More healthy</li> <li>2. Equally healthy</li> <li>3. Less healthy</li> </ol>                                                               |
| e5                                | In the past month, how many days were you too sick to work/go to school/complete household chores?                                          | _____                                                                                                                                                                                |
| <b>Happiness</b>                  |                                                                                                                                             |                                                                                                                                                                                      |
| e6                                | How true are the following statements for you in the last month?                                                                            |                                                                                                                                                                                      |
| e6_1                              | I have felt depressed                                                                                                                       | <ol style="list-style-type: none"> <li>1. Strongly Agree</li> <li>2. Agree</li> <li>3. Disagree</li> <li>4. Strongly Disagree</li> </ol>                                             |
| e6_2                              | I have felt life was not worth living                                                                                                       | <ol style="list-style-type: none"> <li>1. Strongly Agree</li> <li>2. Agree</li> <li>3. Disagree</li> <li>4. Strongly Disagree</li> </ol>                                             |
| e6_3                              | I have felt content.                                                                                                                        | <ol style="list-style-type: none"> <li>1. Strongly Agree</li> <li>2. Agree</li> <li>3. Disagree</li> <li>4. Strongly Disagree</li> </ol>                                             |
| e6_4                              | I have felt lonely                                                                                                                          | <ol style="list-style-type: none"> <li>1. Strongly Agree</li> <li>2. Agree</li> <li>3. Disagree</li> <li>4. Strongly Disagree</li> </ol>                                             |
| <b>GENDER EQUITABLE MEN SCALE</b> |                                                                                                                                             |                                                                                                                                                                                      |

|      |                                                                                                            |                                                                                                                                                                                      |
|------|------------------------------------------------------------------------------------------------------------|--------------------------------------------------------------------------------------------------------------------------------------------------------------------------------------|
| Note | Please tell me if you strongly agree, agree, disagree, or strongly disagree with the following statements: |                                                                                                                                                                                      |
| j1   | Woman's most important role is to take care of her home and cook (take care of home is about housekeeping) | <ol style="list-style-type: none"> <li>1. Strongly Agree</li> <li>2. Agree</li> <li>3. Unsure</li> <li>4. Disagree</li> <li>5. Strongly Disagree</li> </ol> <p>88. Refuse to say</p> |
| j2   | Men need sex more than women                                                                               | <ol style="list-style-type: none"> <li>1. Strongly Agree</li> <li>2. Agree</li> <li>3. Unsure</li> <li>4. Disagree</li> <li>5. Strongly Disagree</li> </ol> <p>88. Refuse to say</p> |
| j3   | Men don't talk about sex, they just do it.                                                                 | <ol style="list-style-type: none"> <li>1. Strongly Agree</li> <li>2. Agree</li> <li>3. Unsure</li> <li>4. Disagree</li> <li>5. Strongly Disagree</li> </ol> <p>88. Refuse to say</p> |
| j4   | There are times when a woman deserves to be beaten                                                         | <ol style="list-style-type: none"> <li>1. Strongly Agree</li> <li>2. Agree</li> <li>3. Unsure</li> <li>4. Disagree</li> <li>5. Strongly Disagree</li> </ol> <p>88. Refuse to say</p> |
| j5   | Changing diapers, giving kids a bath & feeding kids are mother's responsibility                            | <ol style="list-style-type: none"> <li>1. Strongly Agree</li> <li>2. Agree</li> <li>3. Unsure</li> <li>4. Disagree</li> <li>5. Strongly Disagree</li> </ol> <p>88. Refuse to say</p> |
| j6   | It is a woman's responsibility to avoid getting pregnant                                                   | <ol style="list-style-type: none"> <li>1. Strongly Agree</li> <li>2. Agree</li> <li>3. Unsure</li> <li>4. Disagree</li> <li>5. Strongly Disagree</li> </ol> <p>88. Refuse to say</p> |

|      |                                                                            |                                                                                                                                                                                      |
|------|----------------------------------------------------------------------------|--------------------------------------------------------------------------------------------------------------------------------------------------------------------------------------|
| j7   | A man should have the final word about decisions in his home               | <ol style="list-style-type: none"> <li>1. Strongly Agree</li> <li>2. Agree</li> <li>3. Unsure</li> <li>4. Disagree</li> <li>5. Strongly Disagree</li> </ol> <p>88. Refuse to say</p> |
| j8   | Men are always ready to have sex                                           | <ol style="list-style-type: none"> <li>1. Strongly Agree</li> <li>2. Agree</li> <li>3. Unsure</li> <li>4. Disagree</li> <li>5. Strongly Disagree</li> </ol> <p>88. Refuse to say</p> |
| j9   | A woman should tolerate violence in order to keep her family together      | <ol style="list-style-type: none"> <li>1. Strongly Agree</li> <li>2. Agree</li> <li>3. Unsure</li> <li>4. Disagree</li> <li>5. Strongly Disagree</li> </ol> <p>88. Refuse to say</p> |
| j10a | I would be outraged if my wife asked me to use a condom.                   | <ol style="list-style-type: none"> <li>1. Strongly Agree</li> <li>2. Agree</li> <li>3. Unsure</li> <li>4. Disagree</li> <li>5. Strongly Disagree</li> </ol> <p>88. Refuse to say</p> |
| j10b | Men would be outraged if their wife asked them to use a condom             | <ol style="list-style-type: none"> <li>1. Strongly Agree</li> <li>2. Agree</li> <li>3. Unsure</li> <li>4. Disagree</li> <li>5. Strongly Disagree</li> </ol> <p>88. Refuse to say</p> |
| j11  | A man and a woman should decide together what type of contraceptive to use | <ol style="list-style-type: none"> <li>1. Strongly Agree</li> <li>2. Agree</li> <li>3. Unsure</li> <li>4. Disagree</li> <li>5. Strongly Disagree</li> </ol> <p>88. Refuse to say</p> |
| j12  | I would never have a homosexual friend                                     | <ol style="list-style-type: none"> <li>1. Strongly Agree</li> <li>2. Agree</li> <li>3. Unsure</li> <li>4. Disagree</li> </ol>                                                        |



|      |                                                                                       |                                                                                                        |
|------|---------------------------------------------------------------------------------------|--------------------------------------------------------------------------------------------------------|
|      |                                                                                       | 5. Strongly Disagree<br>88. Refuse to say                                                              |
| j13a | If someone insults me, I will defend my reputation, with force if I have to.          | 1. Strongly Agree<br>2. Agree<br>3. Unsure<br>4. Disagree<br>5. Strongly Disagree<br>88. Refuse to say |
| j13b | If someone insults a man, he should defend his reputation, with force if he has to    | 1. Strongly Agree<br>2. Agree<br>3. Unsure<br>4. Disagree<br>5. Strongly Disagree<br>88. Refuse to say |
| j14  | To be a man you need to be tough.                                                     | 1. Strongly Agree<br>2. Agree<br>3. Unsure<br>4. Disagree<br>5. Strongly Disagree<br>88. Refuse to say |
| j15  | Men should be embarrassed if unable to get an erection                                | 1. Strongly Agree<br>2. Agree<br>3. Unsure<br>4. Disagree<br>5. Strongly Disagree<br>88. Refuse to say |
| j16  | If a guy gets a woman pregnant, child is the responsibility of both the man and woman | 1. Strongly Agree<br>2. Agree<br>3. Unsure<br>4. Disagree<br>5. Strongly Disagree<br>88. Refuse to say |
| j17  | A man should know what his partner likes during sex                                   | 1. Strongly Agree<br>2. Agree<br>3. Unsure<br>4. Disagree<br>5. Strongly Disagree<br>88. Refuse to say |

|                    |                                                                                                                         |                                                                                                                                                                                      |
|--------------------|-------------------------------------------------------------------------------------------------------------------------|--------------------------------------------------------------------------------------------------------------------------------------------------------------------------------------|
| j18                | The participation of the father is important in raising children                                                        | <ol style="list-style-type: none"> <li>1. Strongly Agree</li> <li>2. Agree</li> <li>3. Unsure</li> <li>4. Disagree</li> <li>5. Strongly Disagree</li> </ol> <p>88. Refuse to say</p> |
| j19                | It's important for men to have friends to talk about their problems                                                     | <ol style="list-style-type: none"> <li>1. Strongly Agree</li> <li>2. Agree</li> <li>3. Unsure</li> <li>4. Disagree</li> <li>5. Strongly Disagree</li> </ol> <p>88. Refuse to say</p> |
| j20                | A couple should decide together if they want to have children.                                                          | <ol style="list-style-type: none"> <li>1. Strongly Agree</li> <li>2. Agree</li> <li>3. Unsure</li> <li>4. Disagree</li> <li>5. Strongly Disagree</li> </ol> <p>88. Refuse to say</p> |
| Comment            | We have reached the end of the chat. Thank you for your time. Do you have anything else you would like to say?          |                                                                                                                                                                                      |
| End Note           | Thank the participant for their time and give them transport reimbursement, if they did not come for an ART appointment |                                                                                                                                                                                      |
| Comments           | Enumerator comments                                                                                                     |                                                                                                                                                                                      |
| End of the survey! |                                                                                                                         |                                                                                                                                                                                      |

**BASELINE SURVEY**  
**Identifying efficient linkages strategies for HIVST (IDEaL)**  
 Female (Chichewa)

| Question Name                  | Label                                                                                                                                                                                                 | Responses                                                                                                                                                                                                                      |
|--------------------------------|-------------------------------------------------------------------------------------------------------------------------------------------------------------------------------------------------------|--------------------------------------------------------------------------------------------------------------------------------------------------------------------------------------------------------------------------------|
| <b>INTRODUCTION SECTION</b>    |                                                                                                                                                                                                       |                                                                                                                                                                                                                                |
| interviewer                    | Full Name of Interviewer                                                                                                                                                                              |                                                                                                                                                                                                                                |
| Interview date                 | Interview date                                                                                                                                                                                        |                                                                                                                                                                                                                                |
| Time start                     | Time survey started                                                                                                                                                                                   |                                                                                                                                                                                                                                |
| District                       | District                                                                                                                                                                                              |                                                                                                                                                                                                                                |
| Facility                       | Facility                                                                                                                                                                                              |                                                                                                                                                                                                                                |
| ID                             | ID                                                                                                                                                                                                    |                                                                                                                                                                                                                                |
| <b>SECTION A: DEMOGRAPHICS</b> |                                                                                                                                                                                                       |                                                                                                                                                                                                                                |
| Intro Note                     | Zikomo povomera kutenga nawo mbali. Pa nthawi ino ndikufunsani ma funso ochepa okhudza za inu komanso kuti ndinu ndani. Chonde khalani omasuka kuyankha moona. Palibe yankho lokhoza komanso lolakwa. |                                                                                                                                                                                                                                |
| a7                             | Ndinu mtundu wanji wa munthu?                                                                                                                                                                         | <ol style="list-style-type: none"> <li>1. Lomwe</li> <li>2. Sena</li> <li>3. Chewa</li> <li>4. Mang'anja/Nyanja</li> <li>5. Ngoni</li> <li>6. Tumbuka</li> <li>7. Tonga</li> <li>8. Yao</li> <li>99. Other, specify</li> </ol> |

|      |                                                                                                                             |                                                                                                                                |
|------|-----------------------------------------------------------------------------------------------------------------------------|--------------------------------------------------------------------------------------------------------------------------------|
| a3   | Kodi maphunziro anu mudapita nawo patali bwanji?                                                                            | 1. Pulayimale<br>2. Sekondale<br>3. Koleji                                                                                     |
| a3b  | Ndi kalasi liti munamaliza ya maphunziro anu apamwamba?                                                                     | _____                                                                                                                          |
| a4   | Chonde ganizani za masabata khumi ndi awiri apitawa, mungafotokoze bwanji za ntchito yomwe mumagwira?                       | 1. Ntchito yokhazikika<br>2. Ganyu/bisinesi<br>3. Sindikugwira ntchito                                                         |
| a5   | Kodi pakadali pano muli pa banja?                                                                                           | 1. Pa banja<br>2. Kukhala limodzi ngati banja<br>3. Chibwezi Chokhazikika<br>4. Tinasiyana<br>5. Banja linatha<br><br>99. Zina |
| a6   | Muli ndi ana angati amoyo?                                                                                                  | _____                                                                                                                          |
| a6b  | Mwana wanu wang'ono ali ndi zaka zingati?                                                                                   | _____                                                                                                                          |
| a6bc | Mwana wanu wang'ono ali ndi zaka zingati?                                                                                   | _____                                                                                                                          |
| a4b  | Pakadali pano ana omwe mumakhala nawo ndi angati?                                                                           | _____                                                                                                                          |
| a7   | Pa miyezi khumi ndi iwiri yapitayi mwakhala ndi abwenzi ogonana nawo angati?                                                | _____                                                                                                                          |
| a8   | Mwakhlapo ndi bwenzi logonana kupatula akazi anu? amuna anu osagwiritsa ntchito kondomu mu miyezi khumi ndi awiri yapitayi? | 3. Eya<br>4. Ayi<br>88. Sindikudziwa<br>89. Akana kuyankha                                                                     |
| a8b  | Mwagonanapo ndi munthu osagwiritsa ntchito kondomu mu miyezi khumi ndi awiri yapitayi?                                      | 3. Eya<br>4. Ayi<br>88. Sindikudziwa<br>89. Akana kuyankha                                                                     |

| SECTION B: INCOME QUESTIONS |                                                                                                                                                                                                         |                                                                                                                                      |
|-----------------------------|---------------------------------------------------------------------------------------------------------------------------------------------------------------------------------------------------------|--------------------------------------------------------------------------------------------------------------------------------------|
| Intro Note                  | Pa nthawi ino ndikufunsani za zipangizo zomwe inu komanso apabanja panu alinazo. Mkati mwakucheza kwathu ndikufunsaninso za ndalama zomwe mulinazo komanso komanso zomwe mumachita kuti mupeze ndalama. |                                                                                                                                      |
| b1                          | Chonde ganizirani za miyezi Khumi ndi iwiri yapitayi, mungafotokoze bwanji za ntchito yomwe mumagwira?                                                                                                  | <ol style="list-style-type: none"> <li>1. Ntchito yokhazikika</li> <li>2. Ganyu/bisinesi</li> <li>3. Sindikugwira ntchito</li> </ol> |
| b1b                         | Ganizani za ntchito zonse mwagwira mwezi watha. Mwagwira masiku angati olipidwa?                                                                                                                        | _____                                                                                                                                |
| b2                          | Muli ndi ndalama zilizonse zomwe mukusungira za mtsogolo monga, ku banki, gulu losugira ndalama kapena ndalama zosunga kunyumba?                                                                        | <ol style="list-style-type: none"> <li>2. Eya</li> <li>3. Ayi</li> </ol>                                                             |
| Household Assets            |                                                                                                                                                                                                         |                                                                                                                                      |
| b3                          | Does your household have:<br><i>The respondent said that his/her household doesn't have any of the household assets. Please probe and ensure that this is correct before you proceed.</i>               |                                                                                                                                      |
| b3_1                        | Denga la malata?                                                                                                                                                                                        | <ol style="list-style-type: none"> <li>1. Eya</li> <li>2. Ayi</li> </ol>                                                             |
| b3_2                        | Magetsi ?                                                                                                                                                                                               | <ol style="list-style-type: none"> <li>3. Eya</li> <li>4. Ayi</li> </ol>                                                             |
| b3_3                        | Koloboyi?                                                                                                                                                                                               | <ol style="list-style-type: none"> <li>3. Eya</li> <li>4. Ayi</li> </ol>                                                             |
| b3_4                        | Nyali?                                                                                                                                                                                                  | <ol style="list-style-type: none"> <li>3. Eya</li> <li>4. Ayi</li> </ol>                                                             |
| b3_5                        | Wailesi?                                                                                                                                                                                                | <ol style="list-style-type: none"> <li>3. Eya</li> <li>4. Ayi</li> </ol>                                                             |
| b3_6                        | Kanema?                                                                                                                                                                                                 | <ol style="list-style-type: none"> <li>3. Eya</li> <li>4. Ayi</li> </ol>                                                             |
| b3_7                        | Lamya ya M'manja?                                                                                                                                                                                       | <ol style="list-style-type: none"> <li>3. Eya</li> <li>4. Ayi</li> </ol>                                                             |
| b3_8                        | Kama?                                                                                                                                                                                                   | <ol style="list-style-type: none"> <li>3. Eya</li> </ol>                                                                             |

|              |                                                                                |                              |
|--------------|--------------------------------------------------------------------------------|------------------------------|
|              |                                                                                | 4. Ayi                       |
| b3_9         | Sofa?                                                                          | 3. Eya<br>4. Ayi             |
| b3_10        | Tebulo?                                                                        | 3. Eya<br>4. Ayi             |
| b3_11        | Filiji?                                                                        | 3. Eya<br>4. Ayi             |
| b3_12        | Matilesi?                                                                      | 3. Eya<br>4. Ayi             |
| b3_13        | Mipando                                                                        | 3. Eya<br>4. Ayi             |
| b3_14        | Ng'ombe?                                                                       | 3. Eya<br>4. Ayi             |
| b3_15        | Mbuzi?                                                                         | 3. Eya<br>4. Ayi             |
| b3_16        | Nkhosa?                                                                        | 3. Eya<br>4. Ayi             |
| b3_17        | Nkhumba?                                                                       | 3. Eya<br>4. Ayi             |
| b3_18        | Bulu?                                                                          | 3. Eya<br>4. Ayi             |
| b3_19        | Nkhuku?                                                                        | 3. Eya<br>4. Ayi             |
| b3_20        | Zoweta zina                                                                    | 3. Eya<br>4. Ayi             |
| b4           | Mu masiku makumi atatu apitawa mwamako mowa?                                   | 3. Eya<br>4. Ayi             |
| b4b          | Pa masiku makumi atatu apitawa mwamwa mowa masiku angati?                      | _____                        |
| b4c          | Mwataya ndalama zingati masiku omaliza omwe munapita ku mowa?                  | MWK:                         |
| b4d          | Zonse pamodzi, mwataya ndalama zingati pa mowa mu masiku makumi atatu apitawa? | MWK:                         |
| Relationship |                                                                                |                              |
| Intro Note   | Panthawi ino ndikufunsani za abwezi ogonana nawo?                              |                              |
| f8           | Mwakhala pa ubwenzi ogonana ndi bwenzi lanu kwa nthawi yayitali bwanji?        | Masiku _____<br>Miyezi _____ |

|                 |                                                                                                     |                                                                                                                                                                       |
|-----------------|-----------------------------------------------------------------------------------------------------|-----------------------------------------------------------------------------------------------------------------------------------------------------------------------|
|                 |                                                                                                     | Zaka _____                                                                                                                                                            |
| f9              | Muli ndi ana ndi bwenzi lanu logonana nalo? Ana angati?                                             | _____                                                                                                                                                                 |
| f10             | Mumayankhulana mowirikiza bwanji ndi bwenzi lanu pakadali pano?                                     | 8. Tsiku ndi tsiku<br>9. Masiku angapo pasabata<br>10. Kamodzi pa sabata<br>11. Kangapo pa mwezi<br>12. Kamodzi pa mwezi<br>13. Kosakwana mwezi<br>14. Sitiyankhulani |
| f10b            | Pa mwezi amalandila ndalama zambiri ndi ndani? Inu kapena bwenzi lanu?                              | 5. Ine<br>6. Bwenzi langa<br>7. Timalandira ndalama zofanana<br>8. Sindikudziwa                                                                                       |
| Decision Making |                                                                                                     |                                                                                                                                                                       |
| Intro Note      | Pa nthawi ino ndikufunsani za momwe mumapangira maganizo ndi bwenzi lanu                            |                                                                                                                                                                       |
| f11             | Nthawi zambiri ndi ndani amene amapanga chiganizo cha momwe ndalama mumapeze zigwiritsidwe ntchito? | 6. Ine<br>7. Timagwirizana<br>8. Nthawi zambiri bwenzi langa<br>9. Munthu wina<br>10. Sindipeza ndalama<br>89. Sindikufuna kuyankha                                   |
| f11b            | (Ngati yankho ndi 4) Amapanga chiganizo ndi ndani?                                                  | _____                                                                                                                                                                 |
| f12             | Amapanga chiganizo cha momwe ndalama za bwenzi lanu zigwiritsidwe ntchito ndi ndani?                | 6. Ine<br>7. Timagwirizana<br>8. Nthawi zambiri bwenzi langa<br>9. Munthu wina<br>10. Sindipeza ndalama<br>89. Sindikufuna kuyankha                                   |
| f12b            | (Ngati yankho ndi 4)                                                                                | _____                                                                                                                                                                 |

|      |                                                                                                               |                                                                                                                                     |
|------|---------------------------------------------------------------------------------------------------------------|-------------------------------------------------------------------------------------------------------------------------------------|
| f13  | Nthawi zambiri amapanga chiganizo chokhudza thandizo la zaumoyo wanu ndi ndani?                               | 6. Ine<br>7. Timagwirizana<br>8. Nthawi zambiri bwenzi langa<br>9. Munthu wina<br>10. Sindipeza ndalama<br>89. Sindikufuna kuyankha |
| f13b | (Ngati yankho ndi 4) Amapanga chiganizo ndi ndani?                                                            | _____                                                                                                                               |
| f14  | Nthawi zambiri amapanga chiganizo cha thandizo la zaumoyo la mwana yemwe muli naye ndi bwenzi lanu ndi ndani? | 6. Ine<br>7. Mogwirizana<br>8. Nthawi zambiri bwenzi langa<br>9. Munthu wina<br>10. Ndilibe mwana<br><br>88. Sindikufuna kuyankha   |
| f14b | (if above question=4 ) Who decides?                                                                           | _____                                                                                                                               |
| f15  | Nthawi zambiri amapanga chiganizo chokhudza thandizo la zaumoyo la bwenzi lanu ndi ndani?                     | 1. Ine<br>2. Mogwirizana<br>3. Nthawi zambiri bwenzi langa<br>4. Munthu wina<br>5. Ndilibe ana<br>88.Sindikufuna kuyankha           |
| f15b | (Ngati yankho ndi 4) Amapanga chiganizo ndi ndani?                                                            | _____                                                                                                                               |
| f16  | Kodi ndi ndani amene amapanga ziganizo zogula katundu mkulumkulu wapa khomo panu?                             | 1. Ine<br>2. Mogwirizana<br>3. Nthawi zambiri bwenzi langa<br>4. Munthu wina<br>5. Ndilibe ana<br>88.Sindikufuna kuyankha           |
| f16b | (Ngati yankho ndi 4) Amapanga                                                                                 |                                                                                                                                     |



|          |                                                                                                                                                                                                                                                                                                                                                                                                                                                                                                                                                                                                                                                                                                                  |  |
|----------|------------------------------------------------------------------------------------------------------------------------------------------------------------------------------------------------------------------------------------------------------------------------------------------------------------------------------------------------------------------------------------------------------------------------------------------------------------------------------------------------------------------------------------------------------------------------------------------------------------------------------------------------------------------------------------------------------------------|--|
|          | chiganizo ndani?                                                                                                                                                                                                                                                                                                                                                                                                                                                                                                                                                                                                                                                                                                 |  |
| Note     | Ndikufuna ndikufunsemi zokhudzana za (Kuthekela/mwayi) kuti zinthu zina zichitike. Muli nyemba mu kapu. Ndikufunsemi kuti musankhe zina mwa nyemba ndipo muyike mu mbale. Mulingo wa nyemba omwe muyike mu mbale udzafanizira kuti chinachake chichitika. Nyemba imodzi ikusonyeza kuti mwayi ndiochepa kuti chinachake chichitika. Ngati simuika nyemba mm'bale ndekuti mukutsimikiza kuti palibe mwayi oti chinachake chichitika                                                                                                                                                                                                                                                                               |  |
| note2    | Ngati muyike nyemba zowonjezera mu mbale, zikutanthauza kuti mwayi oti chinachake chichitika uchuluka, mwachitsanzo ngati muyika nyemba imodzi kapena ziwiri mwayi oti chinachake chichitika. Ngakhale pali mwayi ochepa koma chinachake chichitika. Ngati muyike nyemba nkhumu zikutanthauza kuti pali mwayi ofanana oti chinachake chichika kapena ayi. Ngati muyike nyemba zisanu ndi imodzi zikutanthauza kuti mwayi woti chinachake chichitika uli ochulukilapo kuposa mwayi oti chinachake sichichitika. Ngati muyike nyemba zonse khumi ndekuti muli ndi chikhulupiliro chonse kuti chinachake chichitikadi pavute pasavute. Palibe yankho lokhonza kapena lolakwa ndikungofuna kudziwa zomwe mukuganiza. |  |
| note3    | Ofunsa: Pelekani yankho lanu pa funso lililonse nambala ya nyemba zomwe lili m'bale. Pakutha pa funso lililonse, bwezeletsani nyemba pa tebulo.                                                                                                                                                                                                                                                                                                                                                                                                                                                                                                                                                                  |  |
| Practice |                                                                                                                                                                                                                                                                                                                                                                                                                                                                                                                                                                                                                                                                                                                  |  |

|          |                                                                                                                                                                                                                                           |                  |
|----------|-------------------------------------------------------------------------------------------------------------------------------------------------------------------------------------------------------------------------------------------|------------------|
| pr1      | Sankhani mulingo wa nyemba omwe ukhale ndi kuthekela kumene mukuganiza kuti:                                                                                                                                                              | _____            |
| pr1b     | Mupita ku msika mosachepera kamodzi m' masiku awiri akudzawa                                                                                                                                                                              | _____            |
| pr1c     | Mupita ku msika mosachepera kamodzi m' masabata awiri akudzawa.                                                                                                                                                                           | _____            |
| Practice |                                                                                                                                                                                                                                           |                  |
| pr2      | Ofunsa: kodi oyankha anawonjezera nyamba pakati pa pr1b ndi pr1c                                                                                                                                                                          | 3. Eya<br>1. Ayi |
| pr3      | Kumbukurani kuti pamene nthawi ikupita muzipeza mpata wambiri opita kumsika. Choncho, munayenela kuti mwaika nyemba zambiri m' bale<br><br>Kodi mukuganiza kuti kumsika mupita mosachepela kamodzi bwanji mu nyengo ya ma sabata awiriwa? | _____            |
| f17      | Sankhani mlingo wa nyemba umene ufanizile kaganidwe kanu:                                                                                                                                                                                 |                  |

|                                           |                                                                                                                                                                 |                                                                                                                                      |
|-------------------------------------------|-----------------------------------------------------------------------------------------------------------------------------------------------------------------|--------------------------------------------------------------------------------------------------------------------------------------|
| f17a                                      | Mudzakhalabe pabanja ndi bwenzi lanu m'chaka chimodzi chikubwerachi                                                                                             | _____                                                                                                                                |
| f17b                                      | Bwenzi lanu lidzapezeka ndi matenda a HIV m'miyezi khumi ndi iwiri ikubwerayi                                                                                   | _____                                                                                                                                |
| f17c                                      | Bwenzi lanu lidzayamba kumwa ma ARV m'miyezi itatu ikubwerayi                                                                                                   | _____                                                                                                                                |
| f17d                                      | Bwenzi lanu lidzaulula kuti inuyo muli ndi kachilombo ka HIV kwa anzanu apamtima/abale anu m'miyezi itatu ikubwerayi                                            | _____                                                                                                                                |
| <b>SELF REPORTED HEALTH AND HAPPINESS</b> |                                                                                                                                                                 |                                                                                                                                      |
| Intro Note                                | Pa nthawi ino ndikufuna ndikambe nanu zokhudza umoyo ndi chisangalalo chanu.                                                                                    |                                                                                                                                      |
| e1                                        | Ndili ndi chidwi ndi mukudziwa za umoyo ndi kukhutitsidwa kwanu. Kodi muli okhutitsidwa bwanji ndi moyo wanu, pakutengela zonse.                                | 6. Okhutitsidwa kwamburi<br>7. Okhutitsidwa pang'ono<br>8. Pakatikati<br>9. Okhutitsidwa pang'ono<br>10. Osakhutitsidwa olo pang'ono |
| e2                                        | Kodi mukuona ngati muli okhutitsidwa mofanana kapena osakhutitsidwa pang'ono mosaposele anthu ena a muna kapena akazi a msinkhu wanu ndi opezeka m'mudzi mwanu? | 4. Okhutitsidwa kwambiri<br>5. Okhutitsidwa<br>6. Okhutitsidwa pang'ono                                                              |
| e3                                        | Kutengela zonse, Kodi munganene kuti umoyo wanu tsopano uli bwino kwambiri, ulibwino, sulibwino, suli bwino olo pang'ono                                        | 5. Bwino kwambiri<br>6. Bwino<br>7. Silibwino<br>8. Silibwino olo pang'ono                                                           |
| e4                                        | Kodi mungazifananizile bwanji za thanzi lanu ndi la anthu ena a msikhu ofanana ndi wanu, amuna kapena                                                           | 4. A thanzi kwambiri<br>5. A thanzi<br>6. Nthanzi lochepekela                                                                        |

|                            |                                                                                                                                                  |                                                                                                                            |
|----------------------------|--------------------------------------------------------------------------------------------------------------------------------------------------|----------------------------------------------------------------------------------------------------------------------------|
|                            | akazi a m'mudzi mwanu.                                                                                                                           |                                                                                                                            |
| e5                         | Kodi mwezi wathawu, ndi masiku angati omwe munadwara kwambiri ofika kukulepheretsani kugwira nthito/kupita ku sukulu/kugwira ntchito za pa khomo | _____                                                                                                                      |
| Happiness                  |                                                                                                                                                  |                                                                                                                            |
| e6                         | Kodi ziganizo izi ndi zowona bwanji kwa inu?                                                                                                     |                                                                                                                            |
| e6_1                       | Ndinali ndi nkhwawa                                                                                                                              | 5. Ndikugwirizana nazo kwambiri<br>6. Ndikugwirizana nazo<br>7. Sindikugwirizana nazo<br>8. Sindikugwirizana nazo kwambiri |
| e6_2                       | Ndimanva ngati moyo wafika                                                                                                                       | 5. Ndikugwirizana nazo kwambiri<br>6. Ndikugwirizana nazo<br>7. Sindikugwirizana nazo<br>8. Sindikugwirizana nazo kwambiri |
| e6_3                       | Ndimanva kukhutitsidwa                                                                                                                           | 5. Ndikugwirizana nazo kwambiri<br>6. Ndikugwirizana nazo<br>7. Sindikugwirizana nazo<br>8. Sindikugwirizana nazo kwambiri |
| e6_4                       | Ndimanva kusalidwa                                                                                                                               | 5. Ndikugwirizana nazo kwambiri<br>6. Ndikugwirizana nazo<br>7. Sindikugwirizana nazo<br>8. Sindikugwirizana nazo kwambiri |
| GENDER EQUITABLE MEN SCALE |                                                                                                                                                  |                                                                                                                            |
| Note                       | Chonde ndiuzeni ngati mukugwirizana nazo kwabiri, mukugwirizana nazo, simukugwirizana nazo, simukugwirizana nazo olo pang'ono ziganizo izi:      |                                                                                                                            |

|    |                                                                          |                                                                                                                                                                                      |
|----|--------------------------------------------------------------------------|--------------------------------------------------------------------------------------------------------------------------------------------------------------------------------------|
| j1 | Udindo ofunikila wa mzimayi ndi kusamala khomo lake ndi kuphika.         | 6. Ndikugwirizana nazo kwambiri<br>7. Ndikugwirizana nazo<br>8. Sindikukhulupilira<br>9. Sindikugwirizana nazo<br>10. Sindikugwirizana nazo olo pang'ono<br>89. Sindikufuna kuyankha |
| j2 | Abambo amafuna kugonana kuposa amayi                                     | 6. Ndikugwirizana nazo kwambiri<br>7. Ndikugwirizana nazo<br>8. Sindikukhulupilira<br>9. Sindikugwirizana nazo<br>10. Sindikugwirizana nazo olo pang'ono<br>88. Sindikufuna kuyankha |
| j3 | Azibambo sakonda kukambirana za kugonana amangochita                     | 6. Ndikugwirizana nazo kwambiri<br>7. Ndikugwirizana nazo<br>8. Sindikukhulupilira<br>9. Sindikugwirizana nazo<br>10. Sindikugwirizana nazo olo pang'ono<br>88. Sindikufuna kuyankha |
| j4 | Nthawi zina mzimayi amayenela kumenyedwa.                                | 6. Ndikugwirizana nazo kwambiri<br>7. Ndikugwirizana nazo<br>8. Sindikukhulupilira<br>9. Sindikugwirizana nazo<br>10. Sindikugwirizana nazo olo pang'ono<br>88. Sindikufuna kuyankha |
| j5 | Kusinta matewela, kusambitsa mwana, kudyetsa mwana ndi udindo wa mzimayi | 6. Ndikugwirizana nazo kwambiri<br>7. Ndikugwirizana nazo<br>8. Sindikukhulupilira<br>9. Sindikugwirizana nazo<br>10. Sindikugwirizana nazo olo pang'ono<br>88. Sindikufuna kuyankha |
| j6 | Ndi udindi wa mzimayi kupewa                                             | 6. Ndikugwirizana nazo kwambiri                                                                                                                                                      |

|      |                                                                             |                                                                                                                                                                                          |
|------|-----------------------------------------------------------------------------|------------------------------------------------------------------------------------------------------------------------------------------------------------------------------------------|
|      | kutenga mimba.                                                              | 7. Ndikugwirizana nazo<br>8. Sindikukhulupilira<br>9. Sindikugwirizana nazo<br>10. Sindikugwirizana nazo olo pang'ono<br><br>88. Sindikufuna kuyankha                                    |
| j7   | Mzibambo ayenela kukhala ndi chiganizo chomaliza cha mnyumba mwake.         | 6. Ndikugwirizana nazo kwambiri<br>7. Ndikugwirizana nazo<br>8. Sindikukhulupilira<br>9. Sindikugwirizana nazo<br>10. Sindikugwirizana nazo olo pang'ono<br><br>88. Sindikufuna kuyankha |
| j8   | Azibambo amakhala okonzeka ku gonana                                        | 6. Ndikugwirizana nazo kwambiri<br>7. Ndikugwirizana nazo<br>8. Sindikukhulupilira<br>9. Sindikugwirizana nazo<br>10. Sindikugwirizana nazo olo pang'ono<br><br>Sindikufuna kuyankha     |
| j9   | Mzimayi akuyenela kulekelela nkhaza kuti asunge banja lake.                 | 6. Ndikugwirizana nazo kwambiri<br>7. Ndikugwirizana nazo<br>8. Sindikukhulupilira<br>9. Sindikugwirizana nazo<br>10. Sindikugwirizana nazo olo pang'ono<br><br>Sindikufuna kuyankha     |
| j10a | Ndikhoza kukwiya akaza anga atati andiuze kuti ndigwiritse ntchito kondumu. | 6. Ndikugwirizana nazo kwambiri<br>7. Ndikugwirizana nazo<br>8. Sindikukhulupilira<br>9. Sindikugwirizana nazo<br>10. Sindikugwirizana nazo olo pang'ono<br><br>88. Sindikufuna kuyankha |
| j10b | Azibambo akhoza kukwiya akazi awo atawauza kuti agwiritse ntchito           | 6. Ndikugwirizana nazo kwambiri                                                                                                                                                          |

|      |                                                                                               |                                                                                                                                                                                          |
|------|-----------------------------------------------------------------------------------------------|------------------------------------------------------------------------------------------------------------------------------------------------------------------------------------------|
|      | kondomu                                                                                       | 7. Ndikugwirizana nazo<br>8. Sindikukhulupilira<br>9. Sindikugwirizana nazo<br>10. Sindikugwirizana nazo olo pang'ono<br><br>88. Sindikufuna kuyankha                                    |
| j11  | Mzimayi komanso nzibambo agwirizane limodzi kuti agwiritse ntchito njira yanji yakulela       | 6. Ndikugwirizana nazo kwambiri<br>7. Ndikugwirizana nazo<br>8. Sindikukhulupilira<br>9. Sindikugwirizana nazo<br>10. Sindikugwirizana nazo olo pang'ono<br><br>88. Sindikufuna kuyankha |
| j12  | Sindingakhale ndi nzanga wopanga zamathanyula                                                 | 6. Ndikugwirizana nazo kwambiri<br>7. Ndikugwirizana nazo<br>8. Sindikukhulupilira<br>9. Sindikugwirizana nazo<br>10. Sindikugwirizana nazo olo pang'ono<br><br>88. Sindikufuna kuyankha |
| j13a | Ngati munthu angandinyoze, ndiziteteza pogwiritsa ntchito mphanvu, ngati ndikufunika kutero.  | 6. Ndikugwirizana nazo kwambiri<br>7. Ndikugwirizana nazo<br>8. Sindikukhulupilira<br>9. Sindikugwirizana nazo<br>10. Sindikugwirizana nazo olo pang'ono<br><br>88. Sindikufuna kuyankha |
| j13b | Ngati munthu anganyoze mzibambo, aziteteze pogwiritsa ntchito mphanvu ngati akufunika kutelo. | 6. Ndikugwirizana nazo kwambiri<br>7. Ndikugwirizana nazo<br>8. Sindikukhulupilira<br>9. Sindikugwirizana nazo<br>10. Sindikugwirizana nazo olo pang'ono<br><br>Sindikufuna kuyankha     |
| j14  | Kuti ukhale mzibambo ukufunika kukhala ovuta.                                                 | 6. Ndikugwirizana nazo kwambiri<br>7. Ndikugwirizana nazo<br>8. Sindikukhulupilira                                                                                                       |

|     |                                                                                     |                                                                                                                                                                                                                 |
|-----|-------------------------------------------------------------------------------------|-----------------------------------------------------------------------------------------------------------------------------------------------------------------------------------------------------------------|
|     |                                                                                     | <p>9. Sindikugwirizana nazo</p> <p>10. Sindikugwirizana nazo olo pang'ono</p> <p>Sindikufuna kuyankha</p> <p>Sindikugwirizana nazo kwambiri</p> <p>88. Refuse to say</p> <p>Sindikufuna kuyankha</p>            |
| j15 | Azibambo akuyenela kunva manyazi ngati akukanika kutota                             | <p>6. Ndikugwirizana nazo kwambiri</p> <p>7. Ndikugwirizana nazo</p> <p>8. Sindikukhulupilira</p> <p>9. Sindikugwirizana nazo</p> <p>10. Sindikugwirizana nazo olo pang'ono</p> <p>88. Sindikufuna kuyankha</p> |
| j16 | Ngati mzibambo wapeleka mimba kwa mzimayi, mwanayo ndi udindo wa anthu onse a wiri. | <p>6. Ndikugwirizana nazo kwambiri</p> <p>7. Ndikugwirizana nazo</p> <p>8. Sindikukhulupilira</p> <p>9. Sindikugwirizana nazo</p> <p>10. Sindikugwirizana nazo olo pang'ono</p> <p>88. Sindikufuna kuyankha</p> |
| j17 | Nzibambo akuyenela kudziwa zomwe bwenzi lake limakonda pogonana                     | <p>6. Ndikugwirizana nazo kwambiri</p> <p>7. Ndikugwirizana nazo</p> <p>8. Sindikukhulupilira</p> <p>9. Sindikugwirizana nazo</p> <p>10. Sindikugwirizana nazo olo pang'ono</p> <p>88. Sindikufuna kuyankha</p> |
| j18 | Kutenga nawo mbali kwa a bambo ndi kofunika polela mwana                            | <p>6. Ndikugwirizana nazo kwambiri</p> <p>7. Ndikugwirizana nazo</p> <p>8. Sindikukhulupilira</p> <p>9. Sindikugwirizana nazo</p> <p>10. Sindikugwirizana nazo olo pang'ono</p> <p>88. Sindikufuna kuyankha</p> |



|                    |                                                                                                                         |                                                                                                                                                                                          |
|--------------------|-------------------------------------------------------------------------------------------------------------------------|------------------------------------------------------------------------------------------------------------------------------------------------------------------------------------------|
| j19                | Ndi zofunika kuti abambo azikhala ndi anzawo okambilana nawo mavuto awo.                                                | 6. Ndikugwirizana nazo kwambiri<br>7. Ndikugwirizana nazo<br>8. Sindikukhulupilira<br>9. Sindikugwirizana nazo<br>10. Sindikugwirizana nazo olo pang'ono<br><br>88. Sindikufuna kuyankha |
| j20                | Banja lizigwirizana limodzi ngati likufuna kukhala ndi mwana                                                            | 6. Ndikugwirizana nazo kwambiri<br>7. Ndikugwirizana nazo<br>8. Sindikukhulupilira<br>9. Sindikugwirizana nazo<br>10. Sindikugwirizana nazo olo pang'ono<br><br>88. Sindikufuna kuyankha |
| Comment            | Tafika pamapeto a kucheza kwathu. Zikomo chifukwa cha nthawi yanu. Pali chili chonse mukufuna kuwonjezera?              |                                                                                                                                                                                          |
| End Note           | Thank the participant for their time and give them transport reimbursement, if they did not come for an ART appointment |                                                                                                                                                                                          |
| Comments           | Enumerator comments                                                                                                     |                                                                                                                                                                                          |
| End of the survey! |                                                                                                                         |                                                                                                                                                                                          |

1  
2  
3 **14.7. APPENDIX G: Follow-up Survey - Male**  
4  
5

6  
7 **FOLLOW-UP SURVEY**  
8 **Identifying efficient linkages strategies for HIVST (IDEaL)**  
9 **Male**  
10  
11

12  
13  
14 **Complete this form for men who enrolled in the study 4-months ago**

15 **Date of Interview:** \_\_\_\_\_

16 **Site Code:** \_\_\_\_\_

17 **Full Name of Interviewer:** \_\_\_\_\_

18 **Participant Study ID#:** \_\_\_\_\_  
19  
20  
21

22

| #    | Question                                                                                                                      | Response                                                                                                                                                                                                                                                                                                                                                                            |
|------|-------------------------------------------------------------------------------------------------------------------------------|-------------------------------------------------------------------------------------------------------------------------------------------------------------------------------------------------------------------------------------------------------------------------------------------------------------------------------------------------------------------------------------|
| c1a  | Please think about your primary partner in the last 4 months.<br><br>Has your relationship changed in the last 4 months? How? | <input type="checkbox"/> Nothing changed (1)<br><input type="checkbox"/> Married (2)<br><input type="checkbox"/> Steady Girlfriend (3)<br><input type="checkbox"/> Moved out of the house (4)<br><input type="checkbox"/> Became an infrequent partner (5)<br><input type="checkbox"/> Separated (6)<br><input type="checkbox"/> Divorced (7)<br><input type="checkbox"/> Other (8) |
| c4a  | Have you disclosed your HIV status to this partner?                                                                           | <input type="checkbox"/> Yes (1)<br><input type="checkbox"/> No (0)                                                                                                                                                                                                                                                                                                                 |
| c5a  | Have you had any new children with this partner since we last spoke?                                                          | <input type="checkbox"/> Yes (1)<br><input type="checkbox"/> No (0)                                                                                                                                                                                                                                                                                                                 |
| c18a | Have you started ART in the past 4months?                                                                                     | <input type="checkbox"/> Yes (1)<br><input type="checkbox"/> No (0)<br><input type="checkbox"/> No, but I plan to link                                                                                                                                                                                                                                                              |

23  
24  
25  
26  
27  
28  
29  
30  
31  
32  
33  
34  
35  
36  
37  
38  
39  
40  
41  
42  
43  
44  
45  
46  
47  
48  
49  
50  
51  
52  
53  
54  
55  
56  
57  
58  
59  
60

|                                |                                                                                                                                                 |                                                                                                                         |
|--------------------------------|-------------------------------------------------------------------------------------------------------------------------------------------------|-------------------------------------------------------------------------------------------------------------------------|
| c18b                           | IF YES: When did you start ART?                                                                                                                 | <hr/> Day/Month/Year                                                                                                    |
| <b>Unintended Consequences</b> |                                                                                                                                                 |                                                                                                                         |
| c19a                           | Were unwantedly pressured to initiate ART?                                                                                                      | <input type="checkbox"/> Yes (1)<br><input type="checkbox"/> No (0)                                                     |
| c20a                           | After enrolling in the study, did anyone find out your HIV status against your will (unwanted disclosure)?                                      | <input type="checkbox"/> Yes (1)<br><input type="checkbox"/> No (0)                                                     |
| C20b                           | After enrolling in the study, did anyone find out your partners' HIV status against her will (unwanted disclosure)?                             | <input type="checkbox"/> Yes (1)<br><input type="checkbox"/> No (0)                                                     |
| c21a                           | After enrolling in the study, did your partner....<br><br>Threaten to hurt or harm you or someone you cared about.                              | <input type="checkbox"/> Yes (1)<br><input type="checkbox"/> No (0)<br><input type="checkbox"/> Refused to respond (99) |
| c22a                           | Insulted you or made you feel bad about yourself.                                                                                               | <input type="checkbox"/> Yes (1)<br><input type="checkbox"/> No (0)<br><input type="checkbox"/> Refused to respond (99) |
| c23a                           | Hit, slapped, kicked or did anything else meant to physically hurt you.                                                                         | <input type="checkbox"/> Yes (1)<br><input type="checkbox"/> No (0)<br><input type="checkbox"/> Refused to respond (99) |
| c21a                           | After enrolling in the study, did you ever do the following to your partner....<br><br>Threaten to hurt or harm her or someone she cared about. | <input type="checkbox"/> Yes (1)<br><input type="checkbox"/> No (0)<br><input type="checkbox"/> Refused to respond (99) |

|      |                                                                                                                                                                                                               |                                                                                                                                                                                                                                                                                                     |
|------|---------------------------------------------------------------------------------------------------------------------------------------------------------------------------------------------------------------|-----------------------------------------------------------------------------------------------------------------------------------------------------------------------------------------------------------------------------------------------------------------------------------------------------|
|      |                                                                                                                                                                                                               |                                                                                                                                                                                                                                                                                                     |
| c22a | Insulted her or made her feel bad about herself.                                                                                                                                                              | <input type="checkbox"/> Yes (1)<br><input type="checkbox"/> No (0)<br><input type="checkbox"/> Refused to respond (99)                                                                                                                                                                             |
| c23a | Hit, slapped, kicked or did anything else meant to physically hurt her.                                                                                                                                       | <input type="checkbox"/> Yes (1)<br><input type="checkbox"/> No (0)<br><input type="checkbox"/> Refused to respond (99)                                                                                                                                                                             |
| c24  | Slept with another woman                                                                                                                                                                                      | <input type="checkbox"/> Yes (1)<br><input type="checkbox"/> No (0)<br><input type="checkbox"/> Refused to respond (99)                                                                                                                                                                             |
| c25a | <p><i>Now, I am going to ask you a series of questions about who makes within this relationship. Please think about the last 4 months</i></p> <p>Who usually decides how the money you earn will be used?</p> | <input type="checkbox"/> Yourself (respondent)<br><input type="checkbox"/> Jointly (This partner and you together)<br><input type="checkbox"/> Mainly this partner<br><input type="checkbox"/> Someone else<br><input type="checkbox"/> Do not earn money<br><input type="checkbox"/> Refuse to say |
| c26a | Who usually decides how your partner's earnings will be used?                                                                                                                                                 | <input type="checkbox"/> Yourself (respondent)<br><input type="checkbox"/> Jointly (This partner and you together)<br><input type="checkbox"/> Mainly this partner<br><input type="checkbox"/> Someone else<br><input type="checkbox"/> Refuse to say                                               |

|      |                                                             |                                                                                                                                                                                                                                                       |
|------|-------------------------------------------------------------|-------------------------------------------------------------------------------------------------------------------------------------------------------------------------------------------------------------------------------------------------------|
| c27a | Who usually makes decisions about health care for yourself? | <input type="checkbox"/> Yourself (respondent)<br><input type="checkbox"/> Jointly (This partner and you together)<br><input type="checkbox"/> Mainly this partner<br><input type="checkbox"/> Someone else<br><input type="checkbox"/> Refuse to say |
|------|-------------------------------------------------------------|-------------------------------------------------------------------------------------------------------------------------------------------------------------------------------------------------------------------------------------------------------|

| D. Additional Questions |                                                                                            |                                                                     |
|-------------------------|--------------------------------------------------------------------------------------------|---------------------------------------------------------------------|
| #                       | Question                                                                                   | Response                                                            |
| d1                      | Would you recommend the ART intervention you were part of to other male friends or family? | <input type="checkbox"/> Yes (1)<br><input type="checkbox"/> No (0) |
| d2                      | Are you happy that you participated in the ART intervention?                               | <input type="checkbox"/> Yes (1)<br><input type="checkbox"/> No (0) |

Thank the participant for their time and end the survey

**BASELINE SURVEY**  
**Identifying efficient linkages strategies for HIVST (IDEaL)**  
 Male (Chichewa)

**Complete this form for men who enrolled in the study 4-months ago**

**Date of Interview:** \_\_\_\_\_

**Site Code:** \_\_\_\_\_

**Full Name of Interviewer:** \_\_\_\_\_

**Participant Study ID#:** \_\_\_\_\_

| #    | Question                                                                                                                                                                          | Response                                                                                                                                                                                                                                                                                                                                                                                          |
|------|-----------------------------------------------------------------------------------------------------------------------------------------------------------------------------------|---------------------------------------------------------------------------------------------------------------------------------------------------------------------------------------------------------------------------------------------------------------------------------------------------------------------------------------------------------------------------------------------------|
| c1a  | <p>Taganizani za bwenzi lanu logonana nalo lomwe lakhala lodalilika kwa miyese folo yapitayi.</p> <p>Kodi ubwenzi wanu wasintha munjira ina iliyonse mu miyezi folo yapitayi?</p> | <input type="checkbox"/> Palibe chasintha (1)<br><input type="checkbox"/> Married (2)<br><input type="checkbox"/> Chibwenzi chokhazikika (3)<br><input type="checkbox"/> Chibwenzi Chinachoka pakhomo (4)<br><input type="checkbox"/> Chibwenzi cha apo ndi apo (5)<br><input type="checkbox"/> Separated (6)<br><input type="checkbox"/> Banja linatha (7)<br><input type="checkbox"/> Other (8) |
| c4a  | Kodi munawauza abwenzi anuwa za mmene mulili mnthupi mwanu ku mbali ya HIV?                                                                                                       | <input type="checkbox"/> Eya(1)<br><input type="checkbox"/> Ayi(0)                                                                                                                                                                                                                                                                                                                                |
| c5a  | Kodi mwakhala ndi ana ndi abwenzi anuwa kuchokera ulendo watha tinayankhulana?                                                                                                    | <input type="checkbox"/> Eya(1)<br><input type="checkbox"/> Ayi(0)                                                                                                                                                                                                                                                                                                                                |
| c18a | Kodi munayamba kumwa mankhwala a ma ARV mu miyezi folo yapitayi?                                                                                                                  | <input type="checkbox"/> Eya(1)<br><input type="checkbox"/> Ayi(2)<br><input type="checkbox"/> Ayi, ndikulingalira zoyamba (3)                                                                                                                                                                                                                                                                    |

|                                |                                                                                                                                                                |                                                                                                                        |
|--------------------------------|----------------------------------------------------------------------------------------------------------------------------------------------------------------|------------------------------------------------------------------------------------------------------------------------|
| c18b                           | Ngati eya: Munayamba liti mankwala a ma ARV?                                                                                                                   | <hr/> Tsiku/Mwezi/Chaka                                                                                                |
| <b>Unintended Consequences</b> |                                                                                                                                                                |                                                                                                                        |
| c19a                           | Munayamba kumwa mankhwala a ma ARV mokakamizidwa?                                                                                                              | <input type="checkbox"/> Eya(1)<br><input type="checkbox"/> Ayi(0)                                                     |
| c20a                           | Chilowereni mu study, alipo omwe anadziwa za m'mene mulili mnthupi mwanu kumbari ya HIV inu musakufuna? (Kuwulula za HIV mosafuna)                             | <input type="checkbox"/> Eya(1)<br><input type="checkbox"/> Ayi(0)                                                     |
| C20b                           | Chilowereni mu study, alipo omwe anadziwa za m'mene mulili mnthupi mwa bwenzi lanu kumbari ya HIV eni asakufuna? (Kuwulula za HIV mosafuna)                    | <input type="checkbox"/> Eya(1)<br><input type="checkbox"/> Ayi(0)                                                     |
| c21a                           | Chilowereni mu study, kodi bwenzi lanu.....<br><br>Linaospyeza kuvulaza inu kapena wina aliyense amane mumamukonda?                                            | <input type="checkbox"/> Eya(1)<br><input type="checkbox"/> Ayi(0)<br><input type="checkbox"/> Refused to respond (99) |
| c22a                           | Linakunyoza kapena kukunyogodolani                                                                                                                             | <input type="checkbox"/> Eya(1)<br><input type="checkbox"/> Ayi(0)<br><input type="checkbox"/> Refused to respond (99) |
| c23a                           | Anakumenyani ndikukupwetekani.                                                                                                                                 | <input type="checkbox"/> Eya(1)<br><input type="checkbox"/> Ayi(0)<br><input type="checkbox"/> Refused to respond (99) |
| c21a                           | Chilowereni mu study kodi munayamba mwapangapo zotsatirazi kwa bwenzi anu....<br><br>Kuosyeza kuti muvulaza bwenzi lanu kapena wina aliyense yemwe amamukonda. | <input type="checkbox"/> Eya(1)<br><input type="checkbox"/> Ayi(0)<br><input type="checkbox"/> Refused to respond (99) |

|      |                                                                                                                                                                         |                                                                                                                                                                                                                                                                 |
|------|-------------------------------------------------------------------------------------------------------------------------------------------------------------------------|-----------------------------------------------------------------------------------------------------------------------------------------------------------------------------------------------------------------------------------------------------------------|
| c22a | Kunyoza kapenanso kumupangitsa kuti azizikayikila.                                                                                                                      | <input type="checkbox"/> Eya(1)<br><input type="checkbox"/> Ayi(0)<br><input type="checkbox"/> Refused to respond (99)                                                                                                                                          |
| c23a | Kumumenya ndikumupweteka.                                                                                                                                               | <input type="checkbox"/> Eya(1)<br><input type="checkbox"/> Ayi(0)<br><input type="checkbox"/> Refused to respond (99)                                                                                                                                          |
| c24  | Kuchita mchitidwe ogonana ndi mzimayi wina                                                                                                                              | <input type="checkbox"/> Eya(1)<br><input type="checkbox"/> Ayi(0)<br><input type="checkbox"/> Refused to respond (99)                                                                                                                                          |
| c25a | <p>Tsopano ndikufunsani mafunso okhuzana ndi omwe amalamula pakhomo panu.</p> <p>Kodi amalamula za mmene ndalama zomwe mwapeza zitagwilitsidwile ntchito ndi ndani?</p> | <input type="checkbox"/> Amene akuyankha<br><input type="checkbox"/> Mogwirizana<br><input type="checkbox"/> Nthawi zambiri bwenzi<br><input type="checkbox"/> Munthu wina<br><input type="checkbox"/> Sapeza ndalama<br><input type="checkbox"/> Refuse to say |
| c26a | Kodi amalamulila za mmene ndalama za abwenzu anu zingagwilitsidwile ntchito ndi ndani?                                                                                  | <input type="checkbox"/> Amene akuyankha<br><input type="checkbox"/> Mogwirizana<br><input type="checkbox"/> Nthawi zambiri bwenzi<br><input type="checkbox"/> Munthu wina<br><input type="checkbox"/> Refuse to say                                            |
| c27a | Kodi amene amakhala ndi ulamulilo pa chisamalilo cha moyo wanu ndi ndani?                                                                                               | <input type="checkbox"/> Amene akuyankha<br><input type="checkbox"/> Mogwirizana<br><input type="checkbox"/> Nthawi zambiri bwenzi<br><input type="checkbox"/> Munthu wina<br><input type="checkbox"/> Refuse to say                                            |



| Additional Questions |                                                                                                                   |                                                                    |
|----------------------|-------------------------------------------------------------------------------------------------------------------|--------------------------------------------------------------------|
| d1                   | Kodi mungalimbikitse anzanu ena achizibambo kapena apabanja panu kutenga nawo mbali mu ART intervention munaliyi? | <input type="checkbox"/> Eya(1)<br><input type="checkbox"/> Ayi(0) |
| d2                   | Kodi muli okondwa kuti munatenga nawo mbali mu ART intervention?                                                  | <input type="checkbox"/> Eya(1)<br><input type="checkbox"/> Ayi(0) |

1  
2  
3  
4  
5 **14.8. APPENDIX H: Follow-up Survey – Female**  
6  
7

8  
9 **FOLLOW-UP SURVEY**  
10 **Identifying efficient linkages strategies for HIVST (IDEaL)**  
11 **Female**  
12  
13

14  
15  
16 **Complete this form for women whose:**

17 **(1) Partners consented to be in the study 4-months ago**

18 **Date of Interview:** \_\_\_\_\_

19 **Site Code:** \_\_\_\_\_

20 **Full Name of Interviewer:** \_\_\_\_\_

21 **Participant Study ID#:** \_\_\_\_\_

22  
23  
24  
25

| #    | Question                                                                                                                      | Response                                                                                                                                                                                                                                                                                                                                                                           |
|------|-------------------------------------------------------------------------------------------------------------------------------|------------------------------------------------------------------------------------------------------------------------------------------------------------------------------------------------------------------------------------------------------------------------------------------------------------------------------------------------------------------------------------|
| c1a  | Please think about your primary partner in the last 4 months.<br><br>Has your relationship changed in the last 4 months? How? | <input type="checkbox"/> Nothing changed (1)<br><input type="checkbox"/> Married (2)<br><input type="checkbox"/> Steady Boyfriend (3)<br><input type="checkbox"/> Moved out of the house (4)<br><input type="checkbox"/> Became an infrequent partner (5)<br><input type="checkbox"/> Separated (6)<br><input type="checkbox"/> Divorced (7)<br><input type="checkbox"/> Other (8) |
| c4a  | Have you disclosed your HIV status to this partner?                                                                           | <input type="checkbox"/> Yes (1)<br><input type="checkbox"/> No (0)                                                                                                                                                                                                                                                                                                                |
| c5a  | Have you had any new children with this partner since we last spoke?                                                          | <input type="checkbox"/> Yes (1)<br><input type="checkbox"/> No (0)                                                                                                                                                                                                                                                                                                                |
| c18a | To your knowledge, did your partner start ART?                                                                                | <input type="checkbox"/> Yes (1)<br><input type="checkbox"/> No, they do not plan to link (2)<br><input type="checkbox"/> No, but they plan to link (3)                                                                                                                                                                                                                            |

26  
27  
28  
29  
30  
31  
32  
33  
34  
35  
36  
37  
38  
39  
40  
41  
42  
43  
44  
45  
46  
47  
48  
49  
50  
51  
52  
53  
54  
55  
56  
57  
58  
59  
60

|                                |                                                                                                                     |                                                                                                                         |
|--------------------------------|---------------------------------------------------------------------------------------------------------------------|-------------------------------------------------------------------------------------------------------------------------|
|                                |                                                                                                                     | <input type="checkbox"/> Unsure (88)                                                                                    |
| <b>Unintended Consequences</b> |                                                                                                                     |                                                                                                                         |
| c19a                           | Did you pressure your partner to initiate ART?                                                                      | <input type="checkbox"/> Yes (1)<br><input type="checkbox"/> No (0)                                                     |
| c20a                           | After enrolling in the study, did anyone find out your HIV status against your will (unwanted disclosure)?          | <input type="checkbox"/> Yes (1)<br><input type="checkbox"/> No (0)                                                     |
| C20b                           | After enrolling in the study, did anyone find out your partners' HIV status against his will (unwanted disclosure)? | <input type="checkbox"/> Yes (1)<br><input type="checkbox"/> No (0)                                                     |
| c21a                           | After enrolling in the study, did your partner....<br><br>Threaten to hurt or harm you or someone you cared about.  | <input type="checkbox"/> Yes (1)<br><input type="checkbox"/> No (0)<br><input type="checkbox"/> Refused to respond (99) |
| c22a                           | Insulted you or made you feel bad about yourself.                                                                   | <input type="checkbox"/> Yes (1)<br><input type="checkbox"/> No (0)<br><input type="checkbox"/> Refused to respond (99) |
| c23a                           | Hit, slapped, kicked or did anything else meant to physically hurt you.                                             | <input type="checkbox"/> Yes (1)<br><input type="checkbox"/> No (0)<br><input type="checkbox"/> Refused to respond (99) |
| C23b                           | Forced sexual intercourse and other forms of sexual coercion                                                        | <input type="checkbox"/> Yes (1)<br><input type="checkbox"/> No (0)<br><input type="checkbox"/> Refused to respond (99) |

|      |                                                                                                                                                                         |                                                                                                                                                                                                                                                                                                     |
|------|-------------------------------------------------------------------------------------------------------------------------------------------------------------------------|-----------------------------------------------------------------------------------------------------------------------------------------------------------------------------------------------------------------------------------------------------------------------------------------------------|
| C23c | Slept with another woman.                                                                                                                                               | <input type="checkbox"/> Yes (1)<br><input type="checkbox"/> No (0)<br><input type="checkbox"/> Refused to respond (99)                                                                                                                                                                             |
| c24a | Ended the relationship                                                                                                                                                  | <input type="checkbox"/> Yes (1)<br><input type="checkbox"/> No (0)<br><input type="checkbox"/> Refused to respond (99)                                                                                                                                                                             |
| c25a | <p><i>Now, I am going to ask you a series of questions about who makes within this relationship</i></p> <p>Who usually decides how the money you earn will be used?</p> | <input type="checkbox"/> Yourself (respondent)<br><input type="checkbox"/> Jointly (This partner and you together)<br><input type="checkbox"/> Mainly this partner<br><input type="checkbox"/> Someone else<br><input type="checkbox"/> Do not earn money<br><input type="checkbox"/> Refuse to say |
| c26a | Who usually decides how your partner's earnings will be used?                                                                                                           | <input type="checkbox"/> Yourself (respondent)<br><input type="checkbox"/> Jointly (This partner and you together)<br><input type="checkbox"/> Mainly this partner<br><input type="checkbox"/> Someone else<br><input type="checkbox"/> Refuse to say                                               |
| c27a | Who usually makes decisions about health care for yourself?                                                                                                             | <input type="checkbox"/> Yourself (respondent)<br><input type="checkbox"/> Jointly (This partner and you together)<br><input type="checkbox"/> Mainly this partner<br><input type="checkbox"/> Someone else<br><input type="checkbox"/> Refuse to say                                               |

| Additional Questions |                                                                           |                                                                     |
|----------------------|---------------------------------------------------------------------------|---------------------------------------------------------------------|
| d1                   | Would you recommend the ART intervention to other male friends or family? | <input type="checkbox"/> Yes (1)<br><input type="checkbox"/> No (0) |
| d2                   | Are you happy your partner was in the ART intervention?                   | <input type="checkbox"/> Yes (1)<br><input type="checkbox"/> No (0) |

Thank the participant for their time and end the survey

**FOLLOW-UP SURVEY**  
**Identifying efficient linkages strategies for HIVST (IDEaL)**  
 Female (Chichewa)

**Complete this form for women whose:**

**(1) Partners consented to be in the study 4-months ago**

**Date of Interview:** \_\_\_\_\_

**Site Code:** \_\_\_\_\_

**Full Name of Interviewer:** \_\_\_\_\_

**Participant Study ID#:** \_\_\_\_\_

| #    | Question                                                                                                                                                                                                    | Response                                                                                                                                                                                                                                                                                                                                                                                      |
|------|-------------------------------------------------------------------------------------------------------------------------------------------------------------------------------------------------------------|-----------------------------------------------------------------------------------------------------------------------------------------------------------------------------------------------------------------------------------------------------------------------------------------------------------------------------------------------------------------------------------------------|
| c1a  | <p>Taganizani za bwenzi lanu logonana nalo lomwe lakhala lodalilika kwa miyesi folo yapitayi.</p> <p>Kodi ubwenzi wanu wasintha munjira ina iliyonse mu miyezi folo yapitayi?</p> <p>Bwenzi lokhazikika</p> | <input type="checkbox"/> Palibe chasintha (1)<br><input type="checkbox"/> Married (2)<br><input type="checkbox"/> Bwenzi lokhazikika (3)<br><input type="checkbox"/> Chibwenzi Chinachoka pakhomo (4)<br><input type="checkbox"/> Chibwenzi cha apo ndi apo (5)<br><input type="checkbox"/> Separated (6)<br><input type="checkbox"/> Banja linatha (7)<br><input type="checkbox"/> Other (8) |
| c4a  | Kodi munawauza abwenzi anuwa za mmene mulili mnthupi mwanu ku mbali ya HIV?                                                                                                                                 | <input type="checkbox"/> Eya(1)<br><input type="checkbox"/> Ayi(0)                                                                                                                                                                                                                                                                                                                            |
| c5a  | <p>Have you had any new children with this partner since we last spoke?</p> <p>Kodi mwakhala ndi ana ndi abwenzi anuwa kuchokera ulendo watha tinayankhulana?</p>                                           | <input type="checkbox"/> Eya(1)<br><input type="checkbox"/> Ayi(0)                                                                                                                                                                                                                                                                                                                            |
| c18a | Mongamukudziwira, kodi bwenzi lanu linayamba kumwa mwankhala a ama ARV?                                                                                                                                     | <input type="checkbox"/> Eya<br><input type="checkbox"/> Ayi, sakulingalira zoyamba kumwa mwankhwala a ma ARV<br><input type="checkbox"/> Ayi, koma                                                                                                                                                                                                                                           |

|                                |                                                                                                                                             |                                                                                                                        |
|--------------------------------|---------------------------------------------------------------------------------------------------------------------------------------------|------------------------------------------------------------------------------------------------------------------------|
|                                |                                                                                                                                             | akulingalira zoyamba<br><input type="checkbox"/> Unsure (88)                                                           |
| <b>Unintended Consequences</b> |                                                                                                                                             |                                                                                                                        |
| c19a                           | Kodi munawakakamiza a bwenzi anu kuti ayambe kumwa mankhwala a ama ARV?                                                                     | <input type="checkbox"/> Eya(1)<br><input type="checkbox"/> Ayi(0)                                                     |
| c20a                           | Chilowereni mu study, alipo omwe anadziwa za m'mene mulili mnthupi mwanu kumbari ya HIV inu musakufuna? (Kuwulula za HIV mosafuna)          | <input type="checkbox"/> Eya(1)<br><input type="checkbox"/> Ayi(0)                                                     |
| C20b                           | Chilowereni mu study, alipo omwe anadziwa za m'mene mulili mnthupi mwa bwenzi lanu kumbari ya HIV eni asakufuna? (Kuwulula za HIV mosafuna) | <input type="checkbox"/> Eya(1)<br><input type="checkbox"/> Ayi(0)                                                     |
| c21a                           | Chilowereni mu study, kodi bwenzi lanu.....<br><br>Linaospyeza kuvulaza inu kapena wina aliyense amane mumamukonda?                         | <input type="checkbox"/> Eya(1)<br><input type="checkbox"/> Ayi(0)<br><input type="checkbox"/> Refused to respond (99) |
| c22a                           | Anakunyoza kapenanso kukupangitsani kuti muzizikayikila.                                                                                    | <input type="checkbox"/> Eya(1)<br><input type="checkbox"/> Ayi(0)<br><input type="checkbox"/> Refused to respond (99) |
| c23a                           | Anakumenyani ndikukupwetekani.                                                                                                              | <input type="checkbox"/> Eya(1)<br><input type="checkbox"/> Ayi(0)<br><input type="checkbox"/> Refused to respond (99) |
| C23b                           | Kukukakamizani kugonana ndi zinthu zina?                                                                                                    | <input type="checkbox"/> Eya(1)<br><input type="checkbox"/> Ayi(0)<br><input type="checkbox"/> Refused to respond (99) |
| C23c                           | Kuchita mtchitidwe ogonana ndi mzimayi wina                                                                                                 | <input type="checkbox"/> Eya(1)<br><input type="checkbox"/> Ayi(0)                                                     |

|      |                                                                                                                                                                  |                                                                                                                                                                                                                      |
|------|------------------------------------------------------------------------------------------------------------------------------------------------------------------|----------------------------------------------------------------------------------------------------------------------------------------------------------------------------------------------------------------------|
|      |                                                                                                                                                                  | <input type="checkbox"/> Refused to respond (99)                                                                                                                                                                     |
| c24a | Kuthetsa Chibwenzi                                                                                                                                               | <input type="checkbox"/> Eya(1)<br><input type="checkbox"/> Ayi(0)<br><input type="checkbox"/> Refused to respond (99)                                                                                               |
| c25a | Tsopano ndikufunsani mafunso okhuzana ndi omwe amalamula pakhomo panu.<br><br>Kodi amalamula za mmene ndalama zomwe mwapeza zitagwilitsidwile ntchito ndi ndani? | <input type="checkbox"/> Amene akuyankha<br><input type="checkbox"/> Mogwirizana<br><input type="checkbox"/> Nthawi zambiri bwenzi<br><input type="checkbox"/> Munthu wina<br><input type="checkbox"/> Refuse to say |
| c26a | Kodi amalamulila za mmene ndalama za abwenzi anu zingagwilitsidwile ntchito ndi ndani?                                                                           | <input type="checkbox"/> Amene akuyankha<br><input type="checkbox"/> Mogwirizana<br><input type="checkbox"/> Nthawi zambiri bwenzi<br><input type="checkbox"/> Munthu wina<br><input type="checkbox"/> Refuse to say |
| c27a | Kodi amene amakhala ndi ulamulilo pa chisamalilo cha moyo wanu ndi ndani?                                                                                        | <input type="checkbox"/> Amene akuyankha<br><input type="checkbox"/> Mogwirizana<br><input type="checkbox"/> Nthawi zambiri bwenzi<br><input type="checkbox"/> Munthu wina<br><input type="checkbox"/> Refuse to say |

| Additional Questions |                                                                                                                   |                                                                    |
|----------------------|-------------------------------------------------------------------------------------------------------------------|--------------------------------------------------------------------|
| d1                   | Kodi mungalimbikitse anzanu ena achizibambo kapena apabanja panu kutenga nawo mbali mu ART intervention munaliyi? | <input type="checkbox"/> Eya(1)<br><input type="checkbox"/> Ayi(0) |
| d2                   | Kodi muli okondwa kuti munatenga nawo mbali mu ART intervention?                                                  | <input type="checkbox"/> Eya(1)<br><input type="checkbox"/> Ayi(0) |



## 14.9. APPENDIX I: Data Extraction Tool

---

### DATA EXTRACTION TOOL

#### Identifying efficient linkages strategies for HIVST (IDEaL)

English only

---

#### **INSTRUCTIONS:**

The Medical Chart Review will be used to link the male study participant with the facilities ART records and to document their facility visits over the 4-months of study participation. Please follow the instructions to prepare for data collection (1) gather all ART registers that were active between DAY MONTH YEAR up to today (2) enter and re-enter the participant ID's who have reached the 4-month follow up period into the tablet (3) once you have re-entered, the tablet will provide you with identifying information about the male study participant. (5) match the participants information with information provided by the ART register to see if the participant initiated ART or not. If a participant did not initiate care (i.e. you cannot find him in the ART register), still enter the initial data points and indicate that the participant did not

| Code     | Question                        | Responses                                                                                                                                                                                                                                                                                                                                                                                                                                       |
|----------|---------------------------------|-------------------------------------------------------------------------------------------------------------------------------------------------------------------------------------------------------------------------------------------------------------------------------------------------------------------------------------------------------------------------------------------------------------------------------------------------|
| pid      | Please enter the Participant ID |                                                                                                                                                                                                                                                                                                                                                                                                                                                 |
| district | District                        | <input type="checkbox"/> Chickwawa<br><input type="checkbox"/> Nkhotakota<br><input type="checkbox"/> Lilongwe<br><input type="checkbox"/> Kasungu                                                                                                                                                                                                                                                                                              |
| site     | Facility name                   | <input type="checkbox"/> Chickwawa District Hospital<br><input type="checkbox"/> St. Montford Mission Hospital<br><input type="checkbox"/> Kalemba Community Hospital<br><input type="checkbox"/> Kasungu District Hospital<br><input type="checkbox"/> Nkhoma Community Hospital<br><input type="checkbox"/> Mponela Rural Hospital<br><input type="checkbox"/> Deayang Luke Hospital<br><input type="checkbox"/> Nkhotakota District Hospital |

|            |                                                                                                                                                                                                                                                                                                                                                                                                                                                                                                                                                                                                                                                             |                                                                                                             |
|------------|-------------------------------------------------------------------------------------------------------------------------------------------------------------------------------------------------------------------------------------------------------------------------------------------------------------------------------------------------------------------------------------------------------------------------------------------------------------------------------------------------------------------------------------------------------------------------------------------------------------------------------------------------------------|-------------------------------------------------------------------------------------------------------------|
|            |                                                                                                                                                                                                                                                                                                                                                                                                                                                                                                                                                                                                                                                             | <input type="checkbox"/> Nsanje District Hospital<br><input type="checkbox"/> Ngabu Rural Hospital          |
|            | <p><i>We want to know if this participant initiated ART. Please look at the ART register used at the clinic between DATE MONTH YEAR up to today</i></p> <p><i>Instructions: Look for the below information in the ART register, matching the below participant with a name in the ART register.</i></p> <p><i>Sometimes it is hard to find an exact match in the ART register. Consider it a match if 3 of the 4 data points match. For example, someone's name may be different, but the age, and village/residence matches. Consider this the same person.</i></p> <p><i>CLIENT NAME:</i></p> <p><i>AGE:</i></p> <p><i>Ta:</i></p> <p><i>Village:</i></p> |                                                                                                             |
| found_art  | Was the participant found in the ART register?                                                                                                                                                                                                                                                                                                                                                                                                                                                                                                                                                                                                              | <input type="checkbox"/> Yes (1) – proceed to next question<br><input type="checkbox"/> No (0) – end survey |
| art_number | What is the participant assigned ART number?                                                                                                                                                                                                                                                                                                                                                                                                                                                                                                                                                                                                                |                                                                                                             |
| art_date   | What is the clients ART start date?                                                                                                                                                                                                                                                                                                                                                                                                                                                                                                                                                                                                                         | <p>____/____/____</p> <p>Day    Month    Year</p>                                                           |

|                      |                                                                                                        |                                                                                                             |
|----------------------|--------------------------------------------------------------------------------------------------------|-------------------------------------------------------------------------------------------------------------|
|                      | <i>Use the ART number to find the paper Mastercard OR look up the participant in the Baobab system</i> |                                                                                                             |
| mastercard_fo<br>und | Did you find the mastercard/baobab record?                                                             | <input type="checkbox"/> Yes (1) – proceed to next question<br><input type="checkbox"/> No (0) – end survey |
| tb                   | At initiation: TB                                                                                      | <input type="checkbox"/> Yes (1)<br><input type="checkbox"/> No (0)                                         |
| ks                   | At initiation: KS                                                                                      | <input type="checkbox"/> Yes (1)<br><input type="checkbox"/> No (0)                                         |
| pillcount            | Number of pills given                                                                                  |                                                                                                             |
| nextapp_date         | Date of next appointment                                                                               | ____ / ____ / ____<br>Day    Month    Year                                                                  |
| nextconsult_d<br>ate | Date of next consultation visit                                                                        | ____ / ____ / ____<br>Day    Month    Year                                                                  |

**END OF SURVEY**

## 14.10. APPENDIX J: In-Depth Interview Guide – Female

---

### IN-DEPTH INTERVIEW GUIDE

#### Identifying efficient linkages strategies for HIVST (IDEaL)

#### Female

---

#### BEGIN RECORDING

Original Study ID: \_\_\_\_\_

Repeat Original Study ID: \_\_\_\_\_

State if male or female respondent \_\_\_\_\_

Health Facility: \_\_\_\_\_

Date of Interview: \_\_\_\_\_

Full Name of Interviewer: \_\_\_\_\_

District where respondent Lives: \_\_\_\_\_

#### Open- Ended Questions

*Note: The in-depth interview will be open-ended and guided by the respondent's answers. This outline reflects a general guide for the in-depth interviews.*

*The interviews are meant to help us understand barriers and facilitators to ART initiation. We are also interested in their thoughts on new interventions we are developing to help men start ART. The following questions are meant to guide interviewers. Actual questions asked during the interview will vary based on participant responses.*

#### DEMOGRAPHICS:

Demographics on the female participant not collected. Already in the original study. Just make sure the Original Study ID is documented correctly.

1. What type of job/work does your partner do?
  - a. If he does not work, why?
  - b. Does he do anything else to earn money?
2. What time of day/week is your partner usually busy?
3. Where does he spend most of his time when he is not working?
  - a. *Probe: At the bar, watching football, at church, at home...*
4. How long have you been in a relationship with your sexual partner (whom you gave the HIVST kit to)

**HIV TESTING:**

Now I'd like to talk to you about you and your partner's experience with HIV services

- 1) To your knowledge, has your partner tested for HIV before you gave him the HIV-self testing kit?
  - a) IF YES, did he tell you the result? What was his result?
  - b) IF HIV+: At that time, did he start ART? IF NO: Why not?
- 2) Think about when you gave the HIV self-test kit to your sexual partner (show the kit).
  - a) How did your partner feel about his HIV positive test result? How did the result affect him?
  - b) How did you feel after your partner received an HIV positive status on the HIV self-test kit? How did the result affect you?
  - c) Did your relationship change at all after he received an HIV-positive status? How?
  - d) Did he talk to anyone about it?/ who?
  - e) Did he disclose to anyone besides you? Why/why not?

**ART UPTAKE:**

- 1) After he tested HIV-positive, did he initiate ART? Why/Why not?
  - a) IF INITIATED ART: How long did it take him to initiate ART? (several weeks, several months?). Why did you initiate ART so quickly/slowly? /

We know starting ART is difficult.

- 1) What do you think is the most difficult thing about starting ART for your partner right now?
  - a) Do you think this is the same for men and for women? How is it different?
  - b) How does taking ART affect one's daily activities? (schedule/routine) In bad ways? In good ways? Is it different for men? How?
  - c) How does taking ART affect relationships? In bad ways? In good ways? Is it different for men? How?
  - d) Out of all these things you mentioned, what do you think is the biggest concern/problem for your partner?

**FOR MEN WHO ARE CONSIDERED LOSS-TO-FOLLOW UP**

1. Since we saw you last, we haven't been able to follow up with your partner. From your perspective, why do you think this is?
2. Since your partner was enrolled in our study, what kind of things did you notice or did he mention to you related to HIV health services?
  - a. *Probe: phone calls/SMS or speak one-on-one to a health care worker? Was your partner visited by a health care professional within your home or in the community?*
3. Has your partner mentioned any of these interactions to anyone?
  - a. *Probe: friends, family, community members*
4. How did your partner react to these things? Did he like/dislike them? What did he do when they happened?
  - a. *Probe: phone call, SMS, in-person visit, home-based ART*
5. How did you react to these things? Did you like/dislike them?
  - a. *Probe: Was there any reaction amongst your family, friends or the community to these things?*
  - b. *If so, how did this affect your partner and/or you?*

**SUGGESTIONS FOR ART SERVICES**

Thank you for all the information. We would like to develop ART services that meet the needs of individuals in your community. We understand that men may face different challenges than women. I would like to know your opinion about what is needed in order to make ART services easy to access and use.

- 1) Could you describe the ideal way ART services would be given to your partner? If the clinic could do anything ...
  - a) When would he want to pick up ART?
    - i) Probe: day of week, time of day?
    - ii) *Why do you say this?*
  - b) Where would he want to pick up ART?
    - i) Probe: clinic near you, clinic far from you, somewhere in the community (WHERE SPECIFICALLY), at your home?
    - ii) *Why do you say this?*
- 2) Do you think your partner needs more HIV-related information? About the benefits of ART, how to keep his status a secret, or how to disclose his status, about other aspects of his health?
  - a) IF YES: How would he want to get this information? In person (one on one, pamphlet, radio, phone call, ...)
  - i) Probe: IF YES: WHO would he like to talk to about this information? (Provider, expert client, other community member)
- 3) Does he need support? For example, reminders to go to the health facility, someone to talk to regularly about what he is going through with ART, help disclosing his status, anything else).
  - a) *Probe: IF YES: How would he want to get this support? In person (one on one, pamphlet, radio, phone call)*
  - b) *Probe: IF YES: WHO would he like to talk to about this support? (Provider, expert client, other community member)*
- 4) Out of time of pick up, location, more information, or more support, what are the most important factors for your partner to use ART services?
  - a) *PROBE: Think about other males. What do you think they would say is the most important factor for men to use ART services?*

## **SPECIFIC SUGGESTIONS ON CURRENT INTERVENTIONS**

### **FOR MEN WHO ARE CONSIDERED LOSS-TO-FOLLOW UP**

1. As discussed earlier, your partner received [phone calls, texts, in person counseling, home-based ART].
  - a. *Do you feel that this was enough to encourage him to start ART?*
    - i. *If NO, what would you have done differently? (frequency, content, location)*
    - ii. *If YES, why do you think they were sufficient?*
  - b. Are there any other ideas/services we should think about doing beside the ones we just talked about (appointment reminders, in-depth counseling, community/home ART)?/
    - i. PROBE: What is it?
    - ii. Why do you think this could work?

## CONCLUSION

Thank you for your time.

1. Is there anything else you would like to say about men's use of ART?
2. Is there anything else you would like to say about your own use of ART and how we can help make your experience better?

**STOP THE RECORDER AND MAKE SURE RECORDING IS SAVED.**

**THANK YOU FOR YOUR PARTICIPATION IN THIS INTERVIEW. LET ME ENCOURAGE YOU THAT ARVS CAN HELP YOU LIVE LONG AND HEALTHY.**

*The following general education messages should be conveyed to all male and female participants:*

- All people who have been tested HIV positive should start ART as soon as possible for their own health and to prevent passing the virus on to others.
- Serious diseases can occur even in patients with high CD4 count (>500), without any previous symptoms. Immediate ART greatly reduces this risk.
- People that start ART and continue lifelong without interruptions can remain healthy and live as long as people without HIV.
- Even though you may not feel sick, ART is still important to keep you healthy for the rest of your life.
- ART reduces the amount of virus in your body and therefore can reduce the chance that HIV is passed to your sex partners.
- Current ART regimens are easy to take and rarely cause serious side-effects. Some people have side effects in the first few weeks of treatment and these almost always go away. IF there are persistent side effects, an alternative HIV regimen can be given.

*NOTE: Be careful not to give any specific medical advice but rather refer respondents back to the clinic to speak to a provider.*

---

**IN-DEPTH INTERVIEW GUIDE**  
**Identifying efficient linkages strategies for HIVST (IDEaL)**  
 Female (Chichewa)

---

**BEGIN RECORDING**

Original Study ID: \_\_\_\_\_

Repeat Original Study ID: \_\_\_\_\_

State if male or female respondent \_\_\_\_\_

Health Facility: \_\_\_\_\_

Date of Interview: \_\_\_\_\_

Full Name of Interviewer: \_\_\_\_\_

District where respondent Lives: \_\_\_\_\_

**Demographics**

- 1) Kodi bwenzi lanu limagwira ntchito yanji kuti apeze ndalama?
  - a) Ngati sagwira ntchito ndi chifukwa chani?
  - b) Kodi amapanga zinthu zina zothandizira kupeza ndalama?
- 2) Kodi nthawi ndi nthawi iti ya tsiku/sabata lomwe bwenzi lanu limakhala lotanganidwa?
- 3) Kodi nthawi yawo yambiri amakhala ali kuti ngati sakugwira ntchito?
- 4) Kodi mwakhala pa ubwenzi kwa nthawi yayitali bwanji ndi bwenzi lanu logonana nalo (lomwe munalipitsa ka chida koziyezela wekha HIV)

**HIV-Testing**

Pano ndimafuna ndikufunsi mafunso okhudzana ndi zomwe mwakumanapo nazo zokhudza thandizo la HIV.

1. Momwe mukudziwira kodi bwenzi lanu linayamba layezetsapo HIV musanawapatse kachida koziyeza wekha HIV?
  - a. Ngati eya, anakuwuzani zotsatira? Zotsatira zawo zinali zotani?
  - b. Ngati anapezeka ndi HIV nthawi imeneyo, anayamba kumwa ma ARV? Ngati ayi chifukwa chani?
2. Ganizirani nthawi yomwe mudapereka kachipangizo kodziyezera wekha HIV (awonetseni) kwa bwenzi lanu.
  - a. Kodi bwenzi lanu linanva bwanji atadziwa za zotsatira zawo za HIV? Zotsatirazo anzilandira bwanji?
  - b. Kodi munamva bwanji bwenzi lanu litalandira zotsatira zoti lili ndi kachilombo ka HIV



- pa kachipangizoka? Izi zinakukhudzani bwanji?
- c. Kodi ubwenzi wanu udasintha atalandira zotsatira zoti ali ndi kachilombo? Motani?
  - d. Kodi analankhulapo ndi wina aliyense? Mosatchula dzina, ndani?
  - e. Kodi anawuzapo wina aliyense za mthupi mwake kupatula inu? Chifukwa chani?

## ART Uptake

- 1) Atadziyeza ndi kupeza kuti ali ndi kachilombo, kodi adakayamba kumwa mankhwala? Chifukwa?
  - a) Kodi zinatenga nthawi yaitali bwanji asanayambe kumwa mankhwala a ma ARV? (masabata angapo, miyezi ingapo?) Kodi anayamba kumwa mankhwala mnsanga/mochedwa chifukwa chani?
- 2) Tikudziwa kuti kuyamba kumwa mankhwala a ARV kumavutirapo. Kodi mukuona kuti chovuta chachikulu pa kuyamba kumwa mankhwala ndi chani?
  - a) Kodi mukuganiza kuti izi ndi zofanana kwa amuna ndi akazi? Nzosiyanana chifukwa chani?
  - b) Kodi kumwa mankhwala a ma ARV kumakhudza bwanji kagwiridwe ka ntchito ka munthu tsiku ndi tsiku (ntchito zomwe amagwiragwira) Mu njira yabwino kapena yobwera mmbuyo? Ndi zosiyanana kwa amuna? Motani?
  - c) Kodi kumwa mankhwala a ma ARV kumakhudza bwanji mwaubwenzi? Mu njira yabwino kapena yobwera mmbuyo? Ndi zosiyanana kwa amuna? Motani?
  - d) Pa zinthu zonse zomwe tambambikalana, mukuona kuti vuto lalikuru kwa bwenzi lanu ndi chani?

## FOR MEN WHO ARE CONSIDERED LOSS-TO-FOLLOW UP

- 1) Chiwonelaneni ulendo watha, talephela kuonananso ndi bwenzi lanu. Mumaganizo anu mukuona kuti zili motere chifukwa chani?
- 2) *Chilowereni cha bwenzi lanu mu study, mwaonako zinthu zotani kapena zomwe atchulako zokhudzana ndi thandizo la HIV?*
  - a) *Funsitsani: Lamya ya m'manja/uthenga wa pa lamya kapena kuyankhula ndi wazaumoyo? Kodi bwenzi lanu linayendeledwapo ndi wazaumoyo mu dela lanu kapena pafupi ndi nyumba yanu?*
- 3) Kodi bwenzi lanu lathculako mikumano iyi kwa wina aliyense?
  - a) *Funsitsani: Anzawo, achibale, anthu a mudela*
- 4) Kodi bwenzi lanu linapangapo chani pa zinthu izi? Anazikonda/sana zikonde? Anapanga chani zitachitika?
  - a) *Funsitsani: Lamya ya m'manja/uthenga wa pa lamya, kupita okha, thandizo la ARV lapakhomo*
- 5) Munanva bwanji kuzinthuzi? Munazikonda/simunazikonde?
  - a) *Achibale anapanga chilichonse, anzanu, anthu a mudela ku zinthu zimenezi?*
  - b) *Ngati zili choncho, izi zinawatani a bwenzi anu /inuyo*

## SUGGESTIONS FOR ART SERVICES

Zikomo chifukwa cha mayankho anu. Timafuna titakhazikitsa ndondomeko zokomera anthu mu dera lanu pokhudza thandizo la ma ARV. Tikudziwa kuti amuna amakumana ndi zophinja/mavuto osiyana

1  
2  
3 ndi amayi. Ndimafuna ndimve maganizo anu pa zofunika kuti tikonze bwino thandizoli kuti likhale  
4 losavuta kufikira ndi kugwiritsa ntchito.  
5

- 6  
7 1) Momwe mukuganizira, kodi mungandiuzeke njira yabwino kwambiri yomwe mukuganiza kuti  
8 thandizo la ARV lingamaperekedwere kwa bwenzi lanu? Chipatala chitatu chichitepo kanthu....  
9 a) Kodi bwenzi lanu lingafune lidzipita nthawi zotani ku chipatala kukatenga mankhwala  
10 i) Tsiku la mu sabata, nthawi?  
11 ii) *Ndi chifukwa chani?*  
12 b) Kodi ndi malo ati omwe bwenzi lanu lingakonde kumakatengerako ARV?  
13 i) Pa chipatala cha pafupi nanu, kutali nanu, kwina mu dela lino (MALO ATI KWENIKWENI)  
14 pakhomo panu  
15 ii) *Ndi chifukwa chani?*  
16  
17 2) Kodi mukuganiza kwanu, mukuona kuti bwenzi lanu likufunika uthenga wina owonjezera? Pa  
18 zokhudza ubwino wa ARV, momwe lingasungire chinsinsi cha momwe mthupi mwawo mulili kapena  
19 kuwauza ena za mthupi mwawo, zina zikhuzana ndi thanzi lawo?  
20 a) Bwenzi lanu lingakonde litalandira mu njira yotani uthengawu? Kukawapeza paokha (paokha,  
21 kulembedwa mu bukhu, pa wailesi, kuimbidwa fonu)  
22 b) Ndi NDANI amene bwenzi lanu lingakonde kulankhula naye za uthengawu? (Dokotala, Expert  
23 Client, anthu ena a mu dera)  
24  
25 3) Kodi mukuganiza kuti bwenzi lanu likufunika thandizo lapadera? Mwachitsanzo, kukumbutsidwa kuti  
26 lipite ku chipatala, kulankhula ndi munthu wina mowirikiza pa zomwe akukumana nazo pakumwa  
27 ARV, kuthandizidwa kuuza ena za mmomwe mthupi mwawo mulili ndi zina)  
28 a) *Bwenzi lanu lingakonde litalandira mu njira yotani thandizoli? Kukawapeza pawokha (pawokha,*  
29 *kulembedwa mu bukhu, pa wailesi, kuimbidwa fonu)*  
30 b) *Ndi NDANI amene bwenzi lanu lingakonde kulankhula naye za thandizoli? (Dokotala, Expert*  
31 *Client, anthu ena a mu dera)*  
32  
33 4) Potengera thandizo ndi chisamaliro cha ma ARV, pakati pa nthawi yokatengera mankhwala, malo ake,  
34 uthenga owonjezera ndi thandizo la padera, kodi mukuganiza kuti chofunikira kwambiri ndi chiti kwa  
35 bwenzi lanu?  
36 a) *Ganizirani amuna ena a mdera lanu. Kodi mukuganiza kuti iwo angatchule chani ngati chinthu*  
37 *chofunikira kwambiri kwa amuna pa zomwe tachula zija?*  
38  
39  
40  
41

## 42 **SPECIFIC SUGGESTIONS ON CURRENT INTERVENTIONS**

### 43 FOR MEN WHO ARE CONSIDERED LOSS-TO-FOLLOW UP

- 44  
45  
46  
47  
48 1) Monga takambirana kale poyamba, bwenzi lanu linalandira (Kuyimbilidwa lanyo, uthenga wa pa  
49 lanyo, malangizo, thandizo la ma ARV la pakhomo)  
50 a) *Mukuwona ngati izi zinali zokwanira kulimbikitsa bwenzi lanu kuyamba ma ARV?*  
51 i) *Ngati ayi ndi chani mukanapanga mosiyana? (malo)*  
52 ii) *Ngati eya mukuwona ngati zili zofunika chifukwa chani?*  
53  
54 2) Kodi pali maganizo ena omwe mukuona kuti angathandizepo kupatula omwe tatchulawa  
55 (kukumbutsana, uphungu wapadera, kugawa mankhwala kumudzi) ndi chani?  
56  
57  
58  
59  
60

- a) Ndi chani?
- b) Ndi chifukwa chani mukuona kuti zikhoza kuyenda bwino

## CONCLUSION

- 1) Zikomo chifukwa cha nthawi yanu. Pali choonjezera china chilichonse chomwe mungalankhulepo chokhudza kagwiritsidwe ntchito ka thandizo la ARV ndi amuna?
- 2) Pali chilichonse chokhudza kagwiritsidwe ntchito kanu ka thandizo la ma ARV ndi momwe tingakonzere thandizoli?

### **STOP THE RECORDER AND MAKE SURE RECORDING IS SAVED.**

ZIKOMO CHIFUKWA CHOTENGA NAWO MBALI MU KAFUKUFUKUYU. NDIMAFUNA NDIKULIMBIKITSANI KUTI MA ARV AKHOZA KUTHANDIZA INU KUKHALA MOYO WAUTALI NDINSO WATHANZI.

*The following general education messages should be conveyed to all male and female participants:*

- Anthu onse omwe ayezetsa ndi kupezeka ndi kachilombo ka HIV akuyenera kuyamba kumwa mankhwala a ma ARV mwamsangamsanga kuti zipundulire thanzi lawo komanso apewe kupatsira ena kachilombo.
- Matenda oopsa akhoza kugwira munthu ngakhale amene chiwerengero cha asilikali a mnthupi ndi ochulukira (kuposera 500) posaonetsa zizindikiro zoyamba. Mankhwala a ma ARV amachepetsa chiopsezochi.
- Anthu omwe ayamba kumwa ma ARV ndipo akupitiliza moyo wawo onse osalekalekeza akhoza kukhala moyo wa thanzi ndi wautali chimodzimodzi anthu omwe alibe kachilombo ka HIV.
- Ngakhale simukumva kudwala, mankhwala a ARV ndi ofunikirabe kuti mukhale ndi thanzi moyo wanu onse.
- Mankhwala a ma ARV amachepetsa mlingo wa tidzilombo mthupi mwanu kotero amachepetsa chiposezo chopatsira kachilombo kwa ena.
- Mankhwala omwe alipo pakadali pano a ma ARV ndiosavuta kumwa komanso sakhala ndi mavuto ambiri. Anthu ena amakhala ndi mavuto obwera kamba komwa mankhwala masabata oyambirira koma izi zimatha. Ngati zikupitilirabe pali mtundu wina wa mankhwala omwe akhoza kukupatsani.

## 14.11. APPENDIX K: In-Depth Interview Guide – Male

---

**IN-DEPTH INTERVIEW GUIDE**  
**Identifying efficient linkages strategies for HIVST (IDEaL)**  
 Male

---

**BEGIN RECORDING**

Original Study ID: \_\_\_\_\_

Repeat Original Study ID: \_\_\_\_\_

State if male or female respondent \_\_\_\_\_

Health Facility: \_\_\_\_\_

Date of Interview: \_\_\_\_\_

Full Name of Interviewer: \_\_\_\_\_

District where respondent Lives: \_\_\_\_\_

**DEMOGRAPHICS:**

|                                                                                                                             |                                                                                                                                                                                                 |
|-----------------------------------------------------------------------------------------------------------------------------|-------------------------------------------------------------------------------------------------------------------------------------------------------------------------------------------------|
| 1. What is your current age in years?                                                                                       | Age in <input type="text"/> <input type="text"/><br>Completed Years                                                                                                                             |
| 2. How would you rate your health today on a scale from 1-5 with 1 being excellent health and 5 being the very poor health? | <input type="checkbox"/> Excellent (1)<br><input type="checkbox"/> Very good (2)<br><input type="checkbox"/> Good (3)<br><input type="checkbox"/> Fair (4)<br><input type="checkbox"/> Poor (5) |
| 3. Now I'd like to ask about your relationships. Are you currently in a sexual relationship?                                | <input type="checkbox"/> Yes (1)<br><input type="checkbox"/> No (0)<br><b>If NO, skip to QUALITATIVE</b>                                                                                        |
| 4. Does your partner know <u>your</u> HIV status?                                                                           | <input type="checkbox"/> Yes (1)<br><input type="checkbox"/> No (0)                                                                                                                             |

|                                                     |  |
|-----------------------------------------------------|--|
| 5. How many times have you tested for HIV?          |  |
| 6. When was the first time you tested HIV-positive? |  |

### Open- Ended Questions

*Note: The in-depth interview will be open-ended and guided by the respondent's answers. This outline reflects a general guide for the in-depth interviews.*

*The interviews are meant to help us understand barriers and facilitators to ART initiation. We are also interested in their thoughts on new interventions we are developing to help men start ART. The following questions are meant to guide interviewers. Actual questions asked during the interview will vary based on participant responses.*

SCRIPT: Now I'd like to talk to you about your experience with HIV services.

### HIV TESTING

1. Think about when you used an HIV self-test kit (show the kit). When did you use it?
2. How did you feel after receiving the HIV positive status?
3. Can you talk to me about what happened after you tested HIV positive? Walk me through it so I can see the picture in detail?.
  - a. Did you talk to anyone about it?
  - b. Has your HIV status changed your daily activities at all? (Your schedule/routine)
  - c. Has your HIV status impacted your relationships? How?
  - d. Have you disclosed your status to anyone besides your partner? Why/why not

### INTERVENTION

1. After you tested positive, we approached you to be a part of our study. Since you were enrolled in the study (ie in the last 3 months), can you walk me through what has happened related to HIV health services?
  - a. Probe: What kinds of interactions have you had with expert clients or health personelle (phone call, SMS, in-person visits, home based ART).
  - b. What was the frequency of these interactions (weekly, every other week, monthly)

### ART INITIATION

2. Since you have been enrolled in the study, have you initiated ART?

#### INITIATED

3. How long did it take you to initiate ART? (several weeks, several months?). Where did you initiate?
  - a. Why did you initiate ART so quickly/slowly?
4. Since you initiated treatment, have you continued to take you medication?

- 1  
2  
3 a. Have you returned to the clinic for another refill of ART? Have there been challenges to  
4 staying on treatment – how have you overcome them?  
5

6 **NOT INITIATED**

- 7  
8 1) Since you tested HIV-positive, have you been to a health facility?  
9 a) When did you attend? (year)  
10 b) Why did you attend? (guardian vs client; HIV vs OPD)  
11 c) Why did you not initiate ART during this visit?  
12

13 **ART UPTAKE**

- 14  
15 2) We know starting ART is difficult. What do you think is most the most difficult thing about starting  
16 ART?  
17 a) PROBE: Think about your male friends. What do you think they would say is the most difficult  
18 part about starting ART for men in your village?  
19

20 **INITIATED ART**

- 21 1) How has taking ART affected your daily activities at all? (your schedule/routine) In bad ways? In  
22 good ways?  
23 2) How has taking ART affected your relationships? In bad ways? In good ways?  
24 3) Does being on ART change if you are able to hide/keep your HIV status from other people/ If you are  
25 able to hide/keep your status other people, does that make it easier to be on ART? How?  
26

27 **NOT INITIATED ART**

- 28 1) How do you think taking ART would affect your daily activities at all? (your schedule/routine) In bad  
29 ways? In good ways?  
30 2) How do you think taking ART would affect your relationships? In bad ways? In good ways?  
31 3) Would being able to hide/keep your HIV status from other people make it easier for you to be on  
32 ART? How?  
33  
34 4) What do you think is most the SECOND most difficult thing about starting ART?  
35  
36 a) PROBE: Think about your male friends. What do you think they would say is the SECOND most  
37 difficult part about starting ART for men in your village?  
38  
39  
40

41 **SUGGESTIONS FOR ART SERVICES**

42 Thank you for all the information. We would like to develop ART services that meet the needs of men in  
43 your community. We understand that men are busy and may face different challenges than women. I  
44 would like to know your opinion about what is needed in order to make ART services easy to use for men  
45 in your community  
46

- 47  
48 1) Could you describe the ideal way ART services would be given to you? If the clinic could do anything  
49 a) When would you want to pick up ART?  
50 b) Probe: day of week, time of day?  
51 c) Why do you say this?  
52 2) Where would you want to pick up ART?  
53 a) Clinic near you, clinic far from you, somewhere in the community (WHERE SPECIFICALLY), at  
54 your home?  
55 b) Why do you say this?  
56  
57  
58  
59  
60

I would like to learn about how you felt about each of the interactions we talked about earlier (remind participant of what they mentioned – ex: phone calls, texts, in person visits, home based ART)

- 1) What did you like about them?
  - a) Why? (ex: individual follow-up, sense of support, not having to travel to the clinic for homebased ART)
- 2) What did you dislike about them? What were challenges?
  - a) Why? (ex: difficulty maintaining privacy with contact or visits, doesn't want to start ART for other reasons)
- 3) Do you feel like these things helped encourage you to seek health services?
  - a) If YES, why?
  - b) If NO, why?
- 4) Do you think these things would help other men in your community if they were to test positive for HIV?

#### INITIATED

- 1) Do you feel that these things helped to encourage you to initiate and stay on ART?
- 2) Do you think you would have started treatment without them?

#### NOT INITIATED

- 1) Why do you think these things failed to help you start/stay on treatment?
  - a) Why?
- 2) If you could change anything about these interactions that you have listed, what would you change?
  - a) Probe: Type of contact, frequency of contact, personelle, location, topics covered
- 3) We understand that everyone is different. Beyond what you have experienced, do you still have problems related to seeking health services for HIV? (i.e. are there still things that you need?)
  - a) What are these unmet needs?
  - b) What do you feel would be the best solution to meet those needs?
- 4) Are there any other ideas/services we should think about doing beside the ones we just talked about (appointment reminders, in-depth counseling, community/home ART)?
  - a) What is it?
  - b) Why do you think this could work?
- 5) Is there anything else that you would like to add as we are towards the end of the interview?

**STOP THE RECORDER AND MAKE SURE RECORDING IS SAVED.**

**THANK YOU FOR YOUR PARTICIPATION IN THIS INTERVIEW. LET ME ENCOURAGE YOU THAT ARVS CAN HELP YOU LIVE LONG AND HEALTHY.**

*The following general education messages should be conveyed to all male and female participants:*

- All people who have been tested HIV positive should start ART as soon as possible for their own health and to prevent passing the virus on to others.

- Serious diseases can occur even in patients with high CD4 count (>500), without any previous symptoms. Immediate ART greatly reduces this risk.
- People that start ART and continue lifelong without interruptions can remain healthy and live as long as people without HIV.
- Even though you may not feel sick, ART is still important to keep you healthy for the rest of your life.
- ART reduces the amount of virus in your body and therefore can reduce the chance that HIV is passed to your sex partners.
- Current ART regimens are easy to take and rarely cause serious side-effects. Some people have side effects in the first few weeks of treatment and these almost always go away. IF there are persistent side effects, an alternative HIV regimen can be given.

*Be careful not to give any specific medical advice but rather refer respondents back to the clinic to speak to a provider.*



**IN-DEPTH INTERVIEW GUIDE**  
**Identifying efficient linkages strategies for HIVST (IDEaL)**  
 Male (Chichewa)

**BEGIN RECORDING**

Original Study ID: \_\_\_\_\_

Repeat Original Study ID: \_\_\_\_\_

State if male or female respondent \_\_\_\_\_

Health Facility: \_\_\_\_\_

Date of Interview: \_\_\_\_\_

Full Name of Interviewer: \_\_\_\_\_

District where respondent Lives: \_\_\_\_\_

|                                                                                                                                                                     |                                                                                                                                                                                                                                                       |
|---------------------------------------------------------------------------------------------------------------------------------------------------------------------|-------------------------------------------------------------------------------------------------------------------------------------------------------------------------------------------------------------------------------------------------------|
| 1. Kodi pakadali pano muli ndi zaka zingati zakubadwa?                                                                                                              |                                                                                                                                                                                                                                                       |
| 2. Kodi thanzi lanu mungati lilibwanji lero pa mlingo wa 1 mpaka 5, pamene 1 akuyimira thanzi labwino kwambiri ndi 5 akuyimira kuti thanzi lanu silili bwino konse? | <input type="checkbox"/> Lili bwino kwambiri (1)<br><input type="checkbox"/> Lilibwino (2)<br><input type="checkbox"/> Pakati mpakati (3)<br><input type="checkbox"/> Silili bwino (4)<br><input type="checkbox"/> Silili bwino ngakhale pang'ono (5) |
| 3. Pano ndimafuna ndikufunsemi za maubwenzi. Kodi pakadali pano muli pa ubwenzi ogonana?                                                                            | <input type="checkbox"/> Eya (1)<br><input type="checkbox"/> Ayi (0)<br><b>If NO, skip to QUALITATIVE</b>                                                                                                                                             |
| 4. Kodi bwenzi lanu limadziwa kuti mthupi mwanu muli bwanji kumbali ya HIV?                                                                                         |                                                                                                                                                                                                                                                       |

|                                                                                               |  |
|-----------------------------------------------------------------------------------------------|--|
| 5. Mwayezetsa kokwana kangati HIV?                                                            |  |
| 6. Kodi ulendo oyamba omwe mudayezetsa ndi kukupezani ndi kachilombo ka HIV ndi liti? (chaka) |  |

Pano ndimafuna ndikufunsemi mafunso okhudzana ndi zomwe mwakumana nazo zokhudza ndi thandizo la HIV.

## HIV TESTING

- 1) Ganizirani nthawi yomwe mudagwiritsa ntchito kachipangizo kodziyezera wekha HIV (awonetseni), kodi liti mudagwiritsa kachipangizoka?
- 2) Kodi munamva bwanji mutaona kuti zikuonetsa kuti muli ndi kachilombo ka HIV?
- 3) Mungandifotokozele zomwe zinachitika mutayezetsa ndikupezeka ndi HIV? Mugafofokoze mwatsatanetsatane kuti ndione chithunzithunzi cha momwe zinalili?
  - a) Munalankhula ndi aliyense?
  - b) Kodi kudziwa kuti muli ndi kachilombo ka HIV kunasinthanthawo zanu za tsiku ndi tsiku?
  - c) Kodi kudziwa kuti muli ndi kachilombo ka HIV kunakhudza maubwenzi anu? Motani?
  - d) Kodi munayamba mwauzapo za momwe mthupi mwanu mulili kupatula kwa okondedwa anu? Chifukwa chani?

## INTERVENTION

- 1) Chifukwa choti munapezeka ndi HIV, tinakupezani kuti mutenge nawo mbali mu study yathu. Poti munatenga nawo mbali mu study (miyezi itatu yapitayi), mungandifotokozere zomwe zakhala zikuchitika zokhudza ndi thandizo la HIV?
  - a) Mwakhala ndi mikumano yotani ndi omwe ali kale pa ma ARV kapena a zaumoyo (pa lamyathenga wa lamyatham'anja, kuyankhulana pamaso, kupita nokha kukakumana nawo, kulandira thandizo la ma ARV pakhomo).
  - b) Kodi mikumanoyi imachitika pafupipafupi bwanji?

## ART INITIATION

- 1) Chiloweleni mu study, mwayamba kulandira ma ARV?

### OYAMBA MANKHWALA

- 2) Kodi zinatenga nthawi yaitali bwanji musanayambe kumwa mankhwala a ARV? (masabata angapo, miyezi ingapo?) Kodi mukanayambira kuti? Kodi munayamba kumwa mankhwala mnsanga/mochedwa chifukwa chani?
- 3) Chiyambileni kulandira thandizo la ARV, kodi mukupitiliza kumwa mankhwala anu?
  - a) Mwapitako ulend wina kuchipatala kukalandira mankhwala ena a ma ARV? Mwakhala mukukumana ndi zovuta zina chifukwa chokumwa mankhwala ama ARV, kodi mavutowa mwawathetsa bwanji?

OSAYAMBA MANKHWALA

- 4) Mutayezetsa nkupezeka ndi kachilombo ka HIV, munayamba mwapitapo ku chipatala?
  - a) Munapita liti? (chaka)
  - b) Munapita chifukwa chani? (kuperekeza odwala wina kapena munadwala?; munapitila HIV kapena ku OPD)
  - c) Kodi simunayambe kumwa mankhwala a ma ARV nthawi imeneyi chifukwa chani?

**ART UPTAKTE**

- 1) Tikudziwa kuti kuyamba kumwa mankhwala a ARV kumavutirapo. Kodi mukuona kuti chovuta chachikulu pa kuyamba kumwa mankhwala ndi chani?
  - a) *Ganizirani anzanu aamuna mmudzi mwanu. Kodi mukuona kuti iwo angatchule chani ngati chovuta chachikulu pa kuyamba kumwa mankhwala a ART?*

OYAMBA MANKHWALA

- 2) Kodi kumwa mankhwala kwakhudza bwanji ntchito zanu za tsiku ndi tsiku? Mu njira yabwino kapena yobwerera mmbuyo?
- 3) Kodi kumwa mankhwala kwakhudza bwanji maubwenzi anu? Mu njira yabwino kapena yobwerera mmbuyo?
- 4) Kodi kumwa mankhwala a ARV kumaphweka mukabisa momwe mthupi mulili kwa anthu ena? Motani?

OSAYAMBA MANKHWALA

- 5) Kodi mukuganiza kuti kumwa ma ARV kungakhudze bwanji ntchito zanu za tsiku ndi tsiku? Mu njira yabwino kapena yobwerera mmbuyo?
- 6) Kodi mukuganiza kuti kumwa mankhwala a ma ARV kungakhudze bwanji maubwenzi anu? Mu njira yabwino kapena yobwerera mmbuyo?
- 7) Kodi kumwa mankhwala a ARV kungaphweke/kumaphweka kuti mukabisa momwe mthupi mulili kwa anthu ena? Motani?
- 8) Kodi chinthu chachiwiri chovuta kwambiri pa kuyamba kumwa mankhwala ndi chani?
  - a) Ganizirani amuna ena a mmudzi mwanu. Kodi mukuganiza kuti anganene kuti chovuta CHACHIWIRI pa kuyamba kumwa a ma ARV ndi chani mmudzi mwanu?

**SUGGESTIONS FOR ART SERVICES**

Zikomo chifukwa cha mayankho anu. Timafuna titakhazikitsa ndondomeko zokomera amuna mu dera lanu zokhudza thandizo la ma ARV. Tikumvetsetsa kuti amuna amakhala otangwanidwa ndipo amakumana ndi mavuto osiyana ndi amayi. Ndimafuna ndimve maganizo anu pa zofunika kuti tikonze bwino thandizoli maka kwa amuna mu dera lino.

- 1) Kodi mungandiuzeke njira yabwino kwambiri yomwe mukuganiza kuti thandizo la ma ARV lingamaperekedwere kwa inu, chipatala chitati chichitepo kanthu....
  - a) Kodi mungafune mudzipita nthawi zotani ku chipatala kukatenga mankhwala?
    - i) Tsiku la mu sabata, nthawi?
    - ii) Ndi chifukwa chani?
  - b) Kodi ndi malo ati omwe mungakonde kumakatengerako ARV?
    - i) Pa chipatala cha pafupi nanu, kutali nanu, kwina mu dela lino (MALO ATI KWENIKWENI) pakhomo panu
    - ii) Ndi chifukwa chani?
- 2) Ndimafuna ndinve za momwe mukunvera za kucheza konse tinali nako poyamba(Kumbutsani otenga nawo mbali zomwe anatchula-kuyimbilidwa lamya, uthenga wa pa lamya, kupitako okha, thandizo la pakhomo la ARV)
  - a) Chomwe munakondapo chinali chani?
    - i) Chifukwa?(Kuyendeledwa, kunva kuthandizidwa, osafunika kupita ku chipatala kukalandira ma AR olandilira pakhomo)
  - b) Chomwe simunaonde ndi chani? Zovuta zinali chani?
    - i) Chifukwa? (chitsanzo: kuvutika kusunga chinsinsi ndi owadziwa kapena mikumano,simukufuna kuyamba kumwa ma ARV pazifukwa zina)
  - c) Mukuganiza kuti zinthu zimennezi zakulimbikitsani kupeza thandizo la zaumoyo?
    - i) Ngati eya , chifukwa?
    - ii) Ngati ayi, chifukwa chani?
  - d) Kodi mukuona ngati zinthu zimenezi zingathandize anthu ena mu dela lanu ngati angakhale ndi HIV?

#### OYAMBA MANKHWALA

- 1) Kodi mukuona ngati zinthu zimenezi zinakuthandizani kulimbikitsika kuti muyambe komanso kupitiliza kumwa mankhwala a ma ARV?
  - a) Kodi mukuganiza kuti mukanatha kuyamba thandizo la ma ARV popanda zimenezi?

#### OSAYAMBA MANKHWALA

- 1) Kodi mukuganiza kuti zinthu zimenezi zinalephera kukuthandizani kuyamba/kukhala mankhwala a ma ARV?
  - a) Chifukwa?
- 2) Ngati mungathe kusintha chilichonse cha mikumano yomwe mwatchula,chingakhale chani?
  - a) Mtundu wa mkumano, muligo wa mkumano, muthu, malo,mitu yokambilana
- 3) Tikunvetsa kuti anthu ndife osiyana. Kuposa zomwe mwakumana nazo, pakadali pano mukukumanabe ndi mavuto okhudzana ndi kupeza thandizo la zaumoyo la HIV? (pali zinthu zina zomwe mumafunabe?)
  - a) Ndi zinthu ziti?
  - b) Mukuganiza kuti ndi njira yanji yabwino yothandiza kupeza zofunikazi?

- 1  
2  
3 4) Kodi pali maganizo ena omwe mukuona kuti angathandizepo kupatula omwe tachulawa  
4 (kukumbutsana, uphungu wapadera, kugawa mankhwala kumudzi) ndi chani? Mukuona kuti  
5 maganizo anuwa angatheke chifukwa chani?  
6  
7 5) Apa tikufunakumaliza kucheza kwathu, pali china chiwinjezera chomwe mungalankhulepo pa zomwe  
8 takambirana?  
9

10  
11 **STOP THE RECORDER AND MAKE SURE RECORDING IS SAVED.**  
12

13  
14  
15 ZIKOMO CHIFUKWA CHOTENGA NAWO MBALI MU KAFUKUFUKUYU. NDIMAFUNA  
16 NDIKULIMBIKITSANI KUTI MA ARV AKHOZA KUTHANDIZA INU KUKHALA MOYO  
17 WAUTALI NDINSO WATHANZI.  
18

19 *The following general education messages should be conveyed to all male and female participants:*  
20

- 21  
22 • Anthu onse omwe ayezetsa ndi kupezeka ndi kachilombo ka HIV akuyenera kuyamba kumwa  
23 mankhwala a ma ARV mwamsangamsanga kuti zipundulire thanzi lawo komanso apewe  
24 kupatsira ena kachilombo.  
25  
26 • Matenda oopsa akhoza kugwira munthu ngakhale amene chiwerengero cha asilikali a mnthupi ndi  
27 ochuluka (kuposera 500) posaonetsa zizindikiro zoyamba. Mankhwala a ma ARV amachepetsa  
28 chiopsezochi.  
29  
30 • Anthu omwe ayamba kumwa ma ARV ndipo akupitiliza moyo wawo onse osalekalekeza akhoza  
31 kukhala moyo wa thanzi ndi wautali chimodzimodzi anthu omwe alibe kachilombo ka HIV.  
32  
33 • Ngakhale simukumva kudwala, mankhwala a ARV ndi ofunikirabe kuti mukhale ndi thanzi moyo  
34 wanu onse.  
35  
36 • Makhwala a ma ARV amachepetsa mlingo wa tidzilombo mthupi mwanu kotero amachepetsa  
37 chiposezo chopatsira kachilombo kwa ena.  
38  
39 • Mankhwala omwe alipo pakadali pano a ma ARV ndiosavuta kumwa komanso sakhala ndi  
40 mavuto ambiri. Anthu ena amakhala ndi mavuto obwera kamba komwa mankhwala masabata  
41 oyambirira koma izi zimatha. Ngati zikupitilirabe pali mtundu wina wa mankhwala omwe akhoza  
42 kukupatsani.  
43  
44  
45  
46  
47

48 *Be careful not to give any specific medical advice but rather refer respondents back to the clinic to*  
49 *speak to a provider.*  
50  
51  
52  
53  
54  
55  
56  
57  
58  
59  
60

## 14.12. APPENDIX L: Personel CV's

**Kathryn L. Dovel**

Department of Medicine, Division of Infectious Diseases  
kdovel@mednet.ucla.edu

Email:

David Geffen School of Medicine at UCLA

Office: +1 (310) 825-7225

10833 Le Conte Ave 37-121 CHS

Fax: +1 (310) 825-3632

Los Angeles, CA 90095

**POSITIONS HELD**

- 2017- Adjunct Assistant Professor, Division of Infectious Disease  
Department of Medicine, David Geffen School of Medicine - UCLA
- 2017- Research Director - Partners in Hope  
Lilongwe, Malawi
- 2016-17 Postdoctoral Fellow in Global HIV Prevention Research  
David Geffen School of Medicine - UCLA, 2016
- 2012-15 International Programs Director - 31Bits International  
Gulu, Uganda

**EDUCATION**

- PhD Health and Behavioral Sciences - University of Colorado Denver, 2016  
*Outstanding CLAS Ph.D. Student for the University of Colorado Denver*  
*Outstanding Dissertation Award for the University of Colorado Denver*  
Dissertation: "Shifting Focus from Individuals to Institutions: The Role of Gendered Health Institutions on Men's use of HIV Services"
- MPH Community Health Sciences - UCLA, 2010  
*Certificate in Global Health*
- BA Sociology & Anthropology (dual major), minor in Biology - Vanguard University, 2007  
*Magna Cum Laude*

**HONORS AND AWARDS**

- 2019 5th place in the 2019 Department of Medicine Research Day poster competition, Department of Medicine, University of California Los Angeles
- 2019 Invited panelist, IAS 2019, Sticky and durable linkage: Latest evidence and new strategies
- 2019 Panel Chair, IAS Pre-Conference 2019, Men and HIV: What we know and what we don't know
- 2019 Top 5 abstracts at CROI, 2019

- 1  
2  
3 2019 Invited participant, Technical Consultation on HIV Linkage, International AIDS Society  
4  
5 2019 Invited participant, Differentiated Service Delivery Think Tank, Gates Foundation  
6  
7 2018 Joep Lange Award (best abstract at INTEREST, 2018)  
8  
9 2018 Female Global Scholar, The Women in Global Health Research Initiative (Weill Cornell  
10 Medicine, Cornell University)  
11  
12 2016 Outstanding Dissertation Award (UCDenver)  
13  
14 2016 Outstanding CLAS Ph.D. Student (UCDenver)  
15  
16 2012-16 Deans Travel Grant (UCDenver)  
17  
18 2007 Delta Kappa Honor Society (Vanguard University)  
19  
20 2007 Alpha Kappa Delta Honor Society (Vanguard University)  
21  
22 2007 Lambda Alpha Honor Society (Vanguard University)  
23  
24 2007 Anthropology Student of the Year (Vanguard University)

## EXTERNAL GRANTS

- 25 2019-2023 Principle Investigator, Bill and Melinda Gates Foundation. (001423) “Identifying Effective  
26 Linkage Strategies for HIVST (IDEaL)”  
27  
28 2019-2024 Principle Investigator, Fogarty International Center. International Research Scientist  
29 Development Award (K01), K01TW011484. “Innovative strategies to increase ART  
30 Initiation and viral suppression among HIV+ men in Malawi”.  
31  
32 2019-2020 Principle Investigator, Clinton Health Access Foundation. “The impact of facility HIV self-test  
33 scale up in Malawi: a mixed methods study”  
34  
35 2018-2021 Co-Investigator, The Conrad N. Hilton Foundation. Delivery of childhood development services  
36 as part of HIV treatment services in Malawi. Project implemented by UCLA and Partners in  
37 Hope.  
38  
39 2017-19 Principal Investigator, USAID. **Use of HIV self-test kits to increase identification of HIV-**  
40 **infected individuals and their partners: a Cluster Randomized Control Trial.** (sub-study  
41 within a large PEPFAR-USAID grant; PI: Risa Hoffman).  
42  
43 2017-19 Principle Investigator, Clinical Research Scholar, National Institutes of Health Loan  
44 Repayment Program.  
45  
46 2016-18 Co-Principle Investigator, USAID. Test and Start: Tracking Uptake and Retention in Care using  
47 Standard Registry Data. (sub-study within a large PEPFAR-USAID grant; PI: Risa Hoffman).  
48  
49 2015 Principal Investigator, 31Bits International. “Evaluating the impact of a couple’s livelihoods  
50 program on power dynamics and economic attainment among couples in northern Uganda.”  
51 Project implemented by 31Bits International.  
52  
53 2014-16 Principal Investigator, NIMH National Research Service Award Predoctoral Individual  
54 Fellowship, F31-MH103078-01A1, “Gender Disparities in High-Risk PITC: The Role of  
55 Policy on Provider Practices”, Impact Score: 14; Percentile: 2.0  
56  
57 2013-16 Principal Investigator, Stop AIDS Now!. “Evaluation of the ‘Quality HIV and reproductive  
58 maternal and neonatal health services for women and young women in Africa through good  
59  
60



clinical governance and community-driven accountability”’. Project implemented by the Clinton Health Access Initiative.

## INTERNAL GRANTS

- 2016-18 Principal Investigator, UCLA Center for AIDS Research Seed Grant, University of California Los Angeles, “The Gendered Dynamics of ART Uptake and Retention under Universal Treatment Policies. Examining trends and ART barriers in Central Malawi”
- 2014 Principal Investigator, Calvin L Wilson Scholarship, University of Colorado Denver, “Gender and the provision of HIV testing: Examining how models of care influence men’s use of testing services in southern Malawi”
- 2013-15 Principal Investigator, Dissertation Grant, University of Colorado Denver, “Gender Disparities in High-Risk PITC: The Role of Policy on Provider Practices”
- 2013-14 Principal Investigator, Robinson Durst Scholarship, University of Colorado Denver, “Gender disparities in high-risk PITC: Exploring the influence of feminized policy on provider practices in Malawi”
- 2009 Principal Investigator, Drabkin and Bixby International Scholarship, UCLA, “Evaluating barriers and facilitators of a nutrition program in the Bateyes of Dominican Republic”
- 2009 Principal Investigator, Global Health Grant, UCLA, “Evaluating a Nutrition Program in the Bateyes of Dominican Republic”

## PUBLICATIONS

\* represents MPH, PhD or medical students I mentored

- 2020 Cornell, Morna, Katherine Horton, Christopher Colvin, Andrew Medina-Marino, **Kathryn Dovel**. Raising the profile of men’s health: the role of the research community: Letter to the editor. *Lancet*. Ahead of Print.
- 2020 **Dovel, Kathryn**, Mike Nyirenda, Frackson Shaba\*, O. Agatha Offorjebe\*, Kelvin Balakasi, Brooke Nichols, Khumbo Phiri\*, Khumbo Ngona, Sundeep K Gupta, Risa Hoffman. “Facility-based HIV self-testing for outpatients dramatically increases HIV testing in Malawi: a cluster randomized trial.” *Lancet Global Health*. Ahead of print
- 2020 **Dovel, Kathryn**, Khumbo Phii, Misheck Mphande, Deborah Mindry, Esnart Sanudi, McDaphton Bellos, Risa Hoffman. Optimizing Test and Treat in Malawi: Health care worker perspectives on barriers and facilitators to ART initiation among healthy clients. *Global Health Action*. Ahead of Print.
- 2020 Hubbard, Julie, Khumbo Phiri\*, Corrina Moucheraud, Kaitlyn McBride, Ashley Bardon, Kelvin Balakasi, Eric Lungu, **Kathryn Dovel**, Gift Kakwesa, Risa Hoffman. A qualitative assessment of provider and client experiences with three- and six-month dispensing of antiretroviral therapy in Malawi. *Global Health: Science and Practice*. Ahead of Print.



- 1  
2  
3 2020 Hoffman, Risa M, Kelvin Balakasi, Ashley Bardon, Zumbe Siwale, Julie Hubbard, Gift  
4 Kakwesa, Mwiza Haambokoma, Thoko Kalua, Pedro Pisa, Crispin Moyo, **Kathryn Dovel**,  
5 Thembi Xulu, Ian Sanne, Matt Fox, Sydney Rosen. Eligibility for differentiated models of  
6 HIV treatment service delivery: an estimate from Malawi and Zambia. *AIDS*. 1;34(3):475-  
7 9.
- 8  
9  
10 2019 McBride, Kaitlyn, Julie Parent, Kondwani Mmanga, Mackenzie Chivwala, Mike H.  
11 Nyirenda, Alan Schooley, James B. Mwambene, **Kathryn Dovel**, Eric Lungu,  
12 Kelvin Balakasi, Risa M. Hoffman, Corrina Moucheraud. "ART Adherence Among  
13 Malawian Youth Enrolled in Teen Clubs: A Retrospective Chart Review." *AIDS*  
14 *Behav.* (2019): 1-5.
- 15  
16  
17 2019 Frackson Shaba\*, Ogechukwu Offorjebe\*, Phiri Khumbo, Lungu Eric, Kalande Pericles,  
18 Nyirenda Mike, Hoffman M Risa, Gupta Sundeep, **Dovel Kathryn**. Perceived  
19 Acceptability of a Facility-Based HIV Self-Test Intervention in Outpatient Waiting Spaces  
20 Among Adult Outpatients in Malawi: A Formative Study. *JAIDS*. 1;81(3):e92-4.
- 21  
22 2019 Magaço Amílcar, **Dovel Kathryn**, Cataldo Fabian, Nhassengo Pedroso, Nuera Lucas,  
23 Tique José, Saide Mohamed, Couto Aleny, Mbofana Francisco, Gudo E Eduardo, Cuco  
24 Rosa Marlene, Chicumbe Sérgio. "Good health as a barrier and facilitator to ART  
25 initiation: a qualitative study in the era of Test and Treat in Mozambique." *Cult Health Sex.*  
26 *11:1-5*.
- 27  
28 2018 Cornell M, **Dovel K**. Reaching key adolescent populations. *Cur Opinion HIV AIDS*.  
29 1;13(3):274-80.
- 30  
31 2018 Sara, Yeatman, Stephanie Chamberlin\*, **Kathryn Dovel**. Women's (health) work: A  
32 population-based, cross-sectional study of gender differences in time spent seeking health  
33 care in Malawi. *PLoS ONE*. 13(12): e0209586
- 34  
35 2018 Nhassengo, Pedroso Fabian Cataldo, Amílcar Magaço, Risa Hoffman, Lucas Nuera, José  
36 Tique, Mohamed Saide, Aleny Couto, Francisco Mbofana, Eduardo Gudo, Rosa Marlene  
37 Cuco, Sérgio Chicumbe, **Kathryn Dovel**. "Barriers and facilitators to the uptake of  
38 universal treatment in Mozambique: a qualitative study on patient and provider  
39 perceptions." *PLoS ONE*. 13(12): e0205919
- 40  
41 2018 Hubbard, Julie, Gift Kakwesa, Mike Nyirenda, James Mwambeneb, Ashley Bardona,  
42 Kelvin Balakasi, **Kathryn Dovel**, Thokozani Kaluac, Risa Hoffman. Towards the third 90:  
43 improving viral load testing with a simple quality improvement program in health facilities  
44 in Malawi. *International Public Health*. Ahead of print.
- 45  
46 2018 **Dovel, Kathryn**, Frackson Shaba\*, Ogechukwu Offorjebe\*, Kelvin Balakasi, Khumbo  
47 Phiri\*, Brooke Nichols, Chi-Hong Tseng, Ashley Bardon, Khumbo Ngona, Risa Hoffman.  
48 "Evaluating the integration of HIV self-testing into low-resource health systems: study  
49 protocol for a cluster randomized trial from EQUIP Innovations" *Trials*. 19:498.
- 50  
51 2018 Moucheraud, Corrina, Dennis Chasweka, Mike Nyirenda, Alan Schooley, **Kathryn Dovel**,  
52 Risa Hoffman. "A simple screening tool may help identify high-risk children for targeted  
53 HIV testing in Malawian inpatient wards." *JAIDS*. 79:352-7.
- 54  
55 2018 Cornell Morna, **Dovel Kathryn**. "Reaching key adolescent populations." *Current opinion*

in *HIV and AIDS*. 13(3):274-80.

- 2016 **Dovel, Kathryn**, Sara Yeatman, Joep Vanoosterhout, Adrienne Chan, Alfred Matengeni, Megan Landes, Richard Bedell, and Sumeet Sodhi. "Trends in ART Initiation among Men and Non-Pregnant/Non-Breastfeeding Women before and after Option B+ in Southern Malawi." *PLoS ONE*. (12): e0165025.
- 2016 Poulin, Michelle, **Kathryn Dovel** and Susan Watkins. "Men with money and the 'vulnerable women' client category in an AIDS epidemic." *World Development*. 85; 16-30.
- 2016 **Dovel, Kathryn**, Susan Watkins, Sara Yeatman, and Michelle Poulin. "Prioritizing strategies to reduce AIDS-related mortality for men in sub-Saharan Africa: Author's reply." *AIDS*. 30(1); 158-9.
- 2015 **Dovel, Kathryn**, Sara Yeatman, Susan Watkins, and Michelle Poulin. "Men's heightened risk of AIDS-related death: the legacy of gendered HIV testing and treatment strategies." *AIDS*. 29; 1123-5.
- 2015 **Dovel, Kathryn** and Kallie Thomson. "Financial obligations and economic barriers to antiretroviral therapy experienced by HIV positive women participating in a job-creation program in northern Uganda." *Culture, Health, and Sexuality*. 18(6).
- 2015 Krueger, Patrick, **Kathryn Dovel** and Justin Denney. "Democracy and self-rated health across 67 countries: A multilevel analysis." *Social Science and Medicine*. 143; 137-44.
- 2013 Conroy, Amy, Sara Yeatman and **Kathryn Dovel**. "The social construction of HIV/AIDS during a time of evolving access to antiretroviral therapy in rural Malawi." *Culture, Health and Sexuality*. 15(8); 924-37.
- 2012 Yeatman, Sara, **Kathryn Dovel**, Amy Conroy and Hazel Namadingo. "The predictors of HIV treatment optimism and its relationship with sexual risk behavior among a population-based sample of young adults in southern Malawi." *AIDS Care*. 25(8);1018-25.

## TECHNICAL MANUSCRIPTS

- 2019 Hopkins, John, Laura Pascoe, Dean Peacock and Kathryn Dovel. "Accelerating Men's HIV service delivery and uptake in Eastern and Southern Africa UNAIDS Literature Review, Eastern and Southern Africa Regional Focus." UNAIDS, Johannesburg, South Africa.
- 2018 Masina, Tobias, **Kathryn Dovel**, Reuben Mwenda on behalf of the Malawi Ministry of Health. "National Guidelines for HIV self-testing." Malawi Ministry of Health Lilongwe Malawi.
- 2017 Pascoe, Laura, Dean Peacock and **Kathryn Dovel**. "To Get to Zero, We Must Also Get to Men – UNAIDS Literature Review, Eastern and Southern Africa Regional Focus." UNAIDS, Geneva.
- 2016 Macharia, Faith, Job Akuno, Faith Wanji, Julius Nguku, **Kathryn Dovel**, Caroline Ngare, Fred Nyagah, and Daniel Mwisunji. "National Guidelines for Male Engagement in HIV Services." Kenya Ministry of Health. Nairobi, Kenya.
- 2016 **Kathryn Dovel**, James Mkandawire, Susan Watkins, Nancy Mulauzi and Sydney Rodney Lungu. "Evaluation of the Good Clinical Governance Project: improving HIV and reproductive health services in Lilongwe, Malawi." Stop AIDS Now!. Lilongwe, Malawi.

## OTHER PUBLICATIONS

- 2019 Kathryn Dovel, Stephanie Chamberlin, Sara, Yeatman. Malawi's Health System Puts Women First. This Isn't Always a Good Thing. *The Conversation: Africa*. Published February 19, 2019. Found at <https://theconversation.com/malawis-health-system-puts-women-first-this-isnt-always-a-good-thing-111277>
- 2016 **Dovel, Kathryn**, Sara Yeatman, and Susan Watkins. **Dying from a treatable disease: HIV and the men we neglect.** *Huffington Post*. Published February 23, 2016. Found at [http://www.huffingtonpost.com/the-conversation-africa/dying-from-a-treatable-di\\_b\\_9295620.html](http://www.huffingtonpost.com/the-conversation-africa/dying-from-a-treatable-di_b_9295620.html)

## WORK IN PREPARATION

- Dovel, Kathryn**. "The gendered organization of HIV services and men's poor use of testing in southern Malawi: consequences of hegemonic masculinity within health institutions." (Revise & Resubmit, JIAS)
- Offorjebe , Ogechukwu\*, Frackson Shaba\*, Kelvin Balakasi, Mike Nyrienda, Risa Hoffman, **Kathryn Dovel**. "Partner-delivered HIV self-testing increases the perceived acceptability of index partner testing among HIV-positive clients in Malawi." (Revise & Resubmit, PLoS ONE)
- Dovel, Kathryn**, Kelvin Balakasi, Khumbo Phiri\*, Frackson Shaba\*, O. Agatha Offorjebe\*, Sundeep K Gupta, Vincent Wong, Eric Lungu, Brooke Nichols, Mike Nyirenda, Ngona K, Anteneh Worku, Risa Hoffman. "A randomized trial on index HIV self-testing for sexual partners of ART clients in Malawi." (Under Review)
- Nichols, Brooke; Offorjebe, O. Agatha; Cele, Refiloe; Shaba , Frackson ; Balakasi, Kelvin; Chivwara, Mackenzie; Hoffman, Risa; Long, Lawrence; Rosen, Sydney; **Dovel, Kathryn**. "Economic evaluation of facility-based HIV self-testing among adult outpatients in Malawi." (Under Review)
- Dovel, Kathryn**, Gladies Orobmi, Melanie Beagly\*, Kallie Thomson. "Including men without sidelining women: the feasibility of male involvement within resource-strained gender equality programs in sub Saharan Africa." (Under Review)
- Dovel, Kathryn** and Kallie Thomson. "Evaluating the impact of a couple's livelihoods program on power dynamics and economic attainment among couples in northern Uganda." (In preparation)
- Dovel, Kathryn**. "Men in global HIV policy: examining discourses of blame and vulnerability." (In preparation)

## SELECT PEER-REVIEWED PRESENTATIONS

- 2020 Moucheraud, Corrina, Samuel W. Lewis, Misheck Mphande, Ben Allan Banda, Hitler Sigauke, Paul Kawale, Aubrey Dkangoma, **Kathryn Dovel**, Alemayehu Amberbir, Agnes Moses, Sundeep Gupta, Risa M. Hoffman. Cervical cancer knowledge and attitudes among HIV-positive men in Malawi." Paper accepted for poster presentation. Conference on Retroviruses and Opportunistic Infections (CROI). Boston, Massachusetts, USA
- 2019 **Dovel, Kathryn**, Kelvin Balakasi, Khumbo Phiri\*, Frackson Shaba\*, O. Agatha Offorjebe\*, Sundeep K Gupta, Vincent Wong, Eric Lungu, Brooke Nichols, Mike Nyirenda, Ngona K, Anteneh Worku, Risa Hoffman. Index HIV self-testing among male partners in Malawi:

- 1  
2  
3 predictors of self-testing within a randomized controlled trial”. Paper accepted for poster  
4 presentation. International AIDS Society. Mexico City, Mexico  
5
- 6 2019 **Dovel Kathryn**, Salem Ejigu, Pericles Kalande, Evelyn Udedi, Chipawiru Mbalanga, Lauri  
7 Bruns, Thomas Coates. “Beyond the Caregiver: Diffusion of early childhood development  
8 knowledge and practices within the social networks of HIV-positive mothers in Malawi”.  
9 Paper accepted for poster discussion. International AIDS Society. Mexico City, Mexico  
10
- 11 2019 **Dovel, Kathryn**, Kelvin Balakasi, Khumbo Phiri\*, Frackson Shaba\*, O. Agatha Offorjebe\*,  
12 Sundeep K Gupta, Vincent Wong, Eric Lungu, Brooke Nichols, Mike Nyirenda, Ngona K,  
13 Anteneh Worku, Risa Hoffman. A randomized trial on index HIV self-testing for sexual  
14 partners of ART clients in Malawi.” Paper accepted for oral presentation. Conference on  
15 Retroviruses and Opportunistic Infections (CROI). Seattle, Washington, USA  
16
- 17 2019 Ogechukwu Offorjebe, **Kathryn Dovel**, Frackson Shaba, Kelvin Balakasi, Risa Hoffman,  
18 Sydney Rosen, Brooke Nichols, for the EQUIP Health team. Cost-effectiveness and national  
19 impact of index HIV self-testing in Malawi. Paper accepted for poster presentation.  
20 Conference on Retroviruses and Opportunistic Infections (CROI). Seattle, Washington, USA  
21
- 22 2018 **Dovel, Kathryn**, Mike Nyirenda, Frackson Shaba\*, Ogechukwu Offorjebe\*, Kelvin Balakasi,  
23 Brooke Nichols, Khumbo Phiri\*, Khumbo Ngona, Alan Schooley, Risa Hoffman on behalf of  
24 EQUIP Innovation for Health. “Facility-based HIV self-testing for outpatients dramatically  
25 increases HIV testing in Malawi: a cluster randomized trial.” Paper accepted for oral  
26 presentation. International AIDS Society. Amsterdam, Netherlands  
27
- 28 2018 Shaba, Frackson\*, Kelvin Balakasi, Ogechukwu Offorjebe\*, Mike Nyirenda, Risa Hoffman,  
29 **Kathryn Dovel** on behalf of EQUIP Innovation for Health. “Facility-based HIV self-testing in  
30 Malawi: an assessment of characteristics and concerns among clients who opt-out of testing.”  
31 Paper accepted for poster presentation. International AIDS Society. Amsterdam, Netherlands  
32
- 33 2018 **Dovel, Kathryn**, Mike Nyirenda, Frackson Shaba, Ogechukwu Offorjebe\*, Kelvin Balakasi,  
34 Brooke Nichols, Khumbo Phiri\*, Khumbo Ngona, Alan Schooley, Risa Hoffman on behalf of  
35 EQUIP Innovation for Health. “Facility-based HIV self-testing for outpatients dramatically  
36 increases HIV testing in Malawi: a cluster randomized trial.” Paper accepted for oral  
37 presentation. INTEREST. Kigali, Rwanda - awarded the Joep Lange INTEREST award  
38
- 39 2018 Offorjebe , Ogechukwu\*, Frackson Shaba, Kelvin Balakasi, Mike Nyrienda, Risa Hoffman,  
40 **Kathryn Dovel** on behalf of EQUIP Innovation for Health. “Partner-delivered HIV self-  
41 testing increases the perceived acceptability of index partner testing among HIV-positive  
42 clients in Malawi.” Paper accepted for mini-oral presentation. INTEREST. Kigali, Rwanda  
43
- 44 2018 Stephanie Chamberlin\*, Misheck Mphande, Pericles Kalande, **Kathryn Dovel** on behalf of  
45 EQUIP Innovation for Health. “Barriers and facilitators to consistent engagement in HIV care  
46 under Test and Treat in Malawi.” Paper accepted for poster presentation. INTEREST. Kigali,  
47 Rwanda  
48
- 49 2017 **Dovel Kathryn**, Khumbo Phiri\*, Alan Schooley, Misheck Mphande, Mackenzie Chivwara,  
50 Risa Hoffman. “Facility-level barriers to antiretroviral therapy experienced by men in  
51 Malawi.” Paper accepted for poster presentation. International AIDS Society. Paris, France  
52
- 53 2017 Misheck Mphande, Khumbo Phiri\*, Mackenzie Chivwara, Mike Nyirenda, Alan Schooley,  
54 Rachel Thomas, Risa Hoffman, **Kathryn Dovel**. “Examining Malawi’s Rollout of Universal  
55 Treatment: Policy Implementation and Provider Perceptions.” Paper accepted for poster  
56 presentation. International AIDS Society. Paris, France  
57  
58  
59  
60

- 1  
2  
3 2016 **Dovel, Kathryn.** “Factors influencing the implementation of provider-initiated testing and  
4 counseling (PITC) among STI clients in southern Malawi: A mixed methods study.” Paper  
5 accepted for poster presentation. International AIDS Society. Durbin, South Africa  
6  
7  
8 2016 Westerhof, Nienke, Dzowela M, **Kathryn Dovel**, E. Banda, J. Chikonda. “Community-driven  
9 accountability through advocacy committees: a vehicle for improving HIV and reproductive  
10 health services for women living with HIV.” Paper accepted for poster presentation.  
11 International AIDS Society. Durbin, South Africa  
12  
13 2016 **Dovel, Kathryn**, Patrick Krueger, Shari Dworkin. “Predictors of men’s use of HIV testing  
14 services in low-income countries: the role of masculinity.” Paper accepted for poster  
15 presentation. Population Association of America. Washington D.C.  
16  
17 2014 **Dovel, Kathryn.** “Gender in HIV Policy: Examining how gender shapes the dissemination of  
18 HIV policies in southern Malawi.” Paper accepted for roundtable presentation. American  
19 Public Health Association. New Orleans.  
20  
21 2014 **Dovel, Kathryn.** “Gendered care: examining how clinic experiences influence HIV testing  
22 decisions among STI patients in southern Malawi.” Paper accepted for oral presentation.  
23 National Women’s Studies Association, San Juan, Puerto Rico.  
24  
25 2013 **Dovel, Kathryn.** “HIV policies and their influence on men's use of care.” Paper accepted for oral  
26 presentation. International HIV Social Science and Humanities Conference, Paris, France.  
27  
28 2007 **Dovel, Kathryn.** “Social and structural impediments that limit proper healthcare in rural southern  
29 Kurdistan.” Paper accepted for oral presentation. The Anthropology and Sociology Research  
30 Conference, Santa Clara, CA.  
31

### 32 INVITED PRESENTATIONS

- 33 2019 “Index HIV Self-Testing in Malawi”. World Health Organization webinar  
34  
35 2019 “Men’s (lack of) access to the health system”. UNAIDS. Regional meeting on Accelerating  
36 Men’s HIV service delivery and uptake in Eastern and Southern Africa.  
37  
38 2019 “Index HIVST in Malawi: a Randomized Control Trial. World Health Organization. Webinar  
39  
40 2019 “*Reaching men and engaging them in HIV care – lessons from Malawi*”. Men and HIV forum.  
41 International AIDS Society. Mexico City, Mexico  
42  
43 2018 “The impact of HIV self-testing on HIV testing among outpatients in high burden facilities in  
44 Malawi: preliminary findings from a cluster randomized control trial” USAID Washington.  
45 Washington D.C  
46  
47 2017 “Who benefits from Test and Treat? Understanding gender dimensions of universal treatment  
48 policies and gender-specific barriers to care” Malawi Ministry of Health, HIV Treatment  
49 Technical Working Group. Lilongwe, Malawi.  
50  
51 2016 “Facility-based barriers to HIV testing among men in Malawi: a systems approach” Malawi  
52 Ministry of Health, HIV Treatment Technical Working Group. Lilongwe, Malawi.  
53  
54 2015 “Men’s heightened risk of AIDS-related death: the legacy of gendered HIV testing and  
55 treatment strategies” United Nations Meeting on Male Engagement. Geneva, Switzerland  
56  
57 2015 “Facility-based barriers to men’s use of HIV testing: recommendations for male engagement  
58 guidelines.” National AIDS Control Council Meeting for the Development of the Male  
59  
60



- 1  
2  
3 Engagement Guidelines. Nairobi, Kenya  
4  
5 2014 “Gendered care: examining who ‘does gender’ in clinical settings and its influence on HIV  
6 services for men in southern Malawi.” Health Working Group, UCLA. Los Angeles, CA  
7  
8 2013 “From questions to methods: mixed methods approach to disparities research.” Course in  
9 Qualitative Methods (Doctoral Students). University of Colorado Denver. Denver, C  
10  
11 2010 “Lost in translation: examples of why best-practice nutrition programs fail in rural Dominican  
12 Republic.” Drabkin and Bixby International Conference, UCLA. Los Angeles, CA  
13  
14  
15

## 16 RELEVANT EMPLOYMENT ACTIVITIES

- 17  
18 2015- Consultant for Mixed Methods, Invest in Knowledge, Zomba, Malawi  
19 Activities: Oversaw data analysis and write-up for studies implemented by Invest in  
20 Knowledge. I focused on qualitative and mixed methods analysis and write-up.  
21  
22 2009-10 Research Specialist, Korean Resource Center, Los Angeles, CA  
23 Activities: Managed data entry and data cleaning and led in data analysis and write-up of a  
24 study assessing use of non-communicable disease services among first- and second-generation  
25 Korean populations in Los Angeles.  
26  
27 2009 Program Evaluation Fellow, Bataye Relief Alliance, Santo Domingo, Dominican Republic  
28 Activities: Led the assessment of a nutritional program aimed to improve child health outcomes  
29 in Haitian populated bateyes in Dominican Republic. I led tool development, training  
30 enumerators, data analysis, and write-up  
31  
32 2007-08 Program Coordinator, Orange County Department of Public Health, Santa Ana, CA  
33 Activities: Conducted literature reviews and assisting in the development of interventions to  
34 address Alcohol and Drug abuse among young adults in Orange County. Assisted in the protocol  
35 development and implementation of interventions.  
36  
37

## 38 SERVICE

- 39 2019 Committee Member of the Men’s HIV Forum at the International AIDS Conference, Mexico City  
40  
41 2018- Member of the Malawi Ministry of Health HIV Self-Testing Guidelines Task Force  
42  
43 2017- Member of the Malawi Ministry of Health HIV Testing Services Technical Working Group  
44  
45 2017- Member of the EQUIP HIV Self-Testing Technical Working Group  
46  
47 2016- Member of the UNAIDS Working Group “Engaging men in solutions for the HIV epidemic: Health  
48 systems.”  
49  
50 2016- Member of the “Men and HIV Global Working Group”  
51  
52 2016 Reviewer for the APHA 2016 Annual Meeting & Expo  
53  
54 2012-13 Editor of the Health and Behavioral Sciences Peer-Reviewed Journal, University of  
55 Colorado, Denver  
56  
57 2011-12 Student Advisory Council Member, University of Colorado, Denver  
58  
59  
60

## COURSES TAUGHT

### Adjunct Professor

Social determinants of health in the context of HIV services in sub-Saharan Africa – Field Rotation Series (UCLA)

Health, Disease & Globalization: Foundations of Epidemiology (Vanguard University)

Human Sexuality (co-taught, Vanguard University)

Cultural Anthropology (Vanguard University)

Applied Anthropology (Vanguard University)

Qualitative Methods (Vanguard University)

### Teaching Assistant

AIDS and Other Sexually Transmitted Diseases (UCLA)

Global Health Issues (UCLA)

Social Determinants of Health (University of Colorado Denver)

Statistical Analysis (University of Colorado Denver)

### MENTORSHIP

University of California Los Angeles. David Geffen School of Medicine. Medical Student. Kate Coursey. “Examining characteristics of women who engage in an integrated Early Childhood Development and PMTCT program in Malawi: endline evaluation.” 2019-

University of California Los Angeles. David Geffen School of Medicine. Medical Student. “Provider acceptability of interventions to increase ART initiation among men who test HIV-positive through index HIV self-testing.” 2019-

University of California Los Angeles. David Geffen School of Medicine. Medical Student. Tijana Temelkowska. “Examining the successes and challenges of implementing an early childhood development intervention with HIV-positive women in Malawi: a process evaluation.” 2018-

University of California Los Angeles. Internal Medicine Residency, Global Health Track. Resident Physician. Marguerite Thorp. “Can a brief screening tool identify ART clients at risk of defaulting from treatment? a prospective study in Malawi.” 2018-

University of California Los Angeles. Internal Medicine Residency, Global Health Track. Resident Physician. Adrian Mayo. “Predictors of early ART retention among adults who initiated under Universal Treatment policies in Malawi.” 2018-

University of Colorado Denver. Health and Behavioral Sciences. Doctoral Student. Stephanie Chamberlin. “Exploring the association between education and ART retention in rural Malawi.” 2017-

University of California Los Angeles. Fogarty GloCal Fellow. Medical Student. Ogechukwu Offorjebe. “Examining the feasibility and acceptability of HIV self-test kits for index testing among HIV+ clients and their partners in Malawi: A mixed methods study.” 2017-18

College of Medicine, Malawi. MPH Student. Khumbo Phiri. “The role of lay cadre in ART initiation and retention under Test and Treat in Malawi.” 2017-18

1  
2  
3 Brandeis University. Elisa Morales, Becca Sliwosk, and Melanie Morris (capstone project). “Developing a  
4 funding proposal for Men-to-Men, a gender-transformation and income-generating program for men in  
5 northern Uganda.” 2015 (with 31Bits International)  
6  
7

8 Vanguard University. Medical Anthropology Honors Thesis. Joanna Takegami. “Barriers to Women’s use of  
9 Antiretroviral Therapy in Northern Uganda: Exploring the Role of Structural Violence.” 2011  
10  
11

## 12 **AD HOC REVIEWER**

13  
14 AIDS, JAIDS, JIAS, BMC Public Health, Global Health Action, Culture, Health and Sexuality  
15  
16

## 17 **PROFESSIONAL MEMBERSHIPS**

18 Member, American Public Health Association (APHA), Present

19 Member, American Sociology Association (ASA), Present

20 Member, American Anthropological Association (AAA), Present  
21  
22  
23  
24  
25  
26  
27  
28  
29  
30  
31  
32  
33  
34  
35  
36  
37  
38  
39  
40  
41  
42  
43  
44  
45  
46  
47  
48  
49  
50  
51  
52  
53  
54  
55  
56  
57  
58  
59  
60



OMB No. 0925-0001 and 0925-0002 (Rev. 10/15 Approved Through 10/31/2018)

**THOMAS J. COATES**

eRA COMMONS USER NAME (credential, e.g., agency login): TCOATS

POSITION TITLE: **Professor Emeritus, Division of Infectious Diseases, Department of Medicine  
UCLA David Geffen School of Medicine**

EDUCATION/TRAINING (*Begin with baccalaureate or other initial professional education, such as nursing, include postdoctoral training and residency training if applicable. Add/delete rows as necessary.*)

| INSTITUTION AND LOCATION                        | DEGREE<br>(if applicable) | Completion Date<br>MM/YYYY<br>Y | FIELD OF STUDY           |
|-------------------------------------------------|---------------------------|---------------------------------|--------------------------|
| San Luis Rey College, San Luis Rey, California  | BA                        | 06/1968                         | Philosophy               |
| San Jose State University, San Jose, California | MA                        | 01/1971                         | Psychology               |
| Stanford University, Stanford, California       | PhD                       | 06/1977                         | Counseling<br>Psychology |

**A. Personal Statement**

I am Director of the system-wide University of California Global Health Institute (founded in 2008) and was the Founding Director of the UCLA Center for World Health (founded in 2012) until 2018. In 1986 I co-founded the Center for AIDS Prevention Studies (CAPS) at UCSF and directed it from 1991 to 2003. I was also the founding Director of the UCSF AIDS Research Institute, leading it from 1996 to 2003.

I have substantial expertise in research on HIV prevention among heterosexual men and women in the HIV epidemic in sub-Saharan Africa and in the HIV testing and treatment trials in sub-Saharan Africa, especially Malawi through PEPFAR funding. As Distinguished Research Professor of Medicine, I continue with two NIH and two foundation grants focused in southern Africa. I also continue as a co-investigator on the UCLA-based Center for HIV Identification, Prevention and Treatment Studies (CHIPTS).

I have had extensive experience with large-scale, community-based, multi-site research and implementation projects spanning HIV prevention, care and treatment, and policy. I currently have funding to test and evaluate innovative strategies for bring men in South Africa into HIV testing and treatment, as well as for providing early childhood development training for HIV-infected mothers and their babies in Malawi through support from the Conrad N. Hilton Foundation. We are also in the first year of a 5-year NIH-funded grant to study pre-exposure prophylaxis for pregnant and post-partum women in South Africa.

**B. Positions and Honors**

|    |                |                                                                                                                                                                   |
|----|----------------|-------------------------------------------------------------------------------------------------------------------------------------------------------------------|
| 1  |                |                                                                                                                                                                   |
| 2  |                |                                                                                                                                                                   |
| 3  | 1984 - 2003    | Member, Medical Attending Staff, UCSF Hospitals and Clinics                                                                                                       |
| 4  |                |                                                                                                                                                                   |
| 5  | 1990 - 2003    | Professor, Department of Medicine, UCSF                                                                                                                           |
| 6  |                |                                                                                                                                                                   |
| 7  | 1991 - 2003    | Director, Center for AIDS Prevention Studies, UCSF                                                                                                                |
| 8  |                |                                                                                                                                                                   |
| 9  | 1996 - 2003    | Director, AIDS Research Institute, UCSF                                                                                                                           |
| 10 | 2000           | Elected to the Institute of Medicine (now the National Academy of Medicine)                                                                                       |
| 11 | 2010 - 2014    | Member, Institute of Medicine Board on Global Health                                                                                                              |
| 12 |                |                                                                                                                                                                   |
| 13 | 2003 - 2006    | Professor Step VII, Division of Infectious Diseases, Department of Medicine, David Geffen School of Medicine, UCLA                                                |
| 14 |                |                                                                                                                                                                   |
| 15 | 2003 - Present | Joint Appointment, Department of Medicine, UCSF; Member, Executive Committee, UCLA AIDS Institute                                                                 |
| 16 |                |                                                                                                                                                                   |
| 17 |                |                                                                                                                                                                   |
| 18 | 2003 - 2011    | Director, UCLA Program in Global Health                                                                                                                           |
| 19 |                |                                                                                                                                                                   |
| 20 | 2004 - Present | Joint Appointment, Department of Epidemiology, UCLA School of Public Health                                                                                       |
| 21 |                |                                                                                                                                                                   |
| 22 | 2006 – 2009    | Professor Step IX, Division of Infectious Diseases, Department of Medicine, David Geffen School of Medicine, UCLA                                                 |
| 23 |                |                                                                                                                                                                   |
| 24 | 2006 - 2018    | Michael & Sue Steinberg Endowed Professor of Global AIDS Research, Division of Infectious Diseases, Department of Medicine, David Geffen School of Medicine, UCLA |
| 25 |                |                                                                                                                                                                   |
| 26 |                |                                                                                                                                                                   |
| 27 | 2006 - 2018    | Director, Global Capacity Building Core Center for HIV Identification, Prevention, and Treatment Services, UCLA Semel Neurosciences Institute                     |
| 28 |                |                                                                                                                                                                   |
| 29 |                |                                                                                                                                                                   |
| 30 | 2006 - 2018    | Associate Director for International and Policy Research UCLA AIDS Institute                                                                                      |
| 31 |                |                                                                                                                                                                   |
| 32 | 2009 - 2016    | Co-director, University of California Global Health Institute                                                                                                     |
| 33 |                |                                                                                                                                                                   |
| 34 | 2009 –2018     | Distinguished Professor, Division of Infectious Diseases, Department of Medicine, David Geffen School of Medicine, University of California, Los Angeles          |
| 35 |                |                                                                                                                                                                   |
| 36 | 2011 – 2018    | Director, UCLA Center for World Health at the David Geffen School of Medicine and UCLA Health                                                                     |
| 37 |                |                                                                                                                                                                   |
| 38 | 2016-Present   | Director, University of California Global Health Institute                                                                                                        |
| 39 |                |                                                                                                                                                                   |
| 40 | 2018-Present   | Distinguished Research Professor, Division of Infectious Diseases, UCLA David Geffen School of Medicine                                                           |
| 41 |                |                                                                                                                                                                   |

#### C. Contribution to Science

1. **Combination HIV Prevention including Pre-Exposure Prophylaxis:** I have written extensively and conducted research on combination HIV prevention for MSM in the United States and Latin America and with a variety of populations in sub-Saharan Africa. My writing and research have been influential in shaping thinking about combination prevention, and in demonstrating the importance of considering HIV prevention as a combination of factors, as opposed to any single kind of program.

Joseph Davey D, Bekker LG, Gorbach P, **Coates T**, Myer L. Delivering PrEP to pregnant and breastfeeding women in sub-Saharan africa: The implementation science frontier. AIDS. 2017 Jul 18. doi: 10.1097/QAD.0000000000001604. PubMed PMID: 28723709.

Richter L, Komárek A, Desmond C, Celentano D, Morin S, Sweat M, Chariyalertsak S, Chingono A, Gray G, Mbwambo J, **Coates T**; Reported physical and sexual abuse in childhood and adult HIV risk behaviour in three African countries: findings from Project Accept (HPTN-043). *AIDS and behavior*. 2014; 18(2):381-9. PMID: PMC3796176

**Coates TJ**; An expanded behavioral paradigm for prevention and treatment of HIV-1 infection. *Journal of acquired immune deficiency syndromes (1999)*. 2013; 63 Suppl 2:S179-82. PMID: PMC3943341

**Coates TJ**, Richter L, Caceres C. Behavioural strategies to reduce HIV transmission: how to make them work better. *Lancet*. 2008; 372(9639):669-84. PMID: PMC2702246

2. **HIV Counseling and Testing (HTC):** I have conducted many significant and influential studies in HTC, beginning first with observational studies of the effect of HTC on risk behavior among men who have sex with men (MSM) in San Francisco. I was Principal Investigator for the first randomized controlled trial of HTC in Eastern Africa and the Caribbean, examining the effect of HTC on individual males and females, as well as couples presenting for HTC in Kenya, Tanzania, and Trinidad and Tobago, and these results were reported in *The Lancet* in 2000. I was the Principal Investigator for Project Accept, a cluster randomized trial conducted in South Africa, Zimbabwe, Tanzania, and Thailand, and these results were reported in *Lancet Global Health* in 2015. I also was the Principal Investigator of a randomized trial at Mulago Hospital in Uganda examining the effect of short vs. elaborated counseling on males and females presenting for care, and these results were reported in *Lancet Global Health* in 2014.

**Coates TJ**, Kulich M, Celentano DD, Zelaya CE, Chariyalertsak S, Chingono A, Gray G, Mbwambo JK, Morin SF, Richter L, Sweat M, van Rooyen H, McGrath N, Fiamma A, Laeyendecker O, Piwowar-Manning E, Szekeres G, Donnell D, Eshleman SH; NIMH Project Accept (HPTN 043) study team; Effect of community-based voluntary counselling and testing on HIV incidence and social and behavioural outcomes (NIMH Project Accept; HPTN 043): a cluster-randomised trial. *The Lancet. Global Health*. 2014; 2(5):e267-77. PMID: PMC4131207

van Rooyen H1, McGrath N, Chirowodza A, Joseph P, Fiamma A, Gray G, Richter L, **Coates T**. Mobile VCT: reaching men and young people in urban and rural South African pilot studies (NIMH Project Accept, HPTN 043). *AIDS and behavior*. 2013; 17(9):2946-53. PMID: PMC3597746

Wanyenze RK, Kanya MR, Fatch R, Mayanja-Kizza H, Baveewo S, Szekeres G, Bangsberg DR, **Coates T**, Hahn JA; Abbreviated HIV counselling and testing and enhanced referral to care in Uganda: a factorial randomised controlled trial. *The Lancet. Global Health*. 2013; 1(3):e137-45. PMID: PMC4129546

Mhlongo S, Dietrich J, Otvombe KN, Robertson G, **Coates TJ**, Gray G. Factors associated with not testing for HIV and consistent condom use among men in Soweto, South Africa. *PloS one*. 2013; 8(5):e62637. PMID: PMC3656000

3. **Global Health:** I have contributed to the literature on global health, especially from the perspective of engaging multiple disciplinary perspectives to attend to a variety of global health issues around the world.

Debas HT, **Coates TJ**; The University of California Global Health Institute opportunities and challenges. Infectious disease clinics of North America. 2011; 25(3):499-509, vii. PubMed [journal]PMID: 21896355

Duber HC, **Coates TJ**, Szekeres G, Kaji AH, Lewis RJ; Is there an association between PEPFAR funding and improvement in national health indicators in Africa? A retrospective study. Journal of the International AIDS Society. 2010; 13:21. PMCID: PMC2895577

Maman S, Abler L, Parker L, Lane T, Chirowodza A, Ntongwisangu J, Srirak N, Modiba P, Murima O, Fritz K.A comparison of HIV stigma and discrimination in five international sites: the influence of care and treatment resources in high prevalence settings. Social science & medicine (1982). 2009; 68(12):2271-8. PMCID: PMC2696587

Collins C, Coates TJ, Szekeres G; Accountability in the global response to HIV: measuring progress, driving change. AIDS (London, England). 2008; 22 Suppl 2:S105-111. PMCID: PMC2879260

#### **Complete List of Published Work in MyBibliography:**

<http://www.ncbi.nlm.nih.gov/sites/myncbi/thomas.coates.1/bibliography/40839346/public/?sort=date&direction=descending>

D. Research Support

#### **Ongoing Research Support**

R01MH105534-01A1 (Coates) 07/07/15 – 04/30/20

NIH/NIMH

#### **Bringing South African Men into HIV Counseling and Testing (HCT) and Care**

The objective of this project is to provide evidence-based strategies to improve treatment of HIV+ men through a three-step process: (1) Testing a significant proportion of the population, (2) linkage to care, and (3) maintaining in care a significant proportion of HIV+ individuals to the point of viral suppression. My role is as the Principal Investigator.

UM1 AI068619 (El Sadr) 07/01/14 – 11/30/20

Family Health International

NIH-NIAID

#### **HIV Prevention Trials Network (HPTN) Leadership Group**

The goals of this project are: 1) to develop the HPTN research agenda; 2) to review SWG research plans; 3) to review and approve concept plans; 4) to oversee the discretionary fund; 5) to review and revise HPTN policies and procedures; and 6) to evaluate the performance of the HPTN. My role is as Chair of the Manuscript Review Committee

P30 MH058107 (Shoptaw) 03/01/2017-02/28/2022

NIMH/NIH

1  
2  
3 **Center for HIV Identification, Prevention, and Treatment Services**

4 This project is a P30 and provides center grant services to HIV investigators at UCLA. I am a Co-  
5 Investigator in this center.  
6

7  
8  
9 The Conrad N. Hilton Foundation

01/01/2018-12/31/2020

10 **Delivery of Childhood Development Services as Part of HIV Treatment Services in Malawi**

11 This grant supports the integration of early childhood development services within pre- and post-natal care  
12 for HIV+ mothers in Malawi.  
13  
14

15  
16 R01 MH116771-01A1

09/30/2018-09-29-2023

17 NIMH/NIH

18 **Evaluating the Prep-PP Cascade in HIV-negative Pregnant and Breastfeeding Women in South**  
19 **Africa.**

20 The goal of this project is to test innovative models for delivering PrEP to pregnant and breastfeeding  
21 women age 16 and above in South Africa.  
22

23 **Entertainment Industry Foundation-Charlize Theron Africa Outreach Project** 06/01/2018-  
24 05/30/2021  
25

26 The goal of this project is to create a Youth Leaders Scholarship Fund to support promising young South  
27 Africans to attend South African tertiary education institutions.  
28

29 Bill and Melinda Gates Foundation (Dovel)  
30 12/3/2023

12/4/2019-

31 **Identifying Effective Linkage Strategies for HIVST (IDEaL)**

32 This grant tests the effect of a staged intervention for ART initiation among men in Malawi, whereby  
33 additional interventions are added each month for individuals who have not yet initiated ART.  
34

35 **Completed Research Support**

36  
37 20150025 (Coates)

09/01/15 – 08/31/17

38 Conrad N. Hilton Foundation

39 **Delivery of Early Childhood Development Services as a Part of HIV Treatment Services in Malawi**

40 Pilot grant to assess the feasibility and acceptability, as well as initial outcomes, of supporting Option B+  
41 mothers in Malawi to increase their responsiveness to their children and have positive impacts on early  
42 childhood development (ECD).  
43  
44

45 P30 MH58107 (Rotheram-Borus)

02/01/07 - 01/31/17

46 NIH/NIMH

47 **Center for HIV Identification, Prevention, and Treatment Services (CHIPTS)**

48 The mission of the Center for HIV Identification, Prevention, and Treatment Services (CHIPTS) is to  
49 promote collaborative research and education on effective HIV detection, prevention, and treatment  
50 programs for HIV at the societal, community, provider, and individual levels. My role is as the Director  
51 for International Care.  
52  
53  
54  
55  
56  
57  
58  
59  
60

1  
2  
3  
4  
5  
6  
7  
8  
9  
10  
11  
12  
13  
14  
15  
16  
17  
18  
19  
20  
21  
22  
23  
24  
25  
26  
27  
28  
29  
30  
31  
32  
33  
34  
35  
36  
37  
38  
39  
40  
41  
42  
43  
44  
45  
46  
47  
48  
49  
50  
51  
52  
53  
54  
55  
56  
57  
58  
59  
60

For peer review only

# RISA MICHELLE HOFFMAN

## CURRICULUM VITAE

### PERSONAL HISTORY

David Geffen School of Medicine at UCLA  
 Division of Infectious Diseases  
 10833 Le Conte Ave 37-121 CHS  
 Los Angeles, CA 90095  
 rhoffman@mednet.ucla.edu  
 Tele: (310) 825-7225  
 Fax: (310) 825-3632

### EDUCATION

Stanford University 1994, BA  
 University of California Los Angeles 2000, MD  
 Harvard School of Public Health 2000, MPH  
 Internship 2000-2001: Harvard Combined Medicine/Pediatrics Residency Program  
 Residency 2001-2004: Harvard Combined Medicine/Pediatrics Residency Program  
 Fellowship Infectious Diseases: 2005-2008: University of California, Los Angeles

### LICENSURE

California, A85173, 01/31/2021

### BOARD CERTIFICATION/OTHER CERTIFICATION

2004 & 2014 American Board of Internal Medicine  
 2007 & 2017 American Board of Internal Medicine, Infectious Diseases  
 2005 Certification in Travel Medicine from the London School of Hygiene and Tropical Medicine

### PROFESSIONAL EXPERIENCE

#### *Present Position*

|              |                                                                                                             |
|--------------|-------------------------------------------------------------------------------------------------------------|
| 2016-present | Associate Clinical Professor, Division of Infectious Diseases, UCLA                                         |
| 2010-2016    | Assistant Clinical Professor, Division of Infectious Diseases, UCLA Medical Center, Los Angeles, California |
| 2008-2010    | Clinical Instructor, Division of Infectious Diseases, UCLA Medical Center, Los Angeles, California          |

#### *Previous Positions*

|           |                                                                                                                      |
|-----------|----------------------------------------------------------------------------------------------------------------------|
| 2005-2008 | Fellow in Infectious Diseases, UCLA Medical Center, Los Angeles, California                                          |
| 2001-2004 | Resident Physician, Internal Medicine, Brigham and Women's Hospital, Boston, Massachusetts                           |
| 2001-2004 | Resident Physician, Pediatrics, Boston Children's Hospital and Massachusetts General Hospital, Boston, Massachusetts |
| 2000-2001 | Intern, Internal Medicine, Brigham and Women's Hospital, Boston, Massachusetts                                       |
| 2000-2001 | Intern, Pediatrics, Boston Children's Hospital and Massachusetts General Hospital, Boston, Massachusetts             |



#### PROFESSIONAL ACTIVITIES & MEMBERSHIPS

|              |                                                                                                                                                                                                                                |
|--------------|--------------------------------------------------------------------------------------------------------------------------------------------------------------------------------------------------------------------------------|
| 2018-present | Interim Director, Global Health Education and Research Program, David Geffen School of Medicine at UCLA                                                                                                                        |
| 2016-present | Co-Director UCLA AIDS Institute/CFAR International Health Services and Policy Research Program Section                                                                                                                         |
| 2015-present | Associate Program Director, UCLA Infectious Diseases Fellowship Training Program                                                                                                                                               |
| 2013-present | Advisory Board Member for the University of California Global Health Institute GloCal Health Fellowship                                                                                                                        |
| 2009-present | Research Co-Director, Partners in Hope Malawi and UCLA Research Collaboration                                                                                                                                                  |
| 2009-present | Investigator, AIDS Clinical Trials Group (ACTG) and Maternal Child Adolescent Network (IMPAACT)                                                                                                                                |
| 2009-present | HIV Clinical Consultant, To Help Everyone Clinic in Los Angeles, California                                                                                                                                                    |
| 2009-present | Ad hoc Peer Reviewer (AIDS Care, International Journal of STD and AIDS, BMC Women's Health, American Society of Tropical Medicine and Hygiene, Journal of Infectious Diseases, International Health, JIAS)                     |
| 2007-present | Member, Infectious Diseases Society of America (IDSA)                                                                                                                                                                          |
| 2016-2018    | Committee Member, Antiretroviral Therapy Strategies (ARTs), AIDS Clinical Trials Group                                                                                                                                         |
| 2008-2016    | Founder/Program Director, Sustainable Nutrition for Orphans and Vulnerable Children in Malawi, Central Africa: Provides education on nutrition and sustainable food sources for families caring for orphans in northern Malawi |
| 2014-2016    | Committee Lead, Infectious Diseases Quality Improvement M&M Program                                                                                                                                                            |
| 2011-2016    | Committee Member, AIDS Clinical Trials Group <i>Women's Health Inter-network Scientific Committee (WHISC)</i>                                                                                                                  |
| 2007-2013    | Founder/Program Co-Director, UCLA resident physician elective training program in Malawi, Africa                                                                                                                               |
| 2010-2013    | Co-Director, UCLA Program in Global Health and Global Health Education Program for the David Geffen School of Medicine at UCLA                                                                                                 |
| 2008-2012    | Faculty for 'Multidisciplinary Approach to Global Health' elective course for first and second year medical students at UCLA                                                                                                   |
| 2007-2012    | Committee Member, American Society of Tropical Medicine and Hygiene Education Committee                                                                                                                                        |
| 2005-2012    | Advisory Board Member, UCLA Medicine/Pediatrics Residency Training Advisory Board                                                                                                                                              |
| 2005-2011    | Interviewer, UCLA Medicine/Pediatrics Residency Training Program                                                                                                                                                               |
| 2006-2008    | Faculty Group Leader, Problem Based Learning Microbiology Block for second year medical students at UCLA                                                                                                                       |
| 2006-2008    | Creator/Organizer, UCLA Infectious Diseases Core Curriculum Program                                                                                                                                                            |

#### HONORS AND AWARDS

|      |                                                                                    |
|------|------------------------------------------------------------------------------------|
| 2012 | David Geffen School of Medicine Award for Excellence in Education                  |
| 2011 | Nomination for the Consortium of Universities for Global Health Early Career Award |
| 2009 | Nomination for UCLA Faculty Teaching Award                                         |



1  
2  
3  
4  
5  
6  
7  
8  
9  
10  
11  
12  
13  
14  
15  
16  
17  
18  
19  
20  
21  
22  
23  
24  
25  
26  
27  
28  
29  
30  
31  
32  
33  
34  
35  
36  
37  
38  
39  
40  
41  
42  
43  
44  
45  
46  
47  
48  
49  
50  
51  
52  
53  
54  
55  
56  
57  
58  
59  
60

2007 Nomination for UCLA Fellow Teaching Award  
 2006 Nomination for UCLA Fellow Teaching Award  
 2000 Elected to the UCLA chapter of the Alpha Omega Alpha Honor Society  
 2000 Janet M. Glasgow Memorial Achievement Citation for Academic Achievement at the UCLA School of Medicine  
 2000 John M. Adams Award for Excellence in Pediatrics, UCLA School of Medicine  
 2000 Edith and Carl Lasky Memorial Award for Outstanding Research Achievement, UCLA School of Medicine  
 1999 Longmire Surgical Medal for outstanding performance in surgical clerkships, awarded by the Department of Surgery, UCLA School of Medicine  
 1999 Charles Wacker Summer Research Fellowship, UCLA School of Medicine  
 1994 Elected to the Stanford Chapter of Phi Beta Kappa  
 1994 Elected to the Stanford Cap and Gown Women's Honor Society  
 1994 Recipient of the Joshua Lederberg Award for Outstanding Academic Achievement in Human Biology

#### LECTURES AND PRESENTATIONS

“Management of Febrile Neutropenia” Presented as part of the UCLA Division of Infectious Diseases Core Curriculum Program. Los Angeles, California, November 2013

“Challenges and Successes of EQUIP Malawi” Presented at UCLA Infectious Diseases Grand Rounds. Los Angeles, California, April 2014

“Primary Care Issues in HIV Care” Presented at the UCLA Department of Medicine housestaff curriculum. Los Angeles, California, May 2014

“A Case of Multi-Class HIV Resistance” Presented at the UCLA HIV/Hepatitis C Case Conference Series, Los Angeles, California, May 2014

“Evidence Based Managed of Osteomyelitis” Presented at the UCLA Division of Infectious Diseases Case Conference Series, Los Angeles, California, June 2014

“Responding to Viral Load: A Primer for Malawi Clinical Mentors” Presented at a PEPFAR EQUIP Clinical Training Meeting in Malawi, Africa, January 2015

“Clinical Pearls in the Management of HIV/AIDS”. Presented at the UCLA Internal Medicine Resident Core Curriculum Conference Series, Los Angeles, California, February 2015

“Quality Improvement in ID Care at UCLA: Lessons Learned from M&M” Presented at the UCLA Division of Infectious Diseases Core Conference Series, Los Angeles, California, April 2015

1  
2  
3  
4  
5 “Health & Safety Overseas: An orientation for medical students” Presented at the UCLA Global  
6 Health Education Medical Student Orientation Program, Los Angeles, California, April 2015  
7

8  
9 “ID Mimics”. Presented at the UCLA ID Fellow Core Curriculum Series, Los Angeles, California,  
10 May 2015  
11

12  
13 “Quality Improvement on the Infectious Diseases Service: Transition of Care.” Presented at the UCLA  
14 Division of Infectious Diseases Case Conference, Los Angeles, California, June 2015  
15

16  
17 “Quality Improvement on the Infectious Diseases Service: Notes and Documentation.” Presented at the  
18 UCLA Division of Infectious Diseases Case Conference, Los Angeles, California, December 2015  
19

20  
21 “Quality Improvement on the Infectious Diseases Service: HIV Care”. Presented at the UCLA  
22 Division of Infectious Diseases Case Conference, Los Angeles, California, February 2016  
23

24  
25 “Multi-month scripting to achieve improved outcomes in EQUIP”. Presented at the EQUIP annual  
26 meeting, Johannesburg, South Africa March 2016  
27

28  
29 “Clinical Management of HIV/AIDS for the Primary Care Resident”. Presented at the UCLA Internal  
30 Medicine Resident Core Curriculum Conference Series, Los Angeles, California, April 2016  
31

32  
33 “Update on Option B+ in Malawi”. Presented to the Women’s Health Committee of the AIDS Clinical  
34 Trials Group, Los Angeles, California, April 2016  
35

36  
37  
38 EQUIP Malawi: A Partnership for HIV Care in Malawi. Presented at Harbor UCLA Infectious  
39 Diseases Grand Rounds, Los Angeles, California, July 2016  
40

41  
42 Speaker, Infectious Diseases Career Panel for Medical Students at the David Geffen School of  
43 Medicine. Los Angeles, September 2016  
44

45  
46 Systemwide Case Conference Faculty Discussant for the MultiCampus Infectious Diseases Fellowship  
47 Program. Presented at the VA Hospital, Los Angeles, California, December 2016  
48

49  
50 “Introduction to Global HIV Treatment in Resource Poor Settings,” Lecturer for the UCLA School of  
51 Public Health, February 2018, Los Angeles  
52

53  
54 UCLA Division of Infectious Diseases, Journal Club Faculty Discussant, MDR TB Treatment, March  
55 2018, Los Angeles  
56

1  
2  
3  
4  
5 Faculty Panelist. Global Health Career Night for the David Geffen School of Medicine. November  
6 2018, Los Angeles  
7

8  
9 West LA VA Internal Medicine Grand Rounds Speaker: "The Intersection of HIV and Non-  
10 Communicable Diseases in Resource-Limited Settings" April 2019, Los Angeles  
11

12  
13 "Qualitative Client and Provider Experiences with Multi-Dispensing for HIV in Malawi and Zambia".  
14 Presented as part of the CQUIN Consortium. Webinar, April 2019  
15

16  
17 "Introduction to the Global Health Program". Presented as part of the DGSOM Global Health  
18 Selective, September 2019, Los Angeles  
19

## 20 21 PUBLICATION/BIBLIOGRAPHY

### 22 23 RESEARCH PAPERS

#### 24 25 **RESEARCH PAPERS (PEER REVIEWED)**

26  
27 **Hoffman RM**, Umeh OC, Garris C, Givens N, Currier JS. Evaluation of Sex Differences of  
28 Fosamprenavir (With and Without Ritonavir) in HIV-infected Men and Women. *HIV Clin Trials*.  
29 2007;8(6):371-380.  
30

31  
32  
33 **Hoffman RM**, AboulHosn J, Child JS, Pegues DA. Bartonella Endocarditis in Complex Congenital  
34 Heart Disease. *Congenit Heart Dis*. 2007;2(1):79-84.  
35

36  
37 Black V, **Hoffman RM**, Sugar CA, Menon P, Venter FWD, Currier JS, Rees H. Safety and Efficacy  
38 of Initiating Highly Active Antiretroviral Therapy in an Integrated Antenatal and HIV Clinic in  
39 Johannesburg, South Africa. *J Acquir Immune Defic Syndr*. 2008;49(3):276-81. PMC2893046.  
40

41  
42 **Hoffman RM**, Black V, Technau K, van der Merwe KJ, Currier JS, Coovadia A, Chersich M. Effects  
43 of Highly Active Antiretroviral Therapy Duration and Regimen on Risk for Mother-to-Child  
44 Transmission of HIV in Johannesburg, South Africa. *J Acquir Immune Defic Syndr*. 2010;54(1):35-  
45 41. PMC2880466.  
46

47  
48 Pilotto JH, Velasque L, Khalili R, Ismerio R, Veloso VG, Grinsztejn B, Morgado MG, Watts DH,  
49 Currier JS, **Hoffman RM**. Maternal Outcomes after HAART for Prevention of Mother-to-Child  
50 Transmission in HIV-infected Women in Brazil. *Antivir Ther*. 2011;16(3):349-56. PMC3437753.  
51

52  
53 Hoffman RM, Jamieson BD, Bosch RJ, Currier JS, Kitchen CMR, Schmid I, Zhu Y, Bennett K,  
54 Mitsuyasu R. Baseline Immune Phenotypes and CD4+ T Lymphocyte Responses to Antiretroviral  
55  
56  
57  
58  
59

1  
2  
3 Therapy in Younger versus Older HIV-infected Individuals. *J Clin Immunol*. 2011;31(5):873-81.  
4 PMC3194061.  
5  
6

7 Van der Merwe J, Hoffman RM, Black V, Chersich M, Coovadia A, Rees H. Birth outcomes in South  
8 African Women Receiving Highly Active Antiretroviral Therapy: a Retrospective Observational  
9 Study. *J Int AIDS Soc*. 2011;14:42. PMC3163172.  
10

11 Mindry D, Wagner G, Lake JE, Smith A, Linnemayr S, Quinn M, **Hoffman RM**. Fertility Desires  
12 Among HIV-infected Men and Women in Los Angeles County: Client Needs and Provider  
13 Perspectives; *Matern Child Health J*. 2013 May;17(4):593-600. PMC N/A.  
14

15 Burke Z, Chen J, Conceicao C, **Hoffman R**, Miller L, Taela A, DeUgarte DA. Evaluation of  
16 Preoperative and Intraoperative RBC Transfusion Practices in Maputo Central Hospital, Mozambique.  
17 *Transfusion*. 2013 May 21. doi: 10.1111/trf.12252. PMC3751985.  
18

19 **Hoffman RM**, Leister E, Kacanek D, Shapiro DE, Read JS, Bryson Y, Currier JS. Biomarkers from  
20 late pregnancy to six weeks postpartum in HIV-infected women who continue versus discontinue  
21 antiretroviral therapy after delivery. *JAIDS*. 2013 May 8. PMC3868443.  
22

23 Jaganath D, Mulenga C, **Hoffman R**, Hamilton J, Boneh G. This is My Story: Participatory  
24 Performance for HIV and AIDS Education at the University of Malawi. *Health Education Research*.  
25 2013 Sep 18. PMC4155417.  
26

27 Kawale P, Mindry D, Stramotas S, Chilikh P, Phoya A, Henry K, Elashoff D, Jansen P, **Hoffman R**.  
28 Factors associated with desire for children among HIV-infected women and men: A quantitative and  
29 qualitative analysis from Malawi and implications for the delivery of safer conception counseling.  
30 *AIDS Care*. 2013 Jun;26(6). PMC3943633.  
31

- 32 1. Iroezi N, Mindry D, Kawale P, Chikowi G, Jansen P, **Hoffman R**. A qualitative analysis of the  
33 barriers and facilitators to receiving care in a prevention of mother-to-child program in Nkhoma,  
34 Malawi. *Afr J Reprod Health*. 2013 Dec;17(4). PMC4361063.  
35
- 36 2. Russell E, Mohammed T, Smeaton L, Jorowe B, MacLeod I, **Hoffman R**, Currier JS, Moyo S,  
37 Essex M, Lockman S. Immune activation markers in peripartum women in Botswana: association  
38 with feeding strategy and maternal morbidity. *PLoS One*. 2014 Mar 21. PMC3962339.  
39
- 40 3. Reddy D, Njala J, Stocker P, Schooley A, Flores M, Tseng C-H, Pfaff C, Jansen P, Mitsuyasu RT,  
41 **Hoffman RM**. High-risk human papillomavirus in HIV-infected women undergoing cervical  
42 cancer screening in Lilongwe, Malawi: A pilot study. *International Journal of STDS and AIDS*,  
43 2014 Jun 13. PMC4363075.  
44
- 45 4. Kamuyango A, Hirschhorn L, Wang W, Jansen P, **Hoffman R**. One-Year Outcomes of Women  
46 Started on Antiretroviral Therapy during Pregnancy before and after the Implementation of Option  
47 B+ in Malawi: A Retrospective Chart Review from Three Facilities. *World Journal of AIDS*. 2014  
48 Sept;4(3). PMC4356991.  
49
- 50 5. Shull H, Tymchuk C, Grogan T, Hamilton J, Friedman J, **Hoffman RM**. Evaluation of the UCLA  
51 Department of Medicine Malawi Global Health Clinical Elective: Lessons from the First Five  
52 Years. *Am J Trop Med Hyg*. 2014 Sep 15. PMC4228879.  
53  
54  
55  
56  
57  
58  
59

6. Hoffman JC, Anton PA, Baldwin GC, Elliott J, Anisman-Posner D, Tanner K, Grogan T, Elashoff D, Sugar C, Yang OO, **Hoffman RM**. Seminal Plasma HIV-1 RNA Concentration is Strongly Associated with Altered Levels of Seminal Plasma Interferon Gamma, Interleukin-17, and Interleukin-5. *AIDS Res Hum Retroviruses*. 2014 Oct 2. PMC4208556.
7. Menon P, **Hoffman R**, Black V. Characteristics of HIV-infected women on antiretroviral therapy who develop preeclampsia in South Africa: A Case Series. *The Journal of Global Health*. 2014;4(2). PMC N/A.
8. Cheng Q, Engelage E, Grogan T, Currier JS, and **Hoffman RM**. Who provides primary care? A cross-sectional survey of HIV patients and providers in a Los Angeles clinic. *AIDS Clinical Research*. 27 Oct 2014;5(11). PMC4409003.
9. Kawale P, Mindry D, Phoya A, Jansen P, **Hoffman RM**. Provider attitudes about childbearing and knowledge of safer conception at two HIV clinics in Malawi. *Reproductive Health*. 2015 Mar 7;12(1):17. PMC4355153.
10. Yeatman S, **Hoffman RM**, Chilungo A, Lungu S, Namadingo H, Chimwaza A, and Trinitapoli JA. Health-seeking behavior and symptoms associated with early HIV infection: Results from a population-based cohort in southern Malawi. *JAIDS*. 2015 May 1;69(1):126-30. PMC4422188.
11. **Hoffman RM**, Jaycocks A, Vardavas V, Wagner G, Lake JE, Mindry D, Currier JS, Landovitz R. Benefits of PrEP as an adjunctive method of HIV prevention during attempted conception between HIV-uninfected women and HIV-infected male partners. *Journal of Infectious Diseases, J Infect Dis*. 2015 Jun 19. PMC4621256.
12. Lake JE, **Hoffman RM**, Tseng CH, Wilhalme HM, Currier JS. Success of Standard Dose Vitamin D Supplementation in Treated HIV Infection. *Open Forum Infect Dis*. 2015 May 15;2(2). PMC4462892.
13. Chipungu C, Veltman JA, Jansen P, Chiliko P, Lossa C, Namarika D, Benner B, **Hoffman RM**, Bristow CC, Klausner JD. Feasibility and Acceptability of Cryptococcal Antigen Screening and Prevalence of Cryptocococemia in Patients Attending a Resource-limited HIV/AIDS clinic in Malawi. *Journal of the International Association of Providers of AIDS Care, J Int Assoc Provid AIDS Care*. 2015 Jul 2. PMC N/A.
14. Coelho L, Cardoso SW, Luz PM, **Hoffman RM**, Mendonca L, Veloso VG, Currier JS, Grinsztejn B, Lake JE. Vitamin D3 supplementation in HIV infection: effectiveness and associations with antiretroviral therapy. *Nutr J*. 2015 Aug 18: 14. PMC4538921.
15. **Hoffman RM**, Lake JE, Wilhame H, Tseng CH, Currier JD. Vitamin D levels and markers of inflammation and metabolism in HIV-infected individuals on suppressive antiretroviral therapy. *AIDS Res and Human Retroviruses* 2016 March;32(3). PMC4779972.
16. Herbst de Cortina S, Arora G, Wells T, **Hoffman RM**. Evaluation of a Structured Predeparture Orientation at the David Geffen School of Medicine's Global Health Education Programs. *Am J Trop Med Hyg*. 2016 Mar 2;94(3). PMC4775891.

17. Jordan J, **Hoffman R**, Arora G, Coates W. Activated learning: providing structure in global health education at the David Geffen School of Medicine at the University of California, Los Angeles – a pilot study. *BMC Medical Education*. 2016 Feb 16. PMC4755030.
18. Wagner GJ, Linnemayr S, Ghosh-Dastidar B, Currier JD, **Hoffman R**, Schneider S. Supporting Treatment Adherence Readiness through Training (START) for patients with HIV on antiretroviral therapy: a study protocol for a randomized controlled trial. *Trials*. 2016 March 24;17(1). PMC4806419.
19. Arora G, Perkins K, **Hoffman RM**. Optimizing global health electives through partnerships: A pilot study of pediatric residents. *Academic Pediatrics*. 2015 Sept-Oct;15(5). PMC N/A.
20. Chien E, Phiri K, Schooley S, Chivwala M, Hamilton J, **Hoffman RM**. Successes and Challenges of HIV Mentoring in Malawi: The Mentee Perspective. *PLoS One*. 2016 Jun 18;11(6). PMC4924818.
21. Schooley A, Kamudumuli P, Vangala S, Tseng CH, Soko C, Parent J, Phiri K, Jahn A, Namarika D, **Hoffman RM**. CD4 Variability in Malawi: Implications for Use of a CD4 Threshold of 500 Cells/mm<sup>3</sup> Versus Universal Eligibility for Antiretroviral Therapy. *Open Forum Infectious Diseases*. 2016 Aug 29;3(3). PMC5047419.
22. Hemarajata P, Baghdadi JD, **Hoffman R**, Humphries RM. *Burkholderia pseudomallei*: Challenges for the Clinical Microbiology Laboratory. *J Clin Microbiol* 2016 Dec;54(12):2866-2873. PMC5121373.
23. Pfaff C, Scott V, **Hoffman R**, Mwangomba B. You can treat my HIV – But can you treat my blood pressure? Availability of integrated HIV and non-communicable disease care in northern Malawi. *Afr J Prim Health Care Fam Med*. 2017 Feb 15;9(1):e1-e8. PMC5320467.
24. Gibb J, Chitsulo J, Chipungu C, Chivwara M, Schooley A, **Hoffman RM**. Supporting Quality Data Systems: Lessons Learned from Early Implementation of Routine Viral Load Monitoring at a Large Clinic in Lilongwe, Malawi. *Clinical Research in HIV AIDS and Prevention*. 2017 Mar 14;2(4). PMC5502771
25. Arora G and **Hoffman RM**. Development of an HIV Postexposure Prophylaxis (PEP) Protocol for Trainees Engaging in Academic Global Health Experiences. *Acad Med*. 2017 Apr 25. PMC28445222.
26. **Hoffman RM**, Phiri K, Parent J, Grotts J, Elashoff D, Kawale P, Yeatman S, Currier JS, Schooley A. Factors associated with retention in Option B+ in Malawi: a case control study. *J Int AIDS Soc*. 2017 Apr 27;20(1):1-8. PMC28453243.
27. Currier JS, Britto P, **Hoffman RM**, Brummel S, Masheto G, Joao E, Santos B, Aupibul L, Losso M, Pierre MF, Weinberg A, Gnanashanmugam D, Chakhtoura N, Klingman K, Browning R, Coletti A, Mofenson L, Shapiro D, Pilotto J. Randomized Trial of Stopping or Continuing ART among Postpartum Women with Pre-ART CD4  $\geq$  400 cells/mm<sup>3</sup> (PROMISE 1077HS). *PLoS One*. 2017 May 10;12(5):e0176009. PMC28489856.
28. **Hoffman R**, Bardon A, Rosen S, Fox M, Kalua T, Xulu T, Taylor A, Sanne I. Varying intervals of antiretroviral medication dispensing to improve outcomes for HIV patients (The INTERVAL



- Study): study protocol for a randomized controlled trial. *Trials*. 2017 Oct 13;18(1):476. PMC29029644.
29. Judson SD, LeBreton M, Fuller T, **Hoffman RM**, Njabo K, Brewer TF, Dibongue E, Diffo J, Kameni JF, Loul S, Nchinda GW, Njouom R, Nwobegahay J, Takuo JM, Torimiro JN, Wade A, Smith TB. Translating Predictions of Zoonotic Viruses for Policymakers. *Ecohealth*. 2017 Dec 11. PMC29230614.
30. Fatti G, Ngorima-Mabhena N, Chirowa F, Chirwa B, Takarinda K, Tafuma TA, Mahachi N, Chikodzore R, Nyadundu S, Ajayi CA, Mutasa-Apollo T, Mugurungi O, Mothibi E, **Hoffman RM**, Grimwood A. The effectiveness and cost-effectiveness of 3- vs. 6-monthly dispensing of antiretroviral treatment (ART) for stable HIV patients in community ART-refill groups in Zimbabwe: study protocol for a pragmatic, cluster-randomized trial. *Trials*. 2018 Jan 29;19(1):79. PMC29378662.
31. Caplan MR, Phiri K, Parent J, Phoya A, Schooley A, **Hoffman RM**. Provider Perspectives on Barriers to Reproductive Health Services for HIV-Infected Clients in Central Malawi. *Clinical Obstetrics, Gynecology and Reproductive Medicine*. 2018 Feb 12;4(1). PMC6391881.
32. Canan T, **Hoffman RM**, Schooley A, Boas Z, Schwab K, Kahn D, Shih R, Phiri K, Parent J, Banda BA, Chagoma R, Chipungu C, Pool K-L. Training Course in Focused Assessment with Sonography for HIV/TB in HIV Prevalent Medical Centers in Malawi. *Journal of Global Radiology*. 2018 March;4(1). PMC N/A.
33. Rough K, Seage GR, Williams PL, Hernandez-Diaz S, Huo Y, Chadwick EG, Currier JS, **Hoffman RM**, Barr E, Shapiro DE, Patel K; PHACS and the IMPAACT P1025 Study Teams. Birth Outcomes for Pregnant Women with HIV Using Tenofovir–Emtricitabine. *New England Journal of Medicine*. 2018 April 26;378(17):1593-1603. PMC5984044
34. Dovel K, Shaba F, Nyirenda M, Offorjebe OA, Balakasi K, Phiri K, Nichols B, Tseng C-H, Bardon A, Ngona K, **Hoffman R**. Evaluating the Integration of HIV Self-Testing Into Low-Resource Health Systems: Study Protocol for a Cluster-Randomized Control Trial from EQUIP Innovations. *Trials*. 2018 Sept 17;19(1). PMC6142354
35. Schwab K, **Hoffman RM**, Phiri L, Kahn D, Longwe L, Banda BA, Gama K, Chimombo M, Shih R, Schooley A, Pool K-L. Remote Training and Oversight of Sonography for Human Immunodeficiency Virus–Associated Tuberculosis in Malawi. *Journal of the American College of Radiology*. 2018 Sept 26. PMC6540803
36. Hubbard J, Kakwesa G, Nyirenda M, Mwambene J, Bardon A, Balakasi K, Dovel K, Kalua T, **Hoffman RM**. Towards the Third 90: Improving Viral Load Testing with a Simple Quality Improvement Program in Health Facilities in Malawi. *Int Health*. 2018 Nov 1. PMC Pending
37. Moucheraud C, Chasweka D, Nyirenda M, Schooley A, Dovel K, **Hoffman RM**. Simple Screening Tool to Help Identify High-Risk Children for Targeted HIV Testing in Malawian Inpatient Wards. *J Acquir Immune Def Syndr*. 2018 Nov 1; 79(3). PMC Pending
38. **Hoffman RM**, Brummel SS, Britto P, Pilotto JH, Masheto G, Aupibul L, Joao E, Purswani MU, Buschur S, Flore Pierre M, Coletti A, Chakhtoura N, Klingman KL, Currier JS for the 1077HS

- 1  
2  
3 PROMISE Team. Adverse Pregnancy Outcomes among Women who Conceive on Antiretroviral  
4 Therapy. *Clin Infect Dis* 2018 June 1. PMC6321847  
5
- 6  
7 39. Nhassengo P, Cataldo F, Magaco A, **Hoffman RM**, Nerua L, Saide M, Cuco R, Hoek R, Mbofana  
8 F, Couto A, Gudo E, Chicumbe S, Dovel K. Barriers and facilitators to the uptake of Test and  
9 Treat in Mozambique: a qualitative study on patient and provider perceptions. *PLOS One*. 2018  
10 Dec 26; 13(12). PMC6306230  
11
- 12 40. Magaço A, Dovel K, Cataldo F, Nhassengo P, **Hoffman RM**, Nerua L, Tique J, Saide M, Couto  
13 A, Mbofana F, Gudo E, Cuco R, Chicumbe S. 'Good health' as a barrier and facilitator to ART  
14 initiation: a qualitative study in the era of test-and-treat in Mozambique. *Culture, Health and*  
15 *Sexuality*. 2018. PMC Pending  
16
- 17 41. **Hoffman RM**, Konstantia A, Brummel S, Saidi F, Violari A, Dula D, Mave V, Fairlie L, Gerhard  
18 T, Kamateeka M, Chipato T, Chi B, Stranix-Chibanda L, Nematadzira T, Moodley D,  
19 Bhattacharya D, Gupta A, Coletti A, McIntyre JA, Klingman KL, Chakhtoura N, Shapiro DE,  
20 Folwer MG, Currier JS. Maternal health outcomes among HIV-infected breastfeeding women with  
21 high CD4 counts: results of a treatment strategy trial. *HIV Clinical Trials* 2018 Dec;19 (6).  
22 PMC6428202 [Available on 2019-12-01]  
23
- 24  
25 42. Murnane PM, Bacchetti P, Currier JS, Brummel S, Okochi H, Phung N, Louie A, Kuncze K,  
26 **Hoffman RM**, Nematadzira T, Soko DK, Owor M, Saidi F, Flynn PM, Fowler MG, Gandhi M.  
27 Tenofovir concentrations in hair strongly predict virologic suppression in breastfeeding women.  
28 *AIDS* 2019 Apr 22. [Epub ahead of print]. PMC Pending  
29
- 30  
31 43. Shaba F, Offorjebe OA, Phiri K, Lungu E, Kalande, P, Nyirenda M, Gupta S, **Hoffman RM**,  
32 Dovel K. Perceived acceptability of a facility-based HIV self-test intervention in outpatient  
33 waiting spaces among adult outpatients in Malawi: A formative study. *J Acquir Immune Defic*  
34 *Syndr*. 2019 Jul 1;81(3):e92-e94. PMC Pending  
35
- 36  
37 44. Weinberg A, Huo Y, Kacanek D, Patel K, Watts DH, Wara D, **Hoffman RM**, Klawitter J,  
38 Christians U; for IMPAACT P1025 Team. Markers of spontaneous preterm delivery in women  
39 living with HIV: relationship with protease inhibitors and Vitamin D. *J Acquir Immune Defic*  
40 *Syndr*. 2019 May 28. [Epub ahead of print]. PMC Pending  
41
- 42  
43 45. McBride K, Parent J, Mmanga K, Chivwala M, Nyirenda MH, Schooley A, Mwambene JB, Dovel  
44 K, Lungu E, Balakasi K, **Hoffman RM**, Moucheraud C. ART Adherence Among Malawian Youth  
45 Enrolled in Teen Clubs: A Retrospective Chart Review. *AIDS Behav*. 2019 July 10. PMC Pending  
46
- 47 46. Le C, Britto P, Brummel SS, **Hoffman RM**, Li JZ, Flynn PM, Taha TE, Coletti A, Fowler MG,  
48 Bosch RJ, Gandhi RT, Klingman KL, McIntyre JA, Currier JS. Time to Viral Rebound and Safety  
49 after Antiretroviral Treatment Interruption in Postpartum Women Compared to Men. *In Press*  
50 *AIDS* 2019, August 1. PMC Pending  
51  
52  
53  
54  
55  
56  
57  
58  
59  
60



OMB No. 0925-0001 and 0925-0002 (Rev. 09/17 Approved Through 03/31/2020)

**MICHAL KULICH**

eRA COMMONS USER NAME (credential, e.g., agency login):

POSITION TITLE: Associate Professor of Statistics

EDUCATION/TRAINING (*Begin with baccalaureate or other initial professional education, such as nursing, include postdoctoral training and residency training if applicable. Add/delete rows as necessary.*)

| INSTITUTION AND LOCATION                     | DEGREE<br>(if applicable) | Completion Date<br>MM/YYYY | FIELD OF STUDY   |
|----------------------------------------------|---------------------------|----------------------------|------------------|
| Charles University, Prague                   | M.S.                      | 9/1991                     | Math. Statistics |
| Limburgs Universitair Centrum,<br>Diepenbeek | M.S.                      | 9/1992                     | Biostatistics    |
| University of Washington, Seattle            | M.S.                      | 9/1995                     | Biostatistics    |
| University of Washington, Seattle            | Ph.D.                     | 10/1997                    | Biostatistics    |

**A. Personal Statement**

I have an extensive past experience with design, conduct and analysis of clinical trials, especially community randomized trials, in the context of HIV prevention research. I served as the Lead Statistician for the Behavioral Working Group within the HPTN in 2000–2003 and as the Protocol Statistician and Steering Committee member for Project ACCEPT (HPTN043) in 2003-2013. I have been also participating in protocol review groups in the HPTN. I was involved in the design of HPTN043, development of data collection procedures, and development and application of data quality control measures. I am a coauthor of 7 research papers on methodology and results of HPTN043. Since 2015, I am a protocol statistician on another community-randomized trial, Zwakala Ndoda Study: Diagnosing, Linking and Maintaining Men in Antiretroviral Treatment in Vulindlela and Greater Edendale Area, KwaZulu-Natal. The current application builds on my past experience with HIV prevention trials.

**B. Positions and Honors****Professional Positions**

1998–2000 Dept. of Probability and Statistics, Charles University, Prague, Czech Rep., Assistant Professor  
 2000–2003 Dept. of Biostatistics, University of Washington, Seattle, Research Assistant Professor  
 2004–2009 Dept. of Probability and Statistics, Charles University, Prague, Czech Rep., Assistant Professor  
 2010–2013 Dept. of Probability and Statistics, Charles University, Prague, Czech Rep., Associate Professor  
 2014– Dept. of Probability and Statistics, Charles University, Prague, Czech Rep., Chair

### Professional Memberships

1995- Member, American Statistical Association  
 1998- Member, Czech Statistical Society  
 2004- Member, International Biometric Society  
 2005- Member, International Society for Clinical Biostatistics

### Honors

1995 Donovan J. Thompson Award, University of Washington, Seattle, WA.  
 1997 Best Written Paper, International Biometric Society, Park City, UT.  
 2001 Bolzano Award, Bernard Bolzano Foundation, Prague, Czech Republic.

## C. Contributions to Science

### Design and conduct of HIV prevention trials

I have an expertise in design, conduct and analysis of large randomized HIV prevention trials. I was a protocol statistician in Project ACCEPT (HPTN043), a community-randomized trial conducted in five African and Asian sites, with HIV incidence calculated from cross-sectional blood samples as the primary endpoint. I designed methods for obtaining population samples by household-probability sampling, participated in data verification, performed analyses and collaborated on publications.

Genberg, B., **Kulich, M.**, Kawichai, S., Modiba, P., Chingono, A., Kilonzo, G., Richter, L., Pettifor, A., Sweat, M. & Celentano, D. HIV risk behaviors in Sub-Saharan Africa and Northern Thailand: Baseline behavioral data from Project Accept. *Journal of AIDS* 2008, 49(3):309-319. PMID: 18845954

Sweat, M., Morin, S., Celentano, D., Mulawa, M., Singh, B., Mbwambo, J., Kawichai, S., Chingono, A., Khumalo-Sakutukwa, G., Gray, G., Richter, L., **Kulich, M.**, Sadowski, A., Coates, T., and the Project Accept study team. Community-based intervention to increase HIV testing and case detection in people aged 16-32 years in Tanzania, Zimbabwe, and Thailand (NIMH Project Accept, HPTN 043): a randomised study. *The Lancet Infectious Diseases* 2011, 11(7), 525-532. PMID: 21546309

Coates, T.J., **Kulich, M.**, Celentano, D.D., Zelaya, C.E., Chariyalertsak, S., Chingono, A., Gray, G., Mbwambo, J.K.K., Morin, S.F., Richter, L., Sweat, M., van Rooyen, H., McGrath, N., Fiamma, A.,

1  
2  
3 Laeyendecker, O., Piwowar-Manning, E., Szekeres, G., Donnell, D., Eshleman, S.H. (2014) Effect of  
4 community-based voluntary counselling and testing on HIV incidence and social and behavioural  
5 outcomes (NIMH Project Accept; HPTN 043): A cluster-randomised trial. *The Lancet Global Health*  
6 2014, 2 (5), e267-e277. PMID: 25103167  
7

8  
9 Salazar-Austin, N., **Kulich, M.**, Chingono, A., Chariyalertsak, S., Srithanaviboonchai, K., Gray, G.,  
10 Richter, L., van Rooyen, H., Morin, S., Sweat, M., Mbwambo, J., Szekeres, G., Coates, T., Celentano, D.  
11 (2017) Age-Related Differences in Socio-Demographic and Behavioral Determinants of HIV Testing and  
12 Counseling in HPTN 043/NIMH Project Accept. *AIDS and Behavior* 2018, 22(2) 569-579. PMID:  
13 28589504  
14

### 15 16 17 **Methods for cross-sectional incidence estimation**

18 I participated in the development of laboratory and statistical methods for estimating HIV incidence from  
19 cross-sectional blood samples. These methods were needed for successful evaluation of the primary  
20 outcome in Project ACCEPT.  
21

22 Laeyendecker, O., Piwowar-Manning, E., Fiamma, A., **Kulich, M.**, Donnell, D., Bassuk, D., Mullis, C.  
23 E., Chin, C., Swanson, P., Hackett, Jr, J., Clarke, W., Marzinke, M., Szekeres, G., Gray, G., Richter, L.,  
24 Alexandre, M. W., Chariyalertsak, S., Chingono, A., Celentano, D. D., Morin, S. F., Sweat, M., Coates,  
25 T., Eshleman, S. H. Estimation of HIV Incidence in a Large, Community-Based, Randomized Clinical  
26 Trial: NIMH Project Accept (HIV Prevention Trials Network 043), *PLoS ONE* 2013, 8:7, e68349. PMID:  
27 23874597  
28

29 Laeyendecker, O., **Kulich, M.**, Donnell, D., Komárek, A., Omelka, M., Mullis, C. E., Szekeres, G.,  
30 Piwowar-Manning, E., Fiamma, A., Gray, R. H., Lutalo, T., Morrison, C. S., Salata, R. A., Chipato, T.,  
31 Celum, C., Kahle, E. M., Taha, T. E., Kumwenda, N. I., Karim, Q. A., Naranbhai, V., Lingappa, J. R.,  
32 Sweat, M. D., Coates, T., Eshleman, S. H. Development of Methods for Cross-Sectional HIV Incidence  
33 Estimation in a Large, Community Randomized Trial. *PLoS ONE* 2013, 8:11, e78818. PMID: 2423605  
34  
35

36 Fogel, J.M., Piwowar-Manning, E., Donohue, K., Cummings, V., Marzinke, M.A., Clarke, W., Breaud,  
37 A., Fiamma, A., Donnell, D., **Kulich, M.**, Mbwambo, J., Richter, L., Gray, G., Sweat, M., Coates, T.,  
38 Eshleman, S. Determination of HIV status in African adults with discordant HIV rapid tests. *Journal of*  
39 *Acquired Immune Deficiency Syndromes* 2015, 69, 430-438. PMID: 25835607  
40  
41

42 Fogel, J.M., Clarke, W., **Kulich, M.**, Piwowar-Manning, E., Breaud, A., Olson, M.T., Marzinke, M.A.,  
43 Laeyendecker O., Fiamma, A., Donnell, D., Mbwambo, J., Richter, L., Gray, G., Sweat, M., Coates, T.J.,  
44 Eshleman, S.H. Antiretroviral drug use in a cross-sectional population survey in Africa: NIMH Project  
45 Accept (HPTN 043). *Journal of Acquired Immune Deficiency Syndromes* 2017, 74, 158-165. PMID:  
46 27828875  
47  
48  
49  
50  
51  
52  
53  
54  
55  
56  
57  
58  
59  
60

# AUGUSTINE T CHOKO

**Institution:** Malawi Liverpool Wellcome Trust Clinical Research Programme

**General Medical Council (or equivalent) registration number** N/A

**Do you currently have personal medical malpractice insurance? (if so, name of insurer)**

N/A

**Project role**

Principal Investigator

## Qualifications

| Degree | Year | Subject                | Awarding Institution |
|--------|------|------------------------|----------------------|
| PhD    | 2018 | Epidemiology           | LSHTM                |
| MSc    | 2012 | Epidemiology           | LSHTM                |
| BSc    | 2009 | Statistics & Computing | University of Malawi |

## Positions held (last ten years)

| Start | End  | Organisation                          | Position title, brief description of responsibilities                                                                        |
|-------|------|---------------------------------------|------------------------------------------------------------------------------------------------------------------------------|
| 2020  | 2024 | Malawi Liverpool Wellcome Trust (MLW) | Wellcome Trust & National Institute for Health Research International Intermediate Fellow                                    |
| 2019  | 2020 | MLW                                   | Protocol Lead; leading design, implementation and write up of a complex primary health clinic randomized trial.              |
| 2015  | 2018 | MLW                                   | Wellcome Trust Fellow in Public Health and Tropical Medicine <ul style="list-style-type: none"> <li>▪ PhD student</li> </ul> |

2013 2015 MLW Research Assistant (Epidemiology)

- Data analysis and publication

2012 2013 MLW Trial Manager

- Leading implementation of a community-based cluster randomized trial (HIV/TB)

2009 2012 MLW Data Manager/Statistician

- Designing and administering study databases
- Preparing data for analysis and data analysis

**GCP training: course provider, date**

NIDA Clinical Trials Network, Obtained 11 November 2016, expires 2019

**Please list any institutions with which you are affiliated to**

Malawi Liverpool Wellcome Trust Clinical Research Programme, London School of Hygiene & Tropical Medicine

**Ethics training: details of training, course provider, date**

**Clinical trials experience: title of trial, role, dates (if multiple, restrict to most recent and most relevant)**

Secondary distribution of HIV self-tests through antenatal and HIV testing services: a pragmatic cluster-randomized trial (STAR-ANC); 2018-2019.

Partner-Provided Self-Testing and Linkage (PASTAL) adaptive multi-arm multi-stage cluster randomized trial; 2016-2017.

Intensified HIV / TB prevention linking home-based HIV testing, including the option of self-testing, with HIV care: a cluster-randomised trial in Blantyre, Malaw, Research Fellow, 2011-2015.

**Other professional experience relevant to role in project**

Experience in handling and analyzing large epidemiological datasets.

**Relevant recent publications (maximum 5)**

1. **Choko AT**, Corbett EL, Stallard N, Maheswaran H, Lepine A, Johnson CC, Sakala D, Kalua T, Kumwenda M, Hayes R, Fielding K. Effect of HIV self-testing alone or with additional

1  
2  
3 .....  
4 interventions including financial incentives on linkage to care or prevention among male  
5 partners of antenatal care attendees in Malawi: An adaptive multi-arm multi-stage cluster  
6 randomised trial. *PLoS Med* 2019 Jan 2;16(1):e1002719.

- 7 2. **Choko AT**, Fielding K, Stallard N, et al. Investigating interventions to increase uptake of HIV  
8 testing and linkage into care or prevention for male partners of pregnant women in antenatal  
9 clinics in Blantyre, Malawi: study protocol for a cluster randomised trial. *Trials*. 2017;18(1):349.
- 10 3. **Choko AT**, Kumwenda MK, Johnson CC, et al. Acceptability of woman-delivered HIV self-testing  
11 to the male partner, and additional interventions: a qualitative study of antenatal care  
12 participants in Malawi. *Journal of the International AIDS Society*. 2017;20(1):21610.
- 13 4. **Choko AT**, MacPherson P, Webb EL, et al. Uptake, Accuracy, Safety, and Linkage into Care over  
14 Two Years of Promoting Annual Self-Testing for HIV in Blantyre, Malawi: A Community-Based  
15 Prospective Study. *PLoS medicine*. 2015;12(9):e1001873.
- 16 5. **Choko AT**, Desmond N, Webb EL, et al. The uptake and accuracy of oral kits for HIV self-testing  
17 in high HIV prevalence setting: a cross-sectional feasibility study in Blantyre, Malawi. *PLoS*  
18 *medicine*. 2011;8(10):e1001102.  
19 .....  
20

# Khumbo Phiri Nyirenda

## CONTACTS

Partners in Hope

PO Box 302, Lilongwe.

Cell: 265882400721/ 265999 840 946

**Email: khumbophiri@gmail.com**

## ACADEMIC QUALIFICATIONS

- I. MPH, University of Malawi, College of medicine, anticipating graduation in 2020
- II. BSOC, Economics, University of Malawi, Chancellor College- February, 2006
- III. Malawi School Certificate of Education (MSCE) Phwezi Girls Sec School-June, 2000

## COURSES/ TRAININGS

- Qualitative research synthesis, university of cape town, faculty of health sciences February 2020
- Qualitative data analysis university of cape town, faculty of health sciences January 2020
- Biomedical Researchers and Staff modules (CITI program \_May 2016)
- Certificate of Attendance in Value chain analysis training by Ron Black from CNFA's farmer to farmer USAID funded program, Washington DC (February 23-27, 2009)
- Output marketing training in grain grading by CNFA/RUMARK facilitated by a North Carolina Agriculture Department officer, held at Natural Resources College (August 25 -28, 2009).
- Certificate of Attendance in a Leadership workshop facilitated by Engineers without Borders (October 26 – 28, 2009).
- Training of trainers course in Business management and technical knowledge by COMESA's ACTESA and IFDC in Lusaka, Zambia (September 6-15, 2010)

## WORK EXPERIENCE

### PARTNERS IN HOPE

**Position:** Implementation Science Manager

**Period:** September 2017 to date

Summary:

The Projects Research Coordinator is responsible for overseeing and implementing all research related activities at Partners in Hope (PIH) and in all program-supported sites. He/she is in charge of monitoring and evaluating projects and ensuring that PIH is accountable to research donors. This person works hand-in-hand with the University of California in Los Angeles (UCLA), Partners in Hope (PIH), the Ministry of Health (MoH) and other partners.

Responsibilities



## 1. Overseeing and implementing all research projects at Partners in Hope and all EQUIP-supported sites

### 2. Research applications, Reviews and Reports.

- Oversee applications for ethical review for the Malawi NHSRC and/or COMREC, including initial and renewal applications, as well as closeout of completed projects.
- Serve as the first line of direct communication with the NHSRC and/or COMREC to advocate for submitted applications.
- Work with UCLA, PIH, MoH and other partners to ensure all research is performed to the highest ethical standards and that data is securely managed.
- Make sure appropriate reporting is provided to the governing bodies (final reports, publications, etc.).
- Oversee submission of abstracts to research meetings.

### 3. Monitoring, Evaluation and Accountability to Donors

- Monitor all research projects and develop donor communications in collaboration with senior leadership, especially the M&E Team.
- Ensure timely production and submission of donor reports.
- Participate in development of strategies for expansion of research.
- Ensure continuous evaluation of projects and staff, including hiring and regular appraisals.

**Period:** December 2012 to March 2016

**Organization:** Partners in Hope

**Position:** Research coordinator

### Description

- Coordinates and administers research study associated activities. Assists in project planning and ensures that pre-established work scope, study protocol and regulatory (ethical review in Malawi and at UCLA) requirements are followed. Oversees and coordinates research staff. Develops and maintains record keeping systems and procedures. My job as Research Coordinator involves these main tasks
  - Assistance developing research proposals, data collection forms, and spreadsheets for organization of data. Develops and maintains record keeping systems and procedures.
  - Ensures the smooth and efficient day to day operation of research and data collection activities; acts as the primary administrative point of contact for EQUIP research staff.
  - Supervision of team of research assistants
  - Assistance with recruitment and coordination of research subjects as appropriate.
  - Supervision and assistance with quality control Data.
- Monitors the progress of research activities; develops and maintains records of research activities and prepares periodic and ad hoc reports as required by investigators, administrators and funding agencies(USAID quarterly reports) and regulatory bodies (NHSRC,UCLA,IRB)



- Assistance with preparing ethical review applications (HSRC) including frequent communication with NHSRC about status of pending applications.

## **I. CARANA COOPERATION**

**Position:** M&E/MIS Assistant

**Period:** November 2010–September 2011

### **Description**

Market Linkages Initiative was a project funded by **USAID** and implemented by ACDI/VOCA and CARANA Corporation. The two key objectives of the project are to strengthen and expand grain bulking systems and to integrate farmers to national and regional markets. My job as an M&E/MIS Specialist involved these main tasks:

- Assisting the M&E specialist in tracking MLI indicators, collecting and verifying information and maintaining PMP reports, work plans and reports(weekly, monthly updates, quarterly and annual) for Malawi activities
- Administering data collection tools to GBC/VACs and capacity building of grantees to keep relevant records and generate M&E reports as stipulated by the Grant agreement.
- Collating , analyzing and reporting in usable forms all data collected form GBC/VAC
- Supporting in the coming up of GIS map for MLI supported GBCs and its associated VACs in Malawi
- Administering M&E data collection tools and supervising M&E data collectors and ensure quality data collection
- Maintaining records of all source documents from grantees and other sources including filled questionnaires and interview reports
- Keeping records of field trip reports and monitor and updating field trip tracker for Malawi based MLI staff
- Undertaking case studies and documenting most significant change stories for selected GBCs/VACs/Farmers to monitor impacts of MLI work
- Maintaining an up to date filing system including project photos
- Ensuring that quality control procedures are met in terms of market data.
- Facilitating dissemination of market information to farmers on a timely and reliable basis using the E-platform
- Providing technical assistance on the E- platform to strategic partners
- Working alongside the new company and assisting/participating in development and deployment team to design and roll out a web to phone MIS platform

- Conducting weekly data checks on approved prices inside E-platform's price flagging module
- Manage a user, market and commodities database

## II. CNFA/RUMARK

**Position:** Monitoring and Evaluation Coordinator

**Period:** January 2009 to October 2010

CNFA/RUMARK implemented the Malawi Agrodealer Strengthening Program funded by AGRA. Its main objective was to develop rural-based, commercially-viable agrodealer networks and to work with agrodealers to improve the management, technical and financial capacity of their enterprises, thereby creating a rural market driven economic environment specifically designed to meet the unique needs of smallholder farmers. My position of as M&E coordinator involved the following tasks

- Monitoring progress of the project activities by doing surveys which included development of survey tools which mostly use participatory methods.
- Monitoring and evaluating the agrodealers performance in terms of sales as well as their financial status.
- Analysis of information on Agrodealer performance
- Verifying and identifying operational and potential agrodealers and recommending them for training to enable them get registered with CNFA
- Organizing promotional activities i.e. lottery competitions with the intention of creating customer database for surveys
- Playing a facilitating role in managing relationships between RUMARK and input supply companies to ensure cordial relationships and partnerships.
- Consolidating and analyzing results across CNFA's programs.
- Conducting training needs assessment for different categories of agrodealers to ensure equal treatment so that their specific needs are taken on board.
- Organizing the Agrodealers Annual Convention.
- Production of monthly as well as interim semi-annual reports for the Project
- Involved in advocating for policies which are conducive for agrodealers' business growth and sustainability through Private-public partnerships which involves working with various stakeholders including Government and civil society organizations.

## Research Abstracts

**Provider perspectives on barriers to reproductive health services for HIV-infected clients**

1  
2  
3 **in Central Malawi:** Khumbo Phiri, Margaret R Caplan , Julie Parent , Ann Phoya , Alan  
4 Schooley, and Risa M. Hoffman, Poster presentation at Interest 2017, Malawi

5  
6 **Barriers to ART uptake experienced by healthy clients in Malawi under Test and Treat:**  
7 Dovel, Kathryn, Khumbo Phiri, Alan Schooley, McDaphton Bellos, Esnart Sanudi, Denis  
8 Chasweka, Risa Hoffman, poster exhibition at the 9th IAS Conference on HIV Science (IAS  
9 2017, in Paris, France, 23-26 July 2017 and Interest 2017 in Malawi).

10  
11 **Facility-level barriers to antiretroviral therapy experienced by men in Malawi:** Dovel,  
12 Kathryn, Khumbo Phiri, Alan Schooley, Misheck Mphande, Mackenzie Chivwara, Risa  
13 Hoffman (poster presentation at interest 2017, Malawi)

14  
15 **Examining Malawi's Rollout of Universal Treatment: Policy Implementation and Provider**  
16 **Perceptions:** Misheck Mphande, Khumbo Phiri, Mackenzie Chivwara, Mike Nyirenda, Alan  
17 Schooley, Rachel Thomas, Risa Hoffman, Kathryn Dovel, (Poster presentation at IAS 2017 in  
18 Paris, France)

19  
20 **Low rates of successful defaulter tracing and re-engagement in care in Option B+ women**  
21 **in Central Malawi.** K. Phiri, J. Parent, T. Mulitswa, A. Schooley, R. Hoffman. Poster  
22 presentation at the International AIDS Society (IAS) conference (Durban, 2016).

23  
24 **The successes and Challenges of collaborating with Health Surveillance Assistants (HSAs)**  
25 **to trace Option B+ defaulters.** Khumbo Phiri Nyirenda, Julie Parent, Risa Hoffman, Alan  
26 Schooley, Temwanani Mulitswa

27  
28 **The Option B+ cascade: Characterizing uptake and retention in a USAID-PEPFAR**  
29 **program in rural Malawi.** Khumbo Phiri, Alan Schooley, Mackenzie Chivwala, Joseph Njala,  
30 Judy Currier, Andreas Jahn, Anteneh Worku, Perry Jansen, Risa Hoffman

31  
32 **Improvements and on-going challenges in exposed infants care at rural sites in Malawi.**  
33 Alan Schooley, Khumbo Phiri, Mackenzie Chivwala, Peter Chilikhoh, Antenneh worku, Risa  
34 Hoffman

35  
36 **Health Surveillance Assistants Can Successfully Perform Defaulter Tracing In Rural**  
37 **Malawi.** Mackenzie Chivwala, Khumbo Phiri, Risa Hoffman, Jimmy Chitsulo, Alan Schooley

38  
39 **Assessing the Potential Impact of Health Surveillance Assistants on HIV Care At The**  
40 **Facility And Community Level.** Mackenzie Chivwala, Khumbo Phiri, Weston Njamwaha,  
41 Peter Chilikhoh, Risa Hoffman, Alan Schooley

42  
43 **Mentee Perspectives on Factors Associated with a Successful HIV Mentorship Program**  
44 Mike Nyrienda, Chiulemu Kussen, Savior Mwandira, Khumbo Phiri, Chiukepo Longwe, Peter  
45 Chilikhoh, Risa Hoffman, Weston Njamwaha, Alan Schooley

46  
47 **Rapid Rollout of Viral Load Testing at Rural Health Facilities in Malawi.** Alan Schooley,  
48 Risa Hoffman, Mike Nyirenda, Savior Mwandira, Weston Njamwaha, Khumbo Phiri, Chifundo  
49 Chipungu, Mackenzie Chivwala, James Kandulu

50  
51 **Increased HIV testing after implementation of an innovative CD4 results reporting system**  
52 **in rural Malawi.** Alan Schooley, Mackenzie Chivwala, Reynier Ter Haar, George Mtonga,  
53

1  
2  
3 Doreen Suwande, Kelvin Rambiki, Chiulemu Kussen, John Hamilton, Khumbo Phiri, Peter  
4 Chilikh, Risa Hoffman, Perry Jansen. Accepted for poster presentation at the 6th South African  
5 AIDS Conference, Durban, South Africa, 18-21 June 2013.  
6

7  
8 **Barriers to Adherence to ART in the Prevention of Mother-to-Child Transmission of HIV:  
9 Option B+ in Nkhoma, Malawi.** Paul Kawale, Alan Schooley, Virginia Tancioco, Danielle  
10 Wickman, Khumbo Phiri, Ella Bwanausi, Risa Hoffman. Accepted for poster presentation at the  
11 6th South African AIDS Conference, Durban, South Africa, 18-21 June 2013.  
12

### 13 MANUSCRIPTS ACCEPTED/PUBLISHED

14  
15  
16 **Successes and Challenges of HIV Mentoring in Malawi: The Mentee Perspective.** E. Chien,  
17 K. Phiri, A. Schooley, M. Chivwala, J. Hamilton, R. Hoffman. PLoS One. 2016 Jun;11(6).  
18

19 **CD4 variability in Malawian adults and implications for universal eligibility.** A.L. Schooley,  
20 P.S. Kamudumuli, S. Vangala, C.H. Tseng, C. Soko, J. Parent, K. Phiri, A. Jahn, D. Namarika,  
21 R. Hoffman. Open Forum Infect Dis. 2016 Aug;3(3).  
22

23  
24 **Provider perspectives on barriers to reproductive health services for HIV-infected clients  
25 in Central Malawi:** Margaret R Caplan, Khumbo Phiri, Julie Parent, Ann Phoya , Alan  
26 Schooley, and Risa M. Hoffman, PLOS ONE.  
27

28 **Factors Associated with Retention in Option B+ in Malawi: A Case Control Study:** Risa M.  
29 Hoffman, khumbo phiri, Julie parent, J Grotts D Elashoff, Paul Kawale, Sara Yeatman, J S  
30 Currier, A Schooley, JIAS.  
31

32  
33 **Training Course in Focused Assessment with Sonography for HIV/TB in HIV Prevalent  
34 Medical Centers in Malawi:** Timothy Canan, R Hoffman, Alan Schooley, Zachary Boas,  
35 Kristin Schwab, Daniel Kahn, Roger Shih, Khumbo Phiri, Julie Parent, Ben Allan Banda, Ronald  
36 Chagoma, Chifundo Chipungu. Kara-Lee Pool, Journal of Global Radiology  
37  
38

### 39 REFEREES

40 **Risa Hoffman (MD)**, Assistant Clinical Professor, David Gaffen school of medicine, UCLA,  
41 RHoffman@mednet.ucla.edu  
42

43  
44 **Rachel Sibande (PhD)**, Program Director, United Nations Foundation  
45 [rsibande@unfoundation.org](mailto:rsibande@unfoundation.org), +27670236497  
46

47 **Godfrey Chapola (PhD)**, Managing Director, RUMARK, P.O Box 31290, Lilongwe.  
48  
49 Cel: 0999792 070, [gchapola@rumark.org](mailto:gchapola@rumark.org)  
50  
51  
52  
53  
54  
55  
56  
57  
58  
59  
60

# Julie Hubbard

94 Culford Road London N1 4HN  
+44 7845 445338  
jhubbard@mednet.ucla.edu

## EDUCATION

London School of Hygiene and Tropical Medicine  
MSc Control of Infectious Diseases

Seattle Pacific University  
Bachelor of Arts: Sociology & Women's Studies  
Cum Laude GPA: 3.74  
Graduated July 2012

## PROFESSIONAL EXPERIENCE

University of California Los Angeles (UCLA), March 2017- Current  
Research Coordinator – 'INTERVAL' Study  
Lilongwe, Malawi and Lusaka, Zambia

- Supervise data collection by study personnel across 15 health facilities in southern and central Malawi. Coordinate field supervision to ensure data quality. Work with Principle Investigator (PI) to develop operating procedures for study implementation. Provide leadership and technical support to Zambia study team.

Harvest India USA, January 2016 – March 2017  
Director of Operations  
Costa Mesa, California and Andhra Pradesh, India

- Managed all aspects of operations to support, fundraise, and raise awareness for education and poverty alleviation initiatives amongst the Dalit, or 'untouchable', caste. Drafted and executed marketing campaigns to meet fundraising goals.

31 Bits International, December 2012 – February 2015  
Director of Operations  
Gulu, Northern Uganda

- Directed 160 beneficiaries and 6 Ugandan counselors in income generating projects. Developed and implemented in-depth monthly reports to evaluate income. Used data to identify hindrances to livelihood, such as domestic violence and HIV health complications. Organized necessary support through internal management or accessing external resources.

One Days Wages, March 2011- December 2012  
Chief Grant Analyst  
Seattle, Washington

- Generated extensive research on project proposals pertaining to the UN Millennium Development Goals and presented analyses for grant decisions.

Seattle Pacific University, September 2011- July 2012  
Research Assistant  
Seattle, Washington

- Edited, reviewed, and prepared research documents for Assistant Director of Women's Studies Program.

## PUBLICATIONS AND PRESENTATIONS

### *Publications*

Julie Hubbard, Gift Kakwesa, Mike Nyirenda, James Mwambene, Ashley Bardon, Kelvin Balakasi, Kathryn Dovel, Thokozani Kalua, Risa M Hoffman; Towards the third 90: improving viral load testing with a simple quality improvement program in health facilities in Malawi, *International Health*, , ihy083, <https://doi.org/10.1093/inthealth/ihy083>

Hubbard J, Moucheraud C, Lungu E, Bardon A, Balakasi K, Kakwesa G, Hoffman R ““I forget that I am a patient”: A qualitative assessment of 6 month dispensing of ART” (Under review)

Dovel K, Beagley M, Hubbard J, Orombi G, Thompson K “Including men without sidelining women: the feasibility of male involvement within a women’s empowerment program in northern Uganda” (Under review)

Dovel K, Hubbard J, Phiri K. “Gender and HIV services: The role of gender norms on ART initiation among men and women in Malawi.” (In preparation)

Peer reviewed poster presentations

“Gender and HIV services: The role of gender norms on ART initiation among men and women in Malawi.” Women in Global Health Scientific Conference. New York, New York. April 2018

“Towards the third 90: improving viral load testing with a simple quality improvement program in health facilities in Malawi” International Aids Society (IAS) Conference, Amsterdam, Netherlands. July 2018

### *Presentations*

“Innovations in differentiated service delivery: Six-month scripting lessons from Ethiopia, Malawi and Zambia” Columbia University Mailman School of Public Health. Webinar, April 2019

### **CERTIFICATIONS**

Confronting Gender Based Violence: Global Lessons with Case Studies from India Certification Course Coursera (Johns Hopkins University) - Online  
October 2015

- Epidemiology of gender-based violence, clinical care issues and how to provide psychosocial support for victims.

### **FELLOWSHIP**

Mennonite Central Committee

Community Development Associate, July-August 2011

- Rural and urban poverty field study in Recife, Brazil association under the direction of the Chair of the Sociology Department at Seattle Pacific University.

### **HONORS**

Seattle Pacific University Deans Scholar, 2008-2012

# BROOKE E. NICHOLS, PHD, MS

## OFFICE

### ADDRESS:

801 Massachusetts Avenue

Crosstown Center, 3<sup>rd</sup> Floor, Room 304

Boston, MA, USA 02118

+1 617 358 2403

Email: [brooken@bu.edu](mailto:brooken@bu.edu)

## ACADEMIC TRAINING:

|      |      |                                                                                                          |
|------|------|----------------------------------------------------------------------------------------------------------|
| 2015 | Ph.D | Department of Viroscience, Erasmus Medical Center (Rotterdam, the Netherlands)                           |
|      |      | <i>Mathematical Modeling and Cost-Effectiveness of Antiretroviral-Based HIV-1 Prevention Strategies.</i> |
| 2011 | M.S. | School of Public Health & Health Science, University of Massachusetts, Amherst                           |
|      |      | (Amherst, MA, USA), Epidemiology                                                                         |
| 2009 | B.A. | Mount Holyoke College (South Hadley, MA, USA), International Relations, <i>cum laude</i>                 |

## RESEARCH APPOINTMENTS:

|                |                     |                                                                                        |
|----------------|---------------------|----------------------------------------------------------------------------------------|
| 2019 – Present | Assistant Professor | Department of Global Health, School of Public Health,<br>Boston University, Boston, MA |
| 2018 – 2019    | Instructor          | Department of Global Health, School of Public Health,<br>Boston University, Boston, MA |
| 2017 – 2018    | Research Scientist  | Department of Global Health, School of Public Health,                                  |



|                |                      |  |                                                                                                                                                 |
|----------------|----------------------|--|-------------------------------------------------------------------------------------------------------------------------------------------------|
|                |                      |  | Boston University, Boston, MA                                                                                                                   |
|                |                      |  | Health Economics & Epidemiology Research Office, Wits                                                                                           |
| 2017 – Present | Principal Researcher |  | Health Consortium, Faculty of Health Sciences, University of Witwatersrand, Johannesburg, South Africa                                          |
| 2017 – Present | Researcher           |  | Joint Faculty Appointment, School of Clinical Medicine, Faculty of Health Sciences, University of the Witwatersrand, Johannesburg, South Africa |
| 2015 – 2016    | Postdoctoral Fellow  |  | Department of Viroscience, Erasmus Medical Center, Rotterdam, the Netherlands                                                                   |
| 2009 – 2010    | Research Assistant   |  | University of Massachusetts Amherst, School of Public Health & Health Sciences, Amherst, MA                                                     |

#### OTHER RESEARCH EXPERIENCE:

|             |                |  |                                                                                                                                          |
|-------------|----------------|--|------------------------------------------------------------------------------------------------------------------------------------------|
| 2012 – 2014 | Epidemiologist |  | Médecins Sans Frontières<br>Amsterdam, the Netherlands.<br>Project: <i>Spinal cord injury outcomes in Sri Lanka</i>                      |
| 2008 – 2009 | Researcher     |  | Ministry of Health and Social Services, Lüderitz, Namibia<br>Project: <i>Ecologic study on alcohol establishments and HIV prevalence</i> |

#### PROFESSIONAL APPOINTMENTS:

|             |                                     |  |                                        |
|-------------|-------------------------------------|--|----------------------------------------|
| 2008 – 2010 | Research Associate:<br>Epidemiology |  | Environ Corporation, Amherst, MA, USA. |
|-------------|-------------------------------------|--|----------------------------------------|

#### AWARDS AND HONOURS:

|      |  |  |                                                                                              |
|------|--|--|----------------------------------------------------------------------------------------------|
| 2019 |  |  | <b>Mary Lyon Award.</b> Mount Holyoke College Alumni Association. Award honors an alumna who |
|------|--|--|----------------------------------------------------------------------------------------------|



has demonstrated sustained achievement in her life and career consistent with the humane values

that Mary Lyon exemplified and inspired in others.

## CONFERENCE ORAL PRESENTATIONS:

\*Denotes graduate student or mentee

1. Popping S\*, Kall M, Stempher E, Versteegh L, **Nichols B**, van Sighem A, van de Vijver D, Boucher C, Verbon A, Delpech V. Country specific factors determine the quality of life among people with HIV in two western European countries.: 4<sup>th</sup> European Workshop on Health Living with HIV, Barcelona, Spain, September 2019.
2. Dovel K, Balakasi K, Shaba F, Offorjebe O, Gupta S, Wong S, Phiri K, Lungu E, Nyirenda M, **Nichols B**, Ngona K, Hoffman R. A randomized trial on index HIV self-testing for partners of ART clients in Malawi. Conference on Retroviruses and Opportunistic Infections (CROI), Seattle, USA, March 2019.
3. **Nichols BE**, Girdwood SJ\*, Crompton T, Stewart-Isherwood L, Berrie L, Chimhamhiwa D, Moyo C, Kuehnle J, Rosen S. Monitoring viral load for the last mile: what will it cost? AIDS, Amsterdam, Netherlands, July 2018.
4. Girdwood SJ\*, **Nichols BE**, Moyo C, Crompton T, Chimhamhiwa D, Rosen S. Optimizing access for the last mile: Geospatial cost model for point of care viral load instrument placement in Zambia. AIDS, Amsterdam, Netherlands, July 2018.
5. Dovel K, Nyirenda M, Shaba F, Offorjebe OA, Balakasi K, **Nichols BE**, Phiri K, Schooley A, Hoffman RM. Facility-based HIV self-testing for outpatients dramatically increases HIV testing in Malawi: a cluster randomized trial. AIDS, Amsterdam, Netherlands, July 2018.
6. **Nichols BE**, Hendrickson C, Sigwebela N, Moyo C, Fox MP, Rosen S. Prioritizing healthcare facilities for on-site mentorship to increase HIV treatment uptake: results from EQUIP. International AIDS Economics Network (IAEN) Conference, Amsterdam, Netherlands, July 2018.
7. van de Vijver DA, Richter A-K, Boucher CA, Gunsenheimer-Bartmeyer B, Kollan C, **Nichols BE**, Spinner C, Wasem J, Schewe K, Neumann A. Cost-effectiveness of pre-exposure prophylaxis in Germany (Kosteneffektivität der HIV-Präexpositionsprophylaxe in Deutschland). DGGÖ (German Society for health economics) Annual Meeting, Hamburg, Germany, March 2018.
8. van de Vijver DA, Richter A-K, Boucher CA, Gunsenheimer-Bartmeyer B, Kollan C, **Nichols BE**, Spinner C, Wasem J, Schewe K, Neumann A. Cost-effectiveness of pre-exposure prophylaxis for HIV-1 prevention in Germany. European AIDS Conference (EACS), Milan, Italy, October 2017.
9. Smit M, van Zoest RA, **Nichols BE**, Vaartjes I, Smit C, van der Valk M, van Sighem A, Wit FW, Hallett TB, Reiss P. Cardiovascular prevention policy in HIV: recommendations from a modeling study. Conference on Retroviruses and Opportunistic Infections (CROI), Seattle, WA. February 2017.
10. Popping S\*, **Nichols BE**, van Kampen JJA, Verbon A, Boucher CAB, van de Vijver DA. Intensive hepatitis C monitoring in previously HCV infected HIV-positive MSM is a cost saving method to

reduce the HCV epidemic. Netherlands Conference on HIV Pathogenesis, Epidemiology, Prevention and Treatment (NCHIV), Amsterdam, the Netherlands, November 2016.

11. **Nichols BE**, Boucher CAB, van der Valk M, Rijnders BJA, van de Vijver DA. PrEP is Only Cost-Effective Among MSM in the Netherlands When Used on Demand. Conference on Retroviruses and Opportunistic Infections (CROI), Boston, MA. February 2016.

12. **Nichols BE**, Boucher CAB, van der Valk M, Rijnders BJA, van de Vijver DA. On demand PrEP among MSM in the Netherlands: a cost-effective approach for preventing HIV-1 infections. Netherlands Conference on HIV

### Peer reviewed publications:

\*Authors contributed equally

\*\*Denotes graduate student or mentee

1. Dovel K, Nyirenda M, Shaba F, Offorjebe OA, Balakaksi K, **Nichols BE**, Cele R, Phiri K, Wong V, Gupta S, Hoffman RM. Effect of facility-based HIV self-testing on uptake of testing among adult outpatients in Malawi: a cluster-randomized trial. *The Lancet Global Health. In press.*
2. van Vliet MM\*\*, Hendrickson C\*\*, **Nichols BE**, Boucher CAB, Peters RPH, Polis CB, van de Vijver DAMC. Epidemiological impact and cost-effectiveness of long-acting pre-exposure prophylaxis combined with injectable contraceptives for HIV prevention in South Africa: a modelling study. *JIAS.* 2019, 22:e25427.
3. Long, L., Kuchukhidze, S., Pascoe, S., **Nichols, B.**, Cele R., Govathson, C., Flynn, D., Rosen, S. Differentiated Models of Service Delivery for Antiretroviral Treatment of HIV in sub-Saharan Africa: A Rapid Review Protocol. *Systematic Reviews.* 2019, 8:314.
4. Masuku S\*\*, Berhanu R, van Rensburg C, Ndjeka N, Rosen S, Long L, Evans D, **Nichols BE**. The costs of managing multi drug-resistant tuberculosis in South Africa: an economic evaluation of moving to a short-course treatment regimen containing bedaquiline. *International Journal of Tuberculosis and Lung Disease. In press.*
5. Hendrickson C\*\*, Long L\*, van de Vijver DA, Boucher CA, O'Bra H, Claassen CW, Njelesani M, Moyo C, Mumba DB, Subedar H, Mulenga L, Rosen S, **Nichols BE**. Novel metric for evaluating PrEP program effectiveness in real-world settings. *Lancet HIV. In press.*
6. Girdwood SJ\*\*, **Nichols BE**, Moyo C, Crompton T, Chimhamhiwa D, Rosen S. Optimizing access for the last mile: Geospatial cost model for point of care viral load instrument placement. *PLoS ONE.* 14(8):e0221586.
7. **Nichols BE**, Girdwood SJ\*\*, Crompton T, Stewart-Isherwood L, Berrie L, Chimhamhiwa D, Moyo C, Kuehnle J, Stevens W, Rosen S. Monitoring viral load for the last mile: what will it cost? *JIAS.* 2019, 22:e25337.
8. Popping S\*\*, **Nichols BE**, van Kampen JJA, Verbon A, Boucher CAB, van de Vijver DA. Targeted HCV core antigen monitoring among HIV-positive men-who-have-sex-with-men is cost-saving. *Journal of Virus Eradication.* 2019; 5:179-190.

- 1
- 2
- 3
- 4 9. **Nichols BE**, Girdwood SJ\*\*, Shibemba A, Sikota S, Gill C, Mwananyanda L, Scott L, Noble L, Carmona S, Rosen S, Stevens W. Cost and impact of dried blood spot versus plasma separation card for viral load testing in resource limited settings. *Clinical Infectious Diseases*. Advance article: 10.1093/cid/ciz338.
- 5
- 6
- 7
- 8
- 9 10. van de Vijver DA, Richter A-K, Boucher CA, Gusenheimer-Bartmeyer B, Kollan C, **Nichols BE**, Spinner CD, Wasem J, Schewe K, Neumann A. Cost-effectiveness and budget impact of generic pre-exposure prophylaxis for HIV-1 prevention in Germany. *Eurosurveillance*. 2019 Feb; 24(7).
- 10
- 11
- 12
- 13 11. Popping S\*\*, Hülligie SJ, Boerekamps A, Rijnders BJA, de Knecht RJ, Rockstroh JK, Verbon A, Boucher CAB, **Nichols BE**, van de Vijver DA. Early treatment of acute HCV infection is cost-effective in HIV-infected men-who-have-sex-with-men. *PLoS One*, 2019. 14(1):e0210179.
- 14
- 15
- 16
- 17 12. **Nichols BE**, Girdwood SJ\*\*, Crompton T, Stewart-Isherwood L, Berrie L, Chimhamhiwa D, Moyo C, Kuehne J, Stevens W, Rosen S. Impact of a borderless sample transport network for scaling up viral load monitoring: results of a geospatial optimization model for Zambia. *JLAS*. 2018, 21:e25206.
- 18
- 19
- 20
- 21 13. Dovel K, Shaba F, Nyirenda M, Ogechukwu AO, Balakasi K, Phiri K, **Nichols BE**, Tseng C-H, Bardon A, Namachapa KN, Hoffman RM. Evaluating the integration of HIV self-testing into low-resource health systems: a study protocol for a cluster randomized control trial from EQUIP Innovations. *Trials*, 2018. 19:498.
- 22
- 23
- 24
- 25 14. Phillips AN, Cambiano V, Nakagawa F, Revill P, Jordan MR, Hallett TB, Doherty M, De Luca A, Lundgren JD, Mhangara M, Apollo T, Mellors J, **Nichols B**, Parikh U, Pillay D, Rinke de Wit T, Sigaloff K, Havlir D, Kuritzkes DR, Pozniak A, van de Vijver D, Vitoria M, Wainberg MA, Raizes E, Bertagnolio S, Working Group on Modelling Potential Responses to High Levels of Pre-ART Drug Resistance in Sub-Saharan Africa. Cost-effectiveness of public-health policy options in the presence of pretreatment NNRTI drug resistance in sub-Saharan: a modelling study. *Lancet HIV*, 2018. 5(3):e146-e154.
- 26
- 27
- 28
- 29
- 30
- 31
- 32
- 33 15. Smit M, van Zoest RA, **Nichols BE**, Vaartjes I, Smit C, van der Valk M, van Sighem A, Wit FW, Hallett TB, Reiss P; Netherlands ATHENA observational HIV cohort. Cardiovascular disease prevention policy in HIV: recommendations from a modelling study. *Clinical Infectious Diseases*, 2018. 66(5):743-750.
- 34
- 35
- 36
- 37
- 38 16. Luiken GPM, Joore IK, Taselaar A, Schuit SCE, Geerlings SE, Govers A, Rood PPM, Prins JM, **Nichols BE**, Verbon A, de Vries-Sluijs TEMS. Non-targeted HIV screening in emergency departments in the Netherlands. *The Netherlands Journal of Medicine*, 2017. 75(9):386-393.
- 39
- 40
- 41
- 42 17. **Nichols BE**, Boucher CAB, van der Valk M, Rijnders BJA, van de Vijver DAMC. Cost-effectiveness analysis of pre-exposure prophylaxis for HIV-1 prevention in the Netherlands: a mathematical modelling study. *Lancet Infectious Diseases*, 2016. 16(12):1423-1429.
- 43
- 44
- 45
- 46 18. **Working Group on Modelling of ART Monitoring Strategies in Sub-Saharan Africa**. Sustainable HIV Treatment in Africa through Viral Load-Informed Differentiated Care. *Nature*, 2015. 528(7580):S68-76.
- 47
- 48
- 49
- 50 19. **Nichols BE**, Gotz HM, van Gorp ECM, Verbon A, Rokx C, Boucher CAB, van de Vijver DAMC. Partner notification for reduction of HIV-1 transmission and related costs among men who have sex with men: a mathematical modeling study. *PLoS One*, 2015. 10(11):e0142576.
- 51
- 52
- 53
- 54
- 55
- 56
- 57
- 58
- 59

- 1  
2  
3  
4  
5  
6  
7  
8  
9  
10  
11  
12  
13  
14  
15  
16  
17  
18  
19  
20  
21  
22  
23  
24  
25  
26  
27  
28  
29  
30  
31  
32  
33  
34  
35  
36  
37  
38  
39  
40  
41  
42  
43  
44  
45  
46  
47  
48  
49  
50  
51  
52  
53  
54  
55  
56  
57  
58  
59  
60
20. **Nichols BE**, Sigaloff KC, Kityo C, Hamers RL, Baltussen R, Bertagnolio S, Jordan MR, Hallett TB, Boucher CA, Rinke de Wit TF, van de Vijver DA. Increasing the use of second-line therapy is a cost-effective approach to prevent the spread of drug-resistant HIV: a mathematical modelling study. *J Int AIDS Soc*, 2014. 17:19164.
  21. **Nichols BE**, Baltussen R, van Dijk JH, Thuma PE, Nouwen JL, Boucher CA, van de Vijver DA. Cost-effectiveness of PrEP in HIV/AIDS control in Zambia: a stochastic league approach. *J AIDS*, 2014. 66(2):221-8.
  22. Eaton JW, Menzies NA, Stover J, Cambiano V, Chindelevitch L, Cori A, Hontelez JAC, Humair S, Kerr CC, Klein DJ, Mishra S, Mitchell KM, **Nichols BE**, Vickerman P, Bakker R, Barnighausen T... Hallett TB. How should HIV programmes respond to evidence for the benefit of earlier treatment initiation? A combined analysis of twelve mathematical models. *Lancet Global Health*, 2014. 2:e23-34.
  23. Armstrong JC\*, **Nichols BE\***, Wilson JM, Cosico RA, Shanks L. Spinal cord injury in the emergency context: review of program outcomes of a spinal cord injury rehabilitation program in Sri Lanka. *Conflict and Health*, 2014. 8(1):4.
  24. **Nichols BE**, Sigaloff KC, Kityo C, Mandaliya K, Hamers RL, Bertagnolio S, Jordan MR, Boucher CA, Rinke de Wit TF, van de Vijver DA. Averted HIV infections due to expanded antiretroviral treatment eligibility offsets risk of transmitted drug resistance: A modeling study. *AIDS*, 2014. 28(1):73-83.
  25. van de Vijver DA, **Nichols BE**, Abbas UL, Boucher CA, Cambiano V, Eaton JW, Glaubius R, Lythgoe K, Mellors J, Phillips A, Sigaloff KC, Hallett TB. Pre-Exposure Prophylaxis will have a limited impact on HIV-1 drug resistance in sub-Saharan Africa: A comparison of mathematical models. *AIDS*, 2013. 27(18):2943-2951.

# Alemayehu Amberbir

POSITION TITLE: Epidemiologist

eRA Commons User Name: A.AMBERBIR\_DI

## EDUCATION/TRAINING

| INSTITUTION AND LOCATION      | DEGREE<br>(if applicable) | YEAR(s) | FIELD OF STUDY |
|-------------------------------|---------------------------|---------|----------------|
| Haramaya University, Ethiopia | BSc                       | 2004    | Health Officer |
| Jimma University, Ethiopia    | MPH                       | 2007    | Public Health  |
| University of Nottingham, UK  | PhD                       | 2012    | Epidemiology   |

## Positions and Honors

Sept 2003 – Jun 2004 Intern (Clinical/Public Health), Haramaya University & Hiwot Fana Hospital, Ethiopia  
 Oct 2004 – Sept 2005 HIV/AIDS Prevention and Care Program Officer, Menschen Für Menschen, Ethiopia

Aug 2007 - Mar 2008 Lecturer, Department of Epidemiology and Biostatistics, Jimma University, Ethiopia

Feb 2008 – Mar 2011 Honorary Lecturer, Addis Ababa University, Ethiopia

Feb 2008 – Feb 2012 Research Fellow, University of Nottingham, UK

Mar 2012 – Sep 2013 Research Fellow, London School of Hygiene and Tropical Medicine, UK

Oct 2013 – Jan 2016 Lecturer, London School of Hygiene and Tropical Medicine, UK

Jan 2016 – Jun 2019 Epidemiologist, Dignitas International

Jan 2018 – Jun 2019 Adjunct Lecturer, Dalla Lana School of Public Health, University of Toronto

Jan 2018 – Dec 2019 Postdoctoral Fellow; CIHR Canadian HIV Trials Network (CTN), Canada

Aug 2019 – present Science Director, University of California Los Angeles; David Geffen School of Medicine

## Contribution to Science

*Investigating non-communicable diseases (hypertension, diabetes and asthma) in Africa (selected)*

1. Soares ALG, Banda L, **Amberbir A**, Jaffar S, Musicha C, Price A, Nyirenda MJ, Lawlor DA, Crampin A. Sex and area differences in the association between adiposity and lipid profile in Malawi. *BMJ Glob Health*. 2019 Sep 11;4(5):e001542. doi: 10.1136/bmjgh-2019-001542.

2. **Amberbir A**. The challenge of worldwide tuberculosis control: and then came diabetes. *Lancet GlobHealth*. 2019 Apr;7(4):e390-e391. doi: 10.1016/S2214-109X(19)30053-1.

3. **Amberbir A**, S Lin, J Berman, et al A Muula, D Jacoby, E Wroe et al. Systematic review of hypertension and diabetes burden and risk factors and interventions for prevention and control in



1  
2  
3 Malawi: The NCD BRITE Consortium. *Glob Heart*. 2019 Jun;14(2):149-154. doi:  
4 10.1016/j.gheart.2019.05.004. Review.  
5

6 4. **Amberbir A**, Banda V, Singano V, Matengeni A, Pfaff C, Ismail Z, Allain TJ, Chan AK,  
7 Sodhi SK, van Oosterhout JJ. Effect of cardio-metabolic risk factors on all-cause mortality  
8 among HIV patients on antiretroviral therapy in Malawi: A prospective cohort study. *PLoS ONE*.  
9 2019 Jan 17;14(1):e0210629. doi: 10.1371/journal.pone.0210629. PMID: 30653539  
10

11 5. **Amberbir A**, Singano V, Matengeni A, Ismail Z, Kawalazira G, Chan AK, et al.  
12 Dyslipidemia among rural and urban HIV patients in south-east Malawi. *PLoS ONE* 2018;  
13 13(5): e0197728. <https://doi.org/10.1371/journal.pone.0197728>  
14

15 6. Price AJ, Crampin AC, **Amberbir A**, et al. Prevalence of obesity, hypertension and diabetes, and  
16 cascade of care in sub-Saharan Africa: a cross-sectional population-based study in rural and urban  
17 Malawi. *Lancet Diabetes Endocrinol* 2018; published online Jan 19.  
18 [http://dx.doi.org/10.1016/S2213-8587\(17\)30432-1](http://dx.doi.org/10.1016/S2213-8587(17)30432-1).  
19

20 7. \*The GBD 2015 Obesity Collaborators et al [**inc Amberbir A**]. Health Effects of Overweight  
21 and Obesity in 195 Countries over 25 Years. *N Engl J Med* 2017;377(1):13-27.  
22

23 8. Divala OH, **Amberbir A**, Ismail Z, Beyene T, Garone D, Pfaff C, Singano V, Akello H,  
24 Joshua M, Nyirenda MJ, Matengeni A, Berman J, Mallewa J, Chinomba GS, Kayange N, Allain  
25 TJ, Chan AK, Sodhi SK, van Oosterhout JJ. The burden of hypertension, diabetes mellitus, and  
26 cardiovascular risk factors among adult Malawians in HIV care: consequences. *BMC Public*  
27 *Health*. 2016 Dec 12;16(1):1243. PMID:27955664  
28

29 9. Crampin AC, Kayuni N, **Amberbir A**, Musicha C, Koole O, Tafatatha T, Branson K, Saul J,  
30 Mwaiyeghele E, Nkhwazi L, Phiri A, Price AJ, Mwagomba B, Mwansambo C, Jaffar S, Nyirenda  
31 MJ. Hypertension and Diabetes in Africa: Design and implementation of a large population-  
32 based study of burden and risk factors in rural and urban Malawi. *Emerging Themes in*  
33 *Epidemiology*. 2016, 13:3. DOI: 10.1186/s12982-015-0039-2  
34

35 10. Jaffar S, **Amberbir A**, Kayuni N, Musicha C, Nyirenda M. Viewpoint: scaling up testing  
36 services for noncommunicable diseases in Africa: priorities for implementation research. *Trop*  
37 *Med Int Health*. 2013Nov;18(11):1353-6. doi: 10.1111/tmi.12180. Epub 2013 Sep  
38

39 11. **Amberbir A**, Medhin G, Hanlon C, Britton J, Davey G, Venn A. Effects of early life  
40 paracetamol use on the incidence of allergic disease and sensitization: 5 year follow-up of an  
41 Ethiopian birth cohort. *PLoS ONE*. 2014 Apr 9;9(4):e93869. doi:  
42 10.1371/journal.pone.0093869.  
43

44 12. **Amberbir A**, Medhin G, Abegaz WE, Hanlon C, Robinson K, Fogarty A, Britton J, Venn  
45 A, Davey G. Exposure to *Helicobacter pylori* infection in early childhood and the risk of  
46 allergic disease and atopic sensitization: a longitudinal birth cohort study. *Clin Exp Allergy*.  
47 2014 Apr;44(4):563-71. doi:  
48

49 13. **Amberbir A**, Medhin G, Erku W, Alem A, Simms R, Robinson K, Fogarty A, Britton J, Venn  
50 A, Davey G. Effects of *Helicobacter pylori*, geohelminth infection and selected commensal  
51 bacteria on the risk of allergic disease and sensitization in 3-year-old Ethiopian children. *Clin*  
52 *Exp Allergy*. 2011 Oct;41(10):1422-30. doi: 10.1111/j.1365-2222.2011.03831.x. Epub 2011 Aug  
53 10.  
54  
55  
56  
57  
58  
59  
60

1  
2  
3  
4 14. **Amberbir A**, Medhin G, Alem A, Britton J, Davey G, Venn A. The role of acetaminophen  
5 and geohelminth infection on the incidence of wheeze and eczema: a longitudinal birth-cohort  
6 study. *Am J Respir Crit Care Med*. 2011 Jan 15;183(2):165-70. doi: 10.1164/rccm.201006-  
7 0989OC. Epub 2010 Oct 8.  
8  
9

10  
11 *HIV risk behaviours and status disclosure in African settings (selected)*

12 1) Dessalegn NG, Hailemichael RG, Shewa-Amare A, Sawleshwarkar S, Lodebo B, **Amberbir**  
13 **A**, Hillman RJ. HIV Disclosure: HIV-positive status disclosure to sexual partners among  
14 individuals receiving HIV care in Addis Ababa, Ethiopia. *PLoS One*. 2019 Feb  
15 15;14(2):e0211967. doi: 10.1371/journal.pone.0211967. eCollection 2019.  
16

17  
18 2) Deribe K, Woldemichael K, Wondafrash M, Haile A, **Amberbir A**. Disclosure experience  
19 and associated factors among HIV positive men and women clinical service users in  
20 Southwest Ethiopia. *BMC Public Health*. 2008 Feb 29;8:81. doi: 10.1186/1471-2458-8-81.  
21

22  
23 3) Biadgilign S, Deribew A, **Amberbir A**, Escudero HR, Deribe K. Factors associated  
24 with HIV/AIDS diagnostic disclosure to HIV infected children receiving HAART: a multi-  
25 center study in Addis Ababa, Ethiopia. *PLoS ONE*. 2011 Mar 21;6(3):e17572. doi:  
26 10.1371/journal.pone.0017572.  
27

28  
29 *Health system research in to infectious diseases – HIV – in Africa (selected)*

30 1. Alhaj M<sup>1,2¶</sup>, **Amberbir A**<sup>1¶</sup>, Singogo E, Banda V, van Lettow M, Matengeni A, Kawalazira  
31 G, Theu J, Jagriti MR, Chan AK, van Oosterhout JJ. Retention on antiretroviral therapy  
32 during universal test and treat implementation in Zomba district, Malawi: a retrospective  
33 cohort study. *J Int AIDS Soc*. 2019 Feb;22(2):e25239. doi: 10.1002/jia2.25239.  
34  
35

36 2. Singano V<sup>¶</sup>, **Amberbir A**<sup>¶</sup>, Garone D, Kandionamaso C, Msonko J; van Lettow M,  
37 Kalima K, Mataka, Kawalazira G, Mateyu G, Kwekwesa A, Matengeni A; van  
38 Oosterhout JJ. The burden of gynecomastia among men on Antiretroviral Therapy in  
39 Zomba, Malawi. *PLoS ONE* 12(11): e0188379: doi.org/10.1371/journal.pone.0188379  
40

41  
42 3. Mpawa H, Kwekwesa A, **Amberbir A**, Garone D, Divala OH, Kawalazira G, van Schoor V ,  
43 Ndindi H, van Oosterhout JJ. Virological outcomes of Antiretroviral Therapy in Zomba Central  
44 Prison, Malawi: *J Int AIDS Soc* 2017, 20:21623  
45

46 4. **Amberbir A**, Woldemichael K, Getachew S, Girma B, Deribe K. Predictors of adherence to  
47 antiretroviral therapy among HIV-infected persons: a prospective study in Southwest  
48 Ethiopia. *BMC Public Health*. 2008 Jul 30;8:265. doi: 10.1186/1471-2458-8-265.  
49

50  
51 5. Biadgilign S, Deribew A, **Amberbir A**, Deribe K. Barriers and facilitators to  
52 antiretroviral medication adherence among HIV-infected paediatric patients in  
53 Ethiopia: A qualitative study. *SAHARA J*. 2009 Dec;6(4):148-54.  
54  
55  
56  
57  
58  
59  
60

- 1  
2  
3 6. Deribe K, Hailekiros F, Biadgilign S, **Amberbir A**, Beyene BK. Defaulters from  
4 antiretroviral treatment in Jimma University Specialized Hospital, Southwest Ethiopia. *Trop*  
5 *Med Int Health*. 2008 Mar;13(3):328-33. doi: 10.1111/j.1365-3156.2008.02006.x. Epub  
6 2008 Feb 21.  
7  
8  
9  
10  
11  
12  
13  
14  
15  
16  
17  
18  
19  
20  
21  
22  
23  
24  
25  
26  
27  
28  
29  
30  
31  
32  
33  
34  
35  
36  
37  
38  
39  
40  
41  
42  
43  
44  
45  
46  
47  
48  
49  
50  
51  
52  
53  
54  
55  
56  
57  
58  
59  
60



# LAWRENCE C. LONG, PHD, MCOM

**OFFICE ADDRESS:** 801 Massachusetts Avenue,  
Crosstown Center, 3<sup>rd</sup> Floor, Room 369  
Boston, MA, 02119, USA.  
+1 (617) 358-3122  
Email: [lclong@bu.edu](mailto:lclong@bu.edu)

## ACADEMIC TRAINING:

|      |            |                                                                                                                                 |
|------|------------|---------------------------------------------------------------------------------------------------------------------------------|
| 2016 | Ph.D.      | School of Public Health, University of Witwatersrand (Johannesburg, South Africa)                                               |
| 2009 | M.Com.     | School of Economic and Business Sciences, University of Witwatersrand (Johannesburg, South Africa), Economics, <i>cum laude</i> |
| 2001 | B.Bus.Sci. | School of Economics, University of Cape Town (Cape Town, South Africa), Economics and Finance                                   |

## ACADEMIC LEADERSHIP:

|             |                      |                                                                                                                                      |
|-------------|----------------------|--------------------------------------------------------------------------------------------------------------------------------------|
| 2011 - 2017 | Deputy Division Head | Health Economics & Epidemiology Research Office<br>Wits Health Consortium<br>Faculty of Health Sciences, University of Witwatersrand |
| 2008 – 2011 | Research Coordinator | Health Economics & Epidemiology Research Office<br>Wits Health Consortium<br>Faculty of Health Sciences, University of Witwatersrand |

## RESEARCH APPOINTMENTS:

|        |                                 |                                                                                                                        |
|--------|---------------------------------|------------------------------------------------------------------------------------------------------------------------|
| –      | Research Assistant              | Department of Global Health, School of Public Health, Boston University                                                |
| 2017 t | Professor                       |                                                                                                                        |
| –      | Associate Researcher            | Joint Faculty Appointment, School of Clinical Medicine, Faculty of Health Sciences, University of the Witwatersrand    |
| 2008 t |                                 |                                                                                                                        |
| –      | Principal Researcher (Visiting) | Health Economics & Epidemiology Research Office<br>Wits Health Consortium<br>Faculty of Health Sciences, University of |
| 2008 t |                                 |                                                                                                                        |

|  |             |                    |                                           |
|--|-------------|--------------------|-------------------------------------------|
|  |             |                    | Witwatersrand                             |
|  |             |                    | Health Economics & Epidemiology           |
|  |             |                    | Research Office                           |
|  | 2006 – 2007 | Research Associate | Wits Health Consortium                    |
|  |             |                    | Faculty of Health Sciences, University of |
|  |             |                    | Witwatersrand                             |
|  |             |                    | Health Economics & Epidemiology           |
|  | 2005        | Study Coordinator  | Research Office                           |
|  |             |                    | Wits Health Consortium                    |
|  |             |                    | Faculty of Health Sciences, University of |
|  |             |                    | Witwatersrand                             |

#### OTHER RESEARCH EXPERIENCE:

|  |             |            |                                                                                                                                                                                                           |
|--|-------------|------------|-----------------------------------------------------------------------------------------------------------------------------------------------------------------------------------------------------------|
|  | 2007 – 2008 | Consultant | Center for International Health and Development,<br>Boston University School of Public Health<br>Project: <i>Cost and Outcomes of Models for Delivering Antiretroviral Therapy for HIV/AIDS in Zambia</i> |
|  | 2007 – 2008 | Consultant | Center for International Health and Development,<br>Boston University School of Public Health<br>Project: <i>Cost and Outcomes of Models for Delivering Antiretroviral Therapy for HIV/AIDS in Kenya</i>  |

#### TEACHING EXPERIENCE:

|  |      |                                                                                                                                                                                                                                                                                           |
|--|------|-------------------------------------------------------------------------------------------------------------------------------------------------------------------------------------------------------------------------------------------------------------------------------------------|
|  | 2019 | <b>Structural factors affecting HIV – an economists perspective.</b><br>Audience: MPH Students. Guest<br>Lecture in Individual, Community, and Population Health SPH GH 720<br>Boston University, Boston,<br>USA. Presented in two classes (Profs Monica Onyango & Jennifer Schlezinger). |
|  | 2019 | <b>Economic evaluation.</b> Audience: MPH Students. Guest Lecture in<br>Monitoring and Evaluation of<br>Global Health Programs SPH GH 745, Boston University, Boston, USA.                                                                                                                |
|  | 2019 | <b>Using economics to influence policy.</b> Audience: MPH Students. Guest<br>Lecture in Essential of<br>Economics and Finance for Global Health SPH GH 762, Boston<br>University, Boston, USA.                                                                                            |
|  | 2017 | <b>From cost to clinic – Economics changing health policy.</b> Audience:<br>MPH Students. Guest<br>Lecture in Essentials of Economics and Finance for Global Health SPH<br>GH 762, Boston University,<br>Boston, USA.                                                                     |
|  | 2016 | <b>Data collection and analysis for economic evaluations.</b> Audience:<br>Technical implementing<br>partners. EQUIP Partners Meeting,<br>Johannesburg, South Africa.                                                                                                                     |

- 1  
2  
3  
4 2016 **From patient to policy – Ensuring that your clinical practice is positioned to inform evidenced based policy.** Audience: HIV Clinicians. Chair of Research Skills Building Session, Southern African HIV Clinicians Society Conference, Johannesburg, South Africa.
- 5  
6  
7  
8  
9  
10 2014 **Introduction to Health Programme Evaluation.** Audience: MSc students – Module of Epidemiology for Health Researchers II. University of Witwatersrand, Johannesburg.

11  
12  
13  
14  
15  
16  
17 **INVITED PRESENTATION:**

- 18  
19 2019 **Costs and resources needed to provide HIV services to key populations over the next 10 years.** Idea creation meeting – Defining and addressing HIV treatment and prevention needs of underserved and high-risk populations. BMGF & Journal of International AIDS Society, New York, USA.
- 20  
21  
22  
23  
24  
25 2019 **Direct action to achieve a result.** Spotlight on “Think, Teach, Do”, School of Public Health, Boston University, Boston, USA.
- 26  
27  
28 2019 **Learning Community – Take home.** Academy for Faculty Advancement, School of Medicine, Boston University, Boston, USA.
- 29  
30  
31 2018 **Urban public health issues – the transition to Boston.** Health Economics and Epidemiology Research Office, Johannesburg, South Africa.
- 32  
33  
34 2017 **Partner’s Area of Expertise – Health Economics.** USAID South Africa, Partners Meeting, Pretoria, South Africa. Presented in absentia by Denise Evans.
- 35  
36  
37 2017 **Innovations Research on AIDS (INROADS).** Director Doug Arbuckle, Office HIV AIDS (OHA, USA). USAID, Johannesburg, South Africa. Presented in absentia by Denise Evans.
- 38  
39  
40  
41 2016 **Test and Start – Research supporting evidence based policy change.** Zambian Department of Health & USAID, EQUIP Project, Johannesburg, South Africa.
- 42  
43  
44  
45 2016 **Initiating ART at a patients first clinic visit: the RapIT randomised trial.** Faculty of Health Sciences Research Day, University of Witwatersrand, Johannesburg, South Africa.

46  
47  
48  
49 **CONFERENCE ORAL PRESENTATIONS:**

- 50  
51  
52 1. Van Rensburg C, Berhanu R, Hirasen K, Evans D, Rosen S, **Long L.** Cost outcome analysis of decentralised care for drug-resistant tuberculosis in Johannesburg, South Africa. 49<sup>th</sup> Union World Conference on Lung Health, 24-27 October, The Hague, The Netherlands. 2018.
- 53  
54  
55  
56  
57  
58  
59  
60

2. Evans D, Musakwa N, Nattey C, Bor J, Lonnermark E, Larshans C, Andreasson S, Nyasulu P, **Long L**. Barriers to accessing care for HIV and Tuberculosis among adolescents and young adults aged 18 – 25 years in Johannesburg, South Africa. 5<sup>th</sup> SA TB Conference, 12-15 June, Durban, South Africa. 2018.
3. Lince-Deroche N, Leuner R, **Long L**. When Donor Funding Leaves: The immediate impact on resources of withdrawal of support for direct HIV care and treatment at public health facilities in Johannesburg. 9<sup>th</sup> International AIDS Society (IAS) Conference, 23-26 July, Paris, France. 2017.
4. Musakwa N, Evans D, Feeley A, Magwete M, Patz S, McNamara L, **Long L**, Sanne I. Acute malnutrition and dietary intake among paediatric HIV-positive patients initiating antiretroviral therapy in Johannesburg, South Africa. 8<sup>th</sup> SA AIDS Conference, 13-15 June, Durban, South Africa. 2017.
5. Rosen S, Maskew M, Fox MP, Nyoni C, Mongwenyana C, Maletse G, Sanne I, Bokaba D, Sauls C, Rohr J, **Long L**. Initiating ART at a Patient's First Clinic Visit: The RapIT Randomized Trial. Conference on Retroviruses and Opportunistic Infections (CROI) 2016, 22-25 February, Boston, USA.
6. Hirasen K, Berhanu R, Schnippel K, **Long L**, Rosen S, Sanne I. Twelve-month outcomes of patients initiating drug-resistant tuberculosis treatment at a decentralized outpatient clinic in Johannesburg, South Africa. 46<sup>th</sup> World Conference on Lung Health of the International Union Against Tuberculosis and Lung Disease (The Union), Cape Town, South Africa, 2-6 December 2015.
7. Evans D, Schnippel K, Budgell E, Shearer K, Berhanu R, **Long L**, Rosen S. Predictors of mortality in patients diagnosed with preXDR- and XDR-TB: results from the South African National TB Programme, 2009-2010. 46<sup>th</sup> World Conference on Lung Health of the International Union Against Tuberculosis and Lung Disease (The Union), Cape Town, South Africa, 2-6 December 2015.

#### BIBLIOGRAPHY:

ORCID ID: [0000-0003-4986-4988](https://orcid.org/0000-0003-4986-4988)  
<https://scholar.google.co.za/citations?user=fao8zDgAAAAJ&hl=en>  
 Google Scholar: <https://scholar.google.co.za/citations?user=fao8zDgAAAAJ&hl=en>

#### Peer reviewed publications:

1. **Long L**, Kuchukhidze S, Pascoe S, Nichols B, Cele R, Govathson C, Huber A, Flynn D, Rosen S. Differentiated models of service delivery for antiretroviral treatment of HIV in sub-Saharan Africa: a rapid review protocol. *Systematic Reviews*. DOI: 10.1186/s13643-019-1210-6. 2019.

- 1
- 2
- 3
- 4 2. Jamieson L, Evans D, Berhanu R, Ismail N, Aucock S, Wallengren K, **Long L**. Data quality of drug-resistant tuberculosis and antiretroviral therapy electronic registers in South Africa. *BMC Public Health*. DOI: 10.1186/s12889-019-7965-9. 2019.
- 5
- 6
- 7
- 8 3. Mokhele I, Mashamaite S, Majuba P, Xulu T, **Long L**, Onoya D. Effective public-private partnerships for sustainable antiretroviral therapy: outcomes of the Right to Care health services GP down-referral program. *BMC Public Health*. DOI: 10.1186/s12889-019-7660-x. 2019.
- 9
- 10
- 11
- 12
- 13 4. Lince-Deroche N, Leuner R, Meyer-Rath G, Pillay Y, **Long L**. When Donor Funding Leaves: A retrospective review of the impact of integrating direct HIV care and treatment into public health services in a region of Johannesburg. *Cost Effectiveness and Resource Allocation*. DOI: 10.1186/s12962-019-0192-5. 2019.
- 14
- 15
- 16
- 17 5. Musakwa N, Feeley A, Magwete M, Patz S, McNamara L, Sanne I, **Long L**, Evans D. Dietary intake among paediatric HIV-positive patients initiating antiretroviral therapy in Johannesburg, South Africa. *Vulnerable Children and Youth Studies (RVCH)*. DOI: 10.1080/17450128.2019.166858. 2019.
- 18
- 19
- 20
- 21 6. Brennan A, Bonawitz R, Gill CJ, Thea DM, Kleinman M, **Long L**, McCallum C, Fox MP. A Meta-analysis Assessing Diarrhea and Pneumonia in HIV-Exposed Uninfected Compared With HIV-Unexposed Uninfected Infants and Children. *Journal of Acquired Immune Deficiency Syndrome (JAIDS)*. DOI: 10.1097/QAI.0000000000002097. 2019
- 22
- 23
- 24
- 25
- 26
- 27 7. Berry KM, Rodriguez CA, Berhanu R, Ismail N, Rosen S, **Long L**, Evans D. Treatment outcomes among pediatrics, adolescents, and adults on treatment for drug-sensitive TB in two metropolitan municipalities in Gauteng Province, South Africa. *BMC Public Health*. DOI: 10.1186/s12889-019-7257-4. 2019.
- 28
- 29
- 30
- 31
- 32
- 33
- 34
- 35
- 36
- 37
- 38
- 39
- 40
- 41
- 42
- 43
- 44
- 45
- 46
- 47
- 48
- 49
- 50
- 51
- 52
- 53
- 54
- 55
- 56
- 57
- 58
- 59
- 60

## IN-DEPTH INTERVIEW FOR MEN – MIDLINE

### Section 1: Pre-Trial Experiences

1. At some point in the past, you stopped taking ARV's (or didn't start ART), which is why you were recruited into this study. Can you walk me through some of the reasons that it was difficult to stay on (or start) ART in the past?

### Section 2: Trial Experience

1. As a part of your participation in this study, you may have been visited a couple of times by different people. Did anything **bad** happen as a result of these visits?
2. Did someone discover your HIV status as a result of the study or as a result of taking ART since you enrolled?
3. How many times have you met with a health care worker (Patient Supporter/Nurse) about HIV (excluding ART clinic visits)?
  1. *If yes: Where did you meet this person?*
4. When this health care workers (Patient Supporter/Nurse) met with you, you may have gone through this Men's Counseling Flip Chart [SHOW THE FLIP CHART].
  1. Have you ever seen this flip chart?
    - i. IF YES: How was the counseling from this flip chart different from the counseling you have received in the past (before joining the study)?
    - ii. IF YES: What topic/idea from the flip chart was the most helpful to you?
    - iii. IF YES: You described to me earlier that you have missed ART in the past because of [X] reason. Did the new counseling with this flip chart help you deal with [X]? How?
    - iv. IF NO: When you met with the health care worker, can you briefly describe what you discussed?
5. As a part of the study, you may have been offered to be given ART in the home/community.
  1. Did you decide to get ART at home/in the community? *If NO: Skip to Question 6.*
  2. Why did you make the choice you made?
  3. Usually health care workers don't give people a choice of what service you get. But for you, you were given the option between home or facility. How did having this choice (having a say) make you feel?
6. How do you currently get ARTs?
  1. IF at HOME/COMMUNITY: How many times have you gotten your medication at home?
  2. If at the FACILITY: When you went back to the facility, did the did a health care worker/patient supporter offer you any other services?
    - i. What did they do?
    - ii. Was this helpful for you? Why/why not?
7. Has either HCW been supporting you or chatting with you about anything else in addition to HIV or ART?
  1. Do you ever contact either HCW directly to chat or ask questions?
    - i. IF YES: How often do you talk with them? What do you talk about?
  2. Is your relationship with either HCW different to the ones you have had with other HCWs before joining the study? How?
    - i. IF YES: Do you think this relationship helps you more than your relationship with other HCWs? IF YES: How?
8. Now think about overall your interactions with the health care workers you interacted with since you started the study – the Patient Supporter and the Nurse who brought you ART. What did you like about your interactions with them? How do you think it helps you with ART?



- 1  
2  
3  
4  
5  
6  
7  
8  
9
9. With everything in life, there are some things we like and some things that could be a little better. What did you NOT like about your interactions with the Patient Supporter and the Nurse who brought you ART?
  10. Is there anything else you think you need a health care worker or the health facility could do differently in order for you to be comfortable taking ART regularly? Is there anything else you need?

### Section 3: Initiation

Now I'd like to ask you about what has happened with your ARVs since you were enrolled in the study.

11. Did you start taking ART (again) since enrolling in the study?

*If YES:*

- a. Why did you (re) initiate ART? What convinced you it was good to take medication (again)?
- b. Who was most influential in your decision to start ART (again)?

*If NO:*

- c. Why have you not initiated ART since enrolling in the study?
- d. Has anyone influenced you to not start ART? Who? Why?
- e. Is there anything that could motivate/help you to initiate ART?

12. We know that starting ART can be difficult. What do you think is the most difficult thing about re-starting ART for you
13. Was there anything that made it easy for you to (re)start ART? (opposite of probes below)
1. For those who opted for HOME-BASED: Do you think getting ART at home helped you re-engage in care? Why/why not?
14. For the next set of questions please feel free to be honest. There is no right or wrong answer.
1. Do you feel MORE confident you can stay on ARTs in the future? Why/why not?
  2. Is there someone in your life now that encourages you?
  3. Do you have a better relationship with HCWs / or trust them more? Why/why not?
  4. Do you have a plan so that you don't run out of ARVs if you're away or busy?
  5. Do you think ARVs help you reach your goals for making money and for your family? Why/why not?

## IN-DEPTH INTERVIEW FOR MEN – ENDLINE

### Section 1: Pre-Trial Experiences

1. Think about when you stopped taking ART **before** joining the study. Can you remember why you stopped swallowing ART pills?
2. Talk to me about some things that made it difficult for YOU to stay on (or start) ART BEFORE joining the study?

### Section 2: Post-Trial Experiences

3. As a part of the study, you received [ONLY MENTION THE SERVICE THAT ALIGNS WITH THE CLIENTS STUDY ARM: counseling, mentorship, counseling + home-based 1 month, counseling + home-based 3 months].
  - a. How did you feel about this service?
  - b. Was this helpful to you? How?
4. Since you enrolled in the study did you restart ARVs?
  - a. IF NEVER RE-INITIATED ART IN THE STUDY: Why have you not re-started ART since joining the study?

5. Think about the challenges you experienced BEFORE joining the study. [REFER BACK TO THE CHALLENGES MENTIONED IN QUESTION 1 and 2]. Have these challenges gone away or been reduced since you joined the study?
  - a. How?
  - b. Why has it changed/not changed?
6. Have you had any **new or different** challenges since joining the study (either to attend refill appointments or taking your ART)? What are they?
  - a. Why do you think you experience them now?
7. Are there things about attending refill appointments or swallowing ART that are now easier since you joined the study?
  - a. What are they? Why?
8. Think about what you discussed with the study HCW who met with you [he may or may not have used this flip chart]. When he chatted with you, he might have told you some things that were **new** to you about how to keep taking ARTs. Have you tried doing any of those things AFTER you met with the HCW?
  - a. What was it?
  - b. Did it help you? How?
  - c. If it did not help you, what challenges did you face?
9. Have you continued to talk to the study HCW since you first met with him?
  - a. Describe your relationship.
    - i. How frequently do you connect? In person, on the phone, both?
    - ii. What do you discuss?
    - iii. How is this relationship helpful for you and your life?
    - iv. Do you wish for your relationship with the HCW to continue [or continued in the case of the HCW being fired]? Why? Why not?
10. [GENERAL NOT JUST STUDY HCWS] What additional services/interventions [not materials/monetary] do you wish you could have to help you consistently access or swallow ART?
  - a. Would you need this for a short period of time (one time, or for a month) or would you need it ALL the time (for years)? Why?
11. Do you have other health concerns outside of HIV? What are they?
  - a. Is it easier or harder for you to get care for these concerns as compared to getting ART services? Why?

### Section 3: Repeat Treatment Interruption [ONLY FOR THOSE WHO REINTIATED]

Now I want to talk to you about your use of ART services since joining the study.

12. Have you missed an ART appointment or missed swallowing your medication on any day since you restarted ART?
 

If **NO**:
13. How have you managed to stay on ART? What strategies do you think are most useful to help you stay on ART? Are they different from the one's you mentioned before? Does someone or something specifically help you?
 

If **YES**:
14. Can you tell me what happened?
  - a. For how long did you stop taking ART?
  - b. How many times has it happened?
  - c. Why did you miss ART appointment/swallowing ART?
15. What do you think would make it easier for men like you to not miss doses of ART or ART appointments?
16. Have you started taking ARVS **again** after you missed doses or gone back to the facility after you missed a refill appointment?
 

If **NO** – skip to question 18

If **YES**
17. Did anything made it easy for you to (re)start ART AGAIN?



- 1  
2  
3  
4  
5  
6  
7
18. We know that restarting ART can be difficult. What fears/worries/concerns did you have to overcome in order to restart (again)?
19. What would make it easier for men like you to come back to the clinic after missing an appointment?

8  
9

#### Section 4: Client centered care choice experiment

- 10  
11  
12  
13  
14  
15  
16  
17  
18  
19  
20  
21  
22  
23  
24  
25  
26  
27  
28  
29  
30  
31  
32  
33  
34  
35
20. We know there is no such thing as a 'perfect' healthcare worker. We are all human. But today we want to give you the opportunity to think about key things you want if you had the perfect interaction with a health care worker. Here is a picture of a health care worker. Around him we have characteristics on different cards [McDaphton to read through the cards]
1. He treats me with respect
  2. His counseling message is easy to understand
  3. His counseling addresses my specific concerns
  4. He maintains privacy/keeps my secrets
  5. He keeps in contact with me (not just a one time counseling)
  6. He comes to the community to find me
  7. He treats me like family and cares for me as a person
  8. He asks me questions about my life/circumstances
  9. He takes his time with me (the counseling session is not rushed)
  10. He shares his own experiences openly as a fellow man
  11. He provides fast services
21. I'd like you to choose the 6 most important characteristics you think are essential for how you want to interact with health care workers. There is no right or wrong answers. This is about what matters to you.
- a. Why have you chosen these? What makes them very important to you?
22. Now you can only choose 3 of these characteristics. Look at your 6 characteristics in front of you. What THREE are the most important/essential characteristics for your health care worker to still provide you with the services you would like.
- a. Why have you chosen these? Why did you NOT choose the other three?

36  
37  
38  
39  
40  
41  
42  
43  
44  
45  
46  
47  
48  
49  
50  
51  
52  
53  
54  
55  
56  
57  
58  
59  
60

#### Section 5: Income

23. What things do you do to earn a living? Think about all the work you do – this may include several different things.
- a. How do you earn money (what kind of work do you do)?
  - b. Where do you work?
  - c. Do you travel for work?
  - d. How often do you work?
  - e. How do you usually find this work? How do employers/bosses or customers find you or how do you find markets for your products?
24. What would happen to you and/or your family if you spent a whole day at the clinic and did not earn any money that day?
- a. Is it possible for you to attend your ART appoint and not miss out on any income/money? How is this possible for you?
  - b. In the WORST case scenario: how much missed opportunities to earn money would you experience? What would be the biggest impact on your financial situation be if you attend a clinic appointment and miss work/work opportunities (exp: do you miss a client, did your shop not open, did you miss the chance to get a long term job?)
  - c. Does missing a day from making money impact your family? How?

# BMJ Open

## Identifying efficient linkage strategies for HIV self-testing (IDEaL): a study protocol for an individually randomized control trial

|                                 |                                                                                                                                                                                                                                                                                                                                                                                                                                                                                                                                                                                                                                                                                                                                                                                                                                                                                                                                                                                                                                                                                                                                                                                                                                                                                     |
|---------------------------------|-------------------------------------------------------------------------------------------------------------------------------------------------------------------------------------------------------------------------------------------------------------------------------------------------------------------------------------------------------------------------------------------------------------------------------------------------------------------------------------------------------------------------------------------------------------------------------------------------------------------------------------------------------------------------------------------------------------------------------------------------------------------------------------------------------------------------------------------------------------------------------------------------------------------------------------------------------------------------------------------------------------------------------------------------------------------------------------------------------------------------------------------------------------------------------------------------------------------------------------------------------------------------------------|
| Journal:                        | <i>BMJ Open</i>                                                                                                                                                                                                                                                                                                                                                                                                                                                                                                                                                                                                                                                                                                                                                                                                                                                                                                                                                                                                                                                                                                                                                                                                                                                                     |
| Manuscript ID                   | bmjopen-2022-070896.R2                                                                                                                                                                                                                                                                                                                                                                                                                                                                                                                                                                                                                                                                                                                                                                                                                                                                                                                                                                                                                                                                                                                                                                                                                                                              |
| Article Type:                   | Protocol                                                                                                                                                                                                                                                                                                                                                                                                                                                                                                                                                                                                                                                                                                                                                                                                                                                                                                                                                                                                                                                                                                                                                                                                                                                                            |
| Date Submitted by the Author:   | 05-May-2023                                                                                                                                                                                                                                                                                                                                                                                                                                                                                                                                                                                                                                                                                                                                                                                                                                                                                                                                                                                                                                                                                                                                                                                                                                                                         |
| Complete List of Authors:       | Dovel , Kathryn ; University of California Los Angeles, Division of Infectious Diseases ; Partners in Hope Medical Center, Implementation Science Department<br>Balakasi, Kelvin; Partners in Hope Medical Center, Implementation Science Department<br>Hubbard, Julie; University of California Los Angeles, Division of Infectious Diseases<br>Phiri, Khumbo; Partners in Hope Medical Center, Implementation Science Department<br>Nichols, Brooke ; Boston University, Department of Global Health; Health Economics and Epidemiology Research Office,<br>Coates, Thomas; University of California Los Angeles, Division of Infectious Diseases, School of Medicine<br>Kulich, Michal; Charles University, Department of Probability and Math Statistics<br>Chikuse, Elijah; Partners in Hope Medical Center, Implementation Science Department<br>Phiri, Sam; Partners in Hope Medical Center, Implementation Science Department<br>Long, Lawrence; Boston University School of Public Health, Department of Global Health; Faculty of Health Sciences University of the Witwatersrand, Department of Internal Medicine<br>Hoffman, Risa; University of California Los Angeles, Division of Infectious Diseases<br>Choko, Augustine; University of Malawi, College of Medicine |
| <b>Primary Subject Heading</b>: | HIV/AIDS                                                                                                                                                                                                                                                                                                                                                                                                                                                                                                                                                                                                                                                                                                                                                                                                                                                                                                                                                                                                                                                                                                                                                                                                                                                                            |
| Secondary Subject Heading:      | Global health, Health services research, Infectious diseases, Public health                                                                                                                                                                                                                                                                                                                                                                                                                                                                                                                                                                                                                                                                                                                                                                                                                                                                                                                                                                                                                                                                                                                                                                                                         |
| Keywords:                       | HIV & AIDS < INFECTIOUS DISEASES, Infection control < INFECTIOUS DISEASES, Clinical trials < THERAPEUTICS                                                                                                                                                                                                                                                                                                                                                                                                                                                                                                                                                                                                                                                                                                                                                                                                                                                                                                                                                                                                                                                                                                                                                                           |
|                                 |                                                                                                                                                                                                                                                                                                                                                                                                                                                                                                                                                                                                                                                                                                                                                                                                                                                                                                                                                                                                                                                                                                                                                                                                                                                                                     |

1  
2  
3  
4  
5  
6  
7  
8  
9  
10  
11  
12  
13  
14  
15  
16  
17  
18  
19  
20  
21  
22  
23  
24  
25  
26  
27  
28  
29  
30  
31  
32  
33  
34  
35  
36  
37  
38  
39  
40  
41  
42  
43  
44  
45  
46  
47  
48  
49  
50  
51  
52  
53  
54  
55  
56  
57  
58  
59  
60



1  
2  
3 **Identifying efficient linkage strategies for HIV self-testing (IDEaL): a study protocol for an**  
4 **individually randomized control trial**  
5  
6

7 Kathryn Dovel<sup>1,2§</sup>, Kelvin Balakasi<sup>1</sup>, Julie Hubbard<sup>1</sup>, Khumbo Phiri<sup>1</sup>, Brooke E. Nichols<sup>3,4</sup>, Thomas J.  
8 Coates<sup>1</sup>, Michal Kulich<sup>5</sup>, Elijah Chikuse<sup>2</sup>, Sam Phiri<sup>2</sup>, Lawrence Long<sup>3,4</sup>, Risa Hoffman<sup>1</sup>, Augustine  
9 Choko<sup>6</sup>.  
10

11  
12 **Author affiliations:**

13 <sup>1</sup> Division of Infectious Diseases, David Geffen School of Medicine, University of California Los  
14 Angeles, Los Angeles, CA, USA

15 <sup>2</sup> Partners in Hope, Lilongwe, Malawi

16 <sup>3</sup> Department of Global Health, Boston University School of Public Health, Boston, MA, USA

17 <sup>4</sup> Department of Internal Medicine, Faculty of Health Sciences, University of the Witwatersrand,  
18 Johannesburg, South Africa

19 <sup>5</sup> Department of Probability and Math. Statistics, Faculty of Mathematics and Physics, Charles University,  
20 Prague, Czech Republic

21 <sup>6</sup> College of Medicine, University of Malawi, Blantyre, Malawi  
22  
23  
24

25 **§ Corresponding Author:** Kathryn Dovel

26 Division of Infectious Diseases, David Geffen School of Medicine

27 10833 Le Conte Ave, Los Angeles, CA 90095

28 Phone: +13108838179

29 Email: [kdovel@mednet.ucla.edu](mailto:kdovel@mednet.ucla.edu) / [kldovel@gmail.com](mailto:kldovel@gmail.com)  
30  
31

32  
33 **E-mail addresses of authors:**

34 KD: [KDovel@mednet.ucla.edu](mailto:KDovel@mednet.ucla.edu)

35 KB: [kelvin@pihmalawi.com](mailto:kelvin@pihmalawi.com)

36 JH: [jhubbard@mednet.ucla.edu](mailto:jhubbard@mednet.ucla.edu)

37 KP: [khumbo@pihmalawi.com](mailto:khumbo@pihmalawi.com)

38 BN: [brooken@bu.edu](mailto:brooken@bu.edu)

39 TC: [TCoates@mednet.ucla.edu](mailto:TCoates@mednet.ucla.edu)

40 MK: [kulich@karlin.mff.cuni.cz](mailto:kulich@karlin.mff.cuni.cz)

41 EC: [elijah@pihmalawi.com](mailto:elijah@pihmalawi.com)

42 SP: [samphiri@pihmalawi.com](mailto:samphiri@pihmalawi.com)

43 LL: [lclong@bu.edu](mailto:lclong@bu.edu)

44 RH: [RHoffman@mednet.ucla.edu](mailto:RHoffman@mednet.ucla.edu)

45 AC: [augutc@gmail.com](mailto:augutc@gmail.com)  
46  
47

48 **Word Count:** Abstract: 304; Manuscript: 3,967

49 **Keywords:** HIV, men, ART initiation, ART retention, Stepped interventions, sub-Saharan Africa

50 **Date and version:** 5 May 2023: Version 3  
51  
52  
53  
54  
55  
56  
57  
58  
59  
60

## ABSTRACT

### Introduction

Men in sub-Saharan Africa are less likely than women to initiate antiretroviral therapy (ART) and more likely to have longer cycles of disengagement from ART programs. Treatment interventions that meet the unique needs of men are needed, but they must be scalable. We will test the impact of various interventions on six-month retention in ART programs among men living with HIV who are not currently engaged in care (never initiated ART and ART clients with treatment interruption).

### Methods and Analysis

We will conduct a pragmatic, individually randomized, non-blinded, controlled trial. “Non-engaged” men will be randomized 1:1:1 to either a Low-Intensity, High-Intensity, or Stepped arm. The Low-Intensity Intervention includes one-time male-specific counseling + facility navigation only. The High-Intensity Intervention offers immediate outside-facility ART initiation + male-specific counseling + facility navigation for follow-up ART visits. In the Stepped arm, intervention activities build in intensity over time for those who do not reengage in care with the following steps: 1) one-time male-specific counseling + facility navigation→2) ongoing male mentorship + facility navigation→3) outside-facility ART initiation + male-specific counseling + facility navigation for follow-up ART visits. Our primary outcome is 6-month retention in care. Secondary outcomes include cost-effectiveness and rates of adverse events. The primary analysis will be intention to treat with all eligible men in the denominator and all men retain in care at 6 months in the numerator. The proportions achieving the primary outcome will be compared with a risk ratio, corresponding 95% confidence interval and p-value computed using binomial regression accounting for clustering at facility level.

### Ethics and Dissemination

The Institutional Review Board of the University of California, Los Angeles and the National Health Sciences Research Council in Malawi have approved the trial protocol. Findings will be disseminated rapidly in national and international forums and in peer-reviewed journals and are expected to provide urgently needed information to other countries and donors.

**Trial registration number:** NCT05137210.

## ARTICLE SUMMARY

### Strengths and limitations

- IDEaL provides male-specific differentiated models of care aimed to improve men’s ART

1  
2  
3 outcomes. We specifically focus on building trusting relationships with health care workers and  
4 developing client-led, individualized strategies to overcome barriers to care.

- 5  
6  
7
- IDEaL will test the impact of a stepped intervention for men. This approach promises to improve  
8 the efficiency and reach of HIV programs for men as the highest-resource interventions will only  
9 be received by the minority of men who are most in need.
  - IDEaL develops and tests male-specific counseling curriculum that, if effective, could easily be  
10 taken to scale. Findings from the study will identify critical components for male-specific  
11 counseling, especially among men who struggle to be retained in HIV care.
  - IDEaL interventions do not change facility characteristics that may act as barriers to men's use of  
12 facility-based services. IDEaL focuses on providing outside-facility services for reaching men.
- 13  
14  
15  
16  
17  
18  
19  
20  
21  
22  
23  
24  
25  
26  
27  
28  
29  
30  
31  
32  
33  
34  
35  
36  
37  
38  
39  
40  
41  
42  
43  
44  
45  
46  
47  
48  
49  
50  
51  
52  
53  
54  
55  
56  
57  
58  
59  
60

## 1 INTRODUCTION

2 Men in sub-Saharan Africa (SSA) are underrepresented in HIV programs.<sup>1</sup> Men are less likely than women  
3 to know their HIV status and to initiate antiretroviral therapy (ART), and more likely to face treatment  
4 interruptions once in care.<sup>2</sup> Only 69% of men who start ART reach viral suppression compared to 77% of  
5 women.<sup>2</sup> As a result, men in the region are 37% more likely to die from AIDS-related causes as compared  
6 to women.<sup>3</sup>

7  
8 One contributor to men's poor HIV outcomes is an increased risk of disengagement from care. Engagement  
9 in ART programs is not static – many ART clients cycle through care, starting and stopping HIV care  
10 multiple times throughout their lifetime.<sup>4,5</sup> Up to 46% of ART clients experience treatment interruption,<sup>6–8</sup>  
11 and between 30–40% of those who return experience repeat treatment interruption within 6 months.<sup>9,10</sup> Men  
12 are particularly prone to cycling through ART programs, with more frequent stop-start instances and longer  
13 periods outside of care as compared to women.<sup>6,11–13</sup> Improving men's long-term engagement in HIV care  
14 is critical for men's health and reducing HIV transmission.<sup>14</sup>

15  
16 Men who disengage from HIV programs (either after testing HIV-positive or after enrolling in HIV care  
17 services) are frequently described as a difficult and 'hard-to-reach' population.<sup>15,16</sup> However, growing  
18 evidence suggests that men desire HIV services<sup>17,18</sup> but encounter multiple health systems barriers to care  
19 that make it impossible to stay in care long-term.<sup>19</sup> There is an urgent need to develop client-centered  
20 strategies tailored to men that facilitate men's engagement and re-engagement in HIV treatment programs.

21  
22 Some men may require male-specific interventions to facilitate engagement in HIV care. Men have less  
23 exposure to HIV services than women<sup>19,20</sup> and work demands may conflict with ART clinic schedules.<sup>21,22</sup>  
24 Difficult interactions with health care workers (HCWs) can also prevent men from engaging or re-engaging  
25 in care.<sup>23,24</sup> Furthermore, most ART counseling curricula do not target men and often lack the client-  
26 centered counseling needed to develop internal motivation to engage and stay engaged in care.

27  
28 Differentiated service delivery models (DSD) are now being developed to improve men's ART  
29 engagement throughout SSA.<sup>25–27</sup> As DSDs for men are developed, it is critical that strategies be feasible  
30 and cost-effective to allow scale-up. A "one size fits all" model is not as effective as more nuanced  
31 approaches.<sup>28–30</sup> Stepped interventions increase in intensity over time and are purposively designed to  
32 address prevailing barriers in the target population in order to positively affect the desired outcome.<sup>31,32</sup>  
33 An incremental, stepped approach may be the most appropriate and scalable way to improve men's care  
34 in low-resource settings. Men are not homogeneous: some men may require minimal support to engage in

1  
2  
3 35 care, while others may require extensive support. Stepped interventions allow programs to target the  
4 36 highest-resource interventions to the minority of men who need them most.

5  
6 37  
7  
8 38 The *Identifying efficient linkage strategies for HIV self-testing (IDEaL) trial* is an individually  
9 39 randomized control trial aimed to test the impact of various interventions on ART (re-) initiation and six-  
10 40 month retention among men living with HIV who are not currently engaged in HIV care in Malawi. We  
11 41 will compare a Stepped intervention against Low-Intensity and High-Intensity interventions to assess the  
12 42 impact of the Stepped intervention on men's use of ART services over time (see Supporting Information  
13 43 S1). The trial contributes to existing literature by testing male-specific, client-centered strategies to re-  
14 44 engage men in care. This is one of the first trials specifically designed with men's re-engagement in care  
15 45 in mind. If effective, such interventions may decrease repeat treatment interruption and duration of  
16 46 treatment interruptions among men, which can improve viral suppression and reduce onward HIV  
17 47 transmission.<sup>14</sup>

## 48 **METHODS AND ANALYSIS**

### 49 **Objectives**

50 Our primary objective is to test the effect of a male-specific, Stepped intervention on men's 6-month  
51 retention in ART care compared to male-specific Low-Intensity and High-Intensity interventions  
52 (retention is defined as <28-days late for their ART appointment). Secondary objectives are to understand  
53 the effect of a Stepped intervention on: (1) ART initiation; (2) the presence of adverse events (i.e.,  
54 unwanted disclosure, end of relationship, or intimate partner violence (IPV)); (3) intervention  
55 acceptability; and (4) cost-effectiveness.

### 57 **Trial Design**

58 IDEaL is a programmatic, individually randomized, non-blinded controlled trial design. We will recruit  
59 men from 15 high-burden health facilities in Malawi using medical chart reviews to identify men who are  
60 living with HIV but not engaged in HIV care.

### 62 **Randomization**

63 Individual men will be block randomized using R by a biostatistician using a 1:1:1 ratio to either the  
64 Stepped, Low-Intensity, or High-Intensity study arm using a computer-generated program. Participants  
65 will be randomized in blocks of 3 and 6, depending on the number of men available for recruitment at  
66 each facility. After enrolling in the trial and completing a baseline survey, men will be assigned to a study  
67 ID based on the randomization list. Study ID's will be linked with the pre-assigned blocked



1  
2  
3 68 randomization and pre-loaded into the tablet device, but will be unknown to the study staff until survey  
4 69 and randomization modules are completed and saved, ensuring randomization cannot be manipulated by  
5 70 the study staff. Once finalized, the randomization results will appear on the tablet device as a picture, and  
6 71 will be shown to the participant to maximize transparency and study buy-in.  
7  
8  
9  
10

72

### 73 **Interventions**

74 The effectiveness of the Stepped Intervention will be compared to a Low-Intensity Intervention (one time  
75 male-specific counseling + facility navigation defined as escort to the facility (if desired) and orientation  
76 to the ART clinic and procedures) and to a High-Intensity Intervention (outside-facility ART initiation +  
77 male-specific counseling + facility navigation for follow-up ART visits). Across all arms, men who do  
78 not (re-)initiate in ART will continue receiving follow-up visits for up to three months, depending on  
79 preferences of the client. The number of intervention visits delivered for each participant will be  
80 documented.  
81

82

#### 82 ***Arm 1: Low-Intensity Arm: Male-specific counseling + facility navigation***

83 Participants randomized to the Low-Intensity Arm will be traced in the community and receive a one-time,  
84 one-on-one male-specific counseling session, using client-centered service techniques.<sup>33</sup> All counseling  
85 sessions will be completed by a lay cadre male HIV counselor (called Patient Supporter in Malawi) trained  
86 in the study counseling curriculum. Patient supporters are responsible for routine tracing, linkage support  
87 medical record documentation and counseling.  
88

89

89 The male-specific curriculum is developed specifically for this trial. Ministry of Health counseling  
90 materials is adapted to meet the specific needs of men, based on formative in-depth interviews, focus group  
91 discussions, and a systematic literature review. Adaptations will include exploring topics of most concern  
92 to men in Malawi (i.e., earning money while HIV-positive, side effects and concerns regarding lifelong  
93 medication, ART as a tool to provide and care for family, etc.). The materials will also include language  
94 and pictures that resonate with men (i.e., emphasizing how HIV and HIV services interact with men's  
95 strength, responsibility, planning for the future), and male-specific case studies of challenges men face and  
96 how they overcome them. The adapted male-specific counseling curriculum will be developed into a  
97 standardized counseling flip chart (i.e., job aid).  
98

99

100 Men who wish to (re-)initiate ART will be offered facility navigation and facility-based services at the  
101 facility of their choice. Participants will be escorted to the facility (if desired), orientated to the ART clinic

1  
2  
3 102 procedures, and introduced to other HCWs who routinely work at the facility. Facility navigation is intended  
4 103 to facilitate a positive experience for men by helping them feel comfortable and confident navigating clinic  
5 104 spaces. Men may access all ART clinical services at the health facility of their choice (but counseling  
6 105 described above will be provided in the community). The client will be responsible for all transport costs  
7 106 related to return to the facility in all study arms.  
8  
9  
10  
11

12 108 Participants who do not (re-)initiate in care within 14 days will be offered followed-up counseling every  
13 109 two weeks until participants (re-)initiate in care or inform the counselor that they do not wish to be  
14 110 contacted.  
15  
16  
17

18 111  
19 112 ***Arm 2: High-Intensity Arm: Male-specific counseling + outside-facility ART initiation + facility***  
20 113 ***navigation***

21  
22 114 Participants in the High-Intensity Arm will be offered community-based male-specific counseling by HIV  
23 115 counselors (described above), and offered ART (re-)initiation outside-facility (either at home or another  
24 116 location in the community of their choice). Those who choose outside-facility ART initiation will be  
25 117 referred to a male study nurse who will meet participants one-on-one at times and locations that are  
26 118 convenient for participants. The nurse will offer a brief counseling session, reviewing key topics from male-  
27 119 specific counseling curriculum that is most relevant to the individual participant. Nurses will then conduct  
28 120 WHO staging. Individuals classified as WHO Stage 3 or 4 will be referred (and escorted, if desired) to the  
29 121 nearest public health facility for additional services. Participants classified as WHO Stage 1 or 2 will be  
30 122 given same day ART. Prior to their 4-week follow-up ART appointment participants will receive facility  
31 123 navigation by the same nurse and afterward access ART services.  
32  
33  
34  
35  
36  
37  
38

39 125 Participants who choose facility-based ART (re-)initiation will be referred (and escorted, if desired) by the  
40 126 HIV counselor (lay cadre) to the nearest facility of their choice and receive facility navigation on a day and  
41 127 time that is convenient for them.  
42  
43  
44

45 128  
46 129 Men who do not (re-)initiate in care will be offered biweekly follow-up counseling at times and intervals  
47 130 determined by participants' preferences until they engage in care or inform the nurse that they no longer  
48 131 wish to be contacted.  
49  
50  
51

52 133 ***Arm 3: Stepped Arm***

53 134 The Stepped arm will build in intensity over time for those who have not (re-)initiate in care 14-days after  
54 135 study enrollment, or who do not return for their first ART follow-up appointment after (re-)initiation (see  
55  
56  
57  
58  
59  
60

1  
2  
3 136 Fig 1). Individuals will move to the next “step” every 2-weeks, moving from the lightest to the most  
4  
5 137 intensive interventions over the course of 6 weeks until (re-)initiation has been achieved. The Stepped  
6  
7 138 arm includes the following steps:

8 139

9 140 *Step 1: Male-Specific Counseling + Facility Navigation and Facility-Based ART Services:* Step 1 includes  
10  
11 141 the same components described in the Low-Intensity Arm. Briefly, participants will be traced in the  
12  
13 142 community and receive a one-time male-specific counseling session, with repeat counseling sessions if  
14  
15 143 participants do not (re-)initiate within 14 days after the first counseling session. Men who wish to (re-)  
16  
17 144 initiate in care will be provided facility navigation and standard of care facility-based services.

17 145

19 146 *Step 2: Ongoing Motivational Interviewing + Facility Navigation and Facility-Based ART Services:* Men  
20  
21 147 who do not (re-)initiate in care (either have not engaged ART within 14 days of enrollment or do (re-)initiate  
22  
23 148 ART but are  $\geq 7$ -days late for a follow-up appointment) will move to the next ‘step’ of the intervention,  
24  
25 149 which adds ongoing motivational interviewing to their package of activities. Motivational interviewing is  
26  
27 150 a client-centered, client-led method for counseling that helps participants identify barriers to a desired  
28  
29 151 outcome and develop personalized solutions.<sup>34,35</sup> The strategy has successfully been used with ART  
30  
31 152 clients.<sup>36</sup> Mentors will work with participants to: (1) build self-efficacy, (2) identify internal motivations  
32  
33 153 for the desired behavior, and (3) establish strategies and short- and long-term goals needed to reach ART  
34  
35 154 initiation and retention. A male mentor specifically trained in motivational interviewing adapted to the local  
36  
37 155 context and male population will provide ongoing, one-on-one in-depth counseling, motivational  
38  
39 156 interviewing, and general “check-ins” approximately twice within a two-week period. The mentor will not  
40  
41 157 necessarily be HIV-positive (unlike other mentorship models) as the Malawi Ministry of Health has moved  
42  
43 158 away from HIV-positive peer mentor cadres. However, they will be experienced in HIV counseling and  
44  
45 159 trained on male-specific needs. Motivational interviewing will take place in a location preferred by the  
46  
47 160 participant, likely in the community. Participants who choose to (re) initiate ART can access ART services  
48  
49 161 at the facility of their choice and will be given facility navigation as described in Arm 1.

44 162

46 163 *Step 3: Outside-facility ART initiation + Male-Specific Counseling:* Men who are not engaged after Step 2  
47  
48 164 (either have not (re-)initiated ART  $\leq 14$  days after moving to Step 2 or did (re-)initiate but are  $\geq 7$ -days late  
49  
50 165 for a follow-up ART appointment) will be offered outside-facility ART by a male nurse certified in HIV  
51  
52 166 counseling. Steps will follow those outlined in the High Intensity Arm, with a brief counseling session,  
53  
54 167 WHO staging, same-day ART re-initiation for those WHO stage 1 or 2, and facility navigation for their 4-  
55  
56 168 week follow-up appointment.

55 169

1  
2  
3 170 [Figure 1 here]  
4

5 171

6 172 **Trial setting**

7  
8 173 The study will take place in central and southern Malawi. Malawi has an HIV prevalence of 9.6%<sup>37</sup> and, of  
9 174 the estimated 330,000 men living with HIV in the country, 54,500 are not in care.<sup>38</sup> Men in Malawi live in  
10 175 primarily rural settings, are self-employed, subsistence farmers, the minority have regular access to a private  
11 176 phone, and most are highly mobile.<sup>39,40</sup>  
12  
13 177

14  
15  
16 178 **Population**

17 179 We will recruit men from 13 high-burden health facilities in Malawi, using medical chart reviews to identify  
18 180 men living with HIV who are not engaged in HIV care. Study facilities will vary by facility type  
19 181 (hospital/health center), management (public/mission), location (rural/urban), and region (central/southern  
20 182 Malawi).  
21  
22 183

23  
24 184 Eligibility criteria for men include: (1)  $\geq 15$  years of age; (2) live in facility catchment area; and (3) tested  
25 185 HIV-positive and either (a) self-report having not yet initiated ART within 7-days of testing HIV-positive,  
26 186 (b) initiated ART but are at risk of immediate default (i.e.,  $\geq 7$ -days late for their 30-day ART refill  
27 187 appointment), or (c) initiated ART and attended their first refill appointment but later defaulted (i.e.  $\geq 28$ -  
28 188 days late to care). For those who never initiated ART and do not have proof of a confirmatory HIV test,  
29 189 study staff will offer an HIV self-test kit prior to enrollment, to confirm a positive HIV status. Those who  
30 190 choose to initiate ART will receive the standard Determine and Unigold confirmatory tests prior to ART  
31 191 initiation, following routine care.  
32  
33 192

34  
35  
36 193 **Study outcomes**

37  
38 194 The primary outcome is the proportion of men who are retained in ART care 6-months after (re-)  
39 195 engagement. Secondary outcomes include: (1) ART initiation; (2) adverse events experienced by men or  
40 196 their female partners (i.e., unwanted disclosure, end of relationship, or intimate partner violence (IPV);  
41 197 (3) intervention acceptability; and (4) cost-effectiveness. ART retention outcomes will be measured  
42 198 through medical chart reviews, while secondary outcomes will be measured through self-reports. Process  
43 199 outcomes include: (1) the proportion of men who were successfully traced; (2) the proportion of eligible  
44 200 men who consented to participate; (3) men's experience with the intervention; and (4) the quality of the  
45 201 intervention.  
46  
47 202

48  
49  
50 203 ***Sample size considerations***

1  
2  
3 204 We powered the study to detect differences in 6-month retention between Stepped and Low-Intensity Arms,  
4 205 and the Stepped and High-Intensity Arms. Based on pilot data, we assumed that 40% of men in the Low-  
5 206 Intensity Arm, 60% in the Stepped Arm, and 80% in the High-Intensity Arm will engage in ART and be  
6 207 retained at 6-months. Any man lost to follow-up will be treated as a failure for the outcome evaluation.  
7  
8 208 With 181 men per arm and 20% loss to follow-up from the study in all arms, the power for detecting the  
9 209 specified differences between Stepped and Low Intensity arms and between Stepped and High-Intensity  
10 210 arms will be 0.8, with test level 0.025 after Bonferroni adjustment for two comparisons. We will have 0.99  
11 211 power to detect specified differences between Low Intensity and High Intensity arms. The calculation is  
12 212 based on asymptotic normality of log odds ratio.<sup>41</sup> We need to enroll and randomize 181 men per arm (a  
13 213 total of 543 men living with HIV).  
14  
15  
16  
17  
18  
19  
20

### 21 215 **Data Collection**

22 216 Study recruitment, enrollment, and data collection will be conducted by study staff, who are distinct from  
23 217 local HCWs implementing the interventions.  
24  
25

### 26 218 27 219 **Recruitment**

28 220 Men will be identified through both medical register reviews and in-person recruitment at participating  
29 221 health facilities. Various medical charts will be reviewed to identify different types of eligible men: HIV  
30 222 testing and counseling (HTC) to identify men who tested HIV positive but never initiated ART; client  
31 223 follow-up registers to identify those who initiated but never returned for their first ART appointment, or  
32 224 those who defaulted from care; and index counseling and testing (ICT) registers to identify male partners  
33 225 of female ART clients (Figure 2). In-person recruitment will involve screening men at outpatient  
34 226 departments (OPD) because our previous research has found that men in Malawi frequent OPD settings  
35 227 for health needs,<sup>17</sup> and our formative work suggests that men who disengage from ART services still  
36 228 frequent the OPD for care. In-person recruitment will be used for all client types.  
37  
38  
39  
40  
41  
42  
43

44 230 [Figure 2 here]  
45  
46

### 47 232 **Tracing and Eligibility Screening**

48 233 Study staff will trace potential participants identified through medical chart reviews via phone (if  
49 234 available) or home visits based on tracing data provided in medical documentation. All potential  
50 235 participants will be traced up to three times before being considered lost to follow-up. All screening and  
51 236 enrollment processes will take place in-person.  
52  
53  
54  
55  
56  
57  
58  
59  
60

### 238 ***Consent, Enrollment, and Baseline Survey***

239 Men who are eligible for the study will complete written informed consent and complete a baseline  
240 survey immediately following enrollment. The baseline survey will collect data on key demographic  
241 variables (marital status, number of children, employment, self-rated health) and previous engagement  
242 with HIV and non-HIV health services. All surveys will be conducted in the local language (Chichewa)  
243 by trained study staff using electronic tablets. Surveys will be programmed using SurveyCTO software  
244 (<http://www.surveyccto.com>).

245

### 246 ***Follow-Up Data***

247 Study staff will administer follow-up surveys at 2- and 4-months after enrollment. Follow-up surveys  
248 will measure exposure to (and acceptability of) the interventions, changes in key demographics since  
249 enrollment (i.e., marital status, number of children, employment, self-rated health), any adverse events  
250 since enrollment (i.e., unwanted status disclosure, termination of relationship due to the intervention), and  
251 use of ART services. The location and specific time of the follow-up survey will be based on participant  
252 preference.

253

254 Medical chart reviews will be conducted to assess men's engagement with ART services 6-months after  
255 study enrollment. Individuals without a medical chart outcome will be followed-up in person and their  
256 health passport, a pocket medical record where providers record data during health visits, will be  
257 reviewed to collect the ART outcome. Men who cannot be reached or are lost to follow-up in any arm  
258 will be counted as failures for that specific ART outcome of interest: (re-)initiation or 6-month retention).

259

### 260 ***Patient and Public Involvement***

261 Extensive formative work informed the development of the study protocol including in-depth interviews,  
262 focus group discussions, and a systematic literature review. The study protocol and tools were presented  
263 to Ministry of Health, national stakeholders and implementing partners (see Supporting Information S2).

264

### 265 ***Cost data***

266 The average cost per successful outcome (6-month retention) will be calculated and compared across  
267 arms incrementally. We will use micro-costing methods by creating an inventory of the resources used to  
268 achieve the observed study outcomes including: (1) standard counseling interactions (staff cadre, training  
269 received, duration of interaction and distance from facility travelled where applicable); (2) motivational  
270 interviewing interactions (staff cadre, training received, duration of interaction and distance from facility  
271 travelled where applicable); (3) provider interactions (staff cadre, training received, duration of



1  
2  
3 272 interaction and distance from facility travelled where applicable); and (4) cost of reminder messages sent,  
4 273 when messages are delivered telephonically instead of in person. For each study patient, the quantity  
5 274 (number of units) of resources used will be determined. Costs will be measured from the health care  
6 275 provider perspective. Unit costs of resources, which are not human subject data, will be obtained from  
7 276 external suppliers and the health facilities' finance and procurement records and multiplied by the  
8 277 resource usage data to provide an average cost per study patient in each study arm. A cost-effectiveness  
9 278 analysis will be conducted by dividing the incremental cost between two arms by the incremental  
10 279 effectiveness (number of people retained at 6-months) in the respective arms.  
11  
12  
13  
14  
15  
16

280

### 281 **Analysis plan**

17  
18 282 Data analysis will be conducted in R: A Language and Environment for Statistical Computing (R  
19 283 Foundation for Statistical Computing). We will use the Consolidated Standards of Reporting Trials  
20 284 (CONSORT) standards for reporting trial outcomes.<sup>42</sup> Using an intention-to-treat analysis, all randomized  
21 285 men will be included in the analysis of the primary outcome; men with missing outcomes due to loss to  
22 286 follow-up will be treated as outcome failures. We will calculate descriptive statistics, including mean,  
23 287 standard deviation, range, and frequency distributions for the demographic characteristics and study  
24 288 outcomes by study arm. The primary outcome and all other binary outcomes will be analyzed by logistic  
25 289 regression models with age, marital status, health care facility and other key sociodemographic variables  
26 290 included as covariates. The intervention effects will be tested by Wald tests of the relevant regression  
27 291 parameters. The hypotheses of no difference between the stepped arm and the low/high intensity arm will  
28 292 be rejected if the p-value is smaller than 0.025 (Bonferroni adjustment). Confidence intervals for odds  
29 293 ratios comparing the stepped arm to the low intensity and high intensity arms with coverage probabilities  
30 294 0.975 will be calculated by profile likelihood methods. Due to the Bonferroni adjustment, the  
31 295 simultaneous coverage probability of both intervals will be at least 0.95. To address the secondary  
32 296 objectives, more elaborate logistic regression models will be built for each of the binary outcomes with  
33 297 available individual-, community-, and facility-level factors included as covariates in addition to the  
34 298 intervention status.  
35  
36  
37  
38  
39  
40  
41  
42  
43  
44  
45

299

### 300 *Nested studies*

46  
47  
48 301 A series of nested, mixed methods studies will be conducted to identify factors associated with ART  
49 302 engagement within each intervention arm, and to explore the implementation and acceptability of  
50 303 interventions.  
51  
52  
53

304

### 305 *Qualitative data collection*

1  
2  
3 306 Guided by Grounded Theory, we will conduct cross-sectional in-depth interviews with a random subset of  
4 307 40 male participants per arm (120 total) throughout the study period. Clients will be randomly selected at  
5 308 various times of the study using computer-generated randomization, stratifying the sample by arm and  
6 309 successful trial outcomes (i.e., did clients re-initiate ART and/or reach 6-month retention). Data will  
7 310 assess characteristics of men who fail to engage in care, contextualize decisions around ART initiation  
8 311 and retention, and identify additional strategies that may be needed for men to successfully engage and be  
9 312 retained in ART programs (see Supporting Information 3). Data collection tools and analysis plans will be  
10 313 informed by the Andersen's Emerging Model of Health Services Use, phase 4<sup>43</sup> that examines multi-level  
11 314 factors that influence health outcomes. Specifically, it examines the interaction of: 1) environment and  
12 315 structure of health services; 2) clients' enabling resources; and 3) clients' perceived need/motivation to  
13 316 access services. Qualitatively understanding how the IDEaL interventions influence these levels, and what  
14 317 barriers still remain, will help refine future interventions.

15  
16 318  
17 319 Interviews will be conducted by a trained male interviewer in the local language. Interviews will be  
18 320 digitally recorded, transcribed, and translated into English for analysis. Four investigators will pilot a  
19 321 codebook by independently reading and coding a randomly-selected subset of transcripts. Through an  
20 322 iterative consultative process and using iterative and deductive coding strategies, each investigator will  
21 323 revise their respective codebook until there is high interrater reliability among the group. All transcripts  
22 324 will be coded in Atlas.ti v8.3<sup>44</sup> and text analyzed using constant comparison methods<sup>45</sup> to compare and  
23 325 contrast themes that arise within and between interventions and trial outcomes.

### 24 326 25 327 *Implementation Log Sheet*

26 328 During the course of the intervention, HCWs will keep daily logs as one of the study monitoring and  
27 329 evaluation tools to assess the implementation of the intervention for each participant. Primary events to be  
28 330 recorded in the daily logs are: (1) unable to reach participant (and reason); (2) contacted participant; (3)  
29 331 intervention provided (and notes about the challenges and successes of the interaction); and (4) other  
30 332 comments relevant to intervention implementation. Each event will be recorded with a corresponding  
31 333 date. Logs will be digitized in English. Findings may influence how similar interventions are  
32 334 implemented in the future.

### 33 335 34 336 **Ethics and Dissemination**

35 337 The IDEaL trial is registered with ClinicalTrials.gov as NCT05137210. The protocol was approved by the  
36 338 Institutional Review Board of the University of California, Los Angeles and the National Health Sciences  
37 339 Research Council in Malawi. Study findings will be disseminated through peer-reviewed journal articles,



340 national and international conference presentations, and meetings with Malawi Ministry of Health,  
341 facility, and community stakeholders.

342

## 343 **DISCUSSION**

344 Studies have reported poorer outcomes for HIV testing, treatment initiation, and treatment adherence in  
345 men compared to women<sup>2</sup> for over a decade.<sup>46,47</sup> Men are often portrayed as difficult, hard-to-reach, and  
346 actively avoiding health facilities. In IDEaL, we aim to investigate whether men really are hard-to-reach  
347 or, will men engage in care when services are offered in ways that are accessible to them and resonate  
348 with their needs, as growing evidence suggests.<sup>17</sup> We propose to test a Stepped intervention that increases  
349 in intensity over time against Low- and High-intensity interventions – all tailored to men – to identify the  
350 most cost effective strategy to (re-)initiate men in HIV treatment services in Malawi.

351

352 IDEaL is different from other ART engagement and re-engagement interventions in several important  
353 ways. First, we will enroll men living with HIV across the treatment cascade, including those who have  
354 never initiated ART, those who are at risk of immediate default after initiation, and those who have been  
355 in care but subsequently default. Formative research suggests that barriers to ART initiation and re-  
356 initiation may be similar,<sup>48</sup> however most interventions focus specifically on either first-time initiation or  
357 re-engagement, but not both. Our study will assess if one overarching program can improve men's  
358 engagement across the treatment cascade, regardless of whether they are starting ART for the first time or  
359 returning to care after a period of disengagement. One overarching intervention may be more scalable  
360 than multiple, separate interventions across the cascade. Second, we tailor interventions to men's unique  
361 needs and motivations, based on extensive formative work. While innovative interventions for men are  
362 underway,<sup>25–27</sup> few have rigorously tested the impact of male-tailored interventions on ART  
363 engagement.<sup>49</sup>

364

365 Finally, we will test a Stepped intervention that builds in intensity over time until men (re-)initiate in care.  
366 This approach allows men who are ready to (re-)initiate to do so at minimal cost to the health system,  
367 while those who need additional support can receive more resource-intensive interventions to support  
368 their ART engagement.<sup>31</sup> Stepped interventions have been effective in other settings and can address  
369 multiple barriers faced by the target population with minimal cost.<sup>31,32</sup> Findings from IDEaL will provide  
370 crucial knowledge to how best men can be reached and can inform intervention scale-up.

371

372 **Contributorship statement:** KD and AC conceptualized the study. KD is responsible for funding  
373 acquisition. KD, KB, JH, KP, BN, RH and AC developed study protocol and materials. JH, KB, KP, and

1  
2  
3 374 EC will implement the study. KD, MK, KB, TC, BN, LL, TC, and AC developed the analysis plan and  
4  
5 375 KD, MK, KB, and AC will analyze the data. KD and EC wrote the first draft and KB, JH, KP, BN, LL,  
6  
7 376 RH, SP, EC, RH, TC, and AC edited following drafts. All authors have read and approved the final  
8  
9 377 manuscript.  
10

378

11 379 **Competing interests:** The authors declare that they have no competing interests.  
12

13 380 **Funding:** The work was supported by the Bill and Melinda Gates Foundation grant number INV-001423.  
14

15 381 KD was supported by National Institute of Mental Health of the National Institutes of Health grant  
16

17 382 number R01-MH122308, Fogarty International grant number K01-TW011484-01 and UCLA GSTTP  
18

19 383 (grant number N/A). LL was supported by the National Institute of Mental Health of the National  
20

21 384 Institutes of Health under grant number K01MH119923. The content is solely the responsibility of the  
22

23 385 authors and does not necessarily represent the official views of the National Institutes of Health.  
24

386

25 387 **Acknowledgements:** We wish to thank the Malawi Ministry of Health for their support of this trial. We  
26

27 388 would also like to acknowledge Joep van Oosterhout, Misheck Mphande, Isabella Robson, Thoko Banda,  
28

29 389 Peter Mwamlima, and Eric Lungu for their contributions to protocol development and for their support of  
30

31 390 study implementation.  
32  
33  
34  
35  
36  
37  
38  
39  
40  
41  
42  
43  
44  
45  
46  
47  
48  
49  
50  
51  
52  
53  
54  
55  
56  
57  
58  
59  
60

## REFERENCES

1. Cornell M, Majola M, Johnson LF, Dubula-Majola V. HIV services in sub-Saharan Africa: the greatest gap is men. *The Lancet*. 2021;397(10290):2130-2132.
2. AIDSinfo | UNAIDS. Accessed February 21, 2023. <https://aidsinfo.unaids.org/>
3. Druyts E, Dybul M, Kanters S, et al. Male sex and the risk of mortality among individuals enrolled in antiretroviral therapy programs in Africa: a systematic review and meta-analysis. *Aids*. 2013;27(3):417-425.
4. Ehrenkranz P, Rosen S, Boulle A, et al. The revolving door of HIV care: Revising the service delivery cascade to achieve the UNAIDS 95-95-95 goals. *PLoS Medicine*. 2021;18(5):e1003651.
5. Grimrud A, Wilkinson L, Eshun-Wilson I, Holmes C, Sikazwe I, Katz IT. Understanding engagement in HIV programmes: how health services can adapt to ensure no one is left behind. *Current HIV/AIDS Reports*. 2020;17:458-466.
6. Kranzer K, Lewis JJ, Ford N, et al. Treatment interruption in a primary care antiretroviral therapy programme in South Africa: cohort analysis of trends and risk factors. *Journal of acquired immune deficiency syndromes (1999)*. 2010;55(3):e17.
7. Mee P, Rice B, Lemsalu L, et al. Changes in patterns of retention in HIV care and antiretroviral treatment in Tanzania between 2008 and 2016: an analysis of routinely collected national programme data. *Journal of global health*. 2019;9(1).
8. Tomescu S, Crompton T, Adebayo J, et al. Factors associated with an interruption in treatment of people living with HIV in USAID-supported states in Nigeria: a retrospective study from 2000–2020. *BMC public health*. 2021;21:1-8.
9. Nakiwogga-Muwanga A, Musaazi J, Katabira E, Worodria W, Talisuna SA, Colebunders R. Patients who return to care after tracking remain at high risk of attrition: experience from a large HIV clinic, Uganda. *International journal of STD & AIDS*. 2015;26(1):42-47.
10. Teklu AM, Yirdaw KD. Patients who restart antiretroviral medication after interruption remain at high risk of unfavorable outcomes in Ethiopia. *BMC Health Services Research*. 2017;17(1):1-8.
11. Lopez-Varela E, Augusto O, Fuente-Soro L, et al. Quantifying the gender gap in the HIV care cascade in southern Mozambique: We are missing the men. *Plos one*. 2021;16(2):e0245461.
12. Mody A, Eshun-Wilson I, Sikombe K, et al. Longitudinal engagement trajectories and risk of death among new ART starters in Zambia: A group-based multi-trajectory analysis. *PLOS medicine*. 2019;16(10):e1002959.
13. Gosset A, Protopopescu C, Larmarange J, et al. Retention in care trajectories of HIV-positive individuals participating in a universal test-and-treat program in rural South Africa (ANRS 12249 TasP Trial). *Journal of Acquired Immune Deficiency Syndromes (1999)*. 2019;80(4):375.
14. Monod M, Brizzi A, Galiwango RM, et al. Growing gender disparity in HIV infection in Africa: sources and policy implications. *medRxiv*. Published online 2023:2023-03.
15. Esacove AW. Good sex/bad sex: the individualised focus of US HIV prevention policy in sub-Saharan Africa, 1995–2005. *Sociology of health & illness*. 2013;35(1):33-48.
16. Poulin M, Dovel K, Watkins SC. Men with money and the “vulnerable women” client category in an AIDS epidemic. *World Development*. 2016;85:16-30.
17. Dovel K, Balakasi K, Gupta S, et al. Frequency of visits to health facilities and HIV services offered to men, Malawi. *Bulletin of the World Health Organization*. 2021;99(9):618.
18. Chamberlin S, Mphande M, Phiri K, Kalande P, Dovel K. How HIV Clients Find Their Way Back to the ART Clinic: A Qualitative Study of Disengagement and Re-engagement with HIV Care in Malawi. *AIDS and Behavior*. 2022;26(3):674-685.
19. Dovel K, Dworkin SL, Cornell M, Coates TJ, Yeatman S. Gendered health institutions: examining the organization of health services and men’s use of HIV testing in Malawi. *Journal of the International AIDS Society*. 2020;23:e25517.

20. Yeatman S, Chamberlin S, Dovel K. Women's (health) work: a population-based, cross-sectional study of gender differences in time spent seeking health care in Malawi. *PLoS One*. 2018;13(12):e0209586.
21. Colvin CJ. Strategies for engaging men in HIV services. *The Lancet HIV*. 2019;6(3):e191-e200.
22. Phiri K, McBride K, Moucheraud C, et al. Community and health system factors associated with antiretroviral therapy initiation among men and women in Malawi: a mixed methods study exploring gender-specific barriers to care. *International health*. 2021;13(3):253-261.
23. Ware NC, Wyatt MA, Geng EH, et al. Toward an understanding of disengagement from HIV treatment and care in sub-Saharan Africa: a qualitative study. *PLoS medicine*. 2013;10(1):e1001369.
24. Layer EH, Brahmabhatt H, Beckham SW, et al. "I pray that they accept me without scolding." Experiences with disengagement and re-engagement in HIV care and treatment services in Tanzania. *AIDS patient care and STDs*. 2014;28(9):483-488.
25. Bell J, Sharma S, Malone S, et al. Targeting interventions for HIV testing and treatment uptake: an attitudinal and behavioural segmentation of men aged 20–34 in KwaZulu-Natal and Mpumalanga, South Africa. *PloS one*. 2021;16(3):e0247483.
26. van Rooyen H, Makusha T, Joseph P, et al. Zwakala Ndoda: a cluster and individually randomized trial aimed at improving testing, linkage, and adherence to treatment for hard-to reach men in KwaZulu-Natal, South Africa. *Trials*. 2019;20(1):1-14.
27. MenStar Coalition | Ending AIDS for all. MenStar Coalition. Accessed March 15, 2023. <https://www.menstarcoalition.org/>
28. Grimsrud A, Bygrave H, Doherty M, et al. Reimagining HIV service delivery: the role of differentiated care from prevention to suppression. *Journal of the International AIDS Society*. 2016;19(1).
29. Duncombe C, Rosenblum S, Hellmann N, et al. Reframing HIV care: putting people at the centre of antiretroviral delivery. *Tropical Medicine & International Health*. 2015;20(4):430-447.
30. Hagey JM, Li X, Barr-Walker J, et al. Differentiated HIV care in sub-Saharan Africa: a scoping review to inform antiretroviral therapy provision for stable HIV-infected individuals in Kenya. *AIDS care*. 2018;30(12):1477-1487.
31. Bower P, Gilbody S. Stepped care in psychological therapies: access, effectiveness and efficiency: narrative literature review. *The British Journal of Psychiatry*. 2005;186(1):11-17.
32. McNairy ML, Lamb MR, Gachuhi AB, et al. Effectiveness of a combination strategy for linkage and retention in adult HIV care in Swaziland: The Link4Health cluster randomized trial. *PLoS medicine*. 2017;14(11):e1002420.
33. Hubbard J, Mphande M, Robson I, Balakasi K, Phiri K. Core components of male-specific person-centered care: a qualitative analysis from client and healthcare worker perspectives in Malawi. In: ; 2023.
34. Miller WR, Rose GS. Toward a theory of motivational interviewing. *American psychologist*. 2009;64(6):527.
35. Rollnick S, Miller WR, Butler CC, Aloia MS. Motivational interviewing in health care: helping patients change behavior. Published online 2008.
36. Hill S, Kavookjian J. Motivational interviewing as a behavioral intervention to increase HAART adherence in patients who are HIV-positive: a systematic review of the literature. *AIDS care*. 2012;24(5):583-592.
37. Focus on: Malawi | UNAIDS. Accessed March 15, 2023. [https://www.unaids.org/en/20190402\\_country\\_focus\\_Malawi](https://www.unaids.org/en/20190402_country_focus_Malawi)
38. Malawi | UNAIDS. Accessed March 15, 2023. <https://www.unaids.org/en/regionscountries/countries/malawi>
39. Feldacker C, Emch M, Ennett S. The who and where of HIV in rural Malawi: Exploring the effects of person and place on individual HIV status. *Health & place*. 2010;16(5):996-1006.
40. Mandiwa C, Namondwe B. Uptake and correlates of HIV testing among men in Malawi: evidence from a national population-based household survey. *BMC health services research*. 2019;19:1-8.

41. Jewell NP. *Statistics for Epidemiology*. CRC press; 2003.
42. Schulz KF, Altman DG, Moher D. CONSORT 2010 statement: Updated guidelines for reporting parallel group randomized trials. *Annals of Internal Medicine*. 2011;154(4):291-292.
43. Andersen RM. National health surveys and the behavioral model of health services use. *Medical care*. Published online 2008:647-653.
44. ATLAS.ti 9 [computer program].
45. Glaser BG. The constant comparative method of qualitative analysis. *Social problems*. 1965;12(4):436-445.
46. Higgins JA, Hoffman S, Dworkin SL. Rethinking gender, heterosexual men, and women's vulnerability to HIV/AIDS. *American journal of public health*. 2010;100(3):435-445.
47. Braitstein P, Boulle A, Nash D, et al. Gender and the use of antiretroviral treatment in resource-constrained settings: findings from a multicenter collaboration. *Journal of women's health*. 2008;17(1):47-55.
48. Coursey K, Kalande P, Phiri K, Chamberlin S, Coates T, Dovel K. Developing intervention strategies to improve ART program initiation and retention among HIV-positive men in Malawi.
49. Kusemererwa S, Akena D, Nakanjako D, et al. Strategies for retention of heterosexual men in HIV care in sub-Saharan Africa: a systematic review. *PloS one*. 2021;16(2):e0246471.

## FIGURE LEGEND

Figure 1: Trial Design

Figure 2: Recruitment sources and ART disengagement criteria by recruitment type

## SUPPORTING INFORMATION

Supporting Information 1: Spirit Checklist

Supporting Information 2: Approved protocol

Supporting Information 3: In-depth interview guides

Figure 1: Trial Design





Fig 2. Recruitment sources and ART disengagement criteria by recruitment type

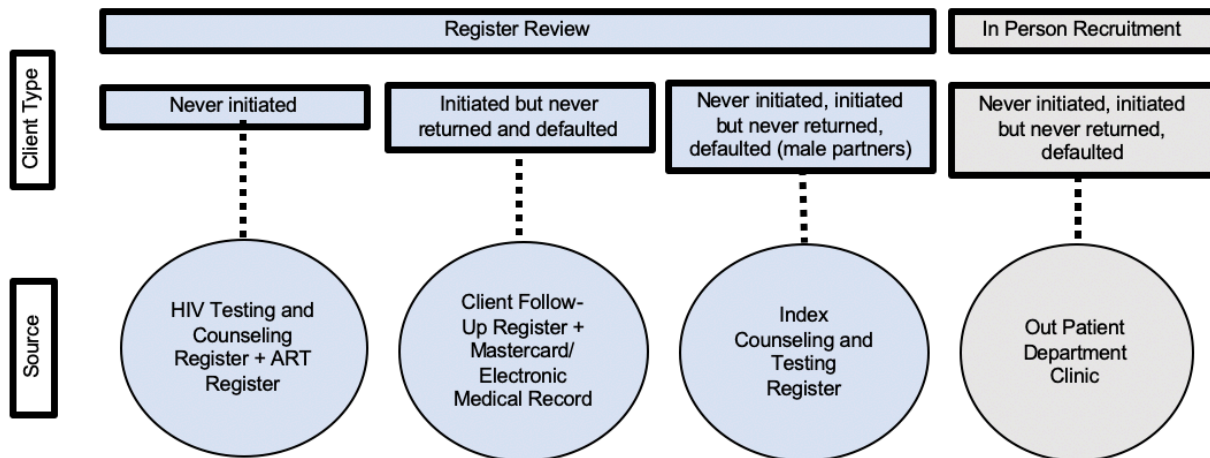

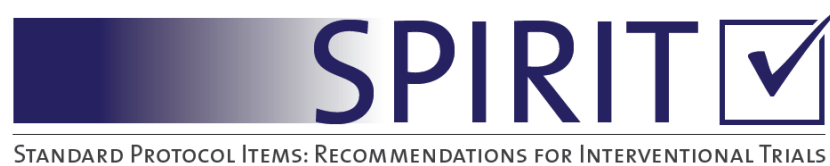

SPIRIT 2013 Checklist: Recommended items to address in a clinical trial protocol and related documents\*

| Section/item                      | Item No | Description                                                                                                                                                                                                                                                                              | Addressed on page number |
|-----------------------------------|---------|------------------------------------------------------------------------------------------------------------------------------------------------------------------------------------------------------------------------------------------------------------------------------------------|--------------------------|
| <b>Administrative information</b> |         |                                                                                                                                                                                                                                                                                          |                          |
| Title                             | 1       | Descriptive title identifying the study design, population, interventions, and, if applicable, trial acronym                                                                                                                                                                             | ___ 1 ___                |
| Trial registration                | 2a      | Trial identifier and registry name. If not yet registered, name of intended registry                                                                                                                                                                                                     | ___ 1, 15 ___            |
|                                   | 2b      | All items from the World Health Organization Trial Registration Data Set                                                                                                                                                                                                                 | ___ n/a ___              |
| Protocol version                  | 3       | Date and version identifier                                                                                                                                                                                                                                                              | ___ 2 ___                |
| Funding                           | 4       | Sources and types of financial, material, and other support                                                                                                                                                                                                                              | ___ 19 ___               |
| Roles and responsibilities        | 5a      | Names, affiliations, and roles of protocol contributors                                                                                                                                                                                                                                  | ___ 18-19 ___            |
|                                   | 5b      | Name and contact information for the trial sponsor                                                                                                                                                                                                                                       | ___ 19 ___               |
|                                   | 5c      | Role of study sponsor and funders, if any, in study design; collection, management, analysis, and interpretation of data; writing of the report; and the decision to submit the report for publication, including whether they will have ultimate authority over any of these activities | ___ 19 ___               |
|                                   | 5d      | Composition, roles, and responsibilities of the coordinating centre, steering committee, endpoint adjudication committee, data management team, and other individuals or groups overseeing the trial, if applicable (see Item 21a for data monitoring committee)                         | ___ n/a ___              |



|    |                                                           |     |                                                                                                               |                      |
|----|-----------------------------------------------------------|-----|---------------------------------------------------------------------------------------------------------------|----------------------|
| 1  | <b>Introduction</b>                                       |     |                                                                                                               |                      |
| 2  |                                                           |     |                                                                                                               |                      |
| 3  | Background and                                            | 6a  | Description of research question and justification for undertaking the trial, including summary of relevant   | ___ 4-5 ___          |
| 4  | rationale                                                 |     | studies (published and unpublished) examining benefits and harms for each intervention                        |                      |
| 5  |                                                           |     |                                                                                                               |                      |
| 6  |                                                           | 6b  | Explanation for choice of comparators                                                                         | ___ ___              |
| 7  |                                                           |     |                                                                                                               |                      |
| 8  | Objectives                                                | 7   | Specific objectives or hypotheses                                                                             | ___ 5 ___            |
| 9  |                                                           |     |                                                                                                               |                      |
| 10 | Trial design                                              | 8   | Description of trial design including type of trial (eg, parallel group, crossover, factorial, single group), |                      |
| 11 |                                                           |     | allocation ratio, and framework (eg, superiority, equivalence, noninferiority, exploratory)                   | ___ 5 ___            |
| 12 |                                                           |     |                                                                                                               |                      |
| 13 |                                                           |     |                                                                                                               |                      |
| 14 | <b>Methods: Participants, interventions, and outcomes</b> |     |                                                                                                               |                      |
| 15 |                                                           |     |                                                                                                               |                      |
| 16 | Study setting                                             | 9   | Description of study settings (eg, community clinic, academic hospital) and list of countries where data will | ___ 9-10 ___         |
| 17 |                                                           |     | be collected. Reference to where list of study sites can be obtained                                          |                      |
| 18 |                                                           |     |                                                                                                               |                      |
| 19 | Eligibility criteria                                      | 10  | Inclusion and exclusion criteria for participants. If applicable, eligibility criteria for study centres and  | ___ 10 ___           |
| 20 |                                                           |     | individuals who will perform the interventions (eg, surgeons, psychotherapists)                               |                      |
| 21 |                                                           |     |                                                                                                               |                      |
| 22 | Interventions                                             | 11a | Interventions for each group with sufficient detail to allow replication, including how and when they will be | ___ 6-9 ___          |
| 23 |                                                           |     | administered                                                                                                  |                      |
| 24 |                                                           |     |                                                                                                               |                      |
| 25 |                                                           | 11b | Criteria for discontinuing or modifying allocated interventions for a given trial participant (eg, drug dose  | ___ n/a ___          |
| 26 |                                                           |     | change in response to harms, participant request, or improving/worsening disease)                             |                      |
| 27 |                                                           |     |                                                                                                               |                      |
| 28 |                                                           | 11c | Strategies to improve adherence to intervention protocols, and any procedures for monitoring adherence        | ___ n/a ___          |
| 29 |                                                           |     | (eg, drug tablet return, laboratory tests)                                                                    |                      |
| 30 |                                                           |     |                                                                                                               |                      |
| 31 |                                                           | 11d | Relevant concomitant care and interventions that are permitted or prohibited during the trial                 | ___ n/a ___          |
| 32 |                                                           |     |                                                                                                               |                      |
| 33 | Outcomes                                                  | 12  | Primary, secondary, and other outcomes, including the specific measurement variable (eg, systolic blood       | ___ 10 ___           |
| 34 |                                                           |     | pressure), analysis metric (eg, change from baseline, final value, time to event), method of aggregation      |                      |
| 35 |                                                           |     | (eg, median, proportion), and time point for each outcome. Explanation of the clinical relevance of chosen    |                      |
| 36 |                                                           |     | efficacy and harm outcomes is strongly recommended                                                            |                      |
| 37 |                                                           |     |                                                                                                               |                      |
| 38 | Participant timeline                                      | 13  | Time schedule of enrolment, interventions (including any run-ins and washouts), assessments, and visits       | ___ 6,8-9, 11-12 ___ |
| 39 |                                                           |     | for participants. A schematic diagram is highly recommended (see Figure)                                      |                      |
| 40 |                                                           |     |                                                                                                               |                      |
| 41 |                                                           |     |                                                                                                               |                      |
| 42 |                                                           |     |                                                                                                               |                      |
| 43 |                                                           |     |                                                                                                               |                      |
| 44 |                                                           |     |                                                                                                               |                      |
| 45 |                                                           |     |                                                                                                               |                      |
| 46 |                                                           |     |                                                                                                               |                      |

|   |             |    |                                                                                                                                                                                       |               |
|---|-------------|----|---------------------------------------------------------------------------------------------------------------------------------------------------------------------------------------|---------------|
| 1 | Sample size | 14 | Estimated number of participants needed to achieve study objectives and how it was determined, including clinical and statistical assumptions supporting any sample size calculations | ___ 10-11 ___ |
| 2 |             |    |                                                                                                                                                                                       |               |
| 3 |             |    |                                                                                                                                                                                       |               |
| 4 | Recruitment | 15 | Strategies for achieving adequate participant enrolment to reach target sample size                                                                                                   | ___ 11-12 ___ |
| 5 |             |    |                                                                                                                                                                                       |               |

### 6 **Methods: Assignment of interventions (for controlled trials)**

#### 7 Allocation:

|    |                    |     |                                                                                                                                                                                                                                                                                                                                                          |             |
|----|--------------------|-----|----------------------------------------------------------------------------------------------------------------------------------------------------------------------------------------------------------------------------------------------------------------------------------------------------------------------------------------------------------|-------------|
| 8  |                    |     |                                                                                                                                                                                                                                                                                                                                                          |             |
| 9  |                    |     |                                                                                                                                                                                                                                                                                                                                                          |             |
| 10 | Sequence           | 16a | Method of generating the allocation sequence (eg, computer-generated random numbers), and list of any factors for stratification. To reduce predictability of a random sequence, details of any planned restriction (eg, blocking) should be provided in a separate document that is unavailable to those who enrol participants or assign interventions | ___ 5-6 ___ |
| 11 | generation         |     |                                                                                                                                                                                                                                                                                                                                                          |             |
| 12 |                    |     |                                                                                                                                                                                                                                                                                                                                                          |             |
| 13 |                    |     |                                                                                                                                                                                                                                                                                                                                                          |             |
| 14 |                    |     |                                                                                                                                                                                                                                                                                                                                                          |             |
| 15 |                    |     |                                                                                                                                                                                                                                                                                                                                                          |             |
| 16 | Allocation         | 16b | Mechanism of implementing the allocation sequence (eg, central telephone; sequentially numbered, opaque, sealed envelopes), describing any steps to conceal the sequence until interventions are assigned                                                                                                                                                | ___ 5-6 ___ |
| 17 | concealment        |     |                                                                                                                                                                                                                                                                                                                                                          |             |
| 18 | mechanism          |     |                                                                                                                                                                                                                                                                                                                                                          |             |
| 19 |                    |     |                                                                                                                                                                                                                                                                                                                                                          |             |
| 20 | Implementation     | 16c | Who will generate the allocation sequence, who will enrol participants, and who will assign participants to interventions                                                                                                                                                                                                                                | ___ 5 ___   |
| 21 |                    |     |                                                                                                                                                                                                                                                                                                                                                          |             |
| 22 |                    |     |                                                                                                                                                                                                                                                                                                                                                          |             |
| 23 |                    |     |                                                                                                                                                                                                                                                                                                                                                          |             |
| 24 | Blinding (masking) | 17a | Who will be blinded after assignment to interventions (eg, trial participants, care providers, outcome assessors, data analysts), and how                                                                                                                                                                                                                | ___ 6 ___   |
| 25 |                    |     |                                                                                                                                                                                                                                                                                                                                                          |             |
| 26 |                    |     |                                                                                                                                                                                                                                                                                                                                                          |             |
| 27 |                    | 17b | If blinded, circumstances under which unblinding is permissible, and procedure for revealing a participant's allocated intervention during the trial                                                                                                                                                                                                     | ___ n/a ___ |
| 28 |                    |     |                                                                                                                                                                                                                                                                                                                                                          |             |
| 29 |                    |     |                                                                                                                                                                                                                                                                                                                                                          |             |
| 30 |                    |     |                                                                                                                                                                                                                                                                                                                                                          |             |

### 31 **Methods: Data collection, management, and analysis**

|    |                 |     |                                                                                                                                                                                                                                                                                                                                                                                                              |            |
|----|-----------------|-----|--------------------------------------------------------------------------------------------------------------------------------------------------------------------------------------------------------------------------------------------------------------------------------------------------------------------------------------------------------------------------------------------------------------|------------|
| 32 |                 |     |                                                                                                                                                                                                                                                                                                                                                                                                              |            |
| 33 | Data collection | 18a | Plans for assessment and collection of outcome, baseline, and other trial data, including any related processes to promote data quality (eg, duplicate measurements, training of assessors) and a description of study instruments (eg, questionnaires, laboratory tests) along with their reliability and validity, if known. Reference to where data collection forms can be found, if not in the protocol | ___ 12 ___ |
| 34 | methods         |     |                                                                                                                                                                                                                                                                                                                                                                                                              |            |
| 35 |                 |     |                                                                                                                                                                                                                                                                                                                                                                                                              |            |
| 36 |                 |     |                                                                                                                                                                                                                                                                                                                                                                                                              |            |
| 37 |                 |     |                                                                                                                                                                                                                                                                                                                                                                                                              |            |
| 38 |                 | 18b | Plans to promote participant retention and complete follow-up, including list of any outcome data to be collected for participants who discontinue or deviate from intervention protocols                                                                                                                                                                                                                    | ___ 12 ___ |
| 39 |                 |     |                                                                                                                                                                                                                                                                                                                                                                                                              |            |
| 40 |                 |     |                                                                                                                                                                                                                                                                                                                                                                                                              |            |
| 41 |                 |     |                                                                                                                                                                                                                                                                                                                                                                                                              |            |
| 42 |                 |     |                                                                                                                                                                                                                                                                                                                                                                                                              |            |

|    |                                 |     |                                                                                                                                                                                                                                                                                                                                       |                   |
|----|---------------------------------|-----|---------------------------------------------------------------------------------------------------------------------------------------------------------------------------------------------------------------------------------------------------------------------------------------------------------------------------------------|-------------------|
| 1  | Data management                 | 19  | Plans for data entry, coding, security, and storage, including any related processes to promote data quality (eg, double data entry; range checks for data values). Reference to where details of data management procedures can be found, if not in the protocol                                                                     | _____ n/a _____   |
| 2  |                                 |     |                                                                                                                                                                                                                                                                                                                                       |                   |
| 3  |                                 |     |                                                                                                                                                                                                                                                                                                                                       |                   |
| 4  |                                 |     |                                                                                                                                                                                                                                                                                                                                       |                   |
| 5  | Statistical methods             | 20a | Statistical methods for analysing primary and secondary outcomes. Reference to where other details of the statistical analysis plan can be found, if not in the protocol                                                                                                                                                              | _____ 13-14 _____ |
| 6  |                                 |     |                                                                                                                                                                                                                                                                                                                                       |                   |
| 7  |                                 |     |                                                                                                                                                                                                                                                                                                                                       |                   |
| 8  |                                 | 20b | Methods for any additional analyses (eg, subgroup and adjusted analyses)                                                                                                                                                                                                                                                              | _____ 13-14 _____ |
| 9  |                                 |     |                                                                                                                                                                                                                                                                                                                                       |                   |
| 10 |                                 | 20c | Definition of analysis population relating to protocol non-adherence (eg, as randomised analysis), and any statistical methods to handle missing data (eg, multiple imputation)                                                                                                                                                       | _____ 13-14 _____ |
| 11 |                                 |     |                                                                                                                                                                                                                                                                                                                                       |                   |
| 12 |                                 |     |                                                                                                                                                                                                                                                                                                                                       |                   |
| 13 |                                 |     |                                                                                                                                                                                                                                                                                                                                       |                   |
| 14 | <b>Methods: Monitoring</b>      |     |                                                                                                                                                                                                                                                                                                                                       |                   |
| 15 |                                 |     |                                                                                                                                                                                                                                                                                                                                       |                   |
| 16 | Data monitoring                 | 21a | Composition of data monitoring committee (DMC); summary of its role and reporting structure; statement of whether it is independent from the sponsor and competing interests; and reference to where further details about its charter can be found, if not in the protocol. Alternatively, an explanation of why a DMC is not needed | _____ n/a _____   |
| 17 |                                 |     |                                                                                                                                                                                                                                                                                                                                       |                   |
| 18 |                                 |     |                                                                                                                                                                                                                                                                                                                                       |                   |
| 19 |                                 |     |                                                                                                                                                                                                                                                                                                                                       |                   |
| 20 |                                 |     |                                                                                                                                                                                                                                                                                                                                       |                   |
| 21 |                                 |     |                                                                                                                                                                                                                                                                                                                                       |                   |
| 22 |                                 | 21b | Description of any interim analyses and stopping guidelines, including who will have access to these interim results and make the final decision to terminate the trial                                                                                                                                                               | _____ n/a _____   |
| 23 |                                 |     |                                                                                                                                                                                                                                                                                                                                       |                   |
| 24 |                                 |     |                                                                                                                                                                                                                                                                                                                                       |                   |
| 25 | Harms                           | 22  | Plans for collecting, assessing, reporting, and managing solicited and spontaneously reported adverse events and other unintended effects of trial interventions or trial conduct                                                                                                                                                     | _____ 12 _____    |
| 26 |                                 |     |                                                                                                                                                                                                                                                                                                                                       |                   |
| 27 |                                 |     |                                                                                                                                                                                                                                                                                                                                       |                   |
| 28 | Auditing                        | 23  | Frequency and procedures for auditing trial conduct, if any, and whether the process will be independent from investigators and the sponsor                                                                                                                                                                                           | _____ n/a _____   |
| 29 |                                 |     |                                                                                                                                                                                                                                                                                                                                       |                   |
| 30 |                                 |     |                                                                                                                                                                                                                                                                                                                                       |                   |
| 31 |                                 |     |                                                                                                                                                                                                                                                                                                                                       |                   |
| 32 | <b>Ethics and dissemination</b> |     |                                                                                                                                                                                                                                                                                                                                       |                   |
| 33 |                                 |     |                                                                                                                                                                                                                                                                                                                                       |                   |
| 34 | Research ethics approval        | 24  | Plans for seeking research ethics committee/institutional review board (REC/IRB) approval                                                                                                                                                                                                                                             | _____ 15 _____    |
| 35 |                                 |     |                                                                                                                                                                                                                                                                                                                                       | _____             |
| 36 |                                 |     |                                                                                                                                                                                                                                                                                                                                       |                   |
| 37 | Protocol amendments             | 25  | Plans for communicating important protocol modifications (eg, changes to eligibility criteria, outcomes, analyses) to relevant parties (eg, investigators, REC/IRBs, trial participants, trial registries, journals, regulators)                                                                                                      | _____ n/a _____   |
| 38 |                                 |     |                                                                                                                                                                                                                                                                                                                                       |                   |
| 39 |                                 |     |                                                                                                                                                                                                                                                                                                                                       |                   |
| 40 |                                 |     |                                                                                                                                                                                                                                                                                                                                       |                   |
| 41 |                                 |     |                                                                                                                                                                                                                                                                                                                                       |                   |
| 42 |                                 |     |                                                                                                                                                                                                                                                                                                                                       |                   |
| 43 |                                 |     |                                                                                                                                                                                                                                                                                                                                       |                   |
| 44 |                                 |     |                                                                                                                                                                                                                                                                                                                                       |                   |
| 45 |                                 |     |                                                                                                                                                                                                                                                                                                                                       |                   |
| 46 |                                 |     |                                                                                                                                                                                                                                                                                                                                       |                   |

|    |                               |     |                                                                                                                                                                                                                                                                                     |      |
|----|-------------------------------|-----|-------------------------------------------------------------------------------------------------------------------------------------------------------------------------------------------------------------------------------------------------------------------------------------|------|
| 1  | Consent or assent             | 26a | Who will obtain informed consent or assent from potential trial participants or authorised surrogates, and how (see Item 32)                                                                                                                                                        | 12   |
| 2  |                               |     |                                                                                                                                                                                                                                                                                     |      |
| 3  |                               |     |                                                                                                                                                                                                                                                                                     |      |
| 4  |                               | 26b | Additional consent provisions for collection and use of participant data and biological specimens in ancillary studies, if applicable                                                                                                                                               | n/a  |
| 5  |                               |     |                                                                                                                                                                                                                                                                                     |      |
| 6  |                               |     |                                                                                                                                                                                                                                                                                     |      |
| 7  | Confidentiality               | 27  | How personal information about potential and enrolled participants will be collected, shared, and maintained in order to protect confidentiality before, during, and after the trial                                                                                                | 5    |
| 8  |                               |     |                                                                                                                                                                                                                                                                                     |      |
| 9  |                               |     |                                                                                                                                                                                                                                                                                     |      |
| 10 | Declaration of interests      | 28  | Financial and other competing interests for principal investigators for the overall trial and each study site                                                                                                                                                                       | 19   |
| 11 |                               |     |                                                                                                                                                                                                                                                                                     |      |
| 12 |                               |     |                                                                                                                                                                                                                                                                                     |      |
| 13 | Access to data                | 29  | Statement of who will have access to the final trial dataset, and disclosure of contractual agreements that limit such access for investigators                                                                                                                                     | n/a  |
| 14 |                               |     |                                                                                                                                                                                                                                                                                     |      |
| 15 |                               |     |                                                                                                                                                                                                                                                                                     |      |
| 16 | Ancillary and post-trial care | 30  | Provisions, if any, for ancillary and post-trial care, and for compensation to those who suffer harm from trial participation                                                                                                                                                       | n/a  |
| 17 |                               |     |                                                                                                                                                                                                                                                                                     |      |
| 18 |                               |     |                                                                                                                                                                                                                                                                                     |      |
| 19 |                               |     |                                                                                                                                                                                                                                                                                     |      |
| 20 | Dissemination policy          | 31a | Plans for investigators and sponsor to communicate trial results to participants, healthcare professionals, the public, and other relevant groups (eg, via publication, reporting in results databases, or other data sharing arrangements), including any publication restrictions | 2,15 |
| 21 |                               |     |                                                                                                                                                                                                                                                                                     |      |
| 22 |                               |     |                                                                                                                                                                                                                                                                                     |      |
| 23 |                               |     |                                                                                                                                                                                                                                                                                     |      |
| 24 |                               | 31b | Authorship eligibility guidelines and any intended use of professional writers                                                                                                                                                                                                      | n/a  |
| 25 |                               |     |                                                                                                                                                                                                                                                                                     |      |
| 26 |                               | 31c | Plans, if any, for granting public access to the full protocol, participant-level dataset, and statistical code                                                                                                                                                                     | n/a  |
| 27 |                               |     |                                                                                                                                                                                                                                                                                     |      |
| 28 |                               |     |                                                                                                                                                                                                                                                                                     |      |
| 29 | <b>Appendices</b>             |     |                                                                                                                                                                                                                                                                                     |      |
| 30 |                               |     |                                                                                                                                                                                                                                                                                     |      |
| 31 | Informed consent materials    | 32  | Model consent form and other related documentation given to participants and authorised surrogates                                                                                                                                                                                  | n/a  |
| 32 |                               |     |                                                                                                                                                                                                                                                                                     |      |
| 33 |                               |     |                                                                                                                                                                                                                                                                                     |      |
| 34 | Biological specimens          | 33  | Plans for collection, laboratory evaluation, and storage of biological specimens for genetic or molecular analysis in the current trial and for future use in ancillary studies, if applicable                                                                                      | n/a  |
| 35 |                               |     |                                                                                                                                                                                                                                                                                     |      |
| 36 |                               |     |                                                                                                                                                                                                                                                                                     |      |

\*It is strongly recommended that this checklist be read in conjunction with the SPIRIT 2013 Explanation & Elaboration for important clarification on the items. Amendments to the protocol should be tracked and dated. The SPIRIT checklist is copyrighted by the SPIRIT Group under the Creative Commons [“Attribution-NonCommercial-NoDerivs 3.0 Unported”](https://creativecommons.org/licenses/by-nc-nd/3.0/) license.

1  
2  
3  
4  
5  
6  
7  
8  
9  
10  
11  
12  
13  
14  
15  
16  
17  
18  
19  
20  
21  
22  
23  
24  
25  
26  
27  
28  
29  
30  
31  
32  
33  
34  
35  
36  
37  
38  
39  
40  
41  
42  
43  
44  
45  
46  
47  
48  
49  
50  
51  
52  
53  
54  
55  
56  
57  
58  
59  
60

Partners in Hope Medical Center

# Identifying efficient linkage strategies for HIV self-testing (IDEaL)

Kathryn Dovel, Principle Investigator  
Partners in Hope  
PO Box 302  
3-6-2019

## ABSTRACT

**Background:** HIV self-testing (HIVST) has been found to be a highly acceptable approach for men to learn of their HIV status and has resulted in increased testing uptake (Dovel 2019, cite Augustines stuff). However, rates of antiretroviral therapy (ART) initiation among those tested with HIVST are difficult to capture and some studies have suggested that linkage rates are low (Ortblad 2017, MacPherson 2014), particularly amongst men. We propose a clinical trial to test varying approaches to ART initiation among men who test HIV-positive through HIVST. We will test three interventions:

*Lightest Touch Intervention (Arm 1):* simple reminders to visit the health facility (given every two weeks);

*Staged Intervention (Arm 2):* a staged intervention that consecutively increases in intensity every month that a participant does not initiate ART (intervals include reminders, motivational interviewing, and home-based ART initiation);

*Intensive Intervention (Arm 3):* home-based ART initiation followed by linkage to the health facility of their choice the following month.

**Objective:** Our primary objective is to identify a cost-effective package for ART initiation among men identified as HIV-positive through HIVST in Malawi. Our specific objectives are:

Objective 1. Evaluate the effectiveness of the Staged ART Intervention vs Lightest Touch Intervention (primary analysis) and the effectiveness of the Staged ART Intervention vs Intensive Intervention (secondary analysis) on ART initiation within 4-months after enrolment in the trial.

Objective 2. Identify individual-, community-, and facility-level factors associated with ART initiation within each intervention arm (Lightest Touch; Staged; and Intensive Interventions).

Objective 3. Determine the cost and scalability of each intervention (Lightest Touch; Staged; and Intensive Interventions).

**Methods:** We will perform an individually randomized control trial with 543 HIV-positive men identified through HIVST and their female partners. Men will be individually randomized 1:1:1 to one of the three intervention arms described above. The study will be performed at 10 health facilities supported by Partners in Hope (PIH). Data collection will include baseline and follow-up surveys and interviews with men and women; medical chart reviews at four-months after study enrollment; qualitative interviews; and a cost analysis of costs associated with each arm. Participants will be enrolled in the study for a total of 4 months with approximately 2 or 3 study visits throughout that period.

**Anticipated results:** We anticipate learning about the most effective strategy to engage men in ART. We also anticipate learning about the type and degree of followup necessary to support men's engagement in ART services. Finally, we anticipate learning about the cost-effectiveness of intervention, with the goal of improving cost-effectiveness for the Ministry of Health. Results from this study could be used to define best practices and to further scale ART-focused programs for men in Malawi.

## TABLE OF CONTENTS

|                                                          |           |
|----------------------------------------------------------|-----------|
| <b>1. INTRODUCTION</b> .....                             | <b>4</b>  |
| 1.1. <i>Background</i> .....                             | 4         |
| 1.2. <i>Problem statement</i> .....                      | 4         |
| 1.3. <i>Justification</i> .....                          | 4         |
| <b>2. OBJECTIVES</b> .....                               | <b>4</b>  |
| 2.1. <i>Primary objective</i> .....                      | 4         |
| 2.2. <i>Secondary objectives</i> .....                   | 4         |
| <b>3. LITERATURE REVIEW</b> .....                        | <b>5</b>  |
| <b>4. METHODOLOGY</b> .....                              | <b>8</b>  |
| 4.1. <i>Intervention description</i> .....               | 9         |
| 4.2. <i>Place of study</i> .....                         | 11        |
| 4.3. <i>OBJECTIVE 1</i> .....                            | 12        |
| 4.3.1. <i>Study design</i> .....                         | 12        |
| 4.3.2. <i>Target population</i> .....                    | 12        |
| 4.3.3. <i>Sampling techniques and enrollment</i> .....   | 13        |
| 4.3.4. <i>Study Activities</i> .....                     | 13        |
| 4.3.5. <i>Data collection techniques and tools</i> ..... | 15        |
| 4.3.6. <i>Sample size determination</i> .....            | 17        |
| 4.3.7. <i>Data analysis</i> .....                        | 17        |
| 4.4. <i>OBJECTIVE 2</i> .....                            | 17        |
| 4.4.1. <i>Study design</i> .....                         | 17        |
| 4.4.2. <i>Target population</i> .....                    | 17        |
| 4.4.3. <i>Sampling techniques and tools</i> .....        | 18        |
| 4.4.4. <i>Data collection techniques and tools</i> ..... | 18        |
| 4.4.5. <i>Sample size determination</i> .....            | 19        |
| 4.4.6. <i>Data analysis</i> .....                        | 19        |
| 4.5. <i>OBJECTIVE 3</i> .....                            | 20        |
| 4.5.1. <i>Study design</i> .....                         | 20        |
| 4.5.2. <i>Data collection techniques and tools</i> ..... | 20        |
| 4.5.3. <i>Data analysis</i> .....                        | 20        |
| <b>5. ETHICAL CONSIDERATIONS</b> .....                   | <b>21</b> |
| <b>6. DISSMINATION OF RESULTS</b> .....                  | <b>22</b> |
| <b>7. PERSONNEL ROLES AND INSTITUTIONS</b> .....         | <b>23</b> |
| <b>8. REGULATORY OVERSIGHT</b> .....                     | <b>24</b> |
| <b>9. STUDY IMPLEMENTATION</b> .....                     | <b>24</b> |
| <b>10. PROTOCOL DEVIATION REPORTING</b> .....            | <b>25</b> |
| <b>11. WORK PLAN TIMELINE</b> .....                      | <b>25</b> |
| <b>12. BUDGET AND JUSTIFICATION</b> .....                | <b>25</b> |
| <b>13. REFERENCES</b> .....                              | <b>27</b> |
| <b>14. APPENDIX</b> .....                                | <b>30</b> |
| 14.1. <i>APPENDIX A – Study Invitation Cards</i> .....   | 30        |

|    |        |                                                                |
|----|--------|----------------------------------------------------------------|
| 1  |        |                                                                |
| 2  |        |                                                                |
| 3  | 14.2.  | <i>APPENDIX B – Recruitment and Screening Script</i> ..... 32  |
| 4  | 14.3.  | <i>APPENDIX C – Written Informed Consent- Female</i> ..... 36  |
| 5  | 14.4.  | <i>APPENDIX D: Written Informed Consent – Male</i> ..... 46    |
| 6  | 14.5.  | <i>APPENDIX E: Baseline Survey – Male</i> ..... 55             |
| 7  | 14.6.  | <i>APPENDIX F: Baseline survey – Female</i> ..... 100          |
| 8  | 14.7.  | <i>APPENDIX G: Follow-up Survey - Male</i> ..... 129           |
| 9  | 14.8.  | <i>APPENDIX H: Follow-up Survey – Female</i> ..... 137         |
| 10 | 14.9.  | <i>APPENDIX I: Data Extraction Tool</i> ..... 144              |
| 11 | 14.10. | <i>APPENDIX J: In-Depth Interview Guide – Female</i> ..... 147 |
| 12 | 14.11. | <i>APPENDIX K: In-Depth Interview Guide – Male</i> ..... 155   |
| 13 | 14.12. | <i>APPENDIX L: Personel CV’s</i> ..... 165                     |
| 14 |        |                                                                |
| 15 |        |                                                                |
| 16 |        |                                                                |
| 17 |        |                                                                |
| 18 |        |                                                                |
| 19 |        |                                                                |
| 20 |        |                                                                |
| 21 |        |                                                                |
| 22 |        |                                                                |
| 23 |        |                                                                |
| 24 |        |                                                                |
| 25 |        |                                                                |
| 26 |        |                                                                |
| 27 |        |                                                                |
| 28 |        |                                                                |
| 29 |        |                                                                |
| 30 |        |                                                                |
| 31 |        |                                                                |
| 32 |        |                                                                |
| 33 |        |                                                                |
| 34 |        |                                                                |
| 35 |        |                                                                |
| 36 |        |                                                                |
| 37 |        |                                                                |
| 38 |        |                                                                |
| 39 |        |                                                                |
| 40 |        |                                                                |
| 41 |        |                                                                |
| 42 |        |                                                                |
| 43 |        |                                                                |
| 44 |        |                                                                |
| 45 |        |                                                                |
| 46 |        |                                                                |
| 47 |        |                                                                |
| 48 |        |                                                                |
| 49 |        |                                                                |
| 50 |        |                                                                |
| 51 |        |                                                                |
| 52 |        |                                                                |
| 53 |        |                                                                |
| 54 |        |                                                                |
| 55 |        |                                                                |
| 56 |        |                                                                |
| 57 |        |                                                                |
| 58 |        |                                                                |
| 59 |        |                                                                |
| 60 |        |                                                                |



## 1. INTRODUCTION

### 1.1. Background

HIV self-testing (HIVST) is an effective strategy to improve HIV testing coverage, especially among hard-to-reach populations such as men and youth. Index testing, whereby a HIV positive client gives an HIVST kit to their sexual partner to use at home, is considered beneficial for its ability to maintain a testers privacy. The method is now recommended by the World Health Organization (WHO) and is being adopted as policy throughout sub-Saharan Africa (SSA). However, uptake of antiretroviral therapy (ART) and adherence after utilizing HIVST remains sub-optimal among certain population, specifically men. Innovative ART initiation and early retention strategies are urgently needed for Index HIVST to be successful.

### 1.2. Problem statement

We must better understand how to engage men in HIV care. Specifically, there is limited literature on feasible differentiated models to support men to start and stay on treatment that can be taken to scale. Further, there is increased recognition that individuals are at greatest risk of loss-to-follow-up during transition periods across the cascade (i.e. when starting ART). ART initiation and early retention must be improved if HIVST is to become a viable option for high-risk groups in SSA. To address this gap, we propose to conduct a study to test and evaluate varying strategies for ART initiation and retention amongst men.

### 1.3. Justification

This study will combine HIVST with a second-level intervention focused on ART initiation to address the urgent gap in ART initiation and early retention among HIVST users. Additionally, Objective 3 will allow us to develop the lowest cost intervention package while reaching the highest number of male partners.

## 2. OBJECTIVES

### 2.1. Primary objective

*Objective 1.* Test the impact of a staged ART intervention vs simple reminders and the effectiveness of a staged ART intervention vs home-based ART on ART initiation within 3-months of an HIV-positive diagnosis

### 2.2. Secondary objectives

*Objective 2.* Identify individual-, community-, and facility-level factors associated with ART initiation within each intervention.

*Objective 3.* Determine the cost and scalability of each intervention.

### 3. LITERATURE REVIEW

#### Background

Men in sub-Saharan Africa are less likely than women to use HIV services.<sup>1</sup> Men's absence from care is concerning not only for their own health, but also for the health of girls and young women who continue to be infected at unacceptably high rates.<sup>2</sup> HIV prevention and treatment programs have not traditionally been directed at men. Men are notably absent from international guidelines, national policies, and local HIV interventions. Research shows that women are 322% more likely to be mentioned in international HIV guidelines than men.<sup>3</sup> In the context of Malawi, national guidelines expect women of reproductive age to attend a health facility 5-17 times per year (equivalent to 19-63 hours)<sup>4</sup>, and 180-472 times in their reproductive lifespan (15-44 years). There are no such expectations for men (see Table 1). The justification for the global attention of HIV program thus far on women and girls is without dispute. Gender inequality is a key driver which impacts women's health and access to HIV services and creates specific vulnerabilities for women to HIV infection.<sup>5</sup> However, framing HIV as a woman's concern means we have failed to understand how gender affects and drives the burden of ill health for men, and inadvertently perpetuates the epidemic for young women and girls. Targeted strategies specific to men are urgently needed if we are to engage them in care.

**Table 1: Malawi ministry of health recommended health services and estimated visits required across the reproductive life span (15-44 years)**

| Service         | Frequency | Target Population | Estimated number of visits between 15-44 years |                                         |                                |           |
|-----------------|-----------|-------------------|------------------------------------------------|-----------------------------------------|--------------------------------|-----------|
|                 |           |                   | Women: 5-year FP (Implant; 9%*)                | Women: quarterly FG (injectables; 23%*) | Women: monthly FP (pills, 2%*) | Men       |
| ANC             | 17.6      | Women             | 18                                             | 18                                      | 18                             | -         |
| Delivery        | 4.4       | Women             | 4                                              | 4                                       | 4                              | -         |
| Post-natal      | 4.4       | Women             | 4                                              | 4                                       | 4                              | -         |
| Family Planning | 88        | Women             | 7                                              | 88                                      | 264                            | -         |
| Under five      | 120       | Women             | 120                                            | 120                                     | 120                            | -         |
| HIV testing     | 22.6      | Women and men     | 23                                             | 23                                      | 23                             | 29        |
| Circumcision    | 3         | Men               | -                                              | -                                       | -                              | 3         |
| <b>Total</b>    |           |                   | <b>176</b>                                     | <b>257</b>                              | <b>433</b>                     | <b>32</b> |

Male partners of women who are already identified as HIV-positive (index partners) are still a major concern for epidemic control due to high rates of multiple and concurrent partnerships among men<sup>6</sup> and the fact that index male partners have two times the risk of being HIV-positive as compared to the general male population.<sup>7</sup> Data from a recent HIVST study show that there is a high need for index testing among men in Malawi: across 3 high-burden district hospitals in Malawi, men represented 73% of all index partners in need of testing. Among those who did test, male partners were 4 times more likely to test HIV-positive than female partners (23% versus 3%), representing urgent unmet need among men.<sup>8</sup>

A recent Index HIV Trial in Malawi found that HIV testing among men increased dramatically when HIV-positive clients give HIVST kits to their sexual partners to use at home.<sup>9</sup> The study found that 66% of male partners in the HIVST arm tested for HIV compared to only 22% of men in the standard partner referral slip arm. Within the HIVST arm, men who tested for HIV had an HIV-positivity rate of 23%, with no adverse events reported (see Fig 1).<sup>2</sup> Index HIVST is highly acceptable and allows men to test at times and locations convenient for them, with complete privacy in their own homes.<sup>10,11</sup>

However, innovative ART initiation and early retention strategies are urgently needed for Index HIVST

to be successful. The aforementioned study showed that ART initiation was unacceptably low, with only 22% of HIV-positive men in the HIVST arm initiating ART at 6-months versus 75% of men in standard partner referral slip arm).<sup>3</sup> (See Figure 1). Poor rates of ART initiation are commonly reported across most HIVST studies, with ART initiation rates ~20-45%<sup>7,12-14</sup>, although ART initiation is notoriously difficult to measure within HIVST strategies. A cost analysis for national scale-up of Index HIVST in Malawi showed that 76% of men tested must initiate ART for Index HIVST to be cost-neutral at the national level as compared to using partner referral slips.

**Figure 1:** Male partner use of HIV services Index HIVST vs. referral slips (n=285) from HIVST trial (PI: Dovel)



Two overarching barriers keep HIV-positive men from accessing ART services: (1) lack of male-friendly services,<sup>15-17</sup> and (2) harmful gender norms.<sup>18-20</sup> Male friendly services are private and convenient (requiring minimal time), and offered by health workers who understand the unique needs of men.<sup>21</sup> In addition, men are often unfamiliar with the health system, and are unsure how to navigate facility-based services. Gender norms that prioritize men as strong and self-reliant perpetuate fear of unwanted disclosure and stigma, and discourage men's engagement in ART.<sup>18,21</sup> Our research in Malawi found similar barriers to ART initiation for men who tested HIV-positive: men avoided ART services due to (1) fear of unwanted disclosure and stigma due to lack of privacy; (2) time/cost required to access care; (3) poor knowledge about the benefits of early ART initiation; and (4) beliefs that require men be strong, in control, and focused on short-term benefits such as daily financial earnings and respect from their male friends. Index HIVST must be combined with innovative ART interventions that address these barriers.

### **Evidence based for interventions that increase ART initiation**

We have conducted a thorough search of the literature and have identified several intervention strategies that may increase ART initiation among men who use HIVST: (1) reminders + peer navigation; (2) motivational interviewing; and (3) home-based ART.

*Reminders + Peer Navigation* is shown to help clients overcome fears about facility-based services and

1  
2  
3 provide peer modeling how to live successfully with HIV.<sup>22</sup> While the strategy has been primarily tested  
4 within traditional HIV testing strategies, we hypothesize that the same mechanisms will work for men  
5 who test through Index HIVST. Reminders are usually done over the phone via phone calls or SMS and  
6 can vary in frequency based on the health care workers disgression. Peer Navigation is assisted guidance  
7 to the health clinic as well as overviews of where to go/what to do when at the facility once there to  
8 ensure men feel more comfortable in the clinic environment.  
9

10 *Motivational Interviewing* is becoming widely recognized as a key strategy to help clients navigate  
11 barriers to the desired outcome by building client's self-efficacy, identifying internal motivation for the  
12 desired behavior, and establishing strategies and short- and long-term goals needed to reach a desired  
13 outcome.<sup>8,23</sup> Motivational interviewing is seen as particularly effective when clients need to make difficult  
14 decisions and overcome multi-level barriers to behavior change.<sup>24,25</sup> The strategy has been used to  
15 improve ART adherence<sup>8,25</sup> and reduce sexual risk behavior.<sup>15</sup>  
16

17 In contrast, traditional counselling efforts are largely informational and directive, whereby health care  
18 workers deliver a pre-determined counseling package that is not responsive to a client's individual  
19 situation.<sup>16,17</sup> Such methods have been proven largely ineffective,<sup>18</sup> particularly with hard-to-reach  
20 populations such as men.<sup>19</sup> Motivational interviewing differs from traditional strategies by adopting a  
21 client-centered approach is based on collaboration, evocation and respect for autonomy. We hypothesize  
22 that these counseling techniques will encourage HIV status acceptance and disclosure, promote health  
23 seeking behavior, provide coping strategies men need to overcome barriers related to facility-based care,  
24 and ultimately, facilitate ART initiation.  
25

26 Furthermore, motivational interviewing and client-centered care should resonate with and address the  
27 needs of men. Partners in Hope Malawi conducted 25 interviews with men and 6 focus group discussions  
28 with health care workers and female partners (n=42) to assess what health services men desired.  
29 Overwhelmingly, men reported wanting increased counseling on sexual health (including HIV) and  
30 marital concerns. Exit surveys with male ART clients (n=180) show that only 38% of men were aware of  
31 Treatment as Prevention and 65% aware of the benefits of early ART initiation, highlighting major  
32 knowledge gaps that may influence engagement in care. Motivational interviewing and client-centered  
33 counseling will be able to address both gaps in ART treatment and sexual health knowledge.  
34

35 *Home-based ART initiation* has improved ART initiation across the region. A systematic review found  
36 that home-based ART is associated with ART retention, decreased mortality,<sup>26</sup> and in some cases, reduced  
37 stigma and increased privacy.<sup>27,28</sup> We conducted one of the only studies to examine home-based ART  
38 initiation within a community HIVST distribution strategy (Co-I: Choko). We found that home-based  
39 ART initiation alongside home-based HIVST significantly increased ART initiation as compared to  
40 standard facility-based initiation (RR 2.94; p-value<0.001).<sup>13</sup>  
41

42 Home-based ART may be particularly attractive to hard-to-reach men because it reduces client time  
43 required to access services and provides an easy, opt-out entry point for men who otherwise may have  
44 never engaged with the health care system, or know how to navigate complicated, busy health facilities.  
45 Home-based ART has been associated with a three-fold reduction in financial costs to clients.<sup>29</sup> Further,  
46 home-based ART facilitates client-centered, one-on-one care that is often not feasible in busy clinic  
47 settings.  
48

49 The Malawi Ministry of Health is in the process of rolling out community-based ART distribution  
50 strategies, and may consider home-based ART initiation for hard-to-reach populations. However, home-  
51 based ART is considered a resource intensive strategy, and therefore should (1) only be offered to the  
52 hardest-to-reach populations, and (2) requires that clients who initiate ART at home-based eventually link  
53 into facility-based care. Additionally, findings from a recent Index HIVST Trial show that home-based  
54 services for men is acceptable to female ART clients in the Malawian context, with minimal risk of  
55 adverse events. Over 90% of female ART clients had disclosed their HIV-status to their partner and were  
56 willing to have their male partners traced in their homes for additional services.  
57  
58  
59  
60

Finally, increased privacy and decreased wait-times are essential if men are to engage in HIV services. As part of a study on new Universal Treatment policies in Malawi, 15 in-depth interviews and 208 surveys were conducted with newly diagnosed HIV-positive men. Fear of unwanted disclosure due to limited privacy and a lack of trust in the health facility were the primary barriers to men's ART initiation. Home-based ART initiation can help address these barriers for ART initiation, and motivational interviewing can help provide men the skills needed to navigate these barriers within the health system in order to promote ART retention. Further, the vast majority (>95%) of men who used HIVST in the Index HIVST trial disclosed their HIV status to their female partner<sup>8</sup>, meaning that home visits (i.e., reminders, peer navigation, motivational interviewing, or home-based ART) will not increase risk of unwanted disclosure to one's sexual partner. Table 2 below outlines how the proposed interventions will address barriers to ART initiation identified in the literature.

**Table 2.** Levels and specific barriers to men's ART initiation, and intervention components

| Barriers to ART Initiation                                 | Intervention Components       | Level of Intervention |
|------------------------------------------------------------|-------------------------------|-----------------------|
| Unfamiliar with health system                              | Reminders and Peer Navigation | Health System         |
| Belief about gender norms and focus on short-term benefits | Motivational Interviewing     | Community/Individual  |
| Poor knowledge                                             |                               |                       |
| Time/cost requirements                                     | Home-Based ART Initiation     | Health System         |
| Lack of privacy/fear of disclosure                         |                               |                       |
| Unfamiliar with health system                              |                               |                       |

#### 4. METHODOLOGY

This study will be an individually randomized trial comparing three different strategies to improve ART initiation and early retention among men who test HIV-positive with HIVST. Study staff will utilize the Ministry of Health Index Testing Register and trace HIV positive women and their male partners to be screened and enrolled if they meet the inclusion criteria. Enrolled men will be randomized to one of three arms and will receive follow up and varying degrees of support based on the arm assigned. Outcomes will be assessed after 90 days after enrollment. Survey data, qualitative data, medical chart data (Objectives 1 and 2) and costing data (Objective 3) will be collected over years 1-3. A study flow chart is illustrated below (Figure 2).

Figure 2: Study flow chart



4.1. Intervention description

Each arm will offer an intervention immediately after study enrollment (that same day; day 0). Follow-up interventions will be offered every 14 days after that until 76 days or ART initiation is reached, whichever comes first.

Description of study arms:

**Arm 1: “Lightest Touch” Intervention**, whereby facility staff provide reminders and peer navigation (SMS and home visits) for men to encourage enrolment in facility-based ART programs. One reminder on the day of enrollment and every 14 days thereafter, until 76 days or ART initiation, whichever comes first. If initiation is not reached at 90 days, the patient will be classified as not initiated for study purposes. See Arm 1 diagram below:

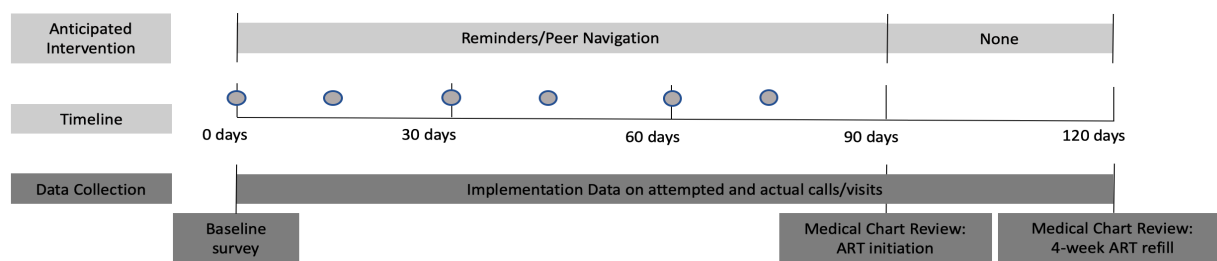

Fig 2. Timing of interventions to be offered in Aim 1

Legend:

● Approximate time the intervention will be offered (approximately every 2 weeks until 76 days, or until ART initiation, whichever comes first)

**Arm 2: “Staged” Intervention**, whereby the intervention will build in intensity each month for those



who have not initiated ART in the previous month, or for a maximum of 3 months, whichever comes first. The following intervention components that will be added each month (incrementally) until the first ART distribution is completed:

- Day 0-29: Reminders and, for those who agree to initiate, peer navigation;
- Day 30-59: Motivational interviewing and, for those who agree to initiate, peer navigation;
- Day 60-79: Motivational interviewing + home-based ART initiation and, for those who initiate, reminders and peer navigation for the facility-based 4-week ART refill appointment).

See Arm 2 diagram below:

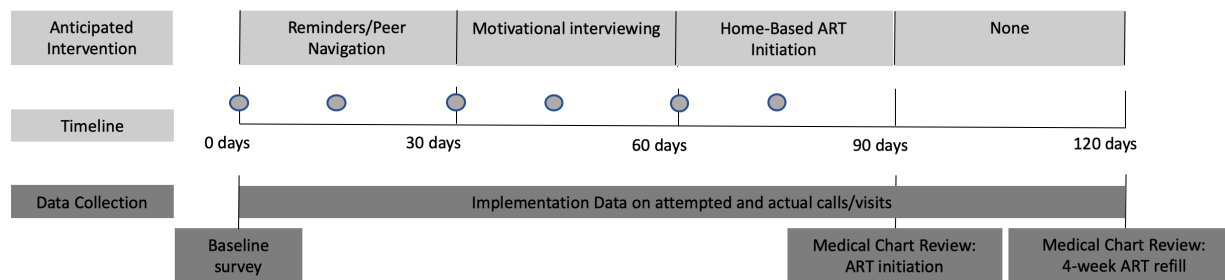

Fig 3. Timing of interventions to be offered in Aim 2

**Legend:**

- Approximate time the intervention will be offered (approximately every 2 weeks until 76 days, or until ART initiation, whichever comes first)

**Arm 3: “Intensive” Intervention**, whereby the most resource intensive intervention is offered immediately to all HIV-positive male partners. See Fig 4 for timeline. Components include:

- Motivational interviewing
- Home-based ART initiation
- 4-weeks after ART initiation: Reminders and peer navigation to facility for 4-week ART refill appointment

Home-based ART initiation will be scheduled at times convenient for men, including evening and weekend hours. Men who prefer to initiate in another private location in the community (besides their home) will be able to do so. The first home-visit will be conducted by a trained nurse and will include confirmatory HIV testing using Ministry of Health standard algorithm (Determine + Unigold), pre-ART counseling and motivational interviewing, a basic health evaluation, and ART initiation with a 30-day supply of first-line ART in Malawi – dolutegravir, tenofovir, and lamivudine as a single tablet. Clients will also be given a 30-day supply of cotrimoxazole, which is standard of care for all HIV-positive individuals.

Prior to ART initiation, a basic health evaluation will be performed by the nurse, including screening for tuberculosis with routine questions.<sup>66</sup> Any individual identified by the study nurse with concerns for an active opportunistic infection or other health problem(s) that could complicate home-based ART will be immediately referred and escorted to the facility.

At the same visit, motivational interviewing will be performed in preparation for men to engage in facility-based ART services. This includes counseling on the benefits of early ART, strategies for disclosure and positive living, strategies to overcome facility-based barriers to ART services, and addressing harmful gender norms that may discourage men from using care. Counseling will be adaptive to the needs and concerns of male clients. At 4-weeks after ART initiation, an expert client will escort the

man to a nearby facility of his choice to join the facility-based ART cohort. Peer navigation will be provided to ensure men become familiar with the facility-based program. Men who wish to attend a facility that is not nearby will be linked with a male counselor from the selected facility. After completing all facility-based ART services for that day, the male partner will receive additional client-centered counseling with the same counselor to discuss the experience, benefits and challenges associated with facility-based ART, and strategies to overcome barriers. See Arm 3 diagram below:



Fig 4. Timing of interventions to be offered in Aim 3

Legend:

● Approximate time the intervention will be offered (approximately every 2 weeks until 76 days, or until ART initiation, whichever comes first)

4.2. Place of study

All study activities will take place in 10 Partners in Hope supported facilities within the Lilongwe and Chikwawa districts, representing 19,198 adult female ART clients across all sites. These districts were chosen because they are priority districts for the Presidents Emergency Plan for AIDS Relief (PEPFAR) and have the highest HIV prevalence and unmet need of all Partners in Hope supported districts. See Table 3 for the selected 10 health facilities.

Table 3: Selected study sites

| District   | Facility name                 | ART Cohort Size |
|------------|-------------------------------|-----------------|
| Chickwawa  | St. Monftord Mission Hospital | 3533            |
| Chickwawa  | Kalemba Community Hospital    | 2087            |
| Chikwawa   | Chickwawa District Hospital   | 4898            |
| Kasungu    | Kasungu District Hospital     | 5942            |
| Lilongwe   | Nkhoma Community Hospital     | 2166            |
| Lilongwe   | Mponela Rural Hospital        | 1099            |
| Lilongwe   | Daeyang Luke Hospital         | 1594            |
| Nkhotakota | Nkhotakota District Hospital  | 5361            |



|        |                          |      |
|--------|--------------------------|------|
| Nsanje | Nsanje District Hospital | 3904 |
| Nsanje | Ngabu Rural Hospital     | 1237 |

Specific methodology for each Objective is described below:

### 4.3. OBJECTIVE 1

**Evaluate the effectiveness of the Staged ART Intervention vs Lightest Touch Intervention (primary analysis) and the effectiveness of the Staged ART Intervention vs Intensive Intervention (secondary analysis) on ART initiation within 4-months after enrolment in the trial.**

- **Hypothesis 1.1:** 25% of men will initiate ART with simple reminders compared to 45% with motivational interviewing
- **Hypothesis 1.2:** 65% of men will initiate ART with home-based ART initiation compared to 45% with motivational interviewing

#### 4.3.1. Study design

We will conduct an individually randomized controlled trial at 10 high-burden facilities in Malawi.

#### 4.3.2. Target population

We will enroll 543 HIV-positive men identified through routine Index HIVST strategies and their female partners (1,086 participants total). While men are the primary focus of the study, female partners will be enrolled in order to understand their perception of their male partners use of ART services, acceptability of the intervention, and any unintended outcomes or adverse events.

##### *Eligibility Criteria*

Female ART clients will be enrolled in order to conduct baseline and follow-up surveys to understand their perception of their male partners use of ART services, acceptability of the intervention, and any unintended outcomes or adverse events.

##### *Female Partner*

- Inclusion criteria include: (1) client and partner are  $\geq 15$  years of age; (2) partner lives in facility catchment area; (3) partner tested HIV-positive and has not initiated ART; and (4) ART client reports no interpersonal violence (IPV) as defined by WHO with their current sexual partner in the past 12 months.
- Exclusion criteria include: (1) client and partner are  $< 15$  years of age; (2) partner does not live in facility catchment area; (3) partner has not tested HIV-positive or has testing positive and has initiated ART; and (4) ART client has reported interpersonal violence (IPV) as defined by WHO with their current sexual partner in the past 12 months.

Men will be enrolled as the primary recipient of the intervention.

##### *Male partner*

- Inclusion criteria include: (1) self and partner  $\geq 15$  years of age; (2) live in the facility catchment area (i.e., in the past 30 days, has spent  $\geq 50\%$  of all nights in the village); (3) has tested HIV-positive and has not initiated ART;

- Exclusion criteria include: (1) self and partner <15 years of age; (2) does not live in the facility catchment area (i.e., in the past 30 days, has spent <50% of all nights in the village); (3) has not tested HIV-positive or has tested HIV-positive and has initiated ART

4.3.3. **Sampling techniques and enrollment**

Sampling, screening, and enrolling male partners will be embedded within routine Index HIVST strategies.

*Brief description of Routine MOH HIVST Guidelines*

Briefly, routine Index HIVST includes three steps:

- *Identify ART clients with sexual partners in need of Index HIVST:* as outlined in the Malawi guidelines within the health care facility.
- *Distribute Index HIVST:* ART clients with a partner of unknown status will receive standard Index HIVST kit. They will be provided a demonstration, counseling, and an overview of risks and benefits.
- *Follow-Up on Index HIVST Use:* During their next ART appointments, ART clients are asked about HIVST distribution, use, and result of the HIVST kit, along with male partner linkage to a health facility for those who tested HIV-positive (i.e., confirmatory HIV testing and ART initiation). Data are documented in the Index HIVST register.

Once routine Index HIVST activities are completed, study recruitment and enrollment will commence. See Figure 3 for a complete description of participant enrollment and study activities.

**Figure 3: Study screening and enrollment procedures flow chart**



4.3.4. **Study Activities**

*Female ART client recruitment*

1  
2  
3 To maximize the number of male partners available for enrollment, the study team will introduce study  
4 invitation cards as part of Index HIVST activities and include them with HIVST kits distributed as a part  
5 of routine Index HIVST procedures (described above). Study invitation cards will include a 'hotline'  
6 phone number and will not provide any HIV specific information to ensure confidentiality. (see Appendix  
7 A for study invitation card). Female partners will be informed that should their male partner be found  
8 HIV-positive, they and their partner may be eligible for a study and should call the hotline number of the  
9 invitation card to receive more information.  
10

11 In addition, the study team will review the Index Testing Register on a regular basis to identify female  
12 ART clients who reported HIV-positive male partners through routine Index HIVST procedures. Female  
13 ART clients identified will be contact by routine facility staff to be informed about the study and refered  
14 to study staff if interested in enrollment.  
15

#### 16 *Female ART client enrollment*

17  
18 Female partners interested in the study will provide oral consent to participate in study screening and be  
19 screened for eligibility for the study (Appendix B). Study staff will conduct all consent and screening  
20 activities. If eligible and willing to participant, written informed consent will be obtained (Appendix C).  
21 Female partners will be enrolled even if their male partner (1) does not consent to study participation (2)  
22 cannot be traced.  
23

24 Upon enrollment in the study, female ART clients will work with study staff to make a plan for inviting  
25 male partners to enroll in the study. Baseline surveys with female ART clients will be conducted that  
26 same day or on a day convenient for the female ART client. Women whose partners agree to participate  
27 in the study will be followed up after 4-months for a follow up survey regardless of the outcome of their  
28 partner (ie loss-to-follow-up).  
29

#### 30 *Male partner recruitment*

31  
32 Once female ART clients are enrolled, male partners will be recruited, screened, and consented. Study  
33 staff will work with the female ART client to establish a recruitment plan that is acceptable and feasible  
34 for the women. This may include women referring male partners to the study staff, study staff actively  
35 recruiting male partners based on information provided by the female client, or a joint approach where the  
36 study staff approaches male partners with the female ART client. Each female ART client enrolled in the  
37 study will be allowed to choose the recruitment strategy that best fits her individual situation and the  
38 needs of her partner.  
39  
40

#### 41 *Male partner enrollment*

42  
43 Men found eligible and willing to participate, will provide written informed consent (Appendix D) and  
44 will be randomized to one of the three study arms. Randomization will occur using an electronic  
45 randomization system on tablet devices. A baseline survey will be concuted immediately following  
46 consent and the intervention will be carried out over the course of 3 months. Men will be contacted by the  
47 study staff 4-months after enrollment for a follow-up survey.  
48  
49

#### 50 *Randomization*

51  
52 Randomization will be conducted after completion of the baseline survey with male participants. Study  
53 staff will show randomization results as a picture on a pre-programmed tablet, allowing the participant to  
54 view the results themselves in order to maximize transparency and study buy-in. Male participants will be  
55 randomized to 1 of three arms and will be randomized 1:1:1.  
56  
57  
58  
59  
60

### Intervention

Interventions will be offered immediately after study enrollment (that same day or the closest day that is convenient for the male participant). Follow-up interventions will be offered every 14 days after enrollment until 76 days after enrollment in the study or ART initiation is reached, whichever comes first. See a full description of the intervention in the Intervention Description section (4.1).

Intervention arms include:

1. **Lightest touch arm:** reminders and peer navigation to facility-based ART services
2. **Staged arm:** intervention builds in intensity each month for those who have not initiated ART in the previous month. Strategies include reminders and peer navigation, motivational interviewing, and home-based ART initiation
3. **Intensive arm:** home-based ART initiation + motivational interviewing + peer navigation to facility-based ART services for their 4-week follow-up appointment

Male expert clients and male nurses will complete all intervention activities to ensure it is as close to real-world implementation as possible (not implemented by Research Assistants). Research Assistants will support facility staff to ensure men are given the appropriate intervention (based on randomization arm), and that all staff activities related to the intervention are documented (i.e., how many reminders were given to each client, ect.). Intervention monitoring and evaluation tools will be developed and incorporated into the facility staff daily routine. Weekly reviews of all intervention monitoring tools and planning for the following week will be completed with study expert clients, nurses, and Research Assistant to ensure adherence to the study protocol. The Study coordinators and PI's will be highly involved throughout the implementation process to ensure protocol adherence.

#### 4.3.5. Data collection techniques and tools

Data collection tools will include:

- **Baseline Survey:** Research assistants will administer baseline surveys with both female ART clients and male partners immediately following enrollment (before randomization). Surveys will collect data on male and female demographics, sexual partnerships and couple dynamics, and men's history with health services, and HIV services specifically. (Appendix E & F)
- **Follow-up Survey:** Research assistants will administer follow-up surveys with female ART clients and male participants 4-months after enrolment in the study. Follow-up surveys with men will assess the primary outcome of interest (ART initiation and completion of 4-week follow-up appointment), acceptability of the intervention, and any adverse events (ie., unwanted status disclosure). Men who cannot be reached will be counted as failures for true ART initiation. Follow-up surveys with female ART clients will assess acceptability of the intervention and any adverse events (i.e., IPV, end of the relationship, or unwanted disclosure) associated with intervention procedures. (Appendix G & H)
- **Medical Chart Reviews:** Identifiers will be collected for all men enrolled in the study, including name, age, village and address, and phone number. Identifiers will be used to conduct medical chart reviews at 4-months after enrollment as another measure of ART initiation (attendance to the 4-week follow-up ART appointment). Facility staff (established data clerks employed by Partners in Hope) will review medical records at study facilities and all other Partners in Hope

supported facilities within participating districts (61 facilities in total) to account for men who engage in ART outside study facilities. We successfully used this method in other HIVST studies to capture ART initiation.<sup>3</sup> Male partners who are not found in medical chart reviews will receive a follow-up home-visit to confirm ART outcomes through review of their individual medical record book (health passport) and self-reporting in the event that there are gaps in the record. Men who cannot be reached will be counted as failures for true ART initiation. (Appendix I)

- *Process Implementation Data:* Expert clients, nurses, and research assistants will keep daily logs as part of study monitoring and evaluation tools in order to assess the implementation of the intervention for each participant. Primary events to be recorded in the daily logs are: (1) unable to reach participant (and reason); (2) contacted participant; (3) intervention provided (and notes about the challenges and successes of the interaction; and (4) other comments relevant to intervention implementation. Each event will be recorded with a corresponding date.

Primary and secondary outcomes are measured through medical chart reviews and follow-up surveys (see Table 4).

**Table 4: Study Measures for Objective 1**

| Outcome                                                                                                                   | Measurement                                                                                                                  | Source                           |
|---------------------------------------------------------------------------------------------------------------------------|------------------------------------------------------------------------------------------------------------------------------|----------------------------------|
| <b>Primary Outcomes</b>                                                                                                   |                                                                                                                              |                                  |
| Early ART Retention                                                                                                       | Proportion of men who initiate ART at 3-months and attended their 4-week ART refill appointment at 4-months after enrollment | Medical chart review at 4-months |
| <b>Secondary Outcomes</b>                                                                                                 |                                                                                                                              |                                  |
| ART initiation                                                                                                            | Proportion of men who initiate ART at 3-months after enrollment                                                              | Medical chart review at 3-months |
| Adverse events by female ART client (IPV, unwanted disclosure, end of relationship) or male partner (unwanted disclosure) | Self-report from female ART client and their male partners who were identified as HIV-positive                               | Follow-up surveys at 4-months    |
| <b>Process Outcomes</b>                                                                                                   |                                                                                                                              |                                  |
| Proportion of female ART clients who consent                                                                              | Proportion of eligible ART clients who consent to the participate in the study                                               | Process implementation data      |
| Proportion of men traced                                                                                                  | Proportion of men who were successfully traced within 3-months after female ART client is enrolled                           | Process implementation data      |
| Proportion of men who consented                                                                                           | Proportion of eligible men who consent to participate in the study                                                           | Process implementation data      |

- *Sensitivity analyses for men excluded from the trial:* We recognize that men's consent to participate in the study may bias the sample enrolled in the study. There are two groups that we may not be able to include in the main study: (1) men we are unable to trace/contact (herein referred to as "unreachable men") and (2) men we are able to reach but who refuse to participate in the main trial (herein referred to as "male refusers"). We will take two approaches to address this potential bias
  - Unreachable Men: We will collect data on men who are unreachable via their female partner. Female partners for these men will complete a brief survey regarding Surveys will collect data on male and female demographics, sexual partnerships and couple dynamics, and men's history with health services, and HIV services specifically (as reported by female partners). We successfully used similar methods in the Index HIVST Trial.
  - Male Refusers: Men who are contacted but do not consent to the trial will be consented for a one-time survey immediately following refusal for the larger study. The same data will be collected, as described above.

#### 4.3.6. *Sample size determination*

We powered the study to detect differences in ART initiation between Lightest Touch and Staged Interventions at 4-months after enrollment (primary outcome). We also assured we were powered to detect differences in ART initiation between Staged Interventions and the Intensive Intervention. We Assume that 25% of men in the Lightest Touch arm, 55% in the Staged Intervention arm, and 75% in the Resource Intensive arm initiate ART at 3-months and attend their 4-week follow-up appointment at 4-months. Any man lost to follow-up in any arm will be treated as failures for the outcome evaluation. The sample size needed to detect this difference with the power of 0.8 is 181 men per arm. The calculation is based on asymptotic normality of log odds ratio. We need to enroll and randomize a total of 543 HIV-positive men. Assuming that 25% of women have partners of unknown status, 65% of male partners will use the HIVST kit, 25% of them will be HIV-positive, and 80% of them will enroll in the study, we will need to screen over 3,000 women who were given index HIVST to reach the required sample size.

#### 4.3.7. *Data analysis*

All randomized men will be included in the analysis of primary outcomes; men with missing outcome assessment due to loss to follow-up will be treated as outcome failures. All primary outcomes are binary; they will be analyzed by logistic regression models with intervention as a predictor, adjusted for baseline socioeconomic and demographic variables. We will conduct sensitivity analyses to account for men who we were never able to contact (unreachable men) and men who refused to participate in the full trial (refusers). We will run several analyses whereby the denominator includes (1) unreachable men and refusers; and (2) refusers.

### 4.4. OBJECTIVE 2

#### **Identify individual-, community-, and facility-level factors associated with ART initiation within each intervention arm (Lightest Touch; Staged; and Intensive Interventions).**

- **Hypothesis 2.1:** In quantitative data, older men, men without strong social support networks, men with high levels of internalized and perceived HIV-related stigma, and men who hold rigid beliefs of gender norms and men's role as the provider and decision maker of the home will be less likely to initiate ART.
- **Hypothesis 2.2:** In qualitative data, primary factors influencing men's decision to start ART will be perceptions of feeling healthy, perceptions of one's ability to continue working and providing for their family without ART initiation, and perceptions of HIV-related stigma within one's community.

#### 4.4.1. *Study design*

We will use baseline survey data from the randomized trial (Objective 1) to identify factors associated with ART initiation among men. We will also conduct 200 semi-structured in-depth qualitative interviews with a random sub-set of enrolled men (n=100) and their female partners (n=100) to assess in-depth characteristics of men who fail to engage in care, contextualize decisions around ART initiation and retention, and understand additional strategies that may be needed for male partners to successfully initiate and be retained in ART programs.

#### 4.4.2. *Target population*

All men and women enrolled in the overarching trial will complete a baseline survey. Eligibility criteria for study enrollment is described in detail under Objective 1.

A subset of men and women enrolled in the overarching trial will be randomly selected to complete an in-depth interview. Eligibility criteria for in-depth interview are as follows:



### Male partners

- Inclusion criteria include: (1) randomly selected using electronic random selection techniques; (2) linked to care within 4-months after enrolling in the study (defined as completing the 4-week ART refill appointment) (n=50 respondents); or (3) did not link to care within 4 months (n=50 respondents)
- Exclusion criteria include: (1) not randomly selected using electronic random selection techniques

### Female partners

- Inclusion criteria include: (1) randomly selected using electronic random selection techniques; (2) partners could never be traced for study enrollment; or (3) partners were enrolled but were lost to follow up and unable to be reached again
- Exclusion criteria include: (1) not randomly selected using electronic random selection techniques; (2) partners could be traced for study enrollment; or (3) partners were enrolled and were not lost to follow up and were able to be reached again

#### 4.4.3. Sampling techniques and tools

Survey data will include all men and women enrolled in the study (n=1,086; described in detail in Objective 1). 100 men (~ 33 per study arm) and 100 women (~ 33 per study arm) enrolled in the study will be randomly be selected for in-depth interviews.

#### 4.4.4. Data collection techniques and tools

**Surveys:** Baseline and 4-month follow-up surveys will be conducted with men and women enrolled in the trial. They will focus on:

- *Health care system:* perceptions regarding the following aspects of ART services (i) privacy and confidentiality; (ii) availability of services; (iii) wait-time and distance to facility; (iv) quality of care and rude behavior from health care providers, using validated measures.
- *Sociodemographics:* (i) age; (ii) household assets; (iii) work; and (iv) substance use
- *Couple characteristics:* (i) relationship type and length; (ii) sexual activity and risk; (iii) frequency of communication; (iv) disclosure; (v) joint decision making using standard measures from Demographic Health Survey (DHS);<sup>17</sup> (vi) gender norms using validated Gender Equitable Men (GEM) Scale,<sup>67</sup> and (v) Revised Conflict Tactics Scale.<sup>68</sup>
- *Knowledge/perceptions and biomedical factors:* (i) knowledge about HIV and ART (treatment as prevention, benefits of early ART); (ii) risk perception (morbidity and mortality); standard DHS measures on (iii) previous use of HIV services and (iv) self-rated health;<sup>17</sup> and (v) WHO staging at enrollment.

**In-depth interviews:** Table 5 below describes in-depth interview participants and justification. In-depth interview guides for men and women are developed based on existing literature and our extensive experience conducting in-depth interviews with this population (Appendix J and K). Female partners will provide important insight into the circumstances of these men, and potential strategies to more effectively reach them. Men's qualitative feedback is particularly important for the staged intervention and intensive intervention since these are fairly novel and under explored.

**Table 5.** Description of in-depth interview participants and justification

| Participant type                                                                         | Number of interviews | Justification                                                                                                                                           |
|------------------------------------------------------------------------------------------|----------------------|---------------------------------------------------------------------------------------------------------------------------------------------------------|
| Women whose male partners were <b>unreachable</b> during the study enrollment            | 50 (~ 16 per arm)    | To understand the couple dynamics and characteristics of men who were never traced and additional strategies to reaching these men                      |
| Women whose male partners were <b>loss-to-follow-up after</b> study enrollment           | 50 (~ 16 per arm)    | To understand the couple dynamics and characteristics of men who were loss-to-follow-up, and additional strategies to better engage these men in care   |
| Male participants who <b>did not</b> complete 4-week ART refill appointments by 4-months | 50 (~ 16 per arm)    | To understand what they liked and did not like about the intervention, why they did not link to ART, and suggestions on how to improve the intervention |
| Male participants who completed 4-week ART refill appointments by 4-months               | 50 (~ 16 per arm)    | To understand what they liked and did not like about the intervention, why they linked to ART, and suggestions on how to improve the intervention       |

#### 4.4.5. Sample size determination

Survey sample size details provided in Objective 1. The number of interviews required for qualitative data can be challenging to predict. Data should be collected until saturation is reached, meaning that no new themes or relevant information is emerging. The exact number of interviews required to reach saturation differs based on the aim of the study, the diversity in respondents, and the theoretical framework used for analysis.<sup>30</sup> However, a basic rule of thumb is that no sample size should be under 25 participants in order to reach saturation and identify all relevant themes or new information important to the study.

#### 4.4.6. Data analysis

**Surveys:** Subjects with complete data in outcomes as well as predictors will be included in the analysis. We will calculate descriptive statistics, including mean/median, variation (standard deviation, kurtosis), range, and frequency distributions for the demographic and clinical characteristics, overall and by study arm. Logistic models will be developed for the probability of a positive outcome, with sociodemographic factors included as covariates in a suitable form (linear/spline/factor). Differences in the prevalence of each of the outcomes of interest will be examined by study arm as well as by other factors of interest including demographic characteristics (e.g., age), couple characteristics, and knowledge/perceptions and biomedical knowledge. The differences will be evaluated using t-tests, Mann-Whitney U test (or other non-parametric tests), chi-square methods, and Fisher's exact test as appropriate.

**In-depth interviews:** Audio recordings of in-depth interviews will be transcribed and translated to English. A preliminary codebook will be developed for both interview types (male and female). Selected investigators will pilot a codebook by independently reading and coding a randomly-selected subset of transcripts. Through an iterative consultative process, each investigator will revise their respective codebook and repeat this process until there was high interrater reliability among the group. All



transcripts will be coded in Atlas.ti v8.3 using constant comparison, and coding disagreements were resolved by consensus.

#### 4.5. OBJECTIVE 3

##### **Determine the cost-effectiveness and scalability of the intervention arms through costing and mathematical modeling.**

- **Hypothesis 3.1:** The staged intervention will be more cost effective at having men initiate ART than both the lightest touch intervention and the intensive intervention.

##### **4.5.1. Study design**

We will conduct an incremental cost-effectiveness analysis and mathematical modelling to determine national scale-up potential. The average cost per successful outcome (early ART retention) will be calculated and compared across arms incrementally.

##### **4.5.2. Data collection techniques and tools**

Costs will be measured from the health care provider. We will use micro-costing methods by first creating an inventory of all the resources used to achieve the observed study outcomes including:

- Standard counseling interactions (staff cadre, training received, duration of interaction and distance from facility travelled where applicable)
- Motivational interviewing interactions (staff cadre, training received, duration of interaction and distance from facility travelled where applicable)
- Provider interactions (staff cadre, training received, duration of interaction and distance from facility travelled where applicable)
- Cost of reminder messages sent (when messages delivered telephonically instead of in person)

For each study patient, the quantity (number of units) of resources used will be determined. Unit costs of resources, which are not human subject data, will be obtained from external suppliers and the site's finance and procurement records and multiplied by the resource usage data to provide an average cost per study patient across centers in each study arm.

##### **4.5.3. Data analysis**

**Cost-Effectiveness:** Using the average cost per patient as described above, we will then estimate the cost per outcome achieved in each arm. The main measure of effectiveness for the cost-effectiveness analysis will be both the primary study outcome (early ART retention). We will calculate the difference in cost divided by the difference in effectiveness among study arms. Costs will be reported as means (standard deviations) and medians (IQRs) in USD, using the exchange rate prevailing during the follow up period.

**National scale-up modeling:** To determine the budget impact and affordability of the intervention arms, we will parameterize a national scale-up model using the study output. To determine the total cost and impact of the three intervention arms, as well as combinations of interventions, we will model cost and impact out to early ART retention (ART initiation and completion of the 4-week ART refill appointment). The following parameters to be estimated from this trial include:

- Percent of men not linking after HIVST (and thus eligible for this trial)

- Proportion of men that have not linked that could be reached
- Proportion of men that are known HIV-positive and on ART (not disclosed to their partner)
- Proportion of men that initiate ART
- Proportion of men that complete the 4-week ART refill appointment

We will then estimate the expected increase in the number of men linked to ART after index HIVST, adjusted by facility type where possible, by each intervention arm. The number of facility-level HIV tests conducted through index testing at all 652 public healthcare facilities in Malawi from Oct 2019-Sept 2020 will be used for these national calculations. Each intervention will be tested separately in this model, as well as different combination of interventions. Different scenarios will be explored where interventions are used at different facilities (urban versus rural targeting of interventions, geospatial targeting of interventions), or different groups of men within the same facility (where data suggest that different demographics of men respond differently to the different interventions).

The national-level costs and expected number of men linked to ART, by each intervention and combinations of interventions, will be reported from this model. We will then contextualize the national cost of each intervention with a short-term 3-year budget impact: percent increase (or decrease) of the national HIV treatment budget with the inclusion of one of these interventions

## 5. ETHICAL CONSIDERATIONS

There is minimal risk associated with the above-mentioned procedures. We have extensive experience measuring ART initiation within HIVST studies. We conducted the first trials in the region to objectively measure ART initiation among men after receiving HIVST through the Index HIVST Trial (PI: Dovel) and PASTAL Trial (male partners of antenatal clients; PI: Choko). We draw from lessons learned from our previous trials.

### *Informed Consent*

Informed consent will be obtained before any study-specific procedures are performed. The informed consent process will include information exchange, detailed discussion, and assessment of understanding of all required elements of informed consent, including the potential risks, benefits, and alternatives to study participation. The process will emphasize the randomized nature of the study and the differences that participants may experience as part of the study relative to current local standards of care. The study will include children 15 years of age and older. Following Malawian protocol, adolescents <18 years of age will be required to attain assent before completing the survey. Based on prior studies, we anticipate <10% of participants to be under 18 years of age, providing a small sample size to explore the potential impact of facility-based testing for youth.

### *Potential Benefits*

Men who participate in the study may have access to additional HIV services not usually provided through routine care, such as appointment reminders, peer navigation, motivational interviewing, and home-based ART initiation. Men can refuse these additional services at any point. Further, both men and women will have the opportunity to discuss their use of HIV services and any concerns with HIV as individuals or as a couple. Information learned in this study may be of benefit to participants and others in the future, particularly information that may lead to optimized testing guidelines.

### *Potential risks and discomforts*

Study procedures have minimal risk to the client. For men, maintaining privacy and confidentiality is a potential risk, particularly with home-based ART initiation. In our prior work delivering routine Index

1  
2  
3 HIVST, we have had health workers visit a cluster of homes (not just one) to avoid unwanted questions  
4 about the individual's serostatus. This has worked quite well, with no reports of unwanted disclosure, and  
5 we will use this approach in our proposed study to minimize risk of unwanted disclosure. Further, men  
6 may refuse any ART service at anypoint if they are uncomfortable.  
7

8 For women, increased intimate partner violence (IPV) may be a potential risk, particularly if their male  
9 partner is prone to violence. To reduse these risks, women who report IPV with their current partner in the  
10 past 12 months will be excluded from the study. Female ART clients who report IPV at anypoint of the  
11 intervention will be withdrawn from the study, along with their male partner, counseled, and referred to  
12 community-based resources for IPV. We also will provide extensive counseling on status disclosure and  
13 an IPV hotline to all female participants. Further, Our PASTAL and Index HIVST Trials show no sign of  
14 increased IPV and we have published extensively on risk factors for IPV in other settings.<sup>71-73</sup>  
15

16 Finally, Participation includes completion of a survey that will assess previous use of health services,  
17 perceptions of health services received, and sociodemographic and biomedical factors that may be  
18 associated with health service utilization. Participants may feel some psychological stress or discomfort  
19 from some of the questions, although most questions are not sensitive in nature. Participants may decline  
20 to answer any questions that make them uncomfortable and may end participation at any time.  
21

#### 22 *Reimbursement/compensation*

23 Participants will be provided MK 7,500 (equivalent to 10USD) for each survey completed (MK 15,000 /  
24 20USD across the duration of the study). They will receive the above compensation regardless if they use  
25 HIV services or not. Those who complete the additional in-depth interview 6-months after study  
26 enrollment will receive an additional MK 7,500 (equivalent to 10USD) for their time.  
27

#### 28 *Privacy and confidentiality*

29 All study procedures will be conducted in private, and every effort will be made to protect participant  
30 privacy and confidentiality to the extent possible. Participant information will not be released without  
31 written permission to do so except as necessary for review, monitoring, and/or auditing. All study-related  
32 information will be stored securely. Participant research records will be stored in locked areas with access  
33 limited to study staff. All study data will be identified by participant ID (PID) only. Likewise,  
34 communications between study staff and protocol team members regarding individual participants will  
35 identify participants by PID only. Process evaluation documents, such as intervention monitoring and  
36 evaluation tools, will only include PID and will not store PID and identifiers together. All local databases  
37 will be encrypted and secured with password-protected access systems. Lists, logbooks, appointment  
38 books, and any other documents that link PID numbers to personal identifying information will be stored  
39 in a separate, locked location in an area with limited access. For the intervention, home visits will be  
40 conducted by health workers who visit a cluster of homes (not just one) at one time in order to avoid  
41 unwanted questions about the individual's serostatus. This has been used in other interventions focused  
42 on partner testing and treatment with high success of removing unwanted disclosure to community  
43 members.  
44  
45  
46

## 47 **6. DISSMINATION OF RESULTS**

48  
49 This study will set the stage for interventions that combine HIVST with differentiated models for early  
50 ART retention in low-resource settings. The study is timely and of high-impact. Findings will establish  
51 the effectiveness of home-based ART among male HIVST users, and can directly inform HIV programs  
52 throughout the region. The dissemination plan was developed to achieve the most impact while still  
53 ensuring dissemination among local stakeholders who may immediately benefit from study findings.  
54

55 Partners in Hope is already integrated into national technical working groups, so dissemination will  
56 follow standard meeting schedules and draw upon Partners in Hope's longstanding history with the  
57  
58  
59

1  
2  
3 Ministry of Health. Additionally, we will disseminate results through presentations at international  
4 scientific meetings and through high-impact peer-reviewed journals. The mentorship team has extensive  
5 experience publishing in high-impact journals (e.g., *AJPH*, *AIDS*, *BMJ*, *Lancet HIV*, *JAIDS*, *PLOS Med*)  
6  
7

## 8 **7. PERSONNEL ROLES AND INSTITUTIONS**

9  
10 The proposed research team includes clinical researchers and implementation science professionals with  
11 substantial experience in HIV testing, HIV prevention and treatment, cost effectiveness, differentiated  
12 care model studies, and male-focused studies and programs in Malawi and Sub-Saharan Africa. The study  
13 will be implemented in partnership with Partners in Hope Medical Center in Lilongwe, which has years of  
14 experience collaborating with Ministry of Health and local health facilities on similar studies, mentoring  
15 staff, and running studies embedded within routine clinical care.  
16

- 17 • Kathryn Dovel, MPH, PhD, Principle Investigator, Division of Infectious Disease University
- 18 of California Los Angeles (UCLA) and Research Director for Partners in Hope
- 19 • Thomas Coates, PhD, Co-Investigator, Division of Infectious Disease UCLA
- 20 • Risa Hoffman, MPH, MD, Co-Investigator, Division of Infectious Disease UCLA
- 21 • Brooke Nichols, Co-Investigator, School of Global Health, Boston Univeristy
- 22 • Lawrence Long, Co-Investigator, School of Global Health, Boston Univeristy
- 23 • Alemayehu Amberbir, Co-Investigator, Partners in Hope
- 24 • Augustine Choko, PhD, Site Co-Investigator, Malawi Liverpool Wellcome Trust
- 25 • Michal Kulich, Biostatistician, Charles Univeristy in Prauge
- 26 • Julie Hubabrd, MSc, Study Coordinator, Partners in Hope
- 27 • Kelvin Balakasi, Study Data Manager, Parners in Hope
- 28 • Khumbo Phiri, Implimentation Science Manager, Partners in Hope
- 29
- 30

31  
32 Dr. Kathryn Dovel, the Principle Investigator, is the Science Director at Partners in Hope and an Assitant  
33 Assistant Professor in the Division of Infectious Diseases at UCLA. Dr. Dovel has over ten years of  
34 experience in Malawi and collaborating with the study team. She is regularly involved in UNAIDS and  
35 WHO workshops and meetings regarding strategies for male engagement, and has been a consultant on  
36 two Ministry of Health guidelines on the topic in Malawi.  
37

38 Dr. Augustine Choko will be responsible with Dr. Dovel for overall adherence to the study protocol and  
39 serve as the primary liaison with the local IRB and key stakeholders in Malawi. Dr. Thomas Coates will  
40 serve as the community-based trials specialist, with over two decades of experience conducting  
41 individual- and cluster-randomized trials in communities with the end goal of engagement in HIV  
42 services. Dr. Risa Hoffman is an established clinical investigator and will serve as the MD specializing in  
43 differentiated models of ART treatment delivery and HIV care, and ensuring client safety. Brooke  
44 Nichols and Lawrence Long will be responsible for reviewing all modeling data, making an analysis plan  
45 for the proposed models, and providing modeling for publications. Dr. Michal Kulich is the Chair of the  
46 Probability and Statistics Department at Charles University and has extensive experience with the design,  
47 conduct, and analysis of clinical trials in the context of HIV prevention research.  
48

49 Partners in Hope's staff Kelvin Balakasi (Data Manager) Julie Hubbard (Research Coordinator), Khumbo  
50 Phiri (Implimentation Science Manager) and Alemayehu Amberbir (Science Director) will be responsible  
51 implimentation and oversight inlcuidng data collection, data management, quality control, and training  
52 and certification of data entry personnel. They will also be responsible for ensuring the intervention  
53 promotes client safety, meets Ministry of Health guidelines, and is implemented in such a way to promote  
54 sustainability and scalability.  
55

56 CV's for participating personelle are provided in the Appendix L.  
57  
58  
59  
60

## 8. REGULATORY OVERSIGHT

This study is sponsored by the Bill and Melinda Gates Foundation and implemented through Partners in Hope (PIH), Malawi. PIH staff will perform monitoring visits. As part of these visits, monitors will inspect study-related documentation to ensure compliance with all applicable regulatory requirements.

All health facilities will receive an Initial Registration Notification from PIH that indicates successful completion of the protocol registration process. A copy of the Initial Registration Notification will be retained in the site's regulatory files.

We have developed a trial advisory group. See Table 6 for details about the group members. The group will meet every quarter to review progress, and challenges with study implementation, and provide input on the final interventions to be tested, based on qualitative findings in Aim 1.

*Table 6. Description of trial advisory group*

| Name                 | Affiliation                                                                  | Expertise                                                                                                                                                                   |
|----------------------|------------------------------------------------------------------------------|-----------------------------------------------------------------------------------------------------------------------------------------------------------------------------|
| Dr. Morna Cornell    | University of Cape Town                                                      | Epidemiologist, health system barriers to men's care, men's HIV services, advocacy and policy change                                                                        |
| Dr. Heidi van Rooyen | SA Human Sciences Research Council                                           | Social scientist, HIV vulnerability and inequality, interventions for men's ART initiation                                                                                  |
| Dr. Deborah Donnell  | University of Washington, Fred Hutch Vaccine and Infectious Disease Division | Biostatistician, international HIV trials, PI of the HPTN Statistical and Data Management Center                                                                            |
| Dr. Connie Celum     | University of Washington                                                     | Infectious disease physician and epidemiologist, implementation science in Africa, HIV prevention trials                                                                    |
| Dr. Thoko Kalua      | Malawi Ministry of Health, Deputy Director at Department of HIV and AIDS     | Epidemiologist. Extensive experience in national HIV programs, M&E, and scale-up of interventions on the ground                                                             |
| Dr. Sergio Chicumbe  | Mozambique National Health Institute (INS), Health System Research Cluster   | Clinical trials and implementation science. Extensive experience in national public health programs, methodology for health services research and quality care improvement. |

For any future protocol amendments, upon receiving final IRB/EC and any other applicable regulatory entity approvals, sites should implement the amendment immediately. Sites are required to submit an amendment registration packet to the PIH Protocol Team. PIH key personnel will review the submitted protocol registration packet to ensure that all the required documents have been received.

## 9. STUDY IMPLEMENTATION



Study implementation at each site will be guided site-specific standard operating procedures (SOPs). These SOPs will be updated and/or supplemented as needed to describe roles, responsibilities, and procedures for this study.

## 10. PROTOCOL DEVIATION REPORTING

All protocol deviations will be documented in participant research records. Reasons for the deviations and corrective and preventive actions taken in response to the deviations will also be documented. Deviations will be reported to site IRBs/ECs and other applicable review bodies in accordance with the policies and procedures of these review bodies. Serious deviations that are associated with increased risk to one or more study participants and/or significant impacts on the integrity of study data must also be reported to the Protocol Team as soon as possible.

## 11. WORK PLAN TIMELINE

**Table 7:** Anticipated workplan timeline of study activities, by year

| IdeAL Study Timeline                                                                                               |        |   |   |   |        |   |   |   |        |   |   |   |        |   |   |   |
|--------------------------------------------------------------------------------------------------------------------|--------|---|---|---|--------|---|---|---|--------|---|---|---|--------|---|---|---|
| Activities                                                                                                         | Year 1 |   |   |   | Year 2 |   |   |   | Year 3 |   |   |   | Year 4 |   |   |   |
|                                                                                                                    | 1      | 2 | 3 | 4 | 1      | 2 | 3 | 4 | 1      | 2 | 3 | 4 | 1      | 2 | 3 | 4 |
| Preparation                                                                                                        | X      | X | X | X |        |   |   |   |        |   |   |   |        |   |   |   |
| <b>Objective 1:3. Test the effectiveness of models of varying intensity to link patients who use HIVST to care</b> |        |   |   |   |        |   |   |   |        |   |   |   |        |   |   |   |
| Enrollment                                                                                                         |        |   |   |   | X      | X | X | X |        |   |   |   |        |   |   |   |
| Intervention and follow-up                                                                                         |        |   |   |   | X      | X | X | X | X      | X |   |   |        |   |   |   |
| Follow-up analyses & writing                                                                                       |        |   |   |   |        |   |   |   |        | X | X | X | X      |   |   |   |
| <b>Objective 2: 4. Identify factors associated with early ART retention</b>                                        |        |   |   |   |        |   |   |   |        |   |   |   |        |   |   |   |
| Baseline sociodemographic survey                                                                                   |        |   |   |   | X      | X | X | X |        |   |   |   |        |   |   |   |
| Qualitative assessment- rolling                                                                                    |        |   |   |   | X      | X | X | X | X      | X |   |   |        |   |   |   |
| Analyses & writing                                                                                                 |        |   |   |   |        | X | X |   |        | X | X | X | X      |   |   |   |
| <b>Objective 3: 5. Determine the cost and scalability of the intervention</b>                                      |        |   |   |   |        |   |   |   |        |   |   |   |        |   |   |   |
| Data collection                                                                                                    |        |   |   |   | X      | X | X | X | X      | X |   |   |        |   |   |   |
| Synthesis of results and parameter estimation                                                                      |        |   |   |   |        |   |   |   |        | X |   |   |        |   |   |   |
| Model development                                                                                                  |        |   |   |   |        |   |   |   |        | X | X | X |        |   |   |   |
| Analyses & writing                                                                                                 |        |   |   |   |        |   |   |   |        | X | X | X | X      |   |   |   |

## 12. BUDGET AND JUSTIFICATION

**Table 8:** Study budget

| Description                            | USD   | Justification                                                                                              |
|----------------------------------------|-------|------------------------------------------------------------------------------------------------------------|
| Study Coordinator                      | 5000  | 25% LOE to coordinate RAs                                                                                  |
| Research Assistant for data collection | 15000 | 5 RAs for 6 months at 500 USD per month                                                                    |
| Incentive for participants             | 21720 | 10USD per study visit, 2 study visits per participant, 1086 participants (543 men and 543 female partners) |

|                                     |               |                                                                                                                             |
|-------------------------------------|---------------|-----------------------------------------------------------------------------------------------------------------------------|
| Expert Client/Nurse lunch allowance | 720           | 6USD lunch allowance for 10 Expert Clients and 10 nurses on a monthly basis to hear from them how the intervention is going |
| Telecommunications                  | 1000          | Mobile data collection processing by RAs and communication with coordinator                                                 |
| NHSRC application fee               | 150           | Application fee                                                                                                             |
| <i>Sub Total</i>                    | <i>43,590</i> |                                                                                                                             |
| NHSRC 10% fee                       | 4,359         | 10% contribution fee of study budget                                                                                        |
| <b>Grand total</b>                  | <b>47,949</b> |                                                                                                                             |

### 13. REFERENCES

1. Dovel K, Yeatman S, Watkins S, Poulin M. Men's heightened risk of AIDS-related death: the legacy of gendered HIV testing and treatment strategies. *AIDS (London, England)*. 2015;29(10):1123.
2. UNAIDS. *Ending AIDS: Progress towards 90-90-90 Targets.*; 2017.
3. Choko AT, Kumwenda MK, Johnson CC, et al. Acceptability of woman-delivered HIV self-testing to the male partner, and additional interventions: a qualitative study of antenatal care participants in Malawi. *Journal of the International AIDS Society*. 2017;20(1):21610.
4. Yeatman S, Chamberlin S, Dovel K. Women's (health) work: A population-based, cross-sectional study of gender differences in time spent seeking health care in Malawi. *PLoS one*. 2018;13(12).
5. Mills EJ, Beyrer C, Birungi J, Dybul MR. Engaging men in prevention and care for HIV/AIDS in Africa. *PLoS medicine*. 2012;9(2).
6. Malawi National Statistics Office. *Demographic Health Survey: Malawi.*; 2016.
7. Sharma M, Ying R, Tarr G, Barnabas R. Systematic review and meta-analysis of community and facility-based HIV testing to address linkage to care gaps in sub-Saharan Africa. *Nature*. 2015;528(7580):S77–S85.
8. Partners in Hope. Update on index partner testing in Partners in Hope supported sites: quarterly review. Presented at the: Malawi Ministry of Health Technical Working Group: HIV Self-Testing; 2019.
9. Dovel K, Balakasi K, Shaba F, Phiri K, Offorjebe O, Gupta S. A Randomized trial on index HIV self-testing for partners for ART clients in Malawi. In: *Conference on Retroviruses and Opportunistic Infections, Seattle.* ; 2019.
10. Johnson CC, Kennedy C, Fonner V, et al. Examining the effects of HIV self-testing compared to standard HIV testing services: a systematic review and meta-analysis. *Journal of the International AIDS Society*. 2017;20(1):21594.
11. Masters SH, Agot K, Obonyo B, Mavedzenge SN, Maman S, Thirumurthy H. Promoting partner testing and couples testing through secondary distribution of HIV self-tests: a randomized clinical trial. *PLoS medicine*. 2016;13(11).
12. Ortblad K, Musoke DK, Ngabirano T, et al. Direct provision versus facility collection of HIV self-tests among female sex workers in Uganda: a cluster-randomized controlled health systems trial. *PLoS medicine*. 2017;14(11).
13. MacPherson P, Lalloo DG, Webb EL, et al. Effect of optional home initiation of HIV care following HIV self-testing on antiretroviral therapy initiation among adults in Malawi: a randomized clinical trial. *Jama*. 2014;312(4):372–379.
14. Sibanda EL, Weller IV, Hakim JG, Cowan FM. The magnitude of loss to follow-up of HIV-exposed infants along the prevention of mother-to-child HIV transmission continuum of care: a systematic review and meta-analysis. *AIDS (London, England)*. 2013;27(17):2787.



15. Larsson EC, Thorson A, Nsabagasani X, Namusoko S, Popenoe R, Ekström AM. Mistrust in marriage-Reasons why men do not accept couple HIV testing during antenatal care-a qualitative study in eastern Uganda. *BMC public health*. 2010;10(1):769.
16. Koo K, Makin JD, Forsyth BW. Barriers to male-partner participation in programs to prevent mother-to-child HIV transmission in South Africa. *AIDS Education and Prevention*. 2013;25(1):14–24.
17. Theuring S, Nchimbi P, Jordan-Harder B, Harms G. Partner involvement in perinatal care and PMTCT services in Mbeya Region, Tanzania: the providers' perspective. *AIDS care*. 2010;22(12):1562–1568.
18. Sileo KM, Fielding-Miller R, Dworkin SL, Fleming PJ. What role do masculine norms play in men's HIV testing in sub-Saharan Africa?: a scoping review. *AIDS and Behavior*. 2018;22(8):2468–2479.
19. van den Berg W, Brittain K, Mercer G, et al. Improving men's participation in preventing mother-to-child transmission of HIV as a maternal, neonatal, and child health priority in South Africa. *PLoS medicine*. 2015;12(4).
20. Unaided HIV. *Addressing a Blind Spot in the Response to HIV—Reaching out to Men and Boys*. Joint United Nations Programme on HIV/AIDS Geneva; 2017.
21. Cornell M, Cox V, Wilkinson L. Public health blindness towards men in HIV programmes in Africa. *Tropical Medicine & International Health*. 2015;20(12):1634–1635.
22. Poulin M, Dovel K, Watkins SC. Men with money and the “vulnerable women” client category in an AIDS epidemic. *World Development*. 2016;85:16–30.
23. Pai NP, Sharma J, Shivkumar S, et al. Supervised and unsupervised self-testing for HIV in high-and low-risk populations: a systematic review. *PLOS medicine*. 2013;10(4).
24. Sharma M, Barnabas RV, Celum C. Community-based strategies to strengthen men's engagement in the HIV care cascade in sub-Saharan Africa. *PLoS medicine*. 2017;14(4).
25. Choko AT, MacPherson P, Webb EL, et al. Uptake, accuracy, safety, and linkage into care over two years of promoting annual self-testing for HIV in Blantyre, Malawi: a community-based prospective study. *PLoS medicine*. 2015;12(9).
26. Decroo T, Rasschaert F, Telfer B, Remartinez D, Laga M, Ford N. Community-based antiretroviral therapy programs can overcome barriers to retention of patients and decongest health services in sub-Saharan Africa: a systematic review. *International health*. 2013;5(3):169–179.
27. Wools-Kaloustian KK, Sidle JE, Selke HM, et al. A model for extending antiretroviral care beyond the rural health centre. *Journal of the International AIDS Society*. 2009;12(1):22–22.
28. Apondi R, Bunnell R, Awor A, et al. Home-based antiretroviral care is associated with positive social outcomes in a prospective cohort in Uganda. *JAIDS Journal of Acquired Immune Deficiency Syndromes*. 2007;44(1):71–76.
29. Jaffar S, Amuron B, Foster S, et al. Rates of virological failure in patients treated in a home-based versus a facility-based HIV-care model in Jinja, southeast Uganda: a cluster-randomised equivalence trial. *The Lancet*. 2009;374(9707):2080–2089.

- 1  
2  
3 30. Malterud K, Siersma VD, Guassora AD. Sample size in qualitative interview studies: guided by  
4 information power. *Qualitative health research*. 2016;26(13):1753–1760.  
5  
6  
7  
8  
9  
10  
11  
12  
13  
14  
15  
16  
17  
18  
19  
20  
21  
22  
23  
24  
25  
26  
27  
28  
29  
30  
31  
32  
33  
34  
35  
36  
37  
38  
39  
40  
41  
42  
43  
44  
45  
46  
47  
48  
49  
50  
51  
52  
53  
54  
55  
56  
57  
58  
59  
60

## 14. APPENDIX

### 14.1. APPENDIX A – Study Invitation Cards

---

**STUDY INVITATION CARD**  
**Identifying efficient linkage strategies for HIV self-testing (IDEaL)**  
 English

---

**Study invitation Card**

Date: ...../...../2020

Dear: \_\_\_\_\_

At \_\_\_\_\_, we are conducting a study. The study will generate information that will help the Malawi government, Partners in Hope and other stakeholders develop programs that will help your community lead a healthy life. We are therefore inviting you and your partner to come to \_\_\_\_\_ on \_\_\_\_\_ at \_\_\_\_\_, so that we can assess if you are eligible for the study. If eligible, you and your partner will each receive MK 7,500 (equivalent to 10USD).

Thank you for your kind attention to this request and we look forward to seeing you. When coming call or flash this number..... so that you are met by study personnel.

Sincerely,

[District Health Officer]

**STUDY INVITATION CARD**  
**Identifying efficient linkage strategies for HIV self-testing (IDEaL)**  
 Chichewa

**Khadi Lokuyitanani Ku Kafukufuku**

Tsiku: ...../...../2020

Wokondedwa: \_\_\_\_\_

Ku chipatala cha, \_\_\_\_\_, tikupanga kafukufuku.

Kafukufukuyu adzathandiza kupeza mfundo zomwe zidzathandize boma la Malawi, bungwe la Partners In Hope ndi mabungwe/magulu ena kukhazikitsa ndondomeko zomwe zidzathandizire anthu a mdela lanu kukhala ndi umoyo wanthanzi. Choncho mukuyitanidwa pamodzi ndi okondedwa anu kuti mubwere ku \_\_\_\_\_ tsiku nthawi ya \_\_\_\_\_, ndicholinga choti tidzaone ngati muli oyenera kutenga nawo mbali mu kafukufukuyu. Mukadzapezeka kuti ndinu oyenera kutenga nawo mbali mu kafukufukuyu, inuyo komanso bwenzi lanu mudzalandira K7,500 (yokwana 10USD) aliyense.

Zikomo kwambiri chifukwa cha chidwi chanu pa pempholi ndipo ife tikuyembekezera kuzaonana nanu pa tsikuli. Mukamadzabwera, muzaimbe kapena kufulasha pa nambala iyi.....kuti muzakumane ndi anthu a kafukufukuyu.

Ndine wanu,

[District Health Officer]

## 14.2. APPENDIX B – Recruitment and Screening Script

---

### RECRUITMENT AND SCREENING SCRIPT

#### Identifying efficient linkage strategies for HIV self-testing (IDEaL)

Female

---

Thank you for speaking with me about the study entitled, “*Identifying efficient linkages strategies for HIVST*” conducted by Partners in Hope and the University of California Los Angeles in the United States. You are being approached because you recently reported that your male partner tested HIV-positive using a HIV self-test kit.

The purpose of this is to determine what are the best interventions that can help men who are diagnosed with HIV use other health services, if desired. The study will offer several different strategies for HIV services to see what works best for men who use HIV self-testing kits.

Would you be interested in participating in the eligibility screening to see if you are eligible to participate in the study? Your participation is voluntary and you will not be penalized if you choose not to participate in the screening or the project.

*[If no, thank the person and end the session]*

*[If yes, continue to the screening questions below or make an appointment to complete the screening questions]*

Before we continue with the study, we first need to determine if you are eligible to participate.

1. Are you and your partner 15 years old or older?
2. To the best of your knowledge, did your partner recently test HIV-positive using a HIV self-test kit?
3. To the best of your knowledge, your partner currently NOT taking ART?
4. Does your partner live in the facility catchment area?
5. In the last 30 days, your current partner has NEVER hit, slapped, or kicked you, or forced you to have sexual intercourse with them?

If you answered yes to all these questions, then you are eligible to participate in the study. You may stay here to continue with the study consent, and we will explain how the study will be conducted.

---

**RECRUITMENT AND SCREENING SCRIPT**  
**Identifying efficient linkage strategies for HIV self-testing (IDEaL)**  
Female (Chichewa)

---

*Zikomo kwambiri povemera kucheza nane zokhudza study yotchedwa “Kupeza njira zabwino zothandizira anthu omwe akulandira ma ARV” amene akupangidwa ndi bungwe la Partners In Hope-EQUIP polojekiti ndi sukulu ya ukachenjede ya University of California Los Angeles yaku Amerika. Mukufunsidwa kuti mutenge nawo mbali mu gawo lakafukufukuyu chifukwa bwenzi lanu lalimuna lili ndi kachiroombo ka HIV ndipo linadziwa zotsatirazi pogwiritsa ntchito ka chida koziyezera wekha.*

*Cholinga cha kafukufukuyu ndi kufuna kupeza njira zabwino zomwe zingathandize azibambo omwe ali ndi kachiroombo ka HIV kugwiritsa ntchito thandizo lina la zaumoyo, ngati akonda kutero. Studyyi idzapeleka njira zingapo zosiyanasiyana za thandizo la HIV kuti awone njira yomwe ikugwira bwino kwa azibambo omwe amagwiritsa nchito ka chida koziyezera wekha HIV.*

*Kodi muli okondwa kutenga nawo mbali mu mayele ofuna kuwona ngati muli oyenela kutenga nawo mbali mu study? Kutenga nawo mbali kwanu ndi kosakakamiza ndipo palibe chilango chilichonse ngati mungasankhe kusatenga nawo mbali mu mayele a study.*

*[Ngati ayi, thokozani munthuyo ndipo malizani session]*

*[Ngati eya, pitilizani kufunsa mafunso a mayele omwe ali munsiwa kapena sankhani tsiku loti muzamalize kufunsa mafunso]*

*Tisanapitilize ndi study, choyamba tifuna tidziwe ngati muli oyenera kutenga nawo mbali.*

- 1. Muli ndi zaka khumi ndi zisanu kapena kuposela apo?*
- 2. Monga mukudziwira kodi bwenzi lanu laziyezera kachida koziyezera wekha ndikupezeka ndi kachiroombo ka HIV?*
- 3. Monga mene mukudziwira, kodi pakadali pano bwenzi lanu likumwa mankhwala a ma ARV?*
- 4. Kodi bwenzi lanu limakhala mu dela lozungulira chipatala?*
- 5. M' masiku makumi atatu apitawa, bwenzi lanu SILINAPANGE izi kumenyani kapena kukakamizani kuti mugonane nalo?*

*Ngati mwayankha eya pa mafunso onse mwafunsidwawa, zikusonyeza kuti ndinu oyenera kutenga nawo mbali mu study. Muli omasuka kukhala ndikupitiliza chilolezo cha study, ndipo ndikufotokozerani za momwe study ichitikire.*

---

**RECRUITMENT AND SCREENING SCRIPT**  
**Identifying efficient linkage strategies for HIV self-testing (IDEaL)**  
Male

---

Thank you for speaking with me about the study entitled, “*Identifying efficient linkages strategies for HIVST*” conducted by Partners in Hope and the University of California Los Angeles in the United States. You are being approached because you recently reported testing HIV-positive using a HIV self-test kit.

The purpose of this is to determine what are the best interventions that can help men who are diagnosed with HIV use other health services, if desired. The study will offer several different strategies for HIV services to see what works best for men who use HIV self-testing kits.

Would you be interested in participating in the eligibility screening to see if you are eligible to participate in the study? Your participation is voluntary and you will not be penalized if you choose not to participate in the screening or the project.

*[If no, thank the person and end the session]*

*[If yes, continue to the screening questions below or make an appointment to complete the screening questions]*

Before we continue with the study, we first need to determine if you are eligible to participate.

1. Are you 15 years old or older?
2. You recently test HIV-positive using a HIV self-test kit?
3. You are NOT currently taking ART?
4. Do you live in the facility catchment area?

If you answered yes to all these questions, then you are eligible to participate in the study. You may stay here to continue with the study consent, and we will explain how the study will be conducted.

---

**RECRUITMENT AND SCREENING SCRIPT**  
**Identifying efficient linkage strategies for HIV self-testing (IDEaL)**  
Male (Chichewa)

---

*Zikomo kwambiri povemera kucheza nane zokhudza study yotchedwa “Kupeza njira zabwino zothandizira anthu omwe akulandira ma ARV” amene akupangidwa ndi bungwe la Partners In Hope-EQUIP polojekiti ndi sukulu ya ukachenjede ya University of California Los Angeles yaku Amerika. Mukufunsidwa kuti mutenge nawo mbali mu gawo lakafukufukuyu chifukwa muli ndi kachiroambo ka HIV ndipo munadziwa zotsatirazi pogwiritsa ntchito ka chida koziyezera wekha.*

*Cholinga cha kafukufukuyu ndi kufuna kuoza njira zabwiino zomwe zingathandize azibambo omwe ali ndi kachiroambo ka HIV kugwiritsa ntchito thandizo lina la zaumoyo, ngati akonda kutero. Studyyi idzapeleka njira zingapo zosiyanasiyana za thandizo la HIV kuti awone njira yomwe ikugwira bwino kwa azibambo omwe amagwiritsa nchito ka chida koziyezera wekha HIV.*

*Kodi muli okondwa kutenga nawo mbali mu mayele ofuna kuwona ngati muli oyenela kutenga nawo mbali mu study? Kutenga nawo mbali kwanu ndi kosakakamiza ndipo palibe chilango chilichonse ngati mungasankhe kusatenga nawo mbali mu mayele a study.*

*[Ngati ayi, thokozani munthuyo ndipo malizani session]*

*[Ngati eya, pitilizani kufunsa mafunso a mayele omwe ali munsiwa kapena sankhani tsiku loti muzamalize kufunsa mafunso]*

*Tisanapitilize ndi study, choyamba tifuna tidziwe ngati muli oyenera kutenga nawo mbali.*

- 1. Muli ndi zaka khumi ndi zisanu kapena kuposela apo?*
- 2. Kodi mwaziyezera kachida koziyezera wekha ndikupezeka ndi kachiroambo ka HIV?*
- 3. Kodi pakadali pano mukumwa mankhwala a ma ARV?*
- 4. Kodi mumakhala mu dela lozungulira chipatala?*

*Ngati mwayankha eya pa mafunso onse mwafunsidwawa, zikusonyeza kuti ndinu oyenera kutenga nawo mbali mu study. Muli omasuka kukhala ndikupitiliza chilolezo cha study, ndipo ndikufotokozerani za momwe study ichitikire.*



### 14.3. APPENDIX C – Written Informed Consent- Female

---

#### WRITTEN INFORMED CONSENT Identifying efficient linkage strategies for HIV self-testing (IDEaL) Female

---

You are asked to participate in a research study entitled “*Identifying efficient linkages strategies for HIVST*” conducted by Partners in Hope and the University of California Los Angeles in the United States. You are being requested to take part in the study because you recently reported that your male partner tested HIV-positive using a HIV self-test kit. Your participation in this study is entirely voluntary. You will be read the information below, and you are free to ask questions about anything you do not understand, before deciding whether or not to participate. ***I as the field assistant for this study will take you through this consenting process.***

- **Why is this study being done?**

HIV self-testing is very helpful for people who want to know their status but do not usually go to the health facility. However, it can be hard for individuals who test HIV-positive with HIV self-testing to be able to access other health services. Researchers want to determine what are the best interventions that can help men who are diagnosed with HIV use other health services, if desired. The study will offer several different strategies for HIV services to see what works best for men who use HIV self-testing kits.

- **What will happen if you take part in this research study?**

There are several steps to this study. if you volunteer to participate in this study you will have the opportunity to participate in the following components:

1. Allow me to trace your male partner, or take me to your male partner in order to invite him to participate in the study as well. Note, you can choose to participate in the study even if your partner refuses or you think your partner would refuse.
2. Complete one or two study visits where a research assistant like myself will interview you and ask you information about yourself, including whether you are married, number of sexual partners, your level of education, information about your experiences with HIV services, and how you feel about HIV testing and treatment services. We will ask you questions today (or a day nearby that is convenient for you) and, if your partner enrolls in the study, we will ask you similar questions again in four months in order to see if anything has changed. Each interview will last about 45minutes. You can refuse a follow-up survey at any point

1  
2  
3  
4  
5  
6  
7  
8  
9  
10  
11  
12  
13  
14  
15  
16  
17  
18  
19  
20  
21  
22  
23  
24  
25  
26  
27  
28  
29  
30  
31  
32  
33  
34  
35  
36  
37  
38  
39  
40  
41  
42  
43  
44  
45  
46  
47  
48  
49  
50  
51  
52  
53  
54  
55  
56  
57  
58  
59  
60

3. If your partner agrees to participate in the study, he will be randomized to one of three interventions. We will do the randomization together with him so he can see exactly what intervention he will be offered. The potential interventions are:

- 1) Standard of care where providers may send him reminders about the benefits of health services.
- 2) Motivational Interviewing where he can talk to someone about his life, challenges he faces, and strategies to make his life better and additional services as needed.
- 3) Home-based health services whereby a provider will offer him HIV services and NCD screening at your home as a one-time event. He will then be visited after 4-weeks to be escorted to the clinic if desired.

Regardless of what arm your partner is randomized to, he can always refuse health services or refuse talking to a health care provider and still remain in the study. You can remain in the study regardless of what your partner does.

4. Finally, you may be randomly selected to within 6-months of the study to complete a 1-hour in-depth interview so we can learn more about your experiences in the study. Not all participants will be contacted for the interview and you always have the right to decline an in-depth interview – refusal will not affect your participation in the larger study.

- **How long will you be in the research study?**

All study activities will be completed within 6-months of today.

- **Are there any potential risks or discomforts that you can expect from this study?**

You will be asked a series of questions by a research assistant about your sexual relationship and your perceptions of your partners use of HIV and other health services. We will NEVER disclose your HIV status to your partner. We will NEVER disclose to your partner that you told us he had tested HIV+. However, you may feel uncomfortable answering some questions asked during the interview or you may feel comfortable having your partner in the study. You are able to withdraw from the study at any time. During an interview you can say “I don’t want to answer” to any questions that make you uncomfortable. All questions will be asked in a private place so that no one else will hear your answers.

If you experience distress or adverse events as a result of the study, we will provide you with counseling resources or refer you to resources for assistance.

- **Are there any potential benefits to participating?**

You will have the opportunity to discuss information about your well-being, your relationship with your partner, and HIV services for men with a Research Assistant in a confidential, private manner.

- **Are there any potential benefits to society?**

Information obtained as part of this work may be of benefit to the larger Malawi program, or similar programs in sub-Saharan Africa, since the work aims to determine if there are better ways to offer HIV services to men who use HIV self-test kits. If researchers better understand what

1  
2  
3 type of programs work better for men, the program in Malawi can be scaled up and strengthened  
4 to provide these specific types of increased support.  
5

6 **• Will you receive payment for being part of this study?**

7 Your participation is entirely voluntary. You will be provided MK 7,500 (equivalent to 10USD)  
8 for each survey completed (MK 15,000 / 20USD across the duration of the study). You will  
9 receive the above compensation regardless if you use HIV services or not. Those who complete  
10 the additional in-depth interview 6-months after study enrollment will receive an additional MK  
11 7,500 (equivalent to 10USD) for their time.  
12  
13

14  
15 **• What is the cost of participating in this study?**

16 There is no cost to participate in this study.  
17  
18

19  
20 **• Will information about me be kept confidential?**

21 The study team are the only people who will know about you or any information that you  
22 provide in this study. If necessary to protect your rights or welfare (for example, if you are  
23 injured and need emergency care) or if required by Malawian law, specific information about  
24 you may be made available to providers or officials.  
25

26 Authorized representatives of the Malawi National Health Sciences Research Council who are  
27 responsible for ensuring the rules related to research are followed, may need to review records of  
28 study participants. As a result, they may see your name; but they will not to reveal your identity  
29 to others.  
30

31 When the results of the research are published or discussed in meetings, no information will be  
32 included that would reveal your identity. Any paperwork related to the study which contains  
33 information about you will be kept in a locked cabinet in a locked office. Only staff members of  
34 the study will have access to this information. A code will be assigned to each individual  
35 participating in the study. This code will be stored on a computer in a locked file. The key to  
36 unlock the information will only be known by the research staff. All data entered into a  
37 computer will be entered using this code so information will no longer have any information that  
38 can identify you such as your name. Forms containing any identifying information will be  
39 destroyed two years after the study is finished.  
40  
41  
42

43 **• Participation and Withdrawal**

44 Your participation in this research is VOLUNTARY. If you choose not to participate, that will  
45 not affect your relationship with the hospital, your health provider or health centre you usually  
46 get your medical care from, or your right to health care. If you decide to participate, you are free  
47 to withdraw your consent and stop your participation at any time and can still receive future  
48 health care at the hospital or health center you go to.  
49  
50

51 **• Withdrawal of Participation by the Investigator**

52 The research investigator may stop your participation in this research if he or she feels this is  
53 best for you. The investigators will make the decision and let you know if it is not possible for  
54 you to continue. The decision may be made to protect your health and safety.  
55  
56  
57  
58  
59  
60

1  
2  
3 • **Who can answer questions I might have about this study?**  
4

5 In the event of a research related injury or if you experience a problem, please immediately  
6 return to the hospital or health centre you go to or contact Khumbo Phiri. The NHSRC Ministry  
7 of Health information (Dr. Mitambo) is also provided in case you have questions about your  
8 rights as a research participant.  
9

10 Kusiyitsidwa kutenga nawo mbali mu kafukufuku ndi wakafukufuku

11 Anthu opangitsa kafukufukuyu akhonza kukuletsani kutenga nawo mbali mukafukufukuyu  
12 akaona kuti ndi bwino kuti mutero. Anthu akafukufukuwa azapanga chiganizochi  
13 ndikukudziwitsani kuti sizitheka kuti mupitirize. Chiganizochi chitha kupangidwa kuti ateteze  
14 thanzi ndi chitetezo chanu.  
15

16 Investigator

17 Khumbo Phiri

18 Mobile: +265999840946

19 Partners in Hope Clinic

20 Area 36, Plot8

21 M1 Road South

22 Lilongwe, Malawi  
23  
24

25 OR

26 Dr.C. Mitambo

27 The Secretariate, NHSRC

28 Ministry of Health

29 P.O Box 30377

30 Lilongwe 3

31 Cell +265888344 443  
32  
33  
34  
35

36 **SIGNATURE OF RESEARCH SUBJECT [OR LEGAL REPRESENTATIVE]**  
37

38 I have read (or someone has read to me) the information provided above. I have been given an  
39 opportunity to ask questions and all of my questions have been answered to my satisfaction. I have been  
40 given a copy of this form.  
41

42 Ndawerenga (kapena munthu wina wandiwerengera) zonse zalembedwa mwambamu. Ndapatsidwa  
43 mwayi wofunsa mafunso ndi mafunso onse ndinafunsa ayankhidwa ndipo ndakhutusidwa. Ndapatsidwa  
44 pepala ina yangati yomweyi.  
45

46 **BY SIGNING THIS FORM, I WILLINGLY AGREE TO PARTICIPATE IN THE RESEARCH:**  
47

48 \_\_\_\_\_  
49  
50 Name of Subject  
51

52 \_\_\_\_\_  
53  
54 Name of Legal Representative (if applicable)  
55  
56  
57  
58  
59  
60

Fingerprint

1  
2  
3  
4  
5  
6  
7  
8  
9  
10  
11  
12  
13  
14  
15  
16  
17  
18  
19  
20  
21  
22  
23  
24  
25  
26  
27  
28  
29  
30  
31  
32  
33  
34  
35  
36  
37  
38  
39  
40  
41  
42  
43  
44  
45  
46  
47  
48  
49  
50  
51  
52  
53  
54  
55  
56  
57  
58  
59  
60

DATE (DAY/MO/YR): \_\_\_\_\_

\_\_\_\_\_  
Signature of Subject or Legal Representative  
(may place an X OR fingerprint if unable to sign)

**SIGNATURE OF INVESTIGATOR OR DESIGNEE**

I have explained the research to the subject or his/her legal representative and answered all of his/her questions. I believe that he/she understands the information described in this document and freely consents to participate.

\_\_\_\_\_  
Name of Investigator or Designee

\_\_\_\_\_                      \_\_\_\_\_  
Signature of Investigator or Designee                      Date (must be the same as subject's)

---

**WRITTEN INFORMED CONSENT**  
**Identifying efficient linkage strategies for HIV self-testing (IDEaL)**  
 Female (Chichewa)

---

Mukufunsidwa kuti mutenge nawo mbali mu gawo lino la kafukufuku wotchchedwa”kupeza njira zoyenera zobwezeletsa anthu pa thandizo la ma ARV” amene akupangidwa ndi bungwe la Partners In Hope-EQUIP polojekiti ndi sukulu ya ukachenjede ya University of California Los Angeles yaku Amerika. Mukufunsidwa kuti mutenge nawo mbali mu gawo lakafukufukuyu chifukwa bwenzi lanu lalimuna linapezeka ndi kachiroambo ka HIV pogwiritsa ntchito kachida koziyezela wekha HIV. Kutenga nawo mbali mukafukufuku ameneyi sikokakamiza. Tikuwerengerani uthenga omwe walembedwa pansipa, ndipo muli oloedwa kufunsa mafunso aliwonse pa zomwe simukumvetsetsa, musanapange chiganizo chotenga nawo mbali kapena ayi. *Ine ngati othandizira mukafufuku ameneyu ndikuthandizani pa ndondomeko yotenga chilolezo.*

• **Chifukwa chiyani kafukufukuyu akuchitika?**

Kuziyeza wekha HIV ndi kofunika kwa anthu omwe akufuna kudziwa za momwe mthupi mwawo mulili ku mbali ya HIV koma sapita kuchipatala, kotelo, ndikovuta kwa anthu omwe apezeka ndi HIV kudzela chipangizo choziyezela wekha kuti apeze thandizo la zaumoyo. Akafukufuku akufuna apeze njira zabwino zomwe zingathe kuthandiza azibambo omwe apezeka ndi HIV kuti agwiritse ntchito thandizo lina lazaumoyo ngati angakonde kutero. Kafukufukuyu apeleka mwayi wa njira zosiyana siyana zothandizira HIV kuti aone zomwe zingagwire ntchito bwino kwa azibambo omwe amagwiritsa ntchito ka chida koziyezela wekha HIV.

• **Chichitike ndi chani mukatenga nawo mbali mu kafukufukuyu?**

Pali ma gawo angapo omwe adzachitike mukafukuku, Ngati mungazipereke kutenga nawo mbali mu kafukufukuyu mudzatenga nawo mbali mu magawo otsatirawa:

1. Mundilole kuti ndifufuze bwenzi lanu lalimuna kapena ndipelekezeni kwa bwenzi lanu lalimuna ndi cholinga choti nalonso litenge nawo gawo mu kafukufuku. Chidziwitso: muli omasuka kutenga nawo mbali mu kafukufu ngati bwenzi lanu lakana kutenga nawo mbali kapena mukuganiza kuti bwenzi lanu likana.
2. Pamapepo pa kucheza koyamba komanso kachiwiri othandiza kafukufuku ngati ine ndidzacheza nanu ndikufunsi mafunso okhuza inuyo, kuphatikizapo ngati muli pa banja, muli ndi abwenzi ogonana nawo angati, maphunziro anu komanso zomwe munakumana nazo polandira thandizo la HIV komanso momwe mumnvera kumbali ya thandizo la HIV angakhalenso kuyezedwa HIV. Tikufunsi mafunso lelo (Ngati lelo muli okonzeka kuyankha mafunsi) komanso miyezi inayi ikudzayi kuti tiwone ngati pali chomwe chasintha, kucheza kuli konse kuzitenga nthawi yosachepela makumi anayi ndi isanu. Muli oloedwa kukana kutenga nawo mbali mu kucheza kotsatira nthawi iliyonse.
3. Ngati bwenzi lanu lidzatenge nawo mbali mu study, adzaikidwa mu gulu limodzi mwa magulu atatu mwa mayere. Tidzachita mayere limodzi ndi bwenzi lanu kuti awone kuti ali ‘gulu liti mwa magulu atatuwa. Maguluwa ali motere:

- 1) Chikumbutso cha ubwino wa thandizo la zaumoyo
- 2) Kucheza kwa chilimbitso komwe mungathe ndi mwayi ocheza ndi anthu ena ndi kuwafotokozela za umoyo wanu, zofuta zomwe mumakumana nazo komanso njira zomwe mumagwiritsa ntchito kuti moyo wanu ukhale wosavuta.
- 3) Thandizo la zaumoyo lomwe mumatha kulandira pakhomo monga thandizo la HIV komanso NCD lomwe mumalandila kamodzi. Pakatha masaba anayi mudzayendeledwa ndi wa zaumoyo yemwe adzakupelekezeni ku chipatala komwe mukapitilize kulandira thandizo ngati mwakonda kutelo.

Posatengera njira yomwe mwapatsidwa mongathe kukana kulandira thandizo la zaumoyo koma ndikupitiliza kutenga nawo mbali mu kafukufuku ndipo tingathe kupitilizabe kucheza komwe tatchula m' mwambamu.

4. Pamapeto tidzakuyendelani pakutha kwa miyezi isanu ndi umodzi ya kafukufuku kuti tidzacheze nanu komanso kuti tidzanve za momwe mukunvera za kafukufuku, maganizo anu okhudza njira zina za mtsogolo komanso, thandizo lina lowonjezera ngati ilipo. Si onse otenga nawo mbali omwe adzaonedwe ndipo muli oloedwa kukana kutenga nawo mbali mukucheza ndipo kukana kwanu sikudzaononga mwayi wanu otenga nawo mbali mu study.

- **Mutenga nthawi yaitali bwanji muli mukafukufuku?**

Zochitika zonse zakafukufuku zizamalizidwa mu miyezi isanu ndi imodzi.

- **Pali zinthu zosowetsa mtendere kapena zodetsa nkhwana zomwe mungayembekezere kuchokera mu kafukufukuyu?**

Mufunsidwa mafunso angapo ndi opangitsa kafukufuku okhudza maubwenzi anu ogonana komanso maganizo anu pa momwe abwenzi anu amagwiritsira thandizo la HIV ndi mathandizo ena a zaumoyo. SITIDZAULULA momwe mthupi mwanu muliri kumbali ya kachilombo ka HIV kwa bwenzi lanu. SITIDZAULURA kwa bwenzi lanu kuti munatiuza kuti ali ndi kachilombo ka HIV. Ngakhale zili choncho, mukhoza kusamasuka kuyankha mafunso ena mu kafukufuku kapenanso mukhoza kufuna kuti bwenzi lanu likhale nanu poyankha mafunsowa. Muli ndi ufulu osiya kutenga nawo gawo mu kafukufuku nthawi iliyonse. Mkati mwa kucheza kwathu, mukhoza kunena kuti “Sindikufuna kuyankha” ku funso lililonse lomwe sindinu omasuka kuyankha. Mafunso onse afunsidwa malo oduka mphepo kuti munthu wina aliyense asamve mayankho anu.

Ngati mungapeze mavuto kapena nkhwana mu mtima kamba kotenga nawo gawo mu kafukufukuyu, tikupatsani uphungu oyenera kapena kukulozerani koyenera kupeza thandizo.

- **Pali cholowa chilichonse potenga nawo mbali mukafukufukuyu?**

Mudzakhala ndi mwayi okambilana ndikunva zambiri zokhudza moyo wanu komanso thandizo la HIV ndi othandiza kafukufuku komanso dotolo munjira yachinsisi. Mudzakhalanso ndi mwayi oyamba mankhwala a ma ARV ku chipatala cha kufuna kwanu.

- **Pali cholowa chilichonse kwa anthu a mudera?**

Uthenga womwe udzatengedwe ngati mbali imodzi yakafukufukuyu uzakhala othandiza mu mapologalamu a dziko la Malawi, kapena ma pologalamu ena ofananirapo a kum' mwera kwa Africa, chifukwa choti ntchito imeneyi ikufuna kuona ngati pali njira yabwino yopeleka thandizo la HIV mwa



1  
2  
3 azibambo, ma pologalamu aku Malawi azapita patsogolo ndikulimbikitsa njira zopititsira patsogolo.  
4  
5

6  
7 **• Kodi mulandira malipiro potenga nawo mbali mukafukufukuyu?**

8 Kutenga nawo mbali kosakakamiza. Mudzalandira chiongola dzanja cha ndalama zokwana  
9 7,500(Pafupifupi MK 15,000/20USD). Mudzalandira ndalamazi olo mutakhala kuti simunatenge nawo  
10 kapena mwatenga nawo mbali mu thandizo la HIV. Kwa omwe adzamalize nawo kucheza  
11 kowonjezera patatha miyezi isanu ndi umodzi adzalandira ndalama yowonjezera yokwana MK 7,500  
12 (yokwana pafupi fupi 10 USD0 chifukwa cha nthawi yawo.  
13  
14

15  
16 **• Kodi pali kulipira kulikonse chifukwa chotenga nawo mbali mukafukufukuyu?**

17 Kutenga nawo mbali mukafukufukuyu ndi kwaulere.  
18  
19

20  
21 **• Kodi uthenga wanga uzasungidwa mwa chinsinsi?**

22 Anthu ogwira nawo ntchito mu kafukufuku okhawo ndi amene adziwe za uthenga wanu kapena  
23 chilichonse chomwe mutiuze pa kafukufukuyu.

24 Anthu ovomerezeka oyimirira bungwe la National Health Sciences Research Council ndi UCLA office  
25 for Protection Of Research Subjects ndi amene ali ndi udindo wootsetsa kuti malamulo a  
26 kafukufuku akutsatidwa, akhoza kufuna kuona nawo kaundula wa anthu amene akutenga nawo mbali  
27 mukafukufukuyu. Kutanthauza kuti akhonza kuzaona dzina lanu; koma sangaulure zokhuza inu kwa  
28 anthu ena.  
29

30 Pa nthawi imene zotsatira za kafukufukuyu zidzatsindikidwa kapena kukambidwa mu misonkhano,  
31 palibe uthenga womwe udzayikidwe wokuzindikiritsani. Uthenga uliwonse wolembedwa pa pepala  
32 wokhunza inu uzasungidwa mu kabati yokhoma mu ofesi yokhomanso. Anthu ogwira nawo ntchito  
33 mukafukufukuyu okhawo ndi amene azathe kuona uthenga umenewu. Njira yotanthauzira uthenga  
34 umenewu izadziwika ndi anthu akafukufukuyu basi. Uthenga onse olowetsedwa pa makina a  
35 kompyuta uzalowetsedwa kugwiritsa ntchito nambala, ndekuti uthenga onse sudzakhalanso ndi  
36 zokuzindikiritsani monga dzina lanu. Ma pepala amene pali uthenga okuzindikitsani adzawonongedwa  
37 pakapita zaka ziwiri chimalizireni kafukufukuyu.  
38  
39

40  
41 **• Kutenga mbali ndi kusiya kutenga mbali**

42 Kutenga nawo mbali mu kafukufukuyu SIKOKAKAMIZA. Ngati musankhe kuti simutenga nawo  
43 mbali, izi sizingasokoneze ubale wanu ndi chipatala chino, anthu ogwira ntchito kuchipatala, kapena  
44 chipatala chomwe mumalandilirako chithandizo, kapena ufulu wanu wolandira thandizo la chipatala.  
45 Ngati mwapanga chisankho chotenga nawo mbali, mukhoza kuchosa chilolezo chanu ndikusiya  
46 kutenga nawo mbali nthawi ina iliyonse ndipo mungathe kuzalandirabe chithandizo pa chipatala pano  
47 mtsogolo.  
48  
49

50  
51 **• Kusiyitsidwa kutenga nawo mbali mu kafukufuku ndi wakafukufuku**

52 Anthu opangitsa kafukufukuyu akhonza kukuletsani kutenga nawo mbali mukafukufukuyu akaona kuti  
53 ndi bwino kuti mutero. Anthu akafukufukuwa azapanga chiganizochi ndikukudziwitsani kuti sizitheka  
54 kuti mupitirize. Chiganizochi chitha kupangidwa kuti ateteze thanzi ndi chitetezo chanu.  
55  
56  
57  
58  
59  
60



1  
2  
3 • **Angayankhe ndi ndani mafunso amene ndingakhale nawo wokhuza kafukufukuyu?**  
4

5 Zitachitika kuti mwavulala kamba ka kafukufukuyu kapena mukukumana ndi vuto, chonde bwelerani  
6 mwachangu kuchipatala chomwe munapitako kapena lumikizanani ndi Mike Nyirenda. Bungwe la  
7 NHSRC Ministry of Health information kudzera mwa Dr Kathyola liliponso ngati mungakhale ndi  
8 mafunso okhudza ufulu wanu ngati munthu wotenga nawo mbali mu kafukufuku.  
9

10  
11 Investigator  
12 Khumbo Phiri  
13 Mobile: +265999840946  
14 Partners in Hope Clinic  
15 Area 36, Plot8  
16 M1 Road South  
17 Lilongwe, Malawi  
18

19  
20 OR

21 Dr.C. Mitambo  
22 The Secretariate, NHSRC  
23 Ministry of Health  
24 P.O Box 30377  
25 Lilongwe 3  
26 Cell +265888344 443  
27  
28  
29

30 **SAYINI YA OTENGA NAWO MBALI [KAPENA YA OYIMIRA OTENGA NAWO MBALI]**  
31

32 Ndawerenga (kapena munthu wina wandiwerengera) zonse zalembedwa mwambamu. Ndapatsidwa  
33 mwayi wofunsa mafunso ndi mafunso onse ndinafunsa ayankhidwa ndipo ndakhutusidwa.  
34 Ndapasidwa pepala ina yangati yomweyi.  
35

36 POSAYINA PA PEPALALI, NDIKUVOMERA MOSAKAKAMIZIDWA KUTENGA NAWO  
37 MBARI MU KAFUKUFUKU:  
38  
39

40 \_\_\_\_\_  
41 Name of Subject  
42  
43

44 \_\_\_\_\_  
45 Name of Legal Representative (if applicable)  
46  
47

48  
49  
50  
51  
52  
53  
54  
55  
56  
57  
58  
59  
60

Fingerprint

DATE (DAY/MO/YR): \_\_\_\_\_

Signature of Subject or Legal Representative

(may place an X OR fingerprint if unable to sign)

**SAYINI YA OFUNSA MAFUNSO**

Ndamufotokozero otenga nawo mbali/oyimirira otenga nawo mbali za kafukufukuyu ndipo ndayankha mafunso onse amene anali nawo. Ndikukhulupirira kuti amvetsetsa uthenga onse omwe uli chikalata cha uthengawu ndipo avomera kutenga nawo mbali mwa kufuna kwao.

\_\_\_\_\_

Dzina la ofunsa mafunso kapena oyimira akafukufuku

\_\_\_\_\_

Sayini ya ofunsa mafunso kapena oyimira akafukufuku

\_\_\_\_\_

Date (must be the same as subject's)

#### 14.4.APPENDIX D: Written Informed Consent – Male

---

### WRITTEN INFORMED CONSENT

#### Identifying efficient linkage strategies for HIV self-testing (IDEaL)

##### Male

---

You are asked to participate in a research study entitled “*Identifying efficient linkages strategies for HIVST*” conducted by Partners in Hope and the University of California Los Angeles in the United States. You are being requested to take part in the study because you recently received a self-test kit and reported recently testing HIV-positive. Your participation in this study is entirely voluntary. You will be read the information below, and you are free to ask questions about anything you do not understand, before deciding whether or not to participate. *I as the field assistant for this study will take you through this consenting process.*

- **Why is this study being done?**

HIV self-testing is very helpful for people who want to know their status but do not usually go to the health facility. However, it can be hard for individuals who test HIV-positive with HIV self-testing to be able to access other health services. Researchers want to determine what are the best interventions that can help men who are diagnosed with HIV use other health services, if desired. The study will offer several different strategies for HIV services to see what works best for men who use HIV self-testing kits.

- **What will happen if you take part in this research study?**

There are several steps to this study. If you volunteer to participate in this study you will have the opportunity to participate in the following components:

1. Complete two study visits where a research assistant like myself will interview you and ask you information about yourself, including whether you are married, number of sexual partners, your level of education, information about your experiences with HIV services, and how you feel about HIV testing and treatment services. We will ask you questions today (or a day that is convenient for you) and in four months in order to see if anything has changed. Each interview will last about 45minutes. You can refuse a follow-up survey at any point.
2. After completing the first interview you will be randomized to one of three interventions. We will do the randomization together so you can see exactly what you will be offered. Based on what intervention you are randomly selected for, you will also be offered a variety of health services from health facility staff. The potential interventions are:
  - a) Reminders about the benefits of health services;
  - b) Motivational Interviewing where you can talk to someone about your life, challenges you face, and strategies to make your life and better, and additional services as needed
  - c) Home-based health services whereby a provider will offer you HIV services and NCD screening at your home as a one-time event. After four weeks, you will be visited by a health care worker who will escort you to the clinic for continued health services if desired.

Regardless of what arm you are randomized to, you can always refuse health services or refuse talking to a health care provider and still remain in the study. Even if you do not plan to use any additional

1  
2  
3 health services, don't worry, you can still be in the study and we can still complete the interviews we  
4 discussed above.

- 5  
6 3. In the first 6 months of the study, we will also review medical records at your local health facility to  
7 see if you visited the health facility since enrolling in the study. This does not require interaction  
8 with you and will be completely confidential.
- 9  
10 4. Finally, we may contact you within 6-months of the study to complete another in-depth interview so we  
11 can learn more about your experience with the study, recommendations for future interventions, and  
12 what additional services, if any, you would like. Not all participants will be contacted for the  
13 interview and you always have the right to decline an in-depth interview – refusal will not affect  
14 your participation in the larger study.

15  
16 • **How long will you be in the research study?**

17  
18 All study activities will be completed within 6-months of today.

19  
20 • **Are there any potential risks or discomforts that you can expect from this study?**

21 You will be asked a series of questions by a research assistant about your sexual history and your  
22 experience receiving and using a self-test kit from your sexual partner. You may feel uncomfortable  
23 answering some of the questions asked by the interviewer. You can say “I don't want to answer” to any  
24 questions that make you uncomfortable. All questions will be asked in a private place so that no other  
25 patients or staff will hear your answers.

26  
27 If you agree to participate in the assigned intervention, providers may ask to reach you at home or in the  
28 community. As with any health service, if you choose to initiate ART you may be at risk of unwanted  
29 status disclosure.

30  
31 If you experience distress or adverse events, we will provide you with counseling resources or refer you  
32 to resources for assistance.

33  
34 • **Are there any potential benefits to participating?**

35 You will have the opportunity to discuss information about your well-being and HIV services with a  
36 Research Assistant and possibly a health care provider and in a confidential, private manner. You will  
37 also have the chance to link to HIV care services at the facility of your choosing.

38  
39 • **Are there any potential benefits to society?**

40 Information obtained as part of this work may be of benefit to the larger Malawi program, or similar  
41 programs in sub-Saharan Africa, since the work aims to determine if there are better ways to offer HIV  
42 services to men who use HIV self-test kits. If researchers better understand what type of programs work  
43 better for men, the program in Malawi can be scaled up and strengthened to provide these specific types  
44 of increased support.

45  
46 • **Will you receive payment for being part of this study?**

47 Your participation is entirely voluntary. You will be provided MK 7,500 (equivalent to 10USD) for each  
48 survey completed (MK 15,000 / 20USD across the duration of the study). You will receive the above  
49 compensation regardless if you use HIV services or not. Those who complete the additional in-depth  
50 interview 6-months after study enrollment will receive an additional MK 7,500 (equivalent to 10USD) for  
51 their time.

52  
53 • **What is the cost of participating in this study?**

54 There is no cost to participate in this study.

55  
56  
57  
58  
59  
60

1  
2  
3  
4  
5 • **Will information about me be kept confidential?**

6 Authorized representatives of the Malawi National Health Sciences Research Council who are responsible  
7 for ensuring the rules related to research are followed, may need to review records of study participants.  
8 As a result, they may see your name; but they will not to reveal your identity to others.  
9

10 When the results of the research are published or discussed in meetings, no information will be included  
11 that would reveal your identity. Any paperwork related to the study which contains information about you  
12 will be kept in a locked cabinet in a locked office. Only staff members of the study will have access to  
13 this information. A code will be assigned to each individual participating in the study. This code will be  
14 stored on a computer in a locked file. The key to unlock the information will only be known by the  
15 research staff. All data entered into a computer will be entered using this code so information will no  
16 longer have any information that can identify you such as your name. Forms containing any identifying  
17 information will be destroyed two years after the study is finished.  
18

19 • **Participation and Withdrawal**

20 Your participation in this research is VOLUNTARY. If you choose not to participate, that will not affect  
21 your relationship with the hospital, your health provider or health centre you usually get your medical  
22 care from, or your right to health care. If you decide to participate, you are free to withdraw your consent  
23 and stop your participation at any time and can still receive future health care at the hospital or health  
24 center you go to.  
25

26 • **Withdrawal of Participation by the Investigator**

27 The research investigator may stop your participation in this research if he or she feels this is best for you.  
28 The investigators will make the decision and let you know if it is not possible for you to continue. The  
29 decision may be made to protect your health and safety.  
30

31 • **Who can answer questions I might have about this study?**

32 In the event of a research related injury or if you experience a problem, please immediately return to the  
33 hospital or health centre you go to or contact Mike Nyirenda. The NHSRC Ministry of Health  
34 information (Dr. Kathyola) is also provided in case you have questions about your rights as a research  
35 participant.  
36

37 Investigator:

38 Khumbo Phiri  
39 Mobile: +265999840946  
40 Partners in Hope Clinic  
41 Area 36, Plot8  
42 M1 Road South  
43 Lilongwe, Malawi  
44

45 OR

46 Dr.C. Mitambo  
47 The Secretariate, NHSRC  
48 Ministry of Health  
49 P.O Box 30377  
50 Lilongwe 3  
51 Cell +265888344 443  
52  
53  
54  
55  
56  
57  
58  
59  
60

**SIGNATURE OF RESEARCH SUBJECT [OR LEGAL REPRESENTATIVE]**

I have read (or someone has read to me) the information provided above. I have been given an opportunity to ask questions and all of my questions have been answered to my satisfaction. I have been given a copy of this form.

**BY SIGNING THIS FORM, I WILLINGLY AGREE TO PARTICIPATE IN THE RESEARCH:**

\_\_\_\_\_  
Name of Subject

\_\_\_\_\_  
Name of Legal Representative (if applicable)

\_\_\_\_\_  
DATE (DAY/MO/YR): \_\_\_\_\_

\_\_\_\_\_  
Signature of Subject or Legal Representative  
(may place an X OR fingerprint if unable to sign)

**SIGNATURE OF INVESTIGATOR OR DESIGNEE**

I have explained the research to the subject or his/her legal representative and answered all of his/her questions. I believe that he/she understands the information described in this document and freely consents to participate.

\_\_\_\_\_  
Name of Investigator or Designee

\_\_\_\_\_  
Signature of Investigator or Designee

\_\_\_\_\_  
Date (must be the same as subject's)

---

**WRITTEN INFORMED CONSENT**  
**Identifying efficient linkage strategies for HIV self-testing (IDEaL)**  
 Male (Chichewa)

---

Mukufunsidwa kuti mutenge nawo mbali mu gawo lino la kafukufuku wotchedwa”kupeza njira zoyenera zobwezeletsa anthu pa thandizo la ma ARV” amene akupangidwa ndi bungwe la Partners In Hope-EQUIP polojekiti ndi sukulu ya ukachenjeda ya University of California Los Angeles yaku Amerika. Mukufunsidwa kuti mutenge nawo mbali mu gawo lakafukufukuyu chifukwa muli ndi kachirokoma ka HIV komanso mwalandila kachipangizo koziyezela wekha HIVi. Kutenga nawo mbali mukafukufuku ameneyi sikokakamiza. Tikuwerengerani uthenga omwe walembedwa pansipa, ndipo muli oloedwa kufunsa mafunso aliwonse pa zomwe simukumvetsetsa, musanapange chiganizo chotenga nawo mbali kapena ayi. Ine ngati othandizira mukafufuku ameneyu ndikuthandizani pa ndondomeko yotenga chilolezo.\*

**Chifukwa chiyani kafukufukuyu akuchitika?**

Kuziyeza wekha HIV ndi kofunika kwa anthu omwe akufuna kudziwa za momwe mthupi mwawo mulili ku mbali ya HIV koma sapita kuchipatala, kotelo, ndikovuta kwa anthu omwe apezeka ndi HIV kudzela chipangizo choziyezela wekha kuti apeze thandizo la zaumoyo. Akafukufuku akufuna apeze njira zabwino zomwe zingathe kuthandiza azibambo omwe apezeka ndi HIV kuti agwiritse ntchito thandizo lina lazaumoyo ngati angakonde kutero. Kafukufukuyu apeleka mwayi wa njira zosiyana siyana zothandizira HIV kuti aone zomwe zingagwire ntchito bwino kwa azibambo omwe amagwiritsa ntchito ka chida koziyezela wekha HIV.

**Chichitike ndi chani mukatenga nawo mbali mu kafukufukuyu?**

Pali ma gawo angapo omwe adzachitike mukafukuku, Ngati mungazipereke kutenga nawo mbali mu kafukufukuyu mudzatenga nawo mbali mu magawo otsatirawa:

- Akafukufuku adzakuyendera kawiri. Ulendo woyamba tidzapemphani kuti mutenge nawo mbali mu kafukufuku yemwe tidzakufunsi zokhuza inuyo, kuphatikizapo ngati muli pa banja, muli ndi abwenzi ogonana nawo angati, maphunziro anu komanso zomwe munakumana nazo polandira thandizo la HIV komanso momwe mumvera kumbali ya thandizo la HIV angakhale kuyezedwa HIV. Tikufunsani mafunso lelo (Ngati lelo muli okonzeka kuyankha mafunso) komanso miyezi inayi ikudzayi kuti tiwone ngati pali chomwe chasintha, kucheza kuli konse kuzitenga nthawi yosachepela makumi anayi ndi isanu. Muli oloedwa kukana kutenga nawo mbali mu kucheza kotsatira nthawi iliyonse.
2. Pamapepo pa kucheza koyamba mudzayikidwa mu imodzi mwa njira zitatatu popanda ndondomeko iliyonse, pa nthawi yomwe mudzakhale mukuyikidwa mu njirayi mudzakhala muli pomwepo kuti muone njira yomwe mwapatsidwa. Potengera njira yomwe mwayikidwa mudzapatsidwanso mwayi wa mathandizo a zaumoyo angapo ochoka kwa opeleka thandizo la zaumoyo pa chiptala, zina mwa njira ndi:

- a) Chikumbutso cha ubwino wa thandizo la zaumoyo



- 1  
2  
3 b) Kucheza kwa chilimbitso komwe mungathe ndi mwayi ocheza ndi anthu ena ndi  
4 kuwafotokozela za umoyo wanu, zofuta zomwe mumakumana nazo komanso njira zomwe  
5 mumagwiritsa ntchito kuti moyo wanu ukhale wosavuta.  
6  
7 c) Thandizo la zaumoyo lomwe mumatha kulandira pakhomu monga thandizo la HIV  
8 komanso NCD lomwe mumalandila kamodzi. Pakatha masaba anayi mudzayendeledwa ndi  
9 wa zaumoyo yemwe adzakupelekezeni ku chipatala komwe mukapitilize kulandira  
10 thandizo ngati mwakonda kutelo.

11 Posatengera njira yomwe mwapatsidwa mongathe kukana kulandira thandizo la zaumoyo koma  
12 ndikupitiliza kutenga nawo mbali mu kafukufuku ndipo tingathe kupitilizabe kucheza komwe  
13 tatchula m'mwambamu.

14  
15 3. Miyezi isanu ndi umodzi yoyambilira ya kafukufuku tidzaona zambiri ya umoyo wanu ku chipatala cha  
16 m'dela lanu ngati munapitako mutalowa kale mu kafukufuku, zimenezi sizidzafuika kulankhula  
17 nanu ndipo zidzachitika mwachinsinsi.

18 4. Pamapeto tidzakuyendelani pakutha kwa miyezi isanu ndi umodzi ya kafukufuku kuti tidzacheze nanu  
19 komanso kuti tidzanve za momwe mukunvera za kafukufuku, maganizo anu okhudza njira zina za  
20 mtsogolo komanso, thandizo lina lowonjezera ngati ilipo. Si onse otenga nawo mbali omwe  
21 adzaonedwe ndipo muli oloedwa kukana kutenga nawo mbali mukucheza ndipo kukana kwanu  
22 sikudzaononga mwayi wanu otenga nawo mbali mu study.  
23

#### 24 **Mutenga nthawi yaitali bwanji muli mukafukufuku?**

25  
26 Zochitika zonse zakafukufuku zizamalizidwa pa miyezi isanu ndi umodzi (6) kuchokera lero.  
27  
28

#### 29 **Pali zinthu zosowetsa mtendere kapena zodetsa nkhwawa zomwe mungayembekezere kuchokera mu** 30 **kafukufukuyu?**

31  
32 Muzafunsidwa mndandanda wa mafunso ndi othandizira mukafukufuku ameneyi zokhuza mbiri yanu  
33 pankhani zogonana ndi zochitika mutalandira ka chida koziyeza wekha kuchokera kwa bwezi wanu  
34 ogonana naye komanso mmene munagwiritsira ntchito. Mutha kukhala osamasuka poyankha mafunso ena  
35 omwe wofunsa mafunso angafunse. Mutha kunena kuti “sindikufuna kuyankha” kufunso lilironse lomwe  
36 simukumasuka nalo. Mafunso onse azafunsidwa pa malo achinsinsi pomwe odwala anzanu kapena  
37 ogwira ntchito pachipatala sadzamva nawo mayankho anu.  
38

39 Ngati mudzavomere kutenga nawo mbali mu imodzi mwa njira, a zaumoyo adzakufunsani kuti akupezeni  
40 kunyumba kwanu kapena mu dela lanu. Monga mwa thandizo lililonse la zaumoyo, ngati mungavomere  
41 kuyamba kumwa mankhwala a ma ARV mungathe kukhala pa chiospyezo choulula za momwe mulili  
42 m'mthupi mwano mosafuna.

43 Ngati mungakumane ndi masautso aliwonse, tidzakupatsani uphungu kapena kukutumizani koti  
44 mukathandizidwe ndi uphungu.  
45  
46

#### 47 **Pali cholowa chilichonse potenga nawo mbali mukafukufukuyu?**

48  
49 Mudzakhala ndi mwayi okambilana ndikunva zambiri zokhudza moyo wanu komanso thandizo la HIV  
50 ndi othandiza kafukufuku komanso dotolo munjira yachinsisi. Mudzakhalanso ndi mwayi oyamba  
51 mankhwala a ma ARV ku chipatala cha kufuna kwanu.  
52  
53

#### 54 **Pali cholowa chilichonse kwa anthu a mudera?**



1  
2  
3 Uthenga womwe udzatengedwe ngati mbali imodzi yakafukufukuyu uzakhala othandiza mu  
4 mapologalamu a dziko la Malawi, kapena ma pologalamu ena ofananirapo a kum'mwera kwa Africa,  
5 chifukwa choti ntchito imeneyi ikufuna kuona ngati pali njira yabwino yopeleka thandizo la HIV mwa  
6 azibambo, ma pologalamu aku Malawi azapita patsogolo ndikulimbikitsa njira zopititsira patsogolo.  
7

### 8 9 **Kodi mulandira malipiro potenga nawo mbali mukafukufukuyu?**

10  
11 Kutenga nawo mbali kosakakamiza. Mudzalandira chiongola dzanja cha ndalama zokwana  
12 7,500(Pafupifupi MK 15,000/20USD). Mudzalandira ndalamazi olo mutakhala kuti simunatenge nawo  
13 kapena mwatenga nawo mbali mu thandizo la HIV. Kwa omwe adzamalize nawo kucheza kowonjezera  
14 patatha miyezi isanu ndi umodzi adzalandira ndalama yowonjezera yokwana MK 7,500 (yokwana pafupi  
15 fupi 10 USD0 chifukwa cha nthawi yawo.  
16  
17

### 18 **Kodi pali kulipira kulikonse chifukwa chotenga nawo mbali mukafukufukuyu?**

19  
20 Kutenga nawo mbali mukafukufukuyu ndi kwaulere.  
21  
22

### 23 **Kodi uthenga wanga uzasungidwa mwa chinsinsi?**

24  
25 Anthu ogwira nawo ntchito mu kafukufuku okhawa ndi amene adziwe za uthenga wanu kapena  
26 chilichonse chomwe mutiuze pa kafukufukuyu.

27  
28 Anthu ovomerezeka oyimirira bungwe la National Health Sciences Research Council ndi UCLA office  
29 for Protection Of Research Subjects ndi amene ali ndi udindo woonetsesa kuti malamulo a kafukufuku  
30 akutsatidwa, akhoza kufuna kuona nawo kaundula wa anthu amene akutenga nawo mbali  
31 mukafukufukuyu. Kutanthauza kuti akhonza kuzaona dzina lanu; koma sangaulure zokhuza inu kwa  
32 anthu ena.

33  
34 Pa nthawi imene zotsatira za kafukufukuyu zidzatsindikidwa kapena kukambidwa mu misonkhano, palibe  
35 uthenga womwe udzayikidwe wokuzindikiritsani. Uthenga uliwonse wolembedwa pa pepala wokhunza  
36 inu uzasungidwa mu kabati yokhoma mu ofesi yokhomanso. Anthu ogwira nawo ntchito  
37 mukafukufukuyu okhawa ndi amene azathe kuona uthenga umenewu. Njira yotanthauzira uthenga  
38 umenewu izadziwika ndi anthu akafukufukuyu basi. Uthenga onse olowetsedwa pa makina a kompyuta  
39 uzalowetsedwa kugwiritsa ntchito nambala, ndekuti uthenga onse sudzakhanso ndi zokuzindikiritsani  
40 monga dzina lanu. Ma pepala amene pali uthenga okuzindikitsani adzawonongedwa pakapita zaka ziwiri  
41 chimalizireni kafukufukuyu.

42  
43 Kutenga nawo mbali mu kafukufukuyu SIKOKAKAMIZA. Ngati musankhe kuti simutenga nawo mbali,  
44 izi sizingasokoneze ubale wanu ndi chipatala chino, anthu ogwira ntchito kuchipatala, kapena chipatala  
45 chomwe mumalandilirako chithandizo, kapena ufulu wanu wolandira thandizo la chipatala. Ngati  
46 mwapanga chisankho chotenga nawo mbali, mukhoza kuchosa chilolezo chanu ndikusiyi kutenga nawo  
47 mbali nthawi ina iliyonse ndipo mungathe kuzalandirabe chithandizo pa chipatala pano mtsogolo.  
48

### 49 **Kusiuyitsidwa kutenga nawo mbali mu kafukufuku ndi wakafukufuku**

50  
51 Anthu opangitsa kafukufukuyu akhonza kukuletsani kutenga nawo mbali mukafukufukuyu akaona kuti  
52 ndi bwino kuti mutero. Anthu akafukufukuwa azapanga chiganizochi ndikukudziwitsani kuti sizitheka  
53 kuti mupitirize. Chiganizochi chitha kupangidwa kuti ateteze thanzi ndi chitetezo chanu.  
54  
55  
56  
57  
58  
59  
60

**Kusiyitsidwa kutenga nawo mbali mu kafukufuku ndi wakafukufuku**

Anthu opangitsa kafukufukuyu akhonza kukuletsani kutenga nawo mbali mukafukufukuyu akaona kuti ndi bwino kuti mutero. Anthu akafukufukuwa azapanga chiganizochi ndikukudziwitsani kuti sizitheka kuti mupitirize. Chiganizochi chitha kupangidwa kuti ateteze thanzi ndi chitetezo chanu.

Investigator:

Khumbo Phiri  
Mobile: +265999840946  
Partners in Hope Clinic  
Area 36, Plot8  
M1 Road South  
Lilongwe, Malawi

OR

Dr.C. Mitambo  
The Secretariate, NHSRC  
Ministry of Health  
P.O Box 30377  
Lilongwe 3  
Cell +265888344 443

Wotenga mbali kapena omuyimira asayine

*Ndawerenga (kapena munthu wina wandiwerengera) zonse zalembedwa mwambamu. Ndapatsidwa mwayi wofunsa mafunso ndi mafunso onse ndinafunsa ayankhidwa ndipo ndakhutitsidwa. Ndapatsidwa pepala lina langati lomweyi.*

\_\_\_\_\_

Dzina la otenga mbali

\_\_\_\_\_

Dzina la oyimola malamulo

\_\_\_\_\_ Tsiku: \_\_\_\_\_

**Wotenga mbali kapena oyimira malamulo asayine**

**(Mutha kuyika X ngati simungathe kusayinila)**

**Ofufuza asayinire/Kapena othandizila Kafukufuku**

Ndafotokoza za kafukufuku uyu kwa otenga nawo mbali kapena owayimila, ndayankhanso mafunso awo onse. Ndikukhulupilira kuti amvetsetsa zomwe zananedwa mu chikalata ichi

1  
2  
3  
4  
5  
6  
7  
8  
9  
10  
11  
12  
13  
14  
15  
16  
17  
18  
19  
20  
21  
22  
23  
24  
25  
26  
27  
28  
29  
30  
31  
32  
33  
34  
35  
36  
37  
38  
39  
40  
41  
42  
43  
44  
45  
46  
47  
48  
49  
50  
51  
52  
53  
54  
55  
56  
57  
58  
59  
60

ndiponso avomereza mwakufuna kwawo kutenga nawo mbali.

---

Dzina la ofufuza kapena othandizila kafukufuku

---

Ofufuza kapena othandizila kafukufuku asayine apa      Tsiku

For peer review only

## 14.5. APPENDIX E: Baseline Survey – Male

### BASELINE SURVEY Identifying efficient linkage strategies for HIV self-testing (IDEaL) Male

| Question Name                  | Label                                                                                                                                                                                        | Responses                                                                                                                                                                                          |
|--------------------------------|----------------------------------------------------------------------------------------------------------------------------------------------------------------------------------------------|----------------------------------------------------------------------------------------------------------------------------------------------------------------------------------------------------|
| <b>INTRODUCTION SECTION</b>    |                                                                                                                                                                                              |                                                                                                                                                                                                    |
| interviewer                    | Full Name of Interviewer                                                                                                                                                                     |                                                                                                                                                                                                    |
| Interview date                 | Interview date                                                                                                                                                                               |                                                                                                                                                                                                    |
| Time start                     | Time survey started                                                                                                                                                                          |                                                                                                                                                                                                    |
| District                       | District                                                                                                                                                                                     |                                                                                                                                                                                                    |
| TA                             | TA                                                                                                                                                                                           |                                                                                                                                                                                                    |
| village                        | Village                                                                                                                                                                                      |                                                                                                                                                                                                    |
| <b>SECTION A: DEMOGRAPHICS</b> |                                                                                                                                                                                              |                                                                                                                                                                                                    |
| Intro Note                     | Thank you for agreeing to participate.<br>Now I will ask you a few questions about yourself and who you are.<br>Please feel free to answer honestly.<br>There are no right or wrong answers. |                                                                                                                                                                                                    |
| a7                             | What is your tribe?                                                                                                                                                                          | <ol style="list-style-type: none"> <li>1. Lomwe</li> <li>2. Sena</li> <li>3. Chewa</li> <li>4. Mang'anja/Nyanja</li> <li>5. Ngoni</li> <li>6. Tumbuka</li> <li>7. Tonga</li> <li>8. Yao</li> </ol> |

|      |                                                                                                 |                                                                                                                         |
|------|-------------------------------------------------------------------------------------------------|-------------------------------------------------------------------------------------------------------------------------|
|      |                                                                                                 | 99. Other, specify                                                                                                      |
| a3   | What is the highest level of school you attended?                                               | 1. Primary<br>2. Secondary<br>3. Higher                                                                                 |
| a3b  | What class did you complete in your highest level of school?                                    | _____                                                                                                                   |
| a4   | Please think of the past 12 months, how would you describe your primary occupation?             | 1. Working formally (employed full time)<br>2. Working informally (ganyu, farming, business)<br>3. Not working          |
| a5   | Are you currently married?                                                                      | 1. Married<br>2. Live-in partner<br>3. Steady Girlfriend/Boyfriend<br>4. Separated<br>5. Divorced<br>99. Other, specify |
| a6   | How many living children do you have?                                                           | _____                                                                                                                   |
| a6b  | What is the age of your <u>youngest</u> child?                                                  | _____                                                                                                                   |
| a6bc | What age is the child (in years or months)                                                      | _____                                                                                                                   |
| a4b  | How many children currently live with you?                                                      | _____                                                                                                                   |
| a7   | How many sexual partners have you had in the past 12 months?                                    | _____                                                                                                                   |
| a8   | Have you had sex with someone besides your wife/husband without a condom in the past 12 months? | 1. Yes<br>0. No<br>88. Don't know/ Not sure<br>89. Refused to answer                                                    |

|                                    |                                                                                                                                                                                                                             |                                                                                                                |
|------------------------------------|-----------------------------------------------------------------------------------------------------------------------------------------------------------------------------------------------------------------------------|----------------------------------------------------------------------------------------------------------------|
| a8b                                | Have you had sex without a condom in the past 12 months?                                                                                                                                                                    | 1. Yes<br>0. No<br>88. Don't know/ Not sure<br>89. Refused to answer                                           |
| <b>SECTION B: INCOME QUESTIONS</b> |                                                                                                                                                                                                                             |                                                                                                                |
| Intro Note                         | I will now discuss with you about the valuable items that you or your household possesses. As I will be chatting with you I will also some questions about money you have and activities that you indulge in to find money. |                                                                                                                |
| b1                                 | Please think of the past 12 months, how would you describe your primary occupation?                                                                                                                                         | 1. Working formally (employed full time)<br>2. Working informally (ganyu, farming, business)<br>3. Not working |
| b1b                                | Think about all the work you have done in the past month. How many days did you normally work this month that gave you pay?                                                                                                 | _____                                                                                                          |
| b2                                 | Do you have any savings for the future, such as a bank account, savings group or cash?                                                                                                                                      | 1. Yes<br>0. No                                                                                                |
| <b>Household Assets</b>            |                                                                                                                                                                                                                             |                                                                                                                |
| b3                                 | Does your household have:<br><i>The respondent said that his/her household doesn't have any of the household assets. Please probe and ensure that this is correct before you proceed.</i>                                   |                                                                                                                |
| b3_1                               | Metal Roof?                                                                                                                                                                                                                 | 1. Yes<br>0. No                                                                                                |
| b3_2                               | Electricity?                                                                                                                                                                                                                | 1. Yes                                                                                                         |

|       |                              |                 |
|-------|------------------------------|-----------------|
|       |                              | 0. No           |
| b3_3  | Paraffin lamp with no glass? | 1. Yes<br>0. No |
| b3_4  | A paraffin lamp?             | 1. Yes<br>0. No |
| b3_5  | A radio?                     | 1. Yes<br>0. No |
| b3_6  | A television?                | 1. Yes<br>0. No |
| b3_7  | A cellular phone?            | 1. Yes<br>0. No |
| b3_8  | A bed?                       | 1. Yes<br>0. No |
| b3_9  | A sofa set?                  | 1. Yes<br>0. No |
| b3_10 | A table?                     | 1. Yes<br>0. No |
| b3_11 | A refrigerator               | 1. Yes<br>0. No |
| b3_12 | Mattress?                    | 1. Yes<br>0. No |
| b3_13 | Chair(s)?                    | 1. Yes<br>0. No |
| b3_14 | Cattle?                      | 1. Yes<br>0. No |
| b3_15 | Goat?                        | 1. Yes<br>0. No |
| b3_16 | Sheep?                       | 1. Yes<br>0. No |
| b3_17 | Pigs?                        | 1. Yes<br>0. No |

|                     |                                                                                   |                                                                                                                                                                 |
|---------------------|-----------------------------------------------------------------------------------|-----------------------------------------------------------------------------------------------------------------------------------------------------------------|
| b3_18               | Donkey?                                                                           | 1. Yes<br>0. No                                                                                                                                                 |
| b3_19               | Chickens?                                                                         | 1. Yes<br>0. No                                                                                                                                                 |
| b3_20               | Other poultry?                                                                    | 1. Yes<br>0. No                                                                                                                                                 |
| b4                  | In the past 30 days, have you drank beer?                                         | 1. Yes<br>0. No                                                                                                                                                 |
| b4b                 | How many days in the past 30 days have you drank beer?                            | _____                                                                                                                                                           |
| b4c                 | How much money did you spend on beer the last time you went?                      | MWK:                                                                                                                                                            |
| b4d                 | In total, approximately how much money did you spend on beer in the past 30 days? | MWK:                                                                                                                                                            |
| <b>Relationship</b> |                                                                                   |                                                                                                                                                                 |
| Intro Note          | Now I'd like to talk to you about your current sexual relationship                |                                                                                                                                                                 |
| f8                  | How long have you been/were you in a sexual relationship with your partner?       | Days _____<br>Months _____<br>Years _____                                                                                                                       |
| f9                  | Do you have children with your partner? How many children?                        | _____                                                                                                                                                           |
| f10                 | How often do you currently talk to your partner?                                  | 1. Everyday<br>2. A couple times a week<br>3. Once a week<br>4. A couple times a month<br>5. Once a month<br>6. Less than once a month<br>7. Not at all (never) |
| f10b                | In a typical month, who earns more money? You, or your partner?                   | 1. Myself<br>2. This partner<br>3. We earn the same amount<br><br>88. Don't know                                                                                |



| Decision Making |                                                                                 |                                                                                                                                                                                    |
|-----------------|---------------------------------------------------------------------------------|------------------------------------------------------------------------------------------------------------------------------------------------------------------------------------|
| Intro Note      | Now I would like to talk to you about how you and your partner make decisions.  |                                                                                                                                                                                    |
| f11             | Who usually decides how the money you earn will be used?                        | 1. Yourself (Respondent)<br>2. Jointly (This partner and you together)<br>3. Mainly this partner<br>4. Someone else<br>5. Do not earn money<br>88. Refuse to say                   |
| f11b            | (if above question=4 ) Who decides?                                             | _____                                                                                                                                                                              |
| f12             | Who usually decides how your partner's earnings will be used?                   | 1. Yourself (Respondent)<br>2. Jointly (This partner and you together)<br>3. Mainly this partner<br>4. Someone else<br>5. Do not earn money<br>88. Refuse to say                   |
| f12b            | (if above question=4 ) Who decides?                                             | _____                                                                                                                                                                              |
| f13             | Who usually makes decisions about health care for yourself?                     | 1. Yourself (Respondent)<br>2. Jointly (This partner and you together)<br>3. Mainly this partner<br>4. Someone else<br>5. Not applicable/ Don't have children<br>88. Refuse to say |
| f13b            | (if above question=4 ) Who decides?                                             | _____                                                                                                                                                                              |
| f14             | Who usually makes decisions about health care for your child with this partner? | 1. Yourself (Respondent)<br>2. Jointly (This partner and you together)<br>3. Mainly this partner<br>4. Someone else                                                                |

|      |                                                                                                                                                                                                                                                                                                                                                                                                                                                                                                                                          |                                                                                                                                                                                                               |
|------|------------------------------------------------------------------------------------------------------------------------------------------------------------------------------------------------------------------------------------------------------------------------------------------------------------------------------------------------------------------------------------------------------------------------------------------------------------------------------------------------------------------------------------------|---------------------------------------------------------------------------------------------------------------------------------------------------------------------------------------------------------------|
|      |                                                                                                                                                                                                                                                                                                                                                                                                                                                                                                                                          | <p>5. Not applicable/ Don't have children</p> <p>88. Refuse to say</p>                                                                                                                                        |
| f14b | (if above question=4 ) Who decides?                                                                                                                                                                                                                                                                                                                                                                                                                                                                                                      | _____                                                                                                                                                                                                         |
| f15  | Who usually makes decisions about health care for your partner?                                                                                                                                                                                                                                                                                                                                                                                                                                                                          | <p>1. Yourself (Respondent)</p> <p>2. Jointly (This partner and you together)</p> <p>3. Mainly this partner</p> <p>4. Someone else</p> <p>5. Not applicable/ Don't have children</p> <p>88. Refuse to say</p> |
| f15b | (if above question=4 ) Who decides?                                                                                                                                                                                                                                                                                                                                                                                                                                                                                                      | _____                                                                                                                                                                                                         |
| f16  | Who usually makes decisions about making major household purchases?                                                                                                                                                                                                                                                                                                                                                                                                                                                                      | <p>1. Yourself (Respondent)</p> <p>2. Jointly (This partner and you together)</p> <p>3. Mainly this partner</p> <p>4. Someone else</p> <p>5. Not applicable/ Don't have children</p> <p>88. Refuse to say</p> |
| f16b | (if above question=4 ) Who decides?                                                                                                                                                                                                                                                                                                                                                                                                                                                                                                      | _____                                                                                                                                                                                                         |
| Note | <p>I would like to ask you questions about [probability/chance/likelihood] that certain things will happen. There are ten beans in this cup. I will ask you to pick some of the beans and put them in the plate. The number of beans that you are going to put in the plate will reflect the probability that something will happen. One bean means there is very little chance that something will happen. If you do not put any bean in the plate it means you are certain that there is no likelihood that something will happen.</p> |                                                                                                                                                                                                               |

|          |                                                                                                                                                                                                                                                                                                                                                                                                                                                                                                                                                                                                                                                                          |                         |
|----------|--------------------------------------------------------------------------------------------------------------------------------------------------------------------------------------------------------------------------------------------------------------------------------------------------------------------------------------------------------------------------------------------------------------------------------------------------------------------------------------------------------------------------------------------------------------------------------------------------------------------------------------------------------------------------|-------------------------|
| note2    | <p>If you put additional beans in the plate it means the chance that something will happen will also increase. For example, if you put one or two beans in the plate, it means there is little chance that something will happen. Even though there is little chance but it can happen. If you put ten beans it means there is equal chance of something happening or not. If you put six beans it means the chance that something will happen is slightly greater than not happening. If you put all ten beans, it means you are certain that whatever the case something will really happen. There is no wrong or right answer I just want to know what you think.</p> |                         |
| note3    | <p>INTERVIEWER: Report for each question the NUMBER OF BEANS put in the PLATE. After each question, replace the beans on the table (unless otherwise noted).</p>                                                                                                                                                                                                                                                                                                                                                                                                                                                                                                         |                         |
| Practice |                                                                                                                                                                                                                                                                                                                                                                                                                                                                                                                                                                                                                                                                          |                         |
| pr1      | <p>Pick the number of beans that reflects how likely you think it is that:</p>                                                                                                                                                                                                                                                                                                                                                                                                                                                                                                                                                                                           | _____                   |
| pr1b     | <p>You will go to the market at least once within the next 2 days.</p>                                                                                                                                                                                                                                                                                                                                                                                                                                                                                                                                                                                                   | _____                   |
| pr1c     | <p>You will go to the market at least once within the next 2 weeks.</p>                                                                                                                                                                                                                                                                                                                                                                                                                                                                                                                                                                                                  | _____                   |
| Practice |                                                                                                                                                                                                                                                                                                                                                                                                                                                                                                                                                                                                                                                                          |                         |
| pr2      | <p>INTERVIEWER: Did Respondent add any beans between pr1b and pr1c?</p>                                                                                                                                                                                                                                                                                                                                                                                                                                                                                                                                                                                                  | <p>1. Yes<br/>0. No</p> |

|                                           |                                                                                                                                                                                                                                                                                                                                                                                                                               |                                                                                                                                                                                      |
|-------------------------------------------|-------------------------------------------------------------------------------------------------------------------------------------------------------------------------------------------------------------------------------------------------------------------------------------------------------------------------------------------------------------------------------------------------------------------------------|--------------------------------------------------------------------------------------------------------------------------------------------------------------------------------------|
| pr3                                       | <p>Remember, as time goes by, you may find more time to go to the market. Therefore, you should have added beans to the plate. Let me ask you again. Now, add beans in the plate so that the number of beans in the plate reflects how likely you think it is that you will go to the market at least once within 2 weeks.</p> <p>How likely you think it is that you will go to the market at least once within 2 weeks?</p> | _____                                                                                                                                                                                |
| f17                                       | Pick the number of beans that reflects how likely you think:                                                                                                                                                                                                                                                                                                                                                                  |                                                                                                                                                                                      |
| f17b                                      | You will still be married/with [partner one year from now.                                                                                                                                                                                                                                                                                                                                                                    | _____                                                                                                                                                                                |
| f17c                                      | You are currently infected with HIV/AIDS                                                                                                                                                                                                                                                                                                                                                                                      | _____                                                                                                                                                                                |
| f17d                                      | You will become infected with HIV/AIDS during the next 12 months                                                                                                                                                                                                                                                                                                                                                              | _____                                                                                                                                                                                |
| f17e                                      | You will become infected with HIV/AIDS during their lifetime                                                                                                                                                                                                                                                                                                                                                                  | _____                                                                                                                                                                                |
| f17c                                      | partner is infected with HIV/AIDS now.                                                                                                                                                                                                                                                                                                                                                                                        | _____                                                                                                                                                                                |
| f17d                                      | partner will become infected with HIV/AIDS during the next 12 months.                                                                                                                                                                                                                                                                                                                                                         | _____                                                                                                                                                                                |
| <b>SELF REPORTED HEALTH AND HAPPINESS</b> |                                                                                                                                                                                                                                                                                                                                                                                                                               |                                                                                                                                                                                      |
| Intro Note                                | Now I'd like to talk to you about how healthy and happy you feel.                                                                                                                                                                                                                                                                                                                                                             |                                                                                                                                                                                      |
| e1                                        | I am interested in your general level of well-being or satisfaction with life. How satisfied are you with your life, all things considered?                                                                                                                                                                                                                                                                                   | <ol style="list-style-type: none"> <li>1. Very satisfied</li> <li>2. Somewhat satisfied</li> <li>3. Neutral</li> <li>4. Somewhat unsatisfied</li> <li>5. Very unsatisfied</li> </ol> |

|                                   |                                                                                                                       |                                                                                                                                          |
|-----------------------------------|-----------------------------------------------------------------------------------------------------------------------|------------------------------------------------------------------------------------------------------------------------------------------|
| e2                                | Do you think that you are more, equally or less satisfied than other persons your age and sex living in your village? | <ol style="list-style-type: none"> <li>1. More satisfied</li> <li>2. Equally satisfied</li> <li>3. Less satisfied</li> </ol>             |
| e3                                | In general, would you say your health now is: very good, good, poor or very poor?                                     | <ol style="list-style-type: none"> <li>1. Very good</li> <li>2. Good</li> <li>3. Poor</li> <li>4. Very poor</li> </ol>                   |
| e4                                | How would you compare your health to other people of the same age and sex in your village?                            | <ol style="list-style-type: none"> <li>1. More healthy</li> <li>2. Equally healthy</li> <li>3. Less healthy</li> </ol>                   |
| e5                                | In the past month, how many days were you too sick to work/go to school/complete household chores?                    | _____                                                                                                                                    |
| <b>Happiness</b>                  |                                                                                                                       |                                                                                                                                          |
| e6                                | How true are the following statements for you in the last month?                                                      |                                                                                                                                          |
| e6_1                              | I have felt depressed                                                                                                 | <ol style="list-style-type: none"> <li>1. Strongly Agree</li> <li>2. Agree</li> <li>3. Disagree</li> <li>4. Strongly Disagree</li> </ol> |
| e6_2                              | I have felt life was not worth living                                                                                 | <ol style="list-style-type: none"> <li>1. Strongly Agree</li> <li>2. Agree</li> <li>3. Disagree</li> <li>4. Strongly Disagree</li> </ol> |
| e6_3                              | I have felt content.                                                                                                  | <ol style="list-style-type: none"> <li>1. Strongly Agree</li> <li>2. Agree</li> <li>3. Disagree</li> <li>4. Strongly Disagree</li> </ol> |
| e6_4                              | I have felt lonely                                                                                                    | <ol style="list-style-type: none"> <li>1. Strongly Agree</li> <li>2. Agree</li> <li>3. Disagree</li> <li>4. Strongly Disagree</li> </ol> |
| <b>GENDER EQUITABLE MEN SCALE</b> |                                                                                                                       |                                                                                                                                          |
| Note                              | Please tell me if you strongly agree, agree, disagree, or strongly disagree with the following statements:            |                                                                                                                                          |

|    |                                                                                                            |                                                                                                                                                                                      |
|----|------------------------------------------------------------------------------------------------------------|--------------------------------------------------------------------------------------------------------------------------------------------------------------------------------------|
| j1 | Woman's most important role is to take care of her home and cook (take care of home is about housekeeping) | <ol style="list-style-type: none"> <li>1. Strongly Agree</li> <li>2. Agree</li> <li>3. Unsure</li> <li>4. Disagree</li> <li>5. Strongly Disagree</li> </ol> <p>88. Refuse to say</p> |
| j2 | Men need sex more than women                                                                               | <ol style="list-style-type: none"> <li>1. Strongly Agree</li> <li>2. Agree</li> <li>3. Unsure</li> <li>4. Disagree</li> <li>5. Strongly Disagree</li> </ol> <p>88. Refuse to say</p> |
| j3 | Men don't talk about sex, they just do it.                                                                 | <ol style="list-style-type: none"> <li>1. Strongly Agree</li> <li>2. Agree</li> <li>3. Unsure</li> <li>4. Disagree</li> <li>5. Strongly Disagree</li> </ol> <p>88. Refuse to say</p> |
| j4 | There are times when a woman deserves to be beaten                                                         | <ol style="list-style-type: none"> <li>1. Strongly Agree</li> <li>2. Agree</li> <li>3. Unsure</li> <li>4. Disagree</li> <li>5. Strongly Disagree</li> </ol> <p>88. Refuse to say</p> |
| j5 | Changing diapers, giving kids a bath & feeding kids are mother's responsibility                            | <ol style="list-style-type: none"> <li>1. Strongly Agree</li> <li>2. Agree</li> <li>3. Unsure</li> <li>4. Disagree</li> <li>5. Strongly Disagree</li> </ol> <p>88. Refuse to say</p> |
| j6 | It is a woman's responsibility to avoid getting pregnant                                                   | <ol style="list-style-type: none"> <li>1. Strongly Agree</li> <li>2. Agree</li> <li>3. Unsure</li> <li>4. Disagree</li> <li>5. Strongly Disagree</li> </ol> <p>88. Refuse to say</p> |
| j7 | A man should have the final word about decisions in his home                                               | <ol style="list-style-type: none"> <li>1. Strongly Agree</li> <li>2. Agree</li> <li>3. Unsure</li> <li>4. Disagree</li> </ol>                                                        |

|      |                                                                            |                                                                                                        |
|------|----------------------------------------------------------------------------|--------------------------------------------------------------------------------------------------------|
|      |                                                                            | 5. Strongly Disagree<br>88. Refuse to say                                                              |
| j8   | Men are always ready to have sex                                           | 1. Strongly Agree<br>2. Agree<br>3. Unsure<br>4. Disagree<br>5. Strongly Disagree<br>88. Refuse to say |
| j9   | A woman should tolerate violence in order to keep her family together      | 1. Strongly Agree<br>2. Agree<br>3. Unsure<br>4. Disagree<br>5. Strongly Disagree<br>88. Refuse to say |
| j10a | I would be outraged if my wife asked me to use a condom.                   | 1. Strongly Agree<br>2. Agree<br>3. Unsure<br>4. Disagree<br>5. Strongly Disagree<br>88. Refuse to say |
| j10b | Men would be outraged if their wife asked them to use a condom             | 1. Strongly Agree<br>2. Agree<br>3. Unsure<br>4. Disagree<br>5. Strongly Disagree<br>88. Refuse to say |
| j11  | A man and a woman should decide together what type of contraceptive to use | 1. Strongly Agree<br>2. Agree<br>3. Unsure<br>4. Disagree<br>5. Strongly Disagree<br>88. Refuse to say |
| j12  | I would never have a homosexual friend                                     | 1. Strongly Agree<br>2. Agree<br>3. Unsure<br>4. Disagree<br>5. Strongly Disagree<br>88. Refuse to say |

|      |                                                                                       |                                                                                                                                                                                      |
|------|---------------------------------------------------------------------------------------|--------------------------------------------------------------------------------------------------------------------------------------------------------------------------------------|
| j13a | If someone insults me, I will defend my reputation, with force if I have to.          | <ol style="list-style-type: none"> <li>1. Strongly Agree</li> <li>2. Agree</li> <li>3. Unsure</li> <li>4. Disagree</li> <li>5. Strongly Disagree</li> </ol> <p>88. Refuse to say</p> |
| j13b | If someone insults a man, he should defend his reputation, with force if he has to    | <ol style="list-style-type: none"> <li>1. Strongly Agree</li> <li>2. Agree</li> <li>3. Unsure</li> <li>4. Disagree</li> <li>5. Strongly Disagree</li> </ol> <p>88. Refuse to say</p> |
| j14  | To be a man you need to be tough.                                                     | <ol style="list-style-type: none"> <li>1. Strongly Agree</li> <li>2. Agree</li> <li>3. Unsure</li> <li>4. Disagree</li> <li>5. Strongly Disagree</li> </ol> <p>88. Refuse to say</p> |
| j15  | Men should be embarrassed if unable to get an erection                                | <ol style="list-style-type: none"> <li>1. Strongly Agree</li> <li>2. Agree</li> <li>3. Unsure</li> <li>4. Disagree</li> <li>5. Strongly Disagree</li> </ol> <p>88. Refuse to say</p> |
| j16  | If a guy gets a woman pregnant, child is the responsibility of both the man and woman | <ol style="list-style-type: none"> <li>1. Strongly Agree</li> <li>2. Agree</li> <li>3. Unsure</li> <li>4. Disagree</li> <li>5. Strongly Disagree</li> </ol> <p>88. Refuse to say</p> |
| j17  | A man should know what his partner likes during sex                                   | <ol style="list-style-type: none"> <li>1. Strongly Agree</li> <li>2. Agree</li> <li>3. Unsure</li> <li>4. Disagree</li> <li>5. Strongly Disagree</li> </ol> <p>88. Refuse to say</p> |
| j18  | The participation of the father is important in raising children                      | <ol style="list-style-type: none"> <li>1. Strongly Agree</li> <li>2. Agree</li> <li>3. Unsure</li> <li>4. Disagree</li> </ol>                                                        |



|                     |                                                                                                                                                                                                                  |                                                                                                        |
|---------------------|------------------------------------------------------------------------------------------------------------------------------------------------------------------------------------------------------------------|--------------------------------------------------------------------------------------------------------|
|                     |                                                                                                                                                                                                                  | 5. Strongly Disagree<br>88. Refuse to say                                                              |
| j19                 | It's important for men to have friends to talk about their problems                                                                                                                                              | 1. Strongly Agree<br>2. Agree<br>3. Unsure<br>4. Disagree<br>5. Strongly Disagree<br>88. Refuse to say |
| j20                 | A couple should decide together if they want to have children.                                                                                                                                                   | 1. Strongly Agree<br>2. Agree<br>3. Unsure<br>4. Disagree<br>5. Strongly Disagree<br>88. Refuse to say |
| <b>STIGMA</b>       |                                                                                                                                                                                                                  |                                                                                                        |
| Note                | In this next section I'd like to discuss your thoughts about people living with HIV in your community. Please feel free to talk openly, there is no right or wrong answer. I am interested in your own thoughts. |                                                                                                        |
| i3                  | I would buy fresh vegetables from a shopkeeper or vendor if I knew that this person had HIV                                                                                                                      | 1. Strongly Agree<br>2. Agree<br>3. Neutral<br>4. Disagree<br>5. Strongly Disagree                     |
| i4                  | If a member of my family became sick with AIDS, I would be willing to care for her or him in our own household                                                                                                   | 1. Strongly Agree<br>2. Agree<br>3. Neutral<br>4. Disagree<br>5. Strongly Disagree                     |
| i5                  | In my opinion, if a female teacher has HIV but is not sick, she should be allowed to continue teaching in the school                                                                                             | 1. Strongly Agree<br>2. Agree<br>3. Neutral<br>4. Disagree<br>5. Strongly Disagree                     |
| <b>EXPECTATIONS</b> |                                                                                                                                                                                                                  |                                                                                                        |

|            |                                                                                                                                                                                                                                                                                                                                                                                                                                                                                                                                    |       |
|------------|------------------------------------------------------------------------------------------------------------------------------------------------------------------------------------------------------------------------------------------------------------------------------------------------------------------------------------------------------------------------------------------------------------------------------------------------------------------------------------------------------------------------------------|-------|
| Intro Note | I would like to ask you questions about [probability/chance/likelihood] that certain things will happen. There are ten beans in this cup. I will ask you to pick some of the beans and put them in the plate. The number of beans that you are going to put in the place will reflect the probability that something will happen. One beans means there is very little chance that something will happen. If you do not put any bean in the plate it means you are certain that there is no likelihood that something will happen. |       |
| h4         | Pick the number of beans that reflects how likely you think it is that:                                                                                                                                                                                                                                                                                                                                                                                                                                                            | _____ |
| h4b        | You will have to rely on family members for financial assistance in the next 12 months.                                                                                                                                                                                                                                                                                                                                                                                                                                            | _____ |
| h4c        | You will have to provide some family members with financial assistance in the next 12 months.                                                                                                                                                                                                                                                                                                                                                                                                                                      | _____ |
| Note       | Next, I would like to ask you a few questions about what you expect in the future. I know that nobody knows for sure what the future may bring, but let's just talk about your best guess.                                                                                                                                                                                                                                                                                                                                         |       |
| h5         | In the next year how likely is it that you will:                                                                                                                                                                                                                                                                                                                                                                                                                                                                                   |       |
| h5a        | You will be enrolled in school one year from now                                                                                                                                                                                                                                                                                                                                                                                                                                                                                   | _____ |
| h5b        | Start a new business?                                                                                                                                                                                                                                                                                                                                                                                                                                                                                                              | _____ |
| h5c        | Open a bank account?                                                                                                                                                                                                                                                                                                                                                                                                                                                                                                               | _____ |
| h5d        | Buy land?                                                                                                                                                                                                                                                                                                                                                                                                                                                                                                                          | _____ |

|                     |                                                                                                                                                                               |                                                                                        |
|---------------------|-------------------------------------------------------------------------------------------------------------------------------------------------------------------------------|----------------------------------------------------------------------------------------|
| h5e                 | Save money?                                                                                                                                                                   | _____                                                                                  |
| h5f                 | Experience shortage of food?                                                                                                                                                  | _____                                                                                  |
| h5g                 | Have steady work?                                                                                                                                                             | _____                                                                                  |
| Tested for HIV      |                                                                                                                                                                               |                                                                                        |
| pd2                 | Approximately how many times have you ever been tested for HIV?<br><i>Enter "-99" if client doesn't remember</i>                                                              | _____                                                                                  |
| pd3                 | When was the last time you were tested for HIV?                                                                                                                               | a. Year _____<br>b. Month _____                                                        |
| pd5                 | Think about the very first time you received an HIV+ test result. Since that very first HIV+ test result, have you ever tested for HIV again (excluding a confirmatory test)? | 1. Yes<br>0. No                                                                        |
| pd6                 | Have you ever initiated ART?                                                                                                                                                  | 1. Yes<br>0. No                                                                        |
| First Initiated ART |                                                                                                                                                                               |                                                                                        |
| pd6b                | When did you first initiate ART?                                                                                                                                              | a. Year _____<br>b. Month _____                                                        |
| pd7                 | Have you ever been >14 days late for an ART appointment?                                                                                                                      | 1. Yes<br>0. No                                                                        |
| pd7b                | How many times?                                                                                                                                                               | _____                                                                                  |
| pd8                 | Do you know anyone who is on ART?                                                                                                                                             | 1. Yes<br>0. No                                                                        |
| pd8b                | Now think about the person on ART who you are closest with.<br><br>How often do you talk with them                                                                            | 1. Everyday<br>2. A couple times a week<br>3. Once a week<br>4. A couple times a month |

|       |                                                                        |                                                                                                                                                                                                                                                                                                                                                    |
|-------|------------------------------------------------------------------------|----------------------------------------------------------------------------------------------------------------------------------------------------------------------------------------------------------------------------------------------------------------------------------------------------------------------------------------------------|
|       | about ART?                                                             | <ol style="list-style-type: none"> <li>5. Once a month</li> <li>6. Less than once a month</li> <li>7. Not at all (never)</li> </ol>                                                                                                                                                                                                                |
| pd9   | Have you disclosed your HIV status to anyone besides your partner?     | <ol style="list-style-type: none"> <li>1. Yes</li> <li>0. No</li> </ol>                                                                                                                                                                                                                                                                            |
| pd9b  | <p>Who else did you disclose to?</p> <p><i>Mark all that apply</i></p> | <ol style="list-style-type: none"> <li>1. Sister</li> <li>2. Brother</li> <li>3. Father</li> <li>4. Mother</li> <li>5. Uncle</li> <li>6. Aunt</li> <li>7. Friend</li> <li>8. Mother-in-Law</li> <li>9. Father-in-Law</li> <li>10. My children</li> <li>11. Employee</li> <li>12. Other sexual partner</li> <li>99. Other, specify _____</li> </ol> |
| pd10  | Of those people you disclosed to, who do you talk to most often?       | <ol style="list-style-type: none"> <li>1. Sister</li> <li>2. Brother</li> <li>3. Father</li> <li>4. Mother</li> <li>5. Uncle</li> <li>6. Aunt</li> <li>7. Friend</li> <li>8. Mother-in-Law</li> <li>9. Father-in-Law</li> <li>10. My children</li> <li>11. Employee</li> <li>12. Other sexual Partner</li> <li>99. Other, specify _____</li> </ol> |
| pd10c | How often do you talk to that person?                                  | <ol style="list-style-type: none"> <li>1. Everyday</li> <li>2. A couple times a week</li> <li>3. Once a week</li> <li>4. A couple times a month</li> <li>5. Once a month</li> <li>6. Less than once a month</li> <li>7. Not at all (never)</li> </ol>                                                                                              |

| PREVIOUS USE OF HEALTH SERVICES |                                                                                                                                                                                               |                                                                                                                                                                                                        |
|---------------------------------|-----------------------------------------------------------------------------------------------------------------------------------------------------------------------------------------------|--------------------------------------------------------------------------------------------------------------------------------------------------------------------------------------------------------|
| Intro Note                      | Now I'd like to talk to you about your experience with using health services at health facilities.                                                                                            |                                                                                                                                                                                                        |
| h1                              | Have you gone to a health facility in the past 12 months (either for yourself or someone else - AKA as a guardian)?                                                                           | 1. Yes<br>0. No                                                                                                                                                                                        |
| h2                              | How many times have you gone to the health facility in the past 12 months?                                                                                                                    | _____                                                                                                                                                                                                  |
| h3                              | Now think about yourself specifically. How many times have you gone to a health facility in the past 12 months for your own health care?                                                      | _____                                                                                                                                                                                                  |
| h_a1                            | When was the last time (the YEAR) you went to a health facility for YOUR OWN health?<br><br>NOTE: PUT WHAT YEAR. (i.e., 2015). If DO NOT REMEMBER, help them estimate. IF NEVER GONE, put -99 | _____                                                                                                                                                                                                  |
| h4                              | What services did you receive at your <u>last</u> health facility visit for your own health?                                                                                                  | 1. ANC<br>2. Family Planning<br>3. Delivery<br>4. Post-natal<br>5. Under Five<br>6. HTC<br>7. ART<br>8. Feeling sick (OPD)<br>9. Injury (OPD)<br>10. Dentist<br>11. None<br><br>99. Other specify_____ |
| h_a2                            | Now think about the SECOND most recent time you went to a health facility for YOUR OWN health. What year did you go to the health facility?                                                   | _____                                                                                                                                                                                                  |
| c3                              | Now please think about your MOST RECENT visit to a health facility, excluding today. When did you go?                                                                                         | a. Year _____<br>b. Month _____                                                                                                                                                                        |

|     |                                                                |                                                                                                                                                                                                     |
|-----|----------------------------------------------------------------|-----------------------------------------------------------------------------------------------------------------------------------------------------------------------------------------------------|
| c4  | Which facility did you go to?                                  | 1. Current facility<br>0. Other facility, specify _____                                                                                                                                             |
| c5  | What was the main service you went for?                        | 1. ANC<br>2. Family Planning<br>3. Delivery<br>4. Post-natal<br>5. Under Five<br>6. HTC<br>7. ART<br>8. Feeling sick (OPD)<br>9. Injury (OPD)<br>10. Dentist<br>11. None<br>99. Other specify _____ |
| c5b | Who received services?                                         | 1. Myself<br>2. My child<br>3. My partner<br>4. Another family member<br>5. A friend<br>99. Other, specify _____                                                                                    |
| c6a | Did you (or the person you came with) receive another service? | 1. Yes<br>0. No                                                                                                                                                                                     |
| c6  | What was the second service you went for?                      | 1. ANC<br>2. Family Planning<br>3. Delivery<br>4. Post-natal<br>5. Under Five<br>6. HTC<br>7. ART<br>8. Feeling sick (OPD)<br>9. Injury (OPD)<br>10. Dentist<br>11. None<br>99. Other specify _____ |
| c6b | Who received services?                                         | 1. Myself<br>2. My child<br>3. My partner<br>4. Another family member<br>5. A friend<br>99. Other, specify _____                                                                                    |

| Service Satisfaction |                                                                                                                                                                                                                                                                   |                                                                                   |
|----------------------|-------------------------------------------------------------------------------------------------------------------------------------------------------------------------------------------------------------------------------------------------------------------|-----------------------------------------------------------------------------------|
| c10                  | Now I would like to talk to you about your satisfaction with the services you received that day. Please tell me whether any of these were problems for you at the VISIT YOU ARE THINKING ABOUT NOW, and if so, whether they were major or minor problems for you. |                                                                                   |
| c10_1                | Time you waited to see a provider                                                                                                                                                                                                                                 | 1. Major<br>2. Minor<br><br>0. No-problem<br>88. Not applicable<br>89. Don't know |
| c10_2                | Ability to discuss problems or concerns about your pregnancy                                                                                                                                                                                                      | 1. Major<br>2. Minor<br><br>0. No-problem<br>88. Not applicable<br>89. Don't know |
| c10_3                | Amount of explanation you received about the problem or treatment                                                                                                                                                                                                 | 1. Major<br>2. Minor<br><br>0. No-problem<br>88. Not applicable<br>89. Don't know |
| c10_4                | Privacy from having others see the examination                                                                                                                                                                                                                    | 1. Major<br>2. Minor<br><br>0. No-problem<br>88. Not applicable<br>89. Don't know |
| c10_5                | Privacy from having others hear your consultation discussion                                                                                                                                                                                                      | 1. Major<br>2. Minor<br><br>0. No-problem<br>88. Not applicable<br>89. Don't know |
| c10_6                | Availability of medicines at this facility                                                                                                                                                                                                                        | 1. Major<br>2. Minor                                                              |

|              |                                                                                                                                                |                                                                                                                                                                                                                           |
|--------------|------------------------------------------------------------------------------------------------------------------------------------------------|---------------------------------------------------------------------------------------------------------------------------------------------------------------------------------------------------------------------------|
|              |                                                                                                                                                | <ul style="list-style-type: none"> <li>0. No-problem</li> <li>88. Not applicable</li> <li>89. Don't know</li> </ul>                                                                                                       |
| c10_7        | The hours of service at this facility, i.e., when they open and close                                                                          | <ul style="list-style-type: none"> <li>1. Major</li> <li>2. Minor</li> <li>0. No-problem</li> <li>88. Not applicable</li> <li>89. Don't know</li> </ul>                                                                   |
| c10_8        | The number of days services are available to you                                                                                               | <ul style="list-style-type: none"> <li>1. Major</li> <li>2. Minor</li> <li>0. No-problem</li> <li>88. Not applicable</li> <li>89. Don't know</li> </ul>                                                                   |
| c10_9        | The cleanliness of the facility                                                                                                                | <ul style="list-style-type: none"> <li>1. Major</li> <li>2. Minor</li> <li>0. No-problem</li> <li>88. Not applicable</li> <li>89. Don't know</li> </ul>                                                                   |
| c10_10       | How the staff treated you                                                                                                                      | <ul style="list-style-type: none"> <li>1. Major</li> <li>2. Minor</li> <li>0. No-problem</li> <li>88. Not applicable</li> <li>89. Don't know</li> </ul>                                                                   |
| c10_11       | Cost for services or treatments                                                                                                                | <ul style="list-style-type: none"> <li>1. Major</li> <li>2. Minor</li> <li>0. No-problem</li> <li>88. Not applicable</li> <li>89. Don't know</li> </ul>                                                                   |
| Satisfaction |                                                                                                                                                |                                                                                                                                                                                                                           |
| c11          | In general, which of the following statements best describes your opinion of the services you either received or were provided at the facility | <ul style="list-style-type: none"> <li>1. I am very satisfied with the services I received</li> <li>2. I am satisfied with the services I received</li> <li>3. I am not satisfied with the services I received</li> </ul> |



|                    |                                                                                                                         |                                                        |
|--------------------|-------------------------------------------------------------------------------------------------------------------------|--------------------------------------------------------|
|                    |                                                                                                                         | 4. I am very dissatisfied with the services I received |
| c12                | Did you recommend this health facility to a friend or family member?                                                    | 1. Yes<br>0. No                                        |
| Comment            | We have reached the end of the chat. Thank you for your time. Do you have anything else you would like to say?          |                                                        |
| End Note           | Thank the participant for their time and give them transport reimbursement, if they did not come for an ART appointment |                                                        |
| Comments           | Enumerator comments                                                                                                     |                                                        |
| End of the survey! |                                                                                                                         |                                                        |

**BASELINE SURVEY**  
**Identifying efficient linkage strategies for HIV self-testing (IDEaL)**  
 Male (Chichewa)

| Question Name           | Label                                                                                                                                                                                                 | Responses                                                                             |
|-------------------------|-------------------------------------------------------------------------------------------------------------------------------------------------------------------------------------------------------|---------------------------------------------------------------------------------------|
| INTRODUCTION SECTION    |                                                                                                                                                                                                       |                                                                                       |
| interviewer             | Full Name of Interviewer                                                                                                                                                                              |                                                                                       |
| Interview date          | Interview date                                                                                                                                                                                        |                                                                                       |
| Time start              | Time survey started                                                                                                                                                                                   |                                                                                       |
| District                | District                                                                                                                                                                                              |                                                                                       |
| Facility                | Facility                                                                                                                                                                                              |                                                                                       |
| ID                      | ID                                                                                                                                                                                                    |                                                                                       |
| SECTION A: DEMOGRAPHICS |                                                                                                                                                                                                       |                                                                                       |
| Intro Note              | Zikomo povomera kutenga nawo mbali. Pa nthawi ino ndikufunsani ma funso ochepa okhudza za inu komanso kuti ndinu ndani. Chonde khalani omasuka kuyankha moona. Palibe yankho lokhoza komanso lolakwa. |                                                                                       |
| a7                      | Ndinu mtundu wanji wa munthu?                                                                                                                                                                         | 9. Lomwe<br>10. Sena<br>11. Chewa<br>12. Mang'anja/Nyanja<br>13. Ngoni<br>14. Tumbuka |

|      |                                                                                                                             |                                                                                                                             |
|------|-----------------------------------------------------------------------------------------------------------------------------|-----------------------------------------------------------------------------------------------------------------------------|
|      |                                                                                                                             | 15. Tonga<br>16. Yao<br>99. Other, specify                                                                                  |
| a3   | Kodi maphunziro anu mudapita nawo patali bwanji?                                                                            | 1. Pulayimale<br>2. Sekondale<br>3. Koleji                                                                                  |
| a3b  | Ndi kalasi liti munamaliza ya maphunziro anu apamwamba?                                                                     | _____                                                                                                                       |
| a4   | Chonde ganizani za masabata khumi ndi awiri apitawa, mungafotokoze bwanji za ntchito yomwe mumagwira?                       | 1. Ntchito yokhazikika (ya nthawi yayitali)<br>2. Ntchito yosakhazikika (ganyu, ulimi, bizinesi)<br>3. Sindikugwira ntchito |
| a5   | Kodi pakadali pano muli pa banja?                                                                                           | 1. Pa banja<br>2. Kukhala limodzi ngati banja<br>3. Chibwezi Chokhazikika<br>4. Tinasiyana<br>5. Banja linatha<br>99. Zina  |
| a6   | Muli ndi ana angati amoyo?                                                                                                  | _____                                                                                                                       |
| a6b  | Mwana wanu wang'ono ali ndi zaka zingati?                                                                                   | _____                                                                                                                       |
| a6bc | Mwana wanu wang'ono ali ndi zaka zingati?                                                                                   | _____                                                                                                                       |
| a4b  | Pakadali pano ana omwe mumakhala nawo ndi angati?                                                                           | _____                                                                                                                       |
| a7   | Pa miyezi khumi ndi iwiri yapitayi mwakhala ndi abwenzi ogonana nawo angati?                                                | _____                                                                                                                       |
| a8   | Mwakhlapo ndi bwenzi logonana kupatula akazi anu? amuna anu osagwiritsa ntchito kondomu mu miyezi khumi ndi awiri yapitayi? | 1. Eya<br>2. Ayi<br>88. Sindikudziwa<br>89. Akana kuyankha                                                                  |

|                                    |                                                                                                                                                                                                         |                                                                                                                                      |
|------------------------------------|---------------------------------------------------------------------------------------------------------------------------------------------------------------------------------------------------------|--------------------------------------------------------------------------------------------------------------------------------------|
| a8b                                | Mwagonanapo ndi munthu osagwiritsa ntchito kondomu mu miyezi khumi ndi awiri yapitayi?                                                                                                                  | <ol style="list-style-type: none"> <li>1. Eya</li> <li>2. Ayi</li> <li>88. Sindikudziwa</li> <li>89. Akana kuyankha</li> </ol>       |
| <b>SECTION B: INCOME QUESTIONS</b> |                                                                                                                                                                                                         |                                                                                                                                      |
| Intro Note                         | Pa nthawi ino ndikufunsani za zipangizo zomwe inu komanso apabanja panu alinazo. Mkati mwakucheza kwathu ndikufunsaninso za ndalama zomwe mulinazo komanso komanso zomwe mumachita kuti mupeze ndalama. |                                                                                                                                      |
| b1                                 | Chonde ganizirani za miyezi Khumi ndi iwiri yapitayi, mungafotokoze bwanji za ntchito yomwe mumagwira?                                                                                                  | <ol style="list-style-type: none"> <li>4. Ntchito yokhazikika</li> <li>5. Ganyu/bisinesi</li> <li>6. Sindikugwira ntchito</li> </ol> |
| b1b                                | Ganizani za ntchito zonse mwagwira mwezi watha. Mwagwira masiku angati olipidwa?                                                                                                                        | _____                                                                                                                                |
| b2                                 | Muli ndi ndalama zilizonse zomwe mukusungira za mtsogolo monga, ku banki, gulu losugira ndalama kapena ndalama zosunga kunyumba?                                                                        | <ol style="list-style-type: none"> <li>2. Eya</li> <li>3. Ayi</li> </ol>                                                             |
| <b>Household Assets</b>            |                                                                                                                                                                                                         |                                                                                                                                      |
| b3                                 | Does your household have:<br><i>The respondent said that his/her household doesn't have any of the household assets. Please probe and ensure that this is correct before you proceed.</i>               |                                                                                                                                      |
| b3_1                               | Denga la malata?                                                                                                                                                                                        | <ol style="list-style-type: none"> <li>1. Eya</li> <li>2. Ayi</li> </ol>                                                             |
| b3_2                               | Magetsi ?                                                                                                                                                                                               | <ol style="list-style-type: none"> <li>1. Eya</li> <li>2. Ayi</li> </ol>                                                             |
| b3_3                               | Koloboyi?                                                                                                                                                                                               | <ol style="list-style-type: none"> <li>1. Eya</li> <li>2. Ayi</li> </ol>                                                             |
| b3_4                               | Nyali?                                                                                                                                                                                                  | <ol style="list-style-type: none"> <li>1. Eya</li> <li>2. Ayi</li> </ol>                                                             |

|              |                                                                                |                  |
|--------------|--------------------------------------------------------------------------------|------------------|
| b3_5         | Wailesi?                                                                       | 1. Eya<br>2. Ayi |
| b3_6         | Kanema?                                                                        | 1. Eya<br>2. Ayi |
| b3_7         | Lamya ya M'manja?                                                              | 1. Eya<br>2. Ayi |
| b3_8         | Kama?                                                                          | 1. Eya<br>2. Ayi |
| b3_9         | Sofa?                                                                          | 1. Eya<br>2. Ayi |
| b3_10        | Tebulo?                                                                        | 1. Eya<br>2. Ayi |
| b3_11        | Filiji?                                                                        | 1. Eya<br>2. Ayi |
| b3_12        | Matilesi?                                                                      | 1. Eya<br>2. Ayi |
| b3_13        | Mipando                                                                        | 1. Eya<br>2. Ayi |
| b3_14        | Ng'ombe?                                                                       | 1. Eya<br>2. Ayi |
| b3_15        | Mbuzi?                                                                         | 1. Eya<br>2. Ayi |
| b3_16        | Nkhosa?                                                                        | 1. Eya<br>2. Ayi |
| b3_17        | Nkhumba?                                                                       | 1. Eya<br>2. Ayi |
| b3_18        | Bulu?                                                                          | 1. Eya<br>2. Ayi |
| b3_19        | Nkhuku?                                                                        | 1. Eya<br>2. Ayi |
| b3_20        | Zoweta zina                                                                    | 1. Eya<br>2. Ayi |
| b4           | Mu masiku makumi atatu apitawa mwamako mowa?                                   | 1. Eya<br>2. Ayi |
| b4b          | Pa masiku makumi atatu apitawa mwamwa mowa masiku angati?                      | _____            |
| b4c          | Mwataya ndalama zingati masiku omaliza omwe munapita ku mowa?                  | MWK:             |
| b4d          | Zonse pamodzi, mwataya ndalama zingati pa mowa mu masiku makumi atatu apitawa? | MWK:             |
| Relationship |                                                                                |                  |

|                        |                                                                                                     |                                                                                                                                                                  |
|------------------------|-----------------------------------------------------------------------------------------------------|------------------------------------------------------------------------------------------------------------------------------------------------------------------|
| Intro Note             | Panthawi ino ndikufunsani za abwezi ogonana nawo?                                                   |                                                                                                                                                                  |
| f8                     | Mwakhala pa ubwenzi ogonana ndi bwenzi lanu kwa nthawi yayitali bwanji?                             | Masiku _____<br>Miyezi _____<br>Zaka _____                                                                                                                       |
| f9                     | Muli ndi ana ndi bwenzi lanu logonana nalo? Ana angati?                                             | _____                                                                                                                                                            |
| f10                    | Mumayankhulana mowirikiza bwanji ndi bwenzi lanu pakadali pano?                                     | 1. Tsiku ndi tsiku<br>2. Masiku angapo pasabata<br>3. Kamodzi pa sabata<br>4. Kangapo pa mwezi<br>5. Kamodzi pa mwezi<br>6. Kosakwana mwezi<br>7. Sitiyankhulani |
| f10b                   | Pa mwezi amalandila ndalama zambiri ndi ndani? Inu kapena bwenzi lanu?                              | 1. Ine<br>2. Bwenzi langa<br>3. Timalandira ndalama zofanana<br>4. Sindikudziwa                                                                                  |
| <b>Decision Making</b> |                                                                                                     |                                                                                                                                                                  |
| Intro Note             | Pa nthawi ino ndikufunsani za momwe mumapangira maganizo ndi bwenzi lanu                            |                                                                                                                                                                  |
| f11                    | Nthawi zambiri ndi ndani amene amapanga chiganizo cha momwe ndalama mumapeze zigwiritsidwe ntchito? | 1. Ine<br>2. Timagwirizana<br>3. Nthawi zambiri bwenzi langa<br>4. Munthu wina<br>5. Sindipeza ndalama<br>88. Sindikufuna kuyankha                               |
| f11b                   | (Ngati yankho ndi 4) Amapanga chiganizo ndi ndani?                                                  | _____                                                                                                                                                            |
| f12                    | Amapanga chiganizo cha momwe ndalama za bwenzi lanu zigwiritsidwe ntchito ndi ndani?                | 1. Ine<br>2. Timagwirizana<br>3. Nthawi zambiri bwenzi langa<br>4. Munthu wina<br>5. Sindipeza ndalama                                                           |

|      |                                                                                                               |                                                                                                                                    |
|------|---------------------------------------------------------------------------------------------------------------|------------------------------------------------------------------------------------------------------------------------------------|
|      |                                                                                                               | 88. Sindikufuna kuyankha                                                                                                           |
| f12b | (Ngati yankho ndi 4)                                                                                          | _____                                                                                                                              |
| f13  | Nthawi zambiri amapanga chiganizo chokhudza thandizo la zaumoyo wanu ndi ndani?                               | 1. Ine<br>2. Timagwirizana<br>3. Nthawi zambiri bwenzi langa<br>4. Munthu wina<br>5. Sindipeza ndalama<br>88. Sindikufuna kuyankha |
| f13b | (Ngati yankho ndi 4) Amapanga chiganizo ndi ndani?                                                            | _____                                                                                                                              |
| f14  | Nthawi zambiri amapanga chiganizo cha thandizo la zaumoyo la mwana yemwe muli naye ndi bwenzi lanu ndi ndani? | 6. Ine<br>7. Mogwirizana<br>8. Nthawi zambiri bwenzi langa<br>9. Munthu wina<br>10. Ndilibe mwana<br>88. Sindikufuna kuyankha      |
| f14b | (if above question=4 ) Who decides?                                                                           | _____                                                                                                                              |
| f15  | Nthawi zambiri amapanga chiganizo chokhudza thandizo la zaumoyo la bwenzi lanu ndi ndani?                     | 1. Ine<br>2. Mogwirizana<br>3. Nthawi zambiri bwenzi langa<br>4. Munthu wina<br>5. Ndilibe ana<br>88.Sindikufuna kuyankha          |
| f15b | (Ngati yankho ndi 4) Amapanga chiganizo ndi ndani?                                                            | _____                                                                                                                              |
| f16  | Kodi amapanga ziganizo zogula katundu mkulumkulu wapakhomo panu ndi ndani?                                    | 1. Ine<br>2. Mogwirizana<br>3. Nthawi zambiri bwenzi langa                                                                         |

|       |                                                                                                                                                                                                                                                                                                                                                                                                                                                                                                                                                                                                                                                                                                                  |                                                             |
|-------|------------------------------------------------------------------------------------------------------------------------------------------------------------------------------------------------------------------------------------------------------------------------------------------------------------------------------------------------------------------------------------------------------------------------------------------------------------------------------------------------------------------------------------------------------------------------------------------------------------------------------------------------------------------------------------------------------------------|-------------------------------------------------------------|
|       |                                                                                                                                                                                                                                                                                                                                                                                                                                                                                                                                                                                                                                                                                                                  | 4. Munthu wina<br>5. Ndilibe ana<br>88.Sindikufuna kuyankha |
| f16b  | (Ngati yankho ndi 4) Amapanga chiganizo ndani?                                                                                                                                                                                                                                                                                                                                                                                                                                                                                                                                                                                                                                                                   |                                                             |
| Note  | Ndikufuna ndikufunsemi zokhudzana za (Kuthekela/mwayi) kuti zinthu zina zichitike. Muli nyemba mu kapu. Ndikufunsemi kuti musankhe zina mwa nyemba ndipo muyike mu mbale. Mulingo wa nyemba omwe muyike mu mbale udzafanizira kuti chinachake chichitika. Nyemba imodzi ikusonyeza kuti mwayi ndiochepa kuti chinachake chichitika. Ngati simuika nyemba mm' bale ndekuti mukutsimikiza kuti palibe mwayi oti chinachake chichitika                                                                                                                                                                                                                                                                              |                                                             |
| note2 | Ngati muyike nyemba zowonjezera mu mbale, zikutanthauza kuti mwayi oti chinachake chichitika uchuluka, mwachitsanzo ngati muyika nyemba imodzi kapena ziwiri mwayi oti chinachake chichitika. Ngakhale pali mwayi ochepa koma chinachake chichitika. Ngati muyike nyemba nkhumu zikutanthauza kuti pali mwayi ofanana oti chinachake chichika kapena ayi. Ngati muyike nyemba zisanu ndi imodzi zikutanthauza kuti mwayi woti chinachake chichitika uli ochulukilapo kuposa mwayi oti chinachake sichichitika. Ngati muyike nyemba zonse khumi ndekuti muli ndi chikhulupiliro chonse kuti chinachake chichitikadi pavute pasavute. Palibe yankho lokhonza kapena lolakwa ndikungofuna kudziwa zomwe mukuganiza. |                                                             |



|          |                                                                                                                                                                                                                                          |                  |
|----------|------------------------------------------------------------------------------------------------------------------------------------------------------------------------------------------------------------------------------------------|------------------|
| note3    | Ofunsa: Pelekani yankho lanu pa funso lililonse nambala ya nyemba zomwe lili m'bale. Pakutha pa funso lililonse, bwezeletsani nyemba pa tebulo.                                                                                          |                  |
| Practice |                                                                                                                                                                                                                                          |                  |
| pr1      | Sankhani mulingo wa nyemba omwe ukhale ndi kuthekela kumene mukuganiza kuti:                                                                                                                                                             | _____            |
| pr1b     | Mupita ku msika mosachepera kamodzi m'masiku awiri akudzawa                                                                                                                                                                              | _____            |
| pr1c     | Mupita ku msika mosachepera kamodzi m'masabata awiri akudzawa.                                                                                                                                                                           | _____            |
| Practice |                                                                                                                                                                                                                                          |                  |
| pr2      | Ofunsa: kodi oyankha anawonjezera nyamba pakati pa pr1b ndi pr1c                                                                                                                                                                         | 2. Eya<br>0. Ayi |
| pr3      | Kumbukurani kuti pamene nthawi ikupita muzipeza mpata wambiri opita kunsika. Choncho, munayenela kuti mwaika nyemba zambiri m'bale<br><br>Kodi mukuganiza kuti kumsika mupita mosachepela kamodzi bwanji mu nyengo ya ma sabata awiriwa? | _____            |
| f17      | Sankhani mlingo wa nyemba umene ufanizile kaganidwe kanu:                                                                                                                                                                                |                  |
| f17b     | Mukhalabe mukanali pa banja/ndi (bwenzi oposela chaka chimodzi kuchoka pano                                                                                                                                                              | _____            |
| f17c     | Mudzadwala mu miyezi khumi ndi iwiri ikubwelayi                                                                                                                                                                                          | _____            |
| f17d     | Mudzayamba kumwa ma ARV mu miyezi itatu ikubwelayi                                                                                                                                                                                       | _____            |

|                                           |                                                                                                                                                                 |                                                                                                                                                                                                                |
|-------------------------------------------|-----------------------------------------------------------------------------------------------------------------------------------------------------------------|----------------------------------------------------------------------------------------------------------------------------------------------------------------------------------------------------------------|
| f17e                                      | Mudzadziwitsa achibale ndi anzanu za zotsatira zanu za HIV m'miyezi itatu ikubwelayi                                                                            | _____                                                                                                                                                                                                          |
| f17c                                      | Mukusafuna kwanu, anzanu ndi abale azadziwa kuti muli ndi HIV, mu miyezi itatu yapitayi.                                                                        | _____                                                                                                                                                                                                          |
| <b>SELF REPORTED HEALTH AND HAPPINESS</b> |                                                                                                                                                                 |                                                                                                                                                                                                                |
| Intro Note                                | Pa nthawi ino ndikufuna ndikambe nanu zokhudza umoyo ndi chisangalalo chanu.                                                                                    |                                                                                                                                                                                                                |
| e1                                        | Ndili ndi chidwi ndi mukudziwa za umoyo ndi kukhutitsidwa kwanu. Kodi muli okhutitsidwa bwanji ndi moyo wanu, pakutengela zonse.                                | <ol style="list-style-type: none"> <li>6. Okhutitsidwa kwamburi</li> <li>7. Okhutitsidwa pang'ono</li> <li>8. Pakatikati</li> <li>9. Okhutitsidwa pang'ono</li> <li>10. Osakhutitsidwa olo pang'ono</li> </ol> |
| e2                                        | Kodi mukuona ngati muli okhutitsidwa mofanana kapena osakhutitsidwa pang'ono mosaposela anthu ena a muna kapena akazi a msinkhu wanu ndi opezeka m'mudzi mwanu? | <ol style="list-style-type: none"> <li>1. Okhutitsidwa kwambiri</li> <li>2. Okhutitsidwa</li> <li>3. Okhutitsidwa pang'ono</li> </ol>                                                                          |
| e3                                        | Kutengela zonse, Kodi munganene kuti umoyo wanu tsopano uli bwino kwambiri, ulibwino, sulibwino, suli bwino olo pang'ono                                        | <ol style="list-style-type: none"> <li>1. Bwino kwambiri</li> <li>2. Bwino</li> <li>3. Silibwino</li> <li>4. Silibwino olo pang'ono</li> </ol>                                                                 |
| e4                                        | Kodi mungazifananzile bwanji za thanzi lanu ndi la anthu ena a msikhu ofanana ndi wanu, amuna kapena akazi a m'mudzi mwanu.                                     | <ol style="list-style-type: none"> <li>1. A thanzi kwambiri</li> <li>2. A thanzi</li> <li>3. Nthanzi lochepekela</li> </ol>                                                                                    |
| e5                                        | Kodi mwezi wathawu, ndi masiku angati omwe munadwara kwambiri ofika kukulepheretsani kugwira nthito/kupita ku sukulu/kugwira nthito za pa khomo                 | _____                                                                                                                                                                                                          |
| <b>Happiness</b>                          |                                                                                                                                                                 |                                                                                                                                                                                                                |
| e6                                        | Kodi ziganizo izi ndi zowona bwanji kwa inu?                                                                                                                    |                                                                                                                                                                                                                |
| e6_1                                      | Ndinali ndi nkhwana                                                                                                                                             | 1. Ndikugwirizana nazo kwambiri                                                                                                                                                                                |

|                                   |                                                                                                                                             |                                                                                                                                                                                                                                                                     |
|-----------------------------------|---------------------------------------------------------------------------------------------------------------------------------------------|---------------------------------------------------------------------------------------------------------------------------------------------------------------------------------------------------------------------------------------------------------------------|
|                                   |                                                                                                                                             | <ol style="list-style-type: none"> <li>2. Ndikugwirizana nazo</li> <li>3. Sindikugwirizana nazo</li> <li>4. Sindikugwirizana nazo kwambiri</li> </ol>                                                                                                               |
| e6_2                              | Ndimanva ngati moyo wafika                                                                                                                  | <ol style="list-style-type: none"> <li>1. Ndikugwirizana nazo kwambiri</li> <li>2. Ndikugwirizana nazo</li> <li>3. Sindikugwirizana nazo</li> <li>4. Sindikugwirizana nazo kwambiri</li> </ol>                                                                      |
| e6_3                              | Ndimanva kukhutitsidwa                                                                                                                      | <ol style="list-style-type: none"> <li>1. Ndikugwirizana nazo kwambiri</li> <li>2. Ndikugwirizana nazo</li> <li>3. Sindikugwirizana nazo</li> <li>4. Sindikugwirizana nazo kwambiri</li> </ol>                                                                      |
| e6_4                              | Ndimanva kusolidwa                                                                                                                          | <ol style="list-style-type: none"> <li>1. Ndikugwirizana nazo kwambiri</li> <li>2. Ndikugwirizana nazo</li> <li>3. Sindikugwirizana nazo</li> <li>4. Sindikugwirizana nazo kwambiri</li> </ol>                                                                      |
| <b>GENDER EQUITABLE MEN SCALE</b> |                                                                                                                                             |                                                                                                                                                                                                                                                                     |
| Note                              | Chonde ndiuzeni ngati mukugwirizana nazo kwabiri, mukugwirizana nazo, simukugwirizana nazo, simukugwirizana nazo olo pang'ono ziganizo izi: |                                                                                                                                                                                                                                                                     |
| j1                                | Udindo ofunikila wa mzimayi ndi kusamala khomo lake ndi kuphika.                                                                            | <ol style="list-style-type: none"> <li>1. Ndikugwirizana nazo kwambiri</li> <li>2. Ndikugwirizana nazo</li> <li>3. Sindikukhulupilira</li> <li>4. Sindikugwirizana nazo</li> <li>5. Sindikugwirizana nazo olo pang'ono</li> <li>88. Sindikufuna kuyankha</li> </ol> |
| j2                                | Abambo amafuna kugonana kuposa amayi                                                                                                        | <ol style="list-style-type: none"> <li>1. Ndikugwirizana nazo kwambiri</li> <li>2. Ndikugwirizana nazo</li> <li>3. Sindikukhulupilira</li> <li>4. Sindikugwirizana nazo</li> </ol>                                                                                  |

|    |                                                                          |                                                                                                                                                                                     |
|----|--------------------------------------------------------------------------|-------------------------------------------------------------------------------------------------------------------------------------------------------------------------------------|
|    |                                                                          | 5. Sindikugwirizana nazo olo pang'ono<br>88. Sindikufuna kuyankha                                                                                                                   |
| j3 | Azibambo sakonda kukambirana za kugonana amangochita                     | 1. Ndikugwirizana nazo kwambiri<br>2. Ndikugwirizana nazo<br>3. Sindikukhulupilira<br>4. Sindikugwirizana nazo<br>5. Sindikugwirizana nazo olo pang'ono<br>88. Sindikufuna kuyankha |
| j4 | Nthawi zina mzimayi amayenela kumenyedwa.                                | 1. Ndikugwirizana nazo kwambiri<br>2. Ndikugwirizana nazo<br>3. Sindikukhulupilira<br>4. Sindikugwirizana nazo<br>5. Sindikugwirizana nazo olo pang'ono<br>88. Sindikufuna kuyankha |
| j5 | Kusinta matewela, kusambitsa mwana, kudyetsa mwana ndi udindo wa mzimayi | 1. Ndikugwirizana nazo kwambiri<br>2. Ndikugwirizana nazo<br>3. Sindikukhulupilira<br>4. Sindikugwirizana nazo<br>5. Sindikugwirizana nazo olo pang'ono<br>88. Sindikufuna kuyankha |
| j6 | Ndi udindi wa mzimayi kupewa kutenga mimba.                              | 1. Ndikugwirizana nazo kwambiri<br>2. Ndikugwirizana nazo<br>3. Sindikukhulupilira<br>4. Sindikugwirizana nazo<br>5. Sindikugwirizana nazo olo pang'ono<br>88. Sindikufuna kuyankha |
| j7 | Mzibambo ayenela kukhala ndi chiganizo chomaliza cha mnyumba mwake.      | 1. Ndikugwirizana nazo kwambiri<br>2. Ndikugwirizana nazo<br>3. Sindikukhulupilira<br>4. Sindikugwirizana nazo                                                                      |

|      |                                                                                         |                                                                                                                                                                                                                |
|------|-----------------------------------------------------------------------------------------|----------------------------------------------------------------------------------------------------------------------------------------------------------------------------------------------------------------|
|      |                                                                                         | <p>5. Sindikugwirizana nazo olo pang'ono</p> <p>88. Sindikufuna kuyankha</p>                                                                                                                                   |
| j8   | Azibambo amakhala okonzeka ku gonana                                                    | <p>1. Ndikugwirizana nazo kwambiri</p> <p>2. Ndikugwirizana nazo</p> <p>3. Sindikukhulupilira</p> <p>4. Sindikugwirizana nazo</p> <p>5. Sindikugwirizana nazo olo pang'ono</p> <p>Sindikufuna kuyankha</p>     |
| j9   | Mzimayi akuyenela kulekelela nkhaza kuti asunge banja lake.                             | <p>1. Ndikugwirizana nazo kwambiri</p> <p>2. Ndikugwirizana nazo</p> <p>3. Sindikukhulupilira</p> <p>4. Sindikugwirizana nazo</p> <p>5. Sindikugwirizana nazo olo pang'ono</p> <p>Sindikufuna kuyankha</p>     |
| j10a | Ndikhoza kukwiya akaza anga atati andiuze kuti ndigwiritse ntchito kondumu.             | <p>1. Ndikugwirizana nazo kwambiri</p> <p>2. Ndikugwirizana nazo</p> <p>3. Sindikukhulupilira</p> <p>4. Sindikugwirizana nazo</p> <p>5. Sindikugwirizana nazo olo pang'ono</p> <p>88. Sindikufuna kuyankha</p> |
| j10b | Azibambo akhoza kukwiya akazi awo atawauza kuti agwiritse ntchito kondumu               | <p>1. Ndikugwirizana nazo kwambiri</p> <p>2. Ndikugwirizana nazo</p> <p>3. Sindikukhulupilira</p> <p>4. Sindikugwirizana nazo</p> <p>5. Sindikugwirizana nazo olo pang'ono</p> <p>88. Sindikufuna kuyankha</p> |
| j11  | Mzimayi komanso nzibambo agwirizane limodzi kuti agwiritse ntchito njira yanji yakulela | <p>1. Ndikugwirizana nazo kwambiri</p> <p>2. Ndikugwirizana nazo</p> <p>3. Sindikukhulupilira</p> <p>4. Sindikugwirizana nazo</p>                                                                              |

|      |                                                                                             |                                                                                                                                                                                                                                                                |
|------|---------------------------------------------------------------------------------------------|----------------------------------------------------------------------------------------------------------------------------------------------------------------------------------------------------------------------------------------------------------------|
|      |                                                                                             | 5. Sindikugwirizana nazo olo pang'ono<br>88. Sindikufuna kuyankha                                                                                                                                                                                              |
| j12  | Sindingakhale ndi nzanga wopanga zamathanyula                                               | 1. Ndikugwirizana nazo kwambiri<br>2. Ndikugwirizana nazo<br>3. Sindikukhulupilira<br>4. Sindikugwirizana nazo<br>5. Sindikugwirizana nazo olo pang'ono<br>88. Sindikufuna kuyankha                                                                            |
| j13a | Ngati munthu angandinyoze, ndiziteza pogwiritsa ntchito mphanvu, ngati ndikufunika kutero.  | 1. Ndikugwirizana nazo kwambiri<br>2. Ndikugwirizana nazo<br>3. Sindikukhulupilira<br>4. Sindikugwirizana nazo<br>5. Sindikugwirizana nazo olo pang'ono<br>88. Sindikufuna kuyankha                                                                            |
| j13b | Ngati munthu anganyoze mzibambo, aziteze pogwiritsa ntchito mphanvu ngati akufunika kutelo. | 1. Ndikugwirizana nazo kwambiri<br>2. Ndikugwirizana nazo<br>3. Sindikukhulupilira<br>4. Sindikugwirizana nazo<br>5. Sindikugwirizana nazo olo pang'ono<br>Sindikufuna kuyankha                                                                                |
| j14  | Kuti ukhale mzibambo ukufunika kukhala ovuta.                                               | 1. Ndikugwirizana nazo kwambiri<br>2. Ndikugwirizana nazo<br>3. Sindikukhulupilira<br>4. Sindikugwirizana nazo<br>5. Sindikugwirizana nazo olo pang'ono<br>Sindikufuna kuyankha<br>Sindikugwirizana nazo kwambiri<br>88. Refuse to say<br>Sindikufuna kuyankha |
| j15  | Azibambo akuyenela kunva manyazi ngati akukanika kutota                                     | 1. Ndikugwirizana nazo kwambiri<br>2. Ndikugwirizana nazo                                                                                                                                                                                                      |

|     |                                                                                     |                                                                                                                                                                                                                |
|-----|-------------------------------------------------------------------------------------|----------------------------------------------------------------------------------------------------------------------------------------------------------------------------------------------------------------|
|     |                                                                                     | <p>3. Sindikukhulupilira</p> <p>4. Sindikugwirizana nazo</p> <p>5. Sindikugwirizana nazo olo pang'ono</p> <p>88. Sindikufuna kuyankha</p>                                                                      |
| j16 | Ngati mzibambo wapeleka mimba kwa mzimayi, mwanayo ndi udindo wa anthu onse a wiri. | <p>1. Ndikugwirizana nazo kwambiri</p> <p>2. Ndikugwirizana nazo</p> <p>3. Sindikukhulupilira</p> <p>4. Sindikugwirizana nazo</p> <p>5. Sindikugwirizana nazo olo pang'ono</p> <p>88. Sindikufuna kuyankha</p> |
| j17 | Nzibambo akuyenela kudziwa zomwe bwenzi lake limakonda pogonana                     | <p>1. Ndikugwirizana nazo kwambiri</p> <p>2. Ndikugwirizana nazo</p> <p>3. Sindikukhulupilira</p> <p>4. Sindikugwirizana nazo</p> <p>5. Sindikugwirizana nazo olo pang'ono</p> <p>88. Sindikufuna kuyankha</p> |
| j18 | Kutenga nawo mbali kwa a bambo ndi kofunika polela mwana                            | <p>1. Ndikugwirizana nazo kwambiri</p> <p>2. Ndikugwirizana nazo</p> <p>3. Sindikukhulupilira</p> <p>4. Sindikugwirizana nazo</p> <p>5. Sindikugwirizana nazo olo pang'ono</p> <p>88. Sindikufuna kuyankha</p> |
| j19 | Ndi zofunika kuti abambo azikhala ndi anzawo okambilana nawo mavuto awo.            | <p>1. Ndikugwirizana nazo kwambiri</p> <p>2. Ndikugwirizana nazo</p> <p>3. Sindikukhulupilira</p> <p>4. Sindikugwirizana nazo</p> <p>5. Sindikugwirizana nazo olo pang'ono</p> <p>88. Sindikufuna kuyankha</p> |
| j20 | Banja lizigwirizana limodzi ngati likufuna kukhala ndi mwana                        | <p>1. Ndikugwirizana nazo kwambiri</p> <p>2. Ndikugwirizana nazo</p> <p>3. Sindikukhulupilira</p> <p>4. Sindikugwirizana nazo</p>                                                                              |

|                     |                                                                                                                                                                                                                                    |                                                                                                                                             |
|---------------------|------------------------------------------------------------------------------------------------------------------------------------------------------------------------------------------------------------------------------------|---------------------------------------------------------------------------------------------------------------------------------------------|
|                     |                                                                                                                                                                                                                                    | 5. Sindikugwirizana nazo olo pang'ono<br>88. Sindikufuna kuyankha                                                                           |
| <b>STIGMA</b>       |                                                                                                                                                                                                                                    |                                                                                                                                             |
| Note                | Mugawo lotsatila ndifuna tikambilane zokhudza maganizo anu a anthu omwe ali ndi HIV komanso akukhala mu dela lanu. Chonde khalani omasuka kuyankhula momasuka, palibe yankho lohoza kapena lolakwa. Ndikufuna ndinve maganizo anu. |                                                                                                                                             |
| i3                  | Ndikhoza kugula ndiwo zamasamba kwa munthu oti ndikudziwa kuti ali ndi HIV.                                                                                                                                                        | 1. Ndikugwirizana zano kwambiri<br>2. Ndikugwirizana nazo<br>3. Pakatikati<br>4. Sindikugwirizana nazo<br>5. Sindikugwirizana nazo kwambiri |
| i4                  | Ngati wachibale wanga angadwale AIDS, ndingavomele kumusamala pakhomo panga.                                                                                                                                                       | 1. Ndikugwirizana zano kwambiri<br>2. Ndikugwirizana nazo<br>3. Pakatikati<br>4. Sindikugwirizana nazo<br>5. Sindikugwirizana nazo kwambiri |
| i5                  | M'maganizo mwanga, ngati mphunzitsi wa mkazi ali ndi HIV koma sakudwala, aloledwe kupitiliza kuphunzitsa.                                                                                                                          | 1. Ndikugwirizana zano kwambiri<br>2. Ndikugwirizana nazo<br>3. Pakatikati<br>4. Sindikugwirizana nazo<br>5. Sindikugwirizana nazo kwambiri |
| <b>EXPECTATIONS</b> |                                                                                                                                                                                                                                    |                                                                                                                                             |



|            |                                                                                                                                                                                                                                                                                                                                                                                                                                    |       |
|------------|------------------------------------------------------------------------------------------------------------------------------------------------------------------------------------------------------------------------------------------------------------------------------------------------------------------------------------------------------------------------------------------------------------------------------------|-------|
| Intro Note | Ndikufuna ndikufunsemi zokhudzana za (Kuthekela/mwayi) kuti zinthu zina zichitike. Muli nyemba mu kapu. Ndikufunsemi kuti musankhe zina mwa nyemba ndipo muyike mu mbale. Mulingo wa nyemba omwe muyike mu mbale udzafanizira kuti chinachake chichitika. Nyemba imodzi ikusonyeza kuti mwayi ndiochepa kuti chinachake chichitika. Ngati simuika nyemba mm'bale ndekuti mukutsimikiza kuti palibe mwayi oti chinachake chichitika |       |
| h4         | Sankhani mulingo wa nyemba omwe ukhale ndi kuthekela kumene mukuganiza kuti:                                                                                                                                                                                                                                                                                                                                                       | _____ |
| h4b        | Mudzakhala mukudalila apabanja panu pa nkhani ya zachuma mu miyezi itatu ikubwelayi.                                                                                                                                                                                                                                                                                                                                               | _____ |
| h4c        | Mukhala mukuthandiza achibale ena pa nkhani za chuma miyezi itatu ikubweyi.                                                                                                                                                                                                                                                                                                                                                        | _____ |
| Note       | Kotsatira ndikufuna ndikufunsemi mafunse ochepa okhudza chiyembekezo chanu cha mtsogolo. Ndikudziwa palibe yemmwe amadziwa za mtsogolo koma tiyeni tikambe mongoyelezeka.                                                                                                                                                                                                                                                          |       |
| h5         | Mu chaka chamawa chiyembekezere choti mudzakhala mu:                                                                                                                                                                                                                                                                                                                                                                               |       |
| h5a        | Mudzakhala mutayamba sukulukuchoka lelo chaka chamawa                                                                                                                                                                                                                                                                                                                                                                              | _____ |
| h5b        | Kuyamba buzinesi                                                                                                                                                                                                                                                                                                                                                                                                                   | _____ |
| h5c        | Kutsegula akaunti ku banki                                                                                                                                                                                                                                                                                                                                                                                                         | _____ |
| h5d        | Ku gula malo?                                                                                                                                                                                                                                                                                                                                                                                                                      | _____ |

|                     |                                                                                                                                        |                                  |
|---------------------|----------------------------------------------------------------------------------------------------------------------------------------|----------------------------------|
| h5e                 | Kusunga ndalama?                                                                                                                       | _____                            |
| h5f                 | Kukhala ndi chakudya chochepa?                                                                                                         | _____                            |
| h5g                 | Kukhala pa ntchito yokhazikika                                                                                                         | _____                            |
| Tested for HIV      |                                                                                                                                        |                                  |
| pd2                 | Mwayezetsapo HIV kokwana kangati?<br><i>Enter "-99" if client doesn't remember</i>                                                     | _____                            |
| pd3                 | Komaliza munayezetsa HIV kanali liti?                                                                                                  | a) Chaka _____<br>b) Mwezi _____ |
| pd5                 | Ganizani za ulendo wanu ayamba olandira zotsatira zakuyezadwa kwa HIV. Koyamba kulandira zotsatira zoti akupezani ndi HIV kanali liti? | a) Chaka _____<br>b) Mwezi _____ |
| pd6                 | Have you ever initiated ART?<br>Munayamba mwamapo ma ARV?                                                                              | 2. Eya<br>0. Ayi                 |
| First Initiated ART |                                                                                                                                        |                                  |
| pd6b                | Koyamba kumwa ma ARV kanali liti?                                                                                                      | c. Chaka _____<br>d. Mwezi _____ |
| pd7                 | Munayamba mwachedwako kukatenga mwankhwala masiku ochepela khumi ndi folo?                                                             | 1. Eya<br>0. Ayi                 |
| pd7b                | Masiku angati?                                                                                                                         | _____                            |
| Pd7c                | Munasiya kumwa ma ARV chifukwa chani?                                                                                                  | _____<br>_____                   |
| pd8                 | Mukudziwa munthu wina aliyense                                                                                                         |                                  |

|      |                                                                                                                      |                                                                                                                                                                                                                                                                                                                                                                              |
|------|----------------------------------------------------------------------------------------------------------------------|------------------------------------------------------------------------------------------------------------------------------------------------------------------------------------------------------------------------------------------------------------------------------------------------------------------------------------------------------------------------------|
|      | yenwe akumwa ma ARV?                                                                                                 | <ol style="list-style-type: none"> <li>1. Eya</li> <li>0. Ayi</li> </ol>                                                                                                                                                                                                                                                                                                     |
| pd8b | <p>Pano ganizani za munthu yemwe akumwa ma ARV amene mulinali pafupi</p> <p>Mumayankhula naye mowilikiza bwanji?</p> | <ol style="list-style-type: none"> <li>1. Siku ndi tsiku</li> <li>2. Kangapo pa sabata</li> <li>3. Kamodzi pa sabata</li> <li>4. Kangapo pa sabata</li> <li>5. Kamodzi kamwezi</li> <li>6. Kochepera kamodzi pa mwezi</li> <li>7. Sitiyankhulana</li> </ol>                                                                                                                  |
| pd9  | Munayamba mwaululapo za momwe nthupi mwanu mulili za HIV kwa anthu ena kupatura bwenzi lanu?                         | <ol style="list-style-type: none"> <li>1. Eya</li> <li>1. Ayi</li> </ol>                                                                                                                                                                                                                                                                                                     |
| pd9b | <p>Wina munamuza anali ndani?</p> <p><i>Mark all that apply</i></p>                                                  | <ol style="list-style-type: none"> <li>1. Ntchemwali</li> <li>2. Ntchimwene</li> <li>3. Bambo anga</li> <li>4. Mayi anga</li> <li>5. Malume</li> <li>6. Azakhali anga</li> <li>7. Nzanga</li> <li>8. Apongozi akazi</li> <li>9. Apongozi amuna</li> <li>10. Ana anga</li> <li>11. Ogwira naye ntchito</li> <li>12. Bwezi logonanalo</li> <li>13. Zina, fotokozani</li> </ol> |
| pd10 | Pa munthu yemwe munamuwuzwa, ndi ndani yemwe mumayankhula naye kawirikawiri?                                         | <ol style="list-style-type: none"> <li>1. Ntchemwali</li> <li>2. Ntchimwene</li> <li>3. Bambo anga</li> <li>4. Mayi anga</li> <li>5. Malume</li> <li>6. Azakhali anga</li> <li>7. Nzanga</li> <li>8. Apongozi akazi</li> <li>9. Apongozi amuna</li> <li>10. Ana anga</li> <li>11. Ogwira naye ntchito</li> <li>12. Bwezi logonanalo</li> </ol> <p>Zina, fotokozani</p>       |

|                                        |                                                                                                                                                                                         |                                                                                                                                                                                                                                                                                                                      |
|----------------------------------------|-----------------------------------------------------------------------------------------------------------------------------------------------------------------------------------------|----------------------------------------------------------------------------------------------------------------------------------------------------------------------------------------------------------------------------------------------------------------------------------------------------------------------|
| pd10c                                  | Muntjuyi mumayankhula naye mowirikiza bwani?                                                                                                                                            | <ol style="list-style-type: none"> <li>1. Tsiku ndi tsiku</li> <li>2. Kangapo pa sabata</li> <li>3. Kamodzi pa sabata</li> <li>4. Kangapo pa mwezi</li> <li>5. Kamodzi pa mwezi</li> <li>6. Kochepera kamodzi pa mwezi</li> <li>7. Sitiyankhulana</li> </ol>                                                         |
| <b>PREVIOUS USE OF HEALTH SERVICES</b> |                                                                                                                                                                                         |                                                                                                                                                                                                                                                                                                                      |
| Intro Note                             | Pa ntahwi ino ndifuna tikambilane zokhudza za zomwe mwadutsamo pogwiritsa ntchito thandizo la za umoyo pa chipatala.                                                                    |                                                                                                                                                                                                                                                                                                                      |
| h1                                     | Munayamba mwapitako ku chipatala miyezi khumi ndi iwiri yapitayi.(chifukwa cha inu kapena kupelekeza munthu wina)?                                                                      | <ol style="list-style-type: none"> <li>1. Eya</li> <li>0. Ayi</li> </ol>                                                                                                                                                                                                                                             |
| h2                                     | Mwapita ku chipatala kangati miyezi khumi ndi iwiri yapitayi?                                                                                                                           | _____                                                                                                                                                                                                                                                                                                                |
| h3                                     | Pa nthawi ino ganizani za inu. Mwapita kangati ku chipatala miyezi khumi ndi awiri yapitayi panokha kukalandira thandizo la zaumoyo?                                                    | _____                                                                                                                                                                                                                                                                                                                |
| h_a1                                   | <p>Komaliza kupita kuchipatala(chaka) chifukwa mwadwala ndinu kanali liti?</p> <p>NOTE: PUT WHAT YEAR. (i.e., 2015). If DO NOT REMEMBER, help them estimate. IF NEVER GONE, put -99</p> | _____                                                                                                                                                                                                                                                                                                                |
| h4                                     | Munalandira thandizo lanji ulendo umaliza munapita kuchipatala?                                                                                                                         | <ol style="list-style-type: none"> <li>12. ANC</li> <li>13. Family Planning</li> <li>14. Delivery</li> <li>15. Post-natal</li> <li>16. Under Five<br/>Ku ana</li> <li>17. Kukayezetsa HIV</li> <li>18. ARV</li> <li>19. (OPD) Kudwala</li> <li>20. (OPD)Kuvulala</li> <li>21. Kukonana ndi dotolo wa manu</li> </ol> |

|      |                                                                                                                     |                                                                                                                                                                                                                  |
|------|---------------------------------------------------------------------------------------------------------------------|------------------------------------------------------------------------------------------------------------------------------------------------------------------------------------------------------------------|
|      |                                                                                                                     | 22. Palibe                                                                                                                                                                                                       |
| h_a2 | Tsopano ganizani za kachiwiri komwe munapita kuchipatala nokha cha posachedwapa. Munapita ku chiptala chaka chanji? | _____                                                                                                                                                                                                            |
| c3   | Chonde ganizani za ulendo wanu munapita kuchipatala chaposachedwa, kuphatikizapo lelo. Munapita lelo?               | c. Chaka _____<br>d. Mwezi _____<br>Mwezi                                                                                                                                                                        |
| c4   | Munapita ku chipatala chiti                                                                                         | 1. Chipatala chomwe mumapita pakali pano<br>2. Chipatala china, tchulani                                                                                                                                         |
| c5   | Munapita kukalandila thandizo lanji ku chipatala?                                                                   | 1. ANC<br>2. Family Planning<br>3. Delivery<br>4. Post-natal<br>5. Under Five<br>Ku ana<br>6. Kukayezetsa HIV<br>7. ARV<br>8. (OPD) Kudwala<br>9. (OPD)Kuvulala<br>10. Kukonana ndi dotolo wa manu<br>11. Palibe |
| c5b  | Amene analandira thandizo la zaumoyo anali ndani?                                                                   | 1. Ineyo<br>2. Mwana wanga<br>3. Bwenzi langa<br>4. Wapabanja panga<br>5. Mzanga<br>99. Zina, fotokozani _____                                                                                                   |
| c6a  | Inu kapena munthu yemwe munapita naye kuchipatala analandila munthu wina wathandizo la zaumoyo?                     | 2. Eya<br>0. Ayi                                                                                                                                                                                                 |
| c6   | Thandizo lachiwiri la zaumyo lomwe manalandira linali lanji?                                                        | 1. ANC<br>2. Family Planning<br>3. Delivery<br>4. Post-natal<br>5. Under Five<br>Ku ana<br>6. Kukayezetsa HIV<br>7. ARV<br>8. (OPD) Kudwala                                                                      |

|                      |                                                                                                                                                                                                                                                           |                                                                                                                           |
|----------------------|-----------------------------------------------------------------------------------------------------------------------------------------------------------------------------------------------------------------------------------------------------------|---------------------------------------------------------------------------------------------------------------------------|
|                      |                                                                                                                                                                                                                                                           | <p>9. (OPD)Kuvulala</p> <p>10. Kukonana ndi dotolo wa manu</p> <p>11. Palibe</p>                                          |
| c6b                  | Analandira thandizo la zaumoyo anali ndani?                                                                                                                                                                                                               | <p>1. Ine</p> <p>2. Mwana wanga</p> <p>3. Bwezi langa</p> <p>4. Wapabanja panga</p> <p>5. Nzanga Zina, fotokozani</p>     |
| Service Satisfaction |                                                                                                                                                                                                                                                           |                                                                                                                           |
| c10                  | Pa nthawi ino ndikufuna ndikufunsi za kukhutila kwanu ndi thandizo la zaumoyo munalandila pa tsikulo. Chinde nduuzeni ngai zina mwazotsatirazi zinli vito kwa inu patsiku lomwe munapita kuchipatala, ngati eya, ngati vutolo linali lalikulu kapena ayi. |                                                                                                                           |
| c10_1                | Nthawi yomwe mumafuna kuonana ndi dotolo                                                                                                                                                                                                                  | <p>1. Vuto kwambiri</p> <p>2. Vuto pang'ono</p> <p>3. Silinali vuto</p> <p>88. Not applicable</p> <p>98. Sindikudziwa</p> |
| c10_2                | Kuthekela kokambilana za mavuto anu a pakati.                                                                                                                                                                                                             | <p>1. Vuto kwambiri</p> <p>2. Vuto pang'ono</p> <p>0. Silinali vuto</p> <p>88. Not applicable</p> <p>98. Sindikudziwa</p> |
| c10_3                | Mulingo waku Kufotokozeledwa munalandira okhudza vuto lanu kapena thandizo.                                                                                                                                                                               | <p>1. Vuto kwambiri</p> <p>2. Vuto pang'ono</p> <p>0. Silinali vuto</p> <p>88. Not applicable</p> <p>98. Sindikudziwa</p> |
| c10_4                | Chinsinsi kuopetsa ena kuwona zotsatila za umoyo                                                                                                                                                                                                          | <p>1. Vuto kwambiri</p> <p>2. Vuto pang'ono</p> <p>0. Silinali vuto</p> <p>88. Not applicable</p> <p>98. Sindikudziwa</p> |

|        |                                                                                     |                                                                                                                        |
|--------|-------------------------------------------------------------------------------------|------------------------------------------------------------------------------------------------------------------------|
| c10_5  | Chinsinsi kuopa ena kunva za zokambilana zanu                                       | 1. Vuto kwambiri<br>2. Vuto pang'ono<br>0. Silinali vuto<br><br>88. Not applicable<br>98. Sindikudziwa                 |
| c10_6  | Kupezeka kwa mankwala mzipatala                                                     | 1. Vuto kwambiri<br>2. Vuto pang'ono<br>0. Silinali vuto<br><br>88. Not applicable<br>98. Sindikudziwa                 |
| c10_7  | Ma ola omwe thandizo limapelekedwa pa chipatala i.e thawi yotsegulila ndi yotsekela | 1. Vuto kwambiri<br>2. Vuto pang'ono<br>0. Silinali vuto<br><br>88. Not applicable<br>98. Sindikudziwa                 |
| c10_8  | Masiku omwe mumalandila thandizo                                                    | 1. Vuto kwambiri<br>2. Vuto pang'ono<br>0. Silinali vuto<br><br>88. Not applicable<br>98. Sindikudziwa<br>Sindikudziwa |
| c10_9  | Ukhondo wa pa chipatala                                                             | 1. Vuto kwambiri<br>2. Vuto pang'ono<br>0. Silinali vuto<br><br>88. Not applicable<br>98. Sindikudziwa                 |
| c10_10 | Momwe ogwira ntchito amakusamalilani                                                | 1. Vuto kwambiri<br>2. Vuto pang'ono<br>0. Silinali vuto<br><br>88. Not applicable<br>98. Sindikudziwa                 |
| c10_11 | Mtengo wa thandizo ndi mankwala                                                     | 1. Vuto kwambiri<br>2. Vuto pang'ono<br>1. Silinali vuto<br><br>88. Not applicable<br>98. Sindikudziwa                 |

| Satisfaction       |                                                                                                                         |                                                                                                                                                                                                                                                                                                     |
|--------------------|-------------------------------------------------------------------------------------------------------------------------|-----------------------------------------------------------------------------------------------------------------------------------------------------------------------------------------------------------------------------------------------------------------------------------------------------|
| c11                | Ndi chiganizo chiti chomwe chikufotokoza za maganizo anu okhudza thandizo lomwe munalandila pa chipatala?               | <ol style="list-style-type: none"> <li>1. Ndili okhutitsidwa kwabiri ndi thandizo ndinalandila.</li> <li>2. Ndili okhutitsidwa ndi thandizo ndinalandila.</li> <li>3. Sindili okhutitsidwa ndi thandizo ndinalandila</li> <li>4. Sindili okhutitsidwa kwambiri ndi thandizo ndinalandila</li> </ol> |
| c12                | Munatchulako za chipatalachi kwa nzanu kapena wachibale?                                                                | <ol style="list-style-type: none"> <li>2. Eya</li> <li>0. Ayi</li> </ol>                                                                                                                                                                                                                            |
| Comment            | Tafika pamapeto a kucheza kwathu. Zikomo chifukwa cha nthawi yanu. Pali chili chonse mukufuna kuwonjezera?              |                                                                                                                                                                                                                                                                                                     |
| End Note           | Thank the participant for their time and give them transport reimbursement, if they did not come for an ART appointment |                                                                                                                                                                                                                                                                                                     |
| Comments           | Enumerator comments                                                                                                     |                                                                                                                                                                                                                                                                                                     |
| End of the survey! |                                                                                                                         |                                                                                                                                                                                                                                                                                                     |



**14.6. APPENDIX F: Baseline survey – Female**

---

**BASELINE SURVEY**  
**Identifying efficient linkage strategies for HIV self-testing (IDEaL)**  
Female

---

| INTRODUCTION SECTION |                          |  |
|----------------------|--------------------------|--|
| interviewer          | Full Name of Interviewer |  |
| Interview date       | Interview date           |  |
|                      |                          |  |
| Time start           | Time survey started      |  |
| District             | District                 |  |
| Facility             | Facility                 |  |
| ID                   | ID                       |  |

| SECTION A: DEMOGRAPHICS |                                                                                                                                                                                     |                                                                                                                                                                                                                                |
|-------------------------|-------------------------------------------------------------------------------------------------------------------------------------------------------------------------------------|--------------------------------------------------------------------------------------------------------------------------------------------------------------------------------------------------------------------------------|
| Intro Note              | Thank you for agreeing to participate. Now I will ask you a few questions about yourself and who you are. Please feel free to answer honestly. There are no right or wrong answers. |                                                                                                                                                                                                                                |
| a7                      | What is your tribe?                                                                                                                                                                 | <ol style="list-style-type: none"> <li>1. Lomwe</li> <li>2. Sena</li> <li>3. Chewa</li> <li>4. Mang'anja/Nyanja</li> <li>5. Ngoni</li> <li>6. Tumbuka</li> <li>7. Tonga</li> <li>8. Yao</li> <li>99. Other, specify</li> </ol> |
| a3                      | What is the highest level of school you attended?                                                                                                                                   | <ol style="list-style-type: none"> <li>1. Primary</li> <li>2. Secondary</li> <li>3. Higher</li> </ol>                                                                                                                          |
| a3b                     | What class did you complete in your highest level of school?                                                                                                                        | _____                                                                                                                                                                                                                          |
| a4                      | Please think of the past 12 months, how would you describe your primary occupation?                                                                                                 | <ol style="list-style-type: none"> <li>1. Working formally (employed full time)</li> <li>2. Working informally (ganyu, farming, business)</li> <li>3. Not working</li> </ol>                                                   |
| a5                      | Are you currently married?                                                                                                                                                          | <ol style="list-style-type: none"> <li>1. Married</li> <li>2. Live-in partner</li> <li>3. Steady Boyfriend</li> <li>4. Separated</li> <li>5. Divorced</li> </ol>                                                               |

|                                    |                                                                                                                                                                                                                             |                                                                                                                |
|------------------------------------|-----------------------------------------------------------------------------------------------------------------------------------------------------------------------------------------------------------------------------|----------------------------------------------------------------------------------------------------------------|
|                                    |                                                                                                                                                                                                                             | 99. Other, specify                                                                                             |
| a6                                 | How many living children do you have?                                                                                                                                                                                       | _____                                                                                                          |
| a6b                                | What is the age of your <u>youngest</u> child?                                                                                                                                                                              | _____                                                                                                          |
| a6bc                               | What age is the child (in years or months)                                                                                                                                                                                  | _____                                                                                                          |
| a4b                                | How many children currently live with you?                                                                                                                                                                                  | _____                                                                                                          |
| a7                                 | How many sexual partners have you had in the past 12 months?                                                                                                                                                                | _____                                                                                                          |
| a8                                 | Have you had sex with someone besides your husband without a condom in the past 12 months?                                                                                                                                  | 2. Yes<br>0. No<br>88. Don't know/ Not sure<br>89. Refused to answer                                           |
| a8b                                | Have you had sex without a condom in the past 12 months?                                                                                                                                                                    | 2. Yes<br>0. No<br>88. Don't know/ Not sure<br>89. Refused to answer                                           |
| <b>SECTION B: INCOME QUESTIONS</b> |                                                                                                                                                                                                                             |                                                                                                                |
| Intro Note                         | I will now discuss with you about the valuable items that you or your household possesses. As I will be chatting with you I will also some questions about money you have and activities that you indulge in to find money. |                                                                                                                |
| b1                                 | Please think of the past 12 months, how would you describe your primary occupation?                                                                                                                                         | 1. Working formally (employed full time)<br>2. Working informally (ganyu, farming, business)<br>3. Not working |

|                  |                                                                                                                                                                                           |                 |
|------------------|-------------------------------------------------------------------------------------------------------------------------------------------------------------------------------------------|-----------------|
| b1b              | Think about all the work you have done in the past month. How many days did you normally work this month that gave you pay?                                                               | _____           |
| b2               | Do you have any savings for the future, such as a bank account, savings group or cash?                                                                                                    | 2. Yes<br>0. No |
| Household Assets |                                                                                                                                                                                           |                 |
| b3               | Does your household have:<br><i>The respondent said that his/her household doesn't have any of the household assets. Please probe and ensure that this is correct before you proceed.</i> |                 |
| b3_1             | Metal Roof?                                                                                                                                                                               | 2. Yes<br>0. No |
| b3_2             | Electricity?                                                                                                                                                                              | 2. Yes<br>0. No |
| b3_3             | Paraffin lamp with no glass?                                                                                                                                                              | 2. Yes<br>0. No |
| b3_4             | A paraffin lamp?                                                                                                                                                                          | 2. Yes<br>0. No |
| b3_5             | A radio?                                                                                                                                                                                  | 2. Yes<br>0. No |
| b3_6             | A television?                                                                                                                                                                             | 2. Yes<br>0. No |
| b3_7             | A cellular phone?                                                                                                                                                                         | 2. Yes<br>0. No |
| b3_8             | A bed?                                                                                                                                                                                    | 2. Yes<br>0. No |
| b3_9             | A sofa set?                                                                                                                                                                               | 2. Yes<br>0. No |
| b3_10            | A table?                                                                                                                                                                                  | 2. Yes          |

|              |                                                                                   |                 |
|--------------|-----------------------------------------------------------------------------------|-----------------|
|              |                                                                                   | 0. No           |
| b3_11        | A refrigerator                                                                    | 2. Yes<br>0. No |
| b3_12        | Mattress?                                                                         | 2. Yes<br>0. No |
| b3_13        | Chair(s)?                                                                         | 2. Yes<br>0. No |
| b3_14        | Cattle?                                                                           | 2. Yes<br>0. No |
| b3_15        | Goat?                                                                             | 2. Yes<br>0. No |
| b3_16        | Sheep?                                                                            | 2. Yes<br>0. No |
| b3_17        | Pigs?                                                                             | 2. Yes<br>0. No |
| b3_18        | Donkey?                                                                           | 2. Yes<br>0. No |
| b3_19        | Chickens?                                                                         | 2. Yes<br>0. No |
| b3_20        | Other poultry?                                                                    | 2. Yes<br>0. No |
| b4           | In the past 30 days, have you drank beer?                                         | 2. Yes<br>0. No |
| b4b          | How many days in the past 30 days have you drank beer?                            | _____           |
| b4c          | How much money did you spend on beer the last time you went?                      | MWK:            |
| b4d          | In total, approximately how much money did you spend on beer in the past 30 days? | MWK:            |
| Relationship |                                                                                   |                 |

|                                                                            |                 |                                                                                |                                                                                                                                                                      |
|----------------------------------------------------------------------------|-----------------|--------------------------------------------------------------------------------|----------------------------------------------------------------------------------------------------------------------------------------------------------------------|
| 1<br>2<br>3<br>4<br>5<br>6                                                 | Intro Note      | Now I'd like to talk to you about your current sexual relationship             |                                                                                                                                                                      |
| 7<br>8<br>9<br>10<br>11                                                    | f8              | How long have you been/were you in a sexual relationship with your partner?    | Days _____<br>Months _____<br>Years _____                                                                                                                            |
| 12<br>13<br>14                                                             | f9              | Do you have children with your partner?<br>How many children?                  | _____                                                                                                                                                                |
| 15<br>16<br>17<br>18<br>19<br>20<br>21<br>22<br>23                         | f10             | How often do you currently talk to your partner?                               | 1. Everyday<br>2. A couple times a week<br>3. Once a week<br>4. A couple times a month<br>5. Once a month<br>6. Less than once a month<br>7. Not at all (never)      |
| 24<br>25<br>26<br>27<br>28<br>29                                           | f10b            | In a typical month, who earns more money? You, or your partner?                | 1. Myself<br>2. This partner<br>3. We earn the same amount<br><br>88. Don't know                                                                                     |
| 30                                                                         | Decision Making |                                                                                |                                                                                                                                                                      |
| 31<br>32<br>33<br>34                                                       | Intro Note      | Now I would like to talk to you about how you and your partner make decisions. |                                                                                                                                                                      |
| 35<br>36<br>37<br>38<br>39<br>40<br>41<br>42<br>43                         | f11             | Who usually decides how the money you earn will be used?                       | 1. Yourself (Respondent)<br>2. Jointly (This partner and you together)<br>3. Mainly this partner<br>4. Someone else<br>5. Do not earn money<br><br>88. Refuse to say |
| 44<br>45<br>46<br>47                                                       | f11b            | (if above question=4 ) Who decides?                                            | _____                                                                                                                                                                |
| 48<br>49<br>50<br>51<br>52<br>53<br>54<br>55<br>56<br>57<br>58<br>59<br>60 | f12             | Who usually decides how your partner's earnings will be used?                  | 1. Yourself (Respondent)<br>2. Jointly (This partner and you together)<br>3. Mainly this partner<br>4. Someone else<br>5. Do not earn money<br><br>88. Refuse to say |

|      |                                                                                 |                                                                                                                                                                                                                                                                    |
|------|---------------------------------------------------------------------------------|--------------------------------------------------------------------------------------------------------------------------------------------------------------------------------------------------------------------------------------------------------------------|
| f12b | (if above question=4 ) Who decides?                                             | _____                                                                                                                                                                                                                                                              |
| f13  | Who usually makes decisions about health care for yourself?                     | <ol style="list-style-type: none"> <li>1. Yourself (Respondent)</li> <li>2. Jointly (This partner and you together)</li> <li>3. Mainly this partner</li> <li>4. Someone else</li> <li>5. Not applicable/ Don't have children</li> <li>88. Refuse to say</li> </ol> |
| f13b | (if above question=4 ) Who decides?                                             | _____                                                                                                                                                                                                                                                              |
| f14  | Who usually makes decisions about health care for your child with this partner? | <ol style="list-style-type: none"> <li>1. Yourself (Respondent)</li> <li>2. Jointly (This partner and you together)</li> <li>3. Mainly this partner</li> <li>4. Someone else</li> <li>5. Not applicable/ Don't have children</li> <li>88. Refuse to say</li> </ol> |
| f14b | (if above question=4 ) Who decides?                                             | _____                                                                                                                                                                                                                                                              |
| f15  | Who usually makes decisions about health care for your partner?                 | <ol style="list-style-type: none"> <li>1. Yourself (Respondent)</li> <li>2. Jointly (This partner and you together)</li> <li>3. Mainly this partner</li> <li>4. Someone else</li> <li>5. Not applicable/ Don't have children</li> <li>88. Refuse to say</li> </ol> |
| f15b | (if above question=4 ) Who decides?                                             | _____                                                                                                                                                                                                                                                              |
| f16  | Who usually makes decisions about making major household purchases?             | <ol style="list-style-type: none"> <li>1. Yourself (Respondent)</li> <li>2. Jointly (This partner and you together)</li> <li>3. Mainly this partner</li> <li>4. Someone else</li> </ol>                                                                            |

|          |                                                                                                                                                                                                                                                                                                                                                                                                                                                                                                                                                                                                                                                                   |                                                             |
|----------|-------------------------------------------------------------------------------------------------------------------------------------------------------------------------------------------------------------------------------------------------------------------------------------------------------------------------------------------------------------------------------------------------------------------------------------------------------------------------------------------------------------------------------------------------------------------------------------------------------------------------------------------------------------------|-------------------------------------------------------------|
|          |                                                                                                                                                                                                                                                                                                                                                                                                                                                                                                                                                                                                                                                                   | 5. Not applicable/ Don't have children<br>88. Refuse to say |
| f16b     | (if above question=4 ) Who decides?                                                                                                                                                                                                                                                                                                                                                                                                                                                                                                                                                                                                                               |                                                             |
| Note     | I would like to ask you questions about [probability/chance/likelihood] that certain things will happen. There are ten beans in this cup. I will ask you to pick some of the beans and put them in the plate. The number of beans that you are going to put in the plate will reflect the probability that something will happen. One bean means there is very little chance that something will happen. If you do not put any bean in the plate it means you are certain that there is no likelihood that something will happen.                                                                                                                                 |                                                             |
| note2    | If you put additional beans in the plate it means the chance that something will happen will also increase. For example, if you put one or two beans in the plate, it means there is little chance that something will happen. Even though there is little chance but it can happen. If you put ten beans it means there is equal chance of something happening or not. If you put six beans it means the chance that something will happen is slightly greater than not happening. If you put all ten beans, it means you are certain that whatever the case something will really happen. There is no wrong or right answer I just want to know what you think. |                                                             |
| note3    | INTERVIEWER: Report for each question the NUMBER OF BEANS put in the PLATE. After each question, replace the beans on the table (unless otherwise noted).                                                                                                                                                                                                                                                                                                                                                                                                                                                                                                         |                                                             |
| Practice |                                                                                                                                                                                                                                                                                                                                                                                                                                                                                                                                                                                                                                                                   |                                                             |
| pr1      | Pick the number of beans that reflects how likely you think it is that:                                                                                                                                                                                                                                                                                                                                                                                                                                                                                                                                                                                           | _____                                                       |



|                                           |                                                                                                                                                                                                                                                                                                                                                                                                                        |                 |
|-------------------------------------------|------------------------------------------------------------------------------------------------------------------------------------------------------------------------------------------------------------------------------------------------------------------------------------------------------------------------------------------------------------------------------------------------------------------------|-----------------|
| pr1b                                      | You will go to the market at least once within the next 2 days.                                                                                                                                                                                                                                                                                                                                                        | _____           |
| pr1c                                      | You will go to the market at least once within the next 2 weeks.                                                                                                                                                                                                                                                                                                                                                       | _____           |
| <b>Practice</b>                           |                                                                                                                                                                                                                                                                                                                                                                                                                        |                 |
| pr2                                       | INTERVIEWER: Did Respondent add any beans between pr1b and pr1c?                                                                                                                                                                                                                                                                                                                                                       | 2. Yes<br>0. No |
| pr3                                       | Remember, as time goes by, you may find more time to go to the market. Therefore, you should have added beans to the plate. Let me ask you again. Now, add beans in the plate so that the number of beans in the plate reflects how likely you think it is that you will go to the market at least once within 2 weeks.<br><br>How likely you think it is that you will go to the market at least once within 2 weeks? | _____           |
| f17                                       | Pick the number of beans that reflects how likely you think:                                                                                                                                                                                                                                                                                                                                                           |                 |
| f17a                                      | You will still be married/with [partner one year from now.                                                                                                                                                                                                                                                                                                                                                             | _____           |
| f17b                                      | Your partner will become sick during the next 12 months                                                                                                                                                                                                                                                                                                                                                                | _____           |
| f17c                                      | Your partner will start ART treatment in the next 3 months                                                                                                                                                                                                                                                                                                                                                             | _____           |
| f17d                                      | Your partner will disclose your HIV status to your close friends/family in the next 3 months                                                                                                                                                                                                                                                                                                                           | _____           |
| <b>SELF REPORTED HEALTH AND HAPPINESS</b> |                                                                                                                                                                                                                                                                                                                                                                                                                        |                 |
| Intro Note                                | Now I'd like to talk to you about how healthy and happy you feel.                                                                                                                                                                                                                                                                                                                                                      |                 |

|                                   |                                                                                                                                             |                                                                                                                                                                                      |
|-----------------------------------|---------------------------------------------------------------------------------------------------------------------------------------------|--------------------------------------------------------------------------------------------------------------------------------------------------------------------------------------|
| e1                                | I am interested in your general level of well-being or satisfaction with life. How satisfied are you with your life, all things considered? | <ol style="list-style-type: none"> <li>1. Very satisfied</li> <li>2. Somewhat satisfied</li> <li>3. Neutral</li> <li>4. Somewhat unsatisfied</li> <li>5. Very unsatisfied</li> </ol> |
| e2                                | Do you think that you are more, equally or less satisfied than other persons your age and sex living in your village?                       | <ol style="list-style-type: none"> <li>1. More satisfied</li> <li>2. Equally satisfied</li> <li>3. Less satisfied</li> </ol>                                                         |
| e3                                | In general, would you say your health now is: very good, good, poor or very poor?                                                           | <ol style="list-style-type: none"> <li>1. Very good</li> <li>2. Good</li> <li>3. Poor</li> <li>4. Very poor</li> </ol>                                                               |
| e4                                | How would you compare your health to other people of the same age and sex in your village?                                                  | <ol style="list-style-type: none"> <li>1. More healthy</li> <li>2. Equally healthy</li> <li>3. Less healthy</li> </ol>                                                               |
| e5                                | In the past month, how many days were you too sick to work/go to school/complete household chores?                                          | _____                                                                                                                                                                                |
| <b>Happiness</b>                  |                                                                                                                                             |                                                                                                                                                                                      |
| e6                                | How true are the following statements for you in the last month?                                                                            |                                                                                                                                                                                      |
| e6_1                              | I have felt depressed                                                                                                                       | <ol style="list-style-type: none"> <li>1. Strongly Agree</li> <li>2. Agree</li> <li>3. Disagree</li> <li>4. Strongly Disagree</li> </ol>                                             |
| e6_2                              | I have felt life was not worth living                                                                                                       | <ol style="list-style-type: none"> <li>1. Strongly Agree</li> <li>2. Agree</li> <li>3. Disagree</li> <li>4. Strongly Disagree</li> </ol>                                             |
| e6_3                              | I have felt content.                                                                                                                        | <ol style="list-style-type: none"> <li>1. Strongly Agree</li> <li>2. Agree</li> <li>3. Disagree</li> <li>4. Strongly Disagree</li> </ol>                                             |
| e6_4                              | I have felt lonely                                                                                                                          | <ol style="list-style-type: none"> <li>1. Strongly Agree</li> <li>2. Agree</li> <li>3. Disagree</li> <li>4. Strongly Disagree</li> </ol>                                             |
| <b>GENDER EQUITABLE MEN SCALE</b> |                                                                                                                                             |                                                                                                                                                                                      |

|      |                                                                                                            |                                                                                                                                                                                      |
|------|------------------------------------------------------------------------------------------------------------|--------------------------------------------------------------------------------------------------------------------------------------------------------------------------------------|
| Note | Please tell me if you strongly agree, agree, disagree, or strongly disagree with the following statements: |                                                                                                                                                                                      |
| j1   | Woman's most important role is to take care of her home and cook (take care of home is about housekeeping) | <ol style="list-style-type: none"> <li>1. Strongly Agree</li> <li>2. Agree</li> <li>3. Unsure</li> <li>4. Disagree</li> <li>5. Strongly Disagree</li> </ol> <p>88. Refuse to say</p> |
| j2   | Men need sex more than women                                                                               | <ol style="list-style-type: none"> <li>1. Strongly Agree</li> <li>2. Agree</li> <li>3. Unsure</li> <li>4. Disagree</li> <li>5. Strongly Disagree</li> </ol> <p>88. Refuse to say</p> |
| j3   | Men don't talk about sex, they just do it.                                                                 | <ol style="list-style-type: none"> <li>1. Strongly Agree</li> <li>2. Agree</li> <li>3. Unsure</li> <li>4. Disagree</li> <li>5. Strongly Disagree</li> </ol> <p>88. Refuse to say</p> |
| j4   | There are times when a woman deserves to be beaten                                                         | <ol style="list-style-type: none"> <li>1. Strongly Agree</li> <li>2. Agree</li> <li>3. Unsure</li> <li>4. Disagree</li> <li>5. Strongly Disagree</li> </ol> <p>88. Refuse to say</p> |
| j5   | Changing diapers, giving kids a bath & feeding kids are mother's responsibility                            | <ol style="list-style-type: none"> <li>1. Strongly Agree</li> <li>2. Agree</li> <li>3. Unsure</li> <li>4. Disagree</li> <li>5. Strongly Disagree</li> </ol> <p>88. Refuse to say</p> |
| j6   | It is a woman's responsibility to avoid getting pregnant                                                   | <ol style="list-style-type: none"> <li>1. Strongly Agree</li> <li>2. Agree</li> <li>3. Unsure</li> <li>4. Disagree</li> <li>5. Strongly Disagree</li> </ol> <p>88. Refuse to say</p> |

|      |                                                                            |                                                                                                                                                                                      |
|------|----------------------------------------------------------------------------|--------------------------------------------------------------------------------------------------------------------------------------------------------------------------------------|
| j7   | A man should have the final word about decisions in his home               | <ol style="list-style-type: none"> <li>1. Strongly Agree</li> <li>2. Agree</li> <li>3. Unsure</li> <li>4. Disagree</li> <li>5. Strongly Disagree</li> </ol> <p>88. Refuse to say</p> |
| j8   | Men are always ready to have sex                                           | <ol style="list-style-type: none"> <li>1. Strongly Agree</li> <li>2. Agree</li> <li>3. Unsure</li> <li>4. Disagree</li> <li>5. Strongly Disagree</li> </ol> <p>88. Refuse to say</p> |
| j9   | A woman should tolerate violence in order to keep her family together      | <ol style="list-style-type: none"> <li>1. Strongly Agree</li> <li>2. Agree</li> <li>3. Unsure</li> <li>4. Disagree</li> <li>5. Strongly Disagree</li> </ol> <p>88. Refuse to say</p> |
| j10a | I would be outraged if my wife asked me to use a condom.                   | <ol style="list-style-type: none"> <li>1. Strongly Agree</li> <li>2. Agree</li> <li>3. Unsure</li> <li>4. Disagree</li> <li>5. Strongly Disagree</li> </ol> <p>88. Refuse to say</p> |
| j10b | Men would be outraged if their wife asked them to use a condom             | <ol style="list-style-type: none"> <li>1. Strongly Agree</li> <li>2. Agree</li> <li>3. Unsure</li> <li>4. Disagree</li> <li>5. Strongly Disagree</li> </ol> <p>88. Refuse to say</p> |
| j11  | A man and a woman should decide together what type of contraceptive to use | <ol style="list-style-type: none"> <li>1. Strongly Agree</li> <li>2. Agree</li> <li>3. Unsure</li> <li>4. Disagree</li> <li>5. Strongly Disagree</li> </ol> <p>88. Refuse to say</p> |
| j12  | I would never have a homosexual friend                                     | <ol style="list-style-type: none"> <li>1. Strongly Agree</li> <li>2. Agree</li> <li>3. Unsure</li> <li>4. Disagree</li> </ol>                                                        |

|      |                                                                                       |                                                                                                        |
|------|---------------------------------------------------------------------------------------|--------------------------------------------------------------------------------------------------------|
|      |                                                                                       | 5. Strongly Disagree<br>88. Refuse to say                                                              |
| j13a | If someone insults me, I will defend my reputation, with force if I have to.          | 1. Strongly Agree<br>2. Agree<br>3. Unsure<br>4. Disagree<br>5. Strongly Disagree<br>88. Refuse to say |
| j13b | If someone insults a man, he should defend his reputation, with force if he has to    | 1. Strongly Agree<br>2. Agree<br>3. Unsure<br>4. Disagree<br>5. Strongly Disagree<br>88. Refuse to say |
| j14  | To be a man you need to be tough.                                                     | 1. Strongly Agree<br>2. Agree<br>3. Unsure<br>4. Disagree<br>5. Strongly Disagree<br>88. Refuse to say |
| j15  | Men should be embarrassed if unable to get an erection                                | 1. Strongly Agree<br>2. Agree<br>3. Unsure<br>4. Disagree<br>5. Strongly Disagree<br>88. Refuse to say |
| j16  | If a guy gets a woman pregnant, child is the responsibility of both the man and woman | 1. Strongly Agree<br>2. Agree<br>3. Unsure<br>4. Disagree<br>5. Strongly Disagree<br>88. Refuse to say |
| j17  | A man should know what his partner likes during sex                                   | 1. Strongly Agree<br>2. Agree<br>3. Unsure<br>4. Disagree<br>5. Strongly Disagree<br>88. Refuse to say |

|                    |                                                                                                                         |                                                                                                                                                                                      |
|--------------------|-------------------------------------------------------------------------------------------------------------------------|--------------------------------------------------------------------------------------------------------------------------------------------------------------------------------------|
| j18                | The participation of the father is important in raising children                                                        | <ol style="list-style-type: none"> <li>1. Strongly Agree</li> <li>2. Agree</li> <li>3. Unsure</li> <li>4. Disagree</li> <li>5. Strongly Disagree</li> </ol> <p>88. Refuse to say</p> |
| j19                | It's important for men to have friends to talk about their problems                                                     | <ol style="list-style-type: none"> <li>1. Strongly Agree</li> <li>2. Agree</li> <li>3. Unsure</li> <li>4. Disagree</li> <li>5. Strongly Disagree</li> </ol> <p>88. Refuse to say</p> |
| j20                | A couple should decide together if they want to have children.                                                          | <ol style="list-style-type: none"> <li>1. Strongly Agree</li> <li>2. Agree</li> <li>3. Unsure</li> <li>4. Disagree</li> <li>5. Strongly Disagree</li> </ol> <p>88. Refuse to say</p> |
| Comment            | We have reached the end of the chat. Thank you for your time. Do you have anything else you would like to say?          |                                                                                                                                                                                      |
| End Note           | Thank the participant for their time and give them transport reimbursement, if they did not come for an ART appointment |                                                                                                                                                                                      |
| Comments           | Enumerator comments                                                                                                     |                                                                                                                                                                                      |
| End of the survey! |                                                                                                                         |                                                                                                                                                                                      |

**BASELINE SURVEY**  
**Identifying efficient linkages strategies for HIVST (IDEaL)**  
 Female (Chichewa)

| Question Name                  | Label                                                                                                                                                                                                 | Responses                                                                                                                                                                                                                                               |
|--------------------------------|-------------------------------------------------------------------------------------------------------------------------------------------------------------------------------------------------------|---------------------------------------------------------------------------------------------------------------------------------------------------------------------------------------------------------------------------------------------------------|
| <b>INTRODUCTION SECTION</b>    |                                                                                                                                                                                                       |                                                                                                                                                                                                                                                         |
| interviewer                    | Full Name of Interviewer                                                                                                                                                                              |                                                                                                                                                                                                                                                         |
| Interview date                 | Interview date                                                                                                                                                                                        |                                                                                                                                                                                                                                                         |
| Time start                     | Time survey started                                                                                                                                                                                   |                                                                                                                                                                                                                                                         |
| District                       | District                                                                                                                                                                                              |                                                                                                                                                                                                                                                         |
| Facility                       | Facility                                                                                                                                                                                              |                                                                                                                                                                                                                                                         |
| ID                             | ID                                                                                                                                                                                                    |                                                                                                                                                                                                                                                         |
| <b>SECTION A: DEMOGRAPHICS</b> |                                                                                                                                                                                                       |                                                                                                                                                                                                                                                         |
| Intro Note                     | Zikomo povomera kutenga nawo mbali. Pa nthawi ino ndikufunsani ma funso ochepa okhudza za inu komanso kuti ndinu ndani. Chonde khalani omasuka kuyankha moona. Palibe yankho lokhoza komanso lolakwa. |                                                                                                                                                                                                                                                         |
| a7                             | Ndinu mtundu wanji wa munthu?                                                                                                                                                                         | <ol style="list-style-type: none"> <li>1. Lomwe</li> <li>2. Sena</li> <li>3. Chewa</li> <li>4. Mang'anja/Nyanja</li> <li>5. Ngoni</li> <li>6. Tumbuka</li> <li>7. Tonga</li> <li>8. Yao</li> </ol> <p style="text-align: right;">99. Other, specify</p> |

|      |                                                                                                                             |                                                                                                                                |
|------|-----------------------------------------------------------------------------------------------------------------------------|--------------------------------------------------------------------------------------------------------------------------------|
| a3   | Kodi maphunziro anu mudapita nawo patali bwanji?                                                                            | 1. Pulayimale<br>2. Sekondale<br>3. Koleji                                                                                     |
| a3b  | Ndi kalasi liti munamaliza ya maphunziro anu apamwamba?                                                                     | _____                                                                                                                          |
| a4   | Chonde ganizani za masabata khumi ndi awiri apitawa, mungafotokoze bwanji za ntchito yomwe mumagwira?                       | 1. Ntchito yokhazikika<br>2. Ganyu/bisinesi<br>3. Sindikugwira ntchito                                                         |
| a5   | Kodi pakadali pano muli pa banja?                                                                                           | 1. Pa banja<br>2. Kukhala limodzi ngati banja<br>3. Chibwezi Chokhazikika<br>4. Tinasiyana<br>5. Banja linatha<br><br>99. Zina |
| a6   | Muli ndi ana angati amoyo?                                                                                                  | _____                                                                                                                          |
| a6b  | Mwana wanu wang'ono ali ndi zaka zingati?                                                                                   | _____                                                                                                                          |
| a6bc | Mwana wanu wang'ono ali ndi zaka zingati?                                                                                   | _____                                                                                                                          |
| a4b  | Pakadali pano ana omwe mumakhala nawo ndi angati?                                                                           | _____                                                                                                                          |
| a7   | Pa miyezi khumi ndi iwiri yapitayi mwakhala ndi abwenzi ogonana nawo angati?                                                | _____                                                                                                                          |
| a8   | Mwakhlapo ndi bwenzi logonana kupatula akazi anu? amuna anu osagwiritsa ntchito kondomu mu miyezi khumi ndi awiri yapitayi? | 3. Eya<br>4. Ayi<br>88. Sindikudziwa<br>89. Akana kuyankha                                                                     |
| a8b  | Mwagonanapo ndi munthu osagwiritsa ntchito kondomu mu miyezi khumi ndi awiri yapitayi?                                      | 3. Eya<br>4. Ayi<br>88. Sindikudziwa<br>89. Akana kuyankha                                                                     |



| SECTION B: INCOME QUESTIONS |                                                                                                                                                                                                         |                                                                                                                                      |
|-----------------------------|---------------------------------------------------------------------------------------------------------------------------------------------------------------------------------------------------------|--------------------------------------------------------------------------------------------------------------------------------------|
| Intro Note                  | Pa nthawi ino ndikufunsani za zipangizo zomwe inu komanso apabanja panu alinazo. Mkati mwakucheza kwathu ndikufunsaninso za ndalama zomwe mulinazo komanso komanso zomwe mumachita kuti mupeze ndalama. |                                                                                                                                      |
| b1                          | Chonde ganizirani za miyezi Khumi ndi iwiri yapitayi, mungafotokoze bwanji za ntchito yomwe mumagwira?                                                                                                  | <ol style="list-style-type: none"> <li>1. Ntchito yokhazikika</li> <li>2. Ganyu/bisinesi</li> <li>3. Sindikugwira ntchito</li> </ol> |
| b1b                         | Ganizani za ntchito zonse mwagwira mwezi watha. Mwagwira masiku angati olipidwa?                                                                                                                        | _____                                                                                                                                |
| b2                          | Muli ndi ndalama zilizonse zomwe mukusungira za mtsogolo monga, ku banki, gulu losugira ndalama kapena ndalama zosunga kunyumba?                                                                        | <ol style="list-style-type: none"> <li>2. Eya</li> <li>3. Ayi</li> </ol>                                                             |
| Household Assets            |                                                                                                                                                                                                         |                                                                                                                                      |
| b3                          | Does your household have:<br><i>The respondent said that his/her household doesn't have any of the household assets. Please probe and ensure that this is correct before you proceed.</i>               |                                                                                                                                      |
| b3_1                        | Denga la malata?                                                                                                                                                                                        | <ol style="list-style-type: none"> <li>1. Eya</li> <li>2. Ayi</li> </ol>                                                             |
| b3_2                        | Magetsi ?                                                                                                                                                                                               | <ol style="list-style-type: none"> <li>3. Eya</li> <li>4. Ayi</li> </ol>                                                             |
| b3_3                        | Koloboyi?                                                                                                                                                                                               | <ol style="list-style-type: none"> <li>3. Eya</li> <li>4. Ayi</li> </ol>                                                             |
| b3_4                        | Nyali?                                                                                                                                                                                                  | <ol style="list-style-type: none"> <li>3. Eya</li> <li>4. Ayi</li> </ol>                                                             |
| b3_5                        | Wailesi?                                                                                                                                                                                                | <ol style="list-style-type: none"> <li>3. Eya</li> <li>4. Ayi</li> </ol>                                                             |
| b3_6                        | Kanema?                                                                                                                                                                                                 | <ol style="list-style-type: none"> <li>3. Eya</li> <li>4. Ayi</li> </ol>                                                             |
| b3_7                        | Lamya ya M'manja?                                                                                                                                                                                       | <ol style="list-style-type: none"> <li>3. Eya</li> <li>4. Ayi</li> </ol>                                                             |
| b3_8                        | Kama?                                                                                                                                                                                                   | <ol style="list-style-type: none"> <li>3. Eya</li> </ol>                                                                             |

|              |                                                                                |                              |
|--------------|--------------------------------------------------------------------------------|------------------------------|
|              |                                                                                | 4. Ayi                       |
| b3_9         | Sofa?                                                                          | 3. Eya<br>4. Ayi             |
| b3_10        | Tebulo?                                                                        | 3. Eya<br>4. Ayi             |
| b3_11        | Filiji?                                                                        | 3. Eya<br>4. Ayi             |
| b3_12        | Matilesi?                                                                      | 3. Eya<br>4. Ayi             |
| b3_13        | Mipando                                                                        | 3. Eya<br>4. Ayi             |
| b3_14        | Ng'ombe?                                                                       | 3. Eya<br>4. Ayi             |
| b3_15        | Mbuzi?                                                                         | 3. Eya<br>4. Ayi             |
| b3_16        | Nkhosa?                                                                        | 3. Eya<br>4. Ayi             |
| b3_17        | Nkhumba?                                                                       | 3. Eya<br>4. Ayi             |
| b3_18        | Bulu?                                                                          | 3. Eya<br>4. Ayi             |
| b3_19        | Nkhuku?                                                                        | 3. Eya<br>4. Ayi             |
| b3_20        | Zoweta zina                                                                    | 3. Eya<br>4. Ayi             |
| b4           | Mu masiku makumi atatu apitawa mwamako mowa?                                   | 3. Eya<br>4. Ayi             |
| b4b          | Pa masiku makumi atatu apitawa mwamwa mowa masiku angati?                      | _____                        |
| b4c          | Mwataya ndalama zingati masiku omaliza omwe munapita ku mowa?                  | MWK:                         |
| b4d          | Zonse pamodzi, mwataya ndalama zingati pa mowa mu masiku makumi atatu apitawa? | MWK:                         |
| Relationship |                                                                                |                              |
| Intro Note   | Panthawi ino ndikufunsani za abwezi ogonana nawo?                              |                              |
| f8           | Mwakhala pa ubwenzi ogonana ndi bwenzi lanu kwa nthawi yayitali bwanji?        | Masiku _____<br>Miyezi _____ |

|                 |                                                                                                     |                                                                                                                                                                       |
|-----------------|-----------------------------------------------------------------------------------------------------|-----------------------------------------------------------------------------------------------------------------------------------------------------------------------|
|                 |                                                                                                     | Zaka _____                                                                                                                                                            |
| f9              | Muli ndi ana ndi bwenzi lanu logonana nalo? Ana angati?                                             | _____                                                                                                                                                                 |
| f10             | Mumayankhulana mowirikiza bwanji ndi bwenzi lanu pakadali pano?                                     | 8. Tsiku ndi tsiku<br>9. Masiku angapo pasabata<br>10. Kamodzi pa sabata<br>11. Kangapo pa mwezi<br>12. Kamodzi pa mwezi<br>13. Kosakwana mwezi<br>14. Sitiyankhulani |
| f10b            | Pa mwezi amalandila ndalama zambiri ndi ndani? Inu kapena bwenzi lanu?                              | 5. Ine<br>6. Bwenzi langa<br>7. Timalandira ndalama zofanana<br>8. Sindikudziwa                                                                                       |
| Decision Making |                                                                                                     |                                                                                                                                                                       |
| Intro Note      | Pa nthawi ino ndikufunsani za momwe mumapangira maganizo ndi bwenzi lanu                            |                                                                                                                                                                       |
| f11             | Nthawi zambiri ndi ndani amene amapanga chiganizo cha momwe ndalama mumapeze zigwiritsidwe ntchito? | 6. Ine<br>7. Timagwirizana<br>8. Nthawi zambiri bwenzi langa<br>9. Munthu wina<br>10. Sindipeza ndalama<br>89. Sindikufuna kuyankha                                   |
| f11b            | (Ngati yankho ndi 4) Amapanga chiganizo ndi ndani?                                                  | _____                                                                                                                                                                 |
| f12             | Amapanga chiganizo cha momwe ndalama za bwenzi lanu zigwiritsidwe ntchito ndi ndani?                | 6. Ine<br>7. Timagwirizana<br>8. Nthawi zambiri bwenzi langa<br>9. Munthu wina<br>10. Sindipeza ndalama<br>89. Sindikufuna kuyankha                                   |
| f12b            | (Ngati yankho ndi 4)                                                                                | _____                                                                                                                                                                 |

|      |                                                                                                               |                                                                                                                                     |
|------|---------------------------------------------------------------------------------------------------------------|-------------------------------------------------------------------------------------------------------------------------------------|
| f13  | Nthawi zambiri amapanga chiganizo chokhudza thandizo la zaumoyo wanu ndi ndani?                               | 6. Ine<br>7. Timagwirizana<br>8. Nthawi zambiri bwenzi langa<br>9. Munthu wina<br>10. Sindipeza ndalama<br>89. Sindikufuna kuyankha |
| f13b | (Ngati yankho ndi 4) Amapanga chiganizo ndi ndani?                                                            | _____                                                                                                                               |
| f14  | Nthawi zambiri amapanga chiganizo cha thandizo la zaumoyo la mwana yemwe muli naye ndi bwenzi lanu ndi ndani? | 6. Ine<br>7. Mogwirizana<br>8. Nthawi zambiri bwenzi langa<br>9. Munthu wina<br>10. Ndilibe mwana<br><br>88. Sindikufuna kuyankha   |
| f14b | (if above question=4 ) Who decides?                                                                           | _____                                                                                                                               |
| f15  | Nthawi zambiri amapanga chiganizo chokhudza thandizo la zaumoyo la bwenzi lanu ndi ndani?                     | 1. Ine<br>2. Mogwirizana<br>3. Nthawi zambiri bwenzi langa<br>4. Munthu wina<br>5. Ndilibe ana<br>88.Sindikufuna kuyankha           |
| f15b | (Ngati yankho ndi 4) Amapanga chiganizo ndi ndani?                                                            | _____                                                                                                                               |
| f16  | Kodi ndi ndani amene amapanga ziganizo zogula katundu mkulumkulu wapa khomo panu?                             | 1. Ine<br>2. Mogwirizana<br>3. Nthawi zambiri bwenzi langa<br>4. Munthu wina<br>5. Ndilibe ana<br>88.Sindikufuna kuyankha           |
| f16b | (Ngati yankho ndi 4) Amapanga                                                                                 |                                                                                                                                     |

|          |                                                                                                                                                                                                                                                                                                                                                                                                                                                                                                                                                                                                                                                                                                                  |  |
|----------|------------------------------------------------------------------------------------------------------------------------------------------------------------------------------------------------------------------------------------------------------------------------------------------------------------------------------------------------------------------------------------------------------------------------------------------------------------------------------------------------------------------------------------------------------------------------------------------------------------------------------------------------------------------------------------------------------------------|--|
|          | chiganizo ndani?                                                                                                                                                                                                                                                                                                                                                                                                                                                                                                                                                                                                                                                                                                 |  |
| Note     | Ndikufuna ndikufunsi zokhudzana za (Kuthekela/mwayi) kuti zinthu zina zichitike. Muli nyemba mu kapu. Ndikufunsi kuti musankhe zina mwa nyemba ndipo muyike mu mbale. Mulingo wa nyemba omwe muyike mu mbale udzafanizira kuti chinachake chichitika. Nyemba imodzi ikusonyeza kuti mwayi ndiochepa kuti chinachake chichitika. Ngati simuika nyemba mm'bale ndekuti mukutsimikiza kuti palibe mwayi oti chinachake chichitika                                                                                                                                                                                                                                                                                   |  |
| note2    | Ngati muyike nyemba zowonjezera mu mbale, zikutanthauza kuti mwayi oti chinachake chichitika uchuluka, mwachitsanzo ngati muyika nyemba imodzi kapena ziwiri mwayi oti chinachake chichitika. Ngakhale pali mwayi ochepa koma chinachake chichitika. Ngati muyike nyemba nkhumu zikutanthauza kuti pali mwayi ofanana oti chinachake chichika kapena ayi. Ngati muyike nyemba zisanu ndi imodzi zikutanthauza kuti mwayi woti chinachake chichitika uli ochulukilapo kuposa mwayi oti chinachake sichichitika. Ngati muyike nyemba zonse khumi ndekuti muli ndi chikhulupiliro chonse kuti chinachake chichitikadi pavute pasavute. Palibe yankho lokhonza kapena lolakwa ndikungofuna kudziwa zomwe mukuganiza. |  |
| note3    | Ofunsa: Pelekani yankho lanu pa funso lililonse nambala ya nyemba zomwe lili m'bale. Pakutha pa funso lililonse, bwezeletsani nyemba pa tebulo.                                                                                                                                                                                                                                                                                                                                                                                                                                                                                                                                                                  |  |
| Practice |                                                                                                                                                                                                                                                                                                                                                                                                                                                                                                                                                                                                                                                                                                                  |  |

|          |                                                                                                                                                                                                                                           |                  |
|----------|-------------------------------------------------------------------------------------------------------------------------------------------------------------------------------------------------------------------------------------------|------------------|
| pr1      | Sankhani mulingo wa nyemba omwe ukhale ndi kuthekela kumene mukuganiza kuti:                                                                                                                                                              | _____            |
| pr1b     | Mupita ku msika mosachepera kamodzi m' masiku awiri akudzawa                                                                                                                                                                              | _____            |
| pr1c     | Mupita ku msika mosachepera kamodzi m' masabata awiri akudzawa.                                                                                                                                                                           | _____            |
| Practice |                                                                                                                                                                                                                                           |                  |
| pr2      | Ofunsa: kodi oyankha anawonjezera nyamba pakati pa pr1b ndi pr1c                                                                                                                                                                          | 3. Eya<br>1. Ayi |
| pr3      | Kumbukurani kuti pamene nthawi ikupita muzipeza mpata wambiri opita kumsika. Choncho, munayenela kuti mwaika nyemba zambiri m' bale<br><br>Kodi mukuganiza kuti kumsika mupita mosachepela kamodzi bwanji mu nyengo ya ma sabata awiriwa? | _____            |
| f17      | Sankhani mlingo wa nyemba umene ufanizile kaganidwe kanu:                                                                                                                                                                                 |                  |

|                                           |                                                                                                                                                                 |                                                                                                                                      |
|-------------------------------------------|-----------------------------------------------------------------------------------------------------------------------------------------------------------------|--------------------------------------------------------------------------------------------------------------------------------------|
| f17a                                      | Mudzakhalabe pabanja ndi bwenzi lanu m'chaka chimodzi chikubwerachi                                                                                             | _____                                                                                                                                |
| f17b                                      | Bwenzi lanu lidzapezeka ndi matenda a HIV m'miyezi khumi ndi iwiri ikubwerayi                                                                                   | _____                                                                                                                                |
| f17c                                      | Bwenzi lanu lidzayamba kumwa ma ARV m'miyezi itatu ikubwerayi                                                                                                   | _____                                                                                                                                |
| f17d                                      | Bwenzi lanu lidzaulula kuti inuyo muli ndi kachilombo ka HIV kwa anzanu apamtima/abale anu m'miyezi itatu ikubwerayi                                            | _____                                                                                                                                |
| <b>SELF REPORTED HEALTH AND HAPPINESS</b> |                                                                                                                                                                 |                                                                                                                                      |
| Intro Note                                | Pa nthawi ino ndikufuna ndikambe nanu zokhudza umoyo ndi chisangalalo chanu.                                                                                    |                                                                                                                                      |
| e1                                        | Ndili ndi chidwi ndi mukudziwa za umoyo ndi kukhutitsidwa kwanu. Kodi muli okhutitsidwa bwanji ndi moyo wanu, pakutengela zonse.                                | 6. Okhutitsidwa kwamburi<br>7. Okhutitsidwa pang'ono<br>8. Pakatikati<br>9. Okhutitsidwa pang'ono<br>10. Osakhutitsidwa olo pang'ono |
| e2                                        | Kodi mukuona ngati muli okhutitsidwa mofanana kapena osakhutitsidwa pang'ono mosaposele anthu ena a muna kapena akazi a msinkhu wanu ndi opezeka m'mudzi mwanu? | 4. Okhutitsidwa kwambiri<br>5. Okhutitsidwa<br>6. Okhutitsidwa pang'ono                                                              |
| e3                                        | Kutengela zonse, Kodi munganene kuti umoyo wanu tsopano uli bwino kwambiri, ulibwino, sulibwino, suli bwino olo pang'ono                                        | 5. Bwino kwambiri<br>6. Bwino<br>7. Silibwino<br>8. Silibwino olo pang'ono                                                           |
| e4                                        | Kodi mungazifananizile bwanji za thanzi lanu ndi la anthu ena a msikhu ofanana ndi wanu, amuna kapena                                                           | 4. A thanzi kwambiri<br>5. A thanzi<br>6. Nthanzi lochepekela                                                                        |

|                            |                                                                                                                                                  |                                                                                                                            |
|----------------------------|--------------------------------------------------------------------------------------------------------------------------------------------------|----------------------------------------------------------------------------------------------------------------------------|
|                            | akazi a m'mudzi mwanu.                                                                                                                           |                                                                                                                            |
| e5                         | Kodi mwezi wathawu, ndi masiku angati omwe munadwara kwambiri ofika kukulepheretsani kugwira nthito/kupita ku sukulu/kugwira ntchito za pa khomo | _____                                                                                                                      |
| Happiness                  |                                                                                                                                                  |                                                                                                                            |
| e6                         | Kodi ziganizo izi ndi zowona bwanji kwa inu?                                                                                                     |                                                                                                                            |
| e6_1                       | Ndinali ndi nkhwawa                                                                                                                              | 5. Ndikugwirizana nazo kwambiri<br>6. Ndikugwirizana nazo<br>7. Sindikugwirizana nazo<br>8. Sindikugwirizana nazo kwambiri |
| e6_2                       | Ndimanva ngati moyo wafika                                                                                                                       | 5. Ndikugwirizana nazo kwambiri<br>6. Ndikugwirizana nazo<br>7. Sindikugwirizana nazo<br>8. Sindikugwirizana nazo kwambiri |
| e6_3                       | Ndimanva kukhutitsidwa                                                                                                                           | 5. Ndikugwirizana nazo kwambiri<br>6. Ndikugwirizana nazo<br>7. Sindikugwirizana nazo<br>8. Sindikugwirizana nazo kwambiri |
| e6_4                       | Ndimanva kusalidwa                                                                                                                               | 5. Ndikugwirizana nazo kwambiri<br>6. Ndikugwirizana nazo<br>7. Sindikugwirizana nazo<br>8. Sindikugwirizana nazo kwambiri |
| GENDER EQUITABLE MEN SCALE |                                                                                                                                                  |                                                                                                                            |
| Note                       | Chonde ndiuzeni ngati mukugwirizana nazo kwambiri, mukugwirizana nazo, simukugwirizana nazo, simukugwirizana nazo olo pang'ono ziganizo izi:     |                                                                                                                            |



|    |                                                                          |                                                                                                                                                                                      |
|----|--------------------------------------------------------------------------|--------------------------------------------------------------------------------------------------------------------------------------------------------------------------------------|
| j1 | Udindo ofunikila wa mzimayi ndi kusamala khomo lake ndi kuphika.         | 6. Ndikugwirizana nazo kwambiri<br>7. Ndikugwirizana nazo<br>8. Sindikukhulupilira<br>9. Sindikugwirizana nazo<br>10. Sindikugwirizana nazo olo pang'ono<br>89. Sindikufuna kuyankha |
| j2 | Abambo amafuna kugonana kuposa amayi                                     | 6. Ndikugwirizana nazo kwambiri<br>7. Ndikugwirizana nazo<br>8. Sindikukhulupilira<br>9. Sindikugwirizana nazo<br>10. Sindikugwirizana nazo olo pang'ono<br>88. Sindikufuna kuyankha |
| j3 | Azibambo sakonda kukambirana za kugonana amangochita                     | 6. Ndikugwirizana nazo kwambiri<br>7. Ndikugwirizana nazo<br>8. Sindikukhulupilira<br>9. Sindikugwirizana nazo<br>10. Sindikugwirizana nazo olo pang'ono<br>88. Sindikufuna kuyankha |
| j4 | Nthawi zina mzimayi amayenela kumenyedwa.                                | 6. Ndikugwirizana nazo kwambiri<br>7. Ndikugwirizana nazo<br>8. Sindikukhulupilira<br>9. Sindikugwirizana nazo<br>10. Sindikugwirizana nazo olo pang'ono<br>88. Sindikufuna kuyankha |
| j5 | Kusinta matewela, kusambitsa mwana, kudyetsa mwana ndi udindo wa mzimayi | 6. Ndikugwirizana nazo kwambiri<br>7. Ndikugwirizana nazo<br>8. Sindikukhulupilira<br>9. Sindikugwirizana nazo<br>10. Sindikugwirizana nazo olo pang'ono<br>88. Sindikufuna kuyankha |
| j6 | Ndi udindi wa mzimayi kupewa                                             | 6. Ndikugwirizana nazo kwambiri                                                                                                                                                      |

|      |                                                                             |                                                                                                                                                                                          |
|------|-----------------------------------------------------------------------------|------------------------------------------------------------------------------------------------------------------------------------------------------------------------------------------|
|      | kutenga mimba.                                                              | 7. Ndikugwirizana nazo<br>8. Sindikukhulupilira<br>9. Sindikugwirizana nazo<br>10. Sindikugwirizana nazo olo pang'ono<br><br>88. Sindikufuna kuyankha                                    |
| j7   | Mzibambo ayenela kukhala ndi chiganizo chomaliza cha mnyumba mwake.         | 6. Ndikugwirizana nazo kwambiri<br>7. Ndikugwirizana nazo<br>8. Sindikukhulupilira<br>9. Sindikugwirizana nazo<br>10. Sindikugwirizana nazo olo pang'ono<br><br>88. Sindikufuna kuyankha |
| j8   | Azibambo amakhala okonzeka ku gonana                                        | 6. Ndikugwirizana nazo kwambiri<br>7. Ndikugwirizana nazo<br>8. Sindikukhulupilira<br>9. Sindikugwirizana nazo<br>10. Sindikugwirizana nazo olo pang'ono<br><br>Sindikufuna kuyankha     |
| j9   | Mzimayi akuyenela kulekelela nkhaza kuti asunge banja lake.                 | 6. Ndikugwirizana nazo kwambiri<br>7. Ndikugwirizana nazo<br>8. Sindikukhulupilira<br>9. Sindikugwirizana nazo<br>10. Sindikugwirizana nazo olo pang'ono<br><br>Sindikufuna kuyankha     |
| j10a | Ndikhoza kukwiya akaza anga atati andiuze kuti ndigwiritse ntchito kondumu. | 6. Ndikugwirizana nazo kwambiri<br>7. Ndikugwirizana nazo<br>8. Sindikukhulupilira<br>9. Sindikugwirizana nazo<br>10. Sindikugwirizana nazo olo pang'ono<br><br>88. Sindikufuna kuyankha |
| j10b | Azibambo akhoza kukwiya akazi awo atawauza kuti agwiritse ntchito           | 6. Ndikugwirizana nazo kwambiri                                                                                                                                                          |

|      |                                                                                               |                                                                                                                                                                                          |
|------|-----------------------------------------------------------------------------------------------|------------------------------------------------------------------------------------------------------------------------------------------------------------------------------------------|
|      | kondomu                                                                                       | 7. Ndikugwirizana nazo<br>8. Sindikukhulupilira<br>9. Sindikugwirizana nazo<br>10. Sindikugwirizana nazo olo pang'ono<br><br>88. Sindikufuna kuyankha                                    |
| j11  | Mzimayi komanso nzibambo agwirizane limodzi kuti agwiritse ntchito njira yanji yakulela       | 6. Ndikugwirizana nazo kwambiri<br>7. Ndikugwirizana nazo<br>8. Sindikukhulupilira<br>9. Sindikugwirizana nazo<br>10. Sindikugwirizana nazo olo pang'ono<br><br>88. Sindikufuna kuyankha |
| j12  | Sindingakhale ndi nzanga wopanga zamathanyula                                                 | 6. Ndikugwirizana nazo kwambiri<br>7. Ndikugwirizana nazo<br>8. Sindikukhulupilira<br>9. Sindikugwirizana nazo<br>10. Sindikugwirizana nazo olo pang'ono<br><br>88. Sindikufuna kuyankha |
| j13a | Ngati munthu angandinyoze, ndiziteteza pogwiritsa ntchito mphanvu, ngati ndikufunika kutero.  | 6. Ndikugwirizana nazo kwambiri<br>7. Ndikugwirizana nazo<br>8. Sindikukhulupilira<br>9. Sindikugwirizana nazo<br>10. Sindikugwirizana nazo olo pang'ono<br><br>88. Sindikufuna kuyankha |
| j13b | Ngati munthu anganyoze mzibambo, aziteteze pogwiritsa ntchito mphanvu ngati akufunika kutelo. | 6. Ndikugwirizana nazo kwambiri<br>7. Ndikugwirizana nazo<br>8. Sindikukhulupilira<br>9. Sindikugwirizana nazo<br>10. Sindikugwirizana nazo olo pang'ono<br><br>Sindikufuna kuyankha     |
| j14  | Kuti ukhale mzibambo ukufunika kukhala ovuta.                                                 | 6. Ndikugwirizana nazo kwambiri<br>7. Ndikugwirizana nazo<br>8. Sindikukhulupilira                                                                                                       |

|     |                                                                                     |                                                                                                                                                                                                     |
|-----|-------------------------------------------------------------------------------------|-----------------------------------------------------------------------------------------------------------------------------------------------------------------------------------------------------|
|     |                                                                                     | <p>9. Sindikugwirizana nazo<br/>10. Sindikugwirizana nazo olo pang'ono<br/>Sindikufuna kuyankha<br/>Sindikugwirizana nazo kwambiri</p> <p>88. Refuse to say<br/>Sindikufuna kuyankha</p>            |
| j15 | Azibambo akuyenela kunva manyazi ngati akukanika kutota                             | <p>6. Ndikugwirizana nazo kwambiri<br/>7. Ndikugwirizana nazo<br/>8. Sindikukhulupilira<br/>9. Sindikugwirizana nazo<br/>10. Sindikugwirizana nazo olo pang'ono</p> <p>88. Sindikufuna kuyankha</p> |
| j16 | Ngati mzibambo wapeleka mimba kwa mzimayi, mwanayo ndi udindo wa anthu onse a wiri. | <p>6. Ndikugwirizana nazo kwambiri<br/>7. Ndikugwirizana nazo<br/>8. Sindikukhulupilira<br/>9. Sindikugwirizana nazo<br/>10. Sindikugwirizana nazo olo pang'ono</p> <p>88. Sindikufuna kuyankha</p> |
| j17 | Nzibambo akuyenela kudziwa zomwe bwenzi lake limakonda pogonana                     | <p>6. Ndikugwirizana nazo kwambiri<br/>7. Ndikugwirizana nazo<br/>8. Sindikukhulupilira<br/>9. Sindikugwirizana nazo<br/>10. Sindikugwirizana nazo olo pang'ono</p> <p>88. Sindikufuna kuyankha</p> |
| j18 | Kutenga nawo mbali kwa a bambo ndi kofunika polela mwana                            | <p>6. Ndikugwirizana nazo kwambiri<br/>7. Ndikugwirizana nazo<br/>8. Sindikukhulupilira<br/>9. Sindikugwirizana nazo<br/>10. Sindikugwirizana nazo olo pang'ono</p> <p>88. Sindikufuna kuyankha</p> |

|                    |                                                                                                                         |                                                                                                                                                                                          |
|--------------------|-------------------------------------------------------------------------------------------------------------------------|------------------------------------------------------------------------------------------------------------------------------------------------------------------------------------------|
| j19                | Ndi zofunika kuti abambo azikhala ndi anzawo okambilana nawo mavuto awo.                                                | 6. Ndikugwirizana nazo kwambiri<br>7. Ndikugwirizana nazo<br>8. Sindikukhulupilira<br>9. Sindikugwirizana nazo<br>10. Sindikugwirizana nazo olo pang'ono<br><br>88. Sindikufuna kuyankha |
| j20                | Banja lizigwirizana limodzi ngati likufuna kukhala ndi mwana                                                            | 6. Ndikugwirizana nazo kwambiri<br>7. Ndikugwirizana nazo<br>8. Sindikukhulupilira<br>9. Sindikugwirizana nazo<br>10. Sindikugwirizana nazo olo pang'ono<br><br>88. Sindikufuna kuyankha |
| Comment            | Tafika pamapeto a kucheza kwathu. Zikomo chifukwa cha nthawi yanu. Pali chili chonse mukufuna kuwonjezera?              |                                                                                                                                                                                          |
| End Note           | Thank the participant for their time and give them transport reimbursement, if they did not come for an ART appointment |                                                                                                                                                                                          |
| Comments           | Enumerator comments                                                                                                     |                                                                                                                                                                                          |
| End of the survey! |                                                                                                                         |                                                                                                                                                                                          |

1  
2  
3 **14.7. APPENDIX G: Follow-up Survey - Male**  
4  
5

6  
7 **FOLLOW-UP SURVEY**  
8 **Identifying efficient linkages strategies for HIVST (IDEaL)**  
9 **Male**  
10  
11

12  
13  
14 **Complete this form for men who enrolled in the study 4-months ago**

15 **Date of Interview:** \_\_\_\_\_

16 **Site Code:** \_\_\_\_\_

17 **Full Name of Interviewer:** \_\_\_\_\_

18 **Participant Study ID#:** \_\_\_\_\_  
19  
20  
21

22

| #    | Question                                                                                                                      | Response                                                                                                                                                                                                                                                                                                                                                                            |
|------|-------------------------------------------------------------------------------------------------------------------------------|-------------------------------------------------------------------------------------------------------------------------------------------------------------------------------------------------------------------------------------------------------------------------------------------------------------------------------------------------------------------------------------|
| c1a  | Please think about your primary partner in the last 4 months.<br><br>Has your relationship changed in the last 4 months? How? | <input type="checkbox"/> Nothing changed (1)<br><input type="checkbox"/> Married (2)<br><input type="checkbox"/> Steady Girlfriend (3)<br><input type="checkbox"/> Moved out of the house (4)<br><input type="checkbox"/> Became an infrequent partner (5)<br><input type="checkbox"/> Separated (6)<br><input type="checkbox"/> Divorced (7)<br><input type="checkbox"/> Other (8) |
| c4a  | Have you disclosed your HIV status to this partner?                                                                           | <input type="checkbox"/> Yes (1)<br><input type="checkbox"/> No (0)                                                                                                                                                                                                                                                                                                                 |
| c5a  | Have you had any new children with this partner since we last spoke?                                                          | <input type="checkbox"/> Yes (1)<br><input type="checkbox"/> No (0)                                                                                                                                                                                                                                                                                                                 |
| c18a | Have you started ART in the past 4months?                                                                                     | <input type="checkbox"/> Yes (1)<br><input type="checkbox"/> No (0)<br><input type="checkbox"/> No, but I plan to link                                                                                                                                                                                                                                                              |

23  
24  
25  
26  
27  
28  
29  
30  
31  
32  
33  
34  
35  
36  
37  
38  
39  
40  
41  
42  
43  
44  
45  
46  
47  
48  
49  
50  
51  
52  
53  
54  
55  
56  
57  
58  
59  
60

|                                |                                                                                                                                                 |                                                                                                                         |
|--------------------------------|-------------------------------------------------------------------------------------------------------------------------------------------------|-------------------------------------------------------------------------------------------------------------------------|
| c18b                           | IF YES: When did you start ART?                                                                                                                 | <hr/> Day/Month/Year                                                                                                    |
| <b>Unintended Consequences</b> |                                                                                                                                                 |                                                                                                                         |
| c19a                           | Were unwantedly pressured to initiate ART?                                                                                                      | <input type="checkbox"/> Yes (1)<br><input type="checkbox"/> No (0)                                                     |
| c20a                           | After enrolling in the study, did anyone find out your HIV status against your will (unwanted disclosure)?                                      | <input type="checkbox"/> Yes (1)<br><input type="checkbox"/> No (0)                                                     |
| C20b                           | After enrolling in the study, did anyone find out your partners' HIV status against her will (unwanted disclosure)?                             | <input type="checkbox"/> Yes (1)<br><input type="checkbox"/> No (0)                                                     |
| c21a                           | After enrolling in the study, did your partner....<br><br>Threaten to hurt or harm you or someone you cared about.                              | <input type="checkbox"/> Yes (1)<br><input type="checkbox"/> No (0)<br><input type="checkbox"/> Refused to respond (99) |
| c22a                           | Insulted you or made you feel bad about yourself.                                                                                               | <input type="checkbox"/> Yes (1)<br><input type="checkbox"/> No (0)<br><input type="checkbox"/> Refused to respond (99) |
| c23a                           | Hit, slapped, kicked or did anything else meant to physically hurt you.                                                                         | <input type="checkbox"/> Yes (1)<br><input type="checkbox"/> No (0)<br><input type="checkbox"/> Refused to respond (99) |
| c21a                           | After enrolling in the study, did you ever do the following to your partner....<br><br>Threaten to hurt or harm her or someone she cared about. | <input type="checkbox"/> Yes (1)<br><input type="checkbox"/> No (0)<br><input type="checkbox"/> Refused to respond (99) |

|      |                                                                                                                                                                                                               |                                                                                                                                                                                                                                                                                                     |
|------|---------------------------------------------------------------------------------------------------------------------------------------------------------------------------------------------------------------|-----------------------------------------------------------------------------------------------------------------------------------------------------------------------------------------------------------------------------------------------------------------------------------------------------|
|      |                                                                                                                                                                                                               |                                                                                                                                                                                                                                                                                                     |
| c22a | Insulted her or made her feel bad about herself.                                                                                                                                                              | <input type="checkbox"/> Yes (1)<br><input type="checkbox"/> No (0)<br><input type="checkbox"/> Refused to respond (99)                                                                                                                                                                             |
| c23a | Hit, slapped, kicked or did anything else meant to physically hurt her.                                                                                                                                       | <input type="checkbox"/> Yes (1)<br><input type="checkbox"/> No (0)<br><input type="checkbox"/> Refused to respond (99)                                                                                                                                                                             |
| c24  | Slept with another woman                                                                                                                                                                                      | <input type="checkbox"/> Yes (1)<br><input type="checkbox"/> No (0)<br><input type="checkbox"/> Refused to respond (99)                                                                                                                                                                             |
| c25a | <p><i>Now, I am going to ask you a series of questions about who makes within this relationship. Please think about the last 4 months</i></p> <p>Who usually decides how the money you earn will be used?</p> | <input type="checkbox"/> Yourself (respondent)<br><input type="checkbox"/> Jointly (This partner and you together)<br><input type="checkbox"/> Mainly this partner<br><input type="checkbox"/> Someone else<br><input type="checkbox"/> Do not earn money<br><input type="checkbox"/> Refuse to say |
| c26a | Who usually decides how your partner's earnings will be used?                                                                                                                                                 | <input type="checkbox"/> Yourself (respondent)<br><input type="checkbox"/> Jointly (This partner and you together)<br><input type="checkbox"/> Mainly this partner<br><input type="checkbox"/> Someone else<br><input type="checkbox"/> Refuse to say                                               |



|      |                                                             |                                                                                                                                                                                                                                                       |
|------|-------------------------------------------------------------|-------------------------------------------------------------------------------------------------------------------------------------------------------------------------------------------------------------------------------------------------------|
| c27a | Who usually makes decisions about health care for yourself? | <input type="checkbox"/> Yourself (respondent)<br><input type="checkbox"/> Jointly (This partner and you together)<br><input type="checkbox"/> Mainly this partner<br><input type="checkbox"/> Someone else<br><input type="checkbox"/> Refuse to say |
|------|-------------------------------------------------------------|-------------------------------------------------------------------------------------------------------------------------------------------------------------------------------------------------------------------------------------------------------|

| <b>D. Additional Questions</b> |                                                                                            |                                                                     |
|--------------------------------|--------------------------------------------------------------------------------------------|---------------------------------------------------------------------|
| #                              | Question                                                                                   | Response                                                            |
| d1                             | Would you recommend the ART intervention you were part of to other male friends or family? | <input type="checkbox"/> Yes (1)<br><input type="checkbox"/> No (0) |
| d2                             | Are you happy that you participated in the ART intervention?                               | <input type="checkbox"/> Yes (1)<br><input type="checkbox"/> No (0) |

Thank the participant for their time and end the survey

**BASELINE SURVEY**  
**Identifying efficient linkages strategies for HIVST (IDEaL)**  
 Male (Chichewa)

**Complete this form for men who enrolled in the study 4-months ago**

**Date of Interview:** \_\_\_\_\_

**Site Code:** \_\_\_\_\_

**Full Name of Interviewer:** \_\_\_\_\_

**Participant Study ID#:** \_\_\_\_\_

| #    | Question                                                                                                                                                                          | Response                                                                                                                                                                                                                                                                                                                                                                                          |
|------|-----------------------------------------------------------------------------------------------------------------------------------------------------------------------------------|---------------------------------------------------------------------------------------------------------------------------------------------------------------------------------------------------------------------------------------------------------------------------------------------------------------------------------------------------------------------------------------------------|
| c1a  | <p>Taganizani za bwenzi lanu logonana nalo lomwe lakhala lodalilika kwa miyese folo yapitayi.</p> <p>Kodi ubwenzi wanu wasintha munjira ina iliyonse mu miyezi folo yapitayi?</p> | <input type="checkbox"/> Palibe chasintha (1)<br><input type="checkbox"/> Married (2)<br><input type="checkbox"/> Chibwenzi chokhazikika (3)<br><input type="checkbox"/> Chibwenzi Chinachoka pakhomo (4)<br><input type="checkbox"/> Chibwenzi cha apo ndi apo (5)<br><input type="checkbox"/> Separated (6)<br><input type="checkbox"/> Banja linatha (7)<br><input type="checkbox"/> Other (8) |
| c4a  | Kodi munawauza abwenzi anuwa za mmene mulili mnthupi mwanu ku mbali ya HIV?                                                                                                       | <input type="checkbox"/> Eya(1)<br><input type="checkbox"/> Ayi(0)                                                                                                                                                                                                                                                                                                                                |
| c5a  | Kodi mwakhala ndi ana ndi abwenzi anuwa kuchokera ulendo watha tinayankhulana?                                                                                                    | <input type="checkbox"/> Eya(1)<br><input type="checkbox"/> Ayi(0)                                                                                                                                                                                                                                                                                                                                |
| c18a | Kodi munayamba kumwa mankhwala a ma ARV mu miyezi folo yapitayi?                                                                                                                  | <input type="checkbox"/> Eya(1)<br><input type="checkbox"/> Ayi(2)<br><input type="checkbox"/> Ayi, ndikulingalira zoyamba (3)                                                                                                                                                                                                                                                                    |

|                                |                                                                                                                                                                |                                                                                                                        |
|--------------------------------|----------------------------------------------------------------------------------------------------------------------------------------------------------------|------------------------------------------------------------------------------------------------------------------------|
| c18b                           | Ngati eya: Munayamba liti mankwala a ma ARV?                                                                                                                   | <hr/> Tsiku/Mwezi/Chaka                                                                                                |
| <b>Unintended Consequences</b> |                                                                                                                                                                |                                                                                                                        |
| c19a                           | Munayamba kumwa mankhwala a ma ARV mokakamizidwa?                                                                                                              | <input type="checkbox"/> Eya(1)<br><input type="checkbox"/> Ayi(0)                                                     |
| c20a                           | Chilowereni mu study, alipo omwe anadziwa za m'mene mulili mnthupi mwanu kumbari ya HIV inu musakufuna? (Kuwulula za HIV mosafuna)                             | <input type="checkbox"/> Eya(1)<br><input type="checkbox"/> Ayi(0)                                                     |
| C20b                           | Chilowereni mu study, alipo omwe anadziwa za m'mene mulili mnthupi mwa bwenzi lanu kumbari ya HIV eni asakufuna? (Kuwulula za HIV mosafuna)                    | <input type="checkbox"/> Eya(1)<br><input type="checkbox"/> Ayi(0)                                                     |
| c21a                           | Chilowereni mu study, kodi bwenzi lanu.....<br><br>Linaospyeza kuvulaza inu kapena wina aliyense amane mumamukonda?                                            | <input type="checkbox"/> Eya(1)<br><input type="checkbox"/> Ayi(0)<br><input type="checkbox"/> Refused to respond (99) |
| c22a                           | Linakunyozi kapena kukunyozi                                                                                                                                   | <input type="checkbox"/> Eya(1)<br><input type="checkbox"/> Ayi(0)<br><input type="checkbox"/> Refused to respond (99) |
| c23a                           | Anakumenyani ndikukupwetekani.                                                                                                                                 | <input type="checkbox"/> Eya(1)<br><input type="checkbox"/> Ayi(0)<br><input type="checkbox"/> Refused to respond (99) |
| c21a                           | Chilowereni mu study kodi munayamba mwapangapo zotsatirazi kwa bwenzi anu....<br><br>Kuosyeza kuti muvulaza bwenzi lanu kapena wina aliyense yemwe amamukonda. | <input type="checkbox"/> Eya(1)<br><input type="checkbox"/> Ayi(0)<br><input type="checkbox"/> Refused to respond (99) |

|      |                                                                                                                                                                         |                                                                                                                                                                                                                                                                 |
|------|-------------------------------------------------------------------------------------------------------------------------------------------------------------------------|-----------------------------------------------------------------------------------------------------------------------------------------------------------------------------------------------------------------------------------------------------------------|
| c22a | Kunyoza kapenanso kumupangitsa kuti azizikayikila.                                                                                                                      | <input type="checkbox"/> Eya(1)<br><input type="checkbox"/> Ayi(0)<br><input type="checkbox"/> Refused to respond (99)                                                                                                                                          |
| c23a | Kumumenya ndikumupweteka.                                                                                                                                               | <input type="checkbox"/> Eya(1)<br><input type="checkbox"/> Ayi(0)<br><input type="checkbox"/> Refused to respond (99)                                                                                                                                          |
| c24  | Kuchita mchitidwe ogonana ndi mzimayi wina                                                                                                                              | <input type="checkbox"/> Eya(1)<br><input type="checkbox"/> Ayi(0)<br><input type="checkbox"/> Refused to respond (99)                                                                                                                                          |
| c25a | <p>Tsopano ndikufunsani mafunso okhuzana ndi omwe amalamula pakhomo panu.</p> <p>Kodi amalamula za mmene ndalama zomwe mwapeza zitagwilitsidwile ntchito ndi ndani?</p> | <input type="checkbox"/> Amene akuyankha<br><input type="checkbox"/> Mogwirizana<br><input type="checkbox"/> Nthawi zambiri bwenzi<br><input type="checkbox"/> Munthu wina<br><input type="checkbox"/> Sapeza ndalama<br><input type="checkbox"/> Refuse to say |
| c26a | Kodi amalamulila za mmene ndalama za abwenzu anu zingagwilitsidwile ntchito ndi ndani?                                                                                  | <input type="checkbox"/> Amene akuyankha<br><input type="checkbox"/> Mogwirizana<br><input type="checkbox"/> Nthawi zambiri bwenzi<br><input type="checkbox"/> Munthu wina<br><input type="checkbox"/> Refuse to say                                            |
| c27a | Kodi amene amakhala ndi ulamulilo pa chisamalilo cha moyo wanu ndi ndani?                                                                                               | <input type="checkbox"/> Amene akuyankha<br><input type="checkbox"/> Mogwirizana<br><input type="checkbox"/> Nthawi zambiri bwenzi<br><input type="checkbox"/> Munthu wina<br><input type="checkbox"/> Refuse to say                                            |

| Additional Questions |                                                                                                                   |                                                                    |
|----------------------|-------------------------------------------------------------------------------------------------------------------|--------------------------------------------------------------------|
| d1                   | Kodi mungalimbikitse anzanu ena achizibambo kapena apabanja panu kutenga nawo mbali mu ART intervention munaliyi? | <input type="checkbox"/> Eya(1)<br><input type="checkbox"/> Ayi(0) |
| d2                   | Kodi muli okondwa kuti munatenga nawo mbali mu ART intervention?                                                  | <input type="checkbox"/> Eya(1)<br><input type="checkbox"/> Ayi(0) |

1  
2  
3  
4  
5 **14.8. APPENDIX H: Follow-up Survey – Female**  
6  
7

8  
9 **FOLLOW-UP SURVEY**  
10 **Identifying efficient linkages strategies for HIVST (IDEaL)**  
11 **Female**  
12  
13

14  
15  
16 **Complete this form for women whose:**

17 **(1) Partners consented to be in the study 4-months ago**

18  
19 **Date of Interview:** \_\_\_\_\_

20 **Site Code:** \_\_\_\_\_

21 **Full Name of Interviewer:** \_\_\_\_\_

22 **Participant Study ID#:** \_\_\_\_\_  
23  
24  
25

| #    | Question                                                                                                                      | Response                                                                                                                                                                                                                                                                                                                                                                           |
|------|-------------------------------------------------------------------------------------------------------------------------------|------------------------------------------------------------------------------------------------------------------------------------------------------------------------------------------------------------------------------------------------------------------------------------------------------------------------------------------------------------------------------------|
| c1a  | Please think about your primary partner in the last 4 months.<br><br>Has your relationship changed in the last 4 months? How? | <input type="checkbox"/> Nothing changed (1)<br><input type="checkbox"/> Married (2)<br><input type="checkbox"/> Steady Boyfriend (3)<br><input type="checkbox"/> Moved out of the house (4)<br><input type="checkbox"/> Became an infrequent partner (5)<br><input type="checkbox"/> Separated (6)<br><input type="checkbox"/> Divorced (7)<br><input type="checkbox"/> Other (8) |
| c4a  | Have you disclosed your HIV status to this partner?                                                                           | <input type="checkbox"/> Yes (1)<br><input type="checkbox"/> No (0)                                                                                                                                                                                                                                                                                                                |
| c5a  | Have you had any new children with this partner since we last spoke?                                                          | <input type="checkbox"/> Yes (1)<br><input type="checkbox"/> No (0)                                                                                                                                                                                                                                                                                                                |
| c18a | To your knowledge, did your partner start ART?                                                                                | <input type="checkbox"/> Yes (1)<br><input type="checkbox"/> No, they do not plan to link (2)<br><input type="checkbox"/> No, but they plan to link (3)                                                                                                                                                                                                                            |

|                                |                                                                                                                     |                                                                                                                         |
|--------------------------------|---------------------------------------------------------------------------------------------------------------------|-------------------------------------------------------------------------------------------------------------------------|
|                                |                                                                                                                     | <input type="checkbox"/> Unsure (88)                                                                                    |
| <b>Unintended Consequences</b> |                                                                                                                     |                                                                                                                         |
| c19a                           | Did you pressure your partner to initiate ART?                                                                      | <input type="checkbox"/> Yes (1)<br><input type="checkbox"/> No (0)                                                     |
| c20a                           | After enrolling in the study, did anyone find out your HIV status against your will (unwanted disclosure)?          | <input type="checkbox"/> Yes (1)<br><input type="checkbox"/> No (0)                                                     |
| C20b                           | After enrolling in the study, did anyone find out your partners' HIV status against his will (unwanted disclosure)? | <input type="checkbox"/> Yes (1)<br><input type="checkbox"/> No (0)                                                     |
| c21a                           | After enrolling in the study, did your partner....<br><br>Threaten to hurt or harm you or someone you cared about.  | <input type="checkbox"/> Yes (1)<br><input type="checkbox"/> No (0)<br><input type="checkbox"/> Refused to respond (99) |
| c22a                           | Insulted you or made you feel bad about yourself.                                                                   | <input type="checkbox"/> Yes (1)<br><input type="checkbox"/> No (0)<br><input type="checkbox"/> Refused to respond (99) |
| c23a                           | Hit, slapped, kicked or did anything else meant to physically hurt you.                                             | <input type="checkbox"/> Yes (1)<br><input type="checkbox"/> No (0)<br><input type="checkbox"/> Refused to respond (99) |
| C23b                           | Forced sexual intercourse and other forms of sexual coercion                                                        | <input type="checkbox"/> Yes (1)<br><input type="checkbox"/> No (0)<br><input type="checkbox"/> Refused to respond (99) |

|                                                                            |      |                                                                                                                                                                         |                                                                                                                                                                                                                                                                                                     |
|----------------------------------------------------------------------------|------|-------------------------------------------------------------------------------------------------------------------------------------------------------------------------|-----------------------------------------------------------------------------------------------------------------------------------------------------------------------------------------------------------------------------------------------------------------------------------------------------|
| 1<br>2<br>3<br>4<br>5<br>6<br>7<br>8<br>9                                  | C23c | Slept with another woman.                                                                                                                                               | <input type="checkbox"/> Yes (1)<br><input type="checkbox"/> No (0)<br><input type="checkbox"/> Refused to respond (99)                                                                                                                                                                             |
| 10<br>11<br>12<br>13<br>14<br>15<br>16<br>17                               | c24a | Ended the relationship                                                                                                                                                  | <input type="checkbox"/> Yes (1)<br><input type="checkbox"/> No (0)<br><input type="checkbox"/> Refused to respond (99)                                                                                                                                                                             |
| 18<br>19<br>20<br>21<br>22<br>23<br>24<br>25<br>26<br>27<br>28<br>29<br>30 | c25a | <p><i>Now, I am going to ask you a series of questions about who makes within this relationship</i></p> <p>Who usually decides how the money you earn will be used?</p> | <input type="checkbox"/> Yourself (respondent)<br><input type="checkbox"/> Jointly (This partner and you together)<br><input type="checkbox"/> Mainly this partner<br><input type="checkbox"/> Someone else<br><input type="checkbox"/> Do not earn money<br><input type="checkbox"/> Refuse to say |
| 31<br>32<br>33<br>34<br>35<br>36<br>37<br>38<br>39<br>40<br>41             | c26a | Who usually decides how your partner's earnings will be used?                                                                                                           | <input type="checkbox"/> Yourself (respondent)<br><input type="checkbox"/> Jointly (This partner and you together)<br><input type="checkbox"/> Mainly this partner<br><input type="checkbox"/> Someone else<br><input type="checkbox"/> Refuse to say                                               |
| 42<br>43<br>44<br>45<br>46<br>47<br>48<br>49<br>50<br>51<br>52             | c27a | Who usually makes decisions about health care for yourself?                                                                                                             | <input type="checkbox"/> Yourself (respondent)<br><input type="checkbox"/> Jointly (This partner and you together)<br><input type="checkbox"/> Mainly this partner<br><input type="checkbox"/> Someone else<br><input type="checkbox"/> Refuse to say                                               |



| Additional Questions |                                                                           |                                                                     |
|----------------------|---------------------------------------------------------------------------|---------------------------------------------------------------------|
| d1                   | Would you recommend the ART intervention to other male friends or family? | <input type="checkbox"/> Yes (1)<br><input type="checkbox"/> No (0) |
| d2                   | Are you happy your partner was in the ART intervention?                   | <input type="checkbox"/> Yes (1)<br><input type="checkbox"/> No (0) |

Thank the participant for their time and end the survey

**FOLLOW-UP SURVEY**  
**Identifying efficient linkages strategies for HIVST (IDEaL)**  
 Female (Chichewa)

**Complete this form for women whose:**

**(1) Partners consented to be in the study 4-months ago**

**Date of Interview:** \_\_\_\_\_

**Site Code:** \_\_\_\_\_

**Full Name of Interviewer:** \_\_\_\_\_

**Participant Study ID#:** \_\_\_\_\_

| #    | Question                                                                                                                                                                                                    | Response                                                                                                                                                                                                                                                                                                                                                                                      |
|------|-------------------------------------------------------------------------------------------------------------------------------------------------------------------------------------------------------------|-----------------------------------------------------------------------------------------------------------------------------------------------------------------------------------------------------------------------------------------------------------------------------------------------------------------------------------------------------------------------------------------------|
| c1a  | <p>Taganizani za bwenzi lanu logonana nalo lomwe lakhala lodalilika kwa miyesi folo yapitayi.</p> <p>Kodi ubwenzi wanu wasintha munjira ina iliyonse mu miyezi folo yapitayi?</p> <p>Bwenzi lokhazikika</p> | <input type="checkbox"/> Palibe chasintha (1)<br><input type="checkbox"/> Married (2)<br><input type="checkbox"/> Bwenzi lokhazikika (3)<br><input type="checkbox"/> Chibwenzi Chinachoka pakhomo (4)<br><input type="checkbox"/> Chibwenzi cha apo ndi apo (5)<br><input type="checkbox"/> Separated (6)<br><input type="checkbox"/> Banja linatha (7)<br><input type="checkbox"/> Other (8) |
| c4a  | Kodi munawauza abwenzi anuwa za mmene mulili mnthupi mwanu ku mbali ya HIV?                                                                                                                                 | <input type="checkbox"/> Eya(1)<br><input type="checkbox"/> Ayi(0)                                                                                                                                                                                                                                                                                                                            |
| c5a  | <p>Have you had any new children with this partner since we last spoke?</p> <p>Kodi mwakhala ndi ana ndi abwenzi anuwa kuchokera ulendo watha tinayankhulana?</p>                                           | <input type="checkbox"/> Eya(1)<br><input type="checkbox"/> Ayi(0)                                                                                                                                                                                                                                                                                                                            |
| c18a | Mongamukudziwira, kodi bwenzi lanu linayamba kumwa mwankhala a ama ARV?                                                                                                                                     | <input type="checkbox"/> Eya<br><input type="checkbox"/> Ayi, sakulingalira zoyamba kumwa mwankhwala a ma ARV<br><input type="checkbox"/> Ayi, koma                                                                                                                                                                                                                                           |

|                                |                                                                                                                                             |                                                                                                                        |
|--------------------------------|---------------------------------------------------------------------------------------------------------------------------------------------|------------------------------------------------------------------------------------------------------------------------|
|                                |                                                                                                                                             | akulingalira zoyamba<br><input type="checkbox"/> Unsure (88)                                                           |
| <b>Unintended Consequences</b> |                                                                                                                                             |                                                                                                                        |
| c19a                           | Kodi munawakakamiza a bwenzi anu kuti ayambe kumwa mankhwala a ama ARV?                                                                     | <input type="checkbox"/> Eya(1)<br><input type="checkbox"/> Ayi(0)                                                     |
| c20a                           | Chilowereni mu study, alipo omwe anadziwa za m'mene mulili mnthupi mwanu kumbari ya HIV inu musakufuna? (Kuwulula za HIV mosafuna)          | <input type="checkbox"/> Eya(1)<br><input type="checkbox"/> Ayi(0)                                                     |
| C20b                           | Chilowereni mu study, alipo omwe anadziwa za m'mene mulili mnthupi mwa bwenzi lanu kumbari ya HIV eni asakufuna? (Kuwulula za HIV mosafuna) | <input type="checkbox"/> Eya(1)<br><input type="checkbox"/> Ayi(0)                                                     |
| c21a                           | Chilowereni mu study, kodi bwenzi lanu.....<br><br>Linaospyeza kuvulaza inu kapena wina aliyense amane mumamukonda?                         | <input type="checkbox"/> Eya(1)<br><input type="checkbox"/> Ayi(0)<br><input type="checkbox"/> Refused to respond (99) |
| c22a                           | Anakunyoza kapenanso kukupangitsani kuti muzizikayikila.                                                                                    | <input type="checkbox"/> Eya(1)<br><input type="checkbox"/> Ayi(0)<br><input type="checkbox"/> Refused to respond (99) |
| c23a                           | Anakumenyani ndikukupwetekani.                                                                                                              | <input type="checkbox"/> Eya(1)<br><input type="checkbox"/> Ayi(0)<br><input type="checkbox"/> Refused to respond (99) |
| C23b                           | Kukukakamizani kugonana ndi zinthu zina?                                                                                                    | <input type="checkbox"/> Eya(1)<br><input type="checkbox"/> Ayi(0)<br><input type="checkbox"/> Refused to respond (99) |
| C23c                           | Kuchita mtchitidwe ogonana ndi mzimayi wina                                                                                                 | <input type="checkbox"/> Eya(1)<br><input type="checkbox"/> Ayi(0)                                                     |

|      |                                                                                                                                                                  |                                                                                                                                                                                                                      |
|------|------------------------------------------------------------------------------------------------------------------------------------------------------------------|----------------------------------------------------------------------------------------------------------------------------------------------------------------------------------------------------------------------|
|      |                                                                                                                                                                  | <input type="checkbox"/> Refused to respond (99)                                                                                                                                                                     |
| c24a | Kuthetsa Chibwenzi                                                                                                                                               | <input type="checkbox"/> Eya(1)<br><input type="checkbox"/> Ayi(0)<br><input type="checkbox"/> Refused to respond (99)                                                                                               |
| c25a | Tsopano ndikufunsani mafunso okhuzana ndi omwe amalamula pakhomu panu.<br><br>Kodi amalamula za mmene ndalama zomwe mwapeza zitagwilitsidwile ntchito ndi ndani? | <input type="checkbox"/> Amene akuyankha<br><input type="checkbox"/> Mogwirizana<br><input type="checkbox"/> Nthawi zambiri bwenzi<br><input type="checkbox"/> Munthu wina<br><input type="checkbox"/> Refuse to say |
| c26a | Kodi amalamulila za mmene ndalama za abwenzi anu zingagwilitsidwile ntchito ndi ndani?                                                                           | <input type="checkbox"/> Amene akuyankha<br><input type="checkbox"/> Mogwirizana<br><input type="checkbox"/> Nthawi zambiri bwenzi<br><input type="checkbox"/> Munthu wina<br><input type="checkbox"/> Refuse to say |
| c27a | Kodi amene amakhala ndi ulamulilo pa chisamalilo cha moyo wanu ndi ndani?                                                                                        | <input type="checkbox"/> Amene akuyankha<br><input type="checkbox"/> Mogwirizana<br><input type="checkbox"/> Nthawi zambiri bwenzi<br><input type="checkbox"/> Munthu wina<br><input type="checkbox"/> Refuse to say |

| Additional Questions |                                                                                                                   |                                                                    |
|----------------------|-------------------------------------------------------------------------------------------------------------------|--------------------------------------------------------------------|
| d1                   | Kodi mungalimbikitse anzanu ena achizibambo kapena apabanja panu kutenga nawo mbali mu ART intervention munaliyi? | <input type="checkbox"/> Eya(1)<br><input type="checkbox"/> Ayi(0) |
| d2                   | Kodi muli okondwa kuti munatenga nawo mbali mu ART intervention?                                                  | <input type="checkbox"/> Eya(1)<br><input type="checkbox"/> Ayi(0) |

## 14.9. APPENDIX I: Data Extraction Tool

---

### DATA EXTRACTION TOOL

#### Identifying efficient linkages strategies for HIVST (IDEaL)

English only

---

#### **INSTRUCTIONS:**

The Medical Chart Review will be used to link the male study participant with the facilities ART records and to document their facility visits over the 4-months of study participation. Please follow the instructions to prepare for data collection (1) gather all ART registers that were active between DAY MONTH YEAR up to today (2) enter and re-enter the participant ID's who have reached the 4-month follow up period into the tablet (3) once you have re-entered, the tablet will provide you with identifying information about the male study participant. (5) match the participants information with information provided by the ART register to see if the participant initiated ART or not. If a participant did not initiate care (i.e. you cannot find him in the ART register), still enter the initial data points and indicate that the participant did not

| Code     | Question                        | Responses                                                                                                                                                                                                                                                                                                                                                                                                                                       |
|----------|---------------------------------|-------------------------------------------------------------------------------------------------------------------------------------------------------------------------------------------------------------------------------------------------------------------------------------------------------------------------------------------------------------------------------------------------------------------------------------------------|
| pid      | Please enter the Participant ID |                                                                                                                                                                                                                                                                                                                                                                                                                                                 |
| district | District                        | <input type="checkbox"/> Chickwawa<br><input type="checkbox"/> Nkhotakota<br><input type="checkbox"/> Lilongwe<br><input type="checkbox"/> Kasungu                                                                                                                                                                                                                                                                                              |
| site     | Facility name                   | <input type="checkbox"/> Chickwawa District Hospital<br><input type="checkbox"/> St. Montford Mission Hospital<br><input type="checkbox"/> Kalemba Community Hospital<br><input type="checkbox"/> Kasungu District Hospital<br><input type="checkbox"/> Nkhoma Community Hospital<br><input type="checkbox"/> Mponela Rural Hospital<br><input type="checkbox"/> Deayang Luke Hospital<br><input type="checkbox"/> Nkhotakota District Hospital |

|            |                                                                                                                                                                                                                                                                                                                                                                                                                                                                                                                                                                                                                                                             |                                                                                                             |
|------------|-------------------------------------------------------------------------------------------------------------------------------------------------------------------------------------------------------------------------------------------------------------------------------------------------------------------------------------------------------------------------------------------------------------------------------------------------------------------------------------------------------------------------------------------------------------------------------------------------------------------------------------------------------------|-------------------------------------------------------------------------------------------------------------|
|            |                                                                                                                                                                                                                                                                                                                                                                                                                                                                                                                                                                                                                                                             | <input type="checkbox"/> Nsanje District Hospital<br><input type="checkbox"/> Ngabu Rural Hospital          |
|            | <p><i>We want to know if this participant initiated ART. Please look at the ART register used at the clinic between DATE MONTH YEAR up to today</i></p> <p><i>Instructions: Look for the below information in the ART register, matching the below participant with a name in the ART register.</i></p> <p><i>Sometimes it is hard to find an exact match in the ART register. Consider it a match if 3 of the 4 data points match. For example, someone's name may be different, but the age, and village/residence matches. Consider this the same person.</i></p> <p><i>CLIENT NAME:</i></p> <p><i>AGE:</i></p> <p><i>Ta:</i></p> <p><i>Village:</i></p> |                                                                                                             |
| found_art  | Was the participant found in the ART register?                                                                                                                                                                                                                                                                                                                                                                                                                                                                                                                                                                                                              | <input type="checkbox"/> Yes (1) – proceed to next question<br><input type="checkbox"/> No (0) – end survey |
| art_number | What is the participant assigned ART number?                                                                                                                                                                                                                                                                                                                                                                                                                                                                                                                                                                                                                |                                                                                                             |
| art_date   | What is the clients ART start date?                                                                                                                                                                                                                                                                                                                                                                                                                                                                                                                                                                                                                         | <p>____/____/____</p> <p>Day    Month    Year</p>                                                           |

|                      |                                                                                                        |                                                                                                             |
|----------------------|--------------------------------------------------------------------------------------------------------|-------------------------------------------------------------------------------------------------------------|
|                      | <i>Use the ART number to find the paper Mastercard OR look up the participant in the Baobab system</i> |                                                                                                             |
| mastercard_fo<br>und | Did you find the mastercard/baobab record?                                                             | <input type="checkbox"/> Yes (1) – proceed to next question<br><input type="checkbox"/> No (0) – end survey |
| tb                   | At initiation: TB                                                                                      | <input type="checkbox"/> Yes (1)<br><input type="checkbox"/> No (0)                                         |
| ks                   | At initiation: KS                                                                                      | <input type="checkbox"/> Yes (1)<br><input type="checkbox"/> No (0)                                         |
| pillcount            | Number of pills given                                                                                  |                                                                                                             |
| nextapp_date         | Date of next appointment                                                                               | ____ / ____ / ____<br>Day    Month    Year                                                                  |
| nextconsult_d<br>ate | Date of next consultation visit                                                                        | ____ / ____ / ____<br>Day    Month    Year                                                                  |

**END OF SURVEY**

## 14.10. APPENDIX J: In-Depth Interview Guide – Female

---

### IN-DEPTH INTERVIEW GUIDE

#### Identifying efficient linkages strategies for HIVST (IDEaL)

#### Female

---

#### BEGIN RECORDING

Original Study ID: \_\_\_\_\_

Repeat Original Study ID: \_\_\_\_\_

State if male or female respondent \_\_\_\_\_

Health Facility: \_\_\_\_\_

Date of Interview: \_\_\_\_\_

Full Name of Interviewer: \_\_\_\_\_

District where respondent Lives: \_\_\_\_\_

#### Open- Ended Questions

*Note: The in-depth interview will be open-ended and guided by the respondent's answers. This outline reflects a general guide for the in-depth interviews.*

*The interviews are meant to help us understand barriers and facilitators to ART initiation. We are also interested in their thoughts on new interventions we are developing to help men start ART. The following questions are meant to guide interviewers. Actual questions asked during the interview will vary based on participant responses.*

#### DEMOGRAPHICS:

Demographics on the female participant not collected. Already in the original study. Just make sure the Original Study ID is documented correctly.

1. What type of job/work does your partner do?
  - a. If he does not work, why?
  - b. Does he do anything else to earn money?
2. What time of day/week is your partner usually busy?
3. Where does he spend most of his time when he is not working?
  - a. *Probe: At the bar, watching football, at church, at home...*
4. How long have you been in a relationship with your sexual partner (whom you gave the HIVST kit to)



**HIV TESTING:**

Now I'd like to talk to you about you and your partner's experience with HIV services

- 1) To your knowledge, has your partner tested for HIV before you gave him the HIV-self testing kit?
  - a) IF YES, did he tell you the result? What was his result?
  - b) IF HIV+: At that time, did he start ART? IF NO: Why not?
- 2) Think about when you gave the HIV self-test kit to your sexual partner (show the kit).
  - a) How did your partner feel about his HIV positive test result? How did the result affect him?
  - b) How did you feel after your partner received an HIV positive status on the HIV self-test kit? How did the result affect you?
  - c) Did your relationship change at all after he received an HIV-positive status? How?
  - d) Did he talk to anyone about it?/ who?
  - e) Did he disclose to anyone besides you? Why/why not?

**ART UPTAKE:**

- 1) After he tested HIV-positive, did he initiate ART? Why/Why not?
  - a) IF INITIATED ART: How long did it take him to initiate ART? (several weeks, several months?). Why did you initiate ART so quickly/slowly? /

We know starting ART is difficult.

- 1) What do you think is the most difficult thing about starting ART for your partner right now?
  - a) Do you think this is the same for men and for women? How is it different?
  - b) How does taking ART affect one's daily activities? (schedule/routine) In bad ways? In good ways? Is it different for men? How?
  - c) How does taking ART affect relationships? In bad ways? In good ways? Is it different for men? How?
  - d) Out of all these things you mentioned, what do you think is the biggest concern/problem for your partner?

**FOR MEN WHO ARE CONSIDERED LOSS-TO-FOLLOW UP**

1. Since we saw you last, we haven't been able to follow up with your partner. From your perspective, why do you think this is?
2. Since your partner was enrolled in our study, what kind of things did you notice or did he mention to you related to HIV health services?
  - a. *Probe: phone calls/SMS or speak one-on-one to a health care worker? Was your partner visited by a health care professional within your home or in the community?*
3. Has your partner mentioned any of these interactions to anyone?
  - a. *Probe: friends, family, community members*
4. How did your partner react to these things? Did he like/dislike them? What did he do when they happened?
  - a. *Probe: phone call, SMS, in-person visit, home-based ART*
5. How did you react to these things? Did you like/dislike them?
  - a. *Probe: Was there any reaction amongst your family, friends or the community to these things?*
  - b. *If so, how did this affect your partner and/or you?*

**SUGGESTIONS FOR ART SERVICES**

Thank you for all the information. We would like to develop ART services that meet the needs of individuals in your community. We understand that men may face different challenges than women. I would like to know your opinion about what is needed in order to make ART services easy to access and use.

- 1) Could you describe the ideal way ART services would be given to your partner? If the clinic could do anything ...
  - a) When would he want to pick up ART?
    - i) Probe: day of week, time of day?
    - ii) *Why do you say this?*
  - b) Where would he want to pick up ART?
    - i) Probe: clinic near you, clinic far from you, somewhere in the community (WHERE SPECIFICALLY), at your home?
    - ii) *Why do you say this?*
- 2) Do you think your partner needs more HIV-related information? About the benefits of ART, how to keep his status a secret, or how to disclose his status, about other aspects of his health?
  - a) IF YES: How would he want to get this information? In person (one on one, pamphlet, radio, phone call, ...)
  - i) Probe: IF YES: WHO would he like to talk to about this information? (Provider, expert client, other community member)
- 3) Does he need support? For example, reminders to go to the health facility, someone to talk to regularly about what he is going through with ART, help disclosing his status, anything else).
  - a) *Probe: IF YES: How would he want to get this support? In person (one on one, pamphlet, radio, phone call)*
  - b) *Probe: IF YES: WHO would he like to talk to about this support? (Provider, expert client, other community member)*
- 4) Out of time of pick up, location, more information, or more support, what are the most important factors for your partner to use ART services?
  - a) *PROBE: Think about other males. What do you think they would say is the most important factor for men to use ART services?*

## **SPECIFIC SUGGESTIONS ON CURRENT INTERVENTIONS**

### **FOR MEN WHO ARE CONSIDERED LOSS-TO-FOLLOW UP**

1. As discussed earlier, your partner received [phone calls, texts, in person counseling, home-based ART].
  - a. *Do you feel that this was enough to encourage him to start ART?*
    - i. *If NO, what would you have done differently? (frequency, content, location)*
    - ii. *If YES, why do you think they were sufficient?*
  - b. Are there any other ideas/services we should think about doing beside the ones we just talked about (appointment reminders, in-depth counseling, community/home ART)?/
    - i. PROBE: What is it?
    - ii. Why do you think this could work?

## CONCLUSION

Thank you for your time.

1. Is there anything else you would like to say about men's use of ART?
2. Is there anything else you would like to say about your own use of ART and how we can help make your experience better?

**STOP THE RECORDER AND MAKE SURE RECORDING IS SAVED.**

**THANK YOU FOR YOUR PARTICIPATION IN THIS INTERVIEW. LET ME ENCOURAGE YOU THAT ARVS CAN HELP YOU LIVE LONG AND HEALTHY.**

*The following general education messages should be conveyed to all male and female participants:*

- All people who have been tested HIV positive should start ART as soon as possible for their own health and to prevent passing the virus on to others.
- Serious diseases can occur even in patients with high CD4 count (>500), without any previous symptoms. Immediate ART greatly reduces this risk.
- People that start ART and continue lifelong without interruptions can remain healthy and live as long as people without HIV.
- Even though you may not feel sick, ART is still important to keep you healthy for the rest of your life.
- ART reduces the amount of virus in your body and therefore can reduce the chance that HIV is passed to your sex partners.
- Current ART regimens are easy to take and rarely cause serious side-effects. Some people have side effects in the first few weeks of treatment and these almost always go away. IF there are persistent side effects, an alternative HIV regimen can be given.

*NOTE: Be careful not to give any specific medical advice but rather refer respondents back to the clinic to speak to a provider.*

---

**IN-DEPTH INTERVIEW GUIDE**  
**Identifying efficient linkages strategies for HIVST (IDEaL)**  
 Female (Chichewa)

---

**BEGIN RECORDING**

Original Study ID: \_\_\_\_\_

Repeat Original Study ID: \_\_\_\_\_

State if male or female respondent \_\_\_\_\_

Health Facility: \_\_\_\_\_

Date of Interview: \_\_\_\_\_

Full Name of Interviewer: \_\_\_\_\_

District where respondent Lives: \_\_\_\_\_

**Demographics**

- 1) Kodi bwenzi lanu limagwira ntchito yanji kuti apeze ndalama?
  - a) Ngati sagwira ntchito ndi chifukwa chani?
  - b) Kodi amapanga zinthu zina zothandizira kupeza ndalama?
- 2) Kodi nthawi ndi nthawi iyi ya tsiku/sabata lomwe bwenzi lanu limakhala lotanganidwa?
- 3) Kodi nthawi yawo yambiri amakhala ali kuti ngati sakugwira ntchito?
- 4) Kodi mwakhala pa ubwenzi kwa nthawi yayitali bwanji ndi bwenzi lanu logonana nalo (lomwe munalipitsa ka chida koziyezela wekha HIV)

**HIV-Testing**

Pano ndimafuna ndikufunsi mafunso okhudzana ndi zomwe mwakumanapo nazo zokhudza thandizo la HIV.

1. Momwe mukudziwira kodi bwenzi lanu linayamba layezetsapo HIV musanawapatse kachida koziyeza wekha HIV?
  - a. Ngati eya, anakuwuzani zotsatira? Zotsatira zawo zinali zotani?
  - b. Ngati anapezeka ndi HIV nthawi imeneyo, anayamba kumwa ma ARV? Ngati ayi chifukwa chani?
2. Ganizirani nthawi yomwe mudapereka kachipangizo kodziyezera wekha HIV (awonetseni) kwa bwenzi lanu.
  - a. Kodi bwenzi lanu linanva bwanji atadziwa za zotsatira zawo za HIV? Zotsatirazo anazilandira bwanji?
  - b. Kodi munamva bwanji bwenzi lanu litalandira zotsatira zoti lili ndi kachilombo ka HIV

- pa kachipangizoka? Izi zinakukhudzani bwanji?
- c. Kodi ubwenzi wanu udasintha atalandira zotsatira zoti ali ndi kachilombo? Motani?
  - d. Kodi analankhulapo ndi wina aliyense? Mosatchula dzina, ndani?
  - e. Kodi anawuzapo wina aliyense za mthupi mwake kupatula inu? Chifukwa chani?

## ART Uptake

- 1) Atadziyeza ndi kupeza kuti ali ndi kachilombo, kodi adakayamba kumwa mankhwala? Chifukwa?
  - a) Kodi zinatenga nthawi yaitali bwanji asanayambe kumwa mankhwala a ma ARV? (masabata angapo, miyezi ingapo?) Kodi anayamba kumwa mankhwala mnsanga/mochedwa chifukwa chani?
- 2) Tikudziwa kuti kuyamba kumwa mankhwala a ARV kumavutirapo. Kodi mukuona kuti chovuta chachikulu pa kuyamba kumwa mankhwala ndi chani?
  - a) Kodi mukuganiza kuti izi ndi zofanana kwa amuna ndi akazi? Nzosiyan chifukwa chani?
  - b) Kodi kumwa mankhwala a ma ARV kumakhudza bwanji kagwiridwe ka ntchito ka munthu tsiku ndi tsiku (ntchito zomwe amagwiragwira) Mu njira yabwino kapena yobwera mmbuyo? Ndi zosiyan kwa amuna? Motani?
  - c) Kodi kumwa mankhwala a ma ARV kumakhudza bwanji mwaubwenzi? Mu njira yabwino kapena yobwera mmbuyo? Ndi zosiyan kwa amuna? Motani?
  - d) Pa zinthu zonse zomwe tambambikalana, mukuona kuti vuto lalikuru kwa bwenzi lanu ndi chani?

## FOR MEN WHO ARE CONSIDERED LOSS-TO-FOLLOW UP

- 1) Chiwonelaneni ulendo watha, talephela kuonananso ndi bwenzi lanu. Mumaganizo anu mukuona kuti zili motere chifukwa chani?
- 2) *Chilowereni cha bwenzi lanu mu study, mwaonako zinthu zotani kapena zomwe atchulako zokhudzana ndi thandizo la HIV?*
  - a) *Funsitsani: Lamya ya m'manja/uthenga wa pa lamya kapena kuyankhula ndi wazaumoyo? Kodi bwenzi lanu linayendeledwapo ndi wazaumoyo mu dela lanu kapena pafupi ndi nyumba yanu?*
- 3) Kodi bwenzi lanu lathculako mikumano iyi kwa wina aliyense?
  - a) *Funsitsani: Anzawo, achibale, anthu a mudela*
- 4) Kodi bwenzi lanu linapangapo chani pa zinthu izi? Anazikonda/sana zikonde? Anapanga chani zitachitika?
  - a) *Funsitsani: Lamya ya m'manja/uthenga wa pa lamya, kupita okha, thandizo la ARV lapakhomo*
- 5) Munanva bwanji kuzinthuzi? Munazikonda/simunazikonde?
  - a) *Achibale anapanga chilichonse, anzanu, anthu a mudela ku zinthu zimenezi?*
  - b) *Ngati zili choncho, izi zinawatani a bwenzi anu /inuyo*

## SUGGESTIONS FOR ART SERVICES

Zikomo chifukwa cha mayankho anu. Timafuna titakhazikitsa ndondomeko zokomera anthu mu dera lanu pokhudza thandizo la ma ARV. Tikudziwa kuti amuna amakumana ndi zophinja/mavuto osiyana

1  
2  
3 ndi amayi. Ndimafuna ndimve maganizo anu pa zofunika kuti tikonze bwino thandizoli kuti likhale  
4 losavuta kufikira ndi kugwiritsa ntchito.  
5

- 6  
7 1) Momwe mukuganizira, kodi mungandiuzeke njira yabwino kwambiri yomwe mukuganiza kuti  
8 thandizo la ARV lingamaperekedwere kwa bwenzi lanu? Chipatala chitatu chichitepo kanthu....  
9 a) Kodi bwenzi lanu lingafune lidzipita nthawi zotani ku chipatala kukatenga mankhwala  
10 i) Tsiku la mu sabata, nthawi?  
11 ii) *Ndi chifukwa chani?*  
12 b) Kodi ndi malo ati omwe bwenzi lanu lingakonde kumakatengerako ARV?  
13 i) Pa chipatala cha pafupi nanu, kutali nanu, kwina mu dela lino (MALO ATI KWENIKWENI)  
14 pakhomo panu  
15 ii) *Ndi chifukwa chani?*  
16  
17 2) Kodi mukuganiza kwanu, mukuona kuti bwenzi lanu likufunika uthenga wina owonjezera? Pa  
18 zokhudza ubwino wa ARV, momwe lingasungire chinsinsi cha momwe mthupi mwawo mulili kapena  
19 kuwauza ena za mthupi mwawo, zina zikhuzana ndi thanzi lawo?  
20 a) Bwenzi lanu lingakonde litalandira mu njira yotani uthengawu? Kukawapeza paokha (paokha,  
21 kulembedwa mu bukhu, pa wailesi, kuimbidwa fonu)  
22 b) Ndi NDANI amene bwenzi lanu lingakonde kulankhula naye za uthengawu? (Dokotala, Expert  
23 Client, anthu ena a mu dera)  
24  
25 3) Kodi mukuganiza kuti bwenzi lanu likufunika thandizo lapadera? Mwachitsanzo, kukumbutsidwa kuti  
26 lipite ku chipatala, kulankhula ndi munthu wina mowirikiza pa zomwe akukumana nazo pakumwa  
27 ARV, kuthandizidwa kuuza ena za mmomwe mthupi mwawo mulili ndi zina)  
28 a) *Bwenzi lanu lingakonde litalandira mu njira yotani thandizoli? Kukawapeza pawokha (pawokha,*  
29 *kulembedwa mu bukhu, pa wailesi, kuimbidwa fonu)*  
30 b) *Ndi NDANI amene bwenzi lanu lingakonde kulankhula naye za thandizoli? (Dokotala, Expert*  
31 *Client, anthu ena a mu dera)*  
32  
33 4) Potengera thandizo ndi chisamaliro cha ma ARV, pakati pa nthawi yokatengera mankhwala, malo ake,  
34 uthenga owonjezera ndi thandizo la padera, kodi mukuganiza kuti chofunikira kwambiri ndi chiti kwa  
35 bwenzi lanu?  
36 a) *Ganizirani amuna ena a mdera lanu. Kodi mukuganiza kuti iwo angatchule chani ngati chinthu*  
37 *chofunikira kwambiri kwa amuna pa zomwe tachula zija?*  
38  
39  
40  
41

## 42 **SPECIFIC SUGGESTIONS ON CURRENT INTERVENTIONS**

### 43 FOR MEN WHO ARE CONSIDERED LOSS-TO-FOLLOW UP

- 44  
45  
46  
47  
48 1) Monga takambirana kale poyamba, bwenzi lanu linalandira (Kuyimbilidwa lanyo, uthenga wa pa  
49 lanyo, malangizo, thandizo la ma ARV la pakhomo)  
50 a) *Mukuwona ngati izi zinali zokwanira kulimbikitsa bwenzi lanu kuyamba ma ARV?*  
51 i) *Ngati ayi ndi chani mukanapanga mosiyana? (malo)*  
52 ii) *Ngati eya mukuwona ngati zili zofunika chifukwa chani?*  
53  
54 2) Kodi pali maganizo ena omwe mukuona kuti angathandizepo kupatula omwe tatchulawa  
55 (kukumbutsana, uphungu wapadera, kugawa mankhwala kumudzi) ndi chani?  
56  
57  
58  
59  
60

- a) Ndi chani?
- b) Ndi chifukwa chani mukuona kuti zikhoza kuyenda bwino

## CONCLUSION

- 1) Zikomo chifukwa cha nthawi yanu. Pali choonjezera china chilichonse chomwe mungalankhulepo chokhudza kagwiritsidwe ntchito ka thandizo la ARV ndi amuna?
- 2) Pali chilichonse chokhudza kagwiritsidwe ntchito kanu ka thandizo la ma ARV ndi momwe tingakonzere thandizoli?

### **STOP THE RECORDER AND MAKE SURE RECORDING IS SAVED.**

ZIKOMO CHIFUKWA CHOTENGA NAWO MBALI MU KAFUKUFUKUYU. NDIMAFUNA NDIKULIMBIKITSANI KUTI MA ARV AKHOZA KUTHANDIZA INU KUKHALA MOYO WAUTALI NDINSO WATHANZI.

*The following general education messages should be conveyed to all male and female participants:*

- Anthu onse omwe ayezetsa ndi kupezeka ndi kachilombo ka HIV akuyenera kuyamba kumwa mankhwala a ma ARV mwamsangamsanga kuti zipundulire thanzi lawo komanso apewe kupatsira ena kachilombo.
- Matenda oopsa akhoza kugwira munthu ngakhale amene chiwerengero cha asilikali a mnthupi ndi ochulukana (kuposera 500) posaonetsa zizindikiro zoyamba. Mankhwala a ma ARV amachepetsa chiopsezochi.
- Anthu omwe ayamba kumwa ma ARV ndipo akupitiliza moyo wawo onse osalekalekeza akhoza kukhala moyo wa thanzi ndi wautali chimodzimodzi anthu omwe alibe kachilombo ka HIV.
- Ngakhale simukumva kudwala, mankhwala a ARV ndi ofunikirabe kuti mukhale ndi thanzi moyo wanu onse.
- Mankhwala a ma ARV amachepetsa mlingo wa tidzilombo mthupi mwanu kotero amachepetsa chiposezo chopatsira kachilombo kwa ena.
- Mankhwala omwe alipo pakadali pano a ma ARV ndiosavuta kumwa komanso sakhala ndi mavuto ambiri. Anthu ena amakhala ndi mavuto obwera kamba komwa mankhwala masabata oyambirira koma izi zimatha. Ngati zikupitilirabe pali mtundu wina wa mankhwala omwe akhoza kukupatsani.



## 14.11. APPENDIX K: In-Depth Interview Guide – Male

---

**IN-DEPTH INTERVIEW GUIDE**  
**Identifying efficient linkages strategies for HIVST (IDEaL)**  
 Male

---

**BEGIN RECORDING**

Original Study ID: \_\_\_\_\_

Repeat Original Study ID: \_\_\_\_\_

State if male or female respondent \_\_\_\_\_

Health Facility: \_\_\_\_\_

Date of Interview: \_\_\_\_\_

Full Name of Interviewer: \_\_\_\_\_

District where respondent Lives: \_\_\_\_\_

**DEMOGRAPHICS:**

|                                                                                                                             |                                                                                                                                                                                                 |
|-----------------------------------------------------------------------------------------------------------------------------|-------------------------------------------------------------------------------------------------------------------------------------------------------------------------------------------------|
| 1. What is your current age in years?                                                                                       | Age in <input type="text"/> <input type="text"/><br>Completed Years                                                                                                                             |
| 2. How would you rate your health today on a scale from 1-5 with 1 being excellent health and 5 being the very poor health? | <input type="checkbox"/> Excellent (1)<br><input type="checkbox"/> Very good (2)<br><input type="checkbox"/> Good (3)<br><input type="checkbox"/> Fair (4)<br><input type="checkbox"/> Poor (5) |
| 3. Now I'd like to ask about your relationships. Are you currently in a sexual relationship?                                | <input type="checkbox"/> Yes (1)<br><input type="checkbox"/> No (0)<br><b>If NO, skip to QUALITATIVE</b>                                                                                        |
| 4. Does your partner know <u>your</u> HIV status?                                                                           | <input type="checkbox"/> Yes (1)<br><input type="checkbox"/> No (0)                                                                                                                             |



|                                                     |  |
|-----------------------------------------------------|--|
| 5. How many times have you tested for HIV?          |  |
| 6. When was the first time you tested HIV-positive? |  |

### Open- Ended Questions

*Note: The in-depth interview will be open-ended and guided by the respondent's answers. This outline reflects a general guide for the in-depth interviews.*

*The interviews are meant to help us understand barriers and facilitators to ART initiation. We are also interested in their thoughts on new interventions we are developing to help men start ART. The following questions are meant to guide interviewers. Actual questions asked during the interview will vary based on participant responses.*

SCRIPT: Now I'd like to talk to you about your experience with HIV services.

### HIV TESTING

1. Think about when you used an HIV self-test kit (show the kit). When did you use it?
2. How did you feel after receiving the HIV positive status?
3. Can you talk to me about what happened after you tested HIV positive? Walk me through it so I can see the picture in detail?.
  - a. Did you talk to anyone about it?
  - b. Has your HIV status changed your daily activities at all? (Your schedule/routine)
  - c. Has your HIV status impacted your relationships? How?
  - d. Have you disclosed your status to anyone besides your partner? Why/why not

### INTERVENTION

1. After you tested positive, we approached you to be a part of our study. Since you were enrolled in the study (ie in the last 3 months), can you walk me through what has happened related to HIV health services?
  - a. Probe: What kinds of interactions have you had with expert clients or health personelle (phone call, SMS, in-person visits, home based ART).
  - b. What was the frequency of these interactions (weekly, every other week, monthly)

### ART INITIATION

2. Since you have been enrolled in the study, have you initiated ART?

#### INITIATED

3. How long did it take you to initiate ART? (several weeks, several months?). Where did you initiate?
  - a. Why did you initiate ART so quickly/slowly?
4. Since you initiated treatment, have you continued to take you medication?

- 1  
2  
3 a. Have you returned to the clinic for another refill of ART? Have there been challenges to  
4 staying on treatment – how have you overcome them?  
5

6 **NOT INITIATED**

- 7  
8 1) Since you tested HIV-positive, have you been to a health facility?  
9 a) When did you attend? (year)  
10 b) Why did you attend? (guardian vs client; HIV vs OPD)  
11 c) Why did you not initiate ART during this visit?  
12

13 **ART UPTAKE**

- 14  
15 2) We know starting ART is difficult. What do you think is most the most difficult thing about starting  
16 ART?  
17 a) PROBE: Think about your male friends. What do you think they would say is the most difficult  
18 part about starting ART for men in your village?  
19

20 **INITIATED ART**

- 21 1) How has taking ART affected your daily activities at all? (your schedule/routine) In bad ways? In  
22 good ways?  
23 2) How has taking ART affected your relationships? In bad ways? In good ways?  
24 3) Does being on ART change if you are able to hide/keep your HIV status from other people/ If you are  
25 able to hide/keep your status other people, does that make it easier to be on ART? How?  
26

27 **NOT INITIATED ART**

- 28 1) How do you think taking ART would affect your daily activities at all? (your schedule/routine) In bad  
29 ways? In good ways?  
30 2) How do you think taking ART would affect your relationships? In bad ways? In good ways?  
31 3) Would being able to hide/keep your HIV status from other people make it easier for you to be on  
32 ART? How?  
33  
34 4) What do you think is most the SECOND most difficult thing about starting ART?  
35  
36 a) PROBE: Think about your male friends. What do you think they would say is the SECOND most  
37 difficult part about starting ART for men in your village?  
38  
39  
40

41 **SUGGESTIONS FOR ART SERVICES**

42 Thank you for all the information. We would like to develop ART services that meet the needs of men in  
43 your community. We understand that men are busy and may face different challenges than women. I  
44 would like to know your opinion about what is needed in order to make ART services easy to use for men  
45 in your community  
46

- 47  
48 1) Could you describe the ideal way ART services would be given to you? If the clinic could do anything  
49 a) When would you want to pick up ART?  
50 b) Probe: day of week, time of day?  
51 c) Why do you say this?  
52 2) Where would you want to pick up ART?  
53 a) Clinic near you, clinic far from you, somewhere in the community (WHERE SPECIFICALLY), at  
54 your home?  
55 b) Why do you say this?  
56  
57  
58  
59  
60

I would like to learn about how you felt about each of the interactions we talked about earlier (remind participant of what they mentioned – ex: phone calls, texts, in person visits, home based ART)

- 1) What did you like about them?
  - a) Why? (ex: individual follow-up, sense of support, not having to travel to the clinic for homebased ART)
- 2) What did you dislike about them? What were challenges?
  - a) Why? (ex: difficulty maintaining privacy with contact or visits, doesn't want to start ART for other reasons)
- 3) Do you feel like these things helped encourage you to seek health services?
  - a) If YES, why?
  - b) If NO, why?
- 4) Do you think these things would help other men in your community if they were to test positive for HIV?

#### INITIATED

- 1) Do you feel that these things helped to encourage you to initiate and stay on ART?
- 2) Do you think you would have started treatment without them?

#### NOT INITIATED

- 1) Why do you think these things failed to help you start/stay on treatment?
  - a) Why?
- 2) If you could change anything about these interactions that you have listed, what would you change?
  - a) Probe: Type of contact, frequency of contact, personelle, location, topics covered
- 3) We understand that everyone is different. Beyond what you have experienced, do you still have problems related to seeking health services for HIV? (i.e. are there still things that you need?)
  - a) What are these unmet needs?
  - b) What do you feel would be the best solution to meet those needs?
- 4) Are there any other ideas/services we should think about doing beside the ones we just talked about (appointment reminders, in-depth counseling, community/home ART)?
  - a) What is it?
  - b) Why do you think this could work?
- 5) Is there anything else that you would like to add as we are towards the end of the interview?

**STOP THE RECORDER AND MAKE SURE RECORDING IS SAVED.**

**THANK YOU FOR YOUR PARTICIPATION IN THIS INTERVIEW. LET ME ENCOURAGE YOU THAT ARVS CAN HELP YOU LIVE LONG AND HEALTHY.**

*The following general education messages should be conveyed to all male and female participants:*

- All people who have been tested HIV positive should start ART as soon as possible for their own health and to prevent passing the virus on to others.

- 1  
2  
3  
4  
5  
6  
7  
8  
9  
10  
11  
12  
13  
14  
15  
16  
17  
18  
19  
20  
21
- Serious diseases can occur even in patients with high CD4 count (>500), without any previous symptoms. Immediate ART greatly reduces this risk.
  - People that start ART and continue lifelong without interruptions can remain healthy and live as long as people without HIV.
  - Even though you may not feel sick, ART is still important to keep you healthy for the rest of your life.
  - ART reduces the amount of virus in your body and therefore can reduce the chance that HIV is passed to your sex partners.
  - Current ART regimens are easy to take and rarely cause serious side-effects. Some people have side effects in the first few weeks of treatment and these almost always go away. IF there are persistent side effects, an alternative HIV regimen can be given.

22  
23  
24  
25  
26  
27  
28  
29  
30  
31  
32  
33  
34  
35  
36  
37  
38  
39  
40  
41  
42  
43  
44  
45  
46  
47  
48  
49  
50  
51  
52  
53  
54  
55  
56  
57  
58  
59  
60

*Be careful not to give any specific medical advice but rather refer respondents back to the clinic to speak to a provider.*

**IN-DEPTH INTERVIEW GUIDE**  
**Identifying efficient linkages strategies for HIVST (IDEaL)**  
 Male (Chichewa)

**BEGIN RECORDING**

Original Study ID: \_\_\_\_\_

Repeat Original Study ID: \_\_\_\_\_

State if male or female respondent \_\_\_\_\_

Health Facility: \_\_\_\_\_

Date of Interview: \_\_\_\_\_

Full Name of Interviewer: \_\_\_\_\_

District where respondent Lives: \_\_\_\_\_

|                                                                                                                                                                     |                                                                                                                                                                                                                                                       |
|---------------------------------------------------------------------------------------------------------------------------------------------------------------------|-------------------------------------------------------------------------------------------------------------------------------------------------------------------------------------------------------------------------------------------------------|
| 1. Kodi pakadali pano muli ndi zaka zingati zakubadwa?                                                                                                              |                                                                                                                                                                                                                                                       |
| 2. Kodi thanzi lanu mungati lilibwanji lero pa mlingo wa 1 mpaka 5, pamene 1 akuyimira thanzi labwino kwambiri ndi 5 akuyimira kuti thanzi lanu silili bwino konse? | <input type="checkbox"/> Lili bwino kwambiri (1)<br><input type="checkbox"/> Lilibwino (2)<br><input type="checkbox"/> Pakati mpakati (3)<br><input type="checkbox"/> Silili bwino (4)<br><input type="checkbox"/> Silili bwino ngakhale pang'ono (5) |
| 3. Pano ndimafuna ndikufunsemi za maubwenzi. Kodi pakadali pano muli pa ubwenzi ogonana?                                                                            | <input type="checkbox"/> Eya (1)<br><input type="checkbox"/> Ayi (0)<br><b>If NO, skip to QUALITATIVE</b>                                                                                                                                             |
| 4. Kodi bwenzi lanu limadziwa kuti mthupi mwanu muli bwanji kumbali ya HIV?                                                                                         |                                                                                                                                                                                                                                                       |

|                                                                                               |  |
|-----------------------------------------------------------------------------------------------|--|
| 5. Mwayezetsa kokwana kangati HIV?                                                            |  |
| 6. Kodi ulendo oyamba omwe mudayezetsa ndi kukupezani ndi kachilombo ka HIV ndi liti? (chaka) |  |

Pano ndimafuna ndikufunsemi mafunso okhudzana ndi zomwe mwakumana nazo zokhudza ndi thandizo la HIV.

## HIV TESTING

- 1) Ganizirani nthawi yomwe mudagwiritsa ntchito kachipangizo kodziyezera wekha HIV (awonetseni), kodi liti mudagwiritsa kachipangizoka?
- 2) Kodi munamva bwanji mutaona kuti zikuonetsa kuti muli ndi kachilombo ka HIV?
- 3) Mungandifotokozele zomwe zinachitika mutayezetsa ndikupezeka ndi HIV? Mugafofokoze mwatsatanetsatane kuti ndione chithunzithunzi cha momwe zinalili?
  - a) Munalankhula ndi aliyense?
  - b) Kodi kudziwa kuti muli ndi kachilombo ka HIV kunasintha ntchito zanu za tsiku ndi tsiku?
  - c) Kodi kudziwa kuti muli ndi kachilombo ka HIV kunakhudza maubwenzi anu? Motani?
  - d) Kodi munayamba mwauzapo za momwe mthupi mwanu mulili kupatula kwa okondedwa anu? Chifukwa chani?

## INTERVENTION

- 1) Chifukwa choti munapezeka ndi HIV, tinakupezani kuti mutenge nawo mbali mu study yathu. Poti munatenga nawo mbali mu study (miyezi itatu yapitayi), mungandifotokozere zomwe zakhala zikuchitika zokhudza ndi thandizo la HIV?
  - a) Mwakhala ndi mikumano yotani ndi omwe ali kale pa ma ARV kapena a zaumoyo (pa lamyam, uthenga wa lamyam yam'manja, kuyankhulana pamaso, kupita nokha kukakumana nawo, kulandira thandizo la ma ARV pakhomo).
  - b) Kodi mikumanoyi imachitika pafupipafupi bwanji?

## ART INITIATION

- 1) Chiloweleni mu study, mwayamba kulandira ma ARV?

### OYAMBA MANKHWALA

- 2) Kodi zinatenga nthawi yaitali bwanji musanayambe kumwa mankhwala a ARV? (masabata angapo, miyezi ingapo?) Kodi mukanayambira kuti? Kodi munayamba kumwa mankhwala mnsanga/mochedwa chifukwa chani?
- 3) Chiyambileni kulandira thandizo la ARV, kodi mukupitiliza kumwa mankhwala anu?
  - a) Mwapitako ulend wina kuchipatala kukalandira mankhwala ena a ma ARV? Mwakhala mukukumana ndi zovuta zina chifukwa chokumwa mankhwala ama ARV, kodi mavutowa mwawathetsa bwanji?

OSAYAMBA MANKHWALA

- 4) Mutayezetsa nkupezeka ndi kachilombo ka HIV, munayamba mwapitapo ku chipatala?
  - a) Munapita liti? (chaka)
  - b) Munapita chifukwa chani? (kuperekeza odwala wina kapena munadwala?; munapitila HIV kapena ku OPD)
  - c) Kodi simunayambe kumwa mankhwala a ma ARV nthawi imeneyi chifukwa chani?

**ART UPTAKTE**

- 1) Tikudziwa kuti kuyamba kumwa mankhwala a ARV kumavutirapo. Kodi mukuona kuti chovuta chachikulu pa kuyamba kumwa mankhwala ndi chani?
  - a) *Ganizirani anzanu aamuna mmudzi mwanu. Kodi mukuona kuti iwo angatchule chani ngati chovuta chachikulu pa kuyamba kumwa mankhwala a ART?*

OYAMBA MANKHWALA

- 2) Kodi kumwa mankhwala kwakhudza bwanji ntchito zanu za tsiku ndi tsiku? Mu njira yabwino kapena yobwerera mmbuyo?
- 3) Kodi kumwa mankhwala kwakhudza bwanji maubwenzi anu? Mu njira yabwino kapena yobwerera mmbuyo?
- 4) Kodi kumwa mankhwala a ARV kumaphweka mukabisa momwe mthupi mulili kwa anthu ena? Motani?

OSAYAMBA MANKHWALA

- 5) Kodi mukuganiza kuti kumwa ma ARV kungakhudze bwanji ntchito zanu za tsiku ndi tsiku? Mu njira yabwino kapena yobwerera mmbuyo?
- 6) Kodi mukuganiza kuti kumwa mankhwala a ma ARV kungakhudze bwanji maubwenzi anu? Mu njira yabwino kapena yobwerera mmbuyo?
- 7) Kodi kumwa mankhwala a ARV kungaphweke/kumaphweka kuti mukabisa momwe mthupi mulili kwa anthu ena? Motani?
- 8) Kodi chinthu chachiwiri chovuta kwambiri pa kuyamba kumwa mankhwala ndi chani?
  - a) Ganizirani amuna ena a mmudzi mwanu. Kodi mukuganiza kuti anganene kuti chovuta CHACHIWIRI pa kuyamba kumwa a ma ARV ndi chani mmudzi mwanu?

**SUGGESTIONS FOR ART SERVICES**

Zikomo chifukwa cha mayankho anu. Timafuna titakhazikitsa ndondomeko zokomera amuna mu dera lanu zokhudza thandizo la ma ARV. Tikumvetsetsa kuti amuna amakhala otangwanidwa ndipo amakumana ndi mavuto osiyana ndi amayi. Ndimafuna ndimve maganizo anu pa zofunika kuti tikonze bwino thandizoli maka kwa amuna mu dera lino.

- 1  
2  
3  
4  
5 1) Kodi mungandiuzeke njira yabwino kwambiri yomwe mukuganiza kuti thandizo la ma ARV  
6 lingamaperekedwere kwa inu, chipatala chitati chichitepo kanthu....  
7 a) Kodi mungafune mudzipita nthawi zotani ku chipatala kukatenga mankhwala?  
8 i) Tsiku la mu sabata, nthawi?  
9 ii) Ndi chifukwa chani?  
10 b) Kodi ndi malo ati omwe mungakonde kumakatengerako ARV?  
11 i) Pa chipatala cha pafupi nanu, kutali nanu, kwina mu dela lino (MALO ATI KWENIKWENI)  
12 pakhomo panu  
13 ii) Ndi chifukwa chani?  
14  
15 2) Ndimafuna ndinve za momwe mukunvera za kucheza konse tinali nako poyamba(Kumbutsani otenga  
16 nawo mbali zomwe anatchula-kuyimbilidwa lamya, uthenga wa pa lamya, kupitako okha, thandizo la  
17 pakhomo la ARV)  
18 a) Chomwe munakondapo chinali chani?  
19 i) Chifukwa?(Kuyendeledwa, kunva kuthandizidwa, osafunika kupita ku chipatala kukalandira  
20 ma AR olandilira pakhomo)  
21 b) Chomwe simunaonde ndi chani? Zovuta zinali chani?  
22 i) Chifukwa? (chitsanzo: kuvutika kusunga chinsinsi ndi owadziwa kapena  
23 mikumano,simukufuna kuyamba kumwa ma ARV pazifukwa zina)  
24 c) Mukuganiza kuti zinthu zimennezi zakulimbikitsani kupeza thandizo la zaumoyo?  
25 i) Ngati eya , chifukwa?  
26 ii) Ngati ayi, chifukwa chani?  
27 d) Kodi mukuona ngati zinthu zimenezi zingathandize anthu ena mu dela lanu ngati angakhale ndi  
28 HIV?  
29  
30  
31  
32  
33  
34

### OYAMBA MANKHWALA

- 35  
36  
37 1) Kodi mukuona ngati zinthu zimenezi zinakuthandizani kulimbikitsika kuti muyambe komanso  
38 kupitiliza kumwa mankhwala a ma ARV?  
39 a) Kodi mukuganiza kuti mukanatha kuyamba thandizo la ma ARV popanda zimenezi?  
40  
41

### OSAYAMBA MANKHWALA

- 42  
43  
44 1) Kodi mukuganiza kuti zinthu zimenezi zinalephra kukuthandizani kuyamba/kukhala mankhwala a  
45 ma ARV?  
46 a) Chifukwa?  
47  
48 2) Ngati mungathe kusintha chilichonse cha mikumano yomwe mwatchula,chingakhale chani?  
49 a) Mtundu wa mkumano, muligo wa mkumano, muthu, malo,mitu yokambilana  
50  
51 3) Tikunvetsa kuti anthu ndife osiyana. Kuposa zomwe mwakumana nazo, pakadali pano  
52 mukukumanabe ndi mavuto okhudzana ndi kupeza thandizo la zaumoyo la HIV? (pali zinthu zina  
53 zomwe mumafunabe?)  
54 a) Ndi zinthu ziti?  
55 b) Mukuganiza kuti ndi njira yanji yabwino yothandiza kupeza zofunikazi?  
56  
57  
58  
59  
60



- 1  
2  
3 4) Kodi pali maganizo ena omwe mukuona kuti angathandizepo kupatula omwe tachulawa  
4 (kukumbutsana, uphungu wapadera, kugawa mankhwala kumudzi) ndi chani? Mukuona kuti  
5 maganizo anuwa angatheke chifukwa chani?  
6  
7 5) Apa tikufunakumaliza kucheza kwathu, pali china chiwinjezera chomwe mungalankhulepo pa zomwe  
8 takambirana?  
9

10  
11 **STOP THE RECORDER AND MAKE SURE RECORDING IS SAVED.**  
12

13  
14  
15 ZIKOMO CHIFUKWA CHOTENGA NAWO MBALI MU KAFUKUFUKUYU. NDIMAFUNA  
16 NDIKULIMBIKITSANI KUTI MA ARV AKHOZA KUTHANDIZA INU KUKHALA MOYO  
17 WAUTALI NDINSO WATHANZI.  
18

19 *The following general education messages should be conveyed to all male and female participants:*  
20

- 21  
22 • Anthu onse omwe ayezetsa ndi kupezeka ndi kachilombo ka HIV akuyenera kuyamba kumwa  
23 mankhwala a ma ARV mwamsangamsanga kuti zipundulire thanzi lawo komanso apewe  
24 kupatsira ena kachilombo.  
25  
26 • Matenda oopsa akhoza kugwira munthu ngakhale amene chiwerengero cha asilikali a mnthupi ndi  
27 ochuluka (kuposera 500) posaonetsa zizindikiro zoyamba. Mankhwala a ma ARV amachepetsa  
28 chiopsezochi.  
29  
30 • Anthu omwe ayamba kumwa ma ARV ndipo akupitiliza moyo wawo onse osalekalekeza akhoza  
31 kukhala moyo wa thanzi ndi wautali chimodzimodzi anthu omwe alibe kachilombo ka HIV.  
32  
33 • Ngakhale simukumva kudwala, mankhwala a ARV ndi ofunikirabe kuti mukhale ndi thanzi moyo  
34 wanu onse.  
35  
36 • Makhwala a ma ARV amachepetsa mlingo wa tidzilombo mthupi mwanu kotero amachepetsa  
37 chiposezo chopatsira kachilombo kwa ena.  
38  
39 • Mankhwala omwe alipo pakadali pano a ma ARV ndiosavuta kumwa komanso sakhala ndi  
40 mavuto ambiri. Anthu ena amakhala ndi mavuto obwera kamba komwa mankhwala masabata  
41 oyambirira koma izi zimatha. Ngati zikupitilirabe pali mtundu wina wa mankhwala omwe akhoza  
42 kukupatsani.  
43  
44  
45  
46  
47

48 *Be careful not to give any specific medical advice but rather refer respondents back to the clinic to*  
49 *speak to a provider.*  
50  
51  
52  
53  
54  
55  
56  
57  
58  
59  
60

## 14.12. APPENDIX L: Personel CV's

**Kathryn L. Dovel**

Department of Medicine, Division of Infectious Diseases  
kdovel@mednet.ucla.edu

Email:

David Geffen School of Medicine at UCLA

Office: +1 (310) 825-7225

10833 Le Conte Ave 37-121 CHS

Fax: +1 (310) 825-3632

Los Angeles, CA 90095

**POSITIONS HELD**

- 2017- Adjunct Assistant Professor, Division of Infectious Disease  
Department of Medicine, David Geffen School of Medicine - UCLA
- 2017- Research Director - Partners in Hope  
Lilongwe, Malawi
- 2016-17 Postdoctoral Fellow in Global HIV Prevention Research  
David Geffen School of Medicine - UCLA, 2016
- 2012-15 International Programs Director - 31Bits International  
Gulu, Uganda

**EDUCATION**

- PhD Health and Behavioral Sciences - University of Colorado Denver, 2016  
*Outstanding CLAS Ph.D. Student for the University of Colorado Denver*  
*Outstanding Dissertation Award for the University of Colorado Denver*  
Dissertation: "Shifting Focus from Individuals to Institutions: The Role of Gendered Health Institutions on Men's use of HIV Services"
- MPH Community Health Sciences - UCLA, 2010  
*Certificate in Global Health*
- BA Sociology & Anthropology (dual major), minor in Biology - Vanguard University, 2007  
*Magna Cum Laude*

**HONORS AND AWARDS**

- 2019 5th place in the 2019 Department of Medicine Research Day poster competition, Department of Medicine, University of California Los Angeles
- 2019 Invited panelist, IAS 2019, Sticky and durable linkage: Latest evidence and new strategies
- 2019 Panel Chair, IAS Pre-Conference 2019, Men and HIV: What we know and what we don't know
- 2019 Top 5 abstracts at CROI, 2019

- 1  
2  
3 2019 Invited participant, Technical Consultation on HIV Linkage, International AIDS Society  
4  
5 2019 Invited participant, Differentiated Service Delivery Think Tank, Gates Foundation  
6  
7 2018 Joep Lange Award (best abstract at INTEREST, 2018)  
8  
9 2018 Female Global Scholar, The Women in Global Health Research Initiative (Weill Cornell  
10 Medicine, Cornell University)  
11  
12 2016 Outstanding Dissertation Award (UCDenver)  
13  
14 2016 Outstanding CLAS Ph.D. Student (UCDenver)  
15  
16 2012-16 Deans Travel Grant (UCDenver)  
17  
18 2007 Delta Kappa Honor Society (Vanguard University)  
19  
20 2007 Alpha Kappa Delta Honor Society (Vanguard University)  
21  
22 2007 Lambda Alpha Honor Society (Vanguard University)  
23  
24 2007 Anthropology Student of the Year (Vanguard University)

## EXTERNAL GRANTS

- 25 2019-2023 Principle Investigator, Bill and Melinda Gates Foundation. (001423) “Identifying Effective  
26 Linkage Strategies for HIVST (IDEaL)”  
27  
28 2019-2024 Principle Investigator, Fogarty International Center. International Research Scientist  
29 Development Award (K01), K01TW011484. “Innovative strategies to increase ART  
30 Initiation and viral suppression among HIV+ men in Malawi”.  
31  
32 2019-2020 Principle Investigator, Clinton Health Access Foundation. “The impact of facility HIV self-test  
33 scale up in Malawi: a mixed methods study”  
34  
35 2018-2021 Co-Investigator, The Conrad N. Hilton Foundation. Delivery of childhood development services  
36 as part of HIV treatment services in Malawi. Project implemented by UCLA and Partners in  
37 Hope.  
38  
39 2017-19 Principal Investigator, USAID. **Use of HIV self-test kits to increase identification of HIV-**  
40 **infected individuals and their partners: a Cluster Randomized Control Trial.** (sub-study  
41 within a large PEPFAR-USAID grant; PI: Risa Hoffman).  
42  
43 2017-19 Principle Investigator, Clinical Research Scholar, National Institutes of Health Loan  
44 Repayment Program.  
45  
46 2016-18 Co-Principle Investigator, USAID. Test and Start: Tracking Uptake and Retention in Care using  
47 Standard Registry Data. (sub-study within a large PEPFAR-USAID grant; PI: Risa Hoffman).  
48  
49 2015 Principal Investigator, 31Bits International. “Evaluating the impact of a couple’s livelihoods  
50 program on power dynamics and economic attainment among couples in northern Uganda.”  
51 Project implemented by 31Bits International.  
52  
53 2014-16 Principal Investigator, NIMH National Research Service Award Predoctoral Individual  
54 Fellowship, F31-MH103078-01A1, “Gender Disparities in High-Risk PITC: The Role of  
55 Policy on Provider Practices”, Impact Score: 14; Percentile: 2.0  
56  
57 2013-16 Principal Investigator, Stop AIDS Now!. “Evaluation of the ‘Quality HIV and reproductive  
58 maternal and neonatal health services for women and young women in Africa through good  
59  
60

clinical governance and community-driven accountability”’. Project implemented by the Clinton Health Access Initiative.

## INTERNAL GRANTS

- 2016-18 Principal Investigator, UCLA Center for AIDS Research Seed Grant, University of California Los Angeles, “The Gendered Dynamics of ART Uptake and Retention under Universal Treatment Policies. Examining trends and ART barriers in Central Malawi”
- 2014 Principal Investigator, Calvin L Wilson Scholarship, University of Colorado Denver, “Gender and the provision of HIV testing: Examining how models of care influence men’s use of testing services in southern Malawi”
- 2013-15 Principal Investigator, Dissertation Grant, University of Colorado Denver, “Gender Disparities in High-Risk PITC: The Role of Policy on Provider Practices”
- 2013-14 Principal Investigator, Robinson Durst Scholarship, University of Colorado Denver, “Gender disparities in high-risk PITC: Exploring the influence of feminized policy on provider practices in Malawi”
- 2009 Principal Investigator, Drabkin and Bixby International Scholarship, UCLA, “Evaluating barriers and facilitators of a nutrition program in the Bateyes of Dominican Republic”
- 2009 Principal Investigator, Global Health Grant, UCLA, “Evaluating a Nutrition Program in the Bateyes of Dominican Republic”

## PUBLICATIONS

\* represents MPH, PhD or medical students I mentored

- 2020 Cornell, Morna, Katherine Horton, Christopher Colvin, Andrew Medina-Marino, **Kathryn Dovel**. Raising the profile of men’s health: the role of the research community: Letter to the editor. *Lancet*. Ahead of Print.
- 2020 **Dovel, Kathryn**, Mike Nyirenda, Frackson Shaba\*, O. Agatha Offorjebe\*, Kelvin Balakasi, Brooke Nichols, Khumbo Phiri\*, Khumbo Ngona, Sundeep K Gupta, Risa Hoffman. “Facility-based HIV self-testing for outpatients dramatically increases HIV testing in Malawi: a cluster randomized trial.” *Lancet Global Health*. Ahead of print
- 2020 **Dovel, Kathryn**, Khumbo Phii, Misheck Mphande, Deborah Mindry, Esnart Sanudi, McDaphton Bellos, Risa Hoffman. Optimizing Test and Treat in Malawi: Health care worker perspectives on barriers and facilitators to ART initiation among healthy clients. *Global Health Action*. Ahead of Print.
- 2020 Hubbard, Julie, Khumbo Phiri\*, Corrina Moucheraud, Kaitlyn McBride, Ashley Bardon, Kelvin Balakasi, Eric Lungu, **Kathryn Dovel**, Gift Kakwesa, Risa Hoffman. A qualitative assessment of provider and client experiences with three- and six-month dispensing of antiretroviral therapy in Malawi. *Global Health: Science and Practice*. Ahead of Print.

- 1  
2  
3 2020 Hoffman, Risa M, Kelvin Balakasi, Ashley Bardon, Zumbé Siwale, Julie Hubbard, Gift  
4 Kakwesa, Mwiza Haambokoma, Thoko Kalua, Pedro Pisa, Crispin Moyo, **Kathryn Dovel**,  
5 Thembi Xulu, Ian Sanne, Matt Fox, Sydney Rosen. Eligibility for differentiated models of  
6 HIV treatment service delivery: an estimate from Malawi and Zambia. *AIDS*. 1;34(3):475-  
7 9.
- 8  
9  
10 2019 McBride, Kaitlyn, Julie Parent, Kondwani Mmanga, Mackenzie Chivwala, Mike H.  
11 Nyirenda, Alan Schooley, James B. Mwambene, **Kathryn Dovel**, Eric Lungu,  
12 Kelvin Balakasi, Risa M. Hoffman, Corrina Moucheraud. "ART Adherence Among  
13 Malawian Youth Enrolled in Teen Clubs: A Retrospective Chart Review." *AIDS*  
14 *Behav.* (2019): 1-5.
- 15  
16  
17 2019 Frackson Shaba\*, Ogechukwu Offorjebe\*, Phiri Khumbo, Lungu Eric, Kalande Pericles,  
18 Nyirenda Mike, Hoffman M Risa, Gupta Sundeep, **Dovel Kathryn**. Perceived  
19 Acceptability of a Facility-Based HIV Self-Test Intervention in Outpatient Waiting Spaces  
20 Among Adult Outpatients in Malawi: A Formative Study. *JAIDS*. 1;81(3):e92-4.
- 21  
22 2019 Magaço Amílcar, **Dovel Kathryn**, Cataldo Fabian, Nhassengo Pedroso, Nuera Lucas,  
23 Tique José, Saide Mohamed, Couto Aleny, Mbofana Francisco, Gudo E Eduardo, Cuco  
24 Rosa Marlene, Chicumbe Sérgio. "Good health as a barrier and facilitator to ART  
25 initiation: a qualitative study in the era of Test and Treat in Mozambique." *Cult Health Sex*.  
26 *11:1-5*.
- 27  
28 2018 Cornell M, **Dovel K**. Reaching key adolescent populations. *Cur Opinion HIV AIDS*.  
29 *1;13(3):274-80*.
- 30  
31 2018 Sara, Yeatman, Stephanie Chamberlin\*, **Kathryn Dovel**. Women's (health) work: A  
32 population-based, cross-sectional study of gender differences in time spent seeking health  
33 care in Malawi. *PLoS ONE*. 13(12): e0209586
- 34  
35 2018 Nhassengo, Pedroso Fabian Cataldo, Amílcar Magaço, Risa Hoffman, Lucas Nuera, José  
36 Tique, Mohamed Saide, Aleny Couto, Francisco Mbofana, Eduardo Gudo, Rosa Marlene  
37 Cuco, Sérgio Chicumbe, **Kathryn Dovel**. "Barriers and facilitators to the uptake of  
38 universal treatment in Mozambique: a qualitative study on patient and provider  
39 perceptions." *PLoS ONE*. 13(12): e0205919
- 40  
41 2018 Hubbard, Julie, Gift Kakwesa, Mike Nyirenda, James Mwambeneb, Ashley Bardona,  
42 Kelvin Balakasi, **Kathryn Dovel**, Thokozani Kaluac, Risa Hoffman. Towards the third 90:  
43 improving viral load testing with a simple quality improvement program in health facilities  
44 in Malawi. *International Public Health*. Ahead of print.
- 45  
46 2018 **Dovel, Kathryn**, Frackson Shaba\*, Ogechukwu Offorjebe\*, Kelvin Balakasi, Khumbo  
47 Phiri\*, Brooke Nichols, Chi-Hong Tseng, Ashley Bardon, Khumbo Ngona, Risa Hoffman.  
48 "Evaluating the integration of HIV self-testing into low-resource health systems: study  
49 protocol for a cluster randomized trial from EQUIP Innovations" *Trials*. 19:498.
- 50  
51 2018 Moucheraud, Corrina, Dennis Chasweka, Mike Nyirenda, Alan Schooley, **Kathryn Dovel**,  
52 Risa Hoffman. "A simple screening tool may help identify high-risk children for targeted  
53 HIV testing in Malawian inpatient wards." *JAIDS*. 79:352-7.
- 54  
55 2018 Cornell Morna, **Dovel Kathryn**. "Reaching key adolescent populations." *Current opinion*
- 56  
57  
58  
59  
60

in *HIV and AIDS*. 13(3):274-80.

- 2016 **Dovel, Kathryn**, Sara Yeatman, Joep Vanosterhout, Adrienne Chan, Alfred Matengeni, Megan Landes, Richard Bedell, and Sumeet Sodhi. "Trends in ART Initiation among Men and Non-Pregnant/Non-Breastfeeding Women before and after Option B+ in Southern Malawi." *PLoS ONE*. (12): e0165025.
- 2016 Poulin, Michelle, **Kathryn Dovel** and Susan Watkins. "Men with money and the 'vulnerable women' client category in an AIDS epidemic." *World Development*. 85; 16-30.
- 2016 **Dovel, Kathryn**, Susan Watkins, Sara Yeatman, and Michelle Poulin. "Prioritizing strategies to reduce AIDS-related mortality for men in sub-Saharan Africa: Author's reply." *AIDS*. 30(1); 158-9.
- 2015 **Dovel, Kathryn**, Sara Yeatman, Susan Watkins, and Michelle Poulin. "Men's heightened risk of AIDS-related death: the legacy of gendered HIV testing and treatment strategies." *AIDS*. 29; 1123-5.
- 2015 **Dovel, Kathryn** and Kallie Thomson. "Financial obligations and economic barriers to antiretroviral therapy experienced by HIV positive women participating in a job-creation program in northern Uganda." *Culture, Health, and Sexuality*. 18(6).
- 2015 Krueger, Patrick, **Kathryn Dovel** and Justin Denney. "Democracy and self-rated health across 67 countries: A multilevel analysis." *Social Science and Medicine*. 143; 137-44.
- 2013 Conroy, Amy, Sara Yeatman and **Kathryn Dovel**. "The social construction of HIV/AIDS during a time of evolving access to antiretroviral therapy in rural Malawi." *Culture, Health and Sexuality*. 15(8); 924-37.
- 2012 Yeatman, Sara, **Kathryn Dovel**, Amy Conroy and Hazel Namadingo. "The predictors of HIV treatment optimism and its relationship with sexual risk behavior among a population-based sample of young adults in southern Malawi." *AIDS Care*. 25(8);1018-25.

## TECHNICAL MANUSCRIPTS

- 2019 Hopkins, John, Laura Pascoe, Dean Peacock and Kathryn Dovel. "Accelerating Men's HIV service delivery and uptake in Eastern and Southern Africa UNAIDS Literature Review, Eastern and Southern Africa Regional Focus." UNAIDS, Johannesburg, South Africa.
- 2018 Masina, Tobias, **Kathryn Dovel**, Reuben Mwenda on behalf of the Malawi Ministry of Health. "National Guidelines for HIV self-testing." Malawi Ministry of Health Lilongwe Malawi.
- 2017 Pascoe, Laura, Dean Peacock and **Kathryn Dovel**. "To Get to Zero, We Must Also Get to Men – UNAIDS Literature Review, Eastern and Southern Africa Regional Focus." UNAIDS, Geneva.
- 2016 Macharia, Faith, Job Akuno, Faith Wanji, Julius Nguku, **Kathryn Dovel**, Caroline Ngare, Fred Nyagah, and Daniel Mwisunji. "National Guidelines for Male Engagement in HIV Services." Kenya Ministry of Health. Nairobi, Kenya.
- 2016 **Kathryn Dovel**, James Mkandawire, Susan Watkins, Nancy Mulauzi and Sydney Rodney Lungu. "Evaluation of the Good Clinical Governance Project: improving HIV and reproductive health services in Lilongwe, Malawi." Stop AIDS Now!. Lilongwe, Malawi.



## OTHER PUBLICATIONS

- 2019 Kathryn Dovel, Stephanie Chamberlin, Sara, Yeatman. Malawi's Health System Puts Women First. This Isn't Always a Good Thing. *The Conversation: Africa*. Published February 19, 2019. Found at <https://theconversation.com/malawis-health-system-puts-women-first-this-isnt-always-a-good-thing-111277>
- 2016 **Dovel, Kathryn**, Sara Yeatman, and Susan Watkins. **Dying from a treatable disease: HIV and the men we neglect.** *Huffington Post*. Published February 23, 2016. Found at [http://www.huffingtonpost.com/the-conversation-africa/dying-from-a-treatable-di\\_b\\_9295620.html](http://www.huffingtonpost.com/the-conversation-africa/dying-from-a-treatable-di_b_9295620.html)

## WORK IN PREPARATION

- Dovel, Kathryn**. "The gendered organization of HIV services and men's poor use of testing in southern Malawi: consequences of hegemonic masculinity within health institutions." (Revise & Resubmit, JIAS)
- Offorjebe , Ogechukwu\*, Frackson Shaba\*, Kelvin Balakasi, Mike Nyrienda, Risa Hoffman, **Kathryn Dovel**. "Partner-delivered HIV self-testing increases the perceived acceptability of index partner testing among HIV-positive clients in Malawi." (Revise & Resubmit, PLoS ONE)
- Dovel, Kathryn**, Kelvin Balakasi, Khumbo Phiri\*, Frackson Shaba\*, O. Agatha Offorjebe\*, Sundeep K Gupta, Vincent Wong, Eric Lungu, Brooke Nichols, Mike Nyirenda, Ngona K, Anteneh Worku, Risa Hoffman. "A randomized trial on index HIV self-testing for sexual partners of ART clients in Malawi." (Under Review)
- Nichols, Brooke; Offorjebe, O. Agatha; Cele, Refiloe; Shaba , Frackson ; Balakasi, Kelvin; Chivwara, Mackenzie; Hoffman, Risa; Long, Lawrence; Rosen, Sydney; **Dovel, Kathryn**. "Economic evaluation of facility-based HIV self-testing among adult outpatients in Malawi." (Under Review)
- Dovel, Kathryn**, Gladies Orobmi, Melanie Beagly\*, Kallie Thomson. "Including men without sidelining women: the feasibility of male involvement within resource-strained gender equality programs in sub Saharan Africa." (Under Review)
- Dovel, Kathryn** and Kallie Thomson. "Evaluating the impact of a couple's livelihoods program on power dynamics and economic attainment among couples in northern Uganda." (In preparation)
- Dovel, Kathryn**. "Men in global HIV policy: examining discourses of blame and vulnerability." (In preparation)

## SELECT PEER-REVIEWED PRESENTATIONS

- 2020 Moucheraud, Corrina, Samuel W. Lewis, Misheck Mphande, Ben Allan Banda, Hitler Sigauke, Paul Kawale, Aubrey Dkangoma, **Kathryn Dovel**, Alemayehu Amberbir, Agnes Moses, Sundeep Gupta, Risa M. Hoffman. Cervical cancer knowledge and attitudes among HIV-positive men in Malawi." Paper accepted for poster presentation. Conference on Retroviruses and Opportunistic Infections (CROI). Boston, Massachusetts, USA
- 2019 **Dovel, Kathryn**, Kelvin Balakasi, Khumbo Phiri\*, Frackson Shaba\*, O. Agatha Offorjebe\*, Sundeep K Gupta, Vincent Wong, Eric Lungu, Brooke Nichols, Mike Nyirenda, Ngona K, Anteneh Worku, Risa Hoffman. Index HIV self-testing among male partners in Malawi:

- 1  
2  
3 predictors of self-testing within a randomized controlled trial”. Paper accepted for poster  
4 presentation. International AIDS Society. Mexico City, Mexico  
5
- 6 2019 **Dovel Kathryn**, Salem Ejigu, Pericles Kalande, Evelyn Udedi, Chipawiru Mbalanga, Lauri  
7 Bruns, Thomas Coates. “Beyond the Caregiver: Diffusion of early childhood development  
8 knowledge and practices within the social networks of HIV-positive mothers in Malawi”.  
9 Paper accepted for poster discussion. International AIDS Society. Mexico City, Mexico  
10
- 11 2019 **Dovel, Kathryn**, Kelvin Balakasi, Khumbo Phiri\*, Frackson Shaba\*, O. Agatha Offorjebe\*,  
12 Sundeep K Gupta, Vincent Wong, Eric Lungu, Brooke Nichols, Mike Nyirenda, Ngona K,  
13 Anteneh Worku, Risa Hoffman. A randomized trial on index HIV self-testing for sexual  
14 partners of ART clients in Malawi.” Paper accepted for oral presentation. Conference on  
15 Retroviruses and Opportunistic Infections (CROI). Seattle, Washington, USA  
16
- 17 2019 Ogechukwu Offorjebe, **Kathryn Dovel**, Frackson Shaba, Kelvin Balakasi, Risa Hoffman,  
18 Sydney Rosen, Brooke Nichols, for the EQUIP Health team. Cost-effectiveness and national  
19 impact of index HIV self-testing in Malawi. Paper accepted for poster presentation.  
20 Conference on Retroviruses and Opportunistic Infections (CROI). Seattle, Washington, USA  
21
- 22 2018 **Dovel, Kathryn**, Mike Nyirenda, Frackson Shaba\*, Ogechukwu Offorjebe\*, Kelvin Balakasi,  
23 Brooke Nichols, Khumbo Phiri\*, Khumbo Ngona, Alan Schooley, Risa Hoffman on behalf of  
24 EQUIP Innovation for Health. “Facility-based HIV self-testing for outpatients dramatically  
25 increases HIV testing in Malawi: a cluster randomized trial.” Paper accepted for oral  
26 presentation. International AIDS Society. Amsterdam, Netherlands  
27
- 28 2018 Shaba, Frackson\*, Kelvin Balakasi, Ogechukwu Offorjebe\*, Mike Nyirenda, Risa Hoffman,  
29 **Kathryn Dovel** on behalf of EQUIP Innovation for Health. “Facility-based HIV self-testing in  
30 Malawi: an assessment of characteristics and concerns among clients who opt-out of testing.”  
31 Paper accepted for poster presentation. International AIDS Society. Amsterdam, Netherlands  
32
- 33 2018 **Dovel, Kathryn**, Mike Nyirenda, Frackson Shaba, Ogechukwu Offorjebe\*, Kelvin Balakasi,  
34 Brooke Nichols, Khumbo Phiri\*, Khumbo Ngona, Alan Schooley, Risa Hoffman on behalf of  
35 EQUIP Innovation for Health. “Facility-based HIV self-testing for outpatients dramatically  
36 increases HIV testing in Malawi: a cluster randomized trial.” Paper accepted for oral  
37 presentation. INTEREST. Kigali, Rwanda - awarded the Joep Lange INTEREST award  
38
- 39 2018 Offorjebe , Ogechukwu\*, Frackson Shaba, Kelvin Balakasi, Mike Nyrienda, Risa Hoffman,  
40 **Kathryn Dovel** on behalf of EQUIP Innovation for Health. “Partner-delivered HIV self-  
41 testing increases the perceived acceptability of index partner testing among HIV-positive  
42 clients in Malawi.” Paper accepted for mini-oral presentation. INTEREST. Kigali, Rwanda  
43
- 44 2018 Stephanie Chamberlin\*, Misheck Mphande, Pericles Kalande, **Kathryn Dovel** on behalf of  
45 EQUIP Innovation for Health. “Barriers and facilitators to consistent engagement in HIV care  
46 under Test and Treat in Malawi.” Paper accepted for poster presentation. INTEREST. Kigali,  
47 Rwanda  
48
- 49 2017 **Dovel Kathryn**, Khumbo Phiri\*, Alan Schooley, Misheck Mphande, Mackenzie Chivwara,  
50 Risa Hoffman. “Facility-level barriers to antiretroviral therapy experienced by men in  
51 Malawi.” Paper accepted for poster presentation. International AIDS Society. Paris, France  
52
- 53 2017 Misheck Mphande, Khumbo Phiri\*, Mackenzie Chivwara, Mike Nyirenda, Alan Schooley,  
54 Rachel Thomas, Risa Hoffman, **Kathryn Dovel**. “Examining Malawi’s Rollout of Universal  
55 Treatment: Policy Implementation and Provider Perceptions.” Paper accepted for poster  
56 presentation. International AIDS Society. Paris, France  
57  
58  
59  
60



- 1  
2  
3 2016 **Dovel, Kathryn.** “Factors influencing the implementation of provider-initiated testing and  
4 counseling (PITC) among STI clients in southern Malawi: A mixed methods study.” Paper  
5 accepted for poster presentation. International AIDS Society. Durbin, South Africa  
6  
7  
8 2016 Westerhof, Nienke, Dzowela M, **Kathryn Dovel**, E. Banda, J. Chikonda. “Community-driven  
9 accountability through advocacy committees: a vehicle for improving HIV and reproductive  
10 health services for women living with HIV.” Paper accepted for poster presentation.  
11 International AIDS Society. Durbin, South Africa  
12  
13 2016 **Dovel, Kathryn**, Patrick Krueger, Shari Dworkin. “Predictors of men’s use of HIV testing  
14 services in low-income countries: the role of masculinity.” Paper accepted for poster  
15 presentation. Population Association of America. Washington D.C.  
16  
17 2014 **Dovel, Kathryn.** “Gender in HIV Policy: Examining how gender shapes the dissemination of  
18 HIV policies in southern Malawi.” Paper accepted for roundtable presentation. American  
19 Public Health Association. New Orleans.  
20  
21 2014 **Dovel, Kathryn.** “Gendered care: examining how clinic experiences influence HIV testing  
22 decisions among STI patients in southern Malawi.” Paper accepted for oral presentation.  
23 National Women’s Studies Association, San Juan, Puerto Rico.  
24  
25 2013 **Dovel, Kathryn.** “HIV policies and their influence on men's use of care.” Paper accepted for oral  
26 presentation. International HIV Social Science and Humanities Conference, Paris, France.  
27  
28 2007 **Dovel, Kathryn.** “Social and structural impediments that limit proper healthcare in rural southern  
29 Kurdistan.” Paper accepted for oral presentation. The Anthropology and Sociology Research  
30 Conference, Santa Clara, CA.  
31

### 32 INVITED PRESENTATIONS

- 33 2019 “Index HIV Self-Testing in Malawi”. World Health Organization webinar  
34  
35 2019 “Men’s (lack of) access to the health system”. UNAIDS. Regional meeting on Accelerating  
36 Men’s HIV service delivery and uptake in Eastern and Southern Africa.  
37  
38 2019 “Index HIVST in Malawi: a Randomized Control Trial. World Health Organization. Webinar  
39  
40 2019 “*Reaching men and engaging them in HIV care – lessons from Malawi*”. Men and HIV forum.  
41 International AIDS Society. Mexico City, Mexico  
42  
43 2018 “The impact of HIV self-testing on HIV testing among outpatients in high burden facilities in  
44 Malawi: preliminary findings from a cluster randomized control trial” USAID Washington.  
45 Washington D.C  
46  
47 2017 “Who benefits from Test and Treat? Understanding gender dimensions of universal treatment  
48 policies and gender-specific barriers to care” Malawi Ministry of Health, HIV Treatment  
49 Technical Working Group. Lilongwe, Malawi.  
50  
51 2016 “Facility-based barriers to HIV testing among men in Malawi: a systems approach” Malawi  
52 Ministry of Health, HIV Treatment Technical Working Group. Lilongwe, Malawi.  
53  
54 2015 “Men’s heightened risk of AIDS-related death: the legacy of gendered HIV testing and  
55 treatment strategies” United Nations Meeting on Male Engagement. Geneva, Switzerland  
56  
57 2015 “Facility-based barriers to men’s use of HIV testing: recommendations for male engagement  
58 guidelines.” National AIDS Control Council Meeting for the Development of the Male  
59  
60

Engagement Guidelines. Nairobi, Kenya

- 2014 “Gendered care: examining who ‘does gender’ in clinical settings and its influence on HIV services for men in southern Malawi.” Health Working Group, UCLA. Los Angeles, CA
- 2013 “From questions to methods: mixed methods approach to disparities research.” Course in Qualitative Methods (Doctoral Students). University of Colorado Denver. Denver, C
- 2010 “Lost in translation: examples of why best-practice nutrition programs fail in rural Dominican Republic.” Drabkin and Bixby International Conference, UCLA. Los Angeles, CA

## RELEVANT EMPLOYMENT ACTIVITIES

- 2015- Consultant for Mixed Methods, Invest in Knowledge, Zomba, Malawi  
Activities: Oversaw data analysis and write-up for studies implemented by Invest in Knowledge. I focused on qualitative and mixed methods analysis and write-up.
- 2009-10 Research Specialist, Korean Resource Center, Los Angeles, CA  
Activities: Managed data entry and data cleaning and led in data analysis and write-up of a study assessing use of non-communicable disease services among first- and second-generation Korean populations in Los Angeles.
- 2009 Program Evaluation Fellow, Bataye Relief Alliance, Santo Domingo, Dominican Republic  
Activities: Led the assessment of a nutritional program aimed to improve child health outcomes in Haitian populated bateyes in Dominican Republic. I led tool development, training enumerators, data analysis, and write-up
- 2007-08 Program Coordinator, Orange County Department of Public Health, Santa Ana, CA  
Activities: Conducted literature reviews and assisting in the development of interventions to address Alcohol and Drug abuse among young adults in Orange County. Assisted in the protocol development and implementation of interventions.

## SERVICE

- 2019 Committee Member of the Men’s HIV Forum at the International AIDS Conference, Mexico City
- 2018- Member of the Malawi Ministry of Health HIV Self-Testing Guidelines Task Force
- 2017- Member of the Malawi Ministry of Health HIV Testing Services Technical Working Group
- 2017- Member of the EQUIP HIV Self-Testing Technical Working Group
- 2016- Member of the UNAIDS Working Group “Engaging men in solutions for the HIV epidemic: Health systems.”
- 2016- Member of the “Men and HIV Global Working Group”
- 2016 Reviewer for the APHA 2016 Annual Meeting & Expo
- 2012-13 Editor of the Health and Behavioral Sciences Peer-Reviewed Journal, University of Colorado, Denver
- 2011-12 Student Advisory Council Member, University of Colorado, Denver

**COURSES TAUGHT****Adjunct Professor**

Social determinants of health in the context of HIV services in sub-Saharan Africa – Field Rotation Series (UCLA)

Health, Disease & Globalization: Foundations of Epidemiology (Vanguard University)

Human Sexuality (co-taught, Vanguard University)

Cultural Anthropology (Vanguard University)

Applied Anthropology (Vanguard University)

Qualitative Methods (Vanguard University)

**Teaching Assistant**

AIDS and Other Sexually Transmitted Diseases (UCLA)

Global Health Issues (UCLA)

Social Determinants of Health (University of Colorado Denver)

Statistical Analysis (University of Colorado Denver)

**MENTORSHIP**

University of California Los Angeles. David Geffen School of Medicine. Medical Student. Kate Coursey. “Examining characteristics of women who engage in an integrated Early Childhood Development and PMTCT program in Malawi: endline evaluation.” 2019-

University of California Los Angeles. David Geffen School of Medicine. Medical Student. “Provider acceptability of interventions to increase ART initiation among men who test HIV-positive through index HIV self-testing.” 2019-

University of California Los Angeles. David Geffen School of Medicine. Medical Student. Tijana Temelkowska. “Examining the successes and challenges of implementing an early childhood development intervention with HIV-positive women in Malawi: a process evaluation.” 2018-

University of California Los Angeles. Internal Medicine Residency, Global Health Track. Resident Physician. Marguerite Thorp. “Can a brief screening tool identify ART clients at risk of defaulting from treatment? a prospective study in Malawi.” 2018-

University of California Los Angeles. Internal Medicine Residency, Global Health Track. Resident Physician. Adrian Mayo. “Predictors of early ART retention among adults who initiated under Universal Treatment policies in Malawi.” 2018-

University of Colorado Denver. Health and Behavioral Sciences. Doctoral Student. Stephanie Chamberlin. “Exploring the association between education and ART retention in rural Malawi.” 2017-

University of California Los Angeles. Fogarty GloCal Fellow. Medical Student. Ogechukwu Offorjebe. “Examining the feasibility and acceptability of HIV self-test kits for index testing among HIV+ clients and their partners in Malawi: A mixed methods study.” 2017-18

College of Medicine, Malawi. MPH Student. Khumbo Phiri. “The role of lay cadre in ART initiation and retention under Test and Treat in Malawi.” 2017-18

1  
2  
3 Brandeis University. Elisa Morales, Becca Sliwosk, and Melanie Morris (capstone project). “Developing a  
4 funding proposal for Men-to-Men, a gender-transformation and income-generating program for men in  
5 northern Uganda.” 2015 (with 31Bits International)  
6  
7

8 Vanguard University. Medical Anthropology Honors Thesis. Joanna Takegami. “Barriers to Women’s use of  
9 Antiretroviral Therapy in Northern Uganda: Exploring the Role of Structural Violence.” 2011  
10  
11

## 12 **AD HOC REVIEWER**

13  
14 AIDS, JAIDS, JIAS, BMC Public Health, Global Health Action, Culture, Health and Sexuality  
15  
16

## 17 **PROFESSIONAL MEMBERSHIPS**

18 Member, American Public Health Association (APHA), Present

19 Member, American Sociology Association (ASA), Present

20 Member, American Anthropological Association (AAA), Present  
21  
22  
23  
24  
25  
26  
27  
28  
29  
30  
31  
32  
33  
34  
35  
36  
37  
38  
39  
40  
41  
42  
43  
44  
45  
46  
47  
48  
49  
50  
51  
52  
53  
54  
55  
56  
57  
58  
59  
60

OMB No. 0925-0001 and 0925-0002 (Rev. 10/15 Approved Through 10/31/2018)

**THOMAS J. COATES**

eRA COMMONS USER NAME (credential, e.g., agency login): TCOATS

POSITION TITLE: **Professor Emeritus, Division of Infectious Diseases, Department of Medicine  
UCLA David Geffen School of Medicine**EDUCATION/TRAINING (*Begin with baccalaureate or other initial professional education, such as nursing, include postdoctoral training and residency training if applicable. Add/delete rows as necessary.*)

| INSTITUTION AND LOCATION                        | DEGREE<br>(if applicable) | Completion Date<br>MM/YYYY<br>Y | FIELD OF STUDY           |
|-------------------------------------------------|---------------------------|---------------------------------|--------------------------|
| San Luis Rey College, San Luis Rey, California  | BA                        | 06/1968                         | Philosophy               |
| San Jose State University, San Jose, California | MA                        | 01/1971                         | Psychology               |
| Stanford University, Stanford, California       | PhD                       | 06/1977                         | Counseling<br>Psychology |

**A. Personal Statement**

I am Director of the system-wide University of California Global Health Institute (founded in 2008) and was the Founding Director of the UCLA Center for World Health (founded in 2012) until 2018. In 1986 I co-founded the Center for AIDS Prevention Studies (CAPS) at UCSF and directed it from 1991 to 2003. I was also the founding Director of the UCSF AIDS Research Institute, leading it from 1996 to 2003.

I have substantial expertise in research on HIV prevention among heterosexual men and women in the HIV epidemic in sub-Saharan Africa and in the HIV testing and treatment trials in sub-Saharan Africa, especially Malawi through PEPFAR funding. As Distinguished Research Professor of Medicine, I continue with two NIH and two foundation grants focused in southern Africa. I also continue as a co-investigator on the UCLA-based Center for HIV Identification, Prevention and Treatment Studies (CHIPTS).

I have had extensive experience with large-scale, community-based, multi-site research and implementation projects spanning HIV prevention, care and treatment, and policy. I currently have funding to test and evaluate innovative strategies for bring men in South Africa into HIV testing and treatment, as well as for providing early childhood development training for HIV-infected mothers and their babies in Malawi through support from the Conrad N. Hilton Foundation. We are also in the first year of a 5-year NIH-funded grant to study pre-exposure prophylaxis for pregnant and post-partum women in South Africa.

**B. Positions and Honors**

|    |                |                                                                                                                                                                   |
|----|----------------|-------------------------------------------------------------------------------------------------------------------------------------------------------------------|
| 1  |                |                                                                                                                                                                   |
| 2  |                |                                                                                                                                                                   |
| 3  | 1984 - 2003    | Member, Medical Attending Staff, UCSF Hospitals and Clinics                                                                                                       |
| 4  |                |                                                                                                                                                                   |
| 5  | 1990 - 2003    | Professor, Department of Medicine, UCSF                                                                                                                           |
| 6  |                |                                                                                                                                                                   |
| 7  | 1991 - 2003    | Director, Center for AIDS Prevention Studies, UCSF                                                                                                                |
| 8  |                |                                                                                                                                                                   |
| 9  | 1996 - 2003    | Director, AIDS Research Institute, UCSF                                                                                                                           |
| 10 | 2000           | Elected to the Institute of Medicine (now the National Academy of Medicine)                                                                                       |
| 11 | 2010 - 2014    | Member, Institute of Medicine Board on Global Health                                                                                                              |
| 12 |                |                                                                                                                                                                   |
| 13 | 2003 - 2006    | Professor Step VII, Division of Infectious Diseases, Department of Medicine, David Geffen School of Medicine, UCLA                                                |
| 14 |                |                                                                                                                                                                   |
| 15 | 2003 - Present | Joint Appointment, Department of Medicine, UCSF; Member, Executive Committee, UCLA AIDS Institute                                                                 |
| 16 |                |                                                                                                                                                                   |
| 17 |                |                                                                                                                                                                   |
| 18 | 2003 - 2011    | Director, UCLA Program in Global Health                                                                                                                           |
| 19 |                |                                                                                                                                                                   |
| 20 | 2004 - Present | Joint Appointment, Department of Epidemiology, UCLA School of Public Health                                                                                       |
| 21 |                |                                                                                                                                                                   |
| 22 | 2006 – 2009    | Professor Step IX, Division of Infectious Diseases, Department of Medicine, David Geffen School of Medicine, UCLA                                                 |
| 23 |                |                                                                                                                                                                   |
| 24 | 2006 - 2018    | Michael & Sue Steinberg Endowed Professor of Global AIDS Research, Division of Infectious Diseases, Department of Medicine, David Geffen School of Medicine, UCLA |
| 25 |                |                                                                                                                                                                   |
| 26 |                |                                                                                                                                                                   |
| 27 | 2006 - 2018    | Director, Global Capacity Building Core Center for HIV Identification, Prevention, and Treatment Services, UCLA Semel Neurosciences Institute                     |
| 28 |                |                                                                                                                                                                   |
| 29 |                |                                                                                                                                                                   |
| 30 | 2006 - 2018    | Associate Director for International and Policy Research UCLA AIDS Institute                                                                                      |
| 31 |                |                                                                                                                                                                   |
| 32 | 2009 - 2016    | Co-director, University of California Global Health Institute                                                                                                     |
| 33 |                |                                                                                                                                                                   |
| 34 | 2009 –2018     | Distinguished Professor, Division of Infectious Diseases, Department of Medicine, David Geffen School of Medicine, University of California, Los Angeles          |
| 35 |                |                                                                                                                                                                   |
| 36 | 2011 – 2018    | Director, UCLA Center for World Health at the David Geffen School of Medicine and UCLA Health                                                                     |
| 37 |                |                                                                                                                                                                   |
| 38 | 2016-Present   | Director, University of California Global Health Institute                                                                                                        |
| 39 |                |                                                                                                                                                                   |
| 40 | 2018-Present   | Distinguished Research Professor, Division of Infectious Diseases, UCLA David Geffen School of Medicine                                                           |
| 41 |                |                                                                                                                                                                   |

#### C. Contribution to Science

1. **Combination HIV Prevention including Pre-Exposure Prophylaxis:** I have written extensively and conducted research on combination HIV prevention for MSM in the United States and Latin America and with a variety of populations in sub-Saharan Africa. My writing and research have been influential in shaping thinking about combination prevention, and in demonstrating the importance of considering HIV prevention as a combination of factors, as opposed to any single kind of program.

Joseph Davey D, Bekker LG, Gorbach P, **Coates T**, Myer L. Delivering PrEP to pregnant and breastfeeding women in sub-Saharan africa: The implementation science frontier. AIDS. 2017 Jul 18. doi: 10.1097/QAD.0000000000001604. PubMed PMID: 28723709.



Richter L, Komárek A, Desmond C, Celentano D, Morin S, Sweat M, Chariyalertsak S, Chingono A, Gray G, Mbwambo J, **Coates T**; Reported physical and sexual abuse in childhood and adult HIV risk behaviour in three African countries: findings from Project Accept (HPTN-043). *AIDS and behavior*. 2014; 18(2):381-9. PMID: PMC3796176

**Coates TJ**; An expanded behavioral paradigm for prevention and treatment of HIV-1 infection. *Journal of acquired immune deficiency syndromes (1999)*. 2013; 63 Suppl 2:S179-82. PMID: PMC3943341

**Coates TJ**, Richter L, Caceres C. Behavioural strategies to reduce HIV transmission: how to make them work better. *Lancet*. 2008; 372(9639):669-84. PMID: PMC2702246

2. **HIV Counseling and Testing (HTC):** I have conducted many significant and influential studies in HTC, beginning first with observational studies of the effect of HTC on risk behavior among men who have sex with men (MSM) in San Francisco. I was Principal Investigator for the first randomized controlled trial of HTC in Eastern Africa and the Caribbean, examining the effect of HTC on individual males and females, as well as couples presenting for HTC in Kenya, Tanzania, and Trinidad and Tobago, and these results were reported in *The Lancet* in 2000. I was the Principal Investigator for Project Accept, a cluster randomized trial conducted in South Africa, Zimbabwe, Tanzania, and Thailand, and these results were reported in *Lancet Global Health* in 2015. I also was the Principal Investigator of a randomized trial at Mulago Hospital in Uganda examining the effect of short vs. elaborated counseling on males and females presenting for care, and these results were reported in *Lancet Global Health* in 2014.

**Coates TJ**, Kulich M, Celentano DD, Zelaya CE, Chariyalertsak S, Chingono A, Gray G, Mbwambo JK, Morin SF, Richter L, Sweat M, van Rooyen H, McGrath N, Fiamma A, Laeyendecker O, Piwowar-Manning E, Szekeres G, Donnell D, Eshleman SH; NIMH Project Accept (HPTN 043) study team; Effect of community-based voluntary counselling and testing on HIV incidence and social and behavioural outcomes (NIMH Project Accept; HPTN 043): a cluster-randomised trial. *The Lancet. Global Health*. 2014; 2(5):e267-77. PMID: PMC4131207

van Rooyen H1, McGrath N, Chirowodza A, Joseph P, Fiamma A, Gray G, Richter L, **Coates T**. Mobile VCT: reaching men and young people in urban and rural South African pilot studies (NIMH Project Accept, HPTN 043). *AIDS and behavior*. 2013; 17(9):2946-53. PMID: PMC3597746

Wanyenze RK, Kanya MR, Fatch R, Mayanja-Kizza H, Baveewo S, Szekeres G, Bangsberg DR, **Coates T**, Hahn JA; Abbreviated HIV counselling and testing and enhanced referral to care in Uganda: a factorial randomised controlled trial. *The Lancet. Global Health*. 2013; 1(3):e137-45. PMID: PMC4129546

Mhlongo S, Dietrich J, Otjombe KN, Robertson G, **Coates TJ**, Gray G. Factors associated with not testing for HIV and consistent condom use among men in Soweto, South Africa. *PloS one*. 2013; 8(5):e62637. PMID: PMC3656000

3. **Global Health:** I have contributed to the literature on global health, especially from the perspective of engaging multiple disciplinary perspectives to attend to a variety of global health issues around the world.

Debas HT, **Coates TJ**; The University of California Global Health Institute opportunities and challenges. Infectious disease clinics of North America. 2011; 25(3):499-509, vii. PubMed [journal]PMID: 21896355

Duber HC, **Coates TJ**, Szekeres G, Kaji AH, Lewis RJ; Is there an association between PEPFAR funding and improvement in national health indicators in Africa? A retrospective study. Journal of the International AIDS Society. 2010; 13:21. PMCID: PMC2895577

Maman S, Abler L, Parker L, Lane T, Chirowodza A, Ntongwisangu J, Srirak N, Modiba P, Murima O, Fritz K.A comparison of HIV stigma and discrimination in five international sites: the influence of care and treatment resources in high prevalence settings. Social science & medicine (1982). 2009; 68(12):2271-8. PMCID: PMC2696587

Collins C, Coates TJ, Szekeres G; Accountability in the global response to HIV: measuring progress, driving change. AIDS (London, England). 2008; 22 Suppl 2:S105-111. PMCID: PMC2879260

#### **Complete List of Published Work in MyBibliography:**

<http://www.ncbi.nlm.nih.gov/sites/myncbi/thomas.coates.1/bibliography/40839346/public/?sort=date&direction=descending>

D. Research Support

#### **Ongoing Research Support**

R01MH105534-01A1 (Coates) 07/07/15 – 04/30/20

NIH/NIMH

#### **Bringing South African Men into HIV Counseling and Testing (HCT) and Care**

The objective of this project is to provide evidence-based strategies to improve treatment of HIV+ men through a three-step process: (1) Testing a significant proportion of the population, (2) linkage to care, and (3) maintaining in care a significant proportion of HIV+ individuals to the point of viral suppression. My role is as the Principal Investigator.

UM1 AI068619 (El Sadr) 07/01/14 – 11/30/20

Family Health International

NIH-NIAID

#### **HIV Prevention Trials Network (HPTN) Leadership Group**

The goals of this project are: 1) to develop the HPTN research agenda; 2) to review SWG research plans; 3) to review and approve concept plans; 4) to oversee the discretionary fund; 5) to review and revise HPTN policies and procedures; and 6) to evaluate the performance of the HPTN. My role is as Chair of the Manuscript Review Committee

P30 MH058107 (Shoptaw) 03/01/2017-02/28/2022

NIMH/NIH



1  
2  
3 **Center for HIV Identification, Prevention, and Treatment Services**

4 This project is a P30 and provides center grant services to HIV investigators at UCLA. I am a Co-  
5 Investigator in this center.  
6

7  
8  
9 The Conrad N. Hilton Foundation

01/01/2018-12/31/2020

10 **Delivery of Childhood Development Services as Part of HIV Treatment Services in Malawi**

11 This grant supports the integration of early childhood development services within pre- and post-natal care  
12 for HIV+ mothers in Malawi.  
13  
14

15  
16 R01 MH116771-01A1

09/30/2018-09-29-2023

17 NIMH/NIH

18 **Evaluating the Prep-PP Cascade in HIV-negative Pregnant and Breastfeeding Women in South**  
19 **Africa.**

20 The goal of this project is to test innovative models for delivering PrEP to pregnant and breastfeeding  
21 women age 16 and above in South Africa.  
22

23 **Entertainment Industry Foundation-Charlize Theron Africa Outreach Project** 06/01/2018-  
24 05/30/2021

25 The goal of this project is to create a Youth Leaders Scholarship Fund to support promising young South  
26 Africans to attend South African tertiary education institutions.  
27

28 Bill and Melinda Gates Foundation (Dovel)  
29 12/3/2023

12/4/2019-

30 **Identifying Effective Linkage Strategies for HIVST (IDEaL)**

31 This grant tests the effect of a staged intervention for ART initiation among men in Malawi, whereby  
32 additional interventions are added each month for individuals who have not yet initiated ART.  
33

34 **Completed Research Support**

35 20150025 (Coates)

09/01/15 – 08/31/17

36 Conrad N. Hilton Foundation

37 **Delivery of Early Childhood Development Services as a Part of HIV Treatment Services in Malawi**

38 Pilot grant to assess the feasibility and acceptability, as well as initial outcomes, of supporting Option B+  
39 mothers in Malawi to increase their responsiveness to their children and have positive impacts on early  
40 childhood development (ECD).  
41

42 P30 MH58107 (Rotheram-Borus)

02/01/07 - 01/31/17

43 NIH/NIMH

44 **Center for HIV Identification, Prevention, and Treatment Services (CHIPTS)**

45 The mission of the Center for HIV Identification, Prevention, and Treatment Services (CHIPTS) is to  
46 promote collaborative research and education on effective HIV detection, prevention, and treatment  
47 programs for HIV at the societal, community, provider, and individual levels. My role is as the Director  
48 for International Care.  
49  
50  
51  
52  
53  
54  
55  
56  
57  
58  
59  
60

1  
2  
3  
4  
5  
6  
7  
8  
9  
10  
11  
12  
13  
14  
15  
16  
17  
18  
19  
20  
21  
22  
23  
24  
25  
26  
27  
28  
29  
30  
31  
32  
33  
34  
35  
36  
37  
38  
39  
40  
41  
42  
43  
44  
45  
46  
47  
48  
49  
50  
51  
52  
53  
54  
55  
56  
57  
58  
59  
60

For peer review only

# RISA MICHELLE HOFFMAN

## CURRICULUM VITAE

### PERSONAL HISTORY

David Geffen School of Medicine at UCLA  
 Division of Infectious Diseases  
 10833 Le Conte Ave 37-121 CHS  
 Los Angeles, CA 90095  
 rhoffman@mednet.ucla.edu  
 Tele: (310) 825-7225  
 Fax: (310) 825-3632

### EDUCATION

Stanford University 1994, BA  
 University of California Los Angeles 2000, MD  
 Harvard School of Public Health 2000, MPH  
 Internship 2000-2001: Harvard Combined Medicine/Pediatrics Residency Program  
 Residency 2001-2004: Harvard Combined Medicine/Pediatrics Residency Program  
 Fellowship Infectious Diseases: 2005-2008: University of California, Los Angeles

### LICENSURE

California, A85173, 01/31/2021

### BOARD CERTIFICATION/OTHER CERTIFICATION

2004 & 2014 American Board of Internal Medicine  
 2007 & 2017 American Board of Internal Medicine, Infectious Diseases  
 2005 Certification in Travel Medicine from the London School of Hygiene and Tropical Medicine

### PROFESSIONAL EXPERIENCE

#### *Present Position*

|              |                                                                                                             |
|--------------|-------------------------------------------------------------------------------------------------------------|
| 2016-present | Associate Clinical Professor, Division of Infectious Diseases, UCLA                                         |
| 2010-2016    | Assistant Clinical Professor, Division of Infectious Diseases, UCLA Medical Center, Los Angeles, California |
| 2008-2010    | Clinical Instructor, Division of Infectious Diseases, UCLA Medical Center, Los Angeles, California          |

#### *Previous Positions*

|           |                                                                                                                      |
|-----------|----------------------------------------------------------------------------------------------------------------------|
| 2005-2008 | Fellow in Infectious Diseases, UCLA Medical Center, Los Angeles, California                                          |
| 2001-2004 | Resident Physician, Internal Medicine, Brigham and Women's Hospital, Boston, Massachusetts                           |
| 2001-2004 | Resident Physician, Pediatrics, Boston Children's Hospital and Massachusetts General Hospital, Boston, Massachusetts |
| 2000-2001 | Intern, Internal Medicine, Brigham and Women's Hospital, Boston, Massachusetts                                       |
| 2000-2001 | Intern, Pediatrics, Boston Children's Hospital and Massachusetts General Hospital, Boston, Massachusetts             |

**PROFESSIONAL ACTIVITIES & MEMBERSHIPS**

|              |                                                                                                                                                                                                                                |
|--------------|--------------------------------------------------------------------------------------------------------------------------------------------------------------------------------------------------------------------------------|
| 2018-present | Interim Director, Global Health Education and Research Program, David Geffen School of Medicine at UCLA                                                                                                                        |
| 2016-present | Co-Director UCLA AIDS Institute/CFAR International Health Services and Policy Research Program Section                                                                                                                         |
| 2015-present | Associate Program Director, UCLA Infectious Diseases Fellowship Training Program                                                                                                                                               |
| 2013-present | Advisory Board Member for the University of California Global Health Institute GloCal Health Fellowship                                                                                                                        |
| 2009-present | Research Co-Director, Partners in Hope Malawi and UCLA Research Collaboration                                                                                                                                                  |
| 2009-present | Investigator, AIDS Clinical Trials Group (ACTG) and Maternal Child Adolescent Network (IMPAACT)                                                                                                                                |
| 2009-present | HIV Clinical Consultant, To Help Everyone Clinic in Los Angeles, California                                                                                                                                                    |
| 2009-present | Ad hoc Peer Reviewer (AIDS Care, International Journal of STD and AIDS, BMC Women's Health, American Society of Tropical Medicine and Hygiene, Journal of Infectious Diseases, International Health, JIAS)                     |
| 2007-present | Member, Infectious Diseases Society of America (IDSA)                                                                                                                                                                          |
| 2016-2018    | Committee Member, Antiretroviral Therapy Strategies (ARTs), AIDS Clinical Trials Group                                                                                                                                         |
| 2008-2016    | Founder/Program Director, Sustainable Nutrition for Orphans and Vulnerable Children in Malawi, Central Africa: Provides education on nutrition and sustainable food sources for families caring for orphans in northern Malawi |
| 2014-2016    | Committee Lead, Infectious Diseases Quality Improvement M&M Program                                                                                                                                                            |
| 2011-2016    | Committee Member, AIDS Clinical Trials Group <i>Women's Health Inter-network Scientific Committee (WHISC)</i>                                                                                                                  |
| 2007-2013    | Founder/Program Co-Director, UCLA resident physician elective training program in Malawi, Africa                                                                                                                               |
| 2010-2013    | Co-Director, UCLA Program in Global Health and Global Health Education Program for the David Geffen School of Medicine at UCLA                                                                                                 |
| 2008-2012    | Faculty for 'Multidisciplinary Approach to Global Health' elective course for first and second year medical students at UCLA                                                                                                   |
| 2007-2012    | Committee Member, American Society of Tropical Medicine and Hygiene Education Committee                                                                                                                                        |
| 2005-2012    | Advisory Board Member, UCLA Medicine/Pediatrics Residency Training Advisory Board                                                                                                                                              |
| 2005-2011    | Interviewer, UCLA Medicine/Pediatrics Residency Training Program                                                                                                                                                               |
| 2006-2008    | Faculty Group Leader, Problem Based Learning Microbiology Block for second year medical students at UCLA                                                                                                                       |
| 2006-2008    | Creator/Organizer, UCLA Infectious Diseases Core Curriculum Program                                                                                                                                                            |

**HONORS AND AWARDS**

|      |                                                                                    |
|------|------------------------------------------------------------------------------------|
| 2012 | David Geffen School of Medicine Award for Excellence in Education                  |
| 2011 | Nomination for the Consortium of Universities for Global Health Early Career Award |
| 2009 | Nomination for UCLA Faculty Teaching Award                                         |

1  
2  
3  
4  
5  
6  
7  
8  
9  
10  
11  
12  
13  
14  
15  
16  
17  
18  
19  
20  
21  
22  
23  
24  
25  
26  
27  
28  
29  
30  
31  
32  
33  
34  
35  
36  
37  
38  
39  
40  
41  
42  
43  
44  
45  
46  
47  
48  
49  
50  
51  
52  
53  
54  
55  
56  
57  
58  
59  
60

2007 Nomination for UCLA Fellow Teaching Award  
 2006 Nomination for UCLA Fellow Teaching Award  
 2000 Elected to the UCLA chapter of the Alpha Omega Alpha Honor Society  
 2000 Janet M. Glasgow Memorial Achievement Citation for Academic Achievement at the UCLA School of Medicine  
 2000 John M. Adams Award for Excellence in Pediatrics, UCLA School of Medicine  
 2000 Edith and Carl Lasky Memorial Award for Outstanding Research Achievement, UCLA School of Medicine  
 1999 Longmire Surgical Medal for outstanding performance in surgical clerkships, awarded by the Department of Surgery, UCLA School of Medicine  
 1999 Charles Wacker Summer Research Fellowship, UCLA School of Medicine  
 1994 Elected to the Stanford Chapter of Phi Beta Kappa  
 1994 Elected to the Stanford Cap and Gown Women's Honor Society  
 1994 Recipient of the Joshua Lederberg Award for Outstanding Academic Achievement in Human Biology

#### LECTURES AND PRESENTATIONS

“Management of Febrile Neutropenia” Presented as part of the UCLA Division of Infectious Diseases Core Curriculum Program. Los Angeles, California, November 2013

“Challenges and Successes of EQUIP Malawi” Presented at UCLA Infectious Diseases Grand Rounds. Los Angeles, California, April 2014

“Primary Care Issues in HIV Care” Presented at the UCLA Department of Medicine housestaff curriculum. Los Angeles, California, May 2014

“A Case of Multi-Class HIV Resistance” Presented at the UCLA HIV/Hepatitis C Case Conference Series, Los Angeles, California, May 2014

“Evidence Based Managed of Osteomyelitis” Presented at the UCLA Division of Infectious Diseases Case Conference Series, Los Angeles, California, June 2014

“Responding to Viral Load: A Primer for Malawi Clinical Mentors” Presented at a PEPFAR EQUIP Clinical Training Meeting in Malawi, Africa, January 2015

“Clinical Pearls in the Management of HIV/AIDS”. Presented at the UCLA Internal Medicine Resident Core Curriculum Conference Series, Los Angeles, California, February 2015

“Quality Improvement in ID Care at UCLA: Lessons Learned from M&M” Presented at the UCLA Division of Infectious Diseases Core Conference Series, Los Angeles, California, April 2015

1  
2  
3  
4  
5 “Health & Safety Overseas: An orientation for medical students” Presented at the UCLA Global  
6 Health Education Medical Student Orientation Program, Los Angeles, California, April 2015  
7

8  
9 “ID Mimics”. Presented at the UCLA ID Fellow Core Curriculum Series, Los Angeles, California,  
10 May 2015  
11

12  
13 “Quality Improvement on the Infectious Diseases Service: Transition of Care.” Presented at the UCLA  
14 Division of Infectious Diseases Case Conference, Los Angeles, California, June 2015  
15

16  
17 “Quality Improvement on the Infectious Diseases Service: Notes and Documentation.” Presented at the  
18 UCLA Division of Infectious Diseases Case Conference, Los Angeles, California, December 2015  
19

20  
21 “Quality Improvement on the Infectious Diseases Service: HIV Care”. Presented at the UCLA  
22 Division of Infectious Diseases Case Conference, Los Angeles, California, February 2016  
23

24  
25 “Multi-month scripting to achieve improved outcomes in EQUIP”. Presented at the EQUIP annual  
26 meeting, Johannesburg, South Africa March 2016  
27

28  
29 “Clinical Management of HIV/AIDS for the Primary Care Resident”. Presented at the UCLA Internal  
30 Medicine Resident Core Curriculum Conference Series, Los Angeles, California, April 2016  
31

32  
33 “Update on Option B+ in Malawi”. Presented to the Women’s Health Committee of the AIDS Clinical  
34 Trials Group, Los Angeles, California, April 2016  
35

36  
37  
38 EQUIP Malawi: A Partnership for HIV Care in Malawi. Presented at Harbor UCLA Infectious  
39 Diseases Grand Rounds, Los Angeles, California, July 2016  
40

41  
42 Speaker, Infectious Diseases Career Panel for Medical Students at the David Geffen School of  
43 Medicine. Los Angeles, September 2016  
44

45  
46 Systemwide Case Conference Faculty Discussant for the MultiCampus Infectious Diseases Fellowship  
47 Program. Presented at the VA Hospital, Los Angeles, California, December 2016  
48

49  
50 “Introduction to Global HIV Treatment in Resource Poor Settings,” Lecturer for the UCLA School of  
51 Public Health, February 2018, Los Angeles  
52

53  
54 UCLA Division of Infectious Diseases, Journal Club Faculty Discussant, MDR TB Treatment, March  
55 2018, Los Angeles  
56

1  
2  
3  
4  
5 Faculty Panelist. Global Health Career Night for the David Geffen School of Medicine. November  
6 2018, Los Angeles  
7

8  
9 West LA VA Internal Medicine Grand Rounds Speaker: "The Intersection of HIV and Non-  
10 Communicable Diseases in Resource-Limited Settings" April 2019, Los Angeles  
11

12  
13 "Qualitative Client and Provider Experiences with Multi-Dispensing for HIV in Malawi and Zambia".  
14 Presented as part of the CQUIN Consortium. Webinar, April 2019  
15

16  
17 "Introduction to the Global Health Program". Presented as part of the DGSOM Global Health  
18 Selective, September 2019, Los Angeles  
19

## 20 21 PUBLICATION/BIBLIOGRAPHY

### 22 23 RESEARCH PAPERS

#### 24 25 **RESEARCH PAPERS (PEER REVIEWED)**

26  
27 **Hoffman RM**, Umeh OC, Garris C, Givens N, Currier JS. Evaluation of Sex Differences of  
28 Fosamprenavir (With and Without Ritonavir) in HIV-infected Men and Women. *HIV Clin Trials*.  
29 2007;8(6):371-380.  
30

31  
32  
33 **Hoffman RM**, AboulHosn J, Child JS, Pegues DA. Bartonella Endocarditis in Complex Congenital  
34 Heart Disease. *Congenit Heart Dis*. 2007;2(1):79-84.  
35

36  
37 Black V, **Hoffman RM**, Sugar CA, Menon P, Venter FWD, Currier JS, Rees H. Safety and Efficacy  
38 of Initiating Highly Active Antiretroviral Therapy in an Integrated Antenatal and HIV Clinic in  
39 Johannesburg, South Africa. *J Acquir Immune Defic Syndr*. 2008;49(3):276-81. PMC2893046.  
40

41  
42 **Hoffman RM**, Black V, Technau K, van der Merwe KJ, Currier JS, Coovadia A, Chersich M. Effects  
43 of Highly Active Antiretroviral Therapy Duration and Regimen on Risk for Mother-to-Child  
44 Transmission of HIV in Johannesburg, South Africa. *J Acquir Immune Defic Syndr*. 2010;54(1):35-  
45 41. PMC2880466.  
46

47  
48 Pilotto JH, Velasque L, Khalili R, Ismerio R, Veloso VG, Grinsztejn B, Morgado MG, Watts DH,  
49 Currier JS, **Hoffman RM**. Maternal Outcomes after HAART for Prevention of Mother-to-Child  
50 Transmission in HIV-infected Women in Brazil. *Antivir Ther*. 2011;16(3):349-56. PMC3437753.  
51

52  
53 Hoffman RM, Jamieson BD, Bosch RJ, Currier JS, Kitchen CMR, Schmid I, Zhu Y, Bennett K,  
54 Mitsuyasu R. Baseline Immune Phenotypes and CD4+ T Lymphocyte Responses to Antiretroviral  
55  
56  
57  
58  
59



1  
2  
3 Therapy in Younger versus Older HIV-infected Individuals. *J Clin Immunol*. 2011;31(5):873-81.  
4 PMC3194061.  
5  
6

7 Van der Merwe J, Hoffman RM, Black V, Chersich M, Coovadia A, Rees H. Birth outcomes in South  
8 African Women Receiving Highly Active Antiretroviral Therapy: a Retrospective Observational  
9 Study. *J Int AIDS Soc*. 2011;14:42. PMC3163172.  
10

11 Mindry D, Wagner G, Lake JE, Smith A, Linnemayr S, Quinn M, **Hoffman RM**. Fertility Desires  
12 Among HIV-infected Men and Women in Los Angeles County: Client Needs and Provider  
13 Perspectives; *Matern Child Health J*. 2013 May;17(4):593-600. PMC N/A.  
14

15 Burke Z, Chen J, Conceicao C, **Hoffman R**, Miller L, Taela A, DeUgarte DA. Evaluation of  
16 Preoperative and Intraoperative RBC Transfusion Practices in Maputo Central Hospital, Mozambique.  
17 Transfusion. 2013 May 21. doi: 10.1111/trf.12252. PMC3751985.  
18

19 **Hoffman RM**, Leister E, Kacanek D, Shapiro DE, Read JS, Bryson Y, Currier JS. Biomarkers from  
20 late pregnancy to six weeks postpartum in HIV-infected women who continue versus discontinue  
21 antiretroviral therapy after delivery. *JAIDS*. 2013 May 8. PMC3868443.  
22

23 Jaganath D, Mulenga C, **Hoffman R**, Hamilton J, Boneh G. This is My Story: Participatory  
24 Performance for HIV and AIDS Education at the University of Malawi. *Health Education Research*.  
25 2013 Sep 18. PMC4155417.  
26

27 Kawale P, Mindry D, Stramotas S, Chilikh P, Phoya A, Henry K, Elashoff D, Jansen P, **Hoffman R**.  
28 Factors associated with desire for children among HIV-infected women and men: A quantitative and  
29 qualitative analysis from Malawi and implications for the delivery of safer conception counseling.  
30 *AIDS Care*. 2013 Jun;26(6). PMC3943633.  
31

- 32 1. Iroezi N, Mindry D, Kawale P, Chikowi G, Jansen P, **Hoffman R**. A qualitative analysis of the  
33 barriers and facilitators to receiving care in a prevention of mother-to-child program in Nkhoma,  
34 Malawi. *Afr J Reprod Health*. 2013 Dec;17(4). PMC4361063.  
35
- 36 2. Russell E, Mohammed T, Smeaton L, Jorowe B, MacLeod I, **Hoffman R**, Currier JS, Moyo S,  
37 Essex M, Lockman S. Immune activation markers in peripartum women in Botswana: association  
38 with feeding strategy and maternal morbidity. *PLoS One*. 2014 Mar 21. PMC3962339.  
39
- 40 3. Reddy D, Njala J, Stocker P, Schooley A, Flores M, Tseng C-H, Pfaff C, Jansen P, Mitsuyasu RT,  
41 **Hoffman RM**. High-risk human papillomavirus in HIV-infected women undergoing cervical  
42 cancer screening in Lilongwe, Malawi: A pilot study. *International Journal of STDS and AIDS*,  
43 2014 Jun 13. PMC4363075.  
44
- 45 4. Kamuyango A, Hirschhorn L, Wang W, Jansen P, **Hoffman R**. One-Year Outcomes of Women  
46 Started on Antiretroviral Therapy during Pregnancy before and after the Implementation of Option  
47 B+ in Malawi: A Retrospective Chart Review from Three Facilities. *World Journal of AIDS*. 2014  
48 Sept;4(3). PMC4356991.  
49
- 50 5. Shull H, Tymchuk C, Grogan T, Hamilton J, Friedman J, **Hoffman RM**. Evaluation of the UCLA  
51 Department of Medicine Malawi Global Health Clinical Elective: Lessons from the First Five  
52 Years. *Am J Trop Med Hyg*. 2014 Sep 15. PMC4228879.  
53  
54  
55  
56  
57  
58  
59  
60



6. Hoffman JC, Anton PA, Baldwin GC, Elliott J, Anisman-Posner D, Tanner K, Grogan T, Elashoff D, Sugar C, Yang OO, **Hoffman RM**. Seminal Plasma HIV-1 RNA Concentration is Strongly Associated with Altered Levels of Seminal Plasma Interferon Gamma, Interleukin-17, and Interleukin-5. *AIDS Res Hum Retroviruses*. 2014 Oct 2. PMC4208556.
7. Menon P, **Hoffman R**, Black V. Characteristics of HIV-infected women on antiretroviral therapy who develop preeclampsia in South Africa: A Case Series. *The Journal of Global Health*. 2014;4(2). PMC N/A.
8. Cheng Q, Engelage E, Grogan T, Currier JS, and **Hoffman RM**. Who provides primary care? A cross-sectional survey of HIV patients and providers in a Los Angeles clinic. *AIDS Clinical Research*. 27 Oct 2014;5(11). PMC4409003.
9. Kawale P, Mindry D, Phoya A, Jansen P, **Hoffman RM**. Provider attitudes about childbearing and knowledge of safer conception at two HIV clinics in Malawi. *Reproductive Health*. 2015 Mar 7;12(1):17. PMC4355153.
10. Yeatman S, **Hoffman RM**, Chilungo A, Lungu S, Namadingo H, Chimwaza A, and Trinitapoli JA. Health-seeking behavior and symptoms associated with early HIV infection: Results from a population-based cohort in southern Malawi. *JAIDS*. 2015 May 1;69(1):126-30. PMC4422188.
11. **Hoffman RM**, Jaycocks A, Vardavas V, Wagner G, Lake JE, Mindry D, Currier JS, Landovitz R. Benefits of PrEP as an adjunctive method of HIV prevention during attempted conception between HIV-uninfected women and HIV-infected male partners. *Journal of Infectious Diseases, J Infect Dis*. 2015 Jun 19. PMC4621256.
12. Lake JE, **Hoffman RM**, Tseng CH, Wilhalme HM, Currier JS. Success of Standard Dose Vitamin D Supplementation in Treated HIV Infection. *Open Forum Infect Dis*. 2015 May 15;2(2). PMC4462892.
13. Chipungu C, Veltman JA, Jansen P, Chiliko P, Lossa C, Namarika D, Benner B, **Hoffman RM**, Bristow CC, Klausner JD. Feasibility and Acceptability of Cryptococcal Antigen Screening and Prevalence of Cryptocococemia in Patients Attending a Resource-limited HIV/AIDS clinic in Malawi. *Journal of the International Association of Providers of AIDS Care, J Int Assoc Provid AIDS Care*. 2015 Jul 2. PMC N/A.
14. Coelho L, Cardoso SW, Luz PM, **Hoffman RM**, Mendonca L, Veloso VG, Currier JS, Grinsztejn B, Lake JE. Vitamin D3 supplementation in HIV infection: effectiveness and associations with antiretroviral therapy. *Nutr J*. 2015 Aug 18: 14. PMC4538921.
15. **Hoffman RM**, Lake JE, Wilhame H, Tseng CH, Currier JD. Vitamin D levels and markers of inflammation and metabolism in HIV-infected individuals on suppressive antiretroviral therapy. *AIDS Res and Human Retroviruses* 2016 March;32(3). PMC4779972.
16. Herbst de Cortina S, Arora G, Wells T, **Hoffman RM**. Evaluation of a Structured Predeparture Orientation at the David Geffen School of Medicine's Global Health Education Programs. *Am J Trop Med Hyg*. 2016 Mar 2;94(3). PMC4775891.

17. Jordan J, **Hoffman R**, Arora G, Coates W. Activated learning: providing structure in global health education at the David Geffen School of Medicine at the University of California, Los Angeles – a pilot study. *BMC Medical Education*. 2016 Feb 16. PMC4755030.
18. Wagner GJ, Linnemayr S, Ghosh-Dastidar B, Currier JD, **Hoffman R**, Schneider S. Supporting Treatment Adherence Readiness through Training (START) for patients with HIV on antiretroviral therapy: a study protocol for a randomized controlled trial. *Trials*. 2016 March 24;17(1). PMC4806419.
19. Arora G, Perkins K, **Hoffman RM**. Optimizing global health electives through partnerships: A pilot study of pediatric residents. *Academic Pediatrics*. 2015 Sept-Oct;15(5). PMC N/A.
20. Chien E, Phiri K, Schooley S, Chivwala M, Hamilton J, **Hoffman RM**. Successes and Challenges of HIV Mentoring in Malawi: The Mentee Perspective. *PLoS One*. 2016 Jun 18;11(6). PMC4924818.
21. Schooley A, Kamudumuli P, Vangala S, Tseng CH, Soko C, Parent J, Phiri K, Jahn A, Namarika D, **Hoffman RM**. CD4 Variability in Malawi: Implications for Use of a CD4 Threshold of 500 Cells/mm<sup>3</sup> Versus Universal Eligibility for Antiretroviral Therapy. *Open Forum Infectious Diseases*. 2016 Aug 29;3(3). PMC5047419.
22. Hemarajata P, Baghdadi JD, **Hoffman R**, Humphries RM. *Burkholderia pseudomallei*: Challenges for the Clinical Microbiology Laboratory. *J Clin Microbiol* 2016 Dec;54(12):2866-2873. PMC5121373.
23. Pfaff C, Scott V, **Hoffman R**, Mwangomba B. You can treat my HIV – But can you treat my blood pressure? Availability of integrated HIV and non-communicable disease care in northern Malawi. *Afr J Prim Health Care Fam Med*. 2017 Feb 15;9(1):e1-e8. PMC5320467.
24. Gibb J, Chitsulo J, Chipungu C, Chivwara M, Schooley A, **Hoffman RM**. Supporting Quality Data Systems: Lessons Learned from Early Implementation of Routine Viral Load Monitoring at a Large Clinic in Lilongwe, Malawi. *Clinical Research in HIV AIDS and Prevention*. 2017 Mar 14;2(4). PMC5502771
25. Arora G and **Hoffman RM**. Development of an HIV Postexposure Prophylaxis (PEP) Protocol for Trainees Engaging in Academic Global Health Experiences. *Acad Med*. 2017 Apr 25. PMC28445222.
26. **Hoffman RM**, Phiri K, Parent J, Grotts J, Elashoff D, Kawale P, Yeatman S, Currier JS, Schooley A. Factors associated with retention in Option B+ in Malawi: a case control study. *J Int AIDS Soc*. 2017 Apr 27;20(1):1-8. PMC28453243.
27. Currier JS, Britto P, **Hoffman RM**, Brummel S, Masheto G, Joao E, Santos B, Aupibul L, Losso M, Pierre MF, Weinberg A, Gnanashanmugam D, Chakhtoura N, Klingman K, Browning R, Coletti A, Mofenson L, Shapiro D, Pilotto J. Randomized Trial of Stopping or Continuing ART among Postpartum Women with Pre-ART CD4  $\geq$  400 cells/mm<sup>3</sup> (PROMISE 1077HS). *PLoS One*. 2017 May 10;12(5):e0176009. PMC28489856.
28. **Hoffman R**, Bardon A, Rosen S, Fox M, Kalua T, Xulu T, Taylor A, Sanne I. Varying intervals of antiretroviral medication dispensing to improve outcomes for HIV patients (The INTERVAL

- Study): study protocol for a randomized controlled trial. *Trials*. 2017 Oct 13;18(1):476. PMC29029644.
29. Judson SD, LeBreton M, Fuller T, **Hoffman RM**, Njabo K, Brewer TF, Dibongue E, Diffo J, Kameni JF, Loul S, Nchinda GW, Njouom R, Nwobegahay J, Takuo JM, Torimiro JN, Wade A, Smith TB. Translating Predictions of Zoonotic Viruses for Policymakers. *Ecohealth*. 2017 Dec 11. PMC29230614.
30. Fatti G, Ngorima-Mabhena N, Chirwa F, Chirwa B, Takarinda K, Tafuma TA, Mahachi N, Chikodzore R, Nyadundu S, Ajayi CA, Mutasa-Apollo T, Mugurungi O, Mothibi E, **Hoffman RM**, Grimwood A. The effectiveness and cost-effectiveness of 3- vs. 6-monthly dispensing of antiretroviral treatment (ART) for stable HIV patients in community ART-refill groups in Zimbabwe: study protocol for a pragmatic, cluster-randomized trial. *Trials*. 2018 Jan 29;19(1):79. PMC29378662.
31. Caplan MR, Phiri K, Parent J, Phoya A, Schooley A, **Hoffman RM**. Provider Perspectives on Barriers to Reproductive Health Services for HIV-Infected Clients in Central Malawi. *Clinical Obstetrics, Gynecology and Reproductive Medicine*. 2018 Feb 12;4(1). PMC6391881.
32. Canan T, **Hoffman RM**, Schooley A, Boas Z, Schwab K, Kahn D, Shih R, Phiri K, Parent J, Banda BA, Chagoma R, Chipungu C, Pool K-L. Training Course in Focused Assessment with Sonography for HIV/TB in HIV Prevalent Medical Centers in Malawi. *Journal of Global Radiology*. 2018 March;4(1). PMC N/A.
33. Rough K, Seage GR, Williams PL, Hernandez-Diaz S, Huo Y, Chadwick EG, Currier JS, **Hoffman RM**, Barr E, Shapiro DE, Patel K; PHACS and the IMPAACT P1025 Study Teams. Birth Outcomes for Pregnant Women with HIV Using Tenofovir–Emtricitabine. *New England Journal of Medicine*. 2018 April 26;378(17):1593-1603. PMC5984044
34. Dovel K, Shaba F, Nyirenda M, Offorjebe OA, Balakasi K, Phiri K, Nichols B, Tseng C-H, Bardon A, Ngona K, **Hoffman R**. Evaluating the Integration of HIV Self-Testing Into Low-Resource Health Systems: Study Protocol for a Cluster-Randomized Control Trial from EQUIP Innovations. *Trials*. 2018 Sept 17;19(1). PMC6142354
35. Schwab K, **Hoffman RM**, Phiri L, Kahn D, Longwe L, Banda BA, Gama K, Chimombo M, Shih R, Schooley A, Pool K-L. Remote Training and Oversight of Sonography for Human Immunodeficiency Virus–Associated Tuberculosis in Malawi. *Journal of the American College of Radiology*. 2018 Sept 26. PMC6540803
36. Hubbard J, Kakwesa G, Nyirenda M, Mwambene J, Bardon A, Balakasi K, Dovel K, Kalua T, **Hoffman RM**. Towards the Third 90: Improving Viral Load Testing with a Simple Quality Improvement Program in Health Facilities in Malawi. *Int Health*. 2018 Nov 1. PMC Pending
37. Moucheraud C, Chasweka D, Nyirenda M, Schooley A, Dovel K, **Hoffman RM**. Simple Screening Tool to Help Identify High-Risk Children for Targeted HIV Testing in Malawian Inpatient Wards. *J Acquir Immune Def Syndr*. 2018 Nov 1; 79(3). PMC Pending
38. **Hoffman RM**, Brummel SS, Britto P, Pilotto JH, Masheto G, Aupibul L, Joao E, Purswani MU, Buschur S, Flore Pierre M, Coletti A, Chakhtoura N, Klingman KL, Currier JS for the 1077HS

- 1  
2  
3 PROMISE Team. Adverse Pregnancy Outcomes among Women who Conceive on Antiretroviral  
4 Therapy. *Clin Infect Dis* 2018 June 1. PMC6321847  
5
- 6  
7 39. Nhassengo P, Cataldo F, Magaco A, **Hoffman RM**, Nerua L, Saide M, Cuco R, Hoek R, Mbofana  
8 F, Couto A, Gudo E, Chicumbe S, Dovel K. Barriers and facilitators to the uptake of Test and  
9 Treat in Mozambique: a qualitative study on patient and provider perceptions. *PLOS One*. 2018  
10 Dec 26; 13(12). PMC6306230  
11
- 12 40. Magaço A, Dovel K, Cataldo F, Nhassengo P, **Hoffman RM**, Nerua L, Tique J, Saide M, Couto  
13 A, Mbofana F, Gudo E, Cuco R, Chicumbe S. 'Good health' as a barrier and facilitator to ART  
14 initiation: a qualitative study in the era of test-and-treat in Mozambique. *Culture, Health and*  
15 *Sexuality*. 2018. PMC Pending  
16
- 17 41. **Hoffman RM**, Konstantia A, Brummel S, Saidi F, Violari A, Dula D, Mave V, Fairlie L, Gerhard  
18 T, Kamateeka M, Chipato T, Chi B, Stranix-Chibanda L, Nematadzira T, Moodley D,  
19 Bhattacharya D, Gupta A, Coletti A, McIntyre JA, Klingman KL, Chakhtoura N, Shapiro DE,  
20 Folwer MG, Currier JS. Maternal health outcomes among HIV-infected breastfeeding women with  
21 high CD4 counts: results of a treatment strategy trial. *HIV Clinical Trials* 2018 Dec;19 (6).  
22 PMC6428202 [Available on 2019-12-01]  
23
- 24  
25 42. Murnane PM, Bacchetti P, Currier JS, Brummel S, Okochi H, Phung N, Louie A, Kuncze K,  
26 **Hoffman RM**, Nematadzira T, Soko DK, Owor M, Saidi F, Flynn PM, Fowler MG, Gandhi M.  
27 Tenofovir concentrations in hair strongly predict virologic suppression in breastfeeding women.  
28 *AIDS* 2019 Apr 22. [Epub ahead of print]. PMC Pending  
29
- 30  
31 43. Shaba F, Offorjebe OA, Phiri K, Lungu E, Kalande, P, Nyirenda M, Gupta S, **Hoffman RM**,  
32 Dovel K. Perceived acceptability of a facility-based HIV self-test intervention in outpatient  
33 waiting spaces among adult outpatients in Malawi: A formative study. *J Acquir Immune Defic*  
34 *Syndr*. 2019 Jul 1;81(3):e92-e94. PMC Pending  
35
- 36  
37 44. Weinberg A, Huo Y, Kacanek D, Patel K, Watts DH, Wara D, **Hoffman RM**, Klawitter J,  
38 Christians U; for IMPAACT P1025 Team. Markers of spontaneous preterm delivery in women  
39 living with HIV: relationship with protease inhibitors and Vitamin D. *J Acquir Immune Defic*  
40 *Syndr*. 2019 May 28. [Epub ahead of print]. PMC Pending  
41
- 42  
43 45. McBride K, Parent J, Mmanga K, Chivwala M, Nyirenda MH, Schooley A, Mwambene JB, Dovel  
44 K, Lungu E, Balakasi K, **Hoffman RM**, Moucheraud C. ART Adherence Among Malawian Youth  
45 Enrolled in Teen Clubs: A Retrospective Chart Review. *AIDS Behav*. 2019 July 10. PMC Pending  
46
- 47 46. Le C, Britto P, Brummel SS, **Hoffman RM**, Li JZ, Flynn PM, Taha TE, Coletti A, Fowler MG,  
48 Bosch RJ, Gandhi RT, Klingman KL, McIntyre JA, Currier JS. Time to Viral Rebound and Safety  
49 after Antiretroviral Treatment Interruption in Postpartum Women Compared to Men. *In Press*  
50 *AIDS* 2019, August 1. PMC Pending  
51  
52  
53  
54  
55  
56  
57  
58  
59  
60

OMB No. 0925-0001 and 0925-0002 (Rev. 09/17 Approved Through 03/31/2020)

**MICHAL KULICH**

eRA COMMONS USER NAME (credential, e.g., agency login):

POSITION TITLE: Associate Professor of Statistics

EDUCATION/TRAINING (*Begin with baccalaureate or other initial professional education, such as nursing, include postdoctoral training and residency training if applicable. Add/delete rows as necessary.*)

| INSTITUTION AND LOCATION                     | DEGREE<br>(if applicable) | Completion Date<br>MM/YYYY | FIELD OF STUDY   |
|----------------------------------------------|---------------------------|----------------------------|------------------|
| Charles University, Prague                   | M.S.                      | 9/1991                     | Math. Statistics |
| Limburgs Universitair Centrum,<br>Diepenbeek | M.S.                      | 9/1992                     | Biostatistics    |
| University of Washington, Seattle            | M.S.                      | 9/1995                     | Biostatistics    |
| University of Washington, Seattle            | Ph.D.                     | 10/1997                    | Biostatistics    |

**A. Personal Statement**

I have an extensive past experience with design, conduct and analysis of clinical trials, especially community randomized trials, in the context of HIV prevention research. I served as the Lead Statistician for the Behavioral Working Group within the HPTN in 2000–2003 and as the Protocol Statistician and Steering Committee member for Project ACCEPT (HPTN043) in 2003-2013. I have been also participating in protocol review groups in the HPTN. I was involved in the design of HPTN043, development of data collection procedures, and development and application of data quality control measures. I am a coauthor of 7 research papers on methodology and results of HPTN043. Since 2015, I am a protocol statistician on another community-randomized trial, Zwakala Ndoda Study: Diagnosing, Linking and Maintaining Men in Antiretroviral Treatment in Vulindlela and Greater Edendale Area, KwaZulu-Natal. The current application builds on my past experience with HIV prevention trials.

**B. Positions and Honors****Professional Positions**



1998–2000 Dept. of Probability and Statistics, Charles University, Prague, Czech Rep., Assistant Professor  
 2000–2003 Dept. of Biostatistics, University of Washington, Seattle, Research Assistant Professor  
 2004–2009 Dept. of Probability and Statistics, Charles University, Prague, Czech Rep., Assistant Professor  
 2010–2013 Dept. of Probability and Statistics, Charles University, Prague, Czech Rep., Associate Professor  
 2014– Dept. of Probability and Statistics, Charles University, Prague, Czech Rep., Chair

### Professional Memberships

1995- Member, American Statistical Association  
 1998- Member, Czech Statistical Society  
 2004- Member, International Biometric Society  
 2005- Member, International Society for Clinical Biostatistics

### Honors

1995 Donovan J. Thompson Award, University of Washington, Seattle, WA.  
 1997 Best Written Paper, International Biometric Society, Park City, UT.  
 2001 Bolzano Award, Bernard Bolzano Foundation, Prague, Czech Republic.

## C. Contributions to Science

### Design and conduct of HIV prevention trials

I have an expertise in design, conduct and analysis of large randomized HIV prevention trials. I was a protocol statistician in Project ACCEPT (HPTN043), a community-randomized trial conducted in five African and Asian sites, with HIV incidence calculated from cross-sectional blood samples as the primary endpoint. I designed methods for obtaining population samples by household-probability sampling, participated in data verification, performed analyses and collaborated on publications.

Genberg, B., **Kulich, M.**, Kawichai, S., Modiba, P., Chingono, A., Kilonzo, G., Richter, L., Pettifor, A., Sweat, M. & Celentano, D. HIV risk behaviors in Sub-Saharan Africa and Northern Thailand: Baseline behavioral data from Project Accept. *Journal of AIDS* 2008, 49(3):309-319. PMID: 18845954

Sweat, M., Morin, S., Celentano, D., Mulawa, M., Singh, B., Mbwambo, J., Kawichai, S., Chingono, A., Khumalo-Sakutukwa, G., Gray, G., Richter, L., **Kulich, M.**, Sadowski, A., Coates, T., and the Project Accept study team. Community-based intervention to increase HIV testing and case detection in people aged 16-32 years in Tanzania, Zimbabwe, and Thailand (NIMH Project Accept, HPTN 043): a randomised study. *The Lancet Infectious Diseases* 2011, 11(7), 525-532. PMID: 21546309

Coates, T.J., **Kulich, M.**, Celentano, D.D., Zelaya, C.E., Chariyalertsak, S., Chingono, A., Gray, G., Mbwambo, J.K.K., Morin, S.F., Richter, L., Sweat, M., van Rooyen, H., McGrath, N., Fiamma, A.,

1  
2  
3 Laeyendecker, O., Piwowar-Manning, E., Szekeres, G., Donnell, D., Eshleman, S.H. (2014) Effect of  
4 community-based voluntary counselling and testing on HIV incidence and social and behavioural  
5 outcomes (NIMH Project Accept; HPTN 043): A cluster-randomised trial. *The Lancet Global Health*  
6 2014, 2 (5), e267-e277. PMID: 25103167  
7

8  
9 Salazar-Austin, N., **Kulich, M.**, Chingono, A., Chariyalertsak, S., Srithanaviboonchai, K., Gray, G.,  
10 Richter, L., van Rooyen, H., Morin, S., Sweat, M., Mbwambo, J., Szekeres, G., Coates, T., Celentano, D.  
11 (2017) Age-Related Differences in Socio-Demographic and Behavioral Determinants of HIV Testing and  
12 Counseling in HPTN 043/NIMH Project Accept. *AIDS and Behavior* 2018, 22(2) 569-579. PMID:  
13 28589504  
14

### 15 16 17 **Methods for cross-sectional incidence estimation**

18 I participated in the development of laboratory and statistical methods for estimating HIV incidence from  
19 cross-sectional blood samples. These methods were needed for successful evaluation of the primary  
20 outcome in Project ACCEPT.  
21

22 Laeyendecker, O., Piwowar-Manning, E., Fiamma, A., **Kulich, M.**, Donnell, D., Bassuk, D., Mullis, C.  
23 E., Chin, C., Swanson, P., Hackett, Jr, J., Clarke, W., Marzinke, M., Szekeres, G., Gray, G., Richter, L.,  
24 Alexandre, M. W., Chariyalertsak, S., Chingono, A., Celentano, D. D., Morin, S. F., Sweat, M., Coates,  
25 T., Eshleman, S. H. Estimation of HIV Incidence in a Large, Community-Based, Randomized Clinical  
26 Trial: NIMH Project Accept (HIV Prevention Trials Network 043), *PLoS ONE* 2013, 8:7, e68349. PMID:  
27 23874597  
28

29 Laeyendecker, O., **Kulich, M.**, Donnell, D., Komárek, A., Omelka, M., Mullis, C. E., Szekeres, G.,  
30 Piwowar-Manning, E., Fiamma, A., Gray, R. H., Lutalo, T., Morrison, C. S., Salata, R. A., Chipato, T.,  
31 Celum, C., Kahle, E. M., Taha, T. E., Kumwenda, N. I., Karim, Q. A., Naranbhai, V., Lingappa, J. R.,  
32 Sweat, M. D., Coates, T., Eshleman, S. H. Development of Methods for Cross-Sectional HIV Incidence  
33 Estimation in a Large, Community Randomized Trial. *PLoS ONE* 2013, 8:11, e78818. PMID: 2423605  
34  
35

36 Fogel, J.M., Piwowar-Manning, E., Donohue, K., Cummings, V., Marzinke, M.A., Clarke, W., Breaud,  
37 A., Fiamma, A., Donnell, D., **Kulich, M.**, Mbwambo, J., Richter, L., Gray, G., Sweat, M., Coates, T.,  
38 Eshleman, S. Determination of HIV status in African adults with discordant HIV rapid tests. *Journal of*  
39 *Acquired Immune Deficiency Syndromes* 2015, 69, 430-438. PMID: 25835607  
40  
41

42 Fogel, J.M., Clarke, W., **Kulich, M.**, Piwowar-Manning, E., Breaud, A., Olson, M.T., Marzinke, M.A.,  
43 Laeyendecker O., Fiamma, A., Donnell, D., Mbwambo, J., Richter, L., Gray, G., Sweat, M., Coates, T.J.,  
44 Eshleman, S.H. Antiretroviral drug use in a cross-sectional population survey in Africa: NIMH Project  
45 Accept (HPTN 043). *Journal of Acquired Immune Deficiency Syndromes* 2017, 74, 158-165. PMID:  
46 27828875  
47  
48  
49  
50  
51  
52  
53  
54  
55  
56  
57  
58  
59  
60

# AUGUSTINE T CHOKO

**Institution:** Malawi Liverpool Wellcome Trust Clinical Research Programme

**General Medical Council (or equivalent) registration number** N/A

**Do you currently have personal medical malpractice insurance? (if so, name of insurer)**

N/A

**Project role**

Principal Investigator

## Qualifications

| Degree | Year | Subject                | Awarding Institution |
|--------|------|------------------------|----------------------|
| PhD    | 2018 | Epidemiology           | LSHTM                |
| MSc    | 2012 | Epidemiology           | LSHTM                |
| BSc    | 2009 | Statistics & Computing | University of Malawi |

## Positions held (last ten years)

| Start | End  | Organisation                          | Position title, brief description of responsibilities                                                                        |
|-------|------|---------------------------------------|------------------------------------------------------------------------------------------------------------------------------|
| 2020  | 2024 | Malawi Liverpool Wellcome Trust (MLW) | Wellcome Trust & National Institute for Health Research International Intermediate Fellow                                    |
| 2019  | 2020 | MLW                                   | Protocol Lead; leading design, implementation and write up of a complex primary health clinic randomized trial.              |
| 2015  | 2018 | MLW                                   | Wellcome Trust Fellow in Public Health and Tropical Medicine <ul style="list-style-type: none"> <li>▪ PhD student</li> </ul> |



2013 2015 MLW Research Assistant (Epidemiology)

- Data analysis and publication

2012 2013 MLW Trial Manager

- Leading implementation of a community-based cluster randomized trial (HIV/TB)

2009 2012 MLW Data Manager/Statistician

- Designing and administering study databases
- Preparing data for analysis and data analysis

**GCP training: course provider, date**

NIDA Clinical Trials Network, Obtained 11 November 2016, expires 2019

**Please list any institutions with which you are affiliated to**

Malawi Liverpool Wellcome Trust Clinical Research Programme, London School of Hygiene & Tropical Medicine

**Ethics training: details of training, course provider, date**

**Clinical trials experience: title of trial, role, dates (if multiple, restrict to most recent and most relevant)**

Secondary distribution of HIV self-tests through antenatal and HIV testing services: a pragmatic cluster-randomized trial (STAR-ANC); 2018-2019.

Partner-Provided Self-Testing and Linkage (PASTAL) adaptive multi-arm multi-stage cluster randomized trial; 2016-2017.

Intensified HIV / TB prevention linking home-based HIV testing, including the option of self-testing, with HIV care: a cluster-randomised trial in Blantyre, Malaw, Research Fellow, 2011-2015.

**Other professional experience relevant to role in project**

Experience in handling and analyzing large epidemiological datasets.

**Relevant recent publications (maximum 5)**

1. **Choko AT**, Corbett EL, Stallard N, Maheswaran H, Lepine A, Johnson CC, Sakala D, Kalua T, Kumwenda M, Hayes R, Fielding K. Effect of HIV self-testing alone or with additional

1  
2  
3 .....  
4 interventions including financial incentives on linkage to care or prevention among male  
5 partners of antenatal care attendees in Malawi: An adaptive multi-arm multi-stage cluster  
6 randomised trial. *PLoS Med* 2019 Jan 2;16(1):e1002719.

- 7 2. **Choko AT**, Fielding K, Stallard N, et al. Investigating interventions to increase uptake of HIV  
8 testing and linkage into care or prevention for male partners of pregnant women in antenatal  
9 clinics in Blantyre, Malawi: study protocol for a cluster randomised trial. *Trials*. 2017;18(1):349.
- 10 3. **Choko AT**, Kumwenda MK, Johnson CC, et al. Acceptability of woman-delivered HIV self-testing  
11 to the male partner, and additional interventions: a qualitative study of antenatal care  
12 participants in Malawi. *Journal of the International AIDS Society*. 2017;20(1):21610.
- 13 4. **Choko AT**, MacPherson P, Webb EL, et al. Uptake, Accuracy, Safety, and Linkage into Care over  
14 Two Years of Promoting Annual Self-Testing for HIV in Blantyre, Malawi: A Community-Based  
15 Prospective Study. *PLoS medicine*. 2015;12(9):e1001873.
- 16 5. **Choko AT**, Desmond N, Webb EL, et al. The uptake and accuracy of oral kits for HIV self-testing  
17 in high HIV prevalence setting: a cross-sectional feasibility study in Blantyre, Malawi. *PLoS*  
18 *medicine*. 2011;8(10):e1001102.  
19 .....  
20

# Khumbo Phiri Nyirenda

## CONTACTS

Partners in Hope

PO Box 302, Lilongwe.

Cell: 265882400721/ 265999 840 946

**Email: khumbophiri@gmail.com**

## ACADEMIC QUALIFICATIONS

- I. MPH, University of Malawi, College of medicine, anticipating graduation in 2020
- II. BSOC, Economics, University of Malawi, Chancellor College- February, 2006
- III. Malawi School Certificate of Education (MSCE) Phwezi Girls Sec School-June, 2000

## COURSES/ TRAININGS

- Qualitative research synthesis, university of cape town, faculty of health sciences February 2020
- Qualitative data analysis university of cape town, faculty of health sciences January 2020
- Biomedical Researchers and Staff modules (CITI program \_May 2016)
- Certificate of Attendance in Value chain analysis training by Ron Black from CNFA's farmer to farmer USAID funded program, Washington DC (February 23-27, 2009)
- Output marketing training in grain grading by CNFA/RUMARK facilitated by a North Carolina Agriculture Department officer, held at Natural Resources College (August 25 -28, 2009).
- Certificate of Attendance in a Leadership workshop facilitated by Engineers without Borders (October 26 – 28, 2009).
- Training of trainers course in Business management and technical knowledge by COMESA's ACTESA and IFDC in Lusaka, Zambia (September 6-15, 2010)

## WORK EXPERIENCE

### PARTNERS IN HOPE

**Position:** Implementation Science Manager

**Period:** September 2017 to date

Summary:

The Projects Research Coordinator is responsible for overseeing and implementing all research related activities at Partners in Hope (PIH) and in all program-supported sites. He/she is in charge of monitoring and evaluating projects and ensuring that PIH is accountable to research donors. This person works hand-in-hand with the University of California in Los Angeles (UCLA), Partners in Hope (PIH), the Ministry of Health (MoH) and other partners.

Responsibilities

## 1. Overseeing and implementing all research projects at Partners in Hope and all EQUIP-supported sites

### 2. Research applications, Reviews and Reports.

- Oversee applications for ethical review for the Malawi NHSRC and/or COMREC, including initial and renewal applications, as well as closeout of completed projects.
- Serve as the first line of direct communication with the NHSRC and/or COMREC to advocate for submitted applications.
- Work with UCLA, PIH, MoH and other partners to ensure all research is performed to the highest ethical standards and that data is securely managed.
- Make sure appropriate reporting is provided to the governing bodies (final reports, publications, etc.).
- Oversee submission of abstracts to research meetings.

### 3. Monitoring, Evaluation and Accountability to Donors

- Monitor all research projects and develop donor communications in collaboration with senior leadership, especially the M&E Team.
- Ensure timely production and submission of donor reports.
- Participate in development of strategies for expansion of research.
- Ensure continuous evaluation of projects and staff, including hiring and regular appraisals.

**Period:** December 2012 to March 2016

**Organization:** Partners in Hope

**Position:** Research coordinator

### Description

- Coordinates and administers research study associated activities. Assists in project planning and ensures that pre-established work scope, study protocol and regulatory (ethical review in Malawi and at UCLA) requirements are followed. Oversees and coordinates research staff. Develops and maintains record keeping systems and procedures. My job as Research Coordinator involves these main tasks
  - Assistance developing research proposals, data collection forms, and spreadsheets for organization of data. Develops and maintains record keeping systems and procedures.
  - Ensures the smooth and efficient day to day operation of research and data collection activities; acts as the primary administrative point of contact for EQUIP research staff.
  - Supervision of team of research assistants
  - Assistance with recruitment and coordination of research subjects as appropriate.
  - Supervision and assistance with quality control Data.
- Monitors the progress of research activities; develops and maintains records of research activities and prepares periodic and ad hoc reports as required by investigators, administrators and funding agencies(USAID quarterly reports) and regulatory bodies (NHSRC,UCLA,IRB)

- Assistance with preparing ethical review applications (HSRC) including frequent communication with NHSRC about status of pending applications.

## I. CARANA COOPERATION

**Position:** M&E/MIS Assistant

**Period:** November 2010–September 2011

### Description

Market Linkages Initiative was a project funded by **USAID** and implemented by ACDI/VOCA and CARANA Corporation. The two key objectives of the project are to strengthen and expand grain bulking systems and to integrate farmers to national and regional markets. My job as an M&E/MIS Specialist involved these main tasks:

- Assisting the M&E specialist in tracking MLI indicators, collecting and verifying information and maintaining PMP reports, work plans and reports(weekly, monthly updates, quarterly and annual) for Malawi activities
- Administering data collection tools to GBC/VACs and capacity building of grantees to keep relevant records and generate M&E reports as stipulated by the Grant agreement.
- Collating , analyzing and reporting in usable forms all data collected form GBC/VAC
- Supporting in the coming up of GIS map for MLI supported GBCs and its associated VACs in Malawi
- Administering M&E data collection tools and supervising M&E data collectors and ensure quality data collection
- Maintaining records of all source documents from grantees and other sources including filled questionnaires and interview reports
- Keeping records of field trip reports and monitor and updating field trip tracker for Malawi based MLI staff
- Undertaking case studies and documenting most significant change stories for selected GBCs/VACs/Farmers to monitor impacts of MLI work
- Maintaining an up to date filing system including project photos
- Ensuring that quality control procedures are met in terms of market data.
- Facilitating dissemination of market information to farmers on a timely and reliable basis using the E-platform
- Providing technical assistance on the E- platform to strategic partners
- Working alongside the new company and assisting/participating in development and deployment team to design and roll out a web to phone MIS platform

- Conducting weekly data checks on approved prices inside E-platform's price flagging module
- Manage a user, market and commodities database

## II. CNFA/RUMARK

**Position:** Monitoring and Evaluation Coordinator

**Period:** January 2009 to October 2010

CNFA/RUMARK implemented the Malawi Agrodealer Strengthening Program funded by AGRA. Its main objective was to develop rural-based, commercially-viable agrodealer networks and to work with agrodealers to improve the management, technical and financial capacity of their enterprises, thereby creating a rural market driven economic environment specifically designed to meet the unique needs of smallholder farmers. My position of as M&E coordinator involved the following tasks

- Monitoring progress of the project activities by doing surveys which included development of survey tools which mostly use participatory methods.
- Monitoring and evaluating the agrodealers performance in terms of sales as well as their financial status.
- Analysis of information on Agrodealer performance
- Verifying and identifying operational and potential agrodealers and recommending them for training to enable them get registered with CNFA
- Organizing promotional activities i.e. lottery competitions with the intention of creating customer database for surveys
- Playing a facilitating role in managing relationships between RUMARK and input supply companies to ensure cordial relationships and partnerships.
- Consolidating and analyzing results across CNFA's programs.
- Conducting training needs assessment for different categories of agrodealers to ensure equal treatment so that their specific needs are taken on board.
- Organizing the Agrodealers Annual Convention.
- Production of monthly as well as interim semi-annual reports for the Project
- Involved in advocating for policies which are conducive for agrodealers' business growth and sustainability through Private-public partnerships which involves working with various stakeholders including Government and civil society organizations.

## Research Abstracts

**Provider perspectives on barriers to reproductive health services for HIV-infected clients**

1  
2  
3 **in Central Malawi:** Khumbo Phiri, Margaret R Caplan , Julie Parent , Ann Phoya , Alan  
4 Schooley, and Risa M. Hoffman, Poster presentation at Interest 2017, Malawi

5  
6 **Barriers to ART uptake experienced by healthy clients in Malawi under Test and Treat:**  
7 Dovel, Kathryn, Khumbo Phiri, Alan Schooley, McDaphton Bellos, Esnart Sanudi, Denis  
8 Chasweka, Risa Hoffman, poster exhibition at the 9th IAS Conference on HIV Science (IAS  
9 2017, in Paris, France, 23-26 July 2017 and Interest 2017 in Malawi).

10  
11 **Facility-level barriers to antiretroviral therapy experienced by men in Malawi:** Dovel,  
12 Kathryn, Khumbo Phiri, Alan Schooley, Misheck Mphande, Mackenzie Chivwara, Risa  
13 Hoffman (poster presentation at interest 2017, Malawi)

14  
15 **Examining Malawi's Rollout of Universal Treatment: Policy Implementation and Provider**  
16 **Perceptions:** Misheck Mphande, Khumbo Phiri, Mackenzie Chivwara, Mike Nyirenda, Alan  
17 Schooley, Rachel Thomas, Risa Hoffman, Kathryn Dovel, (Poster presentation at IAS 2017 in  
18 Paris, France)

19  
20 **Low rates of successful defaulter tracing and re-engagement in care in Option B+ women**  
21 **in Central Malawi.** K. Phiri, J. Parent, T. Mulitswa, A. Schooley, R. Hoffman. Poster  
22 presentation at the International AIDS Society (IAS) conference (Durban, 2016).

23  
24 **The successes and Challenges of collaborating with Health Surveillance Assistants (HSAs)**  
25 **to trace Option B+ defaulters.** Khumbo Phiri Nyirenda, Julie Parent, Risa Hoffman, Alan  
26 Schooley, Temwanani Mulitswa

27  
28 **The Option B+ cascade: Characterizing uptake and retention in a USAID-PEPFAR**  
29 **program in rural Malawi.** Khumbo Phiri, Alan Schooley, Mackenzie Chivwala, Joseph Njala,  
30 Judy Currier, Andreas Jahn, Anteneh Worku, Perry Jansen, Risa Hoffman

31  
32 **Improvements and on-going challenges in exposed infants care at rural sites in Malawi.**  
33 Alan Schooley, Khumbo Phiri, Mackenzie Chivwala, Peter Chilikhoh, Antenneh worku, Risa  
34 Hoffman

35  
36 **Health Surveillance Assistants Can Successfully Perform Defaulter Tracing In Rural**  
37 **Malawi.** Mackenzie Chivwala, Khumbo Phiri, Risa Hoffman, Jimmy Chitsulo, Alan Schooley

38  
39 **Assessing the Potential Impact of Health Surveillance Assistants on HIV Care At The**  
40 **Facility And Community Level.** Mackenzie Chivwala, Khumbo Phiri, Weston Njamwaha,  
41 Peter Chilikhoh, Risa Hoffman, Alan Schooley

42  
43 **Mentee Perspectives on Factors Associated with a Successful HIV Mentorship Program**  
44 Mike Nyrienda, Chiulemu Kussen, Savior Mwandira, Khumbo Phiri, Chiukepo Longwe, Peter  
45 Chilikhoh, Risa Hoffman, Weston Njamwaha, Alan Schooley

46  
47 **Rapid Rollout of Viral Load Testing at Rural Health Facilities in Malawi.** Alan Schooley,  
48 Risa Hoffman, Mike Nyirenda, Savior Mwandira, Weston Njamwaha, Khumbo Phiri, Chifundo  
49 Chipungu, Mackenzie Chivwala, James Kandulu

50  
51 **Increased HIV testing after implementation of an innovative CD4 results reporting system**  
52 **in rural Malawi.** Alan Schooley, Mackenzie Chivwala, Reynier Ter Haar, George Mtonga,



1  
2  
3 Doreen Suwande, Kelvin Rambiki, Chiulemu Kussen, John Hamilton, Khumbo Phiri, Peter  
4 Chilikh, Risa Hoffman, Perry Jansen. Accepted for poster presentation at the 6th South African  
5 AIDS Conference, Durban, South Africa, 18-21 June 2013.  
6

7  
8 **Barriers to Adherence to ART in the Prevention of Mother-to-Child Transmission of HIV:  
9 Option B+ in Nkhoma, Malawi.** Paul Kawale, Alan Schooley, Virginia Tancioco, Danielle  
10 Wickman, Khumbo Phiri, Ella Bwanausi, Risa Hoffman. Accepted for poster presentation at the  
11 6th South African AIDS Conference, Durban, South Africa, 18-21 June 2013.  
12

### 13 MANUSCRIPTS ACCEPTED/PUBLISHED

14  
15  
16 **Successes and Challenges of HIV Mentoring in Malawi: The Mentee Perspective.** E. Chien,  
17 K. Phiri, A. Schooley, M. Chivwala, J. Hamilton, R. Hoffman. PLoS One. 2016 Jun;11(6).  
18

19 **CD4 variability in Malawian adults and implications for universal eligibility.** A.L. Schooley,  
20 P.S. Kamudumuli, S. Vangala, C.H. Tseng, C. Soko, J. Parent, K. Phiri, A. Jahn, D. Namarika,  
21 R. Hoffman. Open Forum Infect Dis. 2016 Aug;3(3).  
22

23  
24 **Provider perspectives on barriers to reproductive health services for HIV-infected clients  
25 in Central Malawi:** Margaret R Caplan, Khumbo Phiri, Julie Parent, Ann Phoya , Alan  
26 Schooley, and Risa M. Hoffman, PLOS ONE.  
27

28 **Factors Associated with Retention in Option B+ in Malawi: A Case Control Study:** Risa M.  
29 Hoffman, khumbo phiri, Julie parent, J Grotts D Elashoff, Paul Kawale, Sara Yeatman, J S  
30 Currier, A Schooley, JIAS.  
31

32  
33 **Training Course in Focused Assessment with Sonography for HIV/TB in HIV Prevalent  
34 Medical Centers in Malawi:** Timothy Canan, R Hoffman, Alan Schooley, Zachary Boas,  
35 Kristin Schwab, Daniel Kahn, Roger Shih, Khumbo Phiri, Julie Parent, Ben Allan Banda, Ronald  
36 Chagoma, Chifundo Chipungu. Kara-Lee Pool, Journal of Global Radiology  
37  
38

### 39 REFEREES

40 **Risa Hoffman (MD)**, Assistant Clinical Professor, David Gaffen school of medicine, UCLA,  
41 RHoffman@mednet.ucla.edu  
42

43  
44 **Rachel Sibande (PhD)**, Program Director, United Nations Foundation  
45 [rsibande@unfoundation.org](mailto:rsibande@unfoundation.org), +27670236497  
46

47 **Godfrey Chapola (PhD)**, Managing Director, RUMARK, P.O Box 31290, Lilongwe.  
48  
49 Cel: 0999792 070, [gchapola@rumark.org](mailto:gchapola@rumark.org)  
50  
51  
52  
53  
54  
55  
56  
57  
58  
59  
60



# Julie Hubbard

94 Culford Road London N1 4HN  
+44 7845 445338  
jhubbard@mednet.ucla.edu

## EDUCATION

London School of Hygiene and Tropical Medicine  
MSc Control of Infectious Diseases

Seattle Pacific University  
Bachelor of Arts: Sociology & Women's Studies  
Cum Laude GPA: 3.74  
Graduated July 2012

## PROFESSIONAL EXPERIENCE

University of California Los Angeles (UCLA), March 2017- Current  
Research Coordinator – 'INTERVAL' Study  
Lilongwe, Malawi and Lusaka, Zambia

- Supervise data collection by study personnel across 15 health facilities in southern and central Malawi. Coordinate field supervision to ensure data quality. Work with Principle Investigator (PI) to develop operating procedures for study implementation. Provide leadership and technical support to Zambia study team.

Harvest India USA, January 2016 – March 2017  
Director of Operations  
Costa Mesa, California and Andhra Pradesh, India

- Managed all aspects of operations to support, fundraise, and raise awareness for education and poverty alleviation initiatives amongst the Dalit, or 'untouchable', caste. Drafted and executed marketing campaigns to meet fundraising goals.

31 Bits International, December 2012 – February 2015  
Director of Operations  
Gulu, Northern Uganda

- Directed 160 beneficiaries and 6 Ugandan counselors in income generating projects. Developed and implemented in-depth monthly reports to evaluate income. Used data to identify hindrances to livelihood, such as domestic violence and HIV health complications. Organized necessary support through internal management or accessing external resources.

One Days Wages, March 2011- December 2012  
Chief Grant Analyst  
Seattle, Washington

- Generated extensive research on project proposals pertaining to the UN Millennium Development Goals and presented analyses for grant decisions.

Seattle Pacific University, September 2011- July 2012  
Research Assistant  
Seattle, Washington

- Edited, reviewed, and prepared research documents for Assistant Director of Women's Studies Program.

## PUBLICATIONS AND PRESENTATIONS

### *Publications*

Julie Hubbard, Gift Kakwesa, Mike Nyirenda, James Mwambene, Ashley Bardon, Kelvin Balakasi, Kathryn Dovel, Thokozani Kalua, Risa M Hoffman; Towards the third 90: improving viral load testing with a simple quality improvement program in health facilities in Malawi, *International Health*, , ihy083, <https://doi.org/10.1093/inthealth/ihy083>

Hubbard J, Moucheraud C, Lungu E, Bardon A, Balakasi K, Kakwesa G, Hoffman R ““I forget that I am a patient”: A qualitative assessment of 6 month dispensing of ART” (Under review)

Dovel K, Beagley M, Hubbard J, Orombi G, Thompson K “Including men without sidelining women: the feasibility of male involvement within a women’s empowerment program in northern Uganda” (Under review)

Dovel K, Hubbard J, Phiri K. “Gender and HIV services: The role of gender norms on ART initiation among men and women in Malawi.” (In preparation)

Peer reviewed poster presentations

“Gender and HIV services: The role of gender norms on ART initiation among men and women in Malawi.” Women in Global Health Scientific Conference. New York, New York. April 2018

“Towards the third 90: improving viral load testing with a simple quality improvement program in health facilities in Malawi” International Aids Society (IAS) Conference, Amsterdam, Netherlands. July 2018

### *Presentations*

“Innovations in differentiated service delivery: Six-month scripting lessons from Ethiopia, Malawi and Zambia” Colombia University Mailman School of Public Health. Webinar, April 2019

### **CERTIFICATIONS**

Confronting Gender Based Violence: Global Lessons with Case Studies from India Certification Course Coursera (Johns Hopkins University) - Online  
October 2015

- Epidemiology of gender-based violence, clinical care issues and how to provide psychosocial support for victims.

### **FELLOWSHIP**

Mennonite Central Committee

Community Development Associate, July-August 2011

- Rural and urban poverty field study in Recife, Brazil association under the direction of the Chair of the Sociology Department at Seattle Pacific University.

### **HONORS**

Seattle Pacific University Deans Scholar, 2008-2012

# BROOKE E. NICHOLS, PHD, MS

## OFFICE

### ADDRESS:

801 Massachusetts Avenue

Crosstown Center, 3<sup>rd</sup> Floor, Room 304

Boston, MA, USA 02118

+1 617 358 2403

Email: [brooken@bu.edu](mailto:brooken@bu.edu)

## ACADEMIC TRAINING:

|      |      |                                                                                                          |
|------|------|----------------------------------------------------------------------------------------------------------|
| 2015 | Ph.D | Department of Viroscience, Erasmus Medical Center (Rotterdam, the Netherlands)                           |
|      |      | <i>Mathematical Modeling and Cost-Effectiveness of Antiretroviral-Based HIV-1 Prevention Strategies.</i> |
| 2011 | M.S. | School of Public Health & Health Science, University of Massachusetts, Amherst                           |
|      |      | (Amherst, MA, USA), Epidemiology                                                                         |
| 2009 | B.A. | Mount Holyoke College (South Hadley, MA, USA), International Relations, <i>cum laude</i>                 |

## RESEARCH APPOINTMENTS:

|                |                     |                                                                                        |
|----------------|---------------------|----------------------------------------------------------------------------------------|
| 2019 – Present | Assistant Professor | Department of Global Health, School of Public Health,<br>Boston University, Boston, MA |
| 2018 – 2019    | Instructor          | Department of Global Health, School of Public Health,<br>Boston University, Boston, MA |
| 2017 – 2018    | Research Scientist  | Department of Global Health, School of Public Health,                                  |

|                |                      |  |                                                                                                                                                 |
|----------------|----------------------|--|-------------------------------------------------------------------------------------------------------------------------------------------------|
|                |                      |  | Boston University, Boston, MA                                                                                                                   |
|                |                      |  | Health Economics & Epidemiology Research Office, Wits                                                                                           |
| 2017 – Present | Principal Researcher |  | Health Consortium, Faculty of Health Sciences, University of Witwatersrand, Johannesburg, South Africa                                          |
| 2017 – Present | Researcher           |  | Joint Faculty Appointment, School of Clinical Medicine, Faculty of Health Sciences, University of the Witwatersrand, Johannesburg, South Africa |
| 2015 – 2016    | Postdoctoral Fellow  |  | Department of Viroscience, Erasmus Medical Center, Rotterdam, the Netherlands                                                                   |
| 2009 – 2010    | Research Assistant   |  | University of Massachusetts Amherst, School of Public Health & Health Sciences, Amherst, MA                                                     |

#### OTHER RESEARCH EXPERIENCE:

|             |                |  |                                                                                                                                          |
|-------------|----------------|--|------------------------------------------------------------------------------------------------------------------------------------------|
| 2012 – 2014 | Epidemiologist |  | Médecins Sans Frontières<br>Amsterdam, the Netherlands.<br>Project: <i>Spinal cord injury outcomes in Sri Lanka</i>                      |
| 2008 – 2009 | Researcher     |  | Ministry of Health and Social Services, Lüderitz, Namibia<br>Project: <i>Ecologic study on alcohol establishments and HIV prevalence</i> |

#### PROFESSIONAL APPOINTMENTS:

|             |                                     |  |                                        |
|-------------|-------------------------------------|--|----------------------------------------|
| 2008 – 2010 | Research Associate:<br>Epidemiology |  | Environ Corporation, Amherst, MA, USA. |
|-------------|-------------------------------------|--|----------------------------------------|

#### AWARDS AND HONOURS:

|      |  |  |                                                                                              |
|------|--|--|----------------------------------------------------------------------------------------------|
| 2019 |  |  | <b>Mary Lyon Award.</b> Mount Holyoke College Alumni Association. Award honors an alumna who |
|------|--|--|----------------------------------------------------------------------------------------------|

has demonstrated sustained achievement in her life and career consistent with the humane values

that Mary Lyon exemplified and inspired in others.

## CONFERENCE ORAL PRESENTATIONS:

\*Denotes graduate student or mentee

1. Popping S\*, Kall M, Stempher E, Versteegh L, **Nichols B**, van Sighem A, van de Vijver D, Boucher C, Verbon A, Delpech V. Country specific factors determine the quality of life among people with HIV in two western European countries.: 4<sup>th</sup> European Workshop on Health Living with HIV, Barcelona, Spain, September 2019.
2. Dovel K, Balakasi K, Shaba F, Offorjebe O, Gupta S, Wong S, Phiri K, Lungu E, Nyirenda M, **Nichols B**, Ngona K, Hoffman R. A randomized trial on index HIV self-testing for partners of ART clients in Malawi. Conference on Retroviruses and Opportunistic Infections (CROI), Seattle, USA, March 2019.
3. **Nichols BE**, Girdwood SJ\*, Crompton T, Stewart-Isherwood L, Berrie L, Chimhamhiwa D, Moyo C, Kuehnle J, Rosen S. Monitoring viral load for the last mile: what will it cost? AIDS, Amsterdam, Netherlands, July 2018.
4. Girdwood SJ\*, **Nichols BE**, Moyo C, Crompton T, Chimhamhiwa D, Rosen S. Optimizing access for the last mile: Geospatial cost model for point of care viral load instrument placement in Zambia. AIDS, Amsterdam, Netherlands, July 2018.
5. Dovel K, Nyirenda M, Shaba F, Offorjebe OA, Balakasi K, **Nichols BE**, Phiri K, Schooley A, Hoffman RM. Facility-based HIV self-testing for outpatients dramatically increases HIV testing in Malawi: a cluster randomized trial. AIDS, Amsterdam, Netherlands, July 2018.
6. **Nichols BE**, Hendrickson C, Sigwebela N, Moyo C, Fox MP, Rosen S. Prioritizing healthcare facilities for on-site mentorship to increase HIV treatment uptake: results from EQUIP. International AIDS Economics Network (IAEN) Conference, Amsterdam, Netherlands, July 2018.
7. van de Vijver DA, Richter A-K, Boucher CA, Gunsenheimer-Bartmeyer B, Kollan C, **Nichols BE**, Spinner C, Wasem J, Schewe K, Neumann A. Cost-effectiveness of pre-exposure prophylaxis in Germany (Kosteneffektivität der HIV-Präexpositionsprophylaxe in Deutschland). DGGÖ (German Society for health economics) Annual Meeting, Hamburg, Germany, March 2018.
8. van de Vijver DA, Richter A-K, Boucher CA, Gunsenheimer-Bartmeyer B, Kollan C, **Nichols BE**, Spinner C, Wasem J, Schewe K, Neumann A. Cost-effectiveness of pre-exposure prophylaxis for HIV-1 prevention in Germany. European AIDS Conference (EACS), Milan, Italy, October 2017.
9. Smit M, van Zoest RA, **Nichols BE**, Vaartjes I, Smit C, van der Valk M, van Sighem A, Wit FW, Hallett TB, Reiss P. Cardiovascular prevention policy in HIV: recommendations from a modeling study. Conference on Retroviruses and Opportunistic Infections (CROI), Seattle, WA. February 2017.
10. Popping S\*, **Nichols BE**, van Kampen JJA, Verbon A, Boucher CAB, van de Vijver DA. Intensive hepatitis C monitoring in previously HCV infected HIV-positive MSM is a cost saving method to

reduce the HCV epidemic. Netherlands Conference on HIV Pathogenesis, Epidemiology, Prevention and Treatment (NCHIV), Amsterdam, the Netherlands, November 2016.

11. **Nichols BE**, Boucher CAB, van der Valk M, Rijnders BJA, van de Vijver DA. PrEP is Only Cost-Effective Among MSM in the Netherlands When Used on Demand. Conference on Retroviruses and Opportunistic Infections (CROI), Boston, MA. February 2016.

12. **Nichols BE**, Boucher CAB, van der Valk M, Rijnders BJA, van de Vijver DA. On demand PrEP among MSM in the Netherlands: a cost-effective approach for preventing HIV-1 infections. Netherlands Conference on HIV

### Peer reviewed publications:

\*Authors contributed equally

\*\*Denotes graduate student or mentee

1. Dovel K, Nyirenda M, Shaba F, Offorjebe OA, Balakaksi K, **Nichols BE**, Cele R, Phiri K, Wong V, Gupta S, Hoffman RM. Effect of facility-based HIV self-testing on uptake of testing among adult outpatients in Malawi: a cluster-randomized trial. *The Lancet Global Health. In press.*
2. van Vliet MM\*\*, Hendrickson C\*\*, **Nichols BE**, Boucher CAB, Peters RPH, Polis CB, van de Vijver DAMC. Epidemiological impact and cost-effectiveness of long-acting pre-exposure prophylaxis combined with injectable contraceptives for HIV prevention in South Africa: a modelling study. *JIAS.* 2019, 22:e25427.
3. Long, L., Kuchukhidze, S., Pascoe, S., **Nichols, B.**, Cele R., Govathson, C., Flynn, D., Rosen, S. Differentiated Models of Service Delivery for Antiretroviral Treatment of HIV in sub-Saharan Africa: A Rapid Review Protocol. *Systematic Reviews.* 2019, 8:314.
4. Masuku S\*\*, Berhanu R, van Rensburg C, Ndjeka N, Rosen S, Long L, Evans D, **Nichols BE**. The costs of managing multi drug-resistant tuberculosis in South Africa: an economic evaluation of moving to a short-course treatment regimen containing bedaquiline. *International Journal of Tuberculosis and Lung Disease. In press.*
5. Hendrickson C\*\*, Long L\*, van de Vijver DA, Boucher CA, O'Bra H, Claassen CW, Njelesani M, Moyo C, Mumba DB, Subedar H, Mulenga L, Rosen S, **Nichols BE**. Novel metric for evaluating PrEP program effectiveness in real-world settings. *Lancet HIV. In press.*
6. Girdwood SJ\*\*, **Nichols BE**, Moyo C, Crompton T, Chimhamhiwa D, Rosen S. Optimizing access for the last mile: Geospatial cost model for point of care viral load instrument placement. *PLoS ONE.* 14(8):e0221586.
7. **Nichols BE**, Girdwood SJ\*\*, Crompton T, Stewart-Isherwood L, Berrie L, Chimhamhiwa D, Moyo C, Kuehnle J, Stevens W, Rosen S. Monitoring viral load for the last mile: what will it cost? *JIAS.* 2019, 22:e25337.
8. Popping S\*\*, **Nichols BE**, van Kampen JJA, Verbon A, Boucher CAB, van de Vijver DA. Targeted HCV core antigen monitoring among HIV-positive men-who-have-sex-with-men is cost-saving. *Journal of Virus Eradication.* 2019; 5:179-190.



- 1
- 2
- 3
- 4 9. **Nichols BE**, Girdwood SJ\*\*, Shibemba A, Sikota S, Gill C, Mwananyanda L, Scott L, Noble L, Carmona S, Rosen S, Stevens W. Cost and impact of dried blood spot versus plasma separation card for viral load testing in resource limited settings. *Clinical Infectious Diseases*. Advance article: 10.1093/cid/ciz338.
- 5
- 6
- 7
- 8
- 9 10. van de Vijver DA, Richter A-K, Boucher CA, Gusenheimer-Bartmeyer B, Kollan C, **Nichols BE**, Spinner CD, Wasem J, Schewe K, Neumann A. Cost-effectiveness and budget impact of generic pre-exposure prophylaxis for HIV-1 prevention in Germany. *Eurosurveillance*. 2019 Feb; 24(7).
- 10
- 11
- 12
- 13 11. Popping S\*\*, Hulligie SJ, Boerekamps A, Rijnders BJA, de Knecht RJ, Rockstroh JK, Verbon A, Boucher CAB, **Nichols BE**, van de Vijver DA. Early treatment of acute HCV infection is cost-effective in HIV-infected men-who-have-sex-with-men. *PLoS One*, 2019. 14(1):e0210179.
- 14
- 15
- 16
- 17 12. **Nichols BE**, Girdwood SJ\*\*, Crompton T, Stewart-Isherwood L, Berrie L, Chimhamhiwa D, Moyo C, Kuehne J, Stevens W, Rosen S. Impact of a borderless sample transport network for scaling up viral load monitoring: results of a geospatial optimization model for Zambia. *JLAS*. 2018, 21:e25206.
- 18
- 19
- 20
- 21 13. Dovel K, Shaba F, Nyirenda M, Ogechukwu AO, Balakasi K, Phiri K, **Nichols BE**, Tseng C-H, Bardon A, Namachapa KN, Hoffman RM. Evaluating the integration of HIV self-testing into low-resource health systems: a study protocol for a cluster randomized control trial from EQUIP Innovations. *Trials*, 2018. 19:498.
- 22
- 23
- 24
- 25
- 26 14. Phillips AN, Cambiano V, Nakagawa F, Revill P, Jordan MR, Hallett TB, Doherty M, De Luca A, Lundgren JD, Mhangara M, Apollo T, Mellors J, **Nichols B**, Parikh U, Pillay D, Rinke de Wit T, Sigaloff K, Havlir D, Kuritzkes DR, Pozniak A, van de Vijver D, Vitoria M, Wainberg MA, Raizes E, Bertagnolio S, Working Group on Modelling Potential Responses to High Levels of Pre-ART Drug Resistance in Sub-Saharan Africa. Cost-effectiveness of public-health policy options in the presence of pretreatment NNRTI drug resistance in sub-Saharan: a modelling study. *Lancet HIV*, 2018. 5(3):e146-e154.
- 27
- 28
- 29
- 30
- 31
- 32
- 33 15. Smit M, van Zoest RA, **Nichols BE**, Vaartjes I, Smit C, van der Valk M, van Sighem A, Wit FW, Hallett TB, Reiss P; Netherlands ATHENA observational HIV cohort. Cardiovascular disease prevention policy in HIV: recommendations from a modelling study. *Clinical Infectious Diseases*, 2018. 66(5):743-750.
- 34
- 35
- 36
- 37
- 38 16. Luiken GPM, Joore IK, Taselaar A, Schuit SCE, Geerlings SE, Govers A, Rood PPM, Prins JM, **Nichols BE**, Verbon A, de Vries-Sluijs TEMS. Non-targeted HIV screening in emergency departments in the Netherlands. *The Netherlands Journal of Medicine*, 2017. 75(9):386-393.
- 39
- 40
- 41
- 42 17. **Nichols BE**, Boucher CAB, van der Valk M, Rijnders BJA, van de Vijver DAMC. Cost-effectiveness analysis of pre-exposure prophylaxis for HIV-1 prevention in the Netherlands: a mathematical modelling study. *Lancet Infectious Diseases*, 2016. 16(12):1423-1429.
- 43
- 44
- 45
- 46 18. **Working Group on Modelling of ART Monitoring Strategies in Sub-Saharan Africa**. Sustainable HIV Treatment in Africa through Viral Load-Informed Differentiated Care. *Nature*, 2015. 528(7580):S68-76.
- 47
- 48
- 49
- 50 19. **Nichols BE**, Gotz HM, van Gorp ECM, Verbon A, Rokx C, Boucher CAB, van de Vijver DAMC. Partner notification for reduction of HIV-1 transmission and related costs among men who have sex with men: a mathematical modeling study. *PLoS One*, 2015. 10(11):e0142576.
- 51
- 52
- 53
- 54
- 55
- 56
- 57
- 58
- 59

- 1  
2  
3  
4  
5  
6  
7  
8  
9  
10  
11  
12  
13  
14  
15  
16  
17  
18  
19  
20  
21  
22  
23  
24  
25  
26  
27  
28  
29  
30  
31  
32  
33  
34  
35  
36  
37  
38  
39  
40  
41  
42  
43  
44  
45  
46  
47  
48  
49  
50  
51  
52  
53  
54  
55  
56  
57  
58  
59  
60
20. **Nichols BE**, Sigaloff KC, Kityo C, Hamers RL, Baltussen R, Bertagnolio S, Jordan MR, Hallett TB, Boucher CA, Rinke de Wit TF, van de Vijver DA. Increasing the use of second-line therapy is a cost-effective approach to prevent the spread of drug-resistant HIV: a mathematical modelling study. *J Int AIDS Soc*, 2014. 17:19164.
  21. **Nichols BE**, Baltussen R, van Dijk JH, Thuma PE, Nouwen JL, Boucher CA, van de Vijver DA. Cost-effectiveness of PrEP in HIV/AIDS control in Zambia: a stochastic league approach. *J AIDS*, 2014. 66(2):221-8.
  22. Eaton JW, Menzies NA, Stover J, Cambiano V, Chindelevitch L, Cori A, Hontelez JAC, Humair S, Kerr CC, Klein DJ, Mishra S, Mitchell KM, **Nichols BE**, Vickerman P, Bakker R, Barnighausen T... Hallett TB. How should HIV programmes respond to evidence for the benefit of earlier treatment initiation? A combined analysis of twelve mathematical models. *Lancet Global Health*, 2014. 2:e23-34.
  23. Armstrong JC\*, **Nichols BE\***, Wilson JM, Cosico RA, Shanks L. Spinal cord injury in the emergency context: review of program outcomes of a spinal cord injury rehabilitation program in Sri Lanka. *Conflict and Health*, 2014. 8(1):4.
  24. **Nichols BE**, Sigaloff KC, Kityo C, Mandaliya K, Hamers RL, Bertagnolio S, Jordan MR, Boucher CA, Rinke de Wit TF, van de Vijver DA. Averted HIV infections due to expanded antiretroviral treatment eligibility offsets risk of transmitted drug resistance: A modeling study. *AIDS*, 2014. 28(1):73-83.
  25. van de Vijver DA, **Nichols BE**, Abbas UL, Boucher CA, Cambiano V, Eaton JW, Glaubius R, Lythgoe K, Mellors J, Phillips A, Sigaloff KC, Hallett TB. Pre-Exposure Prophylaxis will have a limited impact on HIV-1 drug resistance in sub-Saharan Africa: A comparison of mathematical models. *AIDS*, 2013. 27(18):2943-2951.



# Alemayehu Amberbir

POSITION TITLE: Epidemiologist

eRA Commons User Name: A.AMBERBIR\_DI

## EDUCATION/TRAINING

| INSTITUTION AND LOCATION      | DEGREE<br>(if applicable) | YEAR(s) | FIELD OF STUDY |
|-------------------------------|---------------------------|---------|----------------|
| Haramaya University, Ethiopia | BSc                       | 2004    | Health Officer |
| Jimma University, Ethiopia    | MPH                       | 2007    | Public Health  |
| University of Nottingham, UK  | PhD                       | 2012    | Epidemiology   |

## Positions and Honors

Sept 2003 – Jun 2004 Intern (Clinical/Public Health), Haramaya University & Hiwot Fana Hospital, Ethiopia  
 Oct 2004 – Sept 2005 HIV/AIDS Prevention and Care Program Officer, Menschen Für Menschen, Ethiopia  
 Aug 2007 - Mar 2008 Lecturer, Department of Epidemiology and Biostatistics, Jimma University, Ethiopia  
 Feb 2008 – Mar 2011 Honorary Lecturer, Addis Ababa University, Ethiopia  
 Feb 2008 – Feb 2012 Research Fellow, University of Nottingham, UK  
 Mar 2012 – Sep 2013 Research Fellow, London School of Hygiene and Tropical Medicine, UK  
 Oct 2013 – Jan 2016 Lecturer, London School of Hygiene and Tropical Medicine, UK  
 Jan 2016 – Jun 2019 Epidemiologist, Dignitas International  
 Jan 2018 – Jun 2019 Adjunct Lecturer, Dalla Lana School of Public Health, University of Toronto  
 Jan 2018 – Dec 2019 Postdoctoral Fellow; CIHR Canadian HIV Trials Network (CTN), Canada  
 Aug 2019 – present Science Director, University of California Los Angeles; David Geffen School of Medicine

## Contribution to Science

*Investigating non-communicable diseases (hypertension, diabetes and asthma) in Africa (selected)*

- Soares ALG, Banda L, **Amberbir A**, Jaffar S, Musicha C, Price A, Nyirenda MJ, Lawlor DA, Crampin A. Sex and area differences in the association between adiposity and lipid profile in Malawi. *BMJ Glob Health*. 2019 Sep 11;4(5):e001542. doi: 10.1136/bmjgh-2019-001542.
- Amberbir A**. The challenge of worldwide tuberculosis control: and then came diabetes. *Lancet GlobHealth*. 2019 Apr;7(4):e390-e391. doi: 10.1016/S2214-109X(19)30053-1.
- Amberbir A**, S Lin, J Berman, et al A Muula, D Jacoby, E Wroe et al. Systematic review of hypertension and diabetes burden and risk factors and interventions for prevention and control in

1  
2  
3 Malawi: The NCD BRITE Consortium. *Glob Heart*. 2019 Jun;14(2):149-154. doi:  
4 10.1016/j.gheart.2019.05.004. Review.  
5

6 4. **Amberbir A**, Banda V, Singano V, Matengeni A, Pfaff C, Ismail Z, Allain TJ, Chan AK,  
7 Sodhi SK, van Oosterhout JJ. Effect of cardio-metabolic risk factors on all-cause mortality  
8 among HIV patients on antiretroviral therapy in Malawi: A prospective cohort study. *PLoS ONE*.  
9 2019 Jan 17;14(1):e0210629. doi: 10.1371/journal.pone.0210629. PMID: 30653539  
10

11 5. **Amberbir A**, Singano V, Matengeni A, Ismail Z, Kawalazira G, Chan AK, et al.  
12 Dyslipidemia among rural and urban HIV patients in south-east Malawi. *PLoS ONE* 2018;  
13 13(5): e0197728. <https://doi.org/10.1371/journal.pone.0197728>  
14

15 6. Price AJ, Crampin AC, **Amberbir A**, et al. Prevalence of obesity, hypertension and diabetes, and  
16 cascade of care in sub-Saharan Africa: a cross-sectional population-based study in rural and urban  
17 Malawi. *Lancet Diabetes Endocrinol* 2018; published online Jan 19.  
18 [http://dx.doi.org/10.1016/S2213-8587\(17\)30432-1](http://dx.doi.org/10.1016/S2213-8587(17)30432-1).  
19

20 7. \*The GBD 2015 Obesity Collaborators et al [**inc Amberbir A**]. Health Effects of Overweight  
21 and Obesity in 195 Countries over 25 Years. *N Engl J Med* 2017;377(1):13-27.  
22

23 8. Divala OH, **Amberbir A**, Ismail Z, Beyene T, Garone D, Pfaff C, Singano V, Akello H,  
24 Joshua M, Nyirenda MJ, Matengeni A, Berman J, Mallewa J, Chinomba GS, Kayange N, Allain  
25 TJ, Chan AK, Sodhi SK, van Oosterhout JJ. The burden of hypertension, diabetes mellitus, and  
26 cardiovascular risk factors among adult Malawians in HIV care: consequences. *BMC Public*  
27 *Health*. 2016 Dec 12;16(1):1243. PMID:27955664  
28

29 9. Crampin AC, Kayuni N, **Amberbir A**, Musicha C, Koole O, Tafatatha T, Branson K, Saul J,  
30 Mwaiyeghele E, Nkhwazi L, Phiri A, Price AJ, Mwagomba B, Mwansambo C, Jaffar S, Nyirenda  
31 MJ. Hypertension and Diabetes in Africa: Design and implementation of a large population-  
32 based study of burden and risk factors in rural and urban Malawi. *Emerging Themes in*  
33 *Epidemiology*. 2016, 13:3. DOI: 10.1186/s12982-015-0039-2  
34

35 10. Jaffar S, **Amberbir A**, Kayuni N, Musicha C, Nyirenda M. Viewpoint: scaling up testing  
36 services for noncommunicable diseases in Africa: priorities for implementation research. *Trop*  
37 *Med Int Health*. 2013Nov;18(11):1353-6. doi: 10.1111/tmi.12180. Epub 2013 Sep  
38

39 11. **Amberbir A**, Medhin G, Hanlon C, Britton J, Davey G, Venn A. Effects of early life  
40 paracetamol use on the incidence of allergic disease and sensitization: 5 year follow-up of an  
41 Ethiopian birth cohort. *PLoS ONE*. 2014 Apr 9;9(4):e93869. doi:  
42 10.1371/journal.pone.0093869.  
43

44 12. **Amberbir A**, Medhin G, Abegaz WE, Hanlon C, Robinson K, Fogarty A, Britton J, Venn  
45 A, Davey G. Exposure to *Helicobacter pylori* infection in early childhood and the risk of  
46 allergic disease and atopic sensitization: a longitudinal birth cohort study. *Clin Exp Allergy*.  
47 2014 Apr;44(4):563-71. doi:  
48

49 13. **Amberbir A**, Medhin G, Erku W, Alem A, Simms R, Robinson K, Fogarty A, Britton J, Venn  
50 A, Davey G. Effects of *Helicobacter pylori*, geohelminth infection and selected commensal  
51 bacteria on the risk of allergic disease and sensitization in 3-year-old Ethiopian children. *Clin*  
52 *Exp Allergy*. 2011 Oct;41(10):1422-30. doi: 10.1111/j.1365-2222.2011.03831.x. Epub 2011 Aug  
53 10.  
54  
55  
56  
57  
58  
59  
60

1  
2  
3  
4 14. **Amberbir A**, Medhin G, Alem A, Britton J, Davey G, Venn A. The role of acetaminophen  
5 and geohelminth infection on the incidence of wheeze and eczema: a longitudinal birth-cohort  
6 study. *Am J Respir Crit Care Med*. 2011 Jan 15;183(2):165-70. doi: 10.1164/rccm.201006-  
7 0989OC. Epub 2010 Oct 8.  
8  
9

10  
11 *HIV risk behaviours and status disclosure in African settings (selected)*

12 1) Dessalegn NG, Hailemichael RG, Shewa-Amare A, Sawleshwarkar S, Lodebo B, **Amberbir**  
13 **A**, Hillman RJ. HIV Disclosure: HIV-positive status disclosure to sexual partners among  
14 individuals receiving HIV care in Addis Ababa, Ethiopia. *PLoS One*. 2019 Feb  
15 15;14(2):e0211967. doi: 10.1371/journal.pone.0211967. eCollection 2019.  
16

17  
18 2) Deribe K, Woldemichael K, Wondafrash M, Haile A, **Amberbir A**. Disclosure experience  
19 and associated factors among HIV positive men and women clinical service users in  
20 Southwest Ethiopia. *BMC Public Health*. 2008 Feb 29;8:81. doi: 10.1186/1471-2458-8-81.  
21

22  
23 3) Biadgilign S, Deribew A, **Amberbir A**, Escudero HR, Deribe K. Factors associated  
24 with HIV/AIDS diagnostic disclosure to HIV infected children receiving HAART: a multi-  
25 center study in Addis Ababa, Ethiopia. *PLoS ONE*. 2011 Mar 21;6(3):e17572. doi:  
26 10.1371/journal.pone.0017572.  
27

28  
29 *Health system research in to infectious diseases – HIV – in Africa (selected)*

30 1. Alhaj M<sup>1,2¶</sup>, **Amberbir A**<sup>1¶</sup>, Singogo E, Banda V, van Lettow M, Matengeni A, Kawalazira  
31 G, Theu J, Jagriti MR, Chan AK, van Oosterhout JJ. Retention on antiretroviral therapy  
32 during universal test and treat implementation in Zomba district, Malawi: a retrospective  
33 cohort study. *J Int AIDS Soc*. 2019 Feb;22(2):e25239. doi: 10.1002/jia2.25239.  
34  
35

36 2. Singano V<sup>¶</sup>, **Amberbir A**<sup>¶</sup>, Garone D, Kandionamaso C, Msonko J; van Lettow M,  
37 Kalima K, Mataka, Kawalazira G, Mateyu G, Kwekwesa A, Matengeni A; van  
38 Oosterhout JJ. The burden of gynecomastia among men on Antiretroviral Therapy in  
39 Zomba, Malawi. *PLoS ONE* 12(11): e0188379: doi.org/10.1371/journal.pone.0188379  
40

41  
42 3. Mpawa H, Kwekwesa A, **Amberbir A**, Garone D, Divala OH, Kawalazira G, van Schoor V ,  
43 Ndindi H, van Oosterhout JJ. Virological outcomes of Antiretroviral Therapy in Zomba Central  
44 Prison, Malawi: *J Int AIDS Soc* 2017, 20:21623  
45

46 4. **Amberbir A**, Woldemichael K, Getachew S, Girma B, Deribe K. Predictors of adherence to  
47 antiretroviral therapy among HIV-infected persons: a prospective study in Southwest  
48 Ethiopia. *BMC Public Health*. 2008 Jul 30;8:265. doi: 10.1186/1471-2458-8-265.  
49

50  
51 5. Biadgilign S, Deribew A, **Amberbir A**, Deribe K. Barriers and facilitators to  
52 antiretroviral medication adherence among HIV-infected paediatric patients in  
53 Ethiopia: A qualitative study. *SAHARA J*. 2009 Dec;6(4):148-54.  
54  
55  
56  
57  
58  
59  
60

- 1  
2  
3 6. Deribe K, Hailekiros F, Biadgilign S, **Amberbir A**, Beyene BK. Defaulters from  
4 antiretroviral treatment in Jimma University Specialized Hospital, Southwest Ethiopia. *Trop*  
5 *Med Int Health*. 2008 Mar;13(3):328-33. doi: 10.1111/j.1365-3156.2008.02006.x. Epub  
6 2008 Feb 21.  
7  
8  
9  
10  
11  
12  
13  
14  
15  
16  
17  
18  
19  
20  
21  
22  
23  
24  
25  
26  
27  
28  
29  
30  
31  
32  
33  
34  
35  
36  
37  
38  
39  
40  
41  
42  
43  
44  
45  
46  
47  
48  
49  
50  
51  
52  
53  
54  
55  
56  
57  
58  
59  
60

For peer review only

# LAWRENCE C. LONG, PHD, MCOM

**OFFICE ADDRESS:** 801 Massachusetts Avenue,  
Crosstown Center, 3<sup>rd</sup> Floor, Room 369  
Boston, MA, 02119, USA.  
+1 (617) 358-3122  
Email: [lclong@bu.edu](mailto:lclong@bu.edu)

## ACADEMIC TRAINING:

|      |            |                                                                                                                                 |
|------|------------|---------------------------------------------------------------------------------------------------------------------------------|
| 2016 | Ph.D.      | School of Public Health, University of Witwatersrand (Johannesburg, South Africa)                                               |
| 2009 | M.Com.     | School of Economic and Business Sciences, University of Witwatersrand (Johannesburg, South Africa), Economics, <i>cum laude</i> |
| 2001 | B.Bus.Sci. | School of Economics, University of Cape Town (Cape Town, South Africa), Economics and Finance                                   |

## ACADEMIC LEADERSHIP:

|             |                      |                                                                                                                                      |
|-------------|----------------------|--------------------------------------------------------------------------------------------------------------------------------------|
| 2011 - 2017 | Deputy Division Head | Health Economics & Epidemiology Research Office<br>Wits Health Consortium<br>Faculty of Health Sciences, University of Witwatersrand |
| 2008 – 2011 | Research Coordinator | Health Economics & Epidemiology Research Office<br>Wits Health Consortium<br>Faculty of Health Sciences, University of Witwatersrand |

## RESEARCH APPOINTMENTS:

|        |                                 |                                                                                                                        |
|--------|---------------------------------|------------------------------------------------------------------------------------------------------------------------|
| –      | Research Assistant              | Department of Global Health, School of Public Health, Boston University                                                |
| 2017 t | Professor                       |                                                                                                                        |
| –      | Associate Researcher            | Joint Faculty Appointment, School of Clinical Medicine, Faculty of Health Sciences, University of the Witwatersrand    |
| 2008 t |                                 |                                                                                                                        |
| –      | Principal Researcher (Visiting) | Health Economics & Epidemiology Research Office<br>Wits Health Consortium<br>Faculty of Health Sciences, University of |
| 2008 t |                                 |                                                                                                                        |

|  |             |                    |                                           |
|--|-------------|--------------------|-------------------------------------------|
|  |             |                    | Witwatersrand                             |
|  |             |                    | Health Economics & Epidemiology           |
|  |             |                    | Research Office                           |
|  | 2006 – 2007 | Research Associate | Wits Health Consortium                    |
|  |             |                    | Faculty of Health Sciences, University of |
|  |             |                    | Witwatersrand                             |
|  |             |                    | Health Economics & Epidemiology           |
|  | 2005        | Study Coordinator  | Research Office                           |
|  |             |                    | Wits Health Consortium                    |
|  |             |                    | Faculty of Health Sciences, University of |
|  |             |                    | Witwatersrand                             |

#### OTHER RESEARCH EXPERIENCE:

|  |             |            |                                                                                                                                                                                                           |
|--|-------------|------------|-----------------------------------------------------------------------------------------------------------------------------------------------------------------------------------------------------------|
|  | 2007 – 2008 | Consultant | Center for International Health and Development,<br>Boston University School of Public Health<br>Project: <i>Cost and Outcomes of Models for Delivering Antiretroviral Therapy for HIV/AIDS in Zambia</i> |
|  | 2007 – 2008 | Consultant | Center for International Health and Development,<br>Boston University School of Public Health<br>Project: <i>Cost and Outcomes of Models for Delivering Antiretroviral Therapy for HIV/AIDS in Kenya</i>  |

#### TEACHING EXPERIENCE:

|  |      |                                                                                                                                                                                                                                                                                           |
|--|------|-------------------------------------------------------------------------------------------------------------------------------------------------------------------------------------------------------------------------------------------------------------------------------------------|
|  | 2019 | <b>Structural factors affecting HIV – an economists perspective.</b><br>Audience: MPH Students. Guest<br>Lecture in Individual, Community, and Population Health SPH GH 720<br>Boston University, Boston,<br>USA. Presented in two classes (Profs Monica Onyango & Jennifer Schlezinger). |
|  | 2019 | <b>Economic evaluation.</b> Audience: MPH Students. Guest Lecture in<br>Monitoring and Evaluation of<br>Global Health Programs SPH GH 745, Boston University, Boston, USA.                                                                                                                |
|  | 2019 | <b>Using economics to influence policy.</b> Audience: MPH Students. Guest<br>Lecture in Essential of<br>Economics and Finance for Global Health SPH GH 762, Boston<br>University, Boston, USA.                                                                                            |
|  | 2017 | <b>From cost to clinic – Economics changing health policy.</b> Audience:<br>MPH Students. Guest<br>Lecture in Essentials of Economics and Finance for Global Health SPH<br>GH 762, Boston University,<br>Boston, USA.                                                                     |
|  | 2016 | <b>Data collection and analysis for economic evaluations.</b> Audience:<br>Technical implementing<br>partners. EQUIP Partners Meeting,<br>Johannesburg, South Africa.                                                                                                                     |

- 1  
2  
3  
4 2016 **From patient to policy – Ensuring that your clinical practice is positioned to inform evidenced based policy.** Audience: HIV Clinicians. Chair of Research Skills Building Session, Southern African HIV Clinicians Society Conference, Johannesburg, South Africa.
- 5  
6  
7  
8  
9  
10 2014 **Introduction to Health Programme Evaluation.** Audience: MSc students – Module of Epidemiology for Health Researchers II. University of Witwatersrand, Johannesburg.

11  
12  
13  
14  
15  
16  
17 **INVITED PRESENTATION:**

- 18  
19 2019 **Costs and resources needed to provide HIV services to key populations over the next 10 years.** Idea creation meeting – Defining and addressing HIV treatment and prevention needs of underserved and high-risk populations. BMGF & Journal of International AIDS Society, New York, USA.
- 20  
21  
22  
23  
24  
25 2019 **Direct action to achieve a result.** Spotlight on “Think, Teach, Do”, School of Public Health, Boston University, Boston, USA.
- 26  
27  
28 2019 **Learning Community – Take home.** Academy for Faculty Advancement, School of Medicine, Boston University, Boston, USA.
- 29  
30  
31 2018 **Urban public health issues – the transition to Boston.** Health Economics and Epidemiology Research Office, Johannesburg, South Africa.
- 32  
33  
34 2017 **Partner’s Area of Expertise – Health Economics.** USAID South Africa, Partners Meeting, Pretoria, South Africa. Presented in absentia by Denise Evans.
- 35  
36  
37 2017 **Innovations Research on AIDS (INROADS).** Director Doug Arbuckle, Office HIV AIDS (OHA, USA). USAID, Johannesburg, South Africa. Presented in absentia by Denise Evans.
- 38  
39  
40  
41 2016 **Test and Start – Research supporting evidence based policy change.** Zambian Department of Health & USAID, EQUIP Project, Johannesburg, South Africa.
- 42  
43  
44  
45 2016 **Initiating ART at a patients first clinic visit: the RapIT randomised trial.** Faculty of Health Sciences Research Day, University of Witwatersrand, Johannesburg, South Africa.
- 46  
47  
48

49 **CONFERENCE ORAL PRESENTATIONS:**

- 50  
51  
52 1. Van Rensburg C, Berhanu R, Hirasen K, Evans D, Rosen S, **Long L.** Cost outcome analysis of decentralised care for drug-resistant tuberculosis in Johannesburg, South Africa. 49<sup>th</sup> Union World Conference on Lung Health, 24-27 October, The Hague, The Netherlands. 2018.
- 53  
54  
55  
56  
57  
58  
59  
60



2. Evans D, Musakwa N, Nattey C, Bor J, Lonnermark E, Larshans C, Andreasson S, Nyasulu P, **Long L**. Barriers to accessing care for HIV and Tuberculosis among adolescents and young adults aged 18 – 25 years in Johannesburg, South Africa. 5<sup>th</sup> SA TB Conference, 12-15 June, Durban, South Africa. 2018.
3. Lince-Deroche N, Leuner R, **Long L**. When Donor Funding Leaves: The immediate impact on resources of withdrawal of support for direct HIV care and treatment at public health facilities in Johannesburg. 9th International AIDS Society (IAS) Conference, 23-26 July, Paris, France. 2017.
4. Musakwa N, Evans D, Feeley A, Magwete M, Patz S, McNamara L, **Long L**, Sanne I. Acute malnutrition and dietary intake among paediatric HIV-positive patients initiating antiretroviral therapy in Johannesburg, South Africa. 8th SA AIDS Conference, 13-15 June, Durban, South Africa. 2017.
5. Rosen S, Maskew M, Fox MP, Nyoni C, Mongwenyana C, Maletse G, Sanne I, Bokaba D, Sauls C, Rohr J, **Long L**. Initiating ART at a Patient's First Clinic Visit: The RapIT Randomized Trial. Conference on Retroviruses and Opportunistic Infections (CROI) 2016, 22-25 February, Boston, USA.
6. Hirasen K, Berhanu R, Schnippel K, **Long L**, Rosen S, Sanne I. Twelve-month outcomes of patients initiating drug-resistant tuberculosis treatment at a decentralized outpatient clinic in Johannesburg, South Africa. 46th World Conference on Lung Health of the International Union Against Tuberculosis and Lung Disease (The Union), Cape Town, South Africa, 2-6 December 2015.
7. Evans D, Schnippel K, Budgell E, Shearer K, Berhanu R, **Long L**, Rosen S. Predictors of mortality in patients diagnosed with preXDR- and XDR-TB: results from the South African National TB Programme, 2009-2010. 46th World Conference on Lung Health of the International Union Against Tuberculosis and Lung Disease (The Union), Cape Town, South Africa, 2-6 December 2015.

#### BIBLIOGRAPHY:

ORCID ID: [0000-0003-4986-4988](https://orcid.org/0000-0003-4986-4988)  
<https://scholar.google.co.za/citations?user=fao8zDgAAAAJ&hl=en>  
 Google Scholar: <https://scholar.google.co.za/citations?user=fao8zDgAAAAJ&hl=en>

#### Peer reviewed publications:

1. **Long L**, Kuchukhidze S, Pascoe S, Nichols B, Cele R, Govathson C, Huber A, Flynn D, Rosen S. Differentiated models of service delivery for antiretroviral treatment of HIV in sub-Saharan Africa: a rapid review protocol. *Systematic Reviews*. DOI: 10.1186/s13643-019-1210-6. 2019.



- 1
- 2
- 3
- 4 2. Jamieson L, Evans D, Berhanu R, Ismail N, Aucock S, Wallengren K, **Long L**. Data quality of drug-resistant tuberculosis and antiretroviral therapy electronic registers in South Africa. *BMC Public Health*. DOI: 10.1186/s12889-019-7965-9. 2019.
- 5
- 6
- 7
- 8 3. Mokhele I, Mashamaite S, Majuba P, Xulu T, **Long L**, Onoya D. Effective public-private partnerships for sustainable antiretroviral therapy: outcomes of the Right to Care health services GP down-referral program. *BMC Public Health*. DOI: 10.1186/s12889-019-7660-x. 2019.
- 9
- 10
- 11
- 12
- 13 4. Lince-Deroche N, Leuner R, Meyer-Rath G, Pillay Y, **Long L**. When Donor Funding Leaves: A retrospective review of the impact of integrating direct HIV care and treatment into public health services in a region of Johannesburg. *Cost Effectiveness and Resource Allocation*. DOI: 10.1186/s12962-019-0192-5. 2019.
- 14
- 15
- 16
- 17 5. Musakwa N, Feeley A, Magwete M, Patz S, McNamara L, Sanne I, **Long L**, Evans D. Dietary intake among paediatric HIV-positive patients initiating antiretroviral therapy in Johannesburg, South Africa. *Vulnerable Children and Youth Studies (RVCH)*. DOI: 10.1080/17450128.2019.166858. 2019.
- 18
- 19
- 20
- 21 6. Brennan A, Bonawitz R, Gill CJ, Thea DM, Kleinman M, **Long L**, McCallum C, Fox MP. A Meta-analysis Assessing Diarrhea and Pneumonia in HIV-Exposed Uninfected Compared With HIV-Unexposed Uninfected Infants and Children. *Journal of Acquired Immune Deficiency Syndrome (JAIDS)*. DOI: 10.1097/QAI.0000000000002097. 2019
- 22
- 23
- 24
- 25
- 26
- 27 7. Berry KM, Rodriguez CA, Berhanu R, Ismail N, Rosen S, **Long L**, Evans D. Treatment outcomes among pediatrics, adolescents, and adults on treatment for drug-sensitive TB in two metropolitan municipalities in Gauteng Province, South Africa. *BMC Public Health*. DOI: 10.1186/s12889-019-7257-4. 2019.
- 28
- 29
- 30
- 31
- 32
- 33
- 34
- 35
- 36
- 37
- 38
- 39
- 40
- 41
- 42
- 43
- 44
- 45
- 46
- 47
- 48
- 49
- 50
- 51
- 52
- 53
- 54
- 55
- 56
- 57
- 58
- 59
- 60

## IN-DEPTH INTERVIEW FOR MEN – MIDLINE

### Section 1: Pre-Trial Experiences

1. At some point in the past, you stopped taking ARV's (or didn't start ART), which is why you were recruited into this study. Can you walk me through some of the reasons that it was difficult to stay on (or start) ART in the past?

### Section 2: Trial Experience

1. As a part of your participation in this study, you may have been visited a couple of times by different people. Did anything **bad** happen as a result of these visits?
2. Did someone discover your HIV status as a result of the study or as a result of taking ART since you enrolled?
3. How many times have you met with a health care worker (Patient Supporter/Nurse) about HIV (excluding ART clinic visits)?
  1. *If yes: Where did you meet this person?*
4. When this health care workers (Patient Supporter/Nurse) met with you, you may have gone through this Men's Counseling Flip Chart [SHOW THE FLIP CHART].
  1. Have you ever seen this flip chart?
    - i. IF YES: How was the counseling from this flip chart different from the counseling you have received in the past (before joining the study)?
    - ii. IF YES: What topic/idea from the flip chart was the most helpful to you?
    - iii. IF YES: You described to me earlier that you have missed ART in the past because of [X] reason. Did the new counseling with this flip chart help you deal with [X]? How?
    - iv. IF NO: When you met with the health care worker, can you briefly describe what you discussed?
5. As a part of the study, you may have been offered to be given ART in the home/community.
  1. Did you decide to get ART at home/in the community? *If NO: Skip to Question 6.*
  2. Why did you make the choice you made?
  3. Usually health care workers don't give people a choice of what service you get. But for you, you were given the option between home or facility. How did having this choice (having a say) make you feel?
6. How do you currently get ARTs?
  1. IF at HOME/COMMUNITY: How many times have you gotten your medication at home?
  2. If at the FACILITY: When you went back to the facility, did the did a health care worker/patient supporter offer you any other services?
    - i. What did they do?
    - ii. Was this helpful for you? Why/why not?
7. Has either HCW been supporting you or chatting with you about anything else in addition to HIV or ART?
  1. Do you ever contact either HCW directly to chat or ask questions?
    - i. IF YES: How often do you talk with them? What do you talk about?
  2. Is your relationship with either HCW different to the ones you have had with other HCWs before joining the study? How?
    - i. IF YES: Do you think this relationship helps you more than your relationship with other HCWs? IF YES: How?
8. Now think about overall your interactions with the health care workers you interacted with since you started the study – the Patient Supporter and the Nurse who brought you ART. What did you like about your interactions with them? How do you think it helps you with ART?

- 1  
2  
3  
4  
5  
6  
7  
8  
9
9. With everything in life, there are some things we like and some things that could be a little better. What did you NOT like about your interactions with the Patient Supporter and the Nurse who brought you ART?
  10. Is there anything else you think you need a health care worker or the health facility could do differently in order for you to be comfortable taking ART regularly? Is there anything else you need?

### Section 3: Initiation

11  
12  
13  
14  
15

Now I'd like to ask you about what has happened with your ARVs since you were enrolled in the study.

- 16  
17  
18  
19  
20  
21  
22  
23  
24  
25  
26  
27  
28  
29  
30  
31  
32  
33  
34  
35  
36  
37  
38  
39  
40  
41  
42  
43  
44  
45  
46  
47  
48  
49  
50  
51  
52  
53  
54  
55  
56  
57  
58  
59  
60
11. Did you start taking ART (again) since enrolling in the study?

*If YES:*

- a. Why did you (re) initiate ART? What convinced you it was good to take medication (again)?
- b. Who was most influential in your decision to start ART (again)?

*If NO:*

- c. Why have you not initiated ART since enrolling in the study?
- d. Has anyone influenced you to not start ART? Who? Why?
- e. Is there anything that could motivate/help you to initiate ART?

12. We know that starting ART can be difficult. What do you think is the most difficult thing about re-starting ART for you
13. Was there anything that made it easy for you to (re)start ART? (opposite of probes below)
  1. For those who opted for HOME-BASED: Do you think getting ART at home helped you re-engage in care? Why/why not?
14. For the next set of questions please feel free to be honest. There is no right or wrong answer.
  1. Do you feel MORE confident you can stay on ARTs in the future? Why/why not?
  2. Is there someone in your life now that encourages you?
  3. Do you have a better relationship with HCWs / or trust them more? Why/why not?
  4. Do you have a plan so that you don't run out of ARVs if you're away or busy?
  5. Do you think ARVs help you reach your goals for making money and for your family? Why/why not?

## IN-DEPTH INTERVIEW FOR MEN – ENDLINE

### Section 1: Pre-Trial Experiences

1. Think about when you stopped taking ART **before** joining the study. Can you remember why you stopped swallowing ART pills?
2. Talk to me about some things that made it difficult for YOU to stay on (or start) ART BEFORE joining the study?

### Section 2: Post-Trial Experiences

3. As a part of the study, you received [ONLY MENTION THE SERVICE THAT ALIGNS WITH THE CLIENTS STUDY ARM: counseling, mentorship, counseling + home-based 1 month, counseling + home-based 3 months].
  - a. How did you feel about this service?
  - b. Was this helpful to you? How?
4. Since you enrolled in the study did you restart ARVs?
  - a. IF NEVER RE-INITIATED ART IN THE STUDY: Why have you not re-started ART since joining the study?

5. Think about the challenges you experienced BEFORE joining the study. [REFER BACK TO THE CHALLENGES MENTIONED IN QUESTION 1 and 2]. Have these challenges gone away or been reduced since you joined the study?
  - a. How?
  - b. Why has it changed/not changed?
6. Have you had any **new or different** challenges since joining the study (either to attend refill appointments or taking your ART)? What are they?
  - a. Why do you think you experience them now?
7. Are there things about attending refill appointments or swallowing ART that are now easier since you joined the study?
  - a. What are they? Why?
8. Think about what you discussed with the study HCW who met with you [he may or may not have used this flip chart]. When he chatted with you, he might have told you some things that were **new** to you about how to keep taking ARTs. Have you tried doing any of those things AFTER you met with the HCW?
  - a. What was it?
  - b. Did it help you? How?
  - c. If it did not help you, what challenges did you face?
9. Have you continued to talk to the study HCW since you first met with him?
  - a. Describe your relationship.
    - i. How frequently do you connect? In person, on the phone, both?
    - ii. What do you discuss?
    - iii. How is this relationship helpful for you and your life?
    - iv. Do you wish for your relationship with the HCW to continue [or continued in the case of the HCW being fired]? Why? Why not?
10. [GENERAL NOT JUST STUDY HCWS] What additional services/interventions [not materials/monetary] do you wish you could have to help you consistently access or swallow ART?
  - a. Would you need this for a short period of time (one time, or for a month) or would you need it ALL the time (for years)? Why?
11. Do you have other health concerns outside of HIV? What are they?
  - a. Is it easier or harder for you to get care for these concerns as compared to getting ART services? Why?

### Section 3: Repeat Treatment Interruption [ONLY FOR THOSE WHO REINTIATED]

Now I want to talk to you about your use of ART services since joining the study.

12. Have you missed an ART appointment or missed swallowing your medication on any day since you restarted ART?
 

If **NO**:
13. How have you managed to stay on ART? What strategies do you think are most useful to help you stay on ART? Are they different from the one's you mentioned before? Does someone or something specifically help you?
 

If **YES**:
14. Can you tell me what happened?
  - a. For how long did you stop taking ART?
  - b. How many times has it happened?
  - c. Why did you miss ART appointment/swallowing ART?
15. What do you think would make it easier for men like you to not miss doses of ART or ART appointments?
16. Have you started taking ARVS **again** after you missed doses or gone back to the facility after you missed a refill appointment?
 

If **NO** – skip to question 18

If **YES**
17. Did anything made it easy for you to (re)start ART AGAIN?

- 1  
2  
3  
4  
5  
6  
7
18. We know that restarting ART can be difficult. What fears/worries/concerns did you have to overcome in order to restart (again)?
19. What would make it easier for men like you to come back to the clinic after missing an appointment?

8  
9

#### Section 4: Client centered care choice experiment

- 10  
11  
12  
13  
14  
15  
16  
17  
18  
19  
20  
21  
22  
23  
24  
25  
26  
27  
28  
29  
30  
31  
32  
33  
34  
35
20. We know there is no such thing as a 'perfect' healthcare worker. We are all human. But today we want to give you the opportunity to think about key things you want if you had the perfect interaction with a health care worker. Here is a picture of a health care worker. Around him we have characteristics on different cards [McDaphton to read through the cards]
1. He treats me with respect
  2. His counseling message is easy to understand
  3. His counseling addresses my specific concerns
  4. He maintains privacy/keeps my secrets
  5. He keeps in contact with me (not just a one time counseling)
  6. He comes to the community to find me
  7. He treats me like family and cares for me as a person
  8. He asks me questions about my life/circumstances
  9. He takes his time with me (the counseling session is not rushed)
  10. He shares his own experiences openly as a fellow man
  11. He provides fast services
21. I'd like you to choose the 6 most important characteristics you think are essential for how you want to interact with health care workers. There is no right or wrong answers. This is about what matters to you.
- a. Why have you chosen these? What makes them very important to you?
22. Now you can only choose 3 of these characteristics. Look at your 6 characteristics in front of you. What THREE are the most important/essential characteristics for your health care worker to still provide you with the services you would like.
- a. Why have you chosen these? Why did you NOT choose the other three?

36  
37  
38  
39  
40  
41  
42  
43  
44  
45  
46  
47  
48  
49  
50  
51  
52  
53  
54  
55  
56  
57  
58  
59  
60

#### Section 5: Income

23. What things do you do to earn a living? Think about all the work you do – this may include several different things.
- a. How do you earn money (what kind of work do you do)?
  - b. Where do you work?
  - c. Do you travel for work?
  - d. How often do you work?
  - e. How do you usually find this work? How do employers/bosses or customers find you or how do you find markets for your products?
24. What would happen to you and/or your family if you spent a whole day at the clinic and did not earn any money that day?
- a. Is it possible for you to attend your ART appoint and not miss out on any income/money? How is this possible for you?
  - b. In the WORST case scenario: how much missed opportunities to earn money would you experience? What would be the biggest impact on your financial situation be if you attend a clinic appointment and miss work/work opportunities (exp: do you miss a client, did your shop not open, did you miss the chance to get a long term job?)
  - c. Does missing a day from making money impact your family? How?
